# Supplementary material for: Factors Governing Reactivity and Selectivity in Hydrogen Atom Transfer from C(sp3)–H Bonds of Nitrogen-Containing Heterocycles to the Cumyloxyl Radical
Source: PubMed Central journal article supplement (PMC9171822; doi:10.1021/acs.joc.2c00955), 2022-05-24
Supplement: jo2c00955_si_001.pdf [file jo2c00955_si_001.pdf]

## SUPPORTING INFORMATION

### **Factors Governing Reactivity and Selectivity in Hydrogen Atom Transfer from C(*sp*<sup>3</sup>)-H Bonds of Nitrogen Containing Heterocycles to the Cumyloxyl Radical.**

Marco Galeotti, Chiara Trasatti, Sergio Sisti, Michela Salamone,\* and Massimo Bietti\*

*Dipartimento di Scienze e Tecnologie Chimiche, Università "Tor Vergata", Via della Ricerca Scientifica, 1 I-00133 Rome, Italy.*

*E-mail: michela.salamone@uniroma2.it, bietti@uniroma2.it*

|                                                                           |            |
|---------------------------------------------------------------------------|------------|
| <b>1) Chart of the substrates</b>                                         | <b>S2</b>  |
| <b>2) Laser flash photolysis studies</b>                                  | <b>S3</b>  |
| <b>2.1) <i>k</i><sub>obs</sub> vs [substrate] plots</b>                   | <b>S3</b>  |
| <b>2.1a) Absorbance vs. time plots for the reaction of S3 with CumO•</b>  | <b>S5</b>  |
| <b>2.1b) Absorbance vs. time plots for the reaction of S10 with CumO•</b> | <b>S14</b> |
| <b>2.2) Primary kinetic data</b>                                          | <b>S26</b> |

# 1) Chart of the substrates

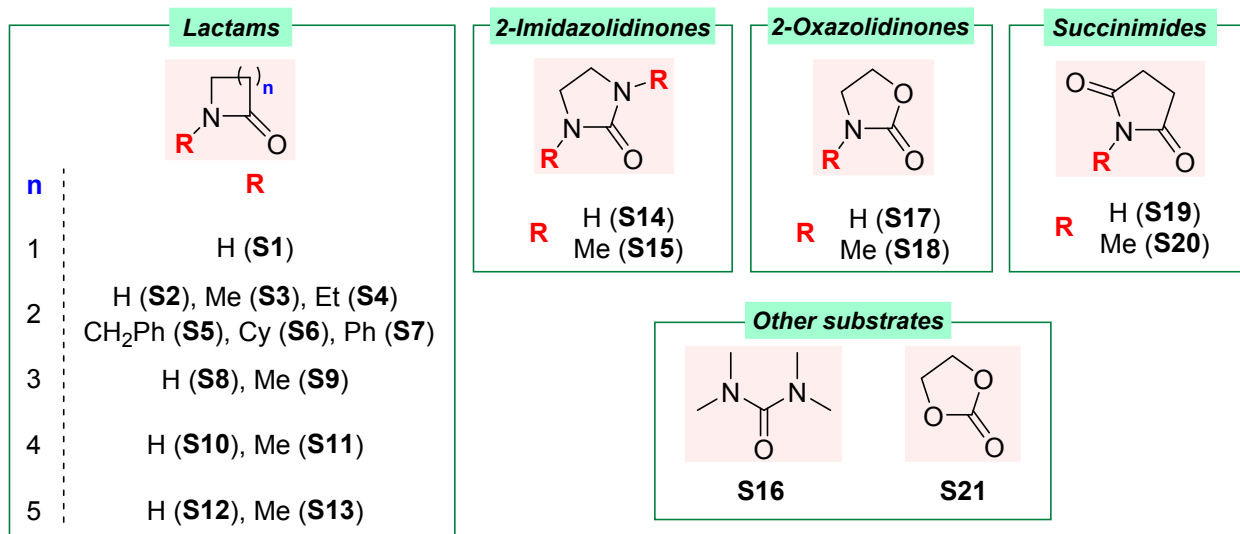

## 2) Laser flash photolysis studies

### 2.1) $k_{\text{obs}}$ vs [substrate] plots

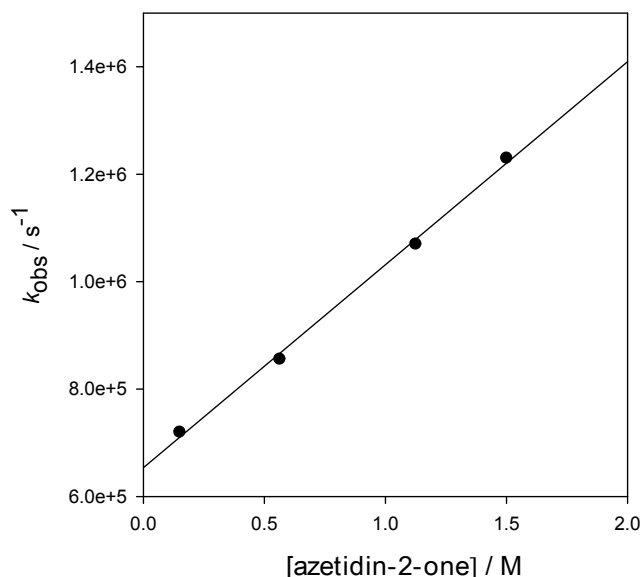

**Figure SI.1.** Plot of the observed rate constant ( $k_{\text{obs}}$ ) against [substrate] for the reaction of 2-azetidinone (S1) with  $\text{CumO}^\bullet$  generated by 355 nm LFP of an Ar-saturated MeCN solution containing 1.0 M dicumyl peroxide measured at  $T = 25^\circ\text{C}$  following the decay of  $\text{CumO}^\bullet$  at 490 nm. From the linear regression analysis: intercept =  $6.54 \times 10^5 \text{ s}^{-1}$ ,  $k_{\text{H}} = 3.78 \times 10^5 \text{ M}^{-1} \text{ s}^{-1}$ ,  $r^2 = 0.9976$ .

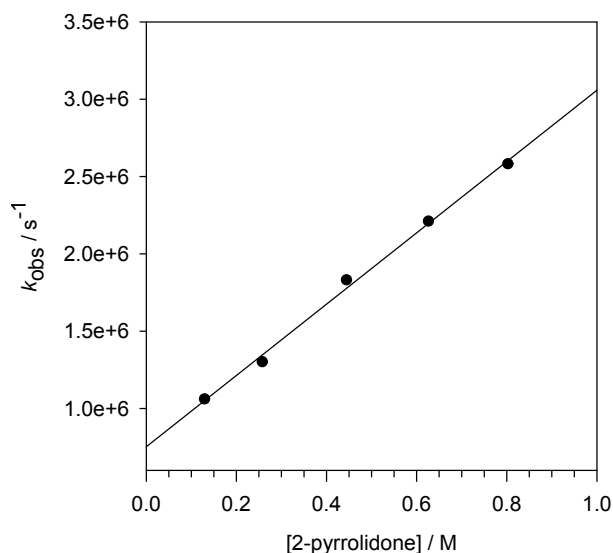

**Figure SI.2A.** Plot of the observed rate constant ( $k_{\text{obs}}$ ) against [substrate] for the reaction of 2-pyrrolidone (S2) with  $\text{CumO}^\bullet$  generated by 355 nm LFP of an Ar-saturated MeCN solution containing 1.0 M dicumyl peroxide measured at  $T = 25^\circ\text{C}$  following the decay of  $\text{CumO}^\bullet$  at 490 nm. From the linear regression analysis: intercept =  $7.52 \times 10^5 \text{ s}^{-1}$ ,  $k_{\text{H}} = 2.31 \times 10^6 \text{ M}^{-1} \text{ s}^{-1}$ ,  $r^2 = 0.9964$ .

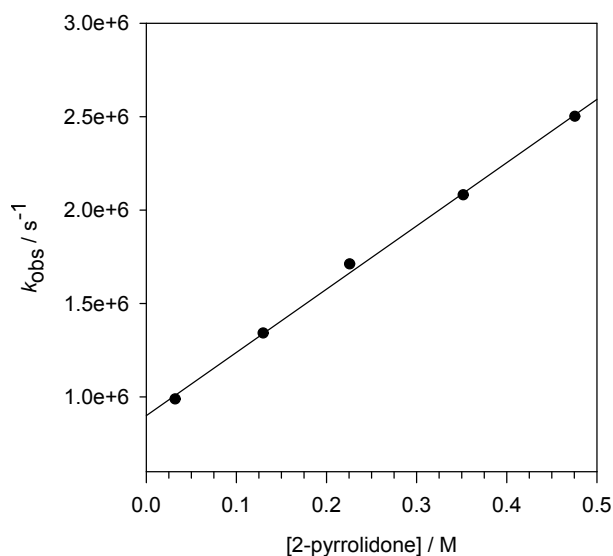

**Figure SI.2B.** Plot of the observed rate constant ( $k_{\text{obs}}$ ) against [substrate] for the reaction of 2-pyrrolidone (**S2**) with  $\text{CumO}^\bullet$  generated by 355 nm LFP of an Ar-saturated DMSO solution containing 1.0 M dicumyl peroxide measured at  $T = 25^\circ\text{C}$  following the decay of  $\text{CumO}^\bullet$  at 490 nm. From the linear regression analysis: intercept =  $9.00 \times 10^5 \text{ s}^{-1}$ ,  $k_{\text{H}} = 3.39 \times 10^6 \text{ M}^{-1} \text{ s}^{-1}$ ,  $r^2 = 0.9980$ .

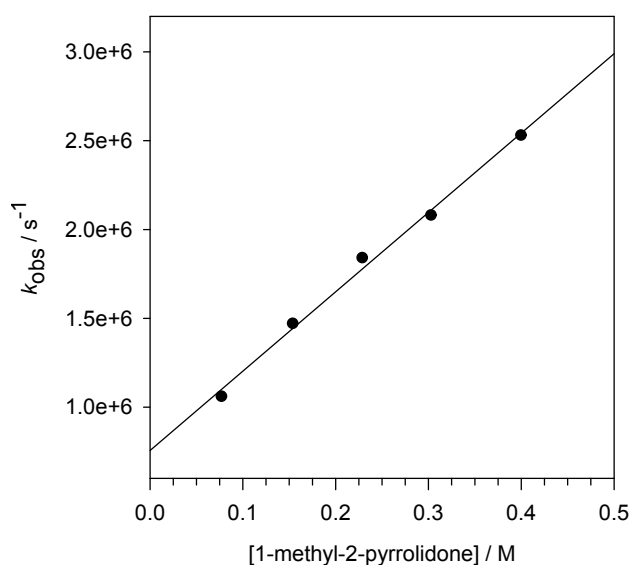

**Figure SI.3A.** Plot of the observed rate constant ( $k_{\text{obs}}$ ) against [substrate] for the reaction of 1-methyl-2-pyrrolidone (**S3**) with  $\text{CumO}^\bullet$  generated by 355 nm LFP of an Ar-saturated MeCN solution containing 1.0 M dicumyl peroxide measured at  $T = 25^\circ\text{C}$  following the decay of  $\text{CumO}^\bullet$  at 490 nm. From the linear regression analysis: intercept =  $7.57 \times 10^5 \text{ s}^{-1}$ ,  $k_{\text{H}} = 4.47 \times 10^6 \text{ M}^{-1} \text{ s}^{-1}$ ,  $r^2 = 0.9943$ .

## 2.1a) Absorbance vs. time plots for the reaction of S3 with CumO• (MeCN)

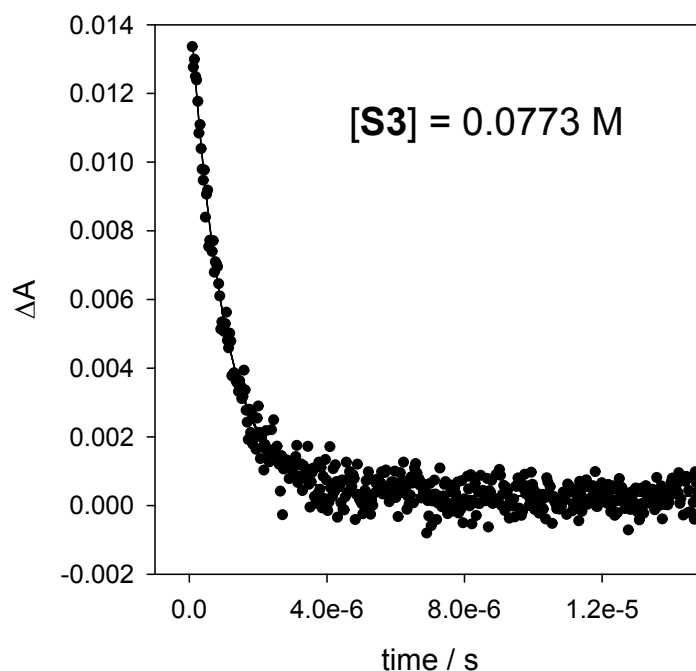

**Figure SI.3A-1** Plot of the change in absorbance ( $\Delta A$ ) monitored at 490 nm vs. time for the reaction of 1-methyl-2-pyrrolidone (S3) 0.0773 M with CumO• measured in Ar-saturated MeCN solution at T = 25 °C.

### Nonlinear Regression

Equation: Exponential Decay, Single, 3 Parameter

$$f=y_0+a*\exp(-b*x)$$

| R     | Rsqr   | Adj Rsqr | Standard Error of Estimate |
|-------|--------|----------|----------------------------|
| 0.846 | 0.9693 | 0.9692   | 0.0004                     |

|    | Coefficient  | Std. Error  | t       | P       | VIF    |
|----|--------------|-------------|---------|---------|--------|
| y0 | 0.0003       | 2.1613E-005 | 12.9918 | <0.0001 | 1.3493 |
| a  | 0.0146       | 0.0002      | 84.3541 | <0.0001 | 2.3632 |
| b  | 1036351.2897 | 17326.7200  | 59.8123 | <0.0001 | 2.7702 |

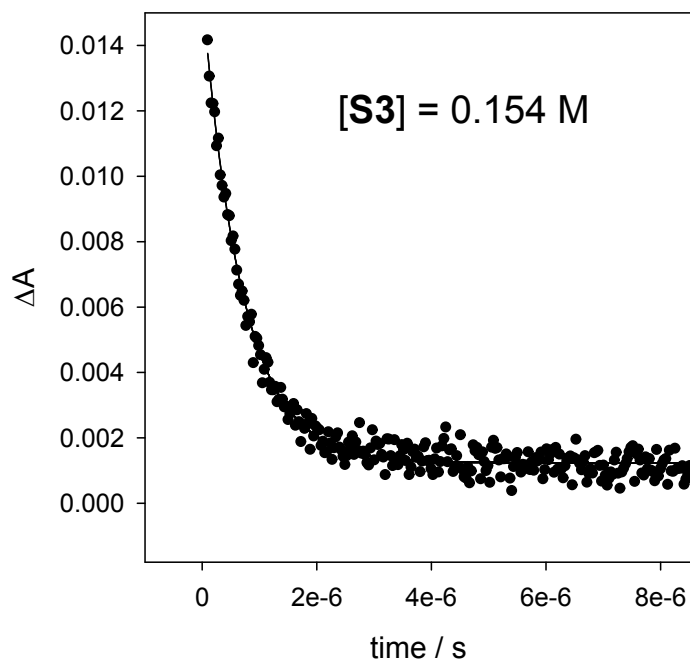

**Figure SI.3A-2.** Plot of the change in absorbance ( $\Delta A$ ) monitored at 490 nm vs. time for the reaction of 1-methyl-2-pyrrolidone (S3) 0.154 M with  $\text{CumO}^\bullet$  measured in Ar-saturated MeCN solution at  $T = 25^\circ\text{C}$ .

**Nonlinear Regression**

**Equation: Exponential Decay, Single, 3 Parameter**

$$f=y_0+a*\exp(-b*x)$$

**R      Rsqr    Adj Rsqr      Standard Error of Estimate**

0.9896   0.9793   0.9791      0.0003

|    | <b>Coefficient</b> | <b>Std. Error</b> | <b>t</b> | <b>P</b> | <b>VIF</b> |
|----|--------------------|-------------------|----------|----------|------------|
| y0 | 0.0012             | 2.6049E-005       | 47.4988  | <0.0001  | 1.4871     |
| a  | 0.0144             | 0.0002            | 76.3337  | <0.0001  | 2.5285     |
| b  | 1445822.9819       | 26572.3476        | 54.4108  | <0.0001  | 3.1280     |

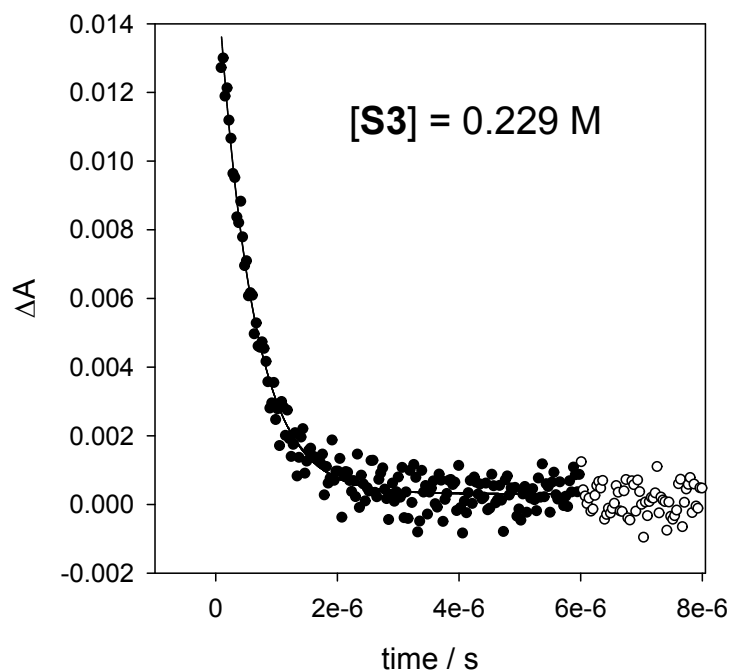

**Figure SI.3A-3.** Plot of the change in absorbance ( $\Delta A$ ) monitored at 490 nm vs. time for the reaction of 1-methyl-2-pyrrolidone (**S3**) 0.229 M with  $\text{CumO}^\bullet$  measured in Ar-saturated MeCN solution at  $T = 25^\circ\text{C}$ . The white data points have been excluded from the nonlinear regression analysis.

#### Nonlinear Regression

**Equation: Exponential Decay, Single, 3 Parameter**

$$f=y_0+a*\exp(-b*x)$$

**R      Rsqr    Adj Rsqr      Standard Error of Estimate**

0.9862   0.9725   0.9722      0.0005

|    | <b>Coefficient</b> | <b>Std. Error</b> | <b>t</b> | <b>P</b> | <b>VIF</b> |
|----|--------------------|-------------------|----------|----------|------------|
| y0 | 0.0003             | 4.2654E-005       | 7.2177   | <0.0001  | 1.6193     |
| a  | 0.0158             | 0.0003            | 54.6468  | <0.0001  | 2.6695     |
| b  | 1766296.8946       | 45292.8456        | 38.9973  | <0.0001  | 3.4634     |

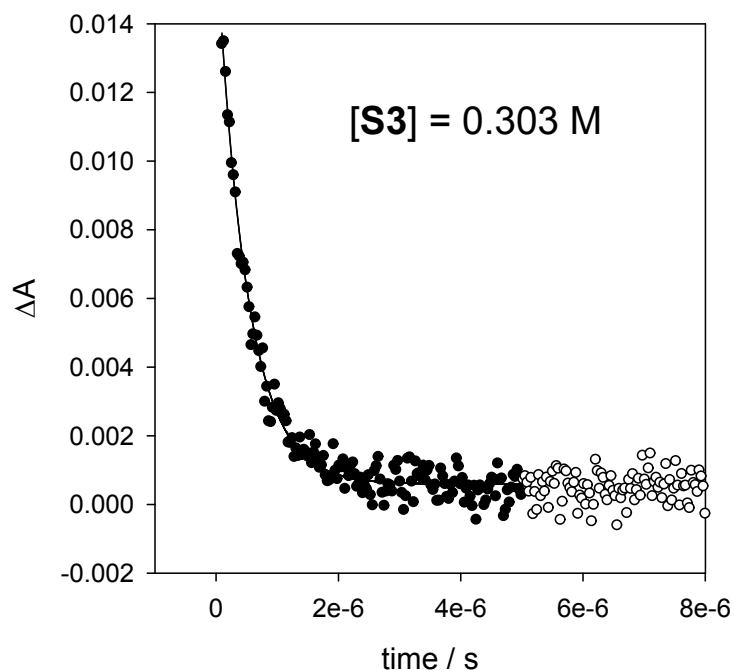

**Figure SI.3A-4.** Plot of the change in absorbance ( $\Delta A$ ) monitored at 490 nm vs. time for the reaction of 1-methyl-2-pyrrolidone (**S3**) 0.303 M with  $\text{CumO}^\bullet$  measured in Ar-saturated MeCN solution at  $T = 25^\circ\text{C}$ . The white data points have been excluded from the nonlinear regression analysis.

#### Nonlinear Regression

**Equation: Exponential Decay, Single, 3 Parameter**

$$f=y_0+a*\exp(-b*x)$$

**R      Rsqr    Adj Rsqr      Standard Error of Estimate**

0.9890   0.9781   0.9778      0.0004

|    | <b>Coefficient</b> | <b>Std. Error</b> | <b>t</b> | <b>P</b> | <b>VIF</b> |
|----|--------------------|-------------------|----------|----------|------------|
| y0 | 0.0006             | 4.2357E-005       | 14.0155  | <0.0001  | 1.6548     |
| a  | 0.0160             | 0.0003            | 54.7828  | <0.0001  | 2.7995     |
| b  | 2050697.4746       | 51574.8701        | 39.7616  | <0.0001  | 3.6687     |



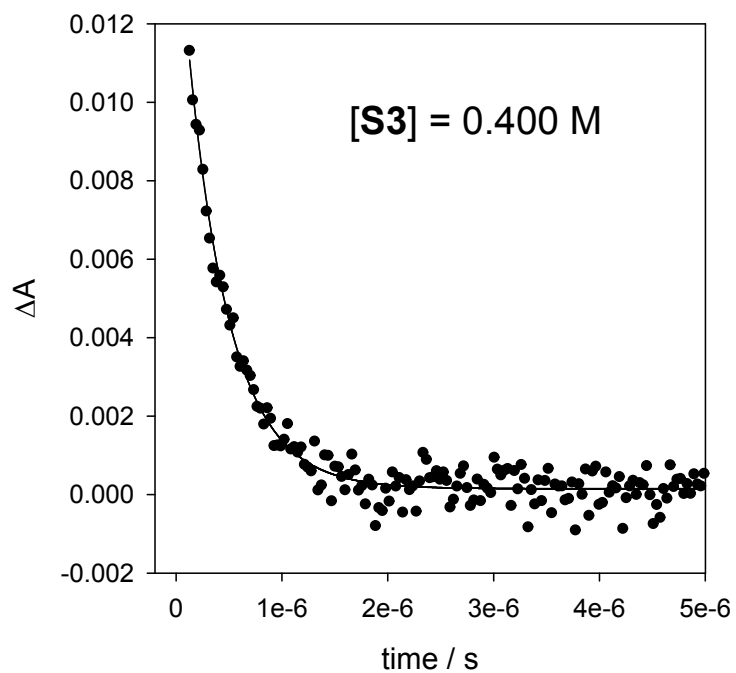

**Figure SI.3A-5.** Plot of the change in absorbance ( $\Delta A$ ) monitored at 490 nm vs. time for the reaction of 1-methyl-2-pyrrolidone (S3) 0.400 M with  $\text{CumO}^\bullet$  measured in Ar-saturated MeCN solution at  $T = 25^\circ\text{C}$ .

#### Nonlinear Regression

**Equation: Exponential Decay, Single, 3 Parameter**

$$f = y_0 + a \cdot \exp(-b \cdot x)$$

**R      Rsqr    Adj Rsqr      Standard Error of Estimate**

0.9832   0.9667   0.9663      0.0004

|    | <b>Coefficient</b> | <b>Std. Error</b> | <b>t</b> | <b>P</b> | <b>VIF</b> |
|----|--------------------|-------------------|----------|----------|------------|
| y0 | 0.0001             | 3.8745E-005       | 3.8609   | 0.0002   | 1.4847     |
| a  | 0.0150             | 0.0004            | 38.4952  | <0.0001  | 3.5169     |
| b  | 2504513.4144       | 77406.3885        | 32.3554  | <0.0001  | 4.2740     |

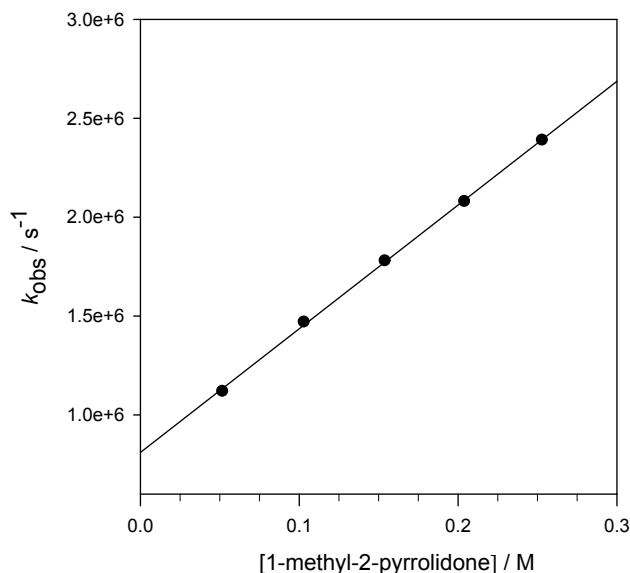

**Figure SI.3B.** Plot of the observed rate constant ( $k_{\text{obs}}$ ) against [substrate] for the reaction of 1-methyl-2-pyrrolidone (**S3**) with  $\text{CumO}^\bullet$  generated by 355 nm LFP of an Ar-saturated DMSO solution containing 1.0 M dicumyl peroxide measured at  $T = 25^\circ\text{C}$  following the decay of  $\text{CumO}^\bullet$  at 490 nm. From the linear regression analysis: intercept =  $8.10 \times 10^5 \text{ s}^{-1}$ ,  $k_{\text{H}} = 6.26 \times 10^6 \text{ M}^{-1} \text{ s}^{-1}$ ,  $r^2 = 0.9995$ .

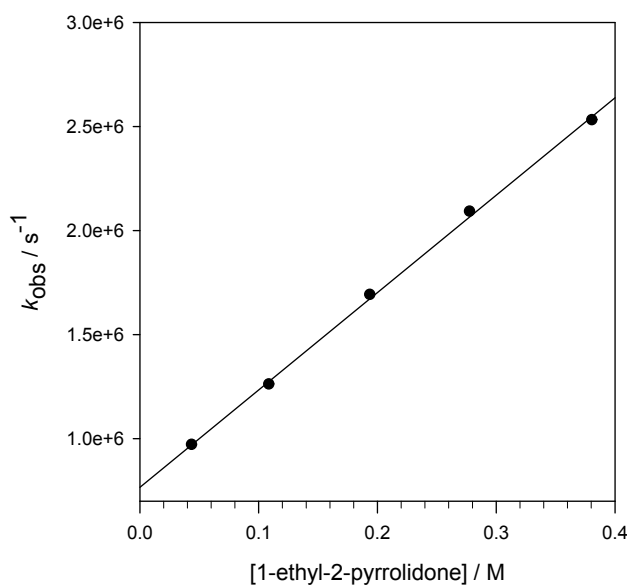

**Figure SI.4.** Plot of the observed rate constant ( $k_{\text{obs}}$ ) against [substrate] for the reaction of 1-ethyl-2-pyrrolidone (**S4**) with  $\text{CumO}^\bullet$  generated by 355 nm LFP of an Ar-saturated MeCN solution containing 1.0 M dicumyl peroxide measured at  $T = 25^\circ\text{C}$  following the decay of  $\text{CumO}^\bullet$  at 490 nm. From the linear regression analysis: intercept =  $7.66 \times 10^5 \text{ s}^{-1}$ ,  $k_{\text{H}} = 4.68 \times 10^6 \text{ M}^{-1} \text{ s}^{-1}$ ,  $r^2 = 0.9991$ .

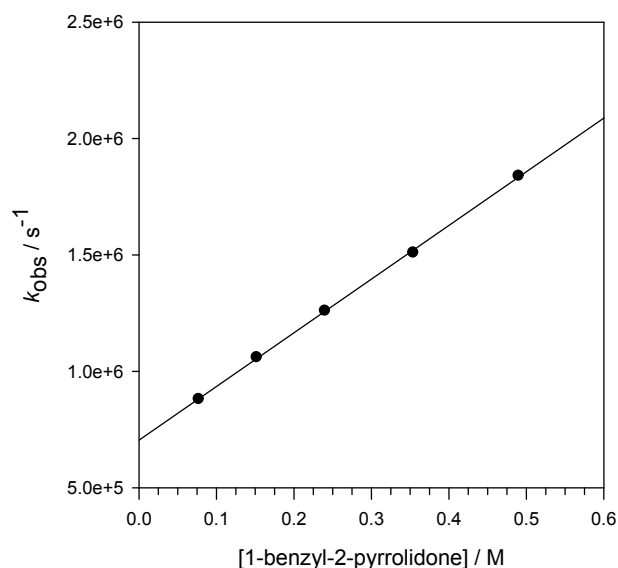

**Figure SI.5.** Plot of the observed rate constant ( $k_{\text{obs}}$ ) against [substrate] for the reaction of 1-benzyl-2-pyrrolidone (**S5**) with  $\text{CumO}^\bullet$  generated by 355 nm LFP of an Ar-saturated MeCN solution containing 1.0 M dicumyl peroxide measured at  $T = 25^\circ\text{C}$  following the decay of  $\text{CumO}^\bullet$  at 490 nm. From the linear regression analysis: intercept =  $7.05 \times 10^5 \text{ s}^{-1}$ ,  $k_{\text{H}} = 2.31 \times 10^6 \text{ M}^{-1} \text{ s}^{-1}$ ,  $r^2 = 0.9997$ .

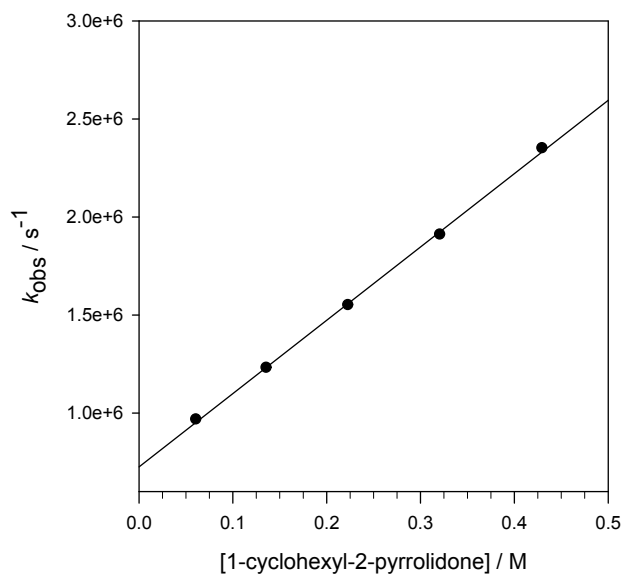

**Figure SI.6.** Plot of the observed rate constant ( $k_{\text{obs}}$ ) against [substrate] for the reaction of 1-cyclohexyl-2-pyrrolidone (**S6**) with  $\text{CumO}^\bullet$  generated by 355 nm LFP of an Ar-saturated MeCN solution containing 1.0 M dicumyl peroxide measured at  $T = 25^\circ\text{C}$  following the decay of  $\text{CumO}^\bullet$  at 490 nm. From the linear regression analysis: intercept =  $7.25 \times 10^5 \text{ s}^{-1}$ ,  $k_{\text{H}} = 3.74 \times 10^6 \text{ M}^{-1} \text{ s}^{-1}$ ,  $r^2 = 0.9993$ .

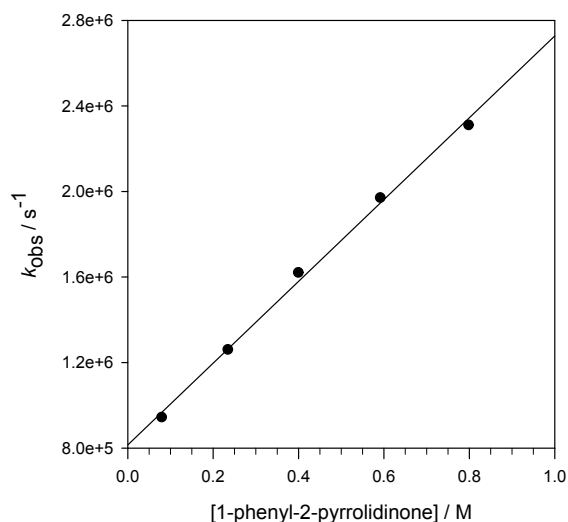

**Figure SI.7.** Plot of the observed rate constant ( $k_{\text{obs}}$ ) against [substrate] for the reaction of 1-phenyl-2-pyrrolidinone (**S7**) with  $\text{CumO}^\bullet$  generated by 355 nm LFP of an Ar-saturated MeCN solution containing 1.0 M dicumyl peroxide measured at  $T = 25^\circ\text{C}$  following the decay of  $\text{CumO}^\bullet$  at 490 nm. From the linear regression analysis: intercept =  $8.15 \times 10^5 \text{ s}^{-1}$ ,  $k_{\text{H}} = 1.91 \times 10^6 \text{ M}^{-1} \text{ s}^{-1}$ ,  $r^2 = 0.9967$ .

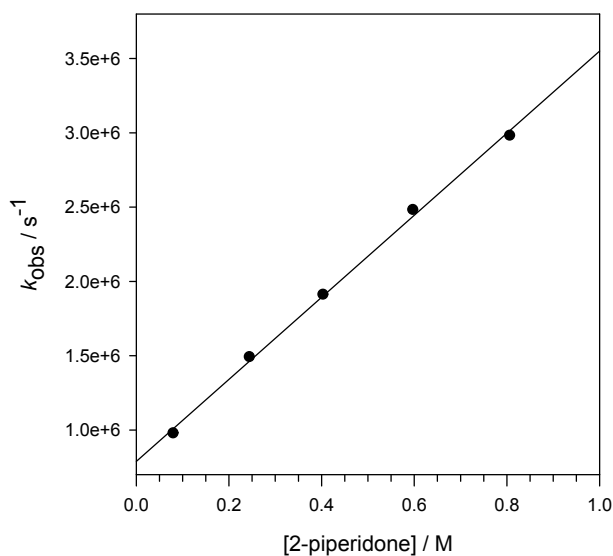

**Figure SI.8.** Plot of the observed rate constant ( $k_{\text{obs}}$ ) against [substrate] for the reaction of 2-piperidinone (**S8**) with  $\text{CumO}^\bullet$  generated by 355 nm LFP of an Ar-saturated MeCN solution containing 1.0 M dicumyl peroxide measured at  $T = 25^\circ\text{C}$  following the decay of  $\text{CumO}^\bullet$  at 490 nm. From the linear regression analysis: intercept =  $7.88 \times 10^5 \text{ s}^{-1}$ ,  $k_{\text{H}} = 2.76 \times 10^6 \text{ M}^{-1} \text{ s}^{-1}$ ,  $r^2 = 0.9981$ .

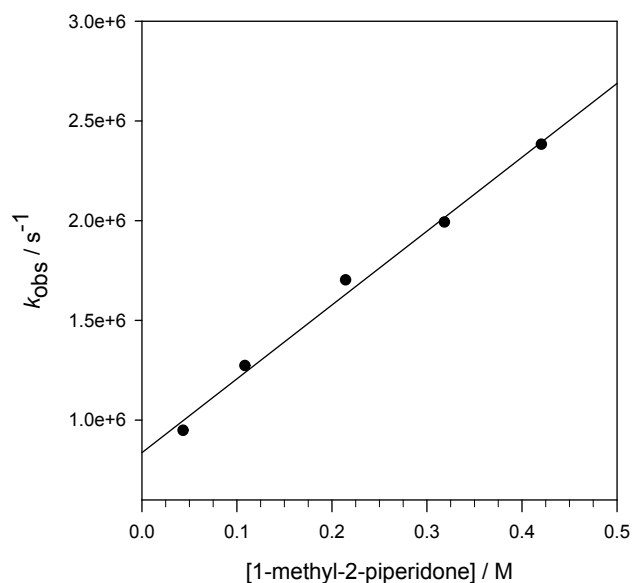

**Figure SI.9.** Plot of the observed rate constant ( $k_{\text{obs}}$ ) against [substrate] for the reaction of 1-methyl-2-piperidinone (S9) with  $\text{CumO}^\bullet$  generated by 355 nm LFP of an Ar-saturated MeCN solution containing 1.0 M dicumyl peroxide measured at  $T = 25^\circ\text{C}$  following the decay of  $\text{CumO}^\bullet$  at 490 nm. From the linear regression analysis: intercept =  $8.37 \times 10^5 \text{ s}^{-1}$ ,  $k_{\text{H}} = 3.70 \times 10^6 \text{ M}^{-1} \text{ s}^{-1}$ ,  $r^2 = 0.9928$ .

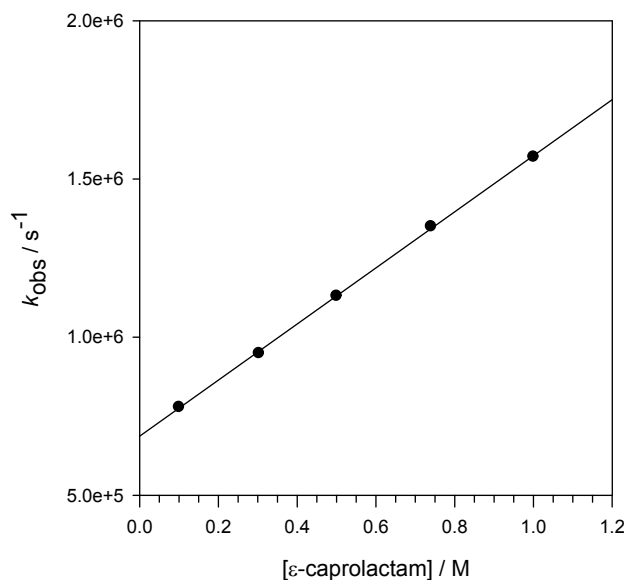

**Figure SI.10.** Plot of the observed rate constant ( $k_{\text{obs}}$ ) against [substrate] for the reaction of  $\epsilon$ -caprolactam (S10) with  $\text{CumO}^\bullet$  generated by 355 nm LFP of an Ar-saturated MeCN solution containing 1.0 M dicumyl peroxide measured at  $T = 25^\circ\text{C}$  following the decay of  $\text{CumO}^\bullet$  at 490 nm. From the linear regression analysis: intercept =  $6.87 \times 10^5 \text{ s}^{-1}$ ,  $k_{\text{H}} = 8.86 \times 10^5 \text{ M}^{-1} \text{ s}^{-1}$ ,  $r^2 = 0.9997$ .

## 2.1b) Absorbance vs. time plots for the reaction of S10 with CumO•

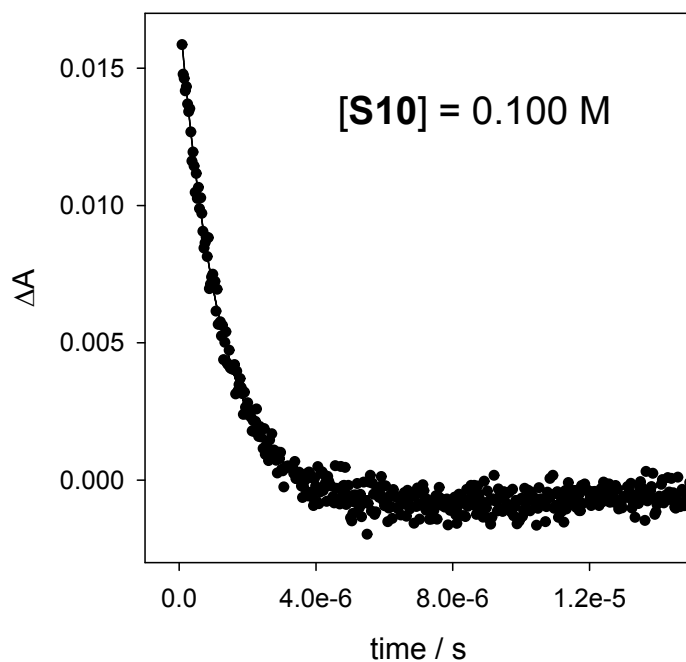

**Figure SI.10-1.** Plot of the change in absorbance ( $\Delta A$ ) monitored at 490 nm vs. time for the reaction of  $\epsilon$ -caprolactam (S10) 0.100 M with CumO• measured in Ar-saturated MeCN solution at  $T = 25\text{ }^\circ\text{C}$ .

### Nonlinear Regression

**Equation: Exponential Decay, Single, 3 Parameter**

$$f = y_0 + a \cdot \exp(-b \cdot x)$$

**R      Rsqr    Adj Rsqr      Standard Error of Estimate**

0.9916   0.9833   0.9833      0.0004

|    | <b>Coefficient</b> | <b>Std. Error</b> | <b>t</b> | <b>P</b> | <b>VIF</b> |
|----|--------------------|-------------------|----------|----------|------------|
| y0 | -0.0008            | 2.2435E-005       | -34.1576 | <0.0001  | 1.4648     |
| a  | 0.0179             | 0.0002            | 119.0124 | <0.0001  | 2.2920     |
| b  | 845254.0020        | 10416.5545        | 81.1453  | <0.0001  | 2.8195     |

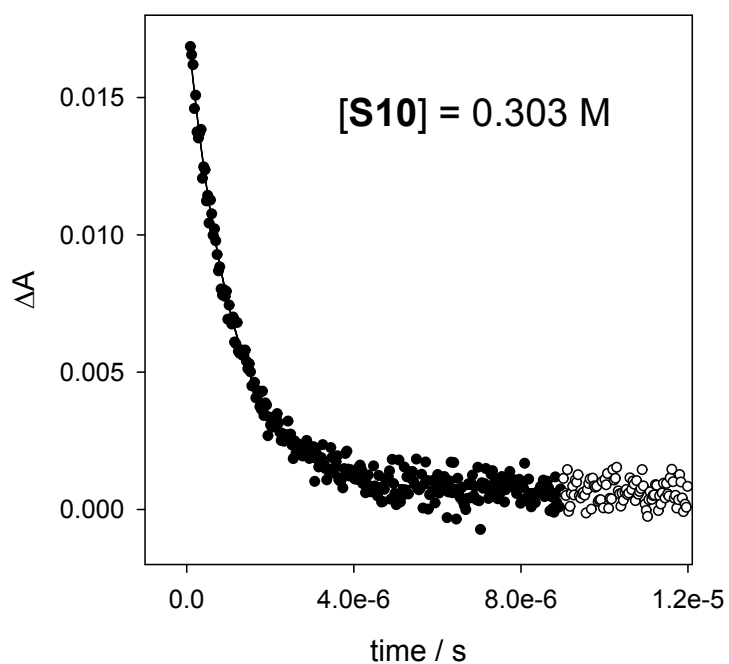

**Figure SI.10-2.** Plot of the change in absorbance ( $\Delta A$ ) monitored at 490 nm vs. time for the reaction of  $\epsilon$ -caprolactam (S10) 0.303 M with  $\text{CumO}^\bullet$  measured in Ar-saturated MeCN solution at  $T = 25^\circ\text{C}$ . The white data points have been excluded from the nonlinear regression analysis.

### Nonlinear Regression

**Equation: Exponential Decay, Single, 3 Parameter**

$$f = y_0 + a \cdot \exp(-b \cdot x)$$

**R      Rsqr    Adj Rsqr      Standard Error of Estimate**

0.9927   0.9855   0.9854      0.0004

|    | <b>Coefficient</b> | <b>Std. Error</b> | <b>t</b> | <b>P</b> | <b>VIF</b> |
|----|--------------------|-------------------|----------|----------|------------|
| y0 | 0.0007             | 3.4330E-005       | 21.2640  | <0.0001  | 1.9123     |
| a  | 0.0172             | 0.0002            | 102.9571 | <0.0001  | 2.3303     |
| b  | 934959.3194        | 14350.4176        | 65.1521  | <0.0001  | 3.3752     |

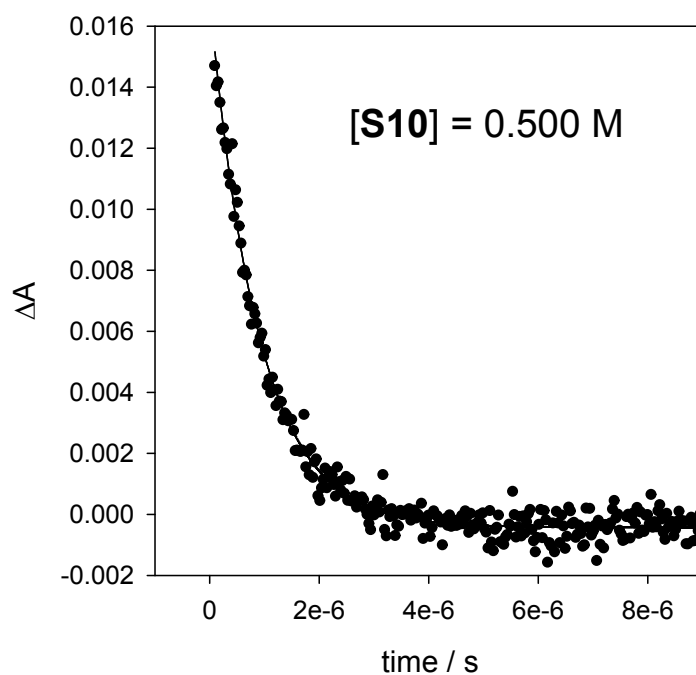

**Figure SI.10-3.** Plot of the change in absorbance ( $\Delta A$ ) monitored at 490 nm vs. time for the reaction of  $\epsilon$ -caprolactam (S10) 0.500 M with  $\text{CumO}^\bullet$  measured in Ar-saturated MeCN solution at  $T = 25^\circ\text{C}$ .

**Nonlinear Regression**

**Equation: Exponential Decay, Single, 3 Parameter**

$$f = y_0 + a \cdot \exp(-b \cdot x)$$

**R      Rsqr    Adj Rsqr      Standard Error of Estimate**

0.9918   0.9836   0.9835      0.0004

|    | <b>Coefficient</b> | <b>Std. Error</b> | <b>t</b> | <b>P</b> | <b>VIF</b> |
|----|--------------------|-------------------|----------|----------|------------|
| y0 | -0.0004            | 3.1768E-005       | -13.4199 | <0.0001  | 1.6620     |
| a  | 0.0174             | 0.0002            | 92.7970  | <0.0001  | 2.4018     |
| b  | 1123698.9191       | 18031.5659        | 62.3184  | <0.0001  | 3.1821     |



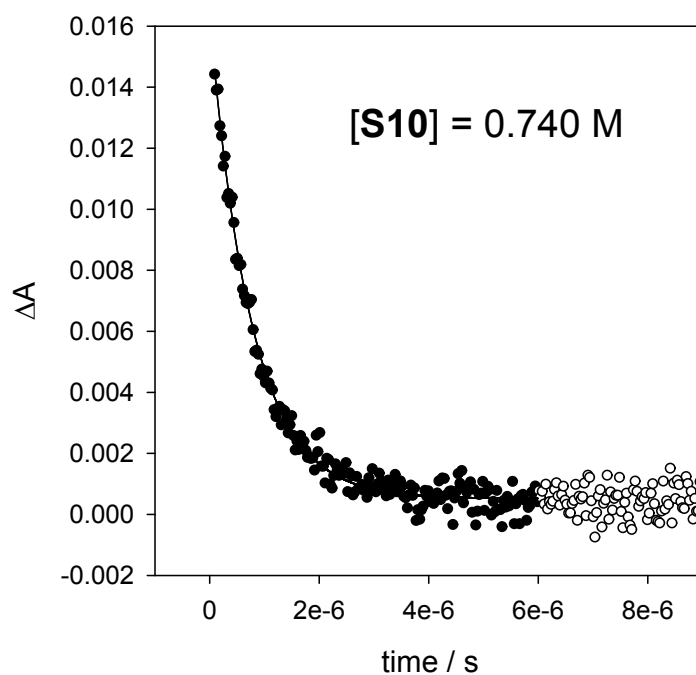

**Figure SI.10-4.** Plot of the change in absorbance ( $\Delta A$ ) monitored at 490 nm vs. time for the reaction of  $\epsilon$ -caprolactam (S10) 0.740 M with  $\text{CumO}^\bullet$  measured in Ar-saturated MeCN solution at  $T = 25^\circ\text{C}$ . The white data points have been excluded from the nonlinear regression analysis.

#### Nonlinear Regression

Equation: Exponential Decay, Single, 3 Parameter

$$f = y_0 + a \cdot \exp(-b \cdot x)$$

**R**      **Rsqr**    **Adj Rsqr**      **Standard Error of Estimate**

0.9931   0.9862   0.9860      0.0004

|    | <b>Coefficient</b> | <b>Std. Error</b> | <b>t</b> | <b>P</b> | <b>VIF</b> |
|----|--------------------|-------------------|----------|----------|------------|
| y0 | 0.0005             | 3.8921E-005       | 13.2621  | <0.0001  | 2.0345     |
| a  | 0.0158             | 0.0002            | 83.7675  | <0.0001  | 2.4880     |
| b  | 1319462.1992       | 24583.9699        | 53.6716  | <0.0001  | 3.7343     |

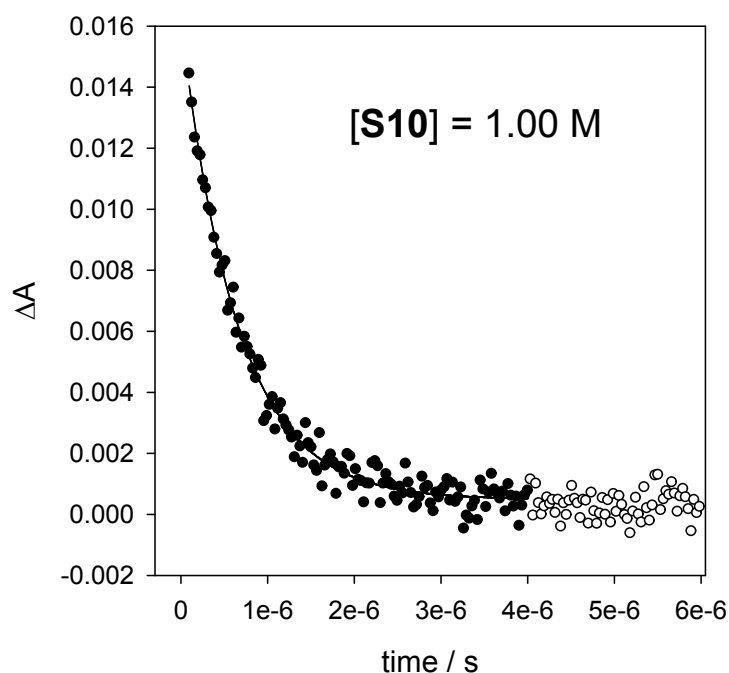

**Figure SI.10-5.** Plot of the change in absorbance ( $\Delta A$ ) monitored at 490 nm vs. time for the reaction of  $\epsilon$ -caprolactam (**S10**) 1.00 M with  $\text{CumO}^\bullet$  measured in Ar-saturated MeCN solution at  $T = 25^\circ\text{C}$ . The white data points have been excluded from the nonlinear regression analysis.

#### Nonlinear Regression

Equation: Exponential Decay, Single, 3 Parameter

$$f = y_0 + a \cdot \exp(-b \cdot x)$$

**R**      **Rsqr**    **Adj Rsqr**      **Standard Error of Estimate**

0.9917   0.9835   0.9832      0.0004

|    | <b>Coefficient</b> | <b>Std. Error</b> | <b>t</b> | <b>P</b> | <b>VIF</b> |
|----|--------------------|-------------------|----------|----------|------------|
| y0 | 0.0005             | 6.4476E-005       | 7.5461   | <0.0001  | 2.7732     |
| a  | 0.0157             | 0.0002            | 64.0085  | <0.0001  | 2.5951     |
| b  | 1538360.5937       | 40746.9335        | 37.7540  | <0.0001  | 4.7545     |

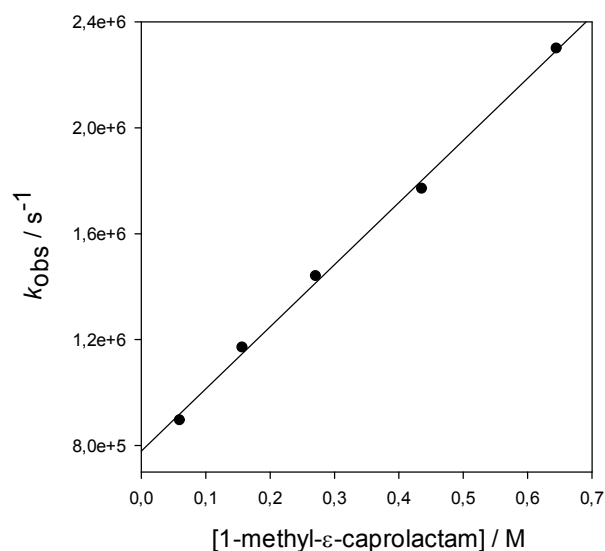

**Figure SI.11.** Plot of the observed rate constant ( $k_{obs}$ ) against [substrate] for the reaction of 1-methyl- $\epsilon$ -caprolactam (S11) with CumO $\bullet$  generated by 355 nm LFP of an Ar-saturated MeCN solution containing 1.0 M dicumyl peroxide measured at T = 25 °C following the decay of CumO $\bullet$  at 490 nm. From the linear regression analysis: intercept =  $7.79 \times 10^5 s^{-1}$ ,  $k_H = 2.35 \times 10^6 M^{-1} s^{-1}$ ,  $r^2 = 0.9976$ .

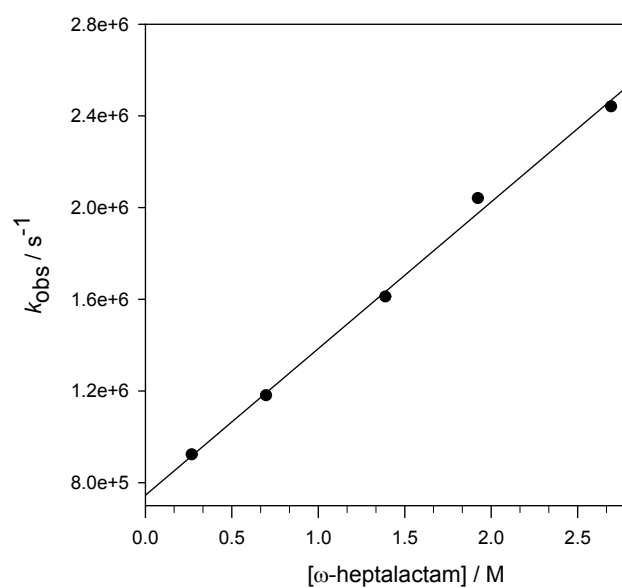

**Figure SI.12.** Plot of the observed rate constant ( $k_{obs}$ ) against [substrate] for the reaction of  $\omega$ -heptalactam (S12) with CumO $\bullet$  generated by 355 nm LFP of an Ar-saturated MeCN solution containing 1.0 M dicumyl peroxide measured at T = 25 °C following the decay of CumO $\bullet$  at 490 nm. From the linear regression analysis: intercept =  $7.45 \times 10^5 s^{-1}$ ,  $k_H = 6.38 \times 10^5 M^{-1} s^{-1}$ ,  $r^2 = 0.9963$ .

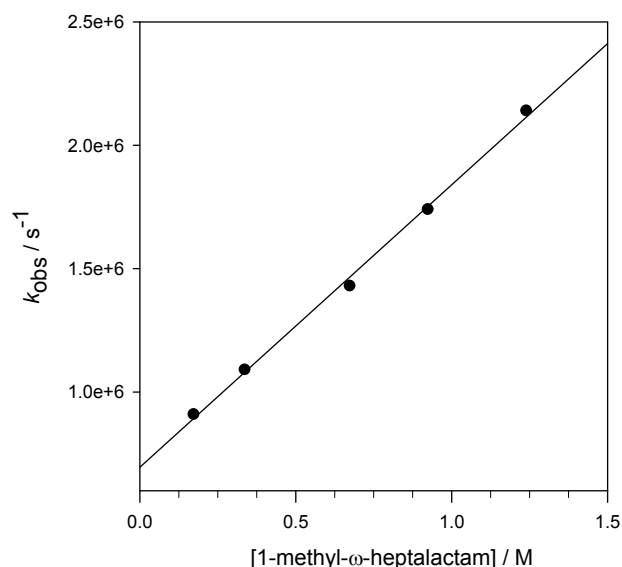

**Figure SI.13.** Plot of the observed rate constant ( $k_{\text{obs}}$ ) against [substrate] for the reaction of 1-methyl- $\omega$ -heptalactam (**S13**) with  $\text{CumO}^\bullet$  generated by 355 nm LFP of an Ar-saturated MeCN solution containing 1.0 M dicumyl peroxide measured at  $T = 25^\circ\text{C}$  following the decay of  $\text{CumO}^\bullet$  at 490 nm. From the linear regression analysis: intercept =  $6.95 \times 10^5 \text{ s}^{-1}$ ,  $k_{\text{H}} = 1.14 \times 10^6 \text{ M}^{-1} \text{ s}^{-1}$ ,  $r^2 = 0.9975$ .

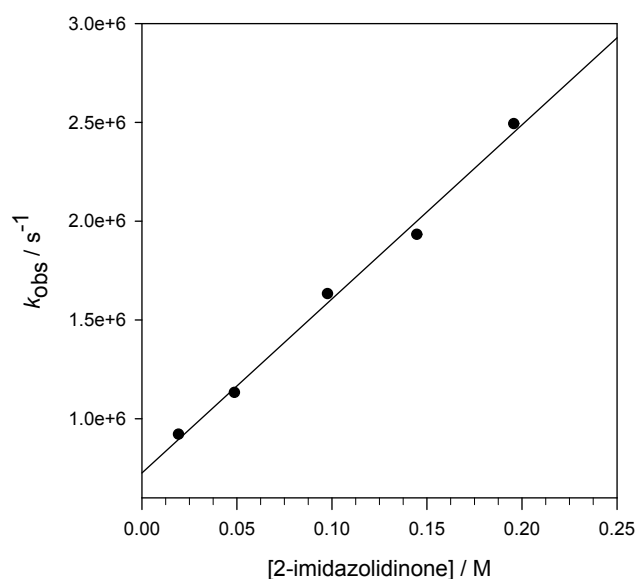

**Figure SI.14A.** Plot of the observed rate constant ( $k_{\text{obs}}$ ) against [substrate] for the reaction of 2-imidazolidinone (**S14**) with  $\text{CumO}^\bullet$  generated by 355 nm LFP of an Ar-saturated MeCN solution containing 1.0 M dicumyl peroxide measured at  $T = 25^\circ\text{C}$  following the decay of  $\text{CumO}^\bullet$  at 490 nm. From the linear regression analysis: intercept =  $7.26 \times 10^5 \text{ s}^{-1}$ ,  $k_{\text{H}} = 8.81 \times 10^6 \text{ M}^{-1} \text{ s}^{-1}$ ,  $r^2 = 0.9939$ .

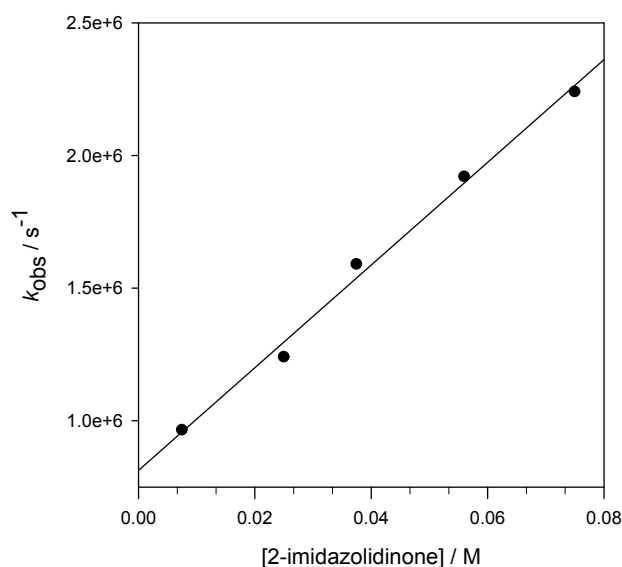

**Figure SI.14B.** Plot of the observed rate constant ( $k_{\text{obs}}$ ) against [substrate] for the reaction of 2-imidazolidinone (**S14**) with  $\text{CumO}^\bullet$  generated by 355 nm LFP of an Ar-saturated DMSO solution containing 1.0 M dicumyl peroxide measured at  $T = 25^\circ\text{C}$  following the decay of  $\text{CumO}^\bullet$  at 490 nm. From the linear regression analysis: intercept =  $8.13 \times 10^5 \text{ s}^{-1}$ ,  $k_{\text{H}} = 1.94 \times 10^7 \text{ M}^{-1} \text{ s}^{-1}$ ,  $r^2 = 0.9933$ .

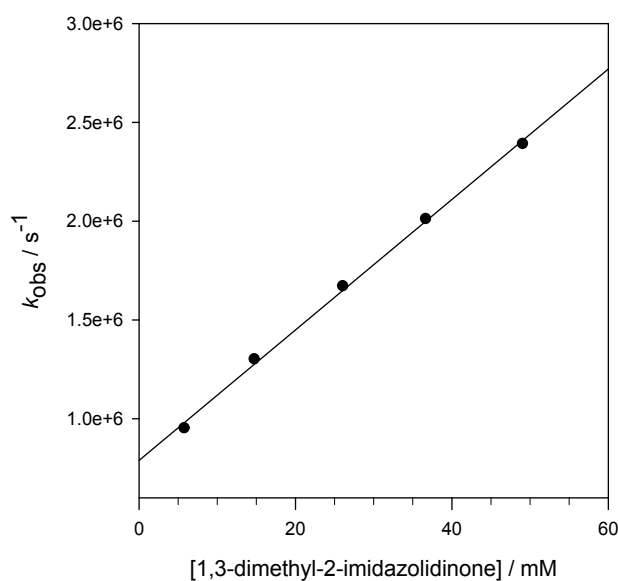

**Figure SI.15A.** Plot of the observed rate constant ( $k_{\text{obs}}$ ) against [substrate] for the reaction of 1,3-dimethyl-2-imidazolidinone (**S15**) with  $\text{CumO}^\bullet$  generated by 355 nm LFP of an Ar-saturated MeCN solution containing 1.0 M dicumyl peroxide measured at  $T = 25^\circ\text{C}$  following the decay of  $\text{CumO}^\bullet$  at 490 nm. From the linear regression analysis: intercept =  $7.89 \times 10^5 \text{ s}^{-1}$ ,  $k_{\text{H}} = 3.30 \times 10^7 \text{ M}^{-1} \text{ s}^{-1}$ ,  $r^2 = 0.9982$ .

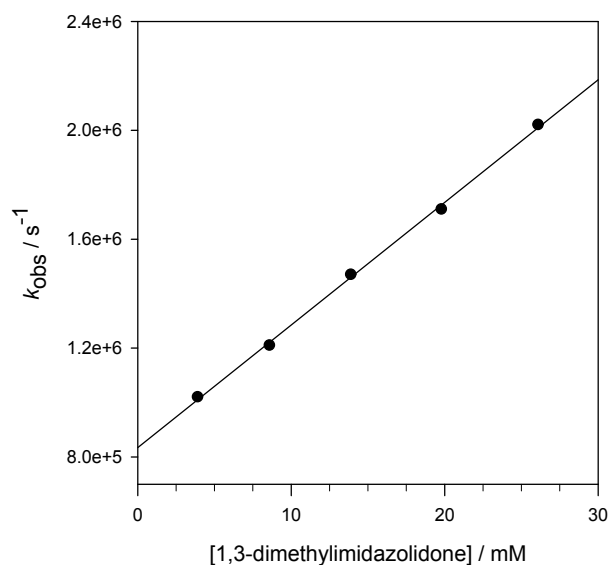

**Figure SI.15B.** Plot of the observed rate constant ( $k_{\text{obs}}$ ) against [substrate] for the reaction of 1,3-dimethyl-2-imidazolidinone (**S15**) with  $\text{CumO}^\bullet$  generated by 355 nm LFP of an Ar-saturated DMSO solution containing 1.0 M dicumyl peroxide measured at  $T = 25^\circ\text{C}$  following the decay of  $\text{CumO}^\bullet$  at 490 nm. From the linear regression analysis: intercept =  $8.35 \times 10^5 \text{ s}^{-1}$ ,  $k_{\text{H}} = 4.50 \times 10^7 \text{ M}^{-1} \text{ s}^{-1}$ ,  $r^2 = 0.9989$ .

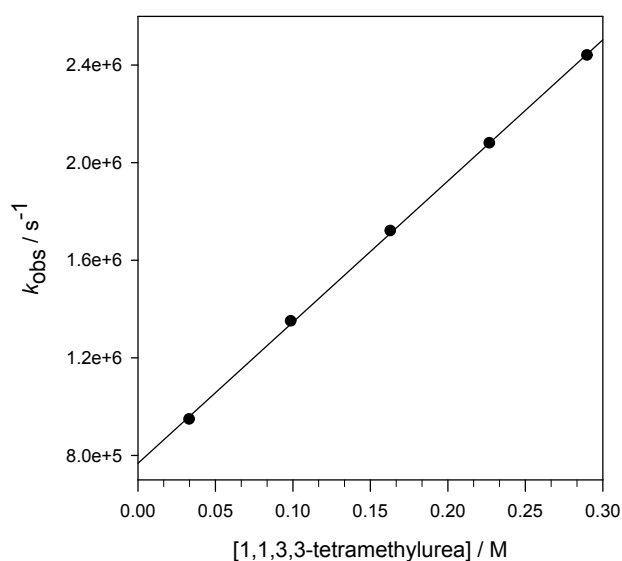

**Figure SI.16.** Plot of the observed rate constant ( $k_{\text{obs}}$ ) against [substrate] for the reaction of 1,1,3,3-tetramethylurea (**S16**) with  $\text{CumO}^\bullet$  generated by 355 nm LFP of an Ar-saturated MeCN solution containing 1.0 M dicumyl peroxide measured at  $T = 25^\circ\text{C}$  following the decay of  $\text{CumO}^\bullet$  at 490 nm. From the linear regression analysis: intercept =  $7.66 \times 10^5 \text{ s}^{-1}$ ,  $k_{\text{H}} = 5.79 \times 10^6 \text{ M}^{-1} \text{ s}^{-1}$ ,  $r^2 = 0.9997$ .

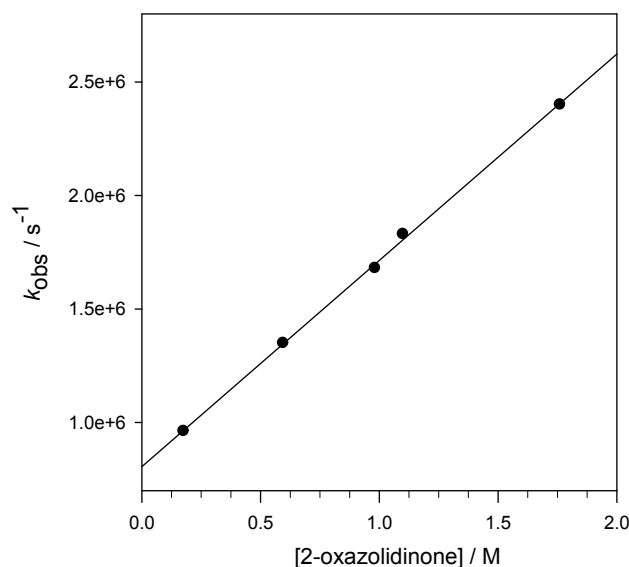

**Figure SI.17.** Plot of the observed rate constant ( $k_{\text{obs}}$ ) against [substrate] for the reaction of 2-oxazolidinone (S17) with  $\text{CumO}^\bullet$  generated by 355 nm LFP of an Ar-saturated MeCN solution containing 1.0 M dicumyl peroxide measured at  $T = 25^\circ\text{C}$  following the decay of  $\text{CumO}^\bullet$  at 490 nm. From the linear regression analysis: intercept =  $8.06 \times 10^5 \text{ s}^{-1}$ ,  $k_{\text{H}} = 9.09 \times 10^5 \text{ M}^{-1} \text{ s}^{-1}$ ,  $r^2 = 0.9991$ .

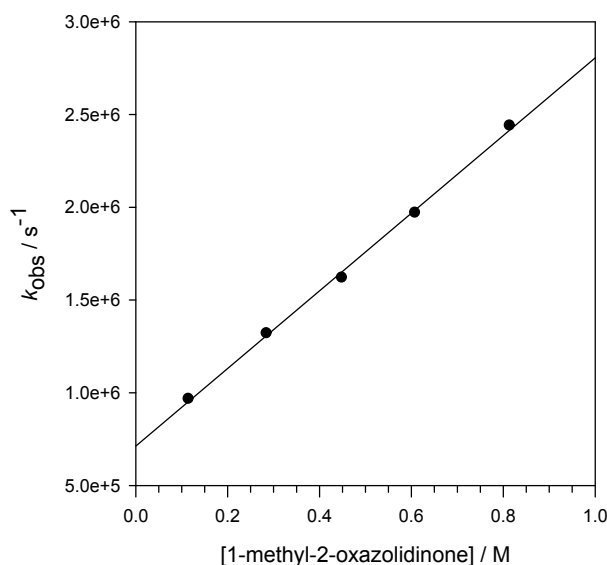

**Figure SI.18.** Plot of the observed rate constant ( $k_{\text{obs}}$ ) against [substrate] for the reaction of 1-methyl-2-oxazolidinone (S18) with  $\text{CumO}^\bullet$  generated by 355 nm LFP of an Ar-saturated MeCN solution containing 1.0 M dicumyl peroxide measured at  $T = 25^\circ\text{C}$  following the decay of  $\text{CumO}^\bullet$  at 490 nm. From the linear regression analysis: intercept =  $7.13 \times 10^5 \text{ s}^{-1}$ ,  $k_{\text{H}} = 2.09 \times 10^6 \text{ M}^{-1} \text{ s}^{-1}$ ,  $r^2 = 0.9984$ .

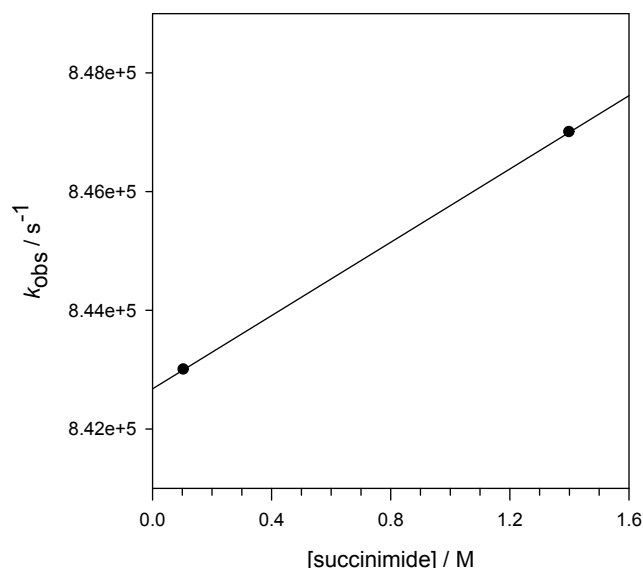

**Figure SI.19.** Plot of the observed rate constant ( $k_{\text{obs}}$ ) against [substrate] for the reaction of succinimide (**S19**) with  $\text{CumO}^\bullet$  generated by 355 nm LFP of an Ar-saturated DMSO solution containing 1.0 M dicumyl peroxide measured at  $T = 25^\circ\text{C}$  following the decay of  $\text{CumO}^\bullet$  at 490 nm. From the linear regression analysis: intercept =  $8.43 \times 10^5 \text{ s}^{-1}$ ,  $k_{\text{H}} = 3.09 \times 10^3 \text{ M}^{-1} \text{ s}^{-1}$ ,  $r^2 = 1$ . Only an upper limit was done:  $k_{\text{H}} < 10^4 \text{ M}^{-1} \text{ s}^{-1}$ .

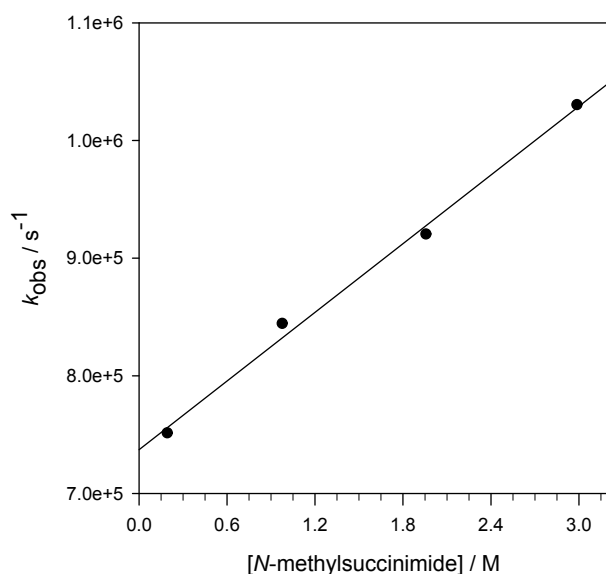

**Figure SI.20.** Plot of the observed rate constant ( $k_{\text{obs}}$ ) against [substrate] for the reaction of *N*-methylsuccinimide (**S20**) with  $\text{CumO}^\bullet$  generated by 355 nm LFP of an Ar-saturated MeCN solution containing 1.0 M dicumyl peroxide measured at  $T = 25^\circ\text{C}$  following the decay of  $\text{CumO}^\bullet$  at 490 nm. From the linear regression analysis: intercept =  $7.37 \times 10^5 \text{ s}^{-1}$ ,  $k_{\text{H}} = 9.73 \times 10^4 \text{ M}^{-1} \text{ s}^{-1}$ ,  $r^2 = 0.9946$ .



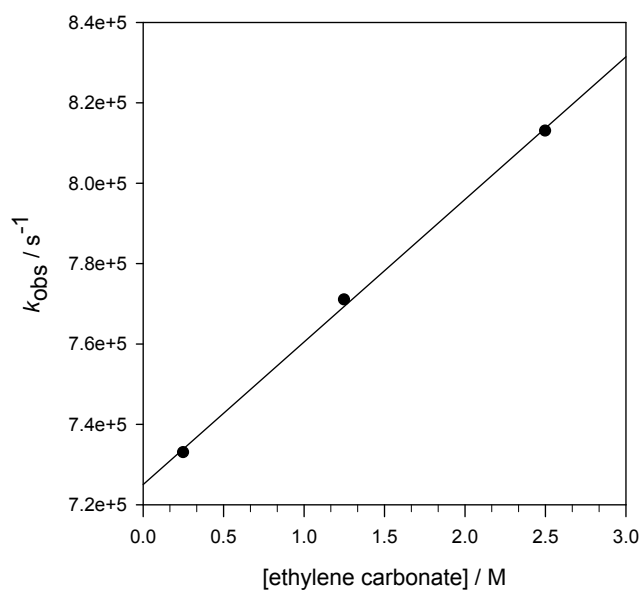

**Figure SI.21.** Plot of the observed rate constant ( $k_{\text{obs}}$ ) against [substrate] for the reaction of ethylene carbonate (S21) with  $\text{CumO}^\bullet$  generated by 355 nm LFP of an Ar-saturated MeCN solution containing 1.0 M dicumyl peroxide measured at  $T = 25^\circ\text{C}$  following the decay of  $\text{CumO}^\bullet$  at 490 nm. From the linear regression analysis: intercept =  $7.25 \times 10^5 \text{ s}^{-1}$ ,  $k_{\text{H}} = 3.55 \times 10^4 \text{ M}^{-1} \text{ s}^{-1}$ ,  $r^2 = 0.9988$ .

## 2.2) Primary kinetic data

**Table SI.1:** Primary kinetic data for the reaction of 2-azetidinone (**S1**) with CumO• generated by 355 nm LFP in MeCN (**Figure SI.1**).

| t / s   | $\Delta A$ 2-azetidinone ( <b>S1</b> ) |         |         |         |
|---------|----------------------------------------|---------|---------|---------|
|         | 0.15M                                  | 0.563M  | 1.125M  | 1.5M    |
| -1E-06  | 0.00072                                | -0.0008 | -0.0002 | -0.0008 |
| -1E-06  | 0.00132                                | -0.0009 | 9.5E-05 | -0.0021 |
| -9E-07  | 0.00066                                | -0.0007 | -0.0012 | -0.0011 |
| -9E-07  | 0.00099                                | -0.0011 | -0.0014 | -0.0015 |
| -9E-07  | 0.00052                                | -0.0015 | -0.0007 | -0.0014 |
| -8E-07  | -6E-05                                 | -0.0003 | -0.0003 | -0.0019 |
| -8E-07  | 0.00045                                | -0.0012 | -0.0014 | -0.0021 |
| -8E-07  | 0.00035                                | -0.0006 | -0.0004 | -0.0017 |
| -7E-07  | 0.00049                                | -0.0007 | -0.0009 | -0.0013 |
| -7E-07  | 0.00064                                | -0.0015 | -0.0012 | -0.0023 |
| -7E-07  | -9E-05                                 | -0.001  | -0.0004 | -0.0016 |
| -6E-07  | 8E-05                                  | -0.0017 | -0.0014 | -0.0019 |
| -6E-07  | 0.00052                                | -0.0008 | -0.0011 | -0.002  |
| -6E-07  | -0.0002                                | -0.0009 | -0.0004 | -0.0013 |
| -5E-07  | -0.0006                                | -0.001  | -0.0005 | -0.0018 |
| -5E-07  | 0.00069                                | -0.0006 | -0.0011 | -0.0013 |
| -5E-07  | 0.00058                                | -0.0008 | -0.0012 | -0.0014 |
| -4E-07  | 0.00032                                | -8E-05  | -0.0008 | -0.0014 |
| -4E-07  | -0.0002                                | 0.00018 | -0.0013 | -0.0016 |
| -4E-07  | 0.00076                                | -7E-05  | -0.0003 | -0.0009 |
| -4E-07  | 0.00068                                | -0.0007 | -0.0004 | -0.0005 |
| -3E-07  | 0.00084                                | -0.0004 | -0.0006 | -0.0014 |
| -3E-07  | 0.00074                                | -0.0007 | -0.0014 | -0.0021 |
| -3E-07  | 0.00059                                | -5E-06  | -0.0006 | -0.0028 |
| -2E-07  | 0.00057                                | -0.0004 | -6E-05  | -0.0013 |
| -2E-07  | -9E-05                                 | -0.0004 | -0.0011 | -0.0007 |
| -2E-07  | 0.00014                                | -0.0003 | -0.0006 | -0.0021 |
| -1E-07  | -8E-05                                 | -0.0004 | -0.0002 | -0.0009 |
| -1E-07  | -0.0003                                | -0.001  | -0.0016 | -0.001  |
| -6E-08  | 0.00151                                | -0.0007 | -0.0007 | -0.0008 |
| -3E-08  | 0.00092                                | -0.0002 | -0.0011 | -0.0015 |
| -3E-10  | -0.0024                                | -0.004  | -0.0043 | -0.0057 |
| 3.2E-08 | -0.0107                                | -0.013  | -0.0157 | -0.0154 |
| 6.4E-08 | 0.01397                                | 0.01475 | 0.01404 | 0.01337 |
| 9.6E-08 | 0.015                                  | 0.01693 | 0.01901 | 0.01952 |
| 1.3E-07 | 0.01519                                | 0.01593 | 0.01771 | 0.01818 |
| 1.6E-07 | 0.01373                                | 0.01508 | 0.01676 | 0.01657 |
| 1.9E-07 | 0.01396                                | 0.01528 | 0.01544 | 0.01519 |
| 2.2E-07 | 0.01389                                | 0.01549 | 0.01499 | 0.01459 |
| 2.6E-07 | 0.01343                                | 0.01287 | 0.01412 | 0.01392 |
| 2.9E-07 | 0.01346                                | 0.01372 | 0.01378 | 0.01261 |
| 3.2E-07 | 0.01372                                | 0.01374 | 0.01281 | 0.01141 |
| 3.5E-07 | 0.01303                                | 0.01252 | 0.01248 | 0.01125 |
| 3.8E-07 | 0.0117                                 | 0.01117 | 0.01219 | 0.01072 |
| 4.2E-07 | 0.01124                                | 0.01194 | 0.01184 | 0.01026 |
| 4.5E-07 | 0.01218                                | 0.01132 | 0.01165 | 0.01011 |
| 4.8E-07 | 0.01169                                | 0.01035 | 0.01134 | 0.00954 |

|         |         |         |         |         |
|---------|---------|---------|---------|---------|
| 5.1E-07 | 0.0112  | 0.00988 | 0.00996 | 0.008   |
| 5.4E-07 | 0.01062 | 0.01038 | 0.01002 | 0.00861 |
| 5.8E-07 | 0.01146 | 0.01007 | 0.01022 | 0.00788 |
| 6.1E-07 | 0.01065 | 0.00925 | 0.00985 | 0.00752 |
| 6.4E-07 | 0.01054 | 0.00887 | 0.00934 | 0.00869 |
| 6.7E-07 | 0.0101  | 0.00916 | 0.00887 | 0.00792 |
| 7E-07   | 0.00971 | 0.00868 | 0.00838 | 0.0074  |
| 7.4E-07 | 0.0099  | 0.00845 | 0.00796 | 0.00766 |
| 7.7E-07 | 0.00946 | 0.00829 | 0.00779 | 0.00771 |
| 8E-07   | 0.00917 | 0.00734 | 0.0079  | 0.00731 |
| 8.3E-07 | 0.00892 | 0.00753 | 0.00775 | 0.00646 |
| 8.6E-07 | 0.00841 | 0.00732 | 0.00757 | 0.00558 |
| 9E-07   | 0.0085  | 0.00708 | 0.00763 | 0.00617 |
| 9.3E-07 | 0.00814 | 0.00755 | 0.00651 | 0.00572 |
| 9.6E-07 | 0.00791 | 0.00698 | 0.00809 | 0.00635 |
| 9.9E-07 | 0.00836 | 0.00711 | 0.00725 | 0.00649 |
| 1E-06   | 0.00815 | 0.00759 | 0.00653 | 0.00488 |
| 1.1E-06 | 0.00801 | 0.00647 | 0.00633 | 0.00427 |
| 1.1E-06 | 0.00814 | 0.00618 | 0.00649 | 0.00495 |
| 1.1E-06 | 0.00724 | 0.00684 | 0.00615 | 0.00572 |
| 1.2E-06 | 0.00748 | 0.00718 | 0.00593 | 0.00539 |
| 1.2E-06 | 0.00743 | 0.00628 | 0.00576 | 0.00419 |
| 1.2E-06 | 0.00726 | 0.00549 | 0.00585 | 0.00515 |
| 1.2E-06 | 0.00679 | 0.00572 | 0.00447 | 0.0039  |
| 1.3E-06 | 0.00715 | 0.00587 | 0.00467 | 0.00355 |
| 1.3E-06 | 0.00623 | 0.00601 | 0.00603 | 0.00385 |
| 1.3E-06 | 0.00691 | 0.00533 | 0.0056  | 0.00461 |
| 1.4E-06 | 0.00645 | 0.00543 | 0.00541 | 0.00499 |
| 1.4E-06 | 0.00626 | 0.0053  | 0.0049  | 0.00424 |
| 1.4E-06 | 0.00615 | 0.00501 | 0.00554 | 0.00438 |
| 1.5E-06 | 0.00645 | 0.00555 | 0.0046  | 0.00357 |
| 1.5E-06 | 0.00625 | 0.00482 | 0.00523 | 0.00316 |
| 1.5E-06 | 0.00609 | 0.00456 | 0.00326 | 0.0034  |
| 1.6E-06 | 0.0059  | 0.00459 | 0.0048  | 0.00367 |
| 1.6E-06 | 0.00604 | 0.00342 | 0.00458 | 0.00293 |
| 1.6E-06 | 0.00617 | 0.0049  | 0.00474 | 0.00351 |
| 1.7E-06 | 0.00598 | 0.00518 | 0.00481 | 0.00284 |
| 1.7E-06 | 0.00562 | 0.00459 | 0.00361 | 0.00353 |
| 1.7E-06 | 0.0051  | 0.00454 | 0.00445 | 0.0019  |
| 1.8E-06 | 0.0052  | 0.00362 | 0.00428 | 0.00321 |
| 1.8E-06 | 0.00548 | 0.00352 | 0.00386 | 0.00326 |
| 1.8E-06 | 0.00536 | 0.00367 | 0.00396 | 0.00283 |
| 1.9E-06 | 0.00514 | 0.00361 | 0.00289 | 0.00229 |
| 1.9E-06 | 0.0047  | 0.00425 | 0.00284 | 0.00091 |
| 1.9E-06 | 0.00488 | 0.0037  | 0.00214 | 0.00291 |
| 2E-06   | 0.00463 | 0.00386 | 0.00337 | 0.00227 |
| 2E-06   | 0.00474 | 0.00364 | 0.00262 | 0.0024  |
| 2E-06   | 0.00456 | 0.00313 | 0.00346 | 0.00238 |
| 2E-06   | 0.00529 | 0.00419 | 0.00291 | 0.00247 |
| 2.1E-06 | 0.00494 | 0.00305 | 0.00229 | 0.00212 |
| 2.1E-06 | 0.00448 | 0.00332 | 0.00385 | 0.00225 |
| 2.1E-06 | 0.00442 | 0.00295 | 0.00313 | 0.00224 |
| 2.2E-06 | 0.00452 | 0.00292 | 0.00341 | 0.00231 |
| 2.2E-06 | 0.00417 | 0.00304 | 0.00257 | 0.00181 |

|         |         |         |         |         |
|---------|---------|---------|---------|---------|
| 2.2E-06 | 0.00412 | 0.00264 | 0.00342 | 0.00139 |
| 2.3E-06 | 0.00428 | 0.00257 | 0.00309 | 0.00155 |
| 2.3E-06 | 0.0043  | 0.00331 | 0.00315 | 0.00055 |
| 2.3E-06 | 0.00385 | 0.00298 | 0.00312 | 0.00273 |
| 2.4E-06 | 0.00425 | 0.00199 | 0.0026  | 0.00216 |
| 2.4E-06 | 0.00412 | 0.00205 | 0.00292 | 0.00212 |
| 2.4E-06 | 0.00419 | 0.00287 | 0.00305 | 0.00139 |
| 2.5E-06 | 0.00353 | 0.00251 | 0.00257 | 0.00104 |
| 2.5E-06 | 0.00343 | 0.00324 | 0.00253 | 0.00254 |
| 2.5E-06 | 0.00472 | 0.00217 | 0.00213 | 0.00097 |
| 2.6E-06 | 0.00342 | 0.00155 | 0.00276 | 0.00147 |
| 2.6E-06 | 0.00416 | 0.00274 | 0.00314 | 0.00138 |
| 2.6E-06 | 0.00349 | 0.00289 | 0.00229 | 0.00048 |
| 2.7E-06 | 0.00345 | 0.00185 | 0.00284 | 0.002   |
| 2.7E-06 | 0.00327 | 0.00248 | 0.00171 | 0.00131 |
| 2.7E-06 | 0.00316 | 0.00166 | 0.00246 | 0.00127 |
| 2.8E-06 | 0.00258 | 0.00263 | 0.00257 | 0.00133 |
| 2.8E-06 | 0.0035  | 0.00264 | 0.00266 | 0.0007  |
| 2.8E-06 | 0.00386 | 0.00173 | 0.00253 | 0.00171 |
| 2.8E-06 | 0.00298 | 0.00236 | 0.00179 | 0.00084 |
| 2.9E-06 | 0.00307 | 0.00236 | 0.0022  | 0.00156 |
| 2.9E-06 | 0.00383 | 0.00246 | 0.00167 | 0.00111 |
| 2.9E-06 | 0.00296 | 0.00227 | 0.00243 | 0.00129 |
| 3E-06   | 0.00327 | 0.00134 | 0.00244 | 0.00184 |
| 3E-06   | 0.00306 | 0.00197 | 0.00114 | 0.00134 |
| 3E-06   | 0.00365 | 0.00231 | 0.00223 | 0.00162 |
| 3.1E-06 | 0.00299 | 0.00189 | 0.00317 | 0.00064 |
| 3.1E-06 | 0.0027  | 0.00122 | 0.00284 | 0.00209 |
| 3.1E-06 | 0.00269 | 0.00152 | 0.00198 | 0.00042 |
| 3.2E-06 | 0.00321 | 0.00158 | 0.0025  | 0.00145 |
| 3.2E-06 | 0.00241 | 0.00178 | 0.00124 | 0.00079 |
| 3.2E-06 | 0.00218 | 0.00221 | 0.00258 | 0.00011 |
| 3.3E-06 | 0.00191 | 0.00099 | 0.00236 | 0.00087 |
| 3.3E-06 | 0.00248 | 0.00156 | 0.00185 | 0.00081 |
| 3.3E-06 | 0.00268 | 0.00184 | 0.00239 | 0.00038 |
| 3.4E-06 | 0.00235 | 0.00132 | 0.00199 | 0.00063 |
| 3.4E-06 | 0.00244 | 0.00119 | 0.00236 | 0.00126 |
| 3.4E-06 | 0.00237 | 0.00158 | 0.00242 | 0.00062 |
| 3.5E-06 | 0.0034  | 0.00215 | 0.001   | 0.0011  |
| 3.5E-06 | 0.00257 | 0.00122 | 0.00147 | 0.00088 |
| 3.5E-06 | 0.00256 | 0.00155 | 0.00099 | 0.00099 |
| 3.6E-06 | 0.00254 | 0.00141 | 0.00113 | 0.00048 |
| 3.6E-06 | 0.00185 | 0.00043 | 0.00262 | 0.00075 |
| 3.6E-06 | 0.00204 | 0.00163 | 0.00154 | 0.00138 |
| 3.6E-06 | 0.00275 | 0.00174 | 0.00204 | 0.00023 |
| 3.7E-06 | 0.00224 | 0.00091 | 0.00239 | 0.00115 |
| 3.7E-06 | 0.00254 | 0.00089 | 0.00216 | 0.00141 |
| 3.7E-06 | 0.00218 | 0.00162 | 0.00156 | 0.00085 |
| 3.8E-06 | 0.00255 | 0.00089 | 0.00088 | 0.00135 |
| 3.8E-06 | 0.00195 | 0.00196 | 0.00104 | 0.00034 |
| 3.8E-06 | 0.00237 | 0.00206 | 0.00106 | 0.00033 |
| 3.9E-06 | 0.00201 | 0.0017  | 0.00032 | 0.00053 |
| 3.9E-06 | 0.00232 | 0.00074 | 0.00123 | -3E-05  |
| 3.9E-06 | 0.00247 | 0.00124 | 0.0014  | 0.00134 |

|         |         |         |         |         |
|---------|---------|---------|---------|---------|
| 4E-06   | 0.00208 | 0.00193 | 0.00117 | -0.0002 |
| 4E-06   | 0.00269 | 0.00111 | 0.00035 | 0.00058 |
| 4E-06   | 0.00259 | 0.00144 | 0.00174 | 0.00077 |
| 4.1E-06 | 0.00254 | 0.00129 | 0.00163 | -0.0002 |
| 4.1E-06 | 0.0018  | 0.00153 | 0.00098 | 4E-05   |
| 4.1E-06 | 0.00155 | 0.00104 | 0.00074 | -0.0002 |
| 4.2E-06 | 0.00155 | 0.00054 | 0.00199 | 8E-05   |
| 4.2E-06 | 0.00159 | 0.00138 | 0.00218 | 0.00036 |
| 4.2E-06 | 0.00151 | 0.00028 | 0.00152 | 0.00036 |
| 4.3E-06 | 0.00193 | 0.00118 | 0.00102 | -0.0003 |
| 4.3E-06 | 0.00175 | 0.001   | 0.0014  | -5E-05  |
| 4.3E-06 | 0.00161 | 0.00057 | 0.00204 | 0.00015 |
| 4.4E-06 | 0.00101 | 0.00149 | 0.00109 | -0.0001 |
| 4.4E-06 | 0.00134 | 0.00067 | 0.00073 | -0.0003 |
| 4.4E-06 | 0.00163 | 0.00119 | 0.00104 | -0.0002 |
| 4.4E-06 | 0.00177 | 0.00096 | 0.00135 | 0.00129 |
| 4.5E-06 | 0.00182 | -1E-04  | 0.00166 | 0.00036 |
| 4.5E-06 | 0.00148 | 0.00053 | 0.00132 | 0.00054 |
| 4.5E-06 | 0.0017  | 0.00095 | 0.0013  | -0.0005 |
| 4.6E-06 | 0.00145 | 0.00013 | 0.00106 | 0.00073 |
| 4.6E-06 | 0.00122 | 0.00081 | 0.00118 | 0.00166 |
| 4.6E-06 | 0.00149 | 0.00038 | 0.00124 | 0.00031 |
| 4.7E-06 | 0.00158 | 0.00073 | 0.00087 | -0.0004 |
| 4.7E-06 | 0.00158 | 0.00099 | 0.00151 | -0.001  |
| 4.7E-06 | 0.00105 | 0.0012  | 0.00072 | 0.00024 |
| 4.8E-06 | 0.00119 | 0.00082 | 0.00033 | 0.00064 |
| 4.8E-06 | 0.00158 | 0.00071 | 0.00106 | 0.00011 |
| 4.8E-06 | 0.0014  | 0.00086 | 0.00093 | 0.00051 |
| 4.9E-06 | 0.00142 | 0.00028 | 0.00039 | 0.00042 |
| 4.9E-06 | 0.00215 | 0.00068 | 0.00076 | 0.00051 |
| 4.9E-06 | 0.00147 | 0.00148 | 0.00101 | -0.0005 |
| 5E-06   | 0.00127 | 0.00039 | 0.00158 | 0.00021 |
| 5E-06   | 0.00171 | 0.00097 | 0.00115 | -6E-05  |
| 5E-06   | 0.00215 | 0.00091 | 0.00124 | -0.0007 |
| 5.1E-06 | 0.00093 | 0.00096 | 0.00012 | -0.0004 |
| 5.1E-06 | 0.00117 | 0.00123 | 0.0002  | 0.00093 |
| 5.1E-06 | 0.001   | 0.00061 | 0.00059 | 0.00027 |
| 5.2E-06 | 0.00232 | 0.00103 | 0.00111 | -3E-05  |
| 5.2E-06 | 0.001   | 0.00036 | 0.00028 | 0.0003  |
| 5.2E-06 | 0.00154 | 0.00012 | 0.00041 | -0.0001 |
| 5.2E-06 | 0.00193 | 0.00039 | 0.00127 | 4.6E-05 |
| 5.3E-06 | 0.00126 | 0.00165 | 0.0012  | 0.00016 |
| 5.3E-06 | 0.00201 | 0.00104 | 0.00143 | -1E-04  |
| 5.3E-06 | 0.00134 | 0.00033 | 0.00099 | 0.0002  |
| 5.4E-06 | 0.0014  | 0.00065 | 0.00097 | 4.6E-05 |
| 5.4E-06 | 0.00107 | -0.0007 | 0.00149 | 0.00035 |
| 5.4E-06 | 0.00048 | 0.00053 | 0.00109 | -0.0003 |
| 5.5E-06 | 0.00152 | 0.001   | 0.00071 | -0.0002 |
| 5.5E-06 | 0.00094 | 0.00142 | 0.00164 | 0.00048 |
| 5.5E-06 | 0.00118 | 0.00052 | 0.0002  | 0.00034 |
| 5.6E-06 | 0.00121 | 0.00023 | 0.00029 | 1.1E-05 |
| 5.6E-06 | 0.00156 | 0.00114 | 0.00134 | 0.00066 |
| 5.6E-06 | 0.00174 | 2.2E-05 | 0.00133 | -0.0003 |
| 5.7E-06 | 0.00162 | 0.00041 | 0.00055 | 0.0005  |

|         |         |         |         |         |
|---------|---------|---------|---------|---------|
| 5.7E-06 | 0.00182 | 0.0001  | 0.00106 | -9E-05  |
| 5.7E-06 | 0.00147 | 0.00155 | -9E-05  | -0.0005 |
| 5.8E-06 | 0.00091 | 0.00073 | 0.00021 | -0.0005 |
| 5.8E-06 | 0.00167 | 0.00041 | 0.00074 | -0.0009 |
| 5.8E-06 | 0.00172 | -0.0007 | 0.00011 | 0.00018 |
| 5.9E-06 | 0.00127 | 0.00048 | 0.0011  | 0.00127 |
| 5.9E-06 | 0.00177 | 0.00047 | 0.00057 | 0.00057 |
| 5.9E-06 | 0.00151 | 2.4E-05 | 0.00067 | 0.00059 |
| 6E-06   | 0.00174 | 0.00096 | -0.0003 | 2.5E-05 |
| 6E-06   | 0.00089 | 0.0005  | 0.00081 | 0.00012 |
| 6E-06   | 0.00127 | 0.00024 | 0.00144 | 0.00022 |
| 6E-06   | 0.00106 | 0.00052 | 0.00015 | 0.00012 |
| 6.1E-06 | 0.00094 | 0.00067 | 0.00038 | 0.00041 |
| 6.1E-06 | 0.00178 | 0.0011  | 0.00044 | 6.3E-05 |
| 6.1E-06 | 0.00151 | 0.00019 | 0.00052 | 0.00086 |
| 6.2E-06 | 0.00117 | 0.0004  | 0.00073 | 0.00018 |
| 6.2E-06 | 0.00123 | 0.00051 | 0.00134 | 0.00024 |
| 6.2E-06 | 0.00134 | -0.0001 | 0.00118 | 0.00025 |
| 6.3E-06 | 0.00188 | 0.00048 | 0.00084 | -0.0007 |
| 6.3E-06 | 0.00191 | 0.00097 | 0.00145 | -7E-05  |
| 6.3E-06 | 0.00182 | 0.00017 | 0.00133 | -0.0011 |
| 6.4E-06 | 0.00178 | 0.00062 | 0.00033 | 0.00026 |
| 6.4E-06 | 0.00125 | -0.0001 | 0.00018 | -0.0002 |
| 6.4E-06 | 0.00095 | -0.0005 | 0.00055 | -4E-05  |
| 6.5E-06 | 0.00149 | 0.00041 | 0.00075 | 0.00032 |
| 6.5E-06 | 0.00159 | 0.00077 | 0.00121 | -0.0004 |
| 6.5E-06 | 0.00172 | 9.4E-05 | 0.00042 | 0.0001  |
| 6.6E-06 | 0.00159 | 0.00044 | 0.00068 | -0.0002 |
| 6.6E-06 | 0.0016  | 0.00051 | 0.00124 | -0.0007 |
| 6.6E-06 | 0.00127 | 0.00088 | -0.0003 | 0.00019 |
| 6.7E-06 | 0.00137 | 0.00026 | 0.00138 | 9.5E-05 |
| 6.7E-06 | 0.00143 | -0.0004 | 0.00039 | -0.0008 |
| 6.7E-06 | 0.00115 | -8E-05  | 0.00113 | 1.1E-05 |
| 6.8E-06 | 0.00152 | -0.0006 | 0.00039 | -0.0003 |
| 6.8E-06 | 0.0013  | 0.00078 | 0.00152 | 0.00047 |
| 6.8E-06 | 0.00109 | 0.00075 | -0.0001 | 0.0001  |
| 6.8E-06 | 0.00125 | 0.00089 | 0.00075 | 0.00013 |
| 6.9E-06 | 0.00136 | 0.00129 | -0.0001 | 0.00081 |
| 6.9E-06 | 0.00182 | 0.00044 | -7E-05  | 0.00056 |
| 6.9E-06 | 0.00172 | 0.00043 | 0.00011 | 0.00088 |
| 7E-06   | 0.00094 | 0.00086 | 0.00096 | 0.0007  |
| 7E-06   | 0.00134 | -0.0002 | 0.00023 | 0.0005  |
| 7E-06   | 0.00147 | 0.00035 | -0.0005 | -0.0003 |
| 7.1E-06 | 0.00166 | 0.00067 | -0.0009 | -0.001  |
| 7.1E-06 | 0.00118 | -1E-05  | 0.00057 | 0.00074 |
| 7.1E-06 | 0.002   | 0.00045 | 0.00032 | -0.0003 |
| 7.2E-06 | 0.0018  | 0.00128 | 0.00056 | 0.00083 |
| 7.2E-06 | 0.00079 | 0.00099 | 0.00109 | 0.00027 |
| 7.2E-06 | 0.00158 | -0.0001 | 0.00039 | 0.00036 |
| 7.3E-06 | 0.00184 | 0.00084 | 0.00123 | 0.00016 |
| 7.3E-06 | 0.00127 | -0.0001 | 0.00023 | 8.5E-05 |
| 7.3E-06 | 0.0015  | 0.00047 | 0.00063 | 0.00039 |
| 7.4E-06 | 0.00219 | 0.0006  | 0.00099 | 0.00072 |
| 7.4E-06 | 0.00099 | 0.00073 | 0.00036 | 0.00028 |

|         |         |         |         |         |
|---------|---------|---------|---------|---------|
| 7.4E-06 | 0.00107 | 0.00063 | 0.00147 | -0.0002 |
| 7.5E-06 | 0.00164 | -0.0002 | 0.00023 | 0.00054 |
| 7.5E-06 | 0.00181 | -0.0003 | 0.00097 | -0.0002 |
| 7.5E-06 | 0.00131 | 0.00073 | 0.00053 | 0.00043 |
| 7.6E-06 | 0.00168 | -0.0004 | -5E-05  | 0.00051 |
| 7.6E-06 | 0.00219 | -9E-05  | 0.00074 | 0.00025 |
| 7.6E-06 | 0.00062 | 0.0005  | 0.00045 | -0.0001 |
| 7.6E-06 | 0.00127 | 0.00013 | 0.00084 | -0.0004 |
| 7.7E-06 | 0.001   | 0.00048 | 0.00047 | 0.00035 |
| 7.7E-06 | 0.002   | 0.00035 | -0.0001 | -0.0004 |
| 7.7E-06 | 0.00111 | 3.8E-05 | 0.00103 | 0.00084 |
| 7.8E-06 | 0.00163 | -0.0004 | 0.00032 | -0.0007 |
| 7.8E-06 | 0.00134 | 0.00078 | 0.00071 | -0.0009 |
| 7.8E-06 | 0.00115 | 8.5E-05 | 0.00156 | -0.0005 |
| 7.9E-06 | 0.00115 | 0.00071 | 0.00029 | -0.0011 |
| 7.9E-06 | 0.00135 | 0.00035 | 0.00023 | 0.00098 |
| 7.9E-06 | 0.00154 | 5.3E-06 | -8E-05  | -0.0008 |
| 8E-06   | 0.00076 | -3E-05  | 0.00049 | -0.0003 |
| 8E-06   | 0.00121 | 0.0006  | 0.00101 | -0.0001 |
| 8E-06   | 0.00072 | 0.00112 | 0.00078 | -0.0007 |
| 8.1E-06 | 0.00136 | 0.0008  | 0.0005  | -0.0005 |
| 8.1E-06 | 0.00092 | 0.00026 | 0.00078 | -1E-05  |
| 8.1E-06 | 0.00122 | -0.0003 | -4E-05  | -0.0009 |
| 8.2E-06 | 0.00106 | -6E-05  | -0.0004 | -0.0009 |
| 8.2E-06 | 0.00129 | 0.00069 | -0.0002 | -3E-05  |
| 8.2E-06 | 0.00136 | 0.00049 | 0.00067 | 0.0001  |
| 8.3E-06 | 0.00113 | 0.00021 | -0.0002 | -0.0004 |
| 8.3E-06 | 0.00154 | -0.0002 | 0.00069 | 0.00017 |
| 8.3E-06 | 0.00137 | 0.00033 | -0.0001 | -0.0005 |
| 8.4E-06 | 0.00127 | 0.00041 | -0.0007 | -3E-06  |
| 8.4E-06 | 0.00085 | -0.0003 | -0.0001 | -0.0005 |
| 8.4E-06 | 0.00109 | -0.0007 | 0.00127 | 0.00022 |
| 8.4E-06 | 0.00052 | 8.6E-05 | 0.00093 | -0.0002 |
| 8.5E-06 | 0.00098 | 9.9E-05 | 9.3E-05 | -0.0006 |
| 8.5E-06 | 0.00136 | 0.00049 | 0.00033 | 0.0005  |
| 8.5E-06 | 0.00074 | 0.00023 | 4.5E-05 | 0.00061 |
| 8.6E-06 | 0.00109 | 0.00035 | 0.00135 | 0.00028 |
| 8.6E-06 | 0.00115 | 3.4E-05 | 0.00127 | 0.00119 |
| 8.6E-06 | 0.00056 | 0.00057 | 0.00111 | 0.0007  |
| 8.7E-06 | 0.00107 | -0.0002 | 0.00126 | 4.9E-06 |
| 8.7E-06 | 0.00081 | 0.00038 | 0.0009  | 0.00069 |
| 8.7E-06 | 0.0008  | -0.0001 | 0.00102 | -0.0001 |
| 8.8E-06 | 0.00138 | 0.00043 | -0.0002 | -0.0003 |
| 8.8E-06 | 0.0016  | -0.0002 | 0.00027 | -7E-05  |
| 8.8E-06 | 0.00185 | 0.00014 | 0.00088 | 0.00019 |
| 8.9E-06 | 0.00107 | 0.00044 | 0.00038 | 0.00022 |
| 8.9E-06 | 0.00106 | 0.00024 | 0.00122 | 0.00064 |
| 8.9E-06 | 0.00079 | 0.00117 | 0.00069 | -8E-05  |
| 9E-06   | 0.00094 | 0.00064 | 0.00087 | 0.00052 |
| 9E-06   | 0.00126 | 0.00039 | 0.00105 | -0.0004 |
| 9E-06   | 0.00094 | 0.00044 | 0.00132 | -0.0003 |
| 9.1E-06 | 0.00094 | 0.00032 | 0.00103 | -0.0003 |
| 9.1E-06 | 0.0012  | 0.00075 | 0.00036 | 0.00033 |
| 9.1E-06 | 0.00091 | 0.00012 | 0.00112 | 0.00027 |

|         |         |         |         |         |
|---------|---------|---------|---------|---------|
| 9.2E-06 | 0.00115 | 1.4E-06 | -4E-05  | -0.0002 |
| 9.2E-06 | 0.00115 | -1E-04  | 0.00018 | 0.00036 |
| 9.2E-06 | 0.00104 | 0.00019 | 0.00131 | 0.0001  |
| 9.2E-06 | 0.00137 | 0.00125 | 0.00047 | -0.0006 |
| 9.3E-06 | 0.00095 | 0.00029 | 0.00109 | 0.0002  |
| 9.3E-06 | 0.0019  | 0.00053 | 0.00059 | 0.00033 |
| 9.3E-06 | 0.00101 | -0.0003 | 0.00035 | 0.0002  |
| 9.4E-06 | 0.00162 | -0.0001 | 0.0011  | 7.4E-05 |
| 9.4E-06 | 0.00079 | -0.0002 | 0.00039 | 0.0004  |
| 9.4E-06 | 0.00147 | 0.00098 | 0.00061 | 0.00049 |
| 9.5E-06 | 0.00135 | 0.0004  | -2E-05  | -9E-05  |
| 9.5E-06 | 0.00177 | 0.00113 | -0.0001 | 0.0009  |
| 9.5E-06 | 0.00097 | 0.00033 | 0.00077 | 0.00123 |
| 9.6E-06 | 0.00129 | 2.7E-05 | 0.00047 | 0.00056 |
| 9.6E-06 | 0.00124 | -0.0003 | 0.00075 | -0.0003 |
| 9.6E-06 | 0.001   | 0.00029 | 0.00117 | 0.00018 |
| 9.7E-06 | 0.00088 | 0.0004  | 0.00014 | 0.00146 |
| 9.7E-06 | 0.00135 | 6.1E-05 | 0.00017 | 0.00059 |
| 9.7E-06 | 0.00123 | 0.00087 | 0.00076 | 0.00094 |
| 9.8E-06 | 0.001   | 0.0006  | 0.00141 | 0.00125 |
| 9.8E-06 | 0.00174 | -0.0004 | 0.00091 | 0.00011 |
| 9.8E-06 | 0.00088 | 0.00037 | 0.00136 | 0.00098 |
| 9.9E-06 | 0.00145 | -0.0006 | 0.00077 | -0.0003 |
| 9.9E-06 | 0.00121 | 0.0002  | 0.00067 | 0.00148 |
| 9.9E-06 | 0.00145 | 0.00036 | 0.0013  | 0.00032 |
| 1E-05   | 0.00122 | 0.0006  | 0.00091 | 0.00125 |
| 1E-05   | 0.00152 | 0.00095 | 0.00074 | 7.1E-05 |
| 1E-05   | 0.00159 | 0.00055 | -0.0003 | 2.8E-06 |
| 1E-05   | 0.0019  | 0.00128 | -0.0002 | -0.0004 |
| 1E-05   | 0.00111 | 3.5E-05 | 0.00055 | 0.0002  |
| 1E-05   | 0.00167 | 0.00075 | 0.00024 | -0.0011 |
| 1E-05   | 0.00156 | -6E-06  | 0.00065 | -0.0004 |
| 1E-05   | 0.00137 | 0.00036 | 0.00056 | 0.00017 |
| 1E-05   | 0.00181 | 5.3E-07 | 0.00076 | 0.00045 |
| 1E-05   | 0.00165 | 7.4E-05 | 0.00115 | 0.00011 |
| 1E-05   | 0.00114 | 0.00046 | 0.00033 | -0.0001 |
| 1E-05   | 0.001   | 0.0006  | 0.00036 | -0.0006 |
| 1E-05   | 0.00087 | -0.0003 | 0.00047 | 0.00024 |
| 1E-05   | 0.00145 | 0.0002  | -5E-05  | -0.001  |
| 1E-05   | 0.00111 | 0.00024 | 0.00137 | -8E-05  |
| 1E-05   | 0.00085 | -0.0002 | 0.00079 | -0.0004 |
| 1E-05   | 0.00108 | -6E-05  | 0.00146 | -0.0001 |
| 1.1E-05 | 0.00179 | 0.00073 | 7.1E-05 | 0.0001  |
| 1.1E-05 | 0.00082 | -0.0001 | 0.00102 | -0.0006 |
| 1.1E-05 | 0.00098 | 0.00159 | 0.00019 | 0.0006  |
| 1.1E-05 | 0.00111 | 0.00107 | 0.00093 | 0.00034 |
| 1.1E-05 | 0.00124 | 0.00097 | 0.00094 | 0.00051 |
| 1.1E-05 | 0.002   | 2.8E-06 | -0.0002 | 8.7E-05 |
| 1.1E-05 | 0.00147 | 0.00044 | 0.00113 | -0.0003 |
| 1.1E-05 | 0.00117 | 0.00025 | 0.00133 | -0.0006 |
| 1.1E-05 | 0.00087 | 0.00011 | 0.00144 | -0.0002 |
| 1.1E-05 | 0.00157 | 0.00053 | 0.0005  | -0.0001 |
| 1.1E-05 | 0.00111 | 6.6E-05 | 0.00037 | 0.00018 |
| 1.1E-05 | 0.00083 | 0.00018 | 0.00173 | -0.0007 |



|         |         |         |         |         |
|---------|---------|---------|---------|---------|
| 1.1E-05 | 0.00112 | 0.00016 | 0.00069 | 0.00052 |
| 1.1E-05 | 0.00134 | 0.00039 | 0.00029 | 0.0006  |
| 1.1E-05 | 0.00071 | 0.00052 | 0.00121 | 8E-05   |
| 1.1E-05 | 0.00082 | 0.0005  | 0.00086 | 0.00011 |
| 1.1E-05 | 0.00083 | 0.00099 | 0.0004  | -0.0001 |
| 1.1E-05 | 0.00118 | 0.00063 | 0.00035 | 0.00016 |
| 1.1E-05 | 0.00097 | 0.00101 | 0.00061 | -0.0002 |
| 1.1E-05 | 0.00139 | -0.0001 | 0.00116 | 0.00109 |
| 1.1E-05 | 0.00169 | 0.00069 | 0.00035 | -0.0004 |
| 1.1E-05 | 0.00153 | 0.00013 | 0.00142 | 0.00049 |
| 1.1E-05 | 0.00112 | -4E-05  | 0.0011  | -0.001  |
| 1.1E-05 | 0.0019  | -9E-05  | 0.00046 | -0.0002 |
| 1.1E-05 | 0.00184 | 0.00047 | 0.00046 | 0.00014 |
| 1.1E-05 | 0.00178 | 0.0004  | -3E-05  | -0.0004 |
| 1.1E-05 | 0.00121 | 0.00018 | 0.00118 | -0.0002 |
| 1.1E-05 | 0.00108 | 0.00077 | 0.00062 | 0.00013 |
| 1.1E-05 | 0.00141 | -8E-05  | 0.00197 | -0.0004 |
| 1.1E-05 | 0.00096 | -0.0003 | 0.00041 | 0.00032 |
| 1.1E-05 | 0.00091 | 0.00058 | 0.00065 | 0.00033 |
| 1.1E-05 | 0.00118 | 0.00075 | -0.0001 | -0.0004 |
| 1.2E-05 | 0.00115 | 0.0008  | 0.00079 | -0.0005 |
| 1.2E-05 | 0.0015  | 0.00074 | 0.00067 | -0.0002 |
| 1.2E-05 | 0.00111 | 0.00098 | 0.00032 | 0.00108 |
| 1.2E-05 | 0.00128 | 0.00077 | 0.00038 | -0.0004 |
| 1.2E-05 | 0.00127 | 6.9E-05 | 0.0006  | 0.00038 |
| 1.2E-05 | 0.00146 | -0.0004 | 0.00021 | 0.00026 |
| 1.2E-05 | 0.00074 | 0.0007  | 0.00027 | 0.00059 |
| 1.2E-05 | 0.00159 | 0.00079 | 0.00016 | 0.00048 |
| 1.2E-05 | 0.001   | 0.00046 | 0.00018 | 0.00036 |
| 1.2E-05 | 0.00145 | 0.00029 | 0.00102 | -4E-05  |
| 1.2E-05 | 0.00148 | 0.00059 | -0.0001 | 4.7E-06 |
| 1.2E-05 | 0.0013  | -0.0003 | 0.0006  | -0.0007 |
| 1.2E-05 | 0.00168 | 0.00073 | 0.00045 | 0.00032 |
| 1.2E-05 | 0.00129 | 0.00034 | 0.00028 | -4E-05  |
| 1.2E-05 | 0.0011  | 0.00077 | 0.00068 | 0.00086 |
| 1.2E-05 | 0.00166 | 0.00061 | 0.00053 | 0.00059 |
| 1.2E-05 | 0.00246 | 0.0004  | 0.00033 | -0.0006 |
| 1.2E-05 | 0.00116 | -3E-05  | 0.00157 | 0.00039 |
| 1.2E-05 | 0.00132 | 0.00048 | 0.00083 | -0.0003 |
| 1.2E-05 | 0.00127 | 0.00017 | 9.6E-05 | 0.00094 |
| 1.2E-05 | 0.00171 | -5E-06  | 0.00038 | -0.0003 |
| 1.2E-05 | 0.00072 | -0.0002 | -0.0001 | 0.00072 |
| 1.2E-05 | 0.00142 | 0.00035 | 0.00047 | 6.3E-05 |
| 1.2E-05 | 0.00129 | 0.0011  | 0.00119 | 0.00011 |
| 1.2E-05 | 0.00139 | 0.00063 | 0.00031 | -0.0003 |
| 1.2E-05 | 0.00105 | 0.00059 | 0.00015 | 0.0003  |
| 1.2E-05 | 0.00151 | -0.0007 | -2E-05  | 0.00043 |
| 1.2E-05 | 0.00063 | 0.00037 | 0.00032 | 0.00013 |
| 1.2E-05 | 0.00148 | 0.00108 | 0.00075 | 0.00059 |
| 1.2E-05 | 0.00089 | -0.0003 | 0.00074 | -0.0007 |
| 1.2E-05 | 0.00256 | 0.00033 | 0.00081 | -0.0006 |
| 1.3E-05 | 0.00173 | 0.0004  | 0.0002  | 0.00033 |
| 1.3E-05 | 0.00163 | 0.00035 | 0.00105 | -0.0002 |
| 1.3E-05 | 0.00119 | 0.00037 | 0.00065 | 0.00014 |

|         |         |         |         |         |
|---------|---------|---------|---------|---------|
| 1.3E-05 | 0.00086 | 0.00053 | 0.00017 | 0.00033 |
| 1.3E-05 | 0.0017  | 0.00053 | 0.00081 | -8E-05  |
| 1.3E-05 | 0.0012  | -0.0001 | 0.00055 | 0.00015 |
| 1.3E-05 | 0.00115 | 0.00058 | 0.00094 | -0.0001 |
| 1.3E-05 | 0.00116 | 0.00064 | 0.00143 | -0.0007 |
| 1.3E-05 | 0.00122 | 0.00097 | 0.0005  | 0.00045 |
| 1.3E-05 | 0.00166 | 0.00063 | 0.00037 | -0.0008 |
| 1.3E-05 | 0.00186 | 0.00052 | 0.00115 | 2.4E-05 |
| 1.3E-05 | 0.00112 | 0.00078 | 0.00063 | 0.0003  |
| 1.3E-05 | 0.00162 | 8.3E-05 | -2E-05  | 0.00025 |
| 1.3E-05 | 0.00121 | 2.7E-05 | 0.00161 | 0.00024 |
| 1.3E-05 | 0.00126 | 0.00065 | -0.0003 | 0.00029 |
| 1.3E-05 | 0.00168 | 0.0004  | 0.00055 | 0.00054 |
| 1.3E-05 | 0.00138 | 0.00059 | 0.00023 | -0.0007 |
| 1.3E-05 | 0.00206 | 0.00071 | 2.2E-05 | -0.0001 |
| 1.3E-05 | 0.00125 | 0.00061 | 0.00026 | -7E-05  |
| 1.3E-05 | 0.0014  | 0.00083 | 0.00012 | -0.0002 |
| 1.3E-05 | 0.0011  | 0.00033 | 0.00161 | -0.0003 |
| 1.3E-05 | 0.00145 | 0.00071 | 0.001   | -0.0004 |
| 1.3E-05 | 0.00122 | 0.00067 | 0.00069 | 0.00017 |
| 1.3E-05 | 0.00167 | 0.00042 | 0.00084 | 9.5E-05 |
| 1.3E-05 | 0.00167 | -0.0004 | 0.00041 | -0.0005 |
| 1.3E-05 | 0.00161 | 0.001   | 0.0007  | 0.00015 |
| 1.3E-05 | 0.00146 | 0.00119 | 0.00097 | -0.0006 |
| 1.3E-05 | 0.00145 | 7.5E-05 | 0.00054 | -0.0005 |
| 1.3E-05 | 0.0008  | 0.00039 | 0.0006  | -0.0003 |
| 1.3E-05 | 0.00123 | 0.0005  | 0.00136 | 9.3E-05 |
| 1.3E-05 | 0.00119 | 0.00113 | 0.00112 | 0.00012 |
| 1.4E-05 | 0.00069 | 0.00043 | 0.00055 | -0.0005 |
| 1.4E-05 | 0.0013  | 0.00034 | 0.00032 | -0.0002 |
| 1.4E-05 | 0.00129 | 0.00098 | 0.00073 | -0.0005 |
| 1.4E-05 | 0.0005  | 0.00043 | 0.00023 | -4E-05  |
| 1.4E-05 | 0.00127 | 0.00081 | 0.00109 | -0.0002 |
| 1.4E-05 | 0.00108 | 0.0002  | 0.00056 | -0.0007 |
| 1.4E-05 | 0.00194 | 2.3E-05 | 0.00082 | -0.0002 |
| 1.4E-05 | 0.00104 | 0.0006  | 0.00096 | 0.0012  |
| 1.4E-05 | 0.00128 | 5.4E-05 | 0.001   | 0.00088 |
| 1.4E-05 | 0.00177 | 0.00045 | 0.00063 | 0.00035 |
| 1.4E-05 | 0.00171 | 0.00084 | 0.00067 | -0.0005 |
| 1.4E-05 | 1.8E-05 | 0.0005  | 0.00036 | -0.0004 |
| 1.4E-05 | 0.00123 | -8E-05  | 0.00141 | 0.00036 |
| 1.4E-05 | 0.00174 | 0.00087 | 0.00062 | -0.0008 |
| 1.4E-05 | 0.00118 | 0.00056 | 0.00012 | -0.0005 |
| 1.4E-05 | 0.00127 | 0.00118 | 0.0009  | -0.0009 |
| 1.4E-05 | 0.00054 | 0.00078 | 0.00125 | -0.0004 |
| 1.4E-05 | 0.00029 | 0.00115 | 0.00083 | 0.00031 |
| 1.4E-05 | 0.00048 | 0.0012  | 0.0011  | 0.00054 |
| 1.4E-05 | 0.00172 | 0.00067 | 0.00186 | -0.0002 |
| 1.4E-05 | 0.00163 | 0.00045 | 0.00063 | -0.0002 |
| 1.4E-05 | 0.00116 | 0.00093 | 0.00121 | 0.00042 |
| 1.4E-05 | 0.00062 | 0.0003  | 0.00013 | -5E-05  |
| 1.4E-05 | 0.00102 | 0.00052 | 0.00083 | -0.0002 |
| 1.4E-05 | 0.00202 | 0.00076 | 0.00142 | 0.00026 |
| 1.4E-05 | 0.00039 | 0.0006  | 0.00218 | 0.00038 |

|         |         |         |         |         |
|---------|---------|---------|---------|---------|
| 1.4E-05 | 0.00066 | 0.00064 | 0.00072 | 0.0002  |
| 1.4E-05 | 0.00146 | 0.00075 | 8.4E-05 | -0.0004 |
| 1.4E-05 | 0.00153 | 0.00047 | 0.0011  | 0.00065 |
| 1.4E-05 | 0.0008  | 0.00075 | 0.00126 | -0.0001 |
| 1.4E-05 | 0.00069 | 0.00112 | 0.00066 | 0.00022 |
| 1.5E-05 | 0.0014  | 0.00048 | 0.0013  | 0.00029 |
| 1.5E-05 | 0.00119 | 0.00125 | 0.00087 | 0.00043 |
| 1.5E-05 | 0.00125 | 0.00083 | 0.00097 | 0.00048 |
| 1.5E-05 | 0.00097 | 0.00039 | 0.00047 | 0.00039 |
| 1.5E-05 | 0.00163 | 0.00024 | 0.00076 | -0.0004 |
| 1.5E-05 | 0.00194 | -0.0002 | 0.00102 | 0.0001  |
| 1.5E-05 | 0.00098 | 0.00058 | 0.00134 | -0.0002 |
| 1.5E-05 | 0.00179 | 0.00023 | 0.00098 | 0.00017 |
| 1.5E-05 | 0.00181 | 0.0002  | 0.00136 | -0.0007 |
| 1.5E-05 | 0.00161 | -0.0004 | 0.00094 | 0.00019 |
| 1.5E-05 | 0.00155 | 0.00051 | 0.00021 | 0.00066 |
| 1.5E-05 | 0.00119 | 0.0003  | 0.0006  | 0.00056 |
| 1.5E-05 | 0.00093 | 0.00054 | 0.00087 | 0.00018 |
| 1.5E-05 | 0.0009  | 0.00078 | -3E-05  | -0.0004 |
| 1.5E-05 | 0.002   | 0.00016 | 0.00086 | -0.0005 |
| 1.5E-05 | 0.00117 | 0.00062 | 0.00062 | -0.0003 |

**Table SI.2A:** Primary kinetic data for the reaction of 2-pyrrolidone (**S2**) with CumO• generated by 355 nm LFP in MeCN (**Figure SI.2A**).

| t / s   | $\Delta A$ 2-pyrrolidinone ( <b>S2</b> ) |               |               |               |               |
|---------|------------------------------------------|---------------|---------------|---------------|---------------|
|         | <b>0.130M</b>                            | <b>0.258M</b> | <b>0.445M</b> | <b>0.627M</b> | <b>0.803M</b> |
| -1E-06  | 0.00066                                  | 0.00066       | -7E-05        | 0.00045       | -0.0008       |
| -1E-06  | -0.0008                                  | 0.00068       | 8.3E-05       | -0.0002       | -0.0005       |
| -9E-07  | -0.0005                                  | 0.00032       | -0.0007       | 0.00027       | 6.5E-05       |
| -9E-07  | -0.0004                                  | 0.00088       | -0.0005       | -0.0003       | -0.0002       |
| -9E-07  | 0.00017                                  | 0.00118       | -0.0009       | -2E-05        | -0.0004       |
| -8E-07  | -0.0006                                  | 0.00023       | -0.0006       | -0.0005       | 0.00018       |
| -8E-07  | -0.0011                                  | 0.00054       | -0.0005       | -2E-05        | -0.0002       |
| -8E-07  | -0.0005                                  | 0.001         | 9.3E-05       | 0.0006        | 5E-05         |
| -7E-07  | -1E-05                                   | 0.00067       | -0.0004       | 2.8E-05       | -0.0007       |
| -7E-07  | -0.0012                                  | 0.00033       | -0.0011       | -0.0004       | -0.0003       |
| -7E-07  | -0.0007                                  | 0.00101       | -0.0009       | -3E-05        | -0.0002       |
| -6E-07  | -0.0006                                  | 0.00101       | -0.0005       | -0.0002       | -0.0006       |
| -6E-07  | -0.0012                                  | 0.00087       | -0.002        | -0.0002       | -0.001        |
| -6E-07  | -0.0004                                  | 0.00107       | -0.001        | 0.00035       | -0.0001       |
| -5E-07  | 0.00058                                  | 0.00089       | -0.0008       | -8E-05        | 0.00013       |
| -5E-07  | -0.0003                                  | 0.00056       | -0.0011       | 0.00045       | -0.0006       |
| -5E-07  | -0.0006                                  | 0.00126       | -0.0012       | 0.00067       | -0.0008       |
| -4E-07  | -0.0004                                  | 0.00076       | -0.0003       | -9E-05        | -0.0004       |
| -4E-07  | -0.0005                                  | 0.0003        | -0.0011       | -0.0005       | 0.00037       |
| -4E-07  | -0.0001                                  | 0.00101       | -0.0007       | -0.0001       | -0.0005       |
| -4E-07  | -0.0007                                  | 0.00091       | -0.0008       | 0.0003        | -0.0001       |
| -3E-07  | 0.00031                                  | 0.00068       | -0.0007       | 0.00027       | -0.0007       |
| -3E-07  | -1E-05                                   | 0.00111       | -0.0003       | -0.0001       | -0.0005       |
| -3E-07  | -0.0005                                  | 0.0005        | -0.0008       | -0.0006       | -0.0005       |
| -2E-07  | -0.0001                                  | -0.0001       | -0.0002       | -0.0004       | 0.00011       |
| -2E-07  | 0.00025                                  | 0.00066       | -0.0007       | -0.0003       | -0.0002       |
| -2E-07  | -8E-05                                   | 0.00117       | -0.0006       | -7E-05        | -0.0005       |
| -1E-07  | -0.0004                                  | 0.00108       | -0.0006       | -0.0001       | -0.0004       |
| -1E-07  | -0.001                                   | 0.00089       | -0.0005       | 1.2E-06       | -0.0007       |
| -6E-08  | -0.0009                                  | 0.00094       | -0.001        | -0.0004       | -0.0008       |
| -3E-08  | -0.0003                                  | 0.00099       | -0.0004       | -0.0002       | -0.001        |
| -2E-10  | -0.0032                                  | -0.003        | -0.0049       | -0.003        | -0.003        |
| 3.2E-08 | -0.0131                                  | -0.0175       | -0.0211       | -0.0189       | -0.0169       |
| 6.4E-08 | 0.01042                                  | 0.01026       | 0.00779       | 0.00642       | 0.00443       |
| 9.6E-08 | 0.01463                                  | 0.01687       | 0.0148        | 0.01442       | 0.01457       |
| 1.3E-07 | 0.01519                                  | 0.01627       | 0.01397       | 0.01309       | 0.01325       |
| 1.6E-07 | 0.01405                                  | 0.01516       | 0.01325       | 0.01194       | 0.01235       |
| 1.9E-07 | 0.01363                                  | 0.01466       | 0.0118        | 0.01146       | 0.01083       |
| 2.2E-07 | 0.01404                                  | 0.01475       | 0.01197       | 0.0111        | 0.01016       |
| 2.6E-07 | 0.01293                                  | 0.01406       | 0.01125       | 0.01035       | 0.01023       |
| 2.9E-07 | 0.01201                                  | 0.0129        | 0.01134       | 0.00983       | 0.00932       |
| 3.2E-07 | 0.01294                                  | 0.01243       | 0.01046       | 0.00853       | 0.00816       |
| 3.5E-07 | 0.01206                                  | 0.0113        | 0.00945       | 0.00816       | 0.00714       |
| 3.8E-07 | 0.01137                                  | 0.01112       | 0.00867       | 0.00829       | 0.00673       |
| 4.2E-07 | 0.01099                                  | 0.0109        | 0.00855       | 0.00705       | 0.00677       |
| 4.5E-07 | 0.0111                                   | 0.01102       | 0.00813       | 0.00657       | 0.00644       |
| 4.8E-07 | 0.00943                                  | 0.00998       | 0.00735       | 0.00682       | 0.00599       |
| 5.1E-07 | 0.00989                                  | 0.01023       | 0.00727       | 0.00591       | 0.00537       |
| 5.4E-07 | 0.00964                                  | 0.00976       | 0.00665       | 0.00538       | 0.0047        |

|         |         |         |         |         |         |
|---------|---------|---------|---------|---------|---------|
| 5.8E-07 | 0.00929 | 0.00962 | 0.007   | 0.00504 | 0.00373 |
| 6.1E-07 | 0.0086  | 0.00917 | 0.00596 | 0.00477 | 0.00399 |
| 6.4E-07 | 0.00801 | 0.00895 | 0.00602 | 0.00418 | 0.00347 |
| 6.7E-07 | 0.00779 | 0.00876 | 0.00573 | 0.00459 | 0.00351 |
| 7E-07   | 0.00789 | 0.0078  | 0.00383 | 0.0041  | 0.00353 |
| 7.4E-07 | 0.00798 | 0.00808 | 0.00471 | 0.00445 | 0.00326 |
| 7.7E-07 | 0.00777 | 0.00733 | 0.00522 | 0.0044  | 0.00229 |
| 8E-07   | 0.00783 | 0.00752 | 0.00449 | 0.00315 | 0.00269 |
| 8.3E-07 | 0.00703 | 0.00687 | 0.00381 | 0.00296 | 0.00192 |
| 8.6E-07 | 0.00641 | 0.0072  | 0.0037  | 0.00261 | 0.00212 |
| 9E-07   | 0.00579 | 0.00666 | 0.00323 | 0.003   | 0.00202 |
| 9.3E-07 | 0.0064  | 0.00674 | 0.004   | 0.00281 | 0.00177 |
| 9.6E-07 | 0.00537 | 0.00521 | 0.00394 | 0.00323 | 0.00221 |
| 9.9E-07 | 0.00458 | 0.00616 | 0.00336 | 0.00252 | 0.00107 |
| 1E-06   | 0.0056  | 0.00653 | 0.00277 | 0.00265 | 0.00125 |
| 1.1E-06 | 0.00567 | 0.00644 | 0.00242 | 0.00266 | 0.00112 |
| 1.1E-06 | 0.00499 | 0.00545 | 0.00296 | 0.00178 | 0.00088 |
| 1.1E-06 | 0.00549 | 0.0059  | 0.00249 | 0.00163 | 0.00166 |
| 1.2E-06 | 0.00479 | 0.00545 | 0.00251 | 0.00194 | 0.001   |
| 1.2E-06 | 0.00447 | 0.00495 | 0.00192 | 0.00156 | 0.00164 |
| 1.2E-06 | 0.00429 | 0.00513 | 0.0015  | 0.00116 | 0.00107 |
| 1.2E-06 | 0.00478 | 0.00436 | 0.0016  | 0.00219 | 0.00112 |
| 1.3E-06 | 0.00423 | 0.00376 | 0.00177 | 0.0022  | 0.00049 |
| 1.3E-06 | 0.00396 | 0.00513 | 0.0014  | 0.00213 | 0.00039 |
| 1.3E-06 | 0.00429 | 0.00471 | 0.00126 | 0.00154 | 0.00092 |
| 1.4E-06 | 0.00408 | 0.00511 | 0.00107 | 0.00108 | 0.00121 |
| 1.4E-06 | 0.00381 | 0.00444 | 0.00152 | 0.00098 | 0.00134 |
| 1.4E-06 | 0.00303 | 0.00439 | 0.00127 | 0.00071 | 0.00132 |
| 1.5E-06 | 0.00465 | 0.00403 | 0.00134 | 0.00105 | 0.00044 |
| 1.5E-06 | 0.00365 | 0.00408 | 0.0014  | 0.0012  | 0.00093 |
| 1.5E-06 | 0.00279 | 0.0044  | 0.00164 | 0.00088 | 0.00099 |
| 1.6E-06 | 0.00305 | 0.00399 | 0.00134 | 0.00081 | 0.00042 |
| 1.6E-06 | 0.00317 | 0.00391 | 0.0004  | 0.00157 | 0.00055 |
| 1.6E-06 | 0.00296 | 0.00374 | 0.00096 | 0.00101 | 0.00034 |
| 1.7E-06 | 0.00321 | 0.00322 | 0.0014  | 0.00097 | 0.00031 |
| 1.7E-06 | 0.00258 | 0.00308 | 0.00077 | 0.00048 | 0.00051 |
| 1.7E-06 | 0.00291 | 0.00279 | 0.00119 | 0.00061 | 0.00072 |
| 1.8E-06 | 0.00288 | 0.00229 | 0.00041 | 0.00063 | 0.00053 |
| 1.8E-06 | 0.00233 | 0.00354 | 0.00043 | 0.00082 | -0.0003 |
| 1.8E-06 | 0.00304 | 0.00308 | 0.00102 | 0.00055 | 0.00032 |
| 1.9E-06 | 0.00228 | 0.00318 | 3.5E-05 | 0.00071 | 5.7E-06 |
| 1.9E-06 | 0.00272 | 0.00307 | 0.00043 | 0.00055 | 0.00053 |
| 1.9E-06 | 0.00262 | 0.00286 | 0.00056 | 0.00081 | 0.00047 |
| 2E-06   | 0.00259 | 0.00322 | 0.00121 | 0.0007  | 0.00058 |
| 2E-06   | 0.00192 | 0.00328 | 0.00109 | 0.00124 | 7.7E-05 |
| 2E-06   | 0.00233 | 0.00217 | 0.00079 | 0.00094 | 0.00026 |
| 2E-06   | 0.00258 | 0.00272 | 0.00045 | 0.00053 | -7E-05  |
| 2.1E-06 | 0.00229 | 0.00324 | 0.0007  | 0.0007  | -0.0006 |
| 2.1E-06 | 0.00222 | 0.00283 | 0.00082 | 0.00088 | -0.0008 |
| 2.1E-06 | 0.00254 | 0.00233 | 3.2E-05 | 0.00055 | -0.0004 |
| 2.2E-06 | 0.00161 | 0.00255 | 0.00061 | 0.00085 | 0.00099 |
| 2.2E-06 | 0.00191 | 0.00264 | 0.00038 | 0.00056 | 0.00112 |
| 2.2E-06 | 0.00217 | 0.00184 | -7E-05  | 0.0006  | 0.0007  |
| 2.3E-06 | 0.00179 | 0.0023  | 0.0007  | 0.00027 | 0.00014 |

|         |         |         |         |         |         |
|---------|---------|---------|---------|---------|---------|
| 2.3E-06 | 0.00145 | 0.00223 | 5.1E-05 | 0.00053 | -0.0002 |
| 2.3E-06 | 0.00151 | 0.00178 | 0.00078 | 0.00082 | -3E-05  |
| 2.4E-06 | 0.00154 | 0.00184 | 0.00113 | -0.0004 | 0.00057 |
| 2.4E-06 | 0.00044 | 0.00245 | 0.00048 | 0.00062 | 0.00063 |
| 2.4E-06 | 0.00167 | 0.00226 | 0.00079 | 0.00108 | 0.00058 |
| 2.5E-06 | 0.00124 | 0.00226 | 0.00074 | 0.00032 | 0.00022 |
| 2.5E-06 | 0.00187 | 0.00268 | 0.00052 | 0.00067 | -0.0002 |
| 2.5E-06 | 0.00205 | 0.00229 | 0.00065 | 0.00131 | 0.00093 |
| 2.6E-06 | 0.00123 | 0.002   | 0.00053 | 0.00061 | 0.00036 |
| 2.6E-06 | 0.00122 | 0.00262 | 0.00015 | 0.0011  | 0.00047 |
| 2.6E-06 | 0.00131 | 0.00232 | 0.00057 | -0.0005 | 0.00012 |
| 2.7E-06 | 0.00179 | 0.0022  | 0.00046 | 0.00081 | 0.00018 |
| 2.7E-06 | 0.00117 | 0.0023  | -3E-06  | 0.00129 | 0.00057 |
| 2.7E-06 | 0.00123 | 0.00168 | 0.00079 | 0.00032 | 0.00042 |
| 2.8E-06 | 0.00128 | 0.00245 | 0.00089 | 0.00072 | -0.0003 |
| 2.8E-06 | 0.00123 | 0.00232 | -0.0002 | 0.00086 | -0.0001 |
| 2.8E-06 | 0.00106 | 0.00225 | 0.00045 | 0.00043 | -0.0002 |
| 2.8E-06 | 0.0017  | 0.00177 | -0.0004 | 0.00033 | -4E-05  |
| 2.9E-06 | 0.00095 | 0.00146 | 0.00029 | 0.00079 | 0.00042 |
| 2.9E-06 | 0.00098 | 0.0018  | 7.8E-05 | 0.00015 | -6E-05  |
| 2.9E-06 | 0.00105 | 0.00143 | 0.00075 | 0.00136 | -0.0002 |
| 3E-06   | 0.0014  | 0.00165 | -8E-05  | 0.00177 | 0.00051 |
| 3E-06   | 0.00076 | 0.0007  | 0.00073 | 0.00128 | 0.00047 |
| 3E-06   | 0.00094 | 0.00127 | 0.00104 | -1E-05  | 0.001   |
| 3.1E-06 | 0.00129 | 0.00077 | -0.0002 | 0.00125 | 0.00012 |
| 3.1E-06 | 0.00136 | 0.00217 | 0.00062 | 0.00036 | 0.00011 |
| 3.1E-06 | 0.00069 | 0.0017  | -0.0003 | -0.0003 | -5E-05  |
| 3.2E-06 | 0.00086 | 0.00241 | -0.0002 | 0.00075 | -0.0001 |
| 3.2E-06 | 0.00054 | 0.00178 | 0.00029 | 0.00041 | 0.00041 |
| 3.2E-06 | 0.00037 | 0.00197 | 0.00076 | 0.0013  | 0.00032 |
| 3.3E-06 | 0.00092 | 0.00129 | 0.00028 | 0.00042 | 0.00038 |
| 3.3E-06 | 0.00011 | 0.00246 | 9.6E-05 | -2E-05  | 0.00033 |
| 3.3E-06 | 0.00106 | 0.00099 | 0.00019 | 0.00025 | 0.00041 |
| 3.4E-06 | 0.00061 | 0.00132 | 0.00055 | 0.00091 | 0.00075 |
| 3.4E-06 | 0.00113 | 0.00154 | -0.0002 | 0.00077 | 0.00039 |
| 3.4E-06 | 0.00113 | 0.00215 | -0.0003 | 0.0008  | -0.0003 |
| 3.5E-06 | 0.0005  | 0.00243 | 0.00065 | 0.0005  | 0.00036 |
| 3.5E-06 | 0.00124 | 0.00221 | 0.00063 | 0.00129 | 0.00036 |
| 3.5E-06 | 0.00108 | 0.00131 | 6.2E-05 | -5E-05  | 0.00063 |
| 3.6E-06 | 0.00035 | 0.00198 | 0.00032 | 0.00081 | -0.0002 |
| 3.6E-06 | 0.00073 | 0.00246 | 6.9E-05 | 0.00044 | 0.00063 |
| 3.6E-06 | 0.00013 | 0.00219 | 0.00028 | -0.0004 | 0.00048 |
| 3.6E-06 | 0.00052 | 0.00139 | -0.0008 | 0.00069 | 0.00067 |
| 3.7E-06 | -8E-05  | 0.00038 | 0.00019 | -9E-05  | -0.0002 |
| 3.7E-06 | 0.00091 | 0.00144 | -0.0008 | 0.00041 | 0.00055 |
| 3.7E-06 | 0.00023 | 0.00159 | -0.0006 | 0.0006  | 0.00019 |
| 3.8E-06 | 0.0003  | 0.00159 | -0.0002 | 0.00024 | 8.6E-05 |
| 3.8E-06 | -0.0008 | 0.00155 | -0.0002 | 0.0018  | -1E-05  |
| 3.8E-06 | 6.8E-05 | 0.00143 | 0.00027 | 0.00011 | -0.0006 |
| 3.9E-06 | 0.00079 | 0.00139 | -0.0002 | -0.001  | 0.00046 |
| 3.9E-06 | 0.00104 | 0.00193 | -0.0002 | -0.0008 | 0.00029 |
| 3.9E-06 | 0.00034 | 0.00208 | -3E-05  | 0.00029 | 0.00031 |
| 4E-06   | -5E-05  | 0.00232 | -0.0005 | -0.0004 | 0.00047 |
| 4E-06   | 0.00061 | 0.00227 | -0.0001 | 0.00061 | -0.0003 |

|         |         |         |         |         |         |
|---------|---------|---------|---------|---------|---------|
| 4E-06   | 0.00064 | 0.0021  | -0.0003 | 0.00081 | 0.00067 |
| 4.1E-06 | 0.00043 | 0.00147 | 0.00017 | 0.00047 | -0.0004 |
| 4.1E-06 | 0.00083 | 0.00108 | -0.0008 | 0.00054 | 8.5E-05 |
| 4.1E-06 | 0.00024 | 0.00169 | -0.0004 | 0.00036 | 0.00041 |
| 4.2E-06 | 0.00073 | 0.00033 | -0.0003 | 0.0006  | -0.0005 |
| 4.2E-06 | 0.00066 | 0.00182 | -0.0002 | 0.00023 | -3E-05  |
| 4.2E-06 | 0.00087 | 0.0015  | 0.00074 | 3.8E-05 | 0.0004  |
| 4.3E-06 | 0.00054 | 0.00166 | 0.00059 | 0.00157 | -0.0002 |
| 4.3E-06 | -0.0005 | 0.00198 | 0.00078 | 0.00136 | 3.7E-05 |
| 4.3E-06 | 0.00079 | 0.00112 | 0.00025 | 0.00093 | 0.00025 |
| 4.4E-06 | 0.00095 | 0.00151 | 8.1E-05 | 0.00065 | -3E-05  |
| 4.4E-06 | 0.00029 | 0.00063 | -7E-05  | -0.0002 | -0.0004 |
| 4.4E-06 | 0.0001  | 0.00083 | -0.0002 | -0.0003 | 0.00027 |
| 4.4E-06 | 0.00039 | 0.0016  | -0.0002 | 0.00052 | 0.00066 |
| 4.5E-06 | -4E-05  | 0.00152 | -0.0004 | 0.00124 | -8E-05  |
| 4.5E-06 | 0.00063 | 0.00103 | 9.6E-05 | 0.00016 | 0.00043 |
| 4.5E-06 | 0.0009  | 0.00128 | -0.0006 | 0.00068 | 0.00021 |
| 4.6E-06 | -0.0003 | 0.00143 | 0.00014 | 0.00013 | 0.00039 |
| 4.6E-06 | 0.00089 | 0.00186 | -0.0005 | 0.0006  | 0.00045 |
| 4.6E-06 | 0.00018 | 0.00186 | -0.0007 | -0.0002 | 0.00049 |
| 4.7E-06 | -0.0004 | 0.00127 | 0.00032 | 0.00015 | -0.0002 |
| 4.7E-06 | 0.00056 | 0.00136 | -8E-05  | 0.0002  | -0.0003 |
| 4.7E-06 | -0.0004 | 0.00128 | 0.00023 | 0.00037 | 0.0004  |
| 4.8E-06 | 0.00031 | 0.00179 | 0.00054 | 0.00083 | 0.00082 |
| 4.8E-06 | 0.00022 | 0.00128 | 0.00034 | 0.00091 | 0.00064 |
| 4.8E-06 | 0.0005  | 0.00205 | 0.0007  | 0.00022 | 0.00061 |
| 4.9E-06 | 0.00017 | 0.00146 | -0.0003 | 0.00061 | 0.00069 |
| 4.9E-06 | 0.00035 | 0.00238 | 0.00057 | 0.00099 | 0.0009  |
| 4.9E-06 | -0.0004 | 0.00137 | 0.00078 | -0.0006 | 2.7E-05 |
| 5E-06   | 0.00058 | 0.00124 | 0.00032 | 0.00037 | 0.00038 |
| 5E-06   | 0.00086 | 0.0008  | -0.0002 | 0.0008  | 0.00028 |
| 5E-06   | 7.4E-05 | 0.0015  | 2.3E-05 | 0.00074 | 0.00018 |
| 5.1E-06 | 0.00082 | 0.0018  | -0.0007 | 0.00042 | 0.00011 |
| 5.1E-06 | -7E-05  | 0.0012  | 8.1E-05 | 0.00082 | 9.5E-05 |
| 5.1E-06 | -0.0007 | 0.00137 | 0.00051 | 0.00107 | 0.00075 |
| 5.2E-06 | 2.9E-05 | 0.00106 | -2E-05  | 0.00034 | 0.00107 |
| 5.2E-06 | 0.00092 | 0.00046 | 0.00057 | 0.00012 | 0.00047 |
| 5.2E-06 | 0.00022 | 0.00141 | -0.0004 | -0.0001 | -4E-05  |
| 5.2E-06 | 0.00089 | 0.00158 | -0.0005 | 0.00022 | -0.0004 |
| 5.3E-06 | 0.00026 | 0.00136 | 0.00024 | 0.00072 | 0.00028 |
| 5.3E-06 | 0.00058 | 0.00152 | 0.00052 | 0.00121 | 0.00027 |
| 5.3E-06 | 2.7E-05 | 0.00148 | 0.00034 | 2.2E-05 | 0.00029 |
| 5.4E-06 | 0.00019 | 0.00091 | 0.00021 | -5E-06  | 0.0002  |
| 5.4E-06 | -0.0006 | 0.00196 | 0.0008  | -0.0002 | -0.0003 |
| 5.4E-06 | 7.7E-05 | 0.00155 | -0.0005 | 0.0002  | 0.00103 |
| 5.5E-06 | 0.00076 | 0.00097 | 0.00065 | -3E-05  | 0.00036 |
| 5.5E-06 | -0.0006 | 0.00106 | 0.00025 | 0.00016 | 0.00097 |
| 5.5E-06 | 0.00017 | 0.00183 | 0.00047 | -0.0003 | 0.00022 |
| 5.6E-06 | -1E-04  | 0.00081 | -0.0003 | -0.0004 | 0.0005  |
| 5.6E-06 | -0.0005 | 0.00175 | 0.00011 | 0.00087 | -0.0002 |
| 5.6E-06 | -9E-05  | 0.00077 | 0.00108 | 0.00043 | 0.00032 |
| 5.7E-06 | 0.00028 | 0.00151 | 0.00068 | 0.00013 | 9E-05   |
| 5.7E-06 | -3E-05  | 0.00152 | 0.00125 | 0.00058 | 0.00051 |
| 5.7E-06 | -0.0005 | 0.00178 | -4E-05  | 0.001   | 0.00065 |

|         |         |         |         |         |         |
|---------|---------|---------|---------|---------|---------|
| 5.8E-06 | -0.0005 | 0.00175 | -0.0008 | -0.0005 | 0.00096 |
| 5.8E-06 | -0.0008 | 0.00175 | -0.0005 | -0.0004 | 0.00134 |
| 5.8E-06 | -0.0004 | 0.00125 | 0.00071 | 0.00057 | 0.00065 |
| 5.9E-06 | -0.0003 | 0.00167 | -0.0011 | 0.00101 | 0.00083 |
| 5.9E-06 | -2E-05  | 0.00093 | -1E-05  | 0.00026 | 0.00045 |
| 5.9E-06 | -0.0002 | 0.00143 | -0.0011 | 0.00028 | -0.0005 |
| 6E-06   | -4E-05  | 0.00152 | 0.00035 | 0.00026 | -0.0005 |
| 6E-06   | 0.00021 | 0.00121 | -8E-05  | -2E-05  | 0.00042 |
| 6E-06   | 5.3E-05 | 0.00077 | -7E-05  | 0.00038 | 0.00038 |
| 6E-06   | -6E-05  | 0.00132 | -0.0005 | 0.0007  | 0.00015 |
| 6.1E-06 | 0.0003  | 0.00138 | 0.00018 | 0.00058 | -0.0004 |
| 6.1E-06 | -1E-05  | 0.00085 | 0.00052 | 0.00057 | 0.00029 |
| 6.1E-06 | 0.00014 | 0.0008  | 0.00016 | 0.00045 | 0.00097 |
| 6.2E-06 | -0.0003 | 0.00158 | 3E-05   | 0.0004  | 0.00064 |
| 6.2E-06 | -3E-05  | 0.00129 | 4.4E-05 | 0.00086 | 0.00039 |
| 6.2E-06 | -0.0003 | 0.00166 | 5.8E-05 | 0.00099 | -7E-06  |
| 6.3E-06 | 0.00014 | 0.00137 | -0.0001 | 0.00093 | 0.00078 |
| 6.3E-06 | -0.0004 | 0.00149 | 0.00024 | 0.00036 | 0.00032 |
| 6.3E-06 | 0.00041 | 0.00145 | 0.00035 | 0.00022 | 0.00039 |
| 6.4E-06 | 5.3E-05 | 0.00161 | -0.0003 | -0.0003 | 0.00066 |
| 6.4E-06 | 0.00063 | 0.00132 | 0.00016 | 0.00047 | -0.0001 |
| 6.4E-06 | -0.0007 | 0.00138 | 0.00042 | 0.00047 | -0.0003 |
| 6.5E-06 | -4E-05  | 0.0014  | -0.0006 | 0.00029 | -0.0002 |
| 6.5E-06 | 0.00048 | 0.00136 | 0.00059 | -0.0001 | 0.00106 |
| 6.5E-06 | 0.00014 | 0.0013  | 0.00022 | 0.00026 | 0.00025 |
| 6.6E-06 | -7E-05  | 0.00156 | -0.0002 | 0.00051 | 0.00088 |
| 6.6E-06 | 0.00062 | 0.00172 | 2.2E-05 | -0.0001 | -0.0001 |
| 6.6E-06 | -0.0012 | 0.00051 | -0.0003 | 8.8E-05 | 0.00062 |
| 6.7E-06 | 0.00037 | 0.00108 | -0.0006 | 0.00023 | 0.00021 |
| 6.7E-06 | -0.0002 | 0.00127 | -0.0003 | 0.00051 | 0.00081 |
| 6.7E-06 | 0.00038 | 0.00219 | -0.0001 | 0.00047 | 0.00061 |
| 6.8E-06 | -0.0003 | 0.00067 | -0.0003 | 0.00074 | 0.00077 |
| 6.8E-06 | -0.0002 | 0.00156 | 0.00049 | 6.6E-05 | -0.0002 |
| 6.8E-06 | 0.00013 | 0.00094 | 0.00071 | -0.0005 | 0.00047 |
| 6.8E-06 | 0.00021 | 0.00136 | 0.00095 | 0.00019 | 0.00076 |
| 6.9E-06 | 0.00067 | 0.00084 | 0.00019 | -0.0002 | 0.00054 |
| 6.9E-06 | -8E-05  | 0.0012  | -6E-05  | 0.00078 | 8.2E-05 |
| 6.9E-06 | 0.00047 | 0.00096 | 3.3E-05 | 4.6E-05 | 3.1E-05 |
| 7E-06   | -0.0011 | 0.00085 | 0.0005  | 0.00028 | 0.0004  |
| 7E-06   | -0.0001 | 0.00149 | -5E-05  | 0.00068 | 0.00027 |
| 7E-06   | -0.0005 | 0.00083 | -0.0008 | 0.00143 | -9E-05  |
| 7.1E-06 | -0.0005 | 0.00144 | -2E-05  | 0.00042 | 0.00078 |
| 7.1E-06 | -6E-05  | 0.0013  | 0.00019 | 0.00103 | -0.0002 |
| 7.1E-06 | -0.0005 | 0.00142 | 0.0006  | 0.00019 | 0.00032 |
| 7.2E-06 | 0.00041 | 0.00118 | 0.00075 | 0.00049 | 0.00089 |
| 7.2E-06 | -0.0003 | 0.00122 | 0.0005  | 0.00031 | -0.0001 |
| 7.2E-06 | -0.0005 | 0.00142 | -0.0004 | -0.0002 | 0.00089 |
| 7.3E-06 | -0.0002 | 0.00101 | 0.00056 | -0.0003 | -4E-05  |
| 7.3E-06 | -0.0006 | 0.00086 | 0.00036 | 0.00012 | -4E-05  |
| 7.3E-06 | -0.0003 | 0.00124 | 0.00015 | 1.7E-05 | 0.0005  |
| 7.4E-06 | -0.0009 | 0.00123 | 0.00028 | -7E-06  | 0.00055 |
| 7.4E-06 | 6E-05   | 0.00142 | -0.0006 | -0.0001 | 0.00053 |
| 7.4E-06 | 2.4E-05 | 0.00131 | -0.0004 | 1.5E-05 | 0.00056 |
| 7.5E-06 | 0.00022 | 0.00092 | -4E-05  | 0.00047 | 0.00026 |



|         |         |         |         |         |         |
|---------|---------|---------|---------|---------|---------|
| 7.5E-06 | 0.00049 | 0.00136 | 0.00052 | -0.0002 | 0.00013 |
| 7.5E-06 | -0.0009 | 0.00111 | 0.00025 | 0.00061 | 0.00105 |
| 7.6E-06 | -0.0004 | 0.00159 | 0.00015 | 0.00027 | 0.0004  |
| 7.6E-06 | 0.00021 | 0.00134 | 0.00067 | -5E-05  | 0.0002  |
| 7.6E-06 | 1.4E-05 | 0.00135 | 5.9E-05 | 0.0006  | 0.00094 |
| 7.6E-06 | 0.00021 | 0.00189 | 0.00011 | 0.00074 | 0.00027 |
| 7.7E-06 | 2.4E-05 | 0.00158 | -0.0011 | 0.00013 | 0.00013 |
| 7.7E-06 | 0.00016 | 0.00142 | 0.00016 | -0.0003 | 4.8E-05 |
| 7.7E-06 | 0.00026 | 0.00103 | 0.0004  | -0.0003 | 0.00052 |
| 7.8E-06 | -0.0002 | 0.00102 | -0.0008 | 0.00034 | -0.0003 |
| 7.8E-06 | -0.0008 | 0.00158 | -0.0005 | 0.00068 | 3.9E-06 |
| 7.8E-06 | 8.7E-05 | 0.00093 | 0.00095 | 0.00039 | 0.00077 |
| 7.9E-06 | 0.00077 | 0.00155 | 0.00036 | -7E-05  | 0.00052 |
| 7.9E-06 | -0.0004 | 0.00157 | 0.00053 | 0.00021 | 0.00047 |
| 7.9E-06 | 0.00017 | 0.00147 | -4E-05  | 0.0007  | 0.00021 |
| 8E-06   | 0.00077 | 0.00108 | -9E-05  | -0.0001 | -0.0004 |
| 8E-06   | 0.00018 | 0.00143 | -0.0002 | -0.0006 | -0.0004 |
| 8E-06   | 0.00062 | 0.00126 | 0.00039 | 0.00068 | 0.00013 |
| 8.1E-06 | -0.0002 | 0.00132 | 3.3E-05 | 0.00022 | -0.0004 |
| 8.1E-06 | 0.0007  | 0.00065 | 5.5E-05 | -0.0002 | 0.00016 |
| 8.1E-06 | -0.0002 | 0.00065 | 0.00103 | 0.00018 | 0.00012 |
| 8.2E-06 | 5.2E-05 | 0.00122 | 0.00027 | 0.00061 | 0.00054 |
| 8.2E-06 | -0.0001 | 0.00095 | -0.0001 | 9.2E-05 | -0.0003 |
| 8.2E-06 | -0.0004 | 0.00124 | 0.00034 | 0.00124 | 0.00011 |
| 8.3E-06 | 0.0007  | 0.00117 | 0.00011 | 0.00026 | 0.00076 |
| 8.3E-06 | 0.00078 | 0.00079 | 0.00032 | 0.00039 | 0.00107 |
| 8.3E-06 | 0.00064 | 0.00139 | 0.00102 | 0.0015  | -0.0001 |
| 8.4E-06 | -0.0005 | 0.00095 | 0.00033 | 0.00081 | 0.00048 |
| 8.4E-06 | 3.6E-05 | 0.00195 | 0.00044 | 0.00026 | 0.00052 |
| 8.4E-06 | 0.00013 | 0.00079 | 0.00065 | 0.00046 | 0.00061 |
| 8.4E-06 | -0.0003 | 0.00121 | 0.0004  | -0.0004 | -7E-05  |
| 8.5E-06 | -0.0007 | 0.00122 | 0.00016 | 0.00031 | 0.00084 |
| 8.5E-06 | -0.0003 | 0.00169 | -7E-05  | 0.00043 | 0.00081 |
| 8.5E-06 | 0.00054 | 0.00089 | -0.0005 | 0.00032 | 0.00075 |
| 8.6E-06 | -0.0003 | 0.00061 | -0.0001 | -4E-05  | 0.00022 |
| 8.6E-06 | 0.00031 | 0.00125 | 0.00062 | 0.00084 | 0.00065 |
| 8.6E-06 | -0.0003 | 0.00124 | 0.00039 | 0.00052 | 8.8E-05 |
| 8.7E-06 | -0.0007 | 0.00125 | 0.00033 | 0.0007  | 0.00022 |
| 8.7E-06 | -0.0005 | 0.00053 | 0.00023 | -4E-05  | 0.00021 |
| 8.7E-06 | -0.0002 | 0.00151 | -0.0002 | 0.0001  | 0.00072 |
| 8.8E-06 | -0.0007 | 0.00096 | -0.0004 | 0.00084 | -0.0001 |
| 8.8E-06 | -0.0008 | 0.00097 | -0.0003 | 0.00118 | 0.00029 |
| 8.8E-06 | -0.0002 | 0.00133 | 0.00077 | 0.00094 | 0.00088 |
| 8.9E-06 | -0.0006 | 0.00118 | 0.00075 | 0.00028 | 0.00016 |
| 8.9E-06 | 0.00088 | 0.00133 | 0.00025 | 0.00016 | -5E-05  |
| 8.9E-06 | 0.00033 | 0.00061 | 0.00074 | -0.0005 | 0.00021 |
| 9E-06   | -0.0005 | 0.00115 | 0.00049 | 0.00046 | 0.00057 |
| 9E-06   | -0.0003 | 0.00131 | 0.00014 | 0.00023 | 0.00062 |
| 9E-06   | 0.00027 | 0.00159 | -5E-05  | 0.00107 | 0.0004  |
| 9.1E-06 | 0.00031 | 0.00091 | 0.00033 | 0.00026 | 0.00056 |
| 9.1E-06 | -0.0009 | 0.00093 | 0.00031 | 0.0009  | 0.00073 |
| 9.1E-06 | -0.0003 | 0.00121 | 0.00026 | 0.00045 | 0.0003  |
| 9.2E-06 | -0.0008 | 0.00127 | -0.0012 | 0.00093 | 0.0007  |
| 9.2E-06 | 0.00058 | 0.00083 | -0.0007 | -0.0002 | 0.00049 |

|         |         |         |         |         |         |
|---------|---------|---------|---------|---------|---------|
| 9.2E-06 | 0.00057 | 0.00129 | 0.00018 | 0.00048 | 9.3E-05 |
| 9.2E-06 | 0.00055 | 0.00098 | 0.00042 | -7E-05  | -0.0002 |
| 9.3E-06 | 0.00023 | 0.00091 | -0.0006 | -0.0008 | 0.00021 |
| 9.3E-06 | -0.0004 | 0.00112 | 0.00013 | 0.00056 | 0.00012 |
| 9.3E-06 | -0.0004 | 0.00126 | -0.0002 | 0.00021 | 0.00055 |
| 9.4E-06 | -0.0002 | 0.00066 | 0.00028 | -2E-05  | 0.00022 |
| 9.4E-06 | -0.0003 | 0.00054 | -0.0005 | 0.00023 | 0.00056 |
| 9.4E-06 | -4E-05  | 0.00131 | 0.0001  | -0.0002 | 2.3E-05 |
| 9.5E-06 | 0.00062 | 0.00021 | 0.00022 | -0.0005 | -7E-05  |
| 9.5E-06 | -0.001  | 0.00121 | 0.0004  | 0.00025 | 0.00059 |
| 9.5E-06 | -0.0007 | 0.00046 | 0.00054 | 0.00108 | -0.0002 |
| 9.6E-06 | -1E-05  | 0.00131 | 0.00037 | 0.00029 | 0.00027 |
| 9.6E-06 | 0.00018 | 0.00089 | -0.0004 | -0.0004 | 0.00028 |
| 9.6E-06 | -0.0005 | 0.0014  | 0.00043 | 9.8E-05 | 0.00048 |
| 9.7E-06 | -0.0006 | 0.00124 | -0.0004 | 0.00014 | 0.00075 |
| 9.7E-06 | -0.0004 | 0.00094 | 0.00077 | 0.00037 | 8.2E-05 |
| 9.7E-06 | 0.00029 | 0.00079 | 0.00065 | 0.00015 | -0.0004 |
| 9.8E-06 | 0.00058 | 0.00108 | 0.0007  | 0.0006  | 0.00061 |
| 9.8E-06 | 0.00015 | 0.00084 | -0.0004 | -0.0003 | 0.00013 |
| 9.8E-06 | -0.0002 | 0.00112 | -7E-05  | -0.0005 | 0.00066 |
| 9.9E-06 | -0.0008 | 0.00126 | 0.00069 | 0.00011 | 0.00043 |
| 9.9E-06 | 0.00036 | 0.00109 | 0.00036 | -0.0004 | 0.00106 |
| 9.9E-06 | -0.0005 | 0.00084 | -0.0005 | -0.0008 | 0.00083 |
| 1E-05   | -0.0007 | 0.00104 | 0.00039 | -0.0002 | 0.00066 |
| 1E-05   | 6.2E-05 | 0.00156 | 0.00081 | -8E-05  | 0.00065 |
| 1E-05   | -0.0005 | 0.00159 | 0.00047 | 0.00029 | -0.0001 |
| 1E-05   | -0.0006 | 0.0012  | -0.0001 | 0.00023 | 0.00085 |
| 1E-05   | -0.0008 | 0.00146 | 0.00066 | 3.3E-05 | 0.00081 |
| 1E-05   | 0.00057 | 0.00053 | 0.00062 | 1.3E-05 | -0.0004 |
| 1E-05   | -0.0014 | 0.00082 | 0.00047 | 0.00098 | 0.00026 |
| 1E-05   | -0.0012 | 0.00087 | 0.00101 | 0.00058 | 0.00065 |
| 1E-05   | -0.0005 | 0.00035 | -4E-05  | 0.00099 | 0.00037 |
| 1E-05   | -0.0001 | 0.00111 | 0.00031 | 0.00078 | 0.00106 |
| 1E-05   | 0.00033 | 0.00173 | 0.00015 | 0.00094 | 0.00084 |
| 1E-05   | -0.0006 | 0.00041 | 0.00012 | 0.00038 | 0.00121 |
| 1E-05   | 0.00055 | 0.00048 | -0.0002 | 0.00104 | 0.00037 |
| 1E-05   | 8.6E-06 | 0.00051 | 0.00102 | 0.00076 | 0.00086 |
| 1E-05   | -0.0006 | 0.00099 | -2E-05  | 0.00094 | 0.00109 |
| 1E-05   | -0.0002 | 0.00109 | -0.0004 | 0.00082 | 0.00102 |
| 1E-05   | 0.00035 | 0.00155 | 0.0002  | -0.0004 | 0.00043 |
| 1.1E-05 | -0.0002 | 0.00131 | 0.00066 | 0.0008  | 0.00095 |
| 1.1E-05 | -0.0003 | 0.00083 | 0.0001  | 0.00076 | 0.00054 |
| 1.1E-05 | -0.0004 | 0.00118 | 0.00054 | 0.00031 | 0.00064 |
| 1.1E-05 | 0.00105 | 0.00149 | -0.0003 | 0.0006  | 0.00061 |
| 1.1E-05 | 0.00065 | 0.0015  | 0.00078 | 0.00055 | 0.00081 |
| 1.1E-05 | 0.00034 | 0.00073 | 0.00015 | -6E-05  | -0.0001 |
| 1.1E-05 | -0.0001 | 0.00092 | 0.00027 | 0.00071 | -1E-05  |
| 1.1E-05 | -0.0005 | 0.00073 | -0.0005 | 0.00024 | 0.00073 |
| 1.1E-05 | 0.00027 | 0.00179 | 0.00022 | -0.0002 | 0.00109 |
| 1.1E-05 | -8E-05  | 0.00157 | 5.5E-05 | -7E-05  | 0.00075 |
| 1.1E-05 | -0.0005 | 0.00152 | 0.00053 | 0.0001  | 0.00029 |
| 1.1E-05 | -0.0002 | 0.00136 | 0.0004  | 0.00012 | 0.00054 |
| 1.1E-05 | 0.00053 | 0.00118 | 0.00018 | 0.00024 | 0.00017 |
| 1.1E-05 | 0.00039 | 0.00135 | 0.00032 | 2.2E-05 | -0.0003 |

|         |         |         |         |         |         |
|---------|---------|---------|---------|---------|---------|
| 1.1E-05 | 0.00036 | 0.00211 | -8E-05  | -0.0006 | 0.0003  |
| 1.1E-05 | 9.9E-05 | -0.0005 | 6.3E-05 | -0.0001 | 0.00047 |
| 1.1E-05 | 0.00018 | 0.00097 | 0.00039 | -0.0008 | 0.00084 |
| 1.1E-05 | -9E-05  | 0.00186 | -0.0004 | 0.00083 | 9E-05   |
| 1.1E-05 | 0.00036 | 0.00132 | -0.0009 | 0.0014  | -7E-05  |
| 1.1E-05 | -0.0001 | 0.00075 | 0.00015 | 0.00015 | 0.00072 |
| 1.1E-05 | 0.00023 | 0.00058 | -0.0002 | 0.00065 | 0.00018 |
| 1.1E-05 | 0.00028 | 0.00075 | 0.00024 | -0.0006 | 0.00042 |
| 1.1E-05 | -0.0001 | 0.0015  | 0.00037 | -0.0004 | 0.00081 |
| 1.1E-05 | -5E-05  | 0.00114 | 0.00015 | 0.00022 | -0.0008 |
| 1.1E-05 | 0.00073 | 0.00102 | 0.00069 | 0.00022 | 1E-04   |
| 1.1E-05 | -9E-07  | 0.00084 | 0.00013 | 0.00095 | 0.00015 |
| 1.1E-05 | 5.7E-06 | 0.0003  | 0.00045 | -0.0002 | -0.0002 |
| 1.1E-05 | -0.0005 | 0.00145 | -0.0003 | 0.0001  | 0.00048 |
| 1.1E-05 | -0.0003 | 0.00045 | 0.0002  | 0.00068 | 0.00021 |
| 1.1E-05 | 0.00056 | 0.00214 | -0.0002 | 0.00057 | 0.00048 |
| 1.1E-05 | -0.0003 | 0.00191 | -8E-05  | -0.0001 | 0.00028 |
| 1.1E-05 | -0.0009 | 0.00116 | 0.00071 | 0.00022 | 0.00074 |
| 1.2E-05 | 0.00027 | 0.0018  | 0.00065 | -0.0002 | 0.00014 |
| 1.2E-05 | -0.0002 | 0.00114 | 0.00059 | -2E-05  | 0.00073 |
| 1.2E-05 | -0.0003 | 0.00112 | -0.0004 | 0.0003  | 0.00077 |
| 1.2E-05 | -0.0001 | 0.00113 | 0.00082 | 0.00036 | 0.00055 |
| 1.2E-05 | -0.0002 | 0.00153 | 0.00071 | 0.00098 | 0.00077 |
| 1.2E-05 | -0.0003 | 0.00127 | 0.0003  | -0.0002 | 0.00047 |
| 1.2E-05 | -5E-05  | 0.00167 | -0.0004 | 0.00059 | -0.0004 |
| 1.2E-05 | -0.0007 | 0.00116 | -0.0001 | -0.0002 | 0.00068 |
| 1.2E-05 | 0.00028 | 0.00145 | 2.8E-06 | -6E-05  | 0.00095 |
| 1.2E-05 | -0.0002 | 0.00058 | 0.00018 | 0.00037 | 0.00041 |
| 1.2E-05 | 0.00034 | 0.00044 | -0.0006 | 0.00036 | 0.00038 |
| 1.2E-05 | -0.0005 | 0.00117 | 2.9E-05 | 0.00063 | 0.00037 |
| 1.2E-05 | 0.00062 | 0.00133 | 8.8E-07 | 0.00023 | 0.00071 |
| 1.2E-05 | 0.00012 | 0.00085 | 0.00027 | -0.0002 | 0.00095 |
| 1.2E-05 | -0.0004 | 0.00112 | 0.00114 | 0.00083 | 0.0008  |
| 1.2E-05 | 0.00067 | 0.00043 | 0.00043 | 3.7E-05 | 0.00059 |
| 1.2E-05 | -0.0005 | 0.00072 | 0.00038 | -0.0001 | 2E-05   |
| 1.2E-05 | 0.00014 | 0.00132 | 0.00046 | -8E-05  | 0.0004  |
| 1.2E-05 | -0.0008 | 0.00117 | 0.00041 | 0.00063 | -0.0002 |
| 1.2E-05 | -9E-05  | 0.00112 | 0.00064 | 0.00046 | 0.00091 |
| 1.2E-05 | 0.00045 | 0.00102 | 0.00011 | -3E-06  | -0.0004 |
| 1.2E-05 | -0.0006 | 0.00028 | 0.00039 | 0.00028 | 0.00011 |
| 1.2E-05 | -2E-05  | 0.00018 | 0.00039 | 0.00041 | 0.00034 |
| 1.2E-05 | -0.0002 | 0.00098 | -0.0003 | 0.00144 | 0.00052 |
| 1.2E-05 | -0.0004 | 0.00118 | -0.0003 | -0.0002 | 2.5E-05 |
| 1.2E-05 | -0.0002 | 0.00052 | 6.6E-05 | -9E-05  | -0.0004 |
| 1.2E-05 | -7E-05  | 0.00115 | 0.00061 | 0.0005  | 0.00029 |
| 1.2E-05 | 0.00023 | 0.00162 | 0.0006  | 0.00043 | 0.00077 |
| 1.2E-05 | -0.0001 | 0.00119 | 0.00042 | 0.00079 | 0.00091 |
| 1.2E-05 | -0.0006 | 0.00083 | -0.0002 | 0.00097 | 0.00023 |
| 1.2E-05 | -0.0007 | 0.00106 | 0.00032 | -5E-05  | 8.5E-05 |
| 1.3E-05 | -0.0004 | 0.00085 | 0.00062 | -0.0006 | 0.0005  |
| 1.3E-05 | 5.4E-05 | 0.00096 | 3.5E-05 | 0.00049 | 0.00056 |
| 1.3E-05 | -0.0002 | 0.00183 | -0.0005 | 0.0006  | 0.00063 |
| 1.3E-05 | 0.00038 | 0.00177 | 0.00057 | 0.00037 | 0.00047 |
| 1.3E-05 | -0.0005 | 0.00042 | 0.00064 | 0.00026 | 0.00054 |

|         |         |         |         |         |         |
|---------|---------|---------|---------|---------|---------|
| 1.3E-05 | 0.00048 | 0.0009  | -1E-05  | 0.00032 | 0.00056 |
| 1.3E-05 | 0.00028 | 0.00168 | 9.3E-06 | 2.8E-05 | -1E-04  |
| 1.3E-05 | -4E-05  | 0.00108 | -3E-08  | 0.00123 | 0.00052 |
| 1.3E-05 | -0.0007 | 0.0013  | 0.0007  | 0.00042 | -0.0002 |
| 1.3E-05 | 9.1E-05 | 0.00012 | 0.00013 | 0.00029 | 0.00105 |
| 1.3E-05 | 6.4E-05 | 0.00025 | 5.3E-05 | 0.00047 | 0.00089 |
| 1.3E-05 | -0.0006 | 0.00081 | 0.00024 | 0.00095 | 0.00072 |
| 1.3E-05 | -0.0001 | 0.00067 | -0.0002 | 0.00097 | 0.00098 |
| 1.3E-05 | -0.0008 | 0.00052 | 7.9E-06 | 0.00027 | 0.00013 |
| 1.3E-05 | 0.00087 | -0.0003 | 0.00046 | 0.00108 | 0.00018 |
| 1.3E-05 | 0.00031 | 0.00024 | 0.00031 | 0.00031 | 0.00098 |
| 1.3E-05 | 0.00022 | 0.00134 | 0.00069 | -0.0003 | 0.00043 |
| 1.3E-05 | -0.0002 | 0.00068 | 0.0002  | 0.0005  | 0.00065 |
| 1.3E-05 | -0.0005 | 0.00063 | -0.0002 | 0.00062 | 0.0007  |
| 1.3E-05 | -0.0004 | 0.00112 | 0.00011 | 0.00049 | 0.00029 |
| 1.3E-05 | -0.0001 | 0.00023 | 0.00033 | 0.00036 | 0.00175 |
| 1.3E-05 | -7E-05  | 0.00047 | 0.00054 | -8E-06  | 0.00093 |
| 1.3E-05 | 0.00057 | 0.00158 | -0.0005 | -2E-05  | 0.0002  |
| 1.3E-05 | 8.9E-06 | 0.00071 | -0.0004 | 0.00061 | 0.00027 |
| 1.3E-05 | -0.0003 | 0.00073 | -0.0007 | 1.7E-05 | 0.00052 |
| 1.3E-05 | -1E-05  | 0.00106 | -0.0003 | 0.00024 | 0.00044 |
| 1.3E-05 | 9.1E-05 | 0.00063 | -0.0002 | -6E-05  | 0.00086 |
| 1.3E-05 | -0.0001 | 0.00175 | -0.0008 | 0.0005  | 0.00094 |
| 1.3E-05 | -0.0003 | 0.00177 | -0.0001 | 0.00025 | 0.00039 |
| 1.3E-05 | -0.0001 | 0.00093 | 9.2E-05 | -0.0002 | -0.0003 |
| 1.3E-05 | -0.0003 | 0.00087 | 0.00034 | 0.00026 | -0.0002 |
| 1.4E-05 | -0.0002 | 0.00039 | -0.0002 | 0.00022 | 0.0002  |
| 1.4E-05 | -7E-05  | 7.2E-05 | -0.0003 | 0.0004  | -0.0006 |
| 1.4E-05 | -0.0004 | 0.00028 | 0.00066 | 0.00023 | 0.00051 |
| 1.4E-05 | -0.0001 | 0.00131 | 0.00041 | 0.00011 | -0.0002 |
| 1.4E-05 | -0.0006 | 0.00087 | 0.00066 | 3.5E-05 | 0.00035 |
| 1.4E-05 | -0.0007 | 0.00187 | -0.0002 | 0.00046 | 0.00024 |
| 1.4E-05 | -0.0002 | 0.00032 | -0.0002 | 0.00059 | 1.6E-06 |
| 1.4E-05 | -0.0002 | 0.00133 | 0.00018 | 0.00076 | 0.00023 |
| 1.4E-05 | -0.0005 | 0.00086 | 0.0006  | 1.6E-05 | 0.00046 |
| 1.4E-05 | 0.00012 | 0.0004  | 0.00031 | 0.00014 | 0.0001  |
| 1.4E-05 | -0.0006 | 0.00139 | -0.0005 | 0.00046 | 0.00028 |
| 1.4E-05 | -3E-05  | 0.00154 | 0.00044 | -0.0002 | -0.0004 |
| 1.4E-05 | -0.0007 | 0.00167 | 0.00034 | 0.00022 | 0.00015 |
| 1.4E-05 | -5E-06  | 0.00109 | -9E-05  | 0.00014 | -0.0002 |
| 1.4E-05 | -0.0002 | 0.00063 | -0.0001 | 0.00033 | 0.00027 |
| 1.4E-05 | -0.0001 | 0.00127 | 2.3E-05 | 0.00109 | 0.00026 |
| 1.4E-05 | -0.0004 | 0.00011 | 2.8E-05 | 0.00034 | 0.00015 |
| 1.4E-05 | 0.00013 | 0.0012  | 0.0004  | 4.1E-05 | 0.00055 |
| 1.4E-05 | -0.0003 | 0.00065 | 0.0003  | 0.00012 | 0.00045 |
| 1.4E-05 | -0.0005 | 0.00059 | 0.00066 | 0.00043 | -0.0005 |
| 1.4E-05 | 0.0002  | 0.0008  | 8.5E-05 | 0.00022 | -0.0004 |
| 1.4E-05 | 0.00032 | 0.00051 | 0.00047 | 0.00047 | 0.00025 |
| 1.4E-05 | 0.00032 | 0.00084 | 0.00019 | 0.00061 | 0.00018 |
| 1.4E-05 | -7E-05  | 0.00098 | 0.00068 | 0.00039 | 0.0002  |
| 1.4E-05 | -0.0003 | 0.00133 | -0.0007 | 5.4E-05 | 0.00025 |
| 1.4E-05 | -0.0005 | 0.00111 | -0.0002 | 0.00082 | 0.00049 |
| 1.4E-05 | -0.0003 | 8.3E-05 | -7E-05  | 0.00064 | 0.00029 |
| 1.4E-05 | -0.0003 | 0.00065 | 0.00103 | 0.00051 | 3.6E-05 |

|         |         |         |         |         |         |
|---------|---------|---------|---------|---------|---------|
| 1.4E-05 | -0.0004 | 0.00125 | 0.00012 | -0.0006 | 0.00105 |
| 1.4E-05 | -0.0005 | 0.00069 | -0.0003 | -5E-05  | 0.00017 |
| 1.4E-05 | -0.0006 | 0.00112 | -0.0004 | 0.00102 | 0.00047 |
| 1.5E-05 | 0.00012 | 0.00028 | 0.00014 | -0.0003 | -0.0005 |
| 1.5E-05 | -0.0008 | 0.00083 | -6E-05  | -0.0004 | -0.0005 |
| 1.5E-05 | -5E-05  | 0.00066 | -9E-05  | -9E-06  | -6E-06  |
| 1.5E-05 | -0.0006 | 0.00107 | -0.0001 | 0.00064 | -1E-05  |
| 1.5E-05 | -0.0002 | 0.00126 | -0.0004 | 3.5E-05 | -0.0002 |
| 1.5E-05 | -0.001  | 0.00053 | -4E-05  | 0.00042 | 0.00057 |
| 1.5E-05 | -0.0003 | 0.00092 | -0.0004 | -6E-05  | -0.0002 |
| 1.5E-05 | -0.0008 | 0.00066 | 0.00012 | 0.00042 | 0.00039 |
| 1.5E-05 | -0.0004 | 0.00051 | -0.0004 | 0.00061 | 0.00044 |
| 1.5E-05 | 4.3E-05 | 0.00133 | -0.0008 | -4E-05  | 0.00066 |
| 1.5E-05 | 3.6E-05 | 3.5E-05 | -0.0005 | -0.0001 | 0.00017 |
| 1.5E-05 | -0.0003 | 0.00123 | -0.0001 | 0.00054 | 0.00096 |
| 1.5E-05 | -0.0003 | 0.00074 | -0.0006 | 0.0002  | 0.00066 |
| 1.5E-05 | -0.0002 | 0.00037 | -0.0002 | 0.00064 | 0.00031 |
| 1.5E-05 | -0.0008 | 0.00077 | -0.0003 | -0.0002 | 0.00083 |
| 1.5E-05 | -0.0002 | -0.0004 | -0.0002 | 0.00026 | 0.00061 |

**Table SI.2B:** Primary kinetic data for the reaction of 2-pyrrolidone (**S2**) with CumO• generated by 355 nm LFP in DMSO (**Figure SI.2B**).

| t / s   | $\Delta A$ 2-pyrrolidinone ( <b>S2</b> ) |               |               |               |               |
|---------|------------------------------------------|---------------|---------------|---------------|---------------|
|         | <b>0.0324M</b>                           | <b>0.130M</b> | <b>0.226M</b> | <b>0.352M</b> | <b>0.476M</b> |
| -1E-06  | 0.00081                                  | -0.0006       | 0.00035       | 0.00037       | -3E-05        |
| -1E-06  | 0.00133                                  | -0.0002       | 0.00012       | -1E-05        | 0.00092       |
| -9E-07  | 0.0007                                   | -0.0011       | -0.0004       | -0.0003       | 0.00103       |
| -9E-07  | 0.00061                                  | -2E-05        | -0.0012       | 0.00037       | 0.00055       |
| -9E-07  | 0.00033                                  | 0.00089       | -0.0002       | 0.00057       | 0.00082       |
| -8E-07  | 0.00109                                  | 0.00034       | 0.00033       | 7.8E-05       | 0.0008        |
| -8E-07  | 0.00116                                  | 0.00039       | 0.0006        | -0.0001       | 0.00087       |
| -8E-07  | 0.00078                                  | -0.0008       | -0.0003       | 0.00074       | 0.00071       |
| -7E-07  | 0.00082                                  | 0.00036       | 0.00025       | 0.00029       | 0.00159       |
| -7E-07  | 0.00075                                  | -0.0003       | 0.00021       | -0.0003       | 0.00084       |
| -7E-07  | -2E-05                                   | -0.0007       | -2E-05        | 6.1E-05       | 0.00099       |
| -6E-07  | 0.0013                                   | -0.0004       | -0.0001       | 0.00057       | 0.0006        |
| -6E-07  | 0.00018                                  | 7.9E-05       | 0.00035       | -0.0003       | 0.00121       |
| -6E-07  | 0.00035                                  | 0.00021       | -0.0003       | -0.0003       | 0.00102       |
| -5E-07  | 0.0012                                   | -0.0004       | -0.0003       | 3.1E-06       | 0.00106       |
| -5E-07  | 0.00047                                  | 0.00054       | 0.00038       | -0.0002       | 0.00023       |
| -5E-07  | 0.00057                                  | 0.0009        | -0.0006       | -0.0004       | 0.00087       |
| -4E-07  | 0.00123                                  | -0.0003       | -0.0002       | -0.0003       | 0.00161       |
| -4E-07  | 0.00171                                  | -0.0005       | -7E-06        | -0.0002       | 0.00075       |
| -4E-07  | 0.0004                                   | -2E-06        | -0.0006       | -0.0004       | 0.00096       |
| -4E-07  | 0.00039                                  | 0.00025       | 0.00018       | -6E-05        | 0.00086       |
| -3E-07  | 0.00111                                  | 0.00045       | -0.0001       | 0.00084       | 0.00057       |
| -3E-07  | 0.00025                                  | 3.9E-05       | 0.00014       | -0.0002       | 0.00035       |
| -3E-07  | 0.00021                                  | 0.00032       | 0.00011       | 0.00011       | 0.00093       |
| -2E-07  | 0.00056                                  | -0.0002       | -0.0002       | -0.0006       | 0.00056       |
| -2E-07  | -0.0002                                  | 7.8E-05       | -0.0002       | -0.001        | 0.00042       |
| -2E-07  | 0.00071                                  | -0.0003       | -0.0007       | -5E-05        | 0.00079       |
| -1E-07  | 0.00089                                  | -3E-05        | -0.0002       | -0.0002       | 0.00029       |
| -1E-07  | 0.00074                                  | -0.0001       | -0.0005       | -0.0008       | 0.00023       |
| -6E-08  | 0.00161                                  | 0.00066       | -0.0008       | -2E-05        | 0.00109       |
| -3E-08  | 0.0009                                   | -0.0002       | -0.0008       | -0.0004       | 0.00044       |
| -2E-10  | -0.0032                                  | -0.0041       | -0.0035       | -0.003        | -0.0024       |
| 3.2E-08 | -0.0138                                  | -0.019        | -0.019        | -0.0197       | -0.0165       |
| 6.4E-08 | 0.02249                                  | 0.0154        | 0.01232       | 0.00811       | 0.00681       |
| 9.6E-08 | 0.0259                                   | 0.02197       | 0.02219       | 0.0208        | 0.02051       |
| 1.3E-07 | 0.02611                                  | 0.02163       | 0.0215        | 0.01915       | 0.01947       |
| 1.6E-07 | 0.02532                                  | 0.01985       | 0.02072       | 0.01781       | 0.01894       |
| 1.9E-07 | 0.02458                                  | 0.01946       | 0.01902       | 0.01728       | 0.01798       |
| 2.2E-07 | 0.02376                                  | 0.01943       | 0.01843       | 0.01581       | 0.01648       |
| 2.6E-07 | 0.02396                                  | 0.01896       | 0.01679       | 0.01551       | 0.01477       |
| 2.9E-07 | 0.02139                                  | 0.01751       | 0.01651       | 0.01447       | 0.01386       |
| 3.2E-07 | 0.02182                                  | 0.01715       | 0.01509       | 0.01385       | 0.01305       |
| 3.5E-07 | 0.02167                                  | 0.01609       | 0.01525       | 0.01226       | 0.01172       |
| 3.8E-07 | 0.02039                                  | 0.01565       | 0.01443       | 0.013         | 0.01188       |
| 4.2E-07 | 0.02055                                  | 0.01536       | 0.0135        | 0.0117        | 0.01055       |
| 4.5E-07 | 0.01946                                  | 0.01504       | 0.01343       | 0.01055       | 0.00913       |
| 4.8E-07 | 0.01858                                  | 0.01411       | 0.01243       | 0.0098        | 0.01023       |
| 5.1E-07 | 0.01727                                  | 0.01401       | 0.01117       | 0.00953       | 0.009         |
| 5.4E-07 | 0.01771                                  | 0.01342       | 0.01142       | 0.00901       | 0.00856       |

|         |         |         |         |         |         |
|---------|---------|---------|---------|---------|---------|
| 5.8E-07 | 0.01682 | 0.01242 | 0.01082 | 0.00801 | 0.00775 |
| 6.1E-07 | 0.01711 | 0.01274 | 0.0098  | 0.00753 | 0.00757 |
| 6.4E-07 | 0.01623 | 0.012   | 0.00978 | 0.00799 | 0.00591 |
| 6.7E-07 | 0.01663 | 0.01156 | 0.0085  | 0.00715 | 0.00637 |
| 7E-07   | 0.01607 | 0.01028 | 0.00863 | 0.00696 | 0.00609 |
| 7.4E-07 | 0.01507 | 0.01046 | 0.00857 | 0.00597 | 0.0058  |
| 7.7E-07 | 0.0146  | 0.01018 | 0.00814 | 0.00539 | 0.00538 |
| 8E-07   | 0.0139  | 0.0095  | 0.00737 | 0.00578 | 0.00628 |
| 8.3E-07 | 0.01489 | 0.00897 | 0.00696 | 0.00576 | 0.0048  |
| 8.6E-07 | 0.01355 | 0.00894 | 0.00711 | 0.00517 | 0.00479 |
| 9E-07   | 0.01322 | 0.00829 | 0.00669 | 0.00501 | 0.00528 |
| 9.3E-07 | 0.01317 | 0.00865 | 0.00595 | 0.00413 | 0.00453 |
| 9.6E-07 | 0.01272 | 0.00791 | 0.00592 | 0.00457 | 0.0043  |
| 9.9E-07 | 0.01157 | 0.00763 | 0.00568 | 0.00403 | 0.00366 |
| 1E-06   | 0.01181 | 0.00803 | 0.0055  | 0.00338 | 0.00431 |
| 1.1E-06 | 0.01233 | 0.00714 | 0.00526 | 0.00334 | 0.00375 |
| 1.1E-06 | 0.01179 | 0.0072  | 0.00484 | 0.00378 | 0.00317 |
| 1.1E-06 | 0.01153 | 0.00646 | 0.00482 | 0.00405 | 0.00343 |
| 1.2E-06 | 0.01065 | 0.00587 | 0.00522 | 0.00334 | 0.00298 |
| 1.2E-06 | 0.01107 | 0.00722 | 0.00455 | 0.00315 | 0.00328 |
| 1.2E-06 | 0.01052 | 0.00578 | 0.00343 | 0.00292 | 0.00242 |
| 1.2E-06 | 0.00922 | 0.00619 | 0.00394 | 0.00269 | 0.00314 |
| 1.3E-06 | 0.00961 | 0.00637 | 0.00393 | 0.00298 | 0.00297 |
| 1.3E-06 | 0.00877 | 0.00492 | 0.00422 | 0.00257 | 0.00292 |
| 1.3E-06 | 0.00923 | 0.00459 | 0.00351 | 0.00227 | 0.00268 |
| 1.4E-06 | 0.00956 | 0.00524 | 0.0036  | 0.00201 | 0.00248 |
| 1.4E-06 | 0.00901 | 0.0048  | 0.00369 | 0.00206 | 0.00224 |
| 1.4E-06 | 0.00905 | 0.00473 | 0.00274 | 0.00248 | 0.0029  |
| 1.5E-06 | 0.00851 | 0.00507 | 0.00223 | 0.00292 | 0.00339 |
| 1.5E-06 | 0.00867 | 0.00427 | 0.00279 | 0.00203 | 0.00243 |
| 1.5E-06 | 0.0083  | 0.00551 | 0.00225 | 0.00185 | 0.00282 |
| 1.6E-06 | 0.00692 | 0.00336 | 0.00288 | 0.00223 | 0.00253 |
| 1.6E-06 | 0.0075  | 0.00345 | 0.00258 | 0.00236 | 0.0024  |
| 1.6E-06 | 0.00779 | 0.00382 | 0.00282 | 0.00146 | 0.00173 |
| 1.7E-06 | 0.00742 | 0.00275 | 0.00231 | 0.00182 | 0.00293 |
| 1.7E-06 | 0.00749 | 0.00374 | 0.00232 | 0.00175 | 0.0032  |
| 1.7E-06 | 0.0074  | 0.00312 | 0.00184 | 0.00224 | 0.00328 |
| 1.8E-06 | 0.00679 | 0.00248 | 0.00262 | 0.00143 | 0.002   |
| 1.8E-06 | 0.00649 | 0.00324 | 0.00239 | 0.00241 | 0.00258 |
| 1.8E-06 | 0.00652 | 0.00273 | 0.00234 | 0.00157 | 0.00194 |
| 1.9E-06 | 0.00694 | 0.00341 | 0.00246 | 0.00154 | 0.00261 |
| 1.9E-06 | 0.00632 | 0.00346 | 0.00269 | 0.00114 | 0.00237 |
| 1.9E-06 | 0.00644 | 0.00363 | 0.00202 | 0.00197 | 0.00255 |
| 2E-06   | 0.00662 | 0.0018  | 0.00194 | 0.00215 | 0.00248 |
| 2E-06   | 0.00646 | 0.00276 | 0.00105 | 0.00238 | 0.00283 |
| 2E-06   | 0.00677 | 0.00288 | 0.00181 | 0.00135 | 0.00272 |
| 2E-06   | 0.00587 | 0.00177 | 0.00171 | 0.00237 | 0.00167 |
| 2.1E-06 | 0.00654 | 0.00248 | 0.00209 | 0.002   | 0.00155 |
| 2.1E-06 | 0.00565 | 0.00265 | 0.00153 | 0.00174 | 0.00192 |
| 2.1E-06 | 0.00632 | 0.00243 | 0.00164 | 0.00142 | 0.00166 |
| 2.2E-06 | 0.00516 | 0.00189 | 0.0022  | 0.00146 | 0.00207 |
| 2.2E-06 | 0.00486 | 0.00262 | 0.00204 | 0.00133 | 0.00195 |
| 2.2E-06 | 0.00453 | 0.00213 | 0.00167 | 0.00187 | 0.00212 |
| 2.3E-06 | 0.00513 | 0.00264 | 0.00256 | 0.00168 | 0.00235 |

|         |         |         |         |         |         |
|---------|---------|---------|---------|---------|---------|
| 2.3E-06 | 0.00487 | 0.00158 | 0.00179 | 0.00145 | 0.00183 |
| 2.3E-06 | 0.00498 | 0.00132 | 0.00216 | 0.0014  | 0.0018  |
| 2.4E-06 | 0.0043  | 0.00223 | 0.00246 | 0.00176 | 0.002   |
| 2.4E-06 | 0.00481 | 0.00192 | 0.00198 | 0.00127 | 0.00261 |
| 2.4E-06 | 0.00466 | 0.00299 | 0.00167 | 0.0016  | 0.00284 |
| 2.5E-06 | 0.00469 | 0.00252 | 0.00125 | 0.00157 | 0.00188 |
| 2.5E-06 | 0.00518 | 0.00167 | 0.00159 | 0.00244 | 0.00215 |
| 2.5E-06 | 0.00425 | 0.00155 | 0.00232 | 0.00189 | 0.00171 |
| 2.6E-06 | 0.00513 | 0.00171 | 0.00129 | 0.00111 | 0.0019  |
| 2.6E-06 | 0.00566 | 0.00194 | 0.00197 | 0.00146 | 0.00167 |
| 2.6E-06 | 0.00569 | 0.00197 | 0.00042 | 0.00156 | 0.00148 |
| 2.7E-06 | 0.00477 | 0.00191 | 0.00179 | 0.00185 | 0.00253 |
| 2.7E-06 | 0.00489 | 0.00138 | 0.00169 | 0.00128 | 0.00181 |
| 2.7E-06 | 0.00422 | 0.00147 | 0.00101 | 0.00147 | 0.00251 |
| 2.8E-06 | 0.00426 | 0.00166 | 0.00152 | 0.0018  | 0.00222 |
| 2.8E-06 | 0.00441 | 0.00221 | 0.0017  | 0.00114 | 0.00279 |
| 2.8E-06 | 0.00376 | 0.00197 | 0.0012  | 0.00081 | 0.00184 |
| 2.8E-06 | 0.00415 | 0.00279 | 0.00136 | 0.00078 | 0.00192 |
| 2.9E-06 | 0.00392 | 0.00095 | 0.00219 | 0.00126 | 0.00149 |
| 2.9E-06 | 0.00381 | 0.00114 | 0.00099 | 0.00179 | 0.00186 |
| 2.9E-06 | 0.0038  | 0.00145 | 0.00143 | 0.00086 | 0.00167 |
| 3E-06   | 0.00326 | 0.0009  | 0.00037 | 0.00151 | 0.00154 |
| 3E-06   | 0.0036  | 0.00156 | 0.00125 | 0.00102 | 0.00211 |
| 3E-06   | 0.00386 | 0.00181 | 0.00065 | 0.00057 | 0.00207 |
| 3.1E-06 | 0.00399 | 0.0025  | 0.0011  | 0.00119 | 0.00147 |
| 3.1E-06 | 0.00392 | 0.00107 | 0.00095 | 0.0011  | 0.00125 |
| 3.1E-06 | 0.0035  | 0.00108 | 0.00163 | 0.00098 | 0.00088 |
| 3.2E-06 | 0.00447 | 0.0016  | 0.00113 | 0.00122 | 0.00126 |
| 3.2E-06 | 0.00453 | 0.00249 | 0.00096 | 0.00064 | 0.00109 |
| 3.2E-06 | 0.00434 | 0.00185 | 0.00095 | 0.00155 | 0.00148 |
| 3.3E-06 | 0.00362 | 0.00174 | 0.00125 | 0.00143 | 0.00104 |
| 3.3E-06 | 0.0033  | 0.00181 | 0.00134 | 0.00114 | 0.00166 |
| 3.3E-06 | 0.00334 | 0.00097 | 0.00176 | 0.00165 | 0.00156 |
| 3.4E-06 | 0.00349 | 0.00235 | 0.00145 | 0.00115 | 0.0016  |
| 3.4E-06 | 0.00368 | 0.00151 | 0.00119 | 0.00118 | 0.00212 |
| 3.4E-06 | 0.00414 | 0.00145 | 0.00033 | 0.00052 | 0.00125 |
| 3.5E-06 | 0.00356 | 0.0018  | 0.00076 | 0.00027 | 0.00177 |
| 3.5E-06 | 0.00351 | 0.00097 | 0.00152 | 0.00119 | 0.00163 |
| 3.5E-06 | 0.00326 | 0.00194 | 0.00066 | 0.00022 | 0.00129 |
| 3.6E-06 | 0.00339 | 0.00148 | 0.00098 | 0.00043 | 0.00076 |
| 3.6E-06 | 0.00392 | 0.00166 | 0.00126 | 0.0016  | 0.00107 |
| 3.6E-06 | 0.00297 | 0.00096 | 0.00101 | 0.0015  | 0.00157 |
| 3.6E-06 | 0.00318 | 0.00247 | 0.00054 | 0.00025 | 0.00184 |
| 3.7E-06 | 0.00279 | 0.00086 | 0.00167 | 0.00063 | 0.00169 |
| 3.7E-06 | 0.00304 | 0.00091 | 0.00112 | 0.00057 | 0.00175 |
| 3.7E-06 | 0.00355 | 0.00117 | 0.00077 | 0.00061 | 0.00156 |
| 3.8E-06 | 0.00292 | 0.00135 | 0.00088 | 0.00069 | 0.00211 |
| 3.8E-06 | 0.0039  | 0.00113 | 0.00155 | 0.00067 | 0.00192 |
| 3.8E-06 | 0.00324 | 0.00096 | 0.00017 | 0.00106 | 0.00166 |
| 3.9E-06 | 0.0032  | 0.00144 | 0.00202 | 0.00107 | 0.00218 |
| 3.9E-06 | 0.0029  | 0.00114 | 0.00178 | 0.00096 | 0.00154 |
| 3.9E-06 | 0.00337 | 0.00099 | 0.00073 | 0.00115 | 0.00149 |
| 4E-06   | 0.00266 | 0.00163 | 0.00138 | 0.00185 | 0.00182 |
| 4E-06   | 0.00277 | 0.00122 | 0.00103 | -6E-05  | 0.00172 |



|         |         |         |         |         |         |
|---------|---------|---------|---------|---------|---------|
| 4E-06   | 0.00347 | 0.00171 | 0.00092 | 0.00046 | 0.00151 |
| 4.1E-06 | 0.00265 | 0.00174 | 0.00111 | 0.00108 | 0.00153 |
| 4.1E-06 | 0.00275 | 0.00118 | 0.00057 | 0.00038 | 0.00184 |
| 4.1E-06 | 0.00337 | 0.0012  | 0.00131 | 0.00065 | 0.00165 |
| 4.2E-06 | 0.00364 | 0.00174 | 0.00102 | 0.00055 | 0.00203 |
| 4.2E-06 | 0.00315 | 0.0014  | 0.00119 | 0.00085 | 0.00174 |
| 4.2E-06 | 0.00337 | 0.00109 | 0.00159 | 0.00082 | 0.00124 |
| 4.3E-06 | 0.00354 | 0.00195 | 0.00119 | 0.00117 | 0.00094 |
| 4.3E-06 | 0.00328 | 0.00176 | 0.00097 | 0.00127 | 0.00214 |
| 4.3E-06 | 0.00276 | 0.00118 | 0.00065 | 0.00019 | 0.00144 |
| 4.4E-06 | 0.00308 | 0.00072 | 0.00151 | 0.00114 | 0.00182 |
| 4.4E-06 | 0.00265 | 0.00124 | 0.00111 | 0.00076 | 0.00145 |
| 4.4E-06 | 0.00239 | 0.00164 | 0.00068 | 0.00093 | 0.00163 |
| 4.4E-06 | 0.00211 | 0.00181 | 0.00149 | 0.00077 | 0.00138 |
| 4.5E-06 | 0.00155 | 0.00156 | 0.0014  | 0.00106 | 0.00169 |
| 4.5E-06 | 0.00334 | 0.0011  | 0.00175 | 0.00095 | 0.00136 |
| 4.5E-06 | 0.00231 | 0.00094 | 0.00064 | 0.00088 | 0.00179 |
| 4.6E-06 | 0.00178 | 0.00101 | 0.00093 | 0.0018  | 0.00114 |
| 4.6E-06 | 0.00288 | 0.00171 | 0.00162 | 0.001   | 0.00129 |
| 4.6E-06 | 0.003   | 0.00101 | 0.0017  | 0.00052 | 0.00146 |
| 4.7E-06 | 0.00239 | 0.00131 | 0.00111 | 0.00037 | 0.00196 |
| 4.7E-06 | 0.00244 | 0.00125 | 0.00132 | 0.00039 | 0.00138 |
| 4.7E-06 | 0.00331 | 0.00138 | 0.00044 | -3E-05  | 0.00114 |
| 4.8E-06 | 0.00275 | 0.00117 | 0.0013  | 0.001   | 0.00127 |
| 4.8E-06 | 0.00243 | 0.00111 | 0.00155 | 0.00084 | 0.00107 |
| 4.8E-06 | 0.00237 | 0.00155 | 0.00134 | 0.00051 | 0.00119 |
| 4.9E-06 | 0.00199 | 0.00134 | 0.00135 | 0.00047 | 0.00168 |
| 4.9E-06 | 0.00215 | 0.00121 | 0.00109 | 0.00055 | 0.00189 |
| 4.9E-06 | 0.00281 | 0.00152 | 0.00059 | 0.00093 | 0.00141 |
| 5E-06   | 0.00255 | 0.00107 | 0.00104 | 0.00109 | 0.00172 |
| 5E-06   | 0.00308 | 0.00133 | 0.00146 | 0.0008  | 0.00207 |
| 5E-06   | 0.00242 | 0.0017  | 0.00158 | 0.00091 | 0.00128 |
| 5.1E-06 | 0.00342 | 0.00107 | 0.00084 | 0.00159 | 0.00192 |
| 5.1E-06 | 0.00308 | 0.00199 | 0.00039 | 0.0008  | 0.00126 |
| 5.1E-06 | 0.00244 | 0.00151 | 0.00085 | 0.00122 | 0.0014  |
| 5.2E-06 | 0.00329 | 0.00091 | 0.00061 | 0.00136 | 0.00123 |
| 5.2E-06 | 0.00317 | 0.00188 | 0.00115 | 0.00044 | 0.00126 |
| 5.2E-06 | 0.00261 | 0.00187 | 0.00148 | 0.00166 | 0.00195 |
| 5.2E-06 | 0.0029  | 0.00137 | 0.00149 | 0.00165 | 0.00192 |
| 5.3E-06 | 0.00131 | 0.00188 | 0.00085 | 0.00075 | 0.00263 |
| 5.3E-06 | 0.00246 | 0.00099 | 0.00096 | 0.00151 | 0.0011  |
| 5.3E-06 | 0.00165 | 0.00128 | 0.00122 | 0.00069 | 0.00122 |
| 5.4E-06 | 0.0029  | 0.00172 | 0.00131 | 0.00112 | 0.00147 |
| 5.4E-06 | 0.00261 | 0.00175 | 0.00153 | 0.00017 | 0.00146 |
| 5.4E-06 | 0.00302 | 0.0005  | 0.00057 | 0.00122 | 0.00155 |
| 5.5E-06 | 0.00309 | 0.00074 | 0.00075 | 0.00027 | 0.00181 |
| 5.5E-06 | 0.00264 | 0.00101 | 0.00112 | 0.00058 | 0.00157 |
| 5.5E-06 | 0.00197 | 0.00154 | 0.00065 | 1.1E-06 | 0.00152 |
| 5.6E-06 | 0.002   | 0.00066 | 0.00156 | 0.00115 | 0.00206 |
| 5.6E-06 | 0.00316 | 0.00126 | 0.00097 | 0.00087 | 0.00141 |
| 5.6E-06 | 0.00221 | 0.00088 | 0.00118 | 0.00096 | 0.00143 |
| 5.7E-06 | 0.00264 | 0.00136 | 0.0012  | 0.00106 | 0.00115 |
| 5.7E-06 | 0.00189 | 0.00124 | 0.0011  | 0.00015 | 0.00078 |
| 5.7E-06 | 0.00285 | 0.00093 | 0.0012  | 0.00138 | 0.00159 |

|         |         |         |         |         |         |
|---------|---------|---------|---------|---------|---------|
| 5.8E-06 | 0.00296 | 0.00162 | 0.00068 | 0.0009  | 0.00175 |
| 5.8E-06 | 0.00256 | 0.0013  | 0.00053 | 0.00037 | 0.00141 |
| 5.8E-06 | 0.00187 | 0.00063 | 0.00134 | 0.00031 | 0.00077 |
| 5.9E-06 | 0.00142 | 0.00112 | 0.00108 | 0.0008  | 0.00135 |
| 5.9E-06 | 0.00174 | 0.00116 | 2.3E-05 | 0.00106 | 0.00174 |
| 5.9E-06 | 0.00195 | 0.00119 | 0.00065 | 0.00115 | 0.00099 |
| 6E-06   | 0.00202 | 0.00102 | 0.00044 | -0.0001 | 0.00207 |
| 6E-06   | 0.00174 | 0.00074 | 0.00034 | 0.00096 | 0.0017  |
| 6E-06   | 0.00222 | 0.0012  | 0.00144 | 0.00119 | 0.00188 |
| 6E-06   | 0.00157 | 0.00137 | 0.00154 | 0.00145 | 0.00123 |
| 6.1E-06 | 0.00285 | 0.00133 | 0.00076 | 0.00143 | 0.00141 |
| 6.1E-06 | 0.00276 | 0.00229 | 0.0006  | 0.00133 | 0.00155 |
| 6.1E-06 | 0.00209 | 0.00126 | 0.00064 | 0.00118 | 0.00123 |
| 6.2E-06 | 0.00225 | 0.00078 | 0.00119 | 0.00063 | 0.00145 |
| 6.2E-06 | 0.00217 | 0.00051 | 0.00124 | 0.00047 | 0.00112 |
| 6.2E-06 | 0.00237 | 0.0014  | 0.00163 | 0.00068 | 0.00113 |
| 6.3E-06 | 0.00313 | 0.00062 | 0.00174 | 0.00139 | 0.00062 |
| 6.3E-06 | 0.00211 | 0.00147 | 0.00078 | 0.0009  | 0.00094 |
| 6.3E-06 | 0.00327 | 0.0012  | 0.00122 | 0.00019 | 0.00146 |
| 6.4E-06 | 0.00212 | 0.00074 | 0.00112 | 0.00073 | 0.00161 |
| 6.4E-06 | 0.002   | 0.00073 | 0.00129 | 0.00045 | 0.00112 |
| 6.4E-06 | 0.00326 | 0.00174 | 0.00127 | 0.00051 | 0.00134 |
| 6.5E-06 | 0.00161 | 0.00136 | 0.00063 | 0.00103 | 0.00105 |
| 6.5E-06 | 0.00234 | 0.00158 | 0.00074 | 0.0009  | 0.00091 |
| 6.5E-06 | 0.00262 | 0.00095 | 0.00209 | 0.00036 | 0.00111 |
| 6.6E-06 | 0.00312 | 0.00094 | 0.00114 | 0.00115 | 0.00141 |
| 6.6E-06 | 0.0032  | 0.00157 | 0.00113 | 0.00066 | 0.00047 |
| 6.6E-06 | 0.00191 | 0.00065 | 0.00068 | 0.00086 | 0.00112 |
| 6.7E-06 | 0.00234 | 0.00081 | 0.00093 | 0.00079 | 0.00173 |
| 6.7E-06 | 0.00192 | 0.00082 | 0.00145 | -1E-05  | 0.00178 |
| 6.7E-06 | 0.00244 | 0.00173 | 0.00069 | 0.00069 | 0.00121 |
| 6.8E-06 | 0.00209 | 0.00078 | 0.00134 | 0.00123 | 0.00199 |
| 6.8E-06 | 0.00161 | 0.00076 | 0.00055 | 0.00098 | 0.00147 |
| 6.8E-06 | 0.00219 | 0.00165 | 0.00068 | 0.00026 | 0.00142 |
| 6.8E-06 | 0.00109 | 0.00167 | 0.00119 | 0.00107 | 0.00133 |
| 6.9E-06 | 0.00203 | 0.00155 | 0.00131 | 0.00033 | 0.00124 |
| 6.9E-06 | 0.00187 | 0.00043 | 0.00071 | 9.9E-05 | 0.00095 |
| 6.9E-06 | 0.00134 | 0.00102 | 0.00151 | 0.00187 | 0.00103 |
| 7E-06   | 0.00124 | 0.00128 | 0.00123 | 0.00043 | 0.00119 |
| 7E-06   | 0.00098 | 0.00135 | 0.00065 | 0.0002  | 0.00154 |
| 7E-06   | 0.0017  | 0.0008  | 0.0003  | 0.00065 | 0.00136 |
| 7.1E-06 | 0.00096 | 0.00136 | 0.00075 | 0.00105 | 0.00054 |
| 7.1E-06 | 0.00178 | 0.00162 | 0.0016  | 0.00104 | 0.00178 |
| 7.1E-06 | 0.00125 | 0.00145 | 0.00019 | 0.00074 | 0.00187 |
| 7.2E-06 | 0.00149 | 0.00094 | 0.00056 | 0.00098 | 0.00139 |
| 7.2E-06 | 0.00262 | 0.00176 | 0.00074 | 0.00049 | 0.00122 |
| 7.2E-06 | 0.00183 | 0.00077 | 0.00084 | 0.0011  | 0.00142 |
| 7.3E-06 | 0.00176 | 0.0008  | 0.00119 | 0.00047 | 0.00135 |
| 7.3E-06 | 0.00131 | 0.00142 | 0.0002  | 0.00022 | 0.0004  |
| 7.3E-06 | 0.00116 | 0.0008  | 0.00096 | 0.00067 | 0.00077 |
| 7.4E-06 | 0.00236 | 0.00113 | -0.0006 | 0.00073 | 0.00158 |
| 7.4E-06 | 0.00143 | 0.00155 | 0.00149 | 0.00037 | 0.00119 |
| 7.4E-06 | 0.00209 | 0.00044 | 0.00055 | 0.00054 | 0.00066 |
| 7.5E-06 | 0.00224 | 0.00112 | 0.00105 | 0.00063 | 0.00129 |

|         |         |         |         |         |         |
|---------|---------|---------|---------|---------|---------|
| 7.5E-06 | 0.00229 | 0.00143 | 0.00138 | 0.00135 | 0.00088 |
| 7.5E-06 | 0.00099 | 0.00116 | 0.00123 | 0.002   | 0.00129 |
| 7.6E-06 | 0.00215 | 0.00139 | 0.00145 | 0.00066 | 0.00113 |
| 7.6E-06 | 0.00183 | 0.00079 | 1.6E-05 | -5E-05  | 0.0009  |
| 7.6E-06 | 0.00171 | 0.00136 | 0.00059 | 0.00064 | 0.00162 |
| 7.6E-06 | 0.00252 | 0.0009  | 0.00109 | 0.0005  | 0.00087 |
| 7.7E-06 | 0.00187 | 0.00092 | 0.00091 | 9.8E-05 | 0.00076 |
| 7.7E-06 | 0.00188 | 0.00045 | 0.00127 | 0.00067 | 0.001   |
| 7.7E-06 | 0.00195 | 0.00085 | 5.9E-05 | 0.00036 | 0.00092 |
| 7.8E-06 | 0.00154 | 0.00149 | 0.00142 | 0.00015 | 0.00111 |
| 7.8E-06 | 0.00103 | 0.00071 | 0.00146 | 0.00229 | 0.00141 |
| 7.8E-06 | 0.0021  | 0.0015  | 0.00052 | 3.3E-05 | 0.00112 |
| 7.9E-06 | 0.0024  | 0.00185 | 0.00104 | 0.00117 | 0.00082 |
| 7.9E-06 | 0.00148 | 0.0007  | 0.00039 | 0.00083 | 0.0015  |
| 7.9E-06 | 0.00183 | 0.00139 | 0.00088 | 0.00102 | 0.00055 |
| 8E-06   | 0.00228 | 0.00129 | 0.00033 | 0.00049 | 0.00099 |
| 8E-06   | 0.00198 | 0.00011 | 0.00015 | 0.00054 | 0.00133 |
| 8E-06   | 0.00146 | 0.00033 | 0.00062 | 0.00057 | 0.00058 |
| 8.1E-06 | 0.00194 | 0.00102 | 0.00126 | 0.0007  | 0.00086 |
| 8.1E-06 | 0.002   | 0.0013  | 0.00125 | 0.00032 | 0.00152 |
| 8.1E-06 | 0.00206 | 0.00157 | 0.00096 | 0.00099 | 0.00025 |
| 8.2E-06 | 0.0013  | 0.00058 | 0.0016  | 1.2E-05 | 0.00095 |
| 8.2E-06 | 0.00166 | 0.00091 | 0.00014 | 0.00152 | 0.00124 |
| 8.2E-06 | 0.00203 | 0.00082 | 0.00103 | 0.00084 | 0.00128 |
| 8.3E-06 | 0.00167 | 0.00108 | 0.00135 | 0.00085 | 0.00112 |
| 8.3E-06 | 0.00109 | 7E-05   | 0.0011  | 0.00058 | 0.00046 |
| 8.3E-06 | 0.00092 | 0.00021 | 0.00048 | 0.0007  | 0.00137 |
| 8.4E-06 | 0.0015  | 0.00178 | 0.00053 | 0.00096 | 0.00072 |
| 8.4E-06 | 0.00218 | 0.00131 | 0.00061 | 0.00115 | 0.00106 |
| 8.4E-06 | 0.00145 | 0.00131 | 0.00113 | 0.00089 | 0.00138 |
| 8.4E-06 | 0.00171 | 0.00112 | 0.00103 | 0.00086 | 0.00139 |
| 8.5E-06 | 0.00314 | 0.0011  | 0.0006  | 0.00095 | 0.00115 |
| 8.5E-06 | 0.00227 | 0.0009  | 0.00048 | -5E-05  | 0.001   |
| 8.5E-06 | 0.00269 | 0.00084 | 0.00072 | -9E-05  | 0.00105 |
| 8.6E-06 | 0.00108 | 0.00071 | -0.0007 | 0.00071 | 0.00193 |
| 8.6E-06 | 0.00092 | 0.00086 | 0.00062 | 0.00052 | 0.00106 |
| 8.6E-06 | 0.00176 | 0.00113 | 0.0007  | -0.0007 | 0.00066 |
| 8.7E-06 | 0.00224 | 0.00116 | 0.00058 | 0.00036 | 0.00094 |
| 8.7E-06 | 0.00203 | 0.00087 | 0.00095 | 0.00125 | 0.00093 |
| 8.7E-06 | 0.00125 | 0.00105 | 0.00052 | 7.2E-05 | 0.00059 |
| 8.8E-06 | 0.00188 | 0.00159 | 0.00067 | 0.00047 | 0.00132 |
| 8.8E-06 | 0.0016  | 0.00063 | 0.00016 | 0.00014 | 0.00036 |
| 8.8E-06 | 0.00129 | 0.00126 | 0.00036 | -0.0005 | 0.00141 |
| 8.9E-06 | 0.00106 | 0.00055 | 0.00119 | 0.00091 | 0.00091 |
| 8.9E-06 | 0.00171 | 0.00139 | 7.5E-06 | 0.00116 | 0.00078 |
| 8.9E-06 | 0.00128 | 0.00152 | 0.0012  | 0.00055 | 0.0019  |
| 9E-06   | 0.00219 | 0.00071 | 0.00127 | 0.0006  | 0.0007  |
| 9E-06   | 0.00179 | 0.00121 | 0.00101 | 0.00105 | 0.00097 |
| 9E-06   | 0.00164 | 0.00083 | 0.00157 | -0.0005 | 0.00076 |
| 9.1E-06 | 0.00118 | 0.00069 | -4E-05  | -3E-05  | 0.00088 |
| 9.1E-06 | 0.00182 | 0.00088 | 0.00065 | 0.00017 | 0.00128 |
| 9.1E-06 | 0.00288 | 0.00111 | 0.00011 | 0.00035 | 0.00105 |
| 9.2E-06 | 0.00178 | 0.00041 | 0.00047 | 0.00079 | 0.00162 |
| 9.2E-06 | 0.00077 | 0.00064 | 0.00025 | 0.00044 | 0.00159 |

|         |         |         |         |         |         |
|---------|---------|---------|---------|---------|---------|
| 9.2E-06 | 0.00202 | 0.00163 | 0.00098 | 0.00048 | 0.00164 |
| 9.2E-06 | 0.00216 | 0.00191 | 0.00049 | 0.00016 | 0.00071 |
| 9.3E-06 | 0.00216 | 0.00174 | 0.00092 | 0.00021 | 0.0002  |
| 9.3E-06 | 0.00165 | 0.00154 | 0.00055 | 0.00071 | 0.0009  |
| 9.3E-06 | 0.00099 | 0.00099 | 0.00064 | 0.00023 | 0.00146 |
| 9.4E-06 | 0.00171 | 0.00126 | 3.7E-05 | -6E-05  | 0.00115 |
| 9.4E-06 | 0.0021  | 0.00079 | 0.00102 | 0.00074 | 0.00144 |
| 9.4E-06 | 0.00082 | 0.00058 | 0.00063 | 0.00072 | 0.00174 |
| 9.5E-06 | 0.00131 | 0.00029 | 0.00091 | 0.00075 | 0.0006  |
| 9.5E-06 | 0.00216 | -0.0002 | 0.00024 | 0.00034 | 0.00079 |
| 9.5E-06 | 0.00133 | 8.5E-05 | 0.00071 | 0.00036 | 0.00119 |
| 9.6E-06 | 0.00124 | 0.00062 | 0.00093 | 0.00057 | 0.00063 |
| 9.6E-06 | 0.00205 | 0.00161 | 0.00032 | 0.00049 | 0.00155 |
| 9.6E-06 | 0.00219 | 0.00113 | 0.00085 | 0.00048 | 0.00093 |
| 9.7E-06 | 0.00204 | 0.00062 | 0.00011 | 0.00074 | 0.00136 |
| 9.7E-06 | 0.00233 | 0.00036 | 0.00045 | 0.00072 | 0.00101 |
| 9.7E-06 | 0.00177 | 0.0011  | 0.00024 | 0.00112 | 0.00024 |
| 9.8E-06 | 0.00166 | 0.00079 | 0.0009  | 0.00143 | 0.0017  |
| 9.8E-06 | 0.00187 | 7.7E-05 | 0.00107 | 0.00126 | 0.00096 |
| 9.8E-06 | 0.00162 | 0.00112 | 0.0001  | 0.00141 | 0.00061 |
| 9.9E-06 | 0.00123 | 0.0013  | 0.0007  | 0.00155 | 0.00054 |
| 9.9E-06 | 0.00166 | 0.00078 | 0.00084 | 0.00083 | 0.0011  |
| 9.9E-06 | 0.00231 | 0.00058 | 0.0002  | 0.00077 | 0.00154 |
| 1E-05   | 0.00214 | 0.00066 | 0.00052 | 0.00058 | 0.00136 |
| 1E-05   | 0.00209 | 0.00099 | 0.00086 | 0.00113 | 0.00162 |
| 1E-05   | 0.00245 | 0.00106 | -0.0005 | 0.00082 | 0.00148 |
| 1E-05   | 0.0027  | 0.0012  | 0.00089 | 0.00102 | 0.00163 |
| 1E-05   | 0.00197 | 0.00059 | 0.0007  | 0.00065 | 0.00063 |
| 1E-05   | 0.00169 | 0.00053 | 0.00152 | 0.00161 | 0.00166 |
| 1E-05   | 0.00231 | 0.00061 | 0.00062 | 0.00076 | 0.00078 |
| 1E-05   | 0.00159 | 0.00019 | 0.00158 | 0.00075 | 0.00079 |
| 1E-05   | 0.00142 | 0.0011  | 0.00117 | 0.00122 | 0.00151 |
| 1E-05   | 0.00115 | 0.00091 | 0.00101 | 0.00068 | 0.00122 |
| 1E-05   | 0.00206 | 0.00082 | 0.00072 | 0.00063 | 0.00119 |
| 1E-05   | 0.00223 | 0.00135 | 0.00115 | 0.00076 | 0.00124 |
| 1E-05   | 0.00211 | 0.00101 | 0.00136 | 0.00031 | 0.00134 |
| 1E-05   | 0.00201 | 0.00096 | 0.00089 | 0.00104 | 0.00124 |
| 1E-05   | 0.00172 | 0.00097 | 0.00069 | 0.00085 | 0.00109 |
| 1E-05   | 0.00145 | 0.00032 | 0.00133 | 0.00052 | 0.00127 |
| 1E-05   | 0.00201 | 0.00058 | 0.00075 | 0.00073 | 0.00065 |
| 1.1E-05 | 0.00179 | 0.00063 | 0.00102 | 0.0014  | 0.0008  |
| 1.1E-05 | 0.00147 | 0.00055 | 0.00095 | 0.00096 | 0.00047 |
| 1.1E-05 | 0.00216 | 0.001   | 0.0007  | 0.0009  | 0.00165 |
| 1.1E-05 | 0.002   | 0.0008  | 0.00047 | 0.00026 | 0.00137 |
| 1.1E-05 | 0.00183 | 0.00091 | 0.00011 | 0.00082 | 0.00113 |
| 1.1E-05 | 0.00184 | 0.00067 | 0.00079 | 0.00029 | 0.00064 |
| 1.1E-05 | 0.0025  | -0.0002 | 0.00036 | 0.0003  | 0.00122 |
| 1.1E-05 | 0.0018  | 0.00093 | 0.0008  | 0.00016 | 0.00162 |
| 1.1E-05 | 0.0016  | 8E-05   | 0.00045 | 0.00027 | 0.00171 |
| 1.1E-05 | 0.00165 | 0.00094 | 0.00057 | 0.00131 | 0.0014  |
| 1.1E-05 | 0.00162 | 0.00071 | 0.00083 | 0.00041 | 0.00148 |
| 1.1E-05 | 0.00204 | 0.00045 | 0.00025 | 0.00072 | 0.00091 |
| 1.1E-05 | 0.00086 | 0.00042 | 0.00059 | 0.00044 | 0.00219 |
| 1.1E-05 | 0.00296 | 0.00092 | 0.00068 | 0.00118 | 0.00096 |

|         |         |         |         |         |         |
|---------|---------|---------|---------|---------|---------|
| 1.1E-05 | 0.00167 | 0.00036 | 0.00104 | -1E-04  | 0.00131 |
| 1.1E-05 | 0.00214 | 0.00107 | 0.00104 | -0.0002 | 0.00111 |
| 1.1E-05 | 0.00218 | 0.00155 | 0.00107 | 0.00072 | 0.00083 |
| 1.1E-05 | 0.00111 | 0.00064 | 0.00059 | 0.0003  | 0.00144 |
| 1.1E-05 | 0.00127 | 0.00035 | 0.00106 | 0.00069 | 0.00124 |
| 1.1E-05 | 0.00231 | 0.00144 | 0.00109 | -0.0007 | 0.00172 |
| 1.1E-05 | 0.0019  | 0.00113 | 0.00054 | 0.00037 | 0.00011 |
| 1.1E-05 | 0.00146 | 0.00066 | 0.00085 | 0.0003  | 0.00107 |
| 1.1E-05 | 0.00134 | 0.00049 | 0.00065 | -0.0001 | 0.00065 |
| 1.1E-05 | 0.0017  | 0.00118 | 0.00109 | 0.0006  | 0.00024 |
| 1.1E-05 | 0.00233 | 0.00049 | 0.00072 | 0.00066 | 0.00015 |
| 1.1E-05 | 0.00205 | 0.00057 | -0.0002 | 0.00159 | 0.00125 |
| 1.1E-05 | 0.00223 | 0.00077 | 0.00118 | 0.0008  | 0.00101 |
| 1.1E-05 | 0.0018  | 0.00114 | 0.00093 | -0.0008 | 0.00036 |
| 1.1E-05 | 0.00207 | 0.00063 | 0.00084 | 0.00018 | 0.00044 |
| 1.1E-05 | 0.00164 | 0.00032 | 0.00104 | 0.00012 | 0.00084 |
| 1.1E-05 | 0.00216 | 0.00026 | 0.00071 | 0.00021 | 0.00097 |
| 1.1E-05 | 0.00139 | 0.00086 | 0.00038 | -0.0005 | 0.00122 |
| 1.2E-05 | 0.00222 | 0.00083 | 0.0012  | 3E-05   | 0.00087 |
| 1.2E-05 | 0.00176 | 0.00064 | 0.00022 | 0.00086 | 0.00059 |
| 1.2E-05 | 0.00136 | 0.00065 | 0.00039 | 0.00076 | 0.00085 |
| 1.2E-05 | 0.00169 | 0.00113 | 0.00069 | 0.00014 | 0.00083 |
| 1.2E-05 | 0.00138 | 0.00071 | 0.00023 | -0.0001 | 0.00162 |
| 1.2E-05 | 0.00183 | 0.00098 | 0.00067 | 0.00081 | 0.00106 |
| 1.2E-05 | 0.00228 | 0.00065 | 0.0003  | 0.00078 | 0.00098 |
| 1.2E-05 | 0.00177 | 0.00075 | 0.00022 | -0.0002 | 0.00102 |
| 1.2E-05 | 0.00062 | 0.00022 | 0.00063 | 0.00012 | 0.00104 |
| 1.2E-05 | 0.00199 | 0.00112 | 0.00139 | 0.00019 | 0.0011  |
| 1.2E-05 | 0.00206 | 0.00142 | -0.0002 | 0.00038 | 0.00129 |
| 1.2E-05 | 0.00164 | 0.00039 | 0.00044 | 0.0004  | 0.00132 |
| 1.2E-05 | 0.00201 | 0.00044 | 0.00105 | 0.00056 | 0.00144 |
| 1.2E-05 | 0.00164 | 0.00077 | 0.00046 | 0.00022 | 0.00087 |
| 1.2E-05 | 0.00203 | 0.00118 | 0.0005  | 0.0004  | 0.00208 |
| 1.2E-05 | 0.00134 | 0.00089 | 0.0012  | 0.00031 | 0.00182 |
| 1.2E-05 | 0.00258 | 2.4E-05 | -0.0002 | -0.0004 | 0.00094 |
| 1.2E-05 | 0.00087 | 0.00063 | 0.00041 | 0.00036 | 0.00086 |
| 1.2E-05 | 0.0018  | 0.00122 | -8E-05  | 0.00011 | 0.00195 |
| 1.2E-05 | 0.00186 | 0.00045 | 0.00116 | 0.00088 | 0.0015  |
| 1.2E-05 | 0.00151 | 0.00097 | 0.00057 | 0.00055 | 0.00241 |
| 1.2E-05 | 0.00202 | 0.00089 | 0.00019 | 0.00129 | 0.00055 |
| 1.2E-05 | 0.0009  | 0.00051 | -9E-05  | 0.0002  | 0.00115 |
| 1.2E-05 | 0.00183 | 8.5E-05 | 0.00013 | 0.00056 | 0.00096 |
| 1.2E-05 | 0.00198 | 0.00123 | 0.00061 | 0.0005  | 0.00095 |
| 1.2E-05 | 0.00133 | 0.00062 | 0.0003  | 0.00036 | 0.0015  |
| 1.2E-05 | 0.00143 | 0.00079 | 0.00066 | 0.00104 | 0.00161 |
| 1.2E-05 | 0.00092 | 0.00094 | -0.0003 | 0.00057 | 0.00219 |
| 1.2E-05 | 0.00251 | 0.00121 | 0.00054 | 0.00112 | 0.0018  |
| 1.2E-05 | 0.00174 | 0.00166 | 0.00027 | -0.0005 | 0.00024 |
| 1.2E-05 | 0.00154 | 0.00087 | 0.00044 | 0.00047 | 0.00035 |
| 1.3E-05 | 0.00137 | 0.00075 | 0.00064 | 0.0011  | 0.0015  |
| 1.3E-05 | 0.00146 | 0.00062 | -0.0002 | 0.00032 | 0.00047 |
| 1.3E-05 | 0.00245 | 0.0015  | 0.00013 | -0.0001 | 0.00149 |
| 1.3E-05 | 0.00161 | 0.00033 | 0.00052 | 0.00071 | 0.00087 |
| 1.3E-05 | 0.00196 | 0.00066 | -0.0003 | 0.0001  | 0.00069 |

|         |         |         |         |         |         |
|---------|---------|---------|---------|---------|---------|
| 1.3E-05 | 0.0017  | 0.00087 | -0.0002 | 0.00067 | 0.00146 |
| 1.3E-05 | 0.00194 | 0.00066 | 0.0002  | 0.00043 | 0.00103 |
| 1.3E-05 | 0.00112 | 0.00078 | 0.0004  | 0.00067 | 0.0012  |
| 1.3E-05 | 0.00209 | 0.00022 | 0.00045 | -8E-05  | 0.00126 |
| 1.3E-05 | 0.00117 | 0.00125 | 0.00027 | 0.00088 | -0.0001 |
| 1.3E-05 | 0.00178 | 0.00112 | 0.00014 | 0.0004  | 0.00081 |
| 1.3E-05 | 0.00143 | 0.00026 | -0.0001 | 0.0004  | 0.00129 |
| 1.3E-05 | 0.00169 | 0.00079 | -0.0001 | 0.00085 | 0.00113 |
| 1.3E-05 | 0.00191 | 0.00039 | 0.00083 | 0.00055 | 0.00125 |
| 1.3E-05 | 0.00089 | 2E-05   | -0.0002 | 0.00144 | 0.00171 |
| 1.3E-05 | 0.00171 | -2E-05  | -0.0002 | 0.00121 | 0.0015  |
| 1.3E-05 | 0.00198 | -0.0003 | 0.0006  | 0.00079 | 0.00197 |
| 1.3E-05 | 0.00037 | 0.00067 | 0.00072 | 0.00042 | 0.00173 |
| 1.3E-05 | 0.00206 | 0.00073 | -0.0003 | 0.00044 | 0.00099 |
| 1.3E-05 | 0.00191 | 0.00089 | 0.00015 | 0.00066 | 0.00173 |
| 1.3E-05 | 0.00168 | 0.00152 | 0.00041 | -6E-05  | 0.00082 |
| 1.3E-05 | 0.0014  | 0.00068 | 0.00038 | 0.00013 | 0.00024 |
| 1.3E-05 | 0.00158 | 0.00151 | 0.00089 | 0.00141 | 0.00072 |
| 1.3E-05 | 0.00192 | 0.00094 | 0.00016 | 0.00104 | 0.00139 |
| 1.3E-05 | 0.00164 | 0.00093 | 0.00082 | 0.0008  | 0.00098 |
| 1.3E-05 | 0.00164 | 0.00105 | 0.00045 | 0.00057 | 0.00152 |
| 1.3E-05 | 0.00097 | 0.00056 | 0.00044 | 0.00075 | 0.00101 |
| 1.3E-05 | 0.00136 | 0.00128 | 0.00012 | 0.00064 | 0.00147 |
| 1.3E-05 | 0.00183 | 0.00095 | 0.00027 | 0.00024 | 0.00138 |
| 1.3E-05 | 0.00126 | 0.00111 | -5E-05  | 0.00034 | 0.00102 |
| 1.3E-05 | 0.00111 | 0.00102 | 0.00019 | 0.00066 | 0.00125 |
| 1.4E-05 | 0.00195 | 0.00073 | -4E-05  | 0.00054 | 0.00206 |
| 1.4E-05 | 0.00124 | 0.00079 | -0.0001 | 0.00032 | 0.001   |
| 1.4E-05 | 0.00243 | 0.00089 | 0.00035 | 0.00056 | 0.0016  |
| 1.4E-05 | 0.00183 | 0.00022 | 0.00046 | 0.00159 | 0.00168 |
| 1.4E-05 | 0.0021  | 0.00095 | 0.00072 | 0.00032 | 0.0016  |
| 1.4E-05 | 0.00199 | 0.00076 | 0.00065 | -0.0001 | 0.0007  |
| 1.4E-05 | 0.00164 | 0.00103 | 8.2E-05 | 0.00093 | 0.00105 |
| 1.4E-05 | 0.00177 | 0.00047 | 0.00029 | 0.00022 | 0.00107 |
| 1.4E-05 | 0.00098 | 0.00108 | 7.2E-05 | 0.00079 | 0.00084 |
| 1.4E-05 | 0.00148 | 0.00031 | -4E-05  | 0.00128 | 0.00091 |
| 1.4E-05 | 0.00169 | 0.00069 | 0.00031 | 0.00108 | 0.00053 |
| 1.4E-05 | 0.00116 | 0.00083 | 0.00133 | -0.0001 | 0.00049 |
| 1.4E-05 | 0.00187 | -0.0002 | 0.00063 | -1E-04  | 0.00062 |
| 1.4E-05 | 0.0024  | 0.00118 | -0.0003 | 0.00051 | 0.00128 |
| 1.4E-05 | 0.00139 | 0.00114 | -0.0002 | 0.00078 | 0.00085 |
| 1.4E-05 | 0.0012  | 0.00027 | 0.00013 | 0.0008  | 0.00105 |
| 1.4E-05 | 0.00179 | 0.00061 | 6.4E-06 | 0.0003  | 0.0016  |
| 1.4E-05 | 0.00109 | 0.00104 | 0.00048 | 0.00058 | 0.00056 |
| 1.4E-05 | 0.00206 | 0.00018 | 0.00095 | 0.00018 | 0.00145 |
| 1.4E-05 | 0.00147 | 0.00042 | 0.00034 | 0.0004  | 0.00146 |
| 1.4E-05 | 0.00046 | 0.00084 | 0.00082 | 0.00068 | 0.00119 |
| 1.4E-05 | 0.00139 | 0.00055 | 0.00119 | -0.0002 | 0.00038 |
| 1.4E-05 | 0.00129 | 0.00161 | 0.00012 | 0.0002  | 0.00122 |
| 1.4E-05 | 0.0018  | 0.00098 | 0.00013 | 0.00029 | 0.00065 |
| 1.4E-05 | 0.00068 | 0.0005  | -5E-05  | 0.00045 | 0.00116 |
| 1.4E-05 | 0.00214 | 0.00101 | 0.00074 | 0.00069 | 0.00065 |
| 1.4E-05 | 0.00091 | 0.00138 | 0.00046 | 0.0006  | 0.00135 |
| 1.4E-05 | 0.00129 | 0.00162 | -0.0003 | 0.00052 | 0.00117 |

|         |         |         |         |         |         |
|---------|---------|---------|---------|---------|---------|
| 1.4E-05 | 0.00085 | 6.9E-05 | 0.00047 | 0.00047 | 0.00173 |
| 1.4E-05 | 0.0014  | 0.00114 | 0.00024 | 0.00019 | 0.00059 |
| 1.4E-05 | 0.00176 | -9E-05  | 0.00046 | 0.00123 | 0.00093 |
| 1.5E-05 | 0.00106 | 0.00032 | 0.00029 | 0.00077 | 0.00104 |
| 1.5E-05 | 0.00091 | 0.0006  | 0.00078 | 0.00043 | 0.00109 |
| 1.5E-05 | 0.00167 | 0.00103 | 0.00064 | -0.0004 | 0.00089 |
| 1.5E-05 | 0.00086 | 0.00082 | -0.0002 | -0.0002 | 0.00174 |
| 1.5E-05 | 0.00094 | 0.00033 | 0.00025 | 0.00025 | 0.00119 |
| 1.5E-05 | 0.00175 | 0.00081 | 0.00033 | -2E-05  | 0.00083 |
| 1.5E-05 | 0.00188 | 0.00132 | 0.00112 | 0.00113 | 0.0005  |
| 1.5E-05 | 0.00103 | 0.00082 | 0.00036 | 0.00039 | 0.001   |
| 1.5E-05 | 0.00132 | 0.00116 | 0.00019 | 0.00039 | 0.00037 |
| 1.5E-05 | 0.00152 | 0.00073 | 0.00065 | 0.00057 | 0.00162 |
| 1.5E-05 | 0.00158 | 0.00035 | 0.00043 | 0.00023 | 0.00097 |
| 1.5E-05 | 0.00084 | 0.00058 | 3.1E-05 | 9.1E-05 | 0.00218 |
| 1.5E-05 | 0.00105 | 0.00045 | 0.00074 | 0.0006  | 0.00144 |
| 1.5E-05 | 0.00113 | 0.00033 | 0.00027 | 0.00031 | 0.00144 |
| 1.5E-05 | 0.00104 | -0.0001 | 0.0003  | -0.0002 | 0.00066 |
| 1.5E-05 | 0.0017  | 0.00114 | 0.0008  | -5E-05  | 0.0003  |

**Table SI.3A:** Primary kinetic data for the reaction of 1-methyl-2-pyrrolidone (**S3**) with CumO• generated by 355 nm LFP in MeCN (**Figure SI.3A**).

| t / s   | $\Delta A$ 1-methyl-2-pyrrolidone ( <b>S3</b> ) |               |               |               |               |
|---------|-------------------------------------------------|---------------|---------------|---------------|---------------|
|         | <b>0.077 M</b>                                  | <b>0.154M</b> | <b>0.229M</b> | <b>0.303M</b> | <b>0.400M</b> |
| -1E-06  | 0.00025                                         | 0.00025       | 0.0001        | 4.6E-05       | -0.0006       |
| -1E-06  | 0.00022                                         | 0.00066       | -8E-05        | -0.0004       | -8E-05        |
| -9E-07  | 0.00054                                         | 0.0005        | -1E-04        | 0.00108       | -0.0007       |
| -9E-07  | -0.0001                                         | 0.00016       | 8.3E-05       | -1E-05        | -0.0007       |
| -9E-07  | 0.00025                                         | -0.0003       | 6E-05         | -0.0003       | -0.0007       |
| -8E-07  | 0.00017                                         | 0.00018       | 0.00036       | 0.00052       | -0.0002       |
| -8E-07  | 8.4E-05                                         | 0.00045       | -9E-05        | 0.00035       | -0.0003       |
| -8E-07  | -0.0003                                         | 0.00062       | -2E-05        | 0.00051       | -0.0005       |
| -7E-07  | -9E-05                                          | 0.00076       | -0.0001       | 0.00072       | -0.0005       |
| -7E-07  | 0.00023                                         | 0.00089       | -0.0005       | -0.0003       | -0.0004       |
| -7E-07  | 0.00017                                         | 0.00042       | 0.00022       | -6E-05        | 0.00019       |
| -6E-07  | -0.0002                                         | 0.00031       | -0.0006       | 0.00055       | -0.0003       |
| -6E-07  | 0.00019                                         | 0.00049       | -0.0002       | 0.00075       | 0.00018       |
| -6E-07  | -0.0002                                         | 0.00021       | 0.00016       | 0.00081       | -1E-04        |
| -5E-07  | 0.0002                                          | 0.00042       | -0.0002       | 0.00023       | 0.00034       |
| -5E-07  | 0.0006                                          | 0.00044       | -0.0001       | 0.00042       | -0.001        |
| -5E-07  | -0.0006                                         | 0.00021       | 0.0002        | -0.0009       | -0.0003       |
| -4E-07  | 3.7E-05                                         | 0.00043       | 0.00053       | 0.00044       | -0.0003       |
| -4E-07  | -0.0005                                         | 0.00024       | 0.00013       | 0.00037       | -0.0004       |
| -4E-07  | 0.00038                                         | 0.00034       | -0.0004       | 0.00091       | -0.0005       |
| -4E-07  | 0.00036                                         | 0.00051       | 0.00039       | 0.0001        | -0.0007       |
| -3E-07  | -0.0002                                         | 0.0004        | -0.0002       | 0.00035       | -0.0012       |
| -3E-07  | -0.0002                                         | 0.00047       | -0.0001       | 0.00076       | -0.0002       |
| -3E-07  | 0.00039                                         | 0.00084       | -0.0001       | -0.0001       | -0.0009       |
| -2E-07  | -6E-05                                          | 0.00021       | -0.0004       | 0.00044       | -0.0006       |
| -2E-07  | 0.00017                                         | 0.00038       | 0.00029       | 0.00041       | -0.0006       |
| -2E-07  | 4E-05                                           | -0.0003       | -0.0003       | 0.0006        | -0.0008       |
| -1E-07  | -0.0009                                         | 0.00045       | -0.0004       | 0.00066       | -0.0005       |
| -1E-07  | -0.0006                                         | 0.00018       | -0.0002       | 0.00085       | -0.0003       |
| -6E-08  | 0.00022                                         | 0.00041       | -0.0005       | 0.00074       | -0.0003       |
| -3E-08  | -0.0002                                         | 0.00022       | -0.0011       | 0.00038       | -0.0001       |
| -5E-10  | -0.0031                                         | -0.0022       | -0.0037       | -0.0023       | -0.005        |
| 3.1E-08 | -0.0124                                         | -0.0096       | -0.0148       | -0.0125       | -0.0202       |
| 6.3E-08 | 0.01087                                         | 0.01103       | 0.01045       | 0.01011       | 0.00864       |
| 9.5E-08 | 0.01335                                         | 0.01416       | 0.01271       | 0.01341       | 0.01094       |
| 1.3E-07 | 0.01275                                         | 0.01305       | 0.01299       | 0.01349       | 0.01131       |
| 1.6E-07 | 0.01298                                         | 0.01223       | 0.01188       | 0.0126        | 0.01005       |
| 1.9E-07 | 0.01248                                         | 0.01221       | 0.01212       | 0.01134       | 0.00943       |
| 2.2E-07 | 0.01238                                         | 0.01196       | 0.01118       | 0.01113       | 0.00928       |
| 2.6E-07 | 0.01176                                         | 0.01092       | 0.01065       | 0.00994       | 0.00828       |
| 2.9E-07 | 0.01083                                         | 0.01115       | 0.00963       | 0.00959       | 0.00722       |
| 3.2E-07 | 0.01108                                         | 0.01003       | 0.00951       | 0.00909       | 0.00653       |
| 3.5E-07 | 0.01038                                         | 0.00971       | 0.00836       | 0.00729       | 0.00576       |
| 3.8E-07 | 0.00978                                         | 0.00935       | 0.0082        | 0.00723       | 0.00541       |
| 4.2E-07 | 0.00946                                         | 0.00946       | 0.00882       | 0.007         | 0.00558       |
| 4.5E-07 | 0.00976                                         | 0.00882       | 0.00778       | 0.00705       | 0.00529       |
| 4.8E-07 | 0.00839                                         | 0.00878       | 0.00694       | 0.00682       | 0.00471       |
| 5.1E-07 | 0.00905                                         | 0.00802       | 0.00708       | 0.00632       | 0.00431       |
| 5.4E-07 | 0.00917                                         | 0.00816       | 0.00606       | 0.00575       | 0.0045        |



|         |         |         |         |         |         |
|---------|---------|---------|---------|---------|---------|
| 5.8E-07 | 0.00753 | 0.00776 | 0.00615 | 0.00464 | 0.0035  |
| 6.1E-07 | 0.00771 | 0.00712 | 0.00608 | 0.00496 | 0.00326 |
| 6.4E-07 | 0.00766 | 0.00668 | 0.00496 | 0.00545 | 0.0034  |
| 6.7E-07 | 0.00739 | 0.00634 | 0.00528 | 0.00492 | 0.00316 |
| 7E-07   | 0.0077  | 0.00648 | 0.0046  | 0.00447 | 0.00302 |
| 7.4E-07 | 0.00678 | 0.00619 | 0.00456 | 0.004   | 0.00266 |
| 7.7E-07 | 0.00709 | 0.00543 | 0.00472 | 0.00454 | 0.00224 |
| 8E-07   | 0.00702 | 0.0057  | 0.00453 | 0.00299 | 0.00219 |
| 8.3E-07 | 0.00695 | 0.00554 | 0.00415 | 0.00343 | 0.00179 |
| 8.6E-07 | 0.00645 | 0.00577 | 0.00356 | 0.00242 | 0.0022  |
| 9E-07   | 0.00609 | 0.00429 | 0.00279 | 0.0024  | 0.00193 |
| 9.3E-07 | 0.00513 | 0.00509 | 0.00294 | 0.00281 | 0.00124 |
| 9.6E-07 | 0.00533 | 0.00504 | 0.00354 | 0.00349 | 0.00125 |
| 9.9E-07 | 0.00511 | 0.00481 | 0.00246 | 0.00272 | 0.00123 |
| 1E-06   | 0.00506 | 0.00453 | 0.00277 | 0.00295 | 0.0014  |
| 1.1E-06 | 0.00528 | 0.00367 | 0.0017  | 0.00279 | 0.0018  |
| 1.1E-06 | 0.00562 | 0.00408 | 0.00298 | 0.00264 | 0.00115 |
| 1.1E-06 | 0.0048  | 0.00444 | 0.00283 | 0.00262 | 0.00121 |
| 1.2E-06 | 0.00458 | 0.0043  | 0.002   | 0.00242 | 0.00107 |
| 1.2E-06 | 0.00501 | 0.00369 | 0.00274 | 0.00181 | 0.0012  |
| 1.2E-06 | 0.00478 | 0.00346 | 0.0019  | 0.0018  | 0.00076 |
| 1.2E-06 | 0.00377 | 0.00346 | 0.00138 | 0.00193 | 0.00069 |
| 1.3E-06 | 0.00375 | 0.00356 | 0.00174 | 0.00139 | 0.00059 |
| 1.3E-06 | 0.00385 | 0.00309 | 0.00208 | 0.00163 | 0.00135 |
| 1.3E-06 | 0.00382 | 0.00316 | 0.00081 | 0.00141 | 0.00011 |
| 1.4E-06 | 0.00361 | 0.00353 | 0.00136 | 0.00195 | 0.00023 |
| 1.4E-06 | 0.00355 | 0.00317 | 0.00195 | 0.00144 | 0.001   |
| 1.4E-06 | 0.00331 | 0.00294 | 0.00219 | 0.00159 | 0.00099 |
| 1.5E-06 | 0.00362 | 0.00296 | 0.0009  | 0.00153 | -0.0002 |
| 1.5E-06 | 0.00347 | 0.00255 | 0.00125 | 0.00139 | 0.00071 |
| 1.5E-06 | 0.0031  | 0.00273 | 0.00156 | 0.00202 | 0.0007  |
| 1.6E-06 | 0.00316 | 0.00287 | 0.00163 | 0.00121 | 0.00045 |
| 1.6E-06 | 0.00393 | 0.00304 | 0.00139 | 0.00151 | 0.00011 |
| 1.6E-06 | 0.00335 | 0.00237 | 0.00137 | 0.00175 | 0.0005  |
| 1.7E-06 | 0.00276 | 0.00284 | 0.00131 | 0.00138 | 0.00102 |
| 1.7E-06 | 0.00241 | 0.00248 | 0.00133 | 0.00107 | 0.00062 |
| 1.7E-06 | 0.00191 | 0.00187 | 0.0012  | 0.00114 | 0.00011 |
| 1.8E-06 | 0.00279 | 0.0024  | 0.00145 | 0.00141 | 0.00022 |
| 1.8E-06 | 0.00211 | 0.00228 | 0.00027 | 0.00085 | -0.0002 |
| 1.8E-06 | 0.00267 | 0.00273 | 0.00109 | 0.00068 | 0.00038 |
| 1.9E-06 | 0.00177 | 0.00242 | 0.00061 | 0.0007  | 0.00024 |
| 1.9E-06 | 0.00257 | 0.00164 | 0.00075 | 0.00075 | -0.0008 |
| 1.9E-06 | 0.00199 | 0.00258 | 0.00187 | 0.00176 | -0.0003 |
| 2E-06   | 0.00163 | 0.00205 | 0.00069 | 0.00098 | -0.0004 |
| 2E-06   | 0.00253 | 0.00235 | 0.00095 | 0.00074 | 0.00015 |
| 2E-06   | 0.00288 | 0.00228 | 0.00095 | 0.00113 | -0.0002 |
| 2E-06   | 0.00212 | 0.00224 | 0.00132 | 0.00108 | 0.00057 |
| 2.1E-06 | 0.00135 | 0.00175 | -0.0004 | 0.00131 | 0.00021 |
| 2.1E-06 | 0.00197 | 0.00188 | 0.00082 | 0.00046 | 0.00043 |
| 2.1E-06 | 0.00168 | 0.00153 | 0.00094 | 0.00105 | -0.0005 |
| 2.2E-06 | 0.00102 | 0.00155 | 0.00092 | 0.00082 | 0.00037 |
| 2.2E-06 | 0.00177 | 0.00217 | 0.00068 | 0.00115 | 0.00012 |
| 2.2E-06 | 0.00217 | 0.00182 | 0.00036 | 0.00122 | 0.00021 |
| 2.3E-06 | 0.00159 | 0.00133 | 0.00068 | 0.00089 | -0.0004 |

|         |         |         |         |         |         |
|---------|---------|---------|---------|---------|---------|
| 2.3E-06 | 0.00161 | 0.00168 | 0.00021 | 0.00052 | 0.00034 |
| 2.3E-06 | 0.00126 | 0.00201 | 0.00145 | 0.00058 | 0.00106 |
| 2.4E-06 | 0.00145 | 0.00214 | -1E-04  | 0.00078 | 0.00089 |
| 2.4E-06 | 0.00219 | 0.0017  | 0.00084 | 0.00033 | 0.00042 |
| 2.4E-06 | 0.0014  | 0.00163 | 0.00058 | 0.00055 | 0.00044 |
| 2.5E-06 | 0.00248 | 0.00142 | 9E-05   | 0.00045 | 0.0006  |
| 2.5E-06 | 0.00164 | 0.00117 | 0.00047 | 0.00085 | 0.00038 |
| 2.5E-06 | 0.00146 | 0.00144 | 0.00038 | 0.00027 | 0.00057 |
| 2.6E-06 | 0.00172 | 0.00185 | 0.00127 | -2E-05  | 0.00035 |
| 2.6E-06 | 0.00129 | 0.00167 | 0.00127 | 0.00098 | -0.0003 |
| 2.6E-06 | 0.00118 | 0.00205 | 0.00034 | 0.00111 | -0.0001 |
| 2.7E-06 | 0.00041 | 0.00148 | 0.00021 | 0.00138 | 0.00021 |
| 2.7E-06 | 0.00144 | 0.00186 | 0.00072 | 0.00073 | 0.00053 |
| 2.7E-06 | -0.0003 | 0.0016  | 0.0009  | 0.00034 | 0.00072 |
| 2.8E-06 | 0.00105 | 0.00245 | 0.00105 | -4E-05  | 0.00017 |
| 2.8E-06 | 0.00107 | 0.00152 | 0.00043 | 0.00038 | -0.0003 |
| 2.8E-06 | 0.00118 | 0.00158 | 0.00016 | 0.00059 | -0.0002 |
| 2.8E-06 | 0.00131 | 0.00148 | -0.0005 | 0.00056 | 0.00038 |
| 2.9E-06 | 0.00112 | 0.00123 | 0.00027 | 0.00038 | -0.0002 |
| 2.9E-06 | 0.00077 | 0.00116 | 0.00061 | 0.00113 | 0.00025 |
| 2.9E-06 | 0.00113 | 0.00168 | 8.1E-05 | 0.00101 | 0.00016 |
| 3E-06   | 0.00127 | 0.00223 | 0.00035 | 0.00127 | 4E-05   |
| 3E-06   | 0.00113 | 0.00131 | 0.00078 | 0.00067 | 0.00094 |
| 3E-06   | 0.00092 | 0.00189 | 0.0002  | 0.00034 | 0.00064 |
| 3.1E-06 | 0.00117 | 0.00178 | 0.00106 | -0.0002 | 0.00049 |
| 3.1E-06 | 0.00141 | 0.00182 | -0.0004 | 0.00024 | 0.00061 |
| 3.1E-06 | 0.00174 | 0.00148 | 0.00035 | 0.00133 | 0.00065 |
| 3.2E-06 | 0.00066 | 0.0014  | -0.0004 | 0.00137 | -0.0003 |
| 3.2E-06 | 0.00117 | 0.00086 | 0.00098 | 0.00067 | 0.0006  |
| 3.2E-06 | 0.00083 | 0.00196 | 4.3E-05 | 6.5E-05 | 0.00013 |
| 3.3E-06 | 0.0012  | 0.00195 | 0.00115 | 0.00125 | 0.00076 |
| 3.3E-06 | 0.00042 | 0.00144 | 0.00078 | 0.00089 | 0.00041 |
| 3.3E-06 | 0.00115 | 0.00114 | -0.0008 | 0.00092 | -0.0008 |
| 3.4E-06 | 0.00079 | 0.00193 | -0.0005 | 0.00078 | 0.00012 |
| 3.4E-06 | 0.00096 | 0.00127 | 0.00098 | 0.00113 | -0.0002 |
| 3.4E-06 | 0.00084 | 0.00117 | 0.00035 | 0.00071 | 0.00037 |
| 3.5E-06 | 0.00171 | 0.00144 | 0.00054 | 0.00099 | -0.0002 |
| 3.5E-06 | 0.00061 | 0.00178 | -0.0003 | 0.00112 | 0.00035 |
| 3.5E-06 | -6E-05  | 0.00162 | 0.00034 | 0.00056 | 0.00066 |
| 3.6E-06 | 0.00068 | 0.00129 | 0.00046 | 0.00042 | -0.0005 |
| 3.6E-06 | 0.00095 | 0.00182 | 0.00067 | 0.00058 | 0.00026 |
| 3.6E-06 | 0.00108 | 0.00086 | 9E-06   | 0.00011 | 0.00021 |
| 3.6E-06 | 0.00025 | 0.00109 | -9E-05  | 0.00011 | 0.00021 |
| 3.7E-06 | 4.7E-05 | 0.00156 | 0.00087 | 0.00105 | -0.0001 |
| 3.7E-06 | 0.00012 | 0.00164 | 0.00069 | 0.00081 | -0.0001 |
| 3.7E-06 | 0.00033 | 0.00139 | -0.0005 | 0.00059 | 0.00031 |
| 3.8E-06 | 0.00125 | 0.00142 | 0.00013 | 0.00022 | -0.0009 |
| 3.8E-06 | 0.00046 | 0.00095 | 0.00031 | 0.00016 | 0.00027 |
| 3.8E-06 | 0.0011  | 0.00128 | 0.00069 | 0.00057 | -2E-06  |
| 3.9E-06 | -8E-05  | 0.00171 | 0.00071 | 0.00033 | 0.00064 |
| 3.9E-06 | 0.00084 | 0.00184 | 0.00057 | 0.00067 | -0.0005 |
| 3.9E-06 | 0.00019 | 0.00129 | 0.00064 | 0.00134 | 0.00059 |
| 4E-06   | 0.00133 | 0.0013  | -0.0002 | 0.00111 | 0.00071 |
| 4E-06   | 0.00072 | 0.00104 | 0.00112 | 0.00059 | -0.0003 |

|         |         |         |         |         |         |
|---------|---------|---------|---------|---------|---------|
| 4E-06   | -0.0002 | 0.00086 | -0.0001 | 0.00077 | -0.0002 |
| 4.1E-06 | 8E-05   | 0.00134 | -0.0008 | 5.1E-05 | 0.00057 |
| 4.1E-06 | 0.0017  | 0.00167 | 8.5E-05 | 0.00046 | 4.8E-05 |
| 4.1E-06 | 0.00049 | 0.00094 | -0.0003 | 0.00055 | 0.00021 |
| 4.2E-06 | 0.00024 | 0.00126 | 0.00033 | 0.00022 | 0.00016 |
| 4.2E-06 | 0.00106 | 0.00174 | 0.00068 | -5E-05  | 0.00045 |
| 4.2E-06 | 0.00038 | 0.00197 | 1.8E-05 | 0.00055 | -0.0009 |
| 4.3E-06 | 0.00117 | 0.00232 | 0.00078 | -0.0004 | -9E-05  |
| 4.3E-06 | 0.00068 | 0.00126 | 0.00063 | 0.00041 | 0.00021 |
| 4.3E-06 | -0.0004 | 0.00162 | 0.00029 | 0.00056 | 0.00036 |
| 4.4E-06 | 0.00068 | 0.00165 | 0.00058 | 0.00049 | -7E-06  |
| 4.4E-06 | 0.00057 | 0.00096 | 0.00015 | -2E-05  | 0.0003  |
| 4.4E-06 | 7.1E-05 | 0.00107 | 0.0002  | 0.00012 | 0.00024 |
| 4.4E-06 | 0.00073 | 0.00144 | 0.00061 | 0.00044 | 0.00073 |
| 4.5E-06 | -0.0001 | 0.00111 | -0.0002 | 0.0006  | -1E-05  |
| 4.5E-06 | -0.0001 | 0.00208 | -0.0001 | 0.00078 | -0.0008 |
| 4.5E-06 | 0.00024 | 0.00103 | 0.00087 | 0.00073 | -0.0003 |
| 4.6E-06 | 0.00125 | 0.00079 | 0.00053 | 0.00024 | -0.0006 |
| 4.6E-06 | 0.00075 | 0.00076 | 3.5E-05 | 0.0012  | 0.00014 |
| 4.6E-06 | 0.0004  | 0.00111 | 0.00012 | 0.00071 | -0.0001 |
| 4.7E-06 | 0.00097 | 0.00061 | 0.00054 | 0.00076 | 0.00075 |
| 4.7E-06 | 0.00062 | 0.00098 | 0.00011 | -0.0003 | 0.00019 |
| 4.7E-06 | 0.00054 | 0.00177 | -0.0008 | -0.0002 | 0.00038 |
| 4.8E-06 | 0.00088 | 0.0016  | 0.0007  | 0.00042 | 0.0004  |
| 4.8E-06 | 0.00078 | 0.00169 | 0.00081 | 5.7E-05 | 1.8E-05 |
| 4.8E-06 | -0.0004 | 0.00147 | 0.00026 | 0.00049 | 0.00027 |
| 4.9E-06 | 0.00031 | 0.00074 | 0.00047 | 0.00086 | 2E-05   |
| 4.9E-06 | 0.00119 | 0.00156 | 0.00044 | 0.0008  | 0.00052 |
| 4.9E-06 | 0.00031 | 0.00126 | 0.00048 | 0.00101 | 0.00026 |
| 5E-06   | 0.00016 | 0.00098 | -0.0004 | 0.00043 | 0.00021 |
| 5E-06   | 0.00012 | 0.00113 | -0.0001 | 0.00028 | 0.00053 |
| 5E-06   | 5E-05   | 0.00063 | -0.0005 | 0.00073 | 0.00014 |
| 5.1E-06 | -0.0003 | 0.0017  | 0.00029 | 0.00082 | -0.0002 |
| 5.1E-06 | -9E-06  | 0.00191 | 0.00051 | 0.00064 | 0.0001  |
| 5.1E-06 | 0.00043 | 0.00166 | -0.0002 | 0.00037 | 0.00064 |
| 5.2E-06 | 0.00071 | 0.00169 | 0.00039 | 0.00078 | 0.00028 |
| 5.2E-06 | -0.0001 | 0.00131 | 0.00017 | -0.0003 | 0.00047 |
| 5.2E-06 | 0.00097 | 0.00079 | 0.00045 | 0.00037 | 0.0001  |
| 5.2E-06 | 0.00023 | 0.00135 | 0.00012 | -0.0002 | 0.00056 |
| 5.3E-06 | -0.0003 | 0.00135 | -0.0002 | 0.00086 | -4E-05  |
| 5.3E-06 | 0.00014 | 0.00149 | 0.00076 | 0.00024 | -0.0009 |
| 5.3E-06 | -7E-06  | 0.00142 | 0.0002  | 0.00065 | 0.00055 |
| 5.4E-06 | 0.00034 | 0.00076 | 0.00117 | 0.00038 | 0.00012 |
| 5.4E-06 | 0.00073 | 0.00037 | 0.00021 | 0.00079 | 0.00015 |
| 5.4E-06 | 0.00063 | 0.00111 | 0.00059 | -0.0001 | 0.00062 |
| 5.5E-06 | 0.00075 | 0.00138 | 0.00051 | 0.00066 | 3E-05   |
| 5.5E-06 | 0.00075 | 0.00154 | -0.0002 | 0.00096 | 0.00058 |
| 5.5E-06 | 0.0004  | 0.00116 | 0.00064 | 0.0006  | 0.00016 |
| 5.6E-06 | 0.00065 | 0.00094 | 0.00093 | 0.00112 | -0.0001 |
| 5.6E-06 | 0.00097 | 0.00118 | 0.00027 | 0.00104 | -0.0002 |
| 5.6E-06 | 0.00032 | 0.00104 | 0.00014 | -0.0004 | 0.0008  |
| 5.7E-06 | 0.00047 | 0.00116 | 0.00064 | 7.9E-05 | 0.00071 |
| 5.7E-06 | 0.00095 | 0.00156 | 0.00017 | 0.00102 | 0.00049 |
| 5.7E-06 | 0.00102 | 0.00102 | -5E-05  | 0.00096 | 0.00084 |

|         |         |         |         |         |         |
|---------|---------|---------|---------|---------|---------|
| 5.8E-06 | 0.00032 | 0.00126 | 0.00023 | 0.00061 | 0.00014 |
| 5.8E-06 | 0.00048 | 0.00099 | -7E-05  | 0.00048 | 0.00062 |
| 5.8E-06 | 9.6E-05 | 0.00138 | 0.00068 | 0.00036 | 0.00015 |
| 5.9E-06 | 0.00045 | 0.00128 | 0.00035 | 0.00064 | 0.0003  |
| 5.9E-06 | 0.00068 | 0.00133 | 0.00107 | 0.00092 | -0.0002 |
| 5.9E-06 | 0.00043 | 0.00155 | 0.00085 | -0.0003 | -0.0005 |
| 6E-06   | 0.00067 | 0.00073 | 0.00035 | 0.00026 | 0.00069 |
| 6E-06   | 0.00099 | 0.00102 | 0.00086 | 0.00017 | -0.0002 |
| 6E-06   | 0.00022 | 0.00165 | 0.00123 | 0.0006  | 0.00018 |
| 6E-06   | 0.00047 | 0.00132 | 0.00041 | -7E-07  | 0.00052 |
| 6.1E-06 | -0.0003 | 0.0015  | 0.00023 | 0.00056 | 0.00018 |
| 6.1E-06 | 0.0005  | 0.00163 | 1.1E-05 | 0.00032 | 0.00018 |
| 6.1E-06 | 0.00094 | 0.00093 | 0.00017 | -0.0005 | -0.0003 |
| 6.2E-06 | 0.00036 | 0.00169 | -0.0002 | -1E-05  | -0.0003 |
| 6.2E-06 | 0.00072 | 0.00103 | -0.0001 | 0.00131 | -0.0004 |
| 6.2E-06 | 0.00125 | 0.00149 | 0.00025 | 0.00097 | 0.00045 |
| 6.3E-06 | 0.00037 | 0.00103 | 0.00054 | 0.00046 | 0.00014 |
| 6.3E-06 | 0.00053 | 0.00076 | 0.00065 | 0.00091 | -4E-05  |
| 6.3E-06 | -0.0001 | 0.00113 | 0.00046 | 0.00077 | -3E-05  |
| 6.4E-06 | 0.00025 | 0.00131 | 0.00069 | 0.00028 | -6E-06  |
| 6.4E-06 | 2.3E-05 | 0.00138 | -0.0004 | 0.00012 | 0.00038 |
| 6.4E-06 | 0.00029 | 0.00143 | -0.0003 | 0.00054 | -0.0003 |
| 6.5E-06 | 0.00083 | 0.00055 | -0.0001 | 0.00082 | 0.00029 |
| 6.5E-06 | 0.00064 | 0.00138 | -0.0003 | 0.0004  | 0.0001  |
| 6.5E-06 | 6.5E-05 | 0.00195 | -0.0001 | 0.00024 | 0.00023 |
| 6.6E-06 | 0.00108 | 0.00131 | 2.3E-05 | -0.0006 | -0.0002 |
| 6.6E-06 | 0.00121 | 0.00121 | 0.00053 | 0.00045 | 0.00052 |
| 6.6E-06 | 0.00093 | 0.00101 | 0.00034 | 0.00018 | 0.00058 |
| 6.7E-06 | 0.00063 | 0.00125 | -0.0002 | 0.00041 | 0.00066 |
| 6.7E-06 | 0.00076 | 0.00144 | -0.0002 | 0.00047 | -0.0005 |
| 6.7E-06 | 0.00057 | 0.00063 | 0.00038 | -0.0003 | -0.0003 |
| 6.8E-06 | 0.0002  | 0.0009  | 0.00071 | 0.00072 | 0.00051 |
| 6.8E-06 | 0.00062 | 0.00103 | -0.0004 | 0.00046 | 0.00059 |
| 6.8E-06 | 0.0004  | 0.00091 | -0.0005 | 0.00088 | -1E-04  |
| 6.8E-06 | 0.00059 | 0.00153 | 0.00068 | 0.00012 | 1.1E-05 |
| 6.9E-06 | 0.00039 | 0.00156 | 0.00056 | 0.00042 | 0.00034 |
| 6.9E-06 | -0.0008 | 0.0016  | -0.0002 | 0.00075 | 7.4E-05 |
| 6.9E-06 | 0.00013 | 0.00114 | 0.0007  | 0.00026 | 0.00036 |
| 7E-06   | -0.0003 | 0.00066 | 0.00036 | 0.00142 | 0.00049 |
| 7E-06   | 0.00063 | 0.00115 | -1E-05  | 0.00073 | 0.00077 |
| 7E-06   | -0.0006 | 0.00084 | -0.001  | 0.00057 | -0.0002 |
| 7.1E-06 | 0.00012 | 0.00054 | 5.6E-05 | 0.00105 | -3E-06  |
| 7.1E-06 | 0.00031 | 0.00075 | -0.0003 | 0.00149 | 0.0002  |
| 7.1E-06 | 0.00072 | 0.00094 | 7.1E-05 | 0.00024 | 0.00083 |
| 7.2E-06 | 0.00032 | 0.00087 | 0.00019 | 0.00065 | -5E-05  |
| 7.2E-06 | -0.0004 | 0.00131 | 0.00017 | 0.00078 | 0.00022 |
| 7.2E-06 | 6E-05   | 0.00155 | 0.00032 | 0.00049 | 4.6E-05 |
| 7.3E-06 | 0.00026 | 0.00091 | 0.00109 | 0.00063 | 0.00016 |
| 7.3E-06 | 0.00108 | 0.00045 | -0.0003 | 0.00019 | 0.00018 |
| 7.3E-06 | 2.3E-05 | 0.00094 | 0.0002  | 0.00058 | 0.00077 |
| 7.4E-06 | -5E-05  | 0.00106 | 0.00012 | 0.00118 | 0.00038 |
| 7.4E-06 | 0.00027 | 0.00119 | 6.9E-05 | -5E-05  | 0.00092 |
| 7.4E-06 | 0.0006  | 0.00135 | -0.0008 | 0.00071 | 0.00053 |
| 7.5E-06 | 0.00068 | 0.00156 | 5.7E-05 | 0.00012 | -6E-05  |

|         |         |         |         |         |         |
|---------|---------|---------|---------|---------|---------|
| 7.5E-06 | 8.6E-05 | 0.00169 | -0.0004 | 0.00046 | 0.00043 |
| 7.5E-06 | -0.0002 | 0.00175 | -0.0004 | 0.00126 | 0.00034 |
| 7.6E-06 | 3.9E-05 | 0.00065 | -0.0003 | 0.00055 | 0.00042 |
| 7.6E-06 | 0.00059 | 0.0015  | -0.0002 | -3E-05  | 0.00021 |
| 7.6E-06 | 0.00039 | 0.00164 | 0.00059 | 0.00089 | 0.00064 |
| 7.6E-06 | 1.1E-05 | 0.00131 | 0.00072 | 0.00053 | 0.00081 |
| 7.7E-06 | -0.0002 | 0.00091 | -0.0007 | 0.00055 | 0.0007  |
| 7.7E-06 | 0.0005  | 0.00085 | 4.9E-05 | 2.8E-05 | -0.0001 |
| 7.7E-06 | 0.00036 | 0.0014  | 0.00044 | -0.0001 | -0.0001 |
| 7.8E-06 | 0.00023 | 0.00104 | 0.00057 | 0.00098 | 0.00069 |
| 7.8E-06 | 0.00067 | 0.00135 | 0.00077 | 0.00062 | 0.0002  |
| 7.8E-06 | -0.0002 | 0.001   | -0.0002 | 0.00056 | 0.00039 |
| 7.9E-06 | 0.00012 | 0.00095 | 0.00058 | 0.00036 | 0.00061 |
| 7.9E-06 | -0.0001 | 0.00067 | -6E-05  | 0.00099 | 0.00043 |
| 7.9E-06 | 0.00071 | 0.00163 | -0.0001 | 0.00082 | 0.00029 |
| 8E-06   | -0.0005 | 0.00082 | 0.00047 | 0.00053 | 1.6E-05 |
| 8E-06   | 0.00018 | 0.00104 | 0.00046 | -0.0003 | 4.2E-05 |
| 8E-06   | 0.00015 | 0.00119 | -0.0003 | 0.00075 | 9.5E-05 |
| 8.1E-06 | 8.9E-05 | 0.00131 | 5E-05   | -0.0003 | 0.00022 |
| 8.1E-06 | 0.00084 | 0.00135 | -0.0006 | 0.00054 | -3E-05  |
| 8.1E-06 | 0.00047 | 0.00057 | 0.00026 | 0.0003  | 0.00047 |
| 8.2E-06 | -2E-05  | 0.00161 | -0.0004 | -0.0002 | 0.00088 |
| 8.2E-06 | 0.00088 | 0.00098 | -0.0006 | 0.0004  | 0.00051 |
| 8.2E-06 | -0.0006 | 0.00096 | -0.0004 | 0.00074 | 0.0005  |
| 8.3E-06 | 0.00011 | 0.00167 | 0.00047 | -0.0004 | 2.5E-05 |
| 8.3E-06 | 0.00078 | 0.00104 | 0.00075 | 0.00045 | 0.00056 |
| 8.3E-06 | 0.00063 | 0.00106 | -0.0005 | 3.7E-05 | -5E-06  |
| 8.4E-06 | -0.0003 | 0.00106 | 0.00084 | 0.00074 | 0.0004  |
| 8.4E-06 | 5.6E-05 | 0.00113 | 0.00032 | 0.00037 | -2E-05  |
| 8.4E-06 | 0.00038 | 0.00057 | -0.0003 | 0.00059 | 0.00033 |
| 8.4E-06 | 4.3E-05 | 0.00072 | -0.0001 | -0.0001 | 0.00012 |
| 8.5E-06 | 0.00087 | 0.00089 | -0.0001 | 0.00015 | -0.0001 |
| 8.5E-06 | 0.0004  | 0.00114 | -0.0005 | 0.0004  | -0.0001 |
| 8.5E-06 | 0.00043 | 0.00109 | -0.0001 | -0.0002 | -6E-05  |
| 8.6E-06 | 0.00028 | 0.00104 | -4E-05  | 0.00051 | 2.5E-05 |
| 8.6E-06 | 0.00022 | 0.00103 | -2E-05  | 0.00036 | 0.00029 |
| 8.6E-06 | 0.00013 | 0.00103 | 0.00048 | 0.00058 | 0.00061 |
| 8.7E-06 | 0.00078 | 0.00095 | -0.0003 | 0.0013  | 0.00033 |
| 8.7E-06 | -0.0006 | 0.00095 | -0.0005 | 0.00122 | 0.00035 |
| 8.7E-06 | 0.00042 | 0.00107 | 0.00015 | 0.00062 | 1.4E-05 |
| 8.8E-06 | 0.00038 | 0.00051 | -6E-05  | 0.0004  | 0.00023 |
| 8.8E-06 | 0.00072 | 0.0008  | -0.0002 | 0.00043 | 0.0004  |
| 8.8E-06 | 4.9E-05 | 0.00054 | -0.0004 | 0.00052 | -0.0002 |
| 8.9E-06 | 6.6E-05 | 0.0009  | -0.0009 | 0.0008  | 8.7E-05 |
| 8.9E-06 | 0.00012 | 0.00114 | 0.00049 | 0.00047 | 0.00028 |
| 8.9E-06 | 0.00089 | 0.00071 | 0.00042 | 0.00097 | 2.7E-05 |
| 9E-06   | 0.00018 | 0.00032 | 0.00019 | 0.00052 | 0.00024 |
| 9E-06   | 9.6E-05 | 0.00071 | -0.0004 | 0.00076 | 0.00049 |
| 9E-06   | 0.00104 | 0.00055 | -0.0003 | 0.00027 | -0.0001 |
| 9.1E-06 | 0.00087 | 0.00073 | 5.6E-05 | 0.00017 | 0.00038 |
| 9.1E-06 | -1E-05  | 0.00091 | -0.0008 | 0.00022 | 2.9E-05 |
| 9.1E-06 | 0.00031 | 0.00063 | -0.0002 | 0.0002  | 0.00042 |
| 9.2E-06 | 0.00057 | 0.00097 | -2E-05  | 0.00078 | 0.00012 |
| 9.2E-06 | -0.0002 | 0.00097 | 2E-05   | -0.0003 | 0.00068 |

|         |         |         |         |         |         |
|---------|---------|---------|---------|---------|---------|
| 9.2E-06 | 0.00052 | 0.00032 | -0.0002 | 0.00101 | 0.00028 |
| 9.2E-06 | 0.0004  | 0.00096 | 0.00019 | 4.1E-05 | -9E-05  |
| 9.3E-06 | 1.7E-06 | 0.00075 | 2.8E-05 | 0.00106 | 0.0003  |
| 9.3E-06 | -0.0004 | 0.00082 | -5E-05  | 0.00055 | 0.0003  |
| 9.3E-06 | 0.00018 | 0.00094 | -5E-05  | 0.00015 | 0.00018 |
| 9.4E-06 | 7.1E-06 | 0.00067 | 0.00032 | -0.0002 | 0.00074 |
| 9.4E-06 | -3E-05  | 0.00053 | 0.0001  | 0.001   | 0.00088 |
| 9.4E-06 | 0.00018 | 0.00065 | 0.00048 | 0.00024 | 0.00026 |
| 9.5E-06 | -0.0003 | 0.00066 | -0.0001 | 0.00086 | 0.00028 |
| 9.5E-06 | 0.00055 | 0.00084 | -0.0013 | 0.00043 | 0.00021 |
| 9.5E-06 | 0.00055 | 0.0012  | -0.0002 | -4E-05  | 0.00091 |
| 9.6E-06 | 0.00079 | 0.00051 | -0.0007 | 0.00042 | 0.00103 |
| 9.6E-06 | -9E-05  | 0.00087 | -0.0002 | 0.00083 | 0.00058 |
| 9.6E-06 | 0.00071 | 0.00163 | 0.00012 | 0.00018 | 0.00026 |
| 9.7E-06 | -0.0003 | 0.00104 | -8E-06  | 0.00023 | 0.00049 |
| 9.7E-06 | -0.0002 | 0.00083 | 0.00081 | 0.00089 | 1.8E-05 |
| 9.7E-06 | 0.00048 | 0.00123 | -0.0006 | 0.00068 | -0.0003 |
| 9.8E-06 | 0.0009  | 0.00094 | -0.0006 | 0.00097 | -0.0003 |
| 9.8E-06 | 0.00033 | 0.00073 | -0.0004 | 0.00095 | 0.00032 |
| 9.8E-06 | 0.00036 | 0.00085 | 0.00012 | 0.0006  | 0.00047 |
| 9.9E-06 | 0.00056 | 0.00057 | 0.00039 | 0.0007  | 0.0005  |
| 9.9E-06 | -2E-05  | 0.00085 | -0.0001 | -1E-05  | 7.7E-05 |
| 9.9E-06 | 0.00017 | 0.00083 | 0.0003  | 0.00021 | 0.00048 |
| 1E-05   | 0.00095 | 0.00093 | -1E-04  | 0.0008  | -5E-05  |
| 1E-05   | 0.0006  | 0.00103 | 0.00025 | -8E-05  | 0.00018 |
| 1E-05   | 0.00044 | 0.00018 | 8.6E-05 | 0.00072 | 0.00047 |
| 1E-05   | -0.0001 | 0.00062 | 0.00035 | 0.00054 | 0.00053 |
| 1E-05   | 0.00013 | 0.00097 | 0.00076 | 0.0007  | 0.00037 |
| 1E-05   | 0.00034 | 0.00095 | 0.00012 | 0.00117 | 0.00015 |
| 1E-05   | -0.0001 | 0.00086 | 0.00023 | 0.00081 | -7E-05  |
| 1E-05   | -0.0002 | -9E-05  | -0.0002 | 0.00033 | -0.0001 |
| 1E-05   | 0.0002  | 0.00104 | 0.0005  | 0.00108 | 0.00069 |
| 1E-05   | -4E-05  | 0.00103 | -0.0002 | 0.00107 | 0.00021 |
| 1E-05   | 0.00031 | 0.00064 | -0.0004 | 0.00038 | 0.00029 |
| 1E-05   | -0.0001 | 0.00067 | 0.00012 | 0.00012 | 3E-05   |
| 1E-05   | 0.00021 | 0.00055 | -4E-05  | 0.00062 | 0.00072 |
| 1E-05   | -0.0004 | 0.00083 | -6E-05  | 0.00058 | 0.00035 |
| 1E-05   | 0.00079 | 0.0009  | -0.0003 | 2E-05   | 0.00021 |
| 1E-05   | 0.00067 | 0.00089 | 0.00016 | 0.00065 | 0.00025 |
| 1E-05   | 0.00036 | 0.0009  | 1.3E-05 | 0.00086 | 0.00018 |
| 1.1E-05 | 0.00054 | 0.00073 | 6.4E-05 | -0.0002 | 0.00036 |
| 1.1E-05 | 0.00023 | 0.00091 | 0.00019 | 0.00018 | 0.00025 |
| 1.1E-05 | -0.0005 | 0.00071 | 0.0001  | 0.0004  | -0.0003 |
| 1.1E-05 | 0.00025 | 0.00086 | -0.0002 | 0.00099 | 9.9E-05 |
| 1.1E-05 | 0.00012 | 0.00049 | -0.0002 | 0.00045 | 0.00011 |
| 1.1E-05 | 4.3E-05 | 0.00042 | 0.00043 | -0.0003 | 0.00044 |
| 1.1E-05 | -0.0001 | 0.00074 | -4E-05  | 6.7E-05 | 0.00023 |
| 1.1E-05 | 7.7E-05 | 0.0005  | 0.00024 | 0.0006  | 0.00047 |
| 1.1E-05 | -0.0001 | 0.00073 | -0.0001 | 0.00059 | -0.0003 |
| 1.1E-05 | -0.0001 | 0.00069 | 9.5E-05 | 0.00012 | -1E-05  |
| 1.1E-05 | -4E-05  | 0.00053 | -0.0002 | 0.00103 | -0.0005 |
| 1.1E-05 | 7.8E-05 | 0.00075 | 2.9E-05 | 0.00049 | 0.00014 |
| 1.1E-05 | 0.00038 | 0.00072 | -7E-05  | -0.0003 | 0.00022 |
| 1.1E-05 | 0.00016 | 0.00027 | -0.0004 | 0.00095 | -0.0003 |

|         |         |         |         |         |         |
|---------|---------|---------|---------|---------|---------|
| 1.1E-05 | 0.00017 | 0.00085 | -4E-05  | 0.00038 | 0.0002  |
| 1.1E-05 | -0.0003 | 0.0005  | 0.00028 | 0.00023 | 0.00025 |
| 1.1E-05 | 0.00061 | 0.00061 | 0.00072 | 0.00023 | -0.0003 |
| 1.1E-05 | 0.00041 | 0.00068 | 0.00014 | 0.00029 | 0.00035 |
| 1.1E-05 | 0.00054 | 0.00083 | -0.0003 | 0.0005  | 9.6E-05 |
| 1.1E-05 | 0.00039 | 0.00053 | -0.0004 | 0.00026 | 0.00022 |
| 1.1E-05 | -0.0002 | 0.00082 | 0.00019 | 0.00038 | 0.00108 |
| 1.1E-05 | 3.4E-05 | 0.00047 | 0.00017 | 0.00029 | 0.00013 |
| 1.1E-05 | 7.4E-06 | 0.00022 | 0.00042 | 0.00057 | -0.0002 |
| 1.1E-05 | 0.00046 | 0.00077 | -0.0007 | 0.00041 | 0.00048 |
| 1.1E-05 | 0.0003  | 0.00066 | -0.0005 | 0.0004  | -9E-05  |
| 1.1E-05 | 0.0002  | 0.00073 | -7E-05  | 0.00076 | 0.00035 |
| 1.1E-05 | -0.0005 | 0.00026 | -8E-05  | 0.00022 | -6E-05  |
| 1.1E-05 | 0.00069 | 0.00054 | 0.00011 | 0.00038 | -0.0003 |
| 1.1E-05 | 0.00031 | 8.2E-05 | -9E-05  | 7.7E-05 | -8E-05  |
| 1.1E-05 | -0.0002 | 0.00022 | 2.6E-05 | 0.00072 | 0.00044 |
| 1.1E-05 | 3.8E-05 | 0.00054 | 9.7E-05 | -0.0006 | -0.0003 |
| 1.1E-05 | 5.8E-05 | 0.00066 | 0.00061 | -0.0001 | 0.00022 |
| 1.2E-05 | 0.00054 | 0.00079 | -0.0001 | 0.00016 | 0.00045 |
| 1.2E-05 | 0.00073 | 0.0007  | 0.00033 | 0.00043 | -0.0002 |
| 1.2E-05 | 1.9E-05 | 0.00052 | -0.0006 | -7E-05  | -3E-05  |
| 1.2E-05 | 0.00053 | 0.00056 | 3.2E-05 | 0.00064 | 0.00028 |
| 1.2E-05 | 0.00018 | 0.00018 | 0.00015 | -0.0002 | 0.00029 |
| 1.2E-05 | 0.0002  | 0.00026 | 0.0002  | 0.00044 | 0.00076 |
| 1.2E-05 | 0.00021 | 0.00041 | 0.00026 | 0.00041 | 0.00063 |
| 1.2E-05 | 0.00056 | 0.00074 | 0.00031 | 0.0003  | -0.0001 |
| 1.2E-05 | 0.00038 | 0.00023 | -0.0002 | 0.00122 | 0.00074 |
| 1.2E-05 | 0.00097 | 0.00068 | 0.00066 | 0.00086 | 9.9E-05 |
| 1.2E-05 | -3E-05  | 0.0006  | 0.00011 | 0.00097 | -0.0004 |
| 1.2E-05 | -5E-05  | 0.00068 | 0.00047 | -8E-05  | 0.00088 |
| 1.2E-05 | 9.9E-05 | 0.00052 | -4E-05  | 8E-05   | 0.00034 |
| 1.2E-05 | 0.00043 | 0.00062 | -7E-06  | 0.00099 | -0.0002 |
| 1.2E-05 | 0.00017 | 0.00043 | -0.0002 | 0.001   | 0.00011 |
| 1.2E-05 | 0.00065 | 0.00034 | 8.1E-05 | -4E-05  | 0.00046 |
| 1.2E-05 | 0.00045 | 9.7E-05 | -0.0001 | 0.00035 | 0.00025 |
| 1.2E-05 | 0.00053 | 0.00077 | -0.0004 | 3.7E-05 | 0.00055 |
| 1.2E-05 | 0.00044 | 0.00021 | -0.0004 | 0.00021 | 0.00115 |
| 1.2E-05 | 0.00022 | 0.00058 | -0.0003 | 1.2E-05 | 0.00013 |
| 1.2E-05 | 5E-05   | 6.5E-05 | -0.0005 | 0.00057 | 0.00023 |
| 1.2E-05 | 0.0006  | 0.00039 | 0.00017 | 0.00117 | 0.00034 |
| 1.2E-05 | 0.00037 | 0.00029 | -0.0006 | 0.00086 | -9E-05  |
| 1.2E-05 | -0.0002 | -0.0003 | 0.0003  | 0.00027 | 0.00028 |
| 1.2E-05 | 2.9E-05 | 0.00048 | 0.00022 | 0.00067 | -0.0002 |
| 1.2E-05 | 0.00056 | 0.00027 | -0.0005 | -0.0001 | 0.00011 |
| 1.2E-05 | 0.00048 | 0.00027 | 3.5E-06 | 0.00032 | 0.00072 |
| 1.2E-05 | -0.0003 | 0.00059 | 0.00079 | 0.00068 | -0.0001 |
| 1.2E-05 | 0.00012 | 6.2E-05 | -0.0004 | -7E-05  | -1E-05  |
| 1.2E-05 | -0.0002 | 0.00048 | 0.00088 | 0.00092 | 0.00014 |
| 1.2E-05 | 0.00013 | 0.00056 | -1E-04  | 7E-05   | -4E-05  |
| 1.3E-05 | 0.00077 | -0.0003 | -0.0003 | 0.00033 | 0.00017 |
| 1.3E-05 | 0.00035 | 7.9E-05 | -0.0002 | 0.00022 | -0.0004 |
| 1.3E-05 | 0.00051 | 0.0005  | 0.0005  | 8.3E-05 | 1.3E-05 |
| 1.3E-05 | 0.00014 | 0.00064 | 0.00046 | 0.00051 | 0.0005  |
| 1.3E-05 | 0.00024 | -0.0004 | -0.0001 | 0.0005  | -0.0004 |

|         |         |         |         |         |         |
|---------|---------|---------|---------|---------|---------|
| 1.3E-05 | -0.0001 | 0.00018 | -0.0002 | 9.8E-05 | 0.00012 |
| 1.3E-05 | 0.0003  | 0.0007  | -0.0001 | 0.00032 | -0.0008 |
| 1.3E-05 | 0.00035 | 0.00033 | 6E-05   | 0.00056 | 0.00012 |
| 1.3E-05 | -0.0007 | -0.0002 | 0.00037 | -0.0002 | 0.00033 |
| 1.3E-05 | 4.8E-05 | 0.00025 | 0.00053 | 0.00018 | 0.00015 |
| 1.3E-05 | -0.0001 | 0.00044 | -0.0001 | 0.00026 | 0.00023 |
| 1.3E-05 | 0.00024 | 0.0004  | 0.00015 | 0.00092 | 0.0006  |
| 1.3E-05 | 0.0004  | 0.00036 | 0.00029 | 0.00034 | -0.0003 |
| 1.3E-05 | 8.8E-05 | -2E-05  | -0.0005 | 0.00038 | 0.00055 |
| 1.3E-05 | 0.00038 | -6E-05  | -6E-05  | 0.00099 | -6E-05  |
| 1.3E-05 | 0.0005  | -0.0005 | 0.00046 | -0.0002 | 0.00078 |
| 1.3E-05 | -0.0002 | 0.00059 | 0.00017 | 2.7E-05 | -0.0004 |
| 1.3E-05 | -4E-05  | 0.00018 | 7.1E-05 | 0.00072 | 0.00018 |
| 1.3E-05 | -0.0004 | 0.00052 | 5.1E-05 | 0.00135 | 0.00021 |
| 1.3E-05 | -0.0003 | 0.00014 | 0.00022 | 0.00069 | -6E-05  |
| 1.3E-05 | 0.00049 | 1E-05   | -0.0005 | 0.00042 | 8.5E-06 |
| 1.3E-05 | 4.8E-05 | 2.5E-05 | -0.0004 | 0.00026 | -0.0006 |
| 1.3E-05 | -0.0002 | 1.4E-05 | -0.0008 | 0.00128 | -0.0003 |
| 1.3E-05 | 0.00036 | 0.00039 | 5.3E-05 | 0.00047 | 0.00014 |
| 1.3E-05 | 0.00056 | 1E-04   | -0.0003 | 1.4E-05 | 0.00043 |
| 1.3E-05 | 5E-05   | -8E-05  | 1.5E-05 | -1E-06  | 0.00024 |
| 1.3E-05 | 0.00023 | 5.6E-05 | -0.0003 | 0.00092 | -0.0005 |
| 1.3E-05 | 9.1E-05 | 0.00049 | -0.0001 | 0.00018 | 0.00019 |
| 1.3E-05 | 0.00019 | 0.00021 | -4E-05  | 0.00085 | -0.0001 |
| 1.3E-05 | 0.00011 | 0.00046 | -0.0007 | 0.00042 | -0.0002 |
| 1.3E-05 | 0.00046 | 0.00027 | 0.00064 | -0.0001 | -0.0003 |
| 1.4E-05 | 1.3E-05 | 5.8E-05 | 0.00051 | 0.00025 | 0.00044 |
| 1.4E-05 | -0.0001 | 0.00019 | -0.0003 | 0.00093 | -1E-04  |
| 1.4E-05 | 0.00011 | 0.00019 | -2E-05  | 0.0007  | 0.00055 |
| 1.4E-05 | 0.0008  | 0.0004  | 6.2E-05 | 0.00021 | -0.0007 |
| 1.4E-05 | -4E-05  | -0.0002 | -0.0012 | -0.0003 | -4E-05  |
| 1.4E-05 | 0.00038 | 8.9E-05 | 0.00037 | -0.0001 | 3.8E-05 |
| 1.4E-05 | 0.00017 | 0.00039 | -5E-05  | 0.00032 | 9.3E-05 |
| 1.4E-05 | 0.00056 | 0.00068 | 0.00023 | 0.00072 | -0.0004 |
| 1.4E-05 | -0.0004 | 0.00028 | -5E-05  | -0.0003 | -0.0002 |
| 1.4E-05 | 0.00049 | -0.0002 | -0.0002 | 0.00017 | -9E-05  |
| 1.4E-05 | 1.2E-05 | 5E-05   | -0.0007 | -3E-05  | -0.0002 |
| 1.4E-05 | 0.0002  | 3.8E-05 | 7E-06   | 0.00075 | 0.00087 |
| 1.4E-05 | 0.00013 | 0.00039 | -0.0002 | 0.00029 | 4.7E-05 |
| 1.4E-05 | 8.2E-06 | 0.00045 | -0.0002 | -0.0003 | 0.00023 |
| 1.4E-05 | 9E-05   | 0.00034 | 0.00023 | 9.2E-05 | -0.0002 |
| 1.4E-05 | 0.00048 | 0.0002  | -0.0004 | 0.00036 | 5.1E-05 |
| 1.4E-05 | 0.00067 | 3.8E-05 | 0.00065 | 0.00016 | 0.00032 |
| 1.4E-05 | 0.00078 | 0.00019 | -0.0004 | 0.00027 | -0.0002 |
| 1.4E-05 | 0.00033 | 0.0001  | -0.0004 | 1.5E-05 | 0.00043 |
| 1.4E-05 | 0.00033 | 0.00019 | 4.1E-05 | 0.0003  | 0.00015 |
| 1.4E-05 | 0.00048 | -1E-05  | 0.00012 | -9E-05  | -0.0002 |
| 1.4E-05 | 0.00061 | -0.0004 | -0.0003 | 0.00033 | 3.8E-05 |
| 1.4E-05 | 0.00037 | -0.0003 | 9.9E-05 | 0.00029 | -5E-06  |
| 1.4E-05 | 0.00094 | -8E-05  | 0.00051 | -0.0004 | 0.0007  |
| 1.4E-05 | 5E-05   | 0.00015 | -0.0005 | 0.00035 | 0.0005  |
| 1.4E-05 | 0.00019 | 0.00044 | -0.0002 | -0.0001 | 6E-05   |
| 1.4E-05 | 0.00084 | -0.0005 | 0.00063 | -8E-05  | -0.0005 |
| 1.4E-05 | -0.0003 | 0.00043 | -0.0002 | 0.00082 | 0.00082 |



|         |         |         |         |         |         |
|---------|---------|---------|---------|---------|---------|
| 1.4E-05 | 0.00076 | 5.5E-05 | -0.0001 | 0.00059 | 0.00037 |
| 1.4E-05 | 0.00069 | -0.0001 | -0.0004 | 3.4E-05 | -8E-05  |
| 1.4E-05 | 0.00083 | -8E-05  | -7E-05  | 0.00014 | 7.4E-05 |
| 1.5E-05 | -0.0002 | 8.9E-05 | -0.0004 | -0.0003 | -0.0003 |
| 1.5E-05 | 0.00043 | -0.0002 | 6E-05   | -0.0003 | -0.0002 |
| 1.5E-05 | -0.0002 | -0.0002 | -3E-05  | 0.00114 | 7.4E-05 |
| 1.5E-05 | 0.0008  | -0.0006 | 0.0004  | 0.00029 | 0.00019 |
| 1.5E-05 | -0.0002 | 6.3E-06 | -0.0006 | 0.00013 | -4E-06  |
| 1.5E-05 | 8.1E-05 | -0.0002 | 0.00029 | 0.00057 | -0.0001 |
| 1.5E-05 | -0.0004 | 5.7E-05 | 3.7E-05 | -0.0002 | 0.00042 |
| 1.5E-05 | 0.00097 | 0.00013 | -4E-05  | 0.00038 | -0.0005 |
| 1.5E-05 | 0.00065 | -0.0002 | -0.0004 | -0.0003 | -6E-05  |
| 1.5E-05 | 0.00038 | -0.0002 | 0.00055 | 0.00057 | 6.6E-05 |
| 1.5E-05 | 0.00028 | 0.00026 | -0.0003 | 0.00061 | 0.00032 |
| 1.5E-05 | 3E-05   | -0.0003 | -0.0002 | 0.00017 | -0.0001 |
| 1.5E-05 | 0.00022 | 0.00041 | 5.3E-05 | 0.00019 | -0.0005 |
| 1.5E-05 | -0.0006 | -0.0001 | -0.0004 | 0.00042 | -0.0001 |
| 1.5E-05 | 0.00011 | -7E-05  | -0.0004 | -0.0002 | 9.9E-05 |
| 1.5E-05 | 0.00023 | 0.00023 | -0.0007 | 0.00017 | -8E-05  |

**Table SI.3B:** Primary kinetic data for the reaction of 1-methyl-2-pyrrolidone (**S3**) with CumO• generated by 355 nm LFP in DMSO (**Figure SI.3B**).

| t / s     | $\Delta A$ 1-methyl-2-pyrrolidone ( <b>S3</b> ) |           |           |           |           |
|-----------|-------------------------------------------------|-----------|-----------|-----------|-----------|
|           | 0.0517 M                                        | 0.103 M   | 0.154 M   | 0.204 M   | 0.253 M   |
| -9.92E-07 | -1.22E-04                                       | 1.31E-04  | -1.58E-04 | -4.49E-04 | 8.33E-05  |
| -9.60E-07 | -6.90E-04                                       | 1.04E-03  | -9.48E-05 | -4.15E-04 | 1.55E-04  |
| -9.28E-07 | -2.25E-04                                       | 4.70E-04  | -3.56E-05 | -6.90E-04 | 2.45E-04  |
| -8.96E-07 | -7.82E-05                                       | 5.97E-04  | -5.11E-04 | -5.80E-04 | 6.67E-04  |
| -8.64E-07 | 5.52E-05                                        | 6.09E-04  | -4.68E-04 | -2.31E-04 | 4.86E-04  |
| -8.32E-07 | 4.92E-04                                        | 4.47E-04  | 4.15E-04  | -4.99E-04 | 6.40E-04  |
| -8.00E-07 | 5.82E-04                                        | 5.84E-04  | -2.10E-04 | -7.79E-04 | 7.43E-05  |
| -7.68E-07 | -9.57E-05                                       | 1.06E-03  | -5.33E-05 | -1.18E-03 | 2.48E-04  |
| -7.36E-07 | 1.66E-04                                        | 6.24E-04  | -1.13E-05 | -2.37E-04 | -5.37E-04 |
| -7.04E-07 | 1.31E-04                                        | 4.70E-04  | -2.24E-04 | -1.31E-03 | 1.64E-04  |
| -6.72E-07 | 3.14E-04                                        | 8.28E-04  | 7.02E-05  | -1.24E-03 | 6.94E-04  |
| -6.40E-07 | 5.59E-04                                        | 4.92E-04  | -1.36E-04 | -6.99E-04 | 6.22E-04  |
| -6.08E-07 | -2.51E-04                                       | 8.70E-04  | -4.66E-04 | -1.17E-03 | -4.37E-05 |
| -5.76E-07 | 4.94E-04                                        | 7.09E-04  | -3.06E-04 | -8.69E-04 | 1.50E-03  |
| -5.44E-07 | 2.72E-04                                        | 5.47E-04  | -1.91E-04 | -9.04E-04 | 9.51E-04  |
| -5.12E-07 | 1.10E-04                                        | 4.92E-04  | -3.00E-04 | -1.10E-03 | 3.65E-04  |
| -4.80E-07 | -6.05E-04                                       | 2.77E-04  | -2.67E-04 | -4.51E-04 | -6.65E-05 |
| -4.48E-07 | -2.43E-04                                       | 5.20E-04  | -5.30E-04 | -1.61E-03 | 2.53E-04  |
| -4.16E-07 | -5.58E-04                                       | 6.99E-04  | -2.78E-04 | -5.53E-04 | 2.97E-04  |
| -3.84E-07 | 2.06E-04                                        | 5.48E-04  | -3.67E-04 | -6.77E-04 | 7.67E-05  |
| -3.52E-07 | -3.16E-04                                       | 4.27E-04  | -5.82E-05 | -1.19E-03 | 6.91E-04  |
| -3.20E-07 | -1.62E-04                                       | 6.40E-04  | -2.72E-04 | -9.74E-04 | 7.98E-04  |
| -2.88E-07 | -6.91E-05                                       | 1.28E-04  | -1.39E-04 | -1.21E-03 | 7.49E-04  |
| -2.56E-07 | -1.41E-04                                       | 7.24E-04  | -1.22E-04 | -1.22E-03 | -1.37E-05 |
| -2.24E-07 | -2.93E-04                                       | 4.37E-04  | -3.28E-04 | -1.17E-03 | 7.38E-04  |
| -1.92E-07 | -5.02E-05                                       | 4.20E-04  | 7.17E-04  | -9.73E-04 | 6.94E-04  |
| -1.60E-07 | -3.74E-05                                       | 5.79E-04  | -4.18E-04 | -6.92E-04 | 5.98E-04  |
| -1.28E-07 | -2.09E-04                                       | 9.83E-04  | -2.74E-04 | -1.06E-03 | 2.76E-05  |
| -9.62E-08 | -1.37E-04                                       | 5.04E-04  | 9.24E-06  | -5.89E-04 | -1.54E-04 |
| -6.42E-08 | -4.07E-04                                       | 6.17E-04  | -2.12E-04 | -9.65E-04 | 6.49E-04  |
| -3.22E-08 | 1.50E-04                                        | 3.74E-04  | 3.72E-04  | -8.47E-04 | 7.19E-04  |
| -1.78E-10 | -3.22E-03                                       | -2.13E-03 | -2.75E-03 | -3.43E-03 | -2.54E-03 |
| 3.18E-08  | -1.05E-02                                       | -9.85E-03 | -1.16E-02 | -1.08E-02 | -1.37E-02 |
| 6.38E-08  | 1.49E-02                                        | 1.53E-02  | 1.37E-02  | 1.26E-02  | 1.32E-02  |
| 9.58E-08  | 1.54E-02                                        | 1.61E-02  | 1.55E-02  | 1.45E-02  | 1.50E-02  |
| 1.28E-07  | 1.56E-02                                        | 1.52E-02  | 1.47E-02  | 1.41E-02  | 1.35E-02  |
| 1.60E-07  | 1.42E-02                                        | 1.48E-02  | 1.40E-02  | 1.25E-02  | 1.33E-02  |
| 1.92E-07  | 1.39E-02                                        | 1.42E-02  | 1.32E-02  | 1.13E-02  | 1.24E-02  |
| 2.24E-07  | 1.34E-02                                        | 1.37E-02  | 1.33E-02  | 1.12E-02  | 1.17E-02  |
| 2.56E-07  | 1.31E-02                                        | 1.38E-02  | 1.18E-02  | 1.04E-02  | 1.07E-02  |
| 2.88E-07  | 1.26E-02                                        | 1.26E-02  | 1.13E-02  | 9.54E-03  | 9.78E-03  |
| 3.20E-07  | 1.23E-02                                        | 1.26E-02  | 1.12E-02  | 9.37E-03  | 9.87E-03  |
| 3.52E-07  | 1.15E-02                                        | 1.19E-02  | 1.09E-02  | 8.07E-03  | 9.22E-03  |
| 3.84E-07  | 1.17E-02                                        | 1.10E-02  | 9.88E-03  | 7.96E-03  | 8.13E-03  |
| 4.16E-07  | 1.10E-02                                        | 1.06E-02  | 9.48E-03  | 7.13E-03  | 7.59E-03  |
| 4.48E-07  | 1.07E-02                                        | 1.08E-02  | 9.12E-03  | 6.98E-03  | 7.83E-03  |
| 4.80E-07  | 1.05E-02                                        | 1.02E-02  | 8.89E-03  | 6.66E-03  | 7.42E-03  |
| 5.12E-07  | 9.99E-03                                        | 9.22E-03  | 7.99E-03  | 5.69E-03  | 6.62E-03  |
| 5.44E-07  | 9.84E-03                                        | 9.25E-03  | 7.72E-03  | 5.92E-03  | 6.01E-03  |

|          |          |          |          |           |          |
|----------|----------|----------|----------|-----------|----------|
| 5.76E-07 | 8.99E-03 | 9.29E-03 | 7.64E-03 | 5.43E-03  | 5.73E-03 |
| 6.08E-07 | 8.91E-03 | 8.91E-03 | 6.71E-03 | 4.91E-03  | 5.49E-03 |
| 6.40E-07 | 8.48E-03 | 8.46E-03 | 7.01E-03 | 4.40E-03  | 5.27E-03 |
| 6.72E-07 | 8.15E-03 | 7.83E-03 | 6.09E-03 | 4.63E-03  | 4.46E-03 |
| 7.04E-07 | 7.97E-03 | 7.51E-03 | 5.66E-03 | 3.46E-03  | 4.50E-03 |
| 7.36E-07 | 8.17E-03 | 7.07E-03 | 6.13E-03 | 3.28E-03  | 4.42E-03 |
| 7.68E-07 | 7.60E-03 | 6.64E-03 | 5.52E-03 | 3.13E-03  | 4.47E-03 |
| 8.00E-07 | 7.32E-03 | 6.73E-03 | 4.99E-03 | 3.60E-03  | 3.93E-03 |
| 8.32E-07 | 6.75E-03 | 6.23E-03 | 5.00E-03 | 2.92E-03  | 3.92E-03 |
| 8.64E-07 | 7.00E-03 | 5.93E-03 | 4.90E-03 | 3.21E-03  | 3.72E-03 |
| 8.96E-07 | 7.12E-03 | 5.87E-03 | 3.69E-03 | 2.79E-03  | 3.45E-03 |
| 9.28E-07 | 6.46E-03 | 4.93E-03 | 4.16E-03 | 2.44E-03  | 3.08E-03 |
| 9.60E-07 | 5.77E-03 | 5.77E-03 | 4.06E-03 | 2.32E-03  | 3.44E-03 |
| 9.92E-07 | 5.49E-03 | 5.34E-03 | 4.99E-03 | 2.01E-03  | 2.56E-03 |
| 1.02E-06 | 5.68E-03 | 4.87E-03 | 3.56E-03 | 1.28E-03  | 2.21E-03 |
| 1.06E-06 | 5.82E-03 | 4.73E-03 | 3.59E-03 | 1.67E-03  | 2.10E-03 |
| 1.09E-06 | 5.27E-03 | 4.84E-03 | 3.14E-03 | 1.64E-03  | 2.28E-03 |
| 1.12E-06 | 5.24E-03 | 4.96E-03 | 3.01E-03 | 1.63E-03  | 1.95E-03 |
| 1.15E-06 | 5.35E-03 | 4.71E-03 | 3.19E-03 | 1.51E-03  | 2.16E-03 |
| 1.18E-06 | 5.52E-03 | 4.60E-03 | 3.41E-03 | 1.37E-03  | 2.30E-03 |
| 1.22E-06 | 4.63E-03 | 4.70E-03 | 2.92E-03 | 1.16E-03  | 1.83E-03 |
| 1.25E-06 | 4.66E-03 | 4.21E-03 | 3.02E-03 | 1.45E-03  | 2.01E-03 |
| 1.28E-06 | 4.96E-03 | 4.02E-03 | 2.76E-03 | 1.21E-03  | 1.78E-03 |
| 1.31E-06 | 4.56E-03 | 4.28E-03 | 2.88E-03 | 8.27E-04  | 1.79E-03 |
| 1.34E-06 | 4.56E-03 | 3.89E-03 | 2.68E-03 | 1.31E-03  | 1.85E-03 |
| 1.38E-06 | 4.36E-03 | 3.87E-03 | 2.96E-03 | 7.59E-04  | 1.78E-03 |
| 1.41E-06 | 3.89E-03 | 3.47E-03 | 3.36E-03 | 5.79E-04  | 1.38E-03 |
| 1.44E-06 | 3.84E-03 | 3.23E-03 | 2.74E-03 | 1.06E-03  | 1.61E-03 |
| 1.47E-06 | 4.44E-03 | 2.67E-03 | 2.21E-03 | 8.13E-04  | 1.82E-03 |
| 1.50E-06 | 3.73E-03 | 3.20E-03 | 2.63E-03 | 8.66E-04  | 1.78E-03 |
| 1.54E-06 | 3.93E-03 | 2.45E-03 | 2.75E-03 | 5.52E-04  | 1.77E-03 |
| 1.57E-06 | 3.25E-03 | 2.96E-03 | 2.46E-03 | 6.29E-04  | 1.67E-03 |
| 1.60E-06 | 3.52E-03 | 3.19E-03 | 2.44E-03 | 1.06E-03  | 1.61E-03 |
| 1.63E-06 | 3.32E-03 | 2.92E-03 | 2.63E-03 | 1.93E-04  | 1.67E-03 |
| 1.66E-06 | 3.21E-03 | 2.80E-03 | 2.47E-03 | 5.64E-04  | 1.45E-03 |
| 1.70E-06 | 3.17E-03 | 2.72E-03 | 2.06E-03 | 2.36E-04  | 1.82E-03 |
| 1.73E-06 | 3.16E-03 | 2.74E-03 | 2.22E-03 | 2.81E-04  | 1.28E-03 |
| 1.76E-06 | 3.17E-03 | 2.84E-03 | 2.04E-03 | 6.36E-04  | 1.81E-03 |
| 1.79E-06 | 3.22E-03 | 2.75E-03 | 2.38E-03 | -2.16E-04 | 1.57E-03 |
| 1.82E-06 | 3.18E-03 | 2.70E-03 | 2.02E-03 | 6.62E-05  | 1.51E-03 |
| 1.86E-06 | 3.26E-03 | 2.75E-03 | 1.71E-03 | 4.65E-04  | 1.18E-03 |
| 1.89E-06 | 3.20E-03 | 2.45E-03 | 1.54E-03 | -1.91E-05 | 1.25E-03 |
| 1.92E-06 | 3.28E-03 | 2.44E-03 | 1.55E-03 | 5.80E-05  | 1.81E-03 |
| 1.95E-06 | 2.20E-03 | 2.70E-03 | 1.76E-03 | -7.52E-05 | 1.42E-03 |
| 1.98E-06 | 2.69E-03 | 2.27E-03 | 2.05E-03 | -5.09E-05 | 1.24E-03 |
| 2.02E-06 | 2.34E-03 | 2.41E-03 | 2.00E-03 | 4.78E-04  | 1.12E-03 |
| 2.05E-06 | 2.91E-03 | 2.40E-03 | 1.79E-03 | 2.42E-04  | 1.92E-03 |
| 2.08E-06 | 2.14E-03 | 2.14E-03 | 1.32E-03 | 4.26E-04  | 1.53E-03 |
| 2.11E-06 | 2.33E-03 | 2.17E-03 | 1.50E-03 | 2.51E-05  | 1.26E-03 |
| 2.14E-06 | 2.17E-03 | 2.61E-03 | 1.57E-03 | 4.07E-04  | 1.66E-03 |
| 2.18E-06 | 2.01E-03 | 2.21E-03 | 1.36E-03 | -2.26E-04 | 9.29E-04 |
| 2.21E-06 | 2.29E-03 | 1.82E-03 | 1.60E-03 | 1.37E-05  | 1.61E-03 |
| 2.24E-06 | 2.15E-03 | 1.94E-03 | 1.19E-03 | 4.91E-04  | 1.25E-03 |
| 2.27E-06 | 2.22E-03 | 1.77E-03 | 1.46E-03 | -3.59E-04 | 1.62E-03 |

|          |          |          |          |           |          |
|----------|----------|----------|----------|-----------|----------|
| 2.30E-06 | 1.91E-03 | 2.06E-03 | 1.31E-03 | 1.71E-04  | 1.53E-03 |
| 2.34E-06 | 2.08E-03 | 2.26E-03 | 8.72E-04 | 1.03E-04  | 1.81E-03 |
| 2.37E-06 | 1.77E-03 | 1.73E-03 | 1.56E-03 | 5.07E-04  | 1.50E-03 |
| 2.40E-06 | 1.91E-03 | 2.37E-03 | 1.18E-03 | 3.03E-04  | 1.40E-03 |
| 2.43E-06 | 1.56E-03 | 2.00E-03 | 1.64E-03 | 2.81E-04  | 1.20E-03 |
| 2.46E-06 | 1.68E-03 | 1.40E-03 | 1.62E-03 | 3.71E-05  | 7.29E-04 |
| 2.50E-06 | 1.60E-03 | 2.40E-03 | 1.63E-03 | -1.90E-04 | 1.62E-03 |
| 2.53E-06 | 1.56E-03 | 2.45E-03 | 1.32E-03 | -1.75E-04 | 1.23E-03 |
| 2.56E-06 | 1.96E-03 | 1.46E-03 | 6.56E-04 | -3.84E-04 | 1.28E-03 |
| 2.59E-06 | 1.34E-03 | 2.43E-03 | 1.24E-03 | -4.05E-04 | 1.15E-03 |
| 2.62E-06 | 1.38E-03 | 2.17E-03 | 1.24E-03 | 6.35E-04  | 5.15E-04 |
| 2.66E-06 | 1.47E-03 | 2.08E-03 | 1.47E-03 | -6.06E-04 | 1.40E-03 |
| 2.69E-06 | 1.56E-03 | 2.22E-03 | 1.25E-03 | 4.52E-04  | 1.30E-03 |
| 2.72E-06 | 1.56E-03 | 2.49E-03 | 3.79E-04 | 3.59E-04  | 1.43E-03 |
| 2.75E-06 | 1.43E-03 | 1.84E-03 | 1.65E-03 | -2.63E-04 | 1.53E-03 |
| 2.78E-06 | 1.17E-03 | 2.19E-03 | 1.40E-03 | -1.09E-03 | 1.23E-03 |
| 2.82E-06 | 1.18E-03 | 2.14E-03 | 1.04E-03 | -1.81E-04 | 1.05E-03 |
| 2.85E-06 | 1.61E-03 | 2.05E-03 | 7.69E-04 | -1.22E-04 | 1.22E-03 |
| 2.88E-06 | 9.42E-04 | 2.10E-03 | 9.02E-04 | 6.40E-05  | 7.91E-04 |
| 2.91E-06 | 1.41E-03 | 2.15E-03 | 2.65E-04 | -2.60E-04 | 1.30E-03 |
| 2.94E-06 | 1.24E-03 | 1.51E-03 | 7.74E-04 | -1.62E-04 | 1.58E-03 |
| 2.98E-06 | 1.55E-03 | 1.18E-03 | 4.44E-04 | 1.99E-04  | 1.56E-03 |
| 3.01E-06 | 1.27E-03 | 1.28E-03 | 8.31E-04 | -1.31E-04 | 9.58E-04 |
| 3.04E-06 | 1.16E-03 | 1.13E-03 | 6.90E-04 | 2.12E-04  | 1.04E-03 |
| 3.07E-06 | 1.09E-03 | 2.37E-03 | 4.62E-04 | -2.93E-04 | 1.38E-03 |
| 3.10E-06 | 1.14E-03 | 1.20E-03 | 2.46E-04 | -4.52E-04 | 8.93E-04 |
| 3.14E-06 | 1.43E-03 | 1.48E-03 | 7.48E-04 | 9.07E-05  | 1.31E-03 |
| 3.17E-06 | 5.87E-04 | 1.49E-03 | 9.46E-04 | 1.37E-04  | 1.61E-03 |
| 3.20E-06 | 7.54E-04 | 1.68E-03 | 5.31E-04 | 1.69E-04  | 1.04E-03 |
| 3.23E-06 | 1.40E-03 | 1.46E-03 | 1.32E-03 | 3.60E-04  | 6.85E-04 |
| 3.26E-06 | 1.23E-03 | 7.52E-04 | 9.24E-04 | 2.26E-04  | 1.11E-03 |
| 3.30E-06 | 9.63E-04 | 1.14E-03 | 2.80E-04 | -9.64E-06 | 1.12E-03 |
| 3.33E-06 | 1.00E-03 | 5.48E-04 | 4.17E-04 | -7.15E-04 | 7.69E-04 |
| 3.36E-06 | 6.62E-04 | 8.97E-04 | 4.15E-04 | 1.07E-05  | 9.36E-04 |
| 3.39E-06 | 8.67E-04 | 9.11E-04 | 7.04E-04 | 1.85E-04  | 9.32E-04 |
| 3.42E-06 | 4.22E-04 | 1.38E-03 | 3.46E-04 | 2.49E-05  | 8.42E-04 |
| 3.46E-06 | 7.62E-04 | 1.44E-03 | 9.32E-04 | -2.60E-04 | 1.22E-03 |
| 3.49E-06 | 1.22E-03 | 1.95E-03 | 4.36E-04 | -1.32E-04 | 2.47E-04 |
| 3.52E-06 | 9.07E-04 | 2.13E-03 | 2.76E-04 | -2.57E-04 | 1.02E-03 |
| 3.55E-06 | 8.55E-04 | 1.49E-03 | 1.17E-03 | -2.89E-04 | 1.38E-03 |
| 3.58E-06 | 7.21E-04 | 2.29E-03 | 5.67E-04 | 4.83E-05  | 9.69E-04 |
| 3.62E-06 | 6.91E-04 | 1.77E-03 | 5.05E-04 | -2.69E-04 | 9.95E-04 |
| 3.65E-06 | 9.98E-04 | 1.22E-03 | 4.62E-04 | -3.51E-04 | 5.83E-04 |
| 3.68E-06 | 9.49E-04 | 1.62E-03 | 1.14E-03 | -6.84E-04 | 1.05E-03 |
| 3.71E-06 | 6.57E-04 | 1.54E-03 | 1.86E-04 | -1.66E-04 | 8.33E-04 |
| 3.74E-06 | 1.21E-03 | 1.54E-03 | 5.79E-04 | -4.87E-04 | 1.05E-03 |
| 3.78E-06 | 1.11E-03 | 1.89E-03 | 7.87E-04 | -8.31E-05 | 1.14E-03 |
| 3.81E-06 | 6.35E-04 | 1.51E-03 | 5.64E-04 | -4.90E-04 | 1.62E-03 |
| 3.84E-06 | 1.48E-03 | 1.74E-03 | 2.36E-04 | -3.40E-04 | 6.98E-04 |
| 3.87E-06 | 8.85E-04 | 1.18E-03 | 7.43E-04 | -1.57E-04 | 8.29E-04 |
| 3.90E-06 | 8.20E-04 | 1.79E-03 | 2.09E-04 | -3.12E-04 | 6.96E-04 |
| 3.94E-06 | 1.20E-03 | 2.09E-03 | 5.25E-04 | 2.68E-04  | 5.80E-04 |
| 3.97E-06 | 1.35E-03 | 1.62E-03 | 9.20E-04 | 2.04E-04  | 1.28E-03 |
| 4.00E-06 | 8.36E-04 | 8.50E-04 | 8.86E-04 | -1.42E-04 | 7.71E-04 |

|          |           |          |           |           |           |
|----------|-----------|----------|-----------|-----------|-----------|
| 4.03E-06 | 9.03E-04  | 2.15E-03 | 7.80E-04  | -7.77E-05 | 9.23E-04  |
| 4.06E-06 | 8.65E-04  | 1.33E-03 | 1.43E-03  | -3.40E-05 | -2.33E-04 |
| 4.10E-06 | 7.83E-04  | 1.83E-03 | 2.07E-04  | -1.67E-04 | 1.28E-03  |
| 4.13E-06 | 1.30E-03  | 1.52E-03 | 6.80E-04  | -4.42E-04 | 1.13E-03  |
| 4.16E-06 | 7.83E-04  | 1.68E-03 | 1.30E-03  | -4.68E-04 | 8.37E-04  |
| 4.19E-06 | 8.50E-04  | 1.34E-03 | 1.17E-03  | -1.40E-04 | 5.73E-04  |
| 4.22E-06 | 8.82E-04  | 1.77E-03 | 4.04E-04  | -2.96E-04 | 1.28E-03  |
| 4.26E-06 | 9.48E-04  | 2.07E-03 | 8.52E-04  | -7.39E-04 | 1.15E-03  |
| 4.29E-06 | 8.90E-04  | 1.51E-03 | 1.30E-03  | -4.18E-04 | 1.24E-03  |
| 4.32E-06 | 6.14E-04  | 1.15E-03 | 1.11E-03  | 1.73E-04  | 1.06E-03  |
| 4.35E-06 | 9.37E-04  | 1.22E-03 | 9.24E-04  | -6.11E-04 | 1.13E-03  |
| 4.38E-06 | 5.21E-04  | 1.48E-03 | 9.14E-04  | -5.00E-04 | 1.23E-03  |
| 4.42E-06 | 7.73E-04  | 2.02E-03 | 4.94E-04  | 1.78E-04  | 1.03E-03  |
| 4.45E-06 | 1.01E-03  | 1.79E-03 | 1.30E-03  | 8.03E-05  | 8.53E-04  |
| 4.48E-06 | 8.25E-04  | 1.08E-03 | 5.70E-04  | -7.38E-04 | 1.55E-03  |
| 4.51E-06 | -1.29E-04 | 1.28E-03 | 8.50E-04  | 4.76E-04  | 1.20E-03  |
| 4.54E-06 | 8.56E-04  | 1.93E-03 | 1.02E-03  | -4.36E-04 | 4.24E-04  |
| 4.58E-06 | 7.57E-04  | 1.30E-03 | 1.01E-03  | -4.38E-04 | 7.25E-04  |
| 4.61E-06 | 3.02E-04  | 9.69E-04 | 1.24E-03  | -3.60E-05 | 1.34E-03  |
| 4.64E-06 | 9.28E-04  | 9.44E-04 | 8.43E-04  | 5.26E-04  | 9.71E-04  |
| 4.67E-06 | 4.81E-06  | 1.59E-03 | 1.08E-03  | -1.33E-04 | 5.28E-04  |
| 4.70E-06 | 3.13E-04  | 1.50E-03 | 7.71E-04  | -5.16E-04 | 1.23E-03  |
| 4.74E-06 | -2.92E-04 | 1.01E-03 | 1.11E-03  | -4.81E-04 | 1.11E-03  |
| 4.77E-06 | 4.82E-04  | 1.62E-03 | 2.95E-04  | -2.18E-04 | 1.48E-03  |
| 4.80E-06 | 5.62E-04  | 1.16E-03 | 8.19E-04  | 1.44E-04  | 1.19E-03  |
| 4.83E-06 | 6.26E-04  | 1.80E-03 | 6.13E-04  | 5.53E-05  | 9.62E-04  |
| 4.86E-06 | 2.76E-04  | 6.13E-04 | 7.53E-04  | -1.11E-04 | 9.24E-04  |
| 4.90E-06 | 8.35E-04  | 1.02E-03 | 5.50E-04  | -5.27E-04 | 1.43E-03  |
| 4.93E-06 | 2.83E-04  | 6.44E-04 | 8.91E-04  | -1.01E-03 | 8.94E-04  |
| 4.96E-06 | -1.06E-04 | 6.90E-04 | 1.24E-03  | -1.42E-04 | 1.03E-03  |
| 4.99E-06 | -1.13E-05 | 1.10E-03 | 6.19E-04  | -5.22E-04 | 1.12E-03  |
| 5.02E-06 | 4.67E-04  | 1.07E-03 | 5.92E-04  | -7.96E-04 | 1.05E-03  |
| 5.06E-06 | 4.35E-04  | 1.76E-03 | 5.74E-04  | -7.19E-04 | 1.17E-03  |
| 5.09E-06 | 4.59E-04  | 8.24E-04 | 3.71E-04  | -3.53E-04 | 1.24E-03  |
| 5.12E-06 | 6.14E-04  | 1.74E-03 | 7.17E-04  | -1.87E-04 | 1.30E-03  |
| 5.15E-06 | 4.14E-04  | 1.39E-03 | 5.09E-04  | 1.06E-05  | 8.89E-04  |
| 5.18E-06 | -7.71E-05 | 1.66E-03 | 1.07E-03  | -1.67E-04 | 5.87E-04  |
| 5.22E-06 | 3.82E-04  | 1.28E-03 | 9.68E-04  | -4.09E-04 | 1.33E-03  |
| 5.25E-06 | 3.47E-04  | 8.73E-04 | 2.53E-04  | -3.56E-04 | 9.47E-04  |
| 5.28E-06 | 1.04E-04  | 9.33E-04 | 1.14E-03  | -5.87E-05 | 1.34E-03  |
| 5.31E-06 | 9.06E-04  | 1.66E-03 | 4.29E-04  | -6.12E-04 | 1.33E-03  |
| 5.34E-06 | 6.07E-04  | 5.16E-04 | 8.61E-04  | -2.96E-05 | 8.24E-04  |
| 5.38E-06 | 5.37E-04  | 1.40E-03 | 3.39E-04  | -6.59E-04 | 1.01E-03  |
| 5.41E-06 | 2.21E-04  | 1.55E-03 | -1.01E-04 | -2.76E-04 | 9.23E-04  |
| 5.44E-06 | 3.44E-04  | 1.57E-03 | 3.04E-04  | -1.47E-04 | 3.42E-04  |
| 5.47E-06 | 7.80E-04  | 1.47E-03 | 1.16E-03  | -5.70E-04 | 9.37E-04  |
| 5.50E-06 | 3.29E-04  | 1.41E-03 | 8.19E-05  | -9.70E-04 | 5.40E-04  |
| 5.54E-06 | 2.00E-04  | 2.33E-03 | 5.82E-04  | -7.28E-04 | 7.71E-04  |
| 5.57E-06 | 7.96E-04  | 2.14E-03 | 6.14E-04  | -2.69E-04 | 4.40E-04  |
| 5.60E-06 | 1.08E-03  | 1.47E-03 | 9.65E-04  | -3.99E-04 | 1.37E-03  |
| 5.63E-06 | 1.03E-03  | 2.19E-03 | 3.80E-04  | -1.98E-04 | 7.64E-04  |
| 5.66E-06 | 5.82E-04  | 1.55E-03 | 6.25E-04  | 6.69E-05  | 1.03E-03  |
| 5.70E-06 | 3.31E-04  | 1.24E-03 | 6.70E-04  | -1.22E-04 | 7.74E-04  |
| 5.73E-06 | 6.78E-04  | 1.63E-03 | 4.26E-05  | -5.62E-04 | 1.06E-03  |

|          |           |          |           |           |          |
|----------|-----------|----------|-----------|-----------|----------|
| 5.76E-06 | 4.39E-04  | 1.62E-03 | 7.42E-04  | -1.90E-04 | 4.27E-04 |
| 5.79E-06 | 2.28E-04  | 2.26E-03 | 6.97E-04  | 5.93E-04  | 1.08E-03 |
| 5.82E-06 | 1.79E-04  | 1.79E-03 | 8.79E-04  | -1.31E-05 | 1.27E-03 |
| 5.86E-06 | 1.07E-05  | 1.17E-03 | 7.35E-04  | 5.44E-04  | 8.96E-04 |
| 5.89E-06 | -1.26E-04 | 2.23E-03 | 7.33E-04  | -6.86E-04 | 1.02E-03 |
| 5.92E-06 | 5.75E-04  | 1.79E-03 | 7.81E-04  | -5.82E-04 | 1.04E-03 |
| 5.95E-06 | 7.41E-04  | 1.92E-03 | 1.03E-03  | -6.17E-04 | 1.45E-03 |
| 5.98E-06 | 1.95E-04  | 1.11E-03 | 4.26E-04  | 8.79E-05  | 1.06E-03 |
| 6.02E-06 | 2.88E-04  | 2.03E-03 | -1.19E-04 | 1.44E-04  | 7.20E-04 |
| 6.05E-06 | 5.19E-04  | 1.56E-03 | 6.12E-04  | -9.17E-04 | 1.00E-03 |
| 6.08E-06 | 6.73E-04  | 1.50E-03 | 6.56E-04  | -4.23E-04 | 8.07E-04 |
| 6.11E-06 | 5.17E-04  | 1.38E-03 | 6.49E-04  | 3.02E-04  | 1.18E-03 |
| 6.14E-06 | 6.49E-04  | 1.98E-03 | 7.59E-04  | 2.49E-04  | 9.90E-04 |
| 6.18E-06 | 7.96E-04  | 1.88E-03 | 1.28E-03  | -1.16E-03 | 7.76E-04 |
| 6.21E-06 | 5.25E-04  | 2.42E-03 | 1.00E-03  | -5.66E-04 | 9.78E-04 |
| 6.24E-06 | 2.58E-04  | 9.42E-04 | 5.75E-04  | -1.43E-04 | 1.20E-03 |
| 6.27E-06 | 2.48E-04  | 7.75E-04 | 1.01E-03  | -6.46E-05 | 9.38E-04 |
| 6.30E-06 | 7.94E-04  | 1.53E-03 | 6.02E-04  | 1.84E-04  | 9.57E-04 |
| 6.34E-06 | 2.17E-04  | 1.26E-03 | 6.17E-04  | -3.64E-04 | 5.78E-04 |
| 6.37E-06 | 5.18E-04  | 1.68E-03 | -2.39E-04 | -5.38E-04 | 7.46E-04 |
| 6.40E-06 | 6.16E-04  | 1.89E-03 | -2.30E-04 | -4.42E-04 | 8.72E-04 |
| 6.43E-06 | 9.03E-04  | 1.42E-03 | 2.06E-04  | -8.20E-05 | 1.25E-03 |
| 6.46E-06 | 3.78E-04  | 1.92E-03 | 8.03E-04  | -2.89E-04 | 1.25E-03 |
| 6.50E-06 | 5.81E-04  | 1.12E-03 | 4.82E-04  | -4.91E-05 | 1.31E-03 |
| 6.53E-06 | 4.78E-04  | 2.04E-03 | 3.69E-04  | 2.83E-05  | 8.17E-04 |
| 6.56E-06 | 2.02E-04  | 1.21E-03 | 9.10E-04  | -1.41E-04 | 6.29E-04 |
| 6.59E-06 | 3.13E-04  | 1.20E-03 | 2.67E-04  | 2.27E-04  | 1.15E-03 |
| 6.62E-06 | 5.94E-04  | 1.67E-03 | 4.34E-04  | 2.07E-05  | 8.60E-04 |
| 6.66E-06 | 6.67E-04  | 1.60E-03 | 1.03E-03  | -4.23E-04 | 1.43E-03 |
| 6.69E-06 | 6.99E-04  | 2.11E-03 | 2.89E-04  | 2.75E-04  | 5.01E-04 |
| 6.72E-06 | -9.04E-06 | 1.34E-03 | 3.32E-04  | -8.24E-04 | 8.87E-04 |
| 6.75E-06 | 1.79E-04  | 1.12E-03 | 7.18E-04  | -2.73E-04 | 8.35E-04 |
| 6.78E-06 | 3.84E-04  | 2.08E-03 | 5.10E-04  | -2.03E-04 | 9.35E-04 |
| 6.82E-06 | 7.50E-04  | 1.64E-03 | 2.42E-04  | -4.66E-04 | 1.13E-03 |
| 6.85E-06 | 6.23E-04  | 9.58E-04 | 1.12E-03  | -6.25E-07 | 9.62E-04 |
| 6.88E-06 | 9.48E-04  | 1.14E-03 | 5.56E-04  | -3.74E-04 | 8.30E-04 |
| 6.91E-06 | 6.99E-04  | 1.67E-03 | 5.16E-04  | -4.89E-06 | 6.98E-04 |
| 6.94E-06 | -1.73E-04 | 1.62E-03 | 2.09E-04  | -7.02E-04 | 1.01E-03 |
| 6.98E-06 | 5.47E-04  | 2.24E-03 | 1.09E-03  | -1.17E-04 | 1.07E-03 |
| 7.01E-06 | 5.19E-04  | 1.62E-03 | 7.50E-04  | -1.59E-04 | 1.24E-03 |
| 7.04E-06 | 4.75E-04  | 1.56E-03 | 2.72E-04  | 1.96E-04  | 8.57E-04 |
| 7.07E-06 | -1.63E-04 | 1.85E-03 | 4.58E-04  | 6.05E-05  | 8.25E-04 |
| 7.10E-06 | 6.65E-04  | 1.93E-03 | 3.51E-04  | -1.08E-04 | 1.07E-03 |
| 7.14E-06 | -9.70E-06 | 2.03E-03 | 5.76E-04  | -1.87E-04 | 8.83E-04 |
| 7.17E-06 | 1.67E-04  | 2.22E-03 | 6.08E-04  | 6.01E-05  | 1.04E-03 |
| 7.20E-06 | 3.98E-04  | 1.76E-03 | 7.29E-05  | -1.34E-04 | 6.54E-04 |
| 7.23E-06 | -6.12E-05 | 1.03E-03 | 1.18E-04  | -7.74E-04 | 1.09E-03 |
| 7.26E-06 | 4.20E-04  | 7.55E-04 | 9.09E-04  | -1.25E-05 | 9.53E-04 |
| 7.30E-06 | 1.81E-04  | 1.42E-03 | 8.02E-04  | -2.73E-04 | 4.47E-04 |
| 7.33E-06 | 8.16E-04  | 1.83E-03 | 5.48E-04  | -3.43E-04 | 1.07E-03 |
| 7.36E-06 | 4.78E-04  | 1.11E-03 | 1.13E-03  | -1.13E-04 | 1.08E-03 |
| 7.39E-06 | 5.27E-04  | 9.94E-04 | 4.56E-05  | 1.70E-04  | 7.31E-04 |
| 7.42E-06 | 1.73E-04  | 8.61E-04 | 6.18E-04  | 1.00E-04  | 7.76E-04 |
| 7.46E-06 | 7.67E-05  | 1.29E-03 | 1.09E-03  | -5.75E-04 | 9.11E-04 |

|          |          |          |           |           |           |
|----------|----------|----------|-----------|-----------|-----------|
| 7.49E-06 | 5.59E-04 | 1.34E-03 | 3.64E-04  | -3.59E-04 | 2.65E-04  |
| 7.52E-06 | 8.64E-04 | 1.68E-03 | 6.20E-04  | -5.55E-04 | 1.14E-03  |
| 7.55E-06 | 8.23E-04 | 1.33E-03 | 3.44E-04  | -1.22E-04 | 7.19E-04  |
| 7.58E-06 | 4.84E-04 | 1.49E-03 | 1.49E-03  | -5.12E-04 | 7.69E-04  |
| 7.62E-06 | 3.72E-04 | 9.74E-04 | 5.01E-04  | -2.12E-04 | 9.94E-04  |
| 7.65E-06 | 5.35E-04 | 1.26E-03 | 8.21E-04  | -2.52E-04 | 7.43E-04  |
| 7.68E-06 | 7.73E-04 | 1.53E-03 | 3.78E-04  | -9.51E-05 | 9.48E-04  |
| 7.71E-06 | 3.48E-05 | 1.92E-03 | -1.08E-04 | -7.44E-05 | 6.21E-04  |
| 7.74E-06 | 4.18E-04 | 1.02E-03 | 6.15E-04  | -1.22E-05 | 7.41E-04  |
| 7.78E-06 | 4.27E-04 | 1.33E-03 | 7.53E-04  | 2.74E-04  | 7.35E-04  |
| 7.81E-06 | 7.05E-04 | 9.14E-04 | 1.23E-03  | -2.17E-04 | 1.13E-03  |
| 7.84E-06 | 6.08E-05 | 1.37E-03 | 9.10E-04  | -5.51E-04 | 1.38E-03  |
| 7.87E-06 | 2.43E-04 | 1.80E-03 | 1.06E-03  | -5.13E-04 | 8.58E-04  |
| 7.90E-06 | 6.52E-05 | 1.73E-03 | 5.45E-04  | -2.08E-05 | 8.42E-04  |
| 7.94E-06 | 4.47E-04 | 1.18E-03 | 1.10E-03  | -3.90E-04 | 2.30E-04  |
| 7.97E-06 | 7.63E-04 | 1.62E-03 | 5.18E-04  | 2.87E-05  | 2.88E-04  |
| 8.00E-06 | 4.92E-04 | 1.50E-03 | 5.57E-04  | -1.88E-04 | 1.32E-03  |
| 8.03E-06 | 3.05E-04 | 1.04E-03 | 6.09E-04  | -3.28E-04 | 7.20E-04  |
| 8.06E-06 | 1.33E-03 | 6.52E-04 | 6.92E-04  | -4.00E-04 | 1.24E-04  |
| 8.10E-06 | 1.97E-04 | 1.02E-03 | 6.71E-04  | -4.81E-04 | 4.80E-04  |
| 8.13E-06 | 2.80E-04 | 1.49E-03 | 7.31E-04  | -3.22E-04 | 3.40E-04  |
| 8.16E-06 | 6.76E-04 | 1.45E-03 | 3.42E-04  | -8.88E-06 | 7.17E-04  |
| 8.19E-06 | 7.00E-04 | 1.41E-03 | 6.86E-04  | -4.33E-04 | 1.08E-03  |
| 8.22E-06 | 4.59E-04 | 1.38E-03 | 8.43E-04  | -5.46E-04 | 1.04E-03  |
| 8.26E-06 | 5.37E-04 | 9.58E-04 | 4.83E-04  | -2.21E-04 | 1.45E-03  |
| 8.29E-06 | 8.20E-04 | 1.45E-03 | 6.09E-04  | -3.70E-04 | 1.04E-03  |
| 8.32E-06 | 4.49E-04 | 7.09E-04 | 6.55E-04  | -4.84E-04 | 2.54E-04  |
| 8.35E-06 | 2.89E-04 | 1.21E-03 | 5.46E-04  | -5.18E-04 | 8.77E-04  |
| 8.38E-06 | 2.49E-04 | 1.16E-03 | 3.17E-04  | -3.46E-04 | 5.00E-04  |
| 8.42E-06 | 6.57E-04 | 1.53E-03 | 5.86E-04  | -9.01E-04 | 8.19E-04  |
| 8.45E-06 | 8.58E-04 | 6.72E-04 | 4.52E-04  | -3.59E-04 | 7.73E-04  |
| 8.48E-06 | 3.65E-04 | 1.02E-03 | 7.38E-04  | -4.31E-04 | 8.57E-04  |
| 8.51E-06 | 5.09E-04 | 8.22E-04 | 5.83E-04  | -4.44E-04 | 3.30E-04  |
| 8.54E-06 | 6.55E-04 | 1.09E-03 | 7.05E-04  | -1.68E-04 | 1.28E-03  |
| 8.58E-06 | 9.06E-04 | 1.55E-03 | 9.12E-04  | -6.53E-04 | 5.46E-04  |
| 8.61E-06 | 5.75E-04 | 1.07E-03 | 4.99E-04  | -2.10E-04 | 1.87E-03  |
| 8.64E-06 | 6.82E-04 | 1.19E-03 | 8.40E-04  | -6.42E-04 | 8.42E-04  |
| 8.67E-06 | 7.71E-04 | 1.47E-03 | 1.06E-03  | -5.89E-04 | 3.00E-04  |
| 8.70E-06 | 6.44E-04 | 1.34E-03 | 1.08E-03  | 2.03E-04  | -4.02E-04 |
| 8.74E-06 | 8.22E-04 | 1.36E-03 | 7.52E-04  | -3.91E-04 | 6.98E-04  |
| 8.77E-06 | 8.64E-04 | 1.30E-03 | 7.94E-04  | -2.55E-04 | 5.44E-04  |
| 8.80E-06 | 4.51E-04 | 1.09E-03 | 7.67E-04  | -3.72E-04 | 3.52E-04  |
| 8.83E-06 | 9.05E-04 | 1.70E-03 | 9.82E-04  | -1.10E-04 | 7.22E-04  |
| 8.86E-06 | 6.13E-04 | 1.52E-03 | 1.08E-03  | -3.59E-04 | 1.24E-03  |
| 8.90E-06 | 8.19E-04 | 1.49E-03 | 1.15E-03  | -5.82E-04 | 1.01E-03  |
| 8.93E-06 | 3.93E-04 | 1.22E-03 | 6.06E-04  | -4.14E-05 | 1.12E-03  |
| 8.96E-06 | 1.41E-04 | 9.83E-04 | 1.05E-03  | -6.36E-04 | 3.04E-04  |
| 8.99E-06 | 6.79E-04 | 1.41E-03 | 4.96E-04  | -2.20E-04 | 2.39E-04  |
| 9.02E-06 | 7.54E-04 | 1.83E-03 | 2.14E-04  | 5.10E-05  | 5.82E-04  |
| 9.06E-06 | 5.68E-04 | 1.62E-03 | 9.09E-04  | -1.93E-04 | 1.15E-05  |
| 9.09E-06 | 6.59E-04 | 1.05E-03 | 8.81E-04  | -3.49E-04 | 5.10E-04  |
| 9.12E-06 | 1.03E-03 | 9.22E-04 | 8.46E-04  | -2.41E-04 | 5.69E-04  |
| 9.15E-06 | 7.78E-04 | 1.44E-03 | 4.44E-04  | -3.48E-04 | 1.28E-03  |
| 9.18E-06 | 6.95E-04 | 1.19E-03 | 3.01E-04  | -2.90E-04 | 9.69E-04  |

|          |           |          |           |           |           |
|----------|-----------|----------|-----------|-----------|-----------|
| 9.22E-06 | 9.22E-04  | 1.68E-03 | 7.20E-04  | -3.47E-04 | 5.90E-04  |
| 9.25E-06 | 1.04E-04  | 1.22E-03 | 5.61E-04  | -6.22E-04 | 5.36E-04  |
| 9.28E-06 | 7.57E-04  | 1.67E-03 | 5.78E-04  | -5.85E-04 | 9.80E-04  |
| 9.31E-06 | 7.74E-04  | 1.54E-03 | 1.08E-03  | -3.30E-04 | 7.09E-04  |
| 9.34E-06 | 9.93E-04  | 1.47E-03 | 1.01E-03  | -5.65E-04 | 4.71E-04  |
| 9.38E-06 | 4.53E-04  | 1.17E-03 | 5.98E-04  | -2.97E-04 | 1.89E-04  |
| 9.41E-06 | 7.57E-04  | 9.39E-04 | 7.81E-04  | -2.53E-04 | 7.30E-04  |
| 9.44E-06 | 8.41E-04  | 8.79E-04 | 6.81E-04  | -8.10E-04 | 8.29E-04  |
| 9.47E-06 | 1.09E-03  | 8.00E-04 | 9.92E-04  | -7.48E-04 | 1.41E-03  |
| 9.50E-06 | 5.71E-04  | 1.08E-03 | 1.01E-03  | -4.84E-04 | 5.11E-04  |
| 9.54E-06 | 8.86E-04  | 1.15E-03 | 2.73E-04  | -4.95E-04 | 6.44E-04  |
| 9.57E-06 | 2.30E-04  | 1.20E-03 | 8.30E-04  | -1.49E-04 | -8.21E-05 |
| 9.60E-06 | 4.58E-04  | 8.72E-04 | 9.63E-04  | -2.62E-04 | 7.03E-04  |
| 9.63E-06 | 4.68E-04  | 9.51E-04 | 1.14E-03  | -2.93E-04 | 6.54E-04  |
| 9.66E-06 | 6.40E-04  | 8.02E-04 | 4.07E-05  | -4.78E-04 | 1.26E-03  |
| 9.70E-06 | 5.58E-04  | 9.28E-04 | -1.23E-04 | -7.13E-04 | 6.01E-04  |
| 9.73E-06 | 7.57E-04  | 9.40E-04 | 8.06E-04  | -4.26E-04 | 5.84E-04  |
| 9.76E-06 | 7.86E-04  | 1.25E-03 | 3.11E-04  | -7.63E-04 | 9.66E-04  |
| 9.79E-06 | 3.81E-04  | 8.83E-04 | 1.02E-03  | -6.19E-04 | 8.80E-04  |
| 9.82E-06 | -1.23E-04 | 8.12E-04 | 6.21E-04  | -5.38E-04 | 8.63E-04  |
| 9.86E-06 | 8.41E-04  | 1.02E-03 | 8.54E-04  | -5.45E-04 | 9.62E-04  |
| 9.89E-06 | 7.21E-04  | 1.23E-03 | 9.18E-04  | -4.65E-04 | 6.33E-04  |
| 9.92E-06 | 2.30E-04  | 1.11E-03 | 7.80E-04  | -6.97E-04 | 2.22E-04  |
| 9.95E-06 | 6.81E-04  | 8.80E-04 | 7.37E-04  | -5.66E-04 | 1.32E-03  |
| 9.98E-06 | 3.26E-04  | 1.20E-03 | 1.07E-03  | 1.99E-05  | 1.45E-04  |
| 1.00E-05 | 2.82E-04  | 1.11E-03 | 7.99E-04  | -6.50E-04 | 3.43E-04  |
| 1.01E-05 | 7.38E-04  | 1.18E-03 | 4.89E-04  | -4.57E-04 | 4.83E-04  |
| 1.01E-05 | 9.96E-04  | 1.55E-03 | 6.66E-04  | -8.64E-05 | 2.17E-04  |
| 1.01E-05 | 7.09E-04  | 1.42E-03 | 8.23E-04  | -5.10E-04 | -2.51E-05 |
| 1.01E-05 | 6.54E-04  | 1.22E-03 | 9.07E-04  | -7.70E-05 | 5.59E-04  |
| 1.02E-05 | 5.06E-04  | 8.05E-04 | 5.07E-04  | -3.28E-04 | 3.34E-04  |
| 1.02E-05 | 5.89E-04  | 8.84E-04 | 1.02E-03  | -4.34E-04 | 5.68E-04  |
| 1.02E-05 | 6.84E-04  | 1.00E-03 | 7.86E-04  | -3.18E-05 | 2.47E-04  |
| 1.03E-05 | 5.84E-04  | 1.48E-03 | 4.68E-04  | -5.33E-04 | 4.76E-04  |
| 1.03E-05 | 6.70E-04  | 9.94E-04 | 6.41E-04  | -6.45E-04 | -2.75E-05 |
| 1.03E-05 | 1.01E-03  | 9.20E-04 | 8.81E-04  | -5.78E-04 | 5.59E-04  |
| 1.04E-05 | 7.78E-04  | 1.20E-03 | 8.71E-04  | -5.66E-04 | 4.62E-04  |
| 1.04E-05 | 5.26E-04  | 8.98E-04 | 5.80E-04  | -7.07E-04 | 2.33E-04  |
| 1.04E-05 | 2.02E-04  | 1.04E-03 | 2.70E-04  | -7.06E-04 | 5.71E-04  |
| 1.05E-05 | 3.29E-04  | 9.54E-04 | 7.44E-04  | -5.67E-04 | 8.26E-05  |
| 1.05E-05 | 5.90E-04  | 1.19E-03 | 1.13E-03  | -5.33E-04 | 1.25E-04  |
| 1.05E-05 | 6.52E-04  | 9.53E-04 | 1.96E-04  | -5.70E-04 | 1.11E-03  |
| 1.06E-05 | 8.69E-04  | 9.37E-04 | 4.14E-04  | -1.36E-04 | 9.41E-05  |
| 1.06E-05 | 9.57E-04  | 1.26E-03 | 8.11E-04  | -5.21E-04 | 1.40E-03  |
| 1.06E-05 | 8.66E-04  | 1.25E-03 | 7.48E-04  | -4.35E-04 | 3.23E-04  |
| 1.07E-05 | 5.49E-04  | 9.95E-04 | 1.00E-03  | -5.88E-04 | 1.59E-04  |
| 1.07E-05 | 7.80E-04  | 9.35E-04 | 9.59E-04  | -4.19E-04 | 4.95E-04  |
| 1.07E-05 | 2.09E-04  | 1.53E-03 | 5.05E-04  | -2.34E-04 | 9.16E-04  |
| 1.08E-05 | 4.56E-04  | 1.00E-03 | 6.30E-04  | -1.20E-04 | 9.15E-04  |
| 1.08E-05 | 6.13E-04  | 9.57E-04 | 5.79E-04  | -2.73E-04 | 1.23E-03  |
| 1.08E-05 | 4.89E-04  | 1.23E-03 | 1.08E-03  | -4.29E-04 | 6.74E-04  |
| 1.09E-05 | 4.81E-04  | 7.85E-04 | 9.31E-04  | -5.25E-04 | 8.51E-04  |
| 1.09E-05 | 9.73E-05  | 1.10E-03 | 6.19E-04  | -1.78E-04 | 5.82E-04  |
| 1.09E-05 | 9.11E-04  | 1.07E-03 | 4.63E-04  | -6.29E-04 | 5.40E-04  |



|          |           |          |           |           |           |
|----------|-----------|----------|-----------|-----------|-----------|
| 1.09E-05 | 2.99E-04  | 1.03E-03 | 8.90E-04  | -4.99E-04 | 4.61E-04  |
| 1.10E-05 | 5.26E-04  | 9.79E-04 | 1.03E-03  | -3.29E-04 | 4.46E-04  |
| 1.10E-05 | 4.85E-04  | 1.15E-03 | 5.12E-04  | -4.56E-04 | 6.07E-04  |
| 1.10E-05 | 5.11E-04  | 8.94E-04 | 6.82E-04  | -2.48E-04 | 4.52E-04  |
| 1.11E-05 | 4.37E-04  | 7.46E-04 | 5.84E-04  | -4.99E-04 | 4.75E-04  |
| 1.11E-05 | 1.06E-03  | 8.99E-04 | 1.12E-03  | -7.29E-04 | 8.41E-04  |
| 1.11E-05 | 8.84E-04  | 1.15E-03 | 6.31E-04  | -4.30E-04 | 1.02E-03  |
| 1.12E-05 | 4.81E-04  | 1.00E-03 | 8.26E-04  | -3.14E-04 | -1.68E-04 |
| 1.12E-05 | 4.95E-04  | 1.14E-03 | 3.14E-04  | -3.10E-04 | 3.40E-04  |
| 1.12E-05 | 5.44E-04  | 1.58E-03 | 8.93E-04  | -4.16E-04 | 1.87E-04  |
| 1.13E-05 | 6.73E-04  | 1.02E-03 | 1.32E-03  | -4.99E-04 | 4.64E-04  |
| 1.13E-05 | 6.85E-04  | 1.08E-03 | 9.14E-04  | 1.97E-05  | 6.02E-04  |
| 1.13E-05 | 6.58E-04  | 1.06E-03 | -2.50E-04 | 1.25E-05  | 4.85E-04  |
| 1.14E-05 | 3.51E-04  | 8.67E-04 | 4.40E-04  | -7.04E-04 | 1.93E-04  |
| 1.14E-05 | 6.17E-04  | 1.09E-03 | 7.33E-04  | -6.16E-04 | -2.49E-04 |
| 1.14E-05 | 5.28E-04  | 1.00E-03 | 7.98E-04  | -3.98E-06 | 6.43E-04  |
| 1.15E-05 | 6.32E-04  | 1.11E-03 | 1.05E-03  | -2.11E-04 | 1.66E-05  |
| 1.15E-05 | 9.44E-04  | 8.23E-04 | 8.99E-04  | -2.16E-04 | 1.34E-04  |
| 1.15E-05 | 7.64E-04  | 9.21E-04 | 6.63E-04  | -7.42E-04 | 4.36E-04  |
| 1.16E-05 | 4.95E-04  | 1.00E-03 | 3.55E-04  | -1.30E-05 | 5.89E-04  |
| 1.16E-05 | 1.68E-04  | 1.16E-03 | 4.34E-04  | -3.16E-04 | 5.57E-04  |
| 1.16E-05 | 2.85E-04  | 8.31E-04 | 5.47E-04  | -4.62E-04 | 2.52E-04  |
| 1.17E-05 | 6.73E-04  | 1.14E-03 | 4.61E-04  | -7.00E-04 | 3.32E-04  |
| 1.17E-05 | 8.27E-04  | 1.72E-03 | 6.47E-04  | 1.96E-04  | 2.05E-04  |
| 1.17E-05 | 7.37E-04  | 1.01E-03 | 1.15E-03  | 4.09E-04  | 1.47E-04  |
| 1.17E-05 | 6.61E-04  | 1.16E-03 | 5.87E-04  | -1.95E-04 | 3.94E-04  |
| 1.18E-05 | 1.35E-04  | 1.61E-03 | 9.75E-04  | -3.26E-05 | 1.15E-04  |
| 1.18E-05 | 1.05E-03  | 7.76E-04 | 8.90E-04  | -3.11E-04 | 7.86E-04  |
| 1.18E-05 | 8.51E-04  | 1.12E-03 | 1.04E-03  | -6.86E-04 | 3.44E-08  |
| 1.19E-05 | 6.21E-04  | 9.37E-04 | 8.74E-04  | -3.88E-04 | -1.39E-04 |
| 1.19E-05 | 5.54E-04  | 1.28E-03 | 1.17E-03  | -7.66E-04 | 6.48E-04  |
| 1.19E-05 | 4.74E-04  | 8.43E-04 | 1.24E-03  | -6.81E-04 | 6.00E-04  |
| 1.20E-05 | 6.11E-04  | 9.14E-04 | 8.88E-04  | -7.30E-04 | 2.42E-04  |
| 1.20E-05 | 1.13E-04  | 7.57E-04 | 1.07E-03  | -4.23E-04 | 8.89E-04  |
| 1.20E-05 | 9.40E-04  | 1.08E-03 | 5.89E-04  | -4.06E-04 | 6.22E-04  |
| 1.21E-05 | 4.49E-04  | 9.70E-04 | 7.92E-04  | -1.18E-04 | 2.93E-04  |
| 1.21E-05 | 8.43E-04  | 9.63E-04 | 2.37E-04  | -5.28E-04 | 5.10E-04  |
| 1.21E-05 | 2.75E-04  | 8.73E-04 | 6.43E-04  | 8.05E-05  | 7.56E-04  |
| 1.22E-05 | 6.85E-04  | 1.34E-03 | 6.65E-04  | -2.54E-04 | 2.18E-04  |
| 1.22E-05 | 9.40E-04  | 1.12E-03 | 4.16E-04  | -2.15E-04 | 2.68E-04  |
| 1.22E-05 | 6.82E-04  | 7.52E-04 | 7.77E-04  | -3.35E-04 | 7.13E-04  |
| 1.23E-05 | 4.52E-04  | 6.07E-04 | 8.64E-04  | -6.91E-04 | 7.09E-04  |
| 1.23E-05 | 9.00E-04  | 8.20E-04 | 1.14E-03  | -7.87E-04 | 3.15E-04  |
| 1.23E-05 | 3.23E-04  | 1.08E-03 | 1.14E-03  | -6.40E-04 | 7.39E-04  |
| 1.24E-05 | 3.76E-04  | 1.40E-03 | 9.67E-04  | -4.44E-04 | 7.34E-04  |
| 1.24E-05 | -1.38E-04 | 1.08E-03 | 8.10E-04  | -6.14E-04 | 4.18E-04  |
| 1.24E-05 | 9.36E-04  | 1.03E-03 | 9.72E-04  | -4.07E-05 | 5.50E-04  |
| 1.25E-05 | 5.86E-04  | 9.51E-04 | 9.47E-04  | -3.21E-04 | 2.54E-04  |
| 1.25E-05 | -1.93E-05 | 8.41E-04 | 6.92E-04  | -6.22E-04 | -7.42E-05 |
| 1.25E-05 | -1.59E-05 | 1.17E-03 | 3.37E-04  | -4.04E-04 | 6.61E-04  |
| 1.25E-05 | 3.89E-04  | 1.13E-03 | 8.07E-04  | -1.99E-04 | 3.84E-04  |
| 1.26E-05 | 3.76E-06  | 4.95E-04 | 6.18E-04  | -5.37E-04 | 7.47E-04  |
| 1.26E-05 | 2.96E-04  | 3.71E-04 | 8.73E-04  | -3.74E-04 | 4.68E-04  |
| 1.26E-05 | 1.46E-04  | 9.31E-04 | 4.18E-04  | -2.13E-04 | 4.14E-04  |

|          |           |          |           |           |           |
|----------|-----------|----------|-----------|-----------|-----------|
| 1.27E-05 | 7.51E-04  | 9.21E-04 | 6.16E-04  | -7.95E-04 | 5.46E-04  |
| 1.27E-05 | 2.17E-04  | 1.21E-03 | -1.45E-05 | -4.61E-04 | 6.41E-04  |
| 1.27E-05 | 4.48E-04  | 1.33E-03 | 4.02E-04  | -1.48E-04 | 3.97E-04  |
| 1.28E-05 | 6.07E-04  | 1.36E-03 | 1.29E-03  | -3.20E-04 | 2.34E-06  |
| 1.28E-05 | 2.67E-04  | 1.02E-03 | 1.19E-03  | -5.19E-04 | 7.38E-04  |
| 1.28E-05 | 3.59E-04  | 1.10E-03 | -1.60E-04 | -1.86E-04 | 4.73E-04  |
| 1.29E-05 | 6.29E-04  | 9.63E-04 | 9.54E-04  | -5.52E-04 | 4.51E-04  |
| 1.29E-05 | -7.18E-05 | 9.04E-04 | 1.06E-04  | -1.17E-04 | 1.89E-04  |
| 1.29E-05 | 9.38E-05  | 1.06E-03 | 3.49E-04  | -1.02E-04 | 5.94E-04  |
| 1.30E-05 | 7.41E-04  | 9.04E-04 | 3.25E-04  | -1.15E-04 | 4.67E-04  |
| 1.30E-05 | 3.07E-04  | 6.94E-04 | 7.44E-04  | -4.46E-05 | 7.81E-04  |
| 1.30E-05 | 9.02E-04  | 8.27E-04 | 6.00E-04  | -4.00E-04 | 5.01E-04  |
| 1.31E-05 | 8.81E-04  | 9.58E-04 | 7.90E-04  | -1.63E-04 | 8.05E-04  |
| 1.31E-05 | 4.56E-04  | 8.99E-04 | 7.14E-04  | -4.60E-04 | 7.65E-04  |
| 1.31E-05 | 1.50E-04  | 6.62E-04 | 7.87E-04  | -5.07E-04 | -4.12E-05 |
| 1.32E-05 | 6.33E-04  | 1.10E-03 | 1.04E-03  | -4.11E-04 | 4.32E-04  |
| 1.32E-05 | 4.91E-04  | 6.31E-04 | -2.53E-04 | -2.47E-05 | 2.33E-04  |
| 1.32E-05 | -1.27E-04 | 1.48E-03 | 5.21E-04  | -6.81E-04 | 7.67E-04  |
| 1.33E-05 | 6.60E-04  | 8.48E-04 | 8.39E-04  | -2.81E-04 | 5.10E-04  |
| 1.33E-05 | 4.92E-04  | 9.50E-04 | 7.90E-04  | -1.21E-04 | 2.82E-04  |
| 1.33E-05 | 1.16E-04  | 8.12E-04 | 4.10E-04  | -5.51E-04 | 2.36E-04  |
| 1.33E-05 | 1.02E-03  | 1.12E-03 | 4.17E-04  | -2.96E-04 | 5.17E-04  |
| 1.34E-05 | 4.87E-04  | 1.08E-03 | 4.61E-04  | -4.44E-04 | 8.29E-04  |
| 1.34E-05 | 8.25E-04  | 1.22E-03 | 1.78E-04  | -7.87E-04 | 3.49E-04  |
| 1.34E-05 | 3.15E-04  | 1.20E-03 | 4.64E-04  | -5.34E-04 | 1.15E-03  |
| 1.35E-05 | 7.71E-04  | 1.09E-03 | 4.99E-04  | -7.29E-04 | 6.08E-04  |
| 1.35E-05 | 4.42E-04  | 1.27E-03 | -8.89E-05 | -5.76E-04 | 3.98E-04  |
| 1.35E-05 | 5.26E-04  | 1.04E-03 | 8.92E-05  | -1.41E-04 | 5.54E-04  |
| 1.36E-05 | -2.67E-05 | 1.38E-03 | 2.56E-04  | -2.59E-04 | 6.93E-04  |
| 1.36E-05 | 3.23E-04  | 1.03E-03 | 4.03E-04  | -6.57E-04 | 2.57E-04  |
| 1.36E-05 | -4.66E-05 | 1.20E-03 | 6.70E-04  | -1.82E-04 | 1.05E-03  |
| 1.37E-05 | 3.67E-04  | 1.40E-03 | 1.72E-04  | -3.74E-04 | 7.36E-04  |
| 1.37E-05 | 2.62E-05  | 1.39E-03 | 4.86E-04  | 7.79E-05  | 4.14E-04  |
| 1.37E-05 | 1.89E-04  | 8.19E-04 | 2.56E-04  | -5.43E-04 | -3.85E-05 |
| 1.38E-05 | -1.74E-04 | 6.65E-04 | 1.51E-04  | 2.12E-04  | 4.51E-04  |
| 1.38E-05 | 4.74E-04  | 8.83E-04 | 6.11E-04  | -5.02E-04 | 7.46E-04  |
| 1.38E-05 | 5.63E-04  | 1.09E-03 | 9.39E-04  | -1.41E-06 | 6.33E-04  |
| 1.39E-05 | 3.89E-04  | 1.28E-03 | 4.39E-04  | -9.23E-05 | 4.17E-04  |
| 1.39E-05 | 4.72E-04  | 1.15E-03 | 1.46E-04  | -5.83E-04 | 9.55E-04  |
| 1.39E-05 | 1.11E-04  | 1.28E-03 | 2.84E-04  | -7.66E-04 | 4.79E-04  |
| 1.40E-05 | 5.93E-04  | 1.21E-03 | -2.78E-04 | -5.18E-04 | 1.16E-03  |
| 1.40E-05 | -1.63E-05 | 1.13E-03 | 4.57E-04  | -6.64E-04 | 3.30E-04  |
| 1.40E-05 | 3.72E-04  | 1.41E-03 | 6.82E-04  | -1.88E-04 | 7.71E-04  |
| 1.41E-05 | 2.25E-04  | 8.06E-04 | 7.95E-04  | -8.30E-05 | 1.04E-03  |
| 1.41E-05 | 1.02E-03  | 9.15E-04 | 8.05E-04  | -4.20E-04 | 8.11E-04  |
| 1.41E-05 | 4.64E-05  | 7.24E-04 | 2.03E-05  | -9.36E-04 | 7.24E-04  |
| 1.41E-05 | -3.11E-04 | 1.44E-03 | 4.60E-05  | -5.32E-04 | 4.99E-04  |
| 1.42E-05 | 3.09E-04  | 1.10E-03 | 2.80E-04  | -8.34E-04 | 6.00E-04  |
| 1.42E-05 | 1.99E-04  | 1.00E-03 | 6.61E-05  | 1.23E-04  | 2.14E-04  |
| 1.42E-05 | 3.37E-04  | 9.15E-04 | 7.50E-04  | 2.33E-04  | 3.12E-04  |
| 1.43E-05 | 2.21E-04  | 9.25E-04 | 4.60E-04  | 3.13E-05  | 4.96E-04  |
| 1.43E-05 | 3.89E-04  | 1.03E-03 | 1.58E-04  | -2.64E-04 | 1.41E-03  |
| 1.43E-05 | 1.90E-04  | 4.77E-04 | 4.72E-04  | -5.72E-04 | 1.10E-03  |
| 1.44E-05 | 2.57E-04  | 1.05E-03 | 2.00E-04  | -6.66E-04 | 7.59E-04  |

|          |           |          |           |           |          |
|----------|-----------|----------|-----------|-----------|----------|
| 1.44E-05 | -4.16E-04 | 1.17E-03 | 7.24E-04  | 3.15E-04  | 7.14E-04 |
| 1.44E-05 | 9.46E-04  | 1.24E-03 | 4.62E-04  | -2.02E-04 | 2.98E-04 |
| 1.45E-05 | 3.63E-04  | 1.12E-03 | 1.21E-04  | -2.74E-04 | 8.47E-04 |
| 1.45E-05 | 6.48E-04  | 1.05E-03 | 1.46E-04  | -2.76E-04 | 1.09E-03 |
| 1.45E-05 | 1.91E-05  | 9.48E-04 | -4.09E-05 | 2.07E-04  | 4.87E-04 |
| 1.46E-05 | 2.47E-04  | 1.22E-03 | 6.79E-04  | -6.57E-04 | 9.28E-04 |
| 1.46E-05 | 5.31E-04  | 1.50E-03 | 7.46E-04  | 1.94E-05  | 6.65E-04 |
| 1.46E-05 | -5.91E-05 | 1.19E-03 | 3.89E-04  | -6.83E-04 | 2.26E-04 |
| 1.47E-05 | 4.76E-04  | 1.41E-03 | 4.84E-04  | 1.35E-04  | 3.82E-04 |
| 1.47E-05 | 3.61E-04  | 1.26E-03 | 1.22E-04  | -3.22E-04 | 4.06E-04 |
| 1.47E-05 | 3.32E-04  | 7.02E-04 | 3.32E-04  | 6.87E-06  | 8.36E-04 |
| 1.48E-05 | -2.80E-04 | 1.33E-03 | 1.43E-04  | -3.89E-04 | 4.17E-04 |
| 1.48E-05 | -1.80E-04 | 1.10E-03 | 5.08E-04  | -4.70E-04 | 6.68E-04 |
| 1.48E-05 | 2.90E-04  | 9.17E-04 | -1.49E-04 | -5.07E-04 | 8.64E-04 |
| 1.49E-05 | 4.31E-04  | 1.08E-03 | -4.70E-06 | -9.84E-05 | 8.40E-04 |
| 1.49E-05 | 1.78E-04  | 1.27E-03 | 3.74E-05  | 1.39E-04  | 8.90E-04 |
| 1.49E-05 | 4.82E-04  | 1.03E-03 | 1.08E-03  | -5.56E-04 | 5.13E-04 |
| 1.49E-05 | 1.53E-04  | 7.77E-04 | 4.36E-04  | 4.61E-04  | 6.52E-04 |
| 1.50E-05 | -2.96E-04 | 1.07E-03 | 9.26E-04  | -7.85E-04 | 9.87E-04 |

**Table SI.4:** Primary kinetic data for the reaction of 1-ethyl-2-pyrrolidone (**S4**) with CumO• generated by 355 nm LFP in MeCN (**Figure SI.4**).

| t / s   | $\Delta A$ 1-ethyl-2-pyrrolidone ( <b>S4</b> ) |               |               |               |               |
|---------|------------------------------------------------|---------------|---------------|---------------|---------------|
|         | <b>0.044M</b>                                  | <b>0.109M</b> | <b>0.194M</b> | <b>0.278M</b> | <b>0.381M</b> |
| -1E-06  | 0.00109                                        | 0.00047       | -0.0005       | 0.00023       | -0.0013       |
| -1E-06  | 0.00089                                        | 0.00124       | 0.00017       | 0.00011       | -0.0021       |
| -9E-07  | 0.0011                                         | 0.00083       | 0.00056       | -0.0008       | -0.0029       |
| -9E-07  | 0.00147                                        | 0.00033       | -0.0007       | -0.0006       | -0.0021       |
| -9E-07  | 3.1E-05                                        | 0.00094       | 0.00015       | -0.0006       | -0.0016       |
| -8E-07  | 0.00048                                        | 0.00073       | 0.00012       | -0.0004       | -9E-05        |
| -8E-07  | 0.00046                                        | 0.00024       | 4.8E-05       | -0.0006       | -0.0019       |
| -8E-07  | 0.00068                                        | 0.00152       | 0.00015       | 0.00022       | -0.0011       |
| -7E-07  | 0.00095                                        | 0.0008        | -6E-05        | -0.0005       | -0.0021       |
| -7E-07  | 0.00125                                        | 0.00024       | 0.00033       | -0.0006       | -0.0021       |
| -7E-07  | 0.00081                                        | 0.00106       | 0.00066       | -0.0005       | -0.0013       |
| -6E-07  | 0.00141                                        | 0.00086       | 0.0003        | -0.0005       | -0.0018       |
| -6E-07  | 0.00143                                        | 0.00053       | -0.0002       | -0.0002       | -0.0022       |
| -6E-07  | 0.00051                                        | 0.00077       | -0.0007       | -0.0002       | -0.0024       |
| -5E-07  | 0.00089                                        | 0.0002        | -0.0006       | -0.0006       | -0.0014       |
| -5E-07  | 0.00046                                        | 0.00157       | -0.0006       | 0.00031       | -0.0025       |
| -5E-07  | 0.00064                                        | 0.00029       | 0.0005        | 0.00011       | -0.0018       |
| -4E-07  | 0.00075                                        | 0.00086       | -0.0005       | -0.0008       | -0.0017       |
| -4E-07  | 0.00171                                        | 0.00059       | 0.00016       | -0.0007       | -0.0018       |
| -4E-07  | 0.00092                                        | 0.00115       | 0.00024       | 0.00012       | -0.0019       |
| -4E-07  | 0.00025                                        | 0.0006        | 0.00017       | -0.0012       | -0.0021       |
| -3E-07  | 0.00084                                        | 0.00037       | -0.0007       | -0.0004       | -0.0019       |
| -3E-07  | 0.00044                                        | 0.0005        | -9E-05        | -3E-05        | -0.0019       |
| -3E-07  | 0.00072                                        | 0.00057       | -0.0002       | -0.0008       | -0.0018       |
| -2E-07  | 0.00075                                        | 5.4E-05       | 0.00021       | -0.0012       | -0.0009       |
| -2E-07  | 0.00019                                        | 0.00091       | -8E-05        | -0.0006       | -0.0016       |
| -2E-07  | 0.00014                                        | 0.00046       | -0.0005       | 0.00018       | -0.0019       |
| -1E-07  | 0.00045                                        | 0.00086       | -0.0006       | -0.0001       | -0.002        |
| -1E-07  | 0.00088                                        | 0.00101       | -0.0006       | -0.0003       | -0.0022       |
| -6E-08  | 5.4E-05                                        | 0.00044       | -1E-05        | -0.0007       | -0.0017       |
| -3E-08  | 0.00066                                        | 0.00093       | -0.0005       | -0.0002       | -0.0022       |
| -2E-10  | -0.0016                                        | -0.003        | -0.0028       | -0.0037       | -0.0058       |
| 3.2E-08 | -0.0125                                        | -0.0176       | -0.0163       | -0.0179       | -0.0199       |
| 6.4E-08 | 0.01063                                        | 0.00757       | 0.00292       | -0.0007       | -0.006        |
| 9.6E-08 | 0.01448                                        | 0.01425       | 0.01302       | 0.01235       | 0.00909       |
| 1.3E-07 | 0.01545                                        | 0.01503       | 0.01293       | 0.01229       | 0.00979       |
| 1.6E-07 | 0.0141                                         | 0.01333       | 0.01291       | 0.01242       | 0.00893       |
| 1.9E-07 | 0.01402                                        | 0.0141        | 0.01214       | 0.01098       | 0.00882       |
| 2.2E-07 | 0.01476                                        | 0.0134        | 0.01139       | 0.01089       | 0.00828       |
| 2.6E-07 | 0.01431                                        | 0.0131        | 0.01055       | 0.01036       | 0.00695       |
| 2.9E-07 | 0.01292                                        | 0.01249       | 0.0108        | 0.00971       | 0.00669       |
| 3.2E-07 | 0.01293                                        | 0.01188       | 0.01053       | 0.00938       | 0.00569       |
| 3.5E-07 | 0.01234                                        | 0.0105        | 0.00943       | 0.00861       | 0.00557       |
| 3.8E-07 | 0.01154                                        | 0.01115       | 0.009         | 0.00831       | 0.00448       |
| 4.2E-07 | 0.0124                                         | 0.01071       | 0.00828       | 0.00774       | 0.00436       |
| 4.5E-07 | 0.01102                                        | 0.00981       | 0.00775       | 0.00704       | 0.00367       |
| 4.8E-07 | 0.011                                          | 0.00937       | 0.00717       | 0.00709       | 0.00389       |
| 5.1E-07 | 0.01074                                        | 0.00952       | 0.00757       | 0.00619       | 0.00298       |
| 5.4E-07 | 0.01053                                        | 0.00901       | 0.00784       | 0.00538       | 0.00319       |

|         |         |         |         |         |         |
|---------|---------|---------|---------|---------|---------|
| 5.8E-07 | 0.00996 | 0.00947 | 0.00671 | 0.00508 | 0.00309 |
| 6.1E-07 | 0.01016 | 0.00931 | 0.00647 | 0.00522 | 0.00199 |
| 6.4E-07 | 0.00986 | 0.00801 | 0.00602 | 0.0051  | 0.00241 |
| 6.7E-07 | 0.00983 | 0.00738 | 0.00623 | 0.00426 | 0.00169 |
| 7E-07   | 0.0093  | 0.00759 | 0.00511 | 0.00462 | 0.00146 |
| 7.4E-07 | 0.00899 | 0.00696 | 0.005   | 0.00519 | 0.00144 |
| 7.7E-07 | 0.00827 | 0.00691 | 0.00493 | 0.00355 | 0.00053 |
| 8E-07   | 0.00868 | 0.00698 | 0.0047  | 0.00331 | 0.00084 |
| 8.3E-07 | 0.00774 | 0.00693 | 0.00499 | 0.00304 | 0.0007  |
| 8.6E-07 | 0.00712 | 0.00639 | 0.00406 | 0.00302 | 0.00051 |
| 9E-07   | 0.00802 | 0.00631 | 0.00445 | 0.00221 | -0.0002 |
| 9.3E-07 | 0.0078  | 0.00608 | 0.00345 | 0.00211 | 0.00021 |
| 9.6E-07 | 0.00834 | 0.00547 | 0.00442 | 0.00326 | 0.00011 |
| 9.9E-07 | 0.0064  | 0.0052  | 0.00337 | 0.00202 | -2E-05  |
| 1E-06   | 0.00685 | 0.00568 | 0.00336 | 0.00174 | -0.0004 |
| 1.1E-06 | 0.00693 | 0.00499 | 0.00315 | 0.00166 | -0.0006 |
| 1.1E-06 | 0.00613 | 0.00472 | 0.00315 | 0.0016  | -9E-05  |
| 1.1E-06 | 0.00633 | 0.0048  | 0.00297 | 0.00215 | 0.00021 |
| 1.2E-06 | 0.0058  | 0.00497 | 0.00285 | 0.00134 | -0.001  |
| 1.2E-06 | 0.00622 | 0.0046  | 0.0028  | 0.00177 | -0.0009 |
| 1.2E-06 | 0.00584 | 0.00453 | 0.0026  | 0.00147 | -0.0008 |
| 1.2E-06 | 0.00563 | 0.00405 | 0.00234 | 0.00194 | -0.0007 |
| 1.3E-06 | 0.00555 | 0.00412 | 0.00206 | 0.00169 | -0.0007 |
| 1.3E-06 | 0.00535 | 0.00439 | 0.00164 | 0.00123 | -0.0007 |
| 1.3E-06 | 0.00509 | 0.00433 | 0.00209 | 0.00169 | -0.0013 |
| 1.4E-06 | 0.00512 | 0.00352 | 0.00169 | 0.00018 | -0.0009 |
| 1.4E-06 | 0.0062  | 0.0034  | 0.00126 | 0.00142 | -0.0007 |
| 1.4E-06 | 0.00538 | 0.00439 | 0.00139 | 0.00145 | -0.0004 |
| 1.5E-06 | 0.00476 | 0.00409 | 0.00209 | 0.0013  | -0.0007 |
| 1.5E-06 | 0.00457 | 0.00317 | 0.00223 | 0.0013  | -0.0012 |
| 1.5E-06 | 0.0052  | 0.00356 | 0.00161 | 0.00085 | -0.0015 |
| 1.6E-06 | 0.00473 | 0.00374 | 0.00189 | 0.00073 | -0.0014 |
| 1.6E-06 | 0.00446 | 0.0035  | 0.00168 | 0.00077 | -0.0008 |
| 1.6E-06 | 0.00429 | 0.00396 | 0.00232 | 0.00142 | -0.0014 |
| 1.7E-06 | 0.00449 | 0.00333 | 0.00155 | 0.00057 | -0.0005 |
| 1.7E-06 | 0.00413 | 0.00332 | 0.00116 | 0.00115 | -0.0007 |
| 1.7E-06 | 0.00479 | 0.00327 | 0.0015  | 0.00034 | -0.0009 |
| 1.8E-06 | 0.00516 | 0.0024  | 0.00063 | 0.00023 | -0.0012 |
| 1.8E-06 | 0.00382 | 0.00291 | 0.00173 | 0.00078 | -0.0014 |
| 1.8E-06 | 0.0036  | 0.00259 | 0.00139 | 0.00081 | -0.0017 |
| 1.9E-06 | 0.00369 | 0.00243 | 0.00074 | 0.00094 | -0.0011 |
| 1.9E-06 | 0.0036  | 0.00236 | 0.00078 | 0.00033 | -0.0013 |
| 1.9E-06 | 0.00402 | 0.00211 | 0.00095 | -0.0002 | -0.0011 |
| 2E-06   | 0.00385 | 0.00168 | 0.00135 | 0.00042 | -0.0013 |
| 2E-06   | 0.00383 | 0.00247 | 0.00079 | 0.00098 | -0.0011 |
| 2E-06   | 0.00357 | 0.00263 | 0.00156 | 0.00073 | -0.0012 |
| 2E-06   | 0.00367 | 0.00121 | 0.00045 | 0.00018 | -0.0017 |
| 2.1E-06 | 0.00288 | 0.00258 | 0.00068 | 0.00068 | -0.0014 |
| 2.1E-06 | 0.00299 | 0.0024  | 0.00112 | 0.00047 | -0.001  |
| 2.1E-06 | 0.00312 | 0.00268 | 0.0009  | -7E-05  | -0.0008 |
| 2.2E-06 | 0.00302 | 0.00203 | 0.0008  | 0.00036 | -0.0012 |
| 2.2E-06 | 0.00291 | 0.00173 | 0.0015  | 0.00078 | -0.0006 |
| 2.2E-06 | 0.00276 | 0.00214 | 0.00104 | 0.00047 | -0.0007 |
| 2.3E-06 | 0.0031  | 0.00223 | 0.0012  | 0.00061 | -0.0008 |

|         |         |         |         |         |         |
|---------|---------|---------|---------|---------|---------|
| 2.3E-06 | 0.00244 | 0.00196 | 0.00083 | 0.0007  | -0.001  |
| 2.3E-06 | 0.00264 | 0.00262 | 0.00098 | 0.00031 | -0.0009 |
| 2.4E-06 | 0.00189 | 0.00222 | 0.00071 | 0.00032 | -0.0012 |
| 2.4E-06 | 0.00248 | 0.00233 | 0.00097 | 0.00079 | -0.0014 |
| 2.4E-06 | 0.00205 | 0.00155 | 0.0011  | 0.00072 | -0.0014 |
| 2.5E-06 | 0.00232 | 0.00208 | 0.00097 | 0.00096 | -0.0015 |
| 2.5E-06 | 0.00229 | 0.00136 | 0.00093 | -5E-05  | -0.0017 |
| 2.5E-06 | 0.00204 | 0.00188 | 0.0011  | 0.00099 | -0.0012 |
| 2.6E-06 | 0.00208 | 0.00239 | 0.00131 | 7.6E-05 | -0.0016 |
| 2.6E-06 | 0.00256 | 0.00211 | 0.00076 | 0.00064 | -0.0011 |
| 2.6E-06 | 0.0018  | 0.00121 | 0.00101 | 0.00074 | -0.0011 |
| 2.7E-06 | 0.00192 | 0.00175 | 0.00085 | 0.00068 | -0.0015 |
| 2.7E-06 | 0.00203 | 0.00261 | 0.0004  | 0.001   | -0.0012 |
| 2.7E-06 | 0.0024  | 0.00176 | 0.00095 | 0.00022 | -0.0014 |
| 2.8E-06 | 0.00127 | 0.00057 | 0.00031 | -0.0005 | -0.0013 |
| 2.8E-06 | 0.00159 | 0.00226 | 0.00076 | 0.00036 | -0.0012 |
| 2.8E-06 | 0.00227 | 0.00182 | 3.3E-05 | -0.0004 | -0.0019 |
| 2.8E-06 | 0.00268 | 0.00148 | 0.00084 | 0.00142 | -0.0016 |
| 2.9E-06 | 0.00156 | 0.00188 | 0.00072 | 1.3E-05 | -0.0013 |
| 2.9E-06 | 0.00263 | 0.00154 | 0.0013  | 0.00066 | -0.0012 |
| 2.9E-06 | 0.00175 | 0.00158 | 0.001   | 0.00032 | -0.0011 |
| 3E-06   | 0.00176 | 0.00212 | 0.00125 | 0.00049 | -0.0016 |
| 3E-06   | 0.0028  | 0.00167 | 0.00049 | -8E-06  | -0.0024 |
| 3E-06   | 0.0019  | 0.00137 | 0.00036 | -0.0002 | -0.002  |
| 3.1E-06 | 0.00171 | 0.00151 | 0.00081 | -0.0006 | -0.0016 |
| 3.1E-06 | 0.0019  | 0.00217 | 0.00048 | 0.0008  | -0.0017 |
| 3.1E-06 | 0.00141 | 0.00221 | 0.00057 | 0.00041 | -0.0009 |
| 3.2E-06 | 0.00237 | 0.00213 | 0.00085 | 0.00034 | -0.0011 |
| 3.2E-06 | 0.00203 | 0.00146 | 0.00062 | 0.00043 | -0.0018 |
| 3.2E-06 | 0.00209 | 0.00131 | 0.00105 | 0.00097 | -0.0016 |
| 3.3E-06 | 0.00203 | 0.00122 | -0.0001 | 8.9E-05 | -0.001  |
| 3.3E-06 | 0.0016  | 0.00134 | 0.00123 | 0.00012 | -0.0012 |
| 3.3E-06 | 0.00161 | 0.00152 | 0.0003  | 0.00079 | -0.0018 |
| 3.4E-06 | 0.00163 | 0.00182 | 0.00069 | 0.00021 | -0.0005 |
| 3.4E-06 | 0.00208 | 0.00132 | 0.00129 | 0.00066 | -0.001  |
| 3.4E-06 | 0.00237 | 0.00151 | 0.00045 | 0.0003  | -0.0013 |
| 3.5E-06 | 0.00208 | 0.00137 | 0.00082 | 0.0005  | -0.0021 |
| 3.5E-06 | 0.00209 | 0.00101 | -0.0004 | -0.0002 | -0.0021 |
| 3.5E-06 | 0.00189 | 0.00123 | 0.00037 | 0.00043 | -0.0014 |
| 3.6E-06 | 0.00247 | 0.0012  | 0.00076 | 0.00055 | -0.0015 |
| 3.6E-06 | 0.0021  | 0.00097 | 0.00091 | 0.00055 | -0.0017 |
| 3.6E-06 | 0.00137 | 0.00112 | 0.00076 | 4.9E-05 | -0.001  |
| 3.6E-06 | 0.00146 | 0.00124 | 0.00065 | 0.00028 | -0.002  |
| 3.7E-06 | 0.0016  | 0.00137 | 0.00058 | 0.00014 | -0.001  |
| 3.7E-06 | 0.00129 | 0.00141 | 0.00042 | 0.00056 | -0.0005 |
| 3.7E-06 | 0.00182 | 0.00138 | 0.0004  | 0.00078 | -0.0013 |
| 3.8E-06 | 0.00146 | 0.00048 | 0.0006  | 0.00042 | -0.0023 |
| 3.8E-06 | 0.00118 | 0.00106 | 0.00074 | 0.0003  | -0.0021 |
| 3.8E-06 | 0.00123 | 0.00143 | 0.00065 | -0.0003 | -0.0018 |
| 3.9E-06 | 0.00081 | 0.00187 | 0.00109 | 8.3E-05 | -0.0013 |
| 3.9E-06 | 0.00137 | 0.00119 | 0.00058 | -6E-05  | -0.0014 |
| 3.9E-06 | 0.00208 | 0.00118 | 0.0005  | 0.00067 | -0.0018 |
| 4E-06   | 0.00206 | 0.00151 | 0.00032 | 0.00068 | -0.0015 |
| 4E-06   | 0.00211 | 0.00159 | -0.0004 | 3.7E-05 | -0.0015 |

|         |         |         |         |         |         |
|---------|---------|---------|---------|---------|---------|
| 4E-06   | 0.0013  | 0.00146 | 0.0003  | 0.00026 | -0.0011 |
| 4.1E-06 | 0.0014  | 0.0011  | 0.00103 | 0.00053 | -0.0014 |
| 4.1E-06 | 0.00081 | 0.00106 | 0.00056 | -0.0003 | -0.0018 |
| 4.1E-06 | 0.00146 | 0.00083 | 0.00078 | 0.00056 | -0.0023 |
| 4.2E-06 | 0.00092 | 0.00116 | 0.00046 | 0.00046 | -0.0018 |
| 4.2E-06 | 0.00158 | 0.00146 | 0.00012 | 0.00091 | -0.0012 |
| 4.2E-06 | 0.00126 | 0.00147 | 0.00055 | 0.00159 | -0.0016 |
| 4.3E-06 | 0.00143 | 0.0013  | 0.00022 | 0.00037 | -0.0012 |
| 4.3E-06 | 0.00145 | 0.00118 | 0.00035 | -0.0002 | -0.0014 |
| 4.3E-06 | 0.00118 | 0.00144 | 0.00093 | 0.00045 | -0.001  |
| 4.4E-06 | 0.00137 | 0.00056 | 5.7E-05 | 0.00088 | -0.0018 |
| 4.4E-06 | 0.00165 | 0.00089 | 0.00072 | 0.00047 | -0.0014 |
| 4.4E-06 | 0.00074 | 0.00146 | 0.00043 | -2E-05  | -0.0014 |
| 4.4E-06 | 0.00071 | 0.00119 | 0.00056 | 0.00072 | -0.0017 |
| 4.5E-06 | 0.002   | 0.00108 | 0.00058 | 0.00041 | -0.0027 |
| 4.5E-06 | 0.0012  | 0.00169 | 2.5E-05 | 4.6E-05 | -0.0022 |
| 4.5E-06 | 0.00156 | 0.00119 | 0.00083 | -0.0003 | -0.0016 |
| 4.6E-06 | 0.00095 | 0.00096 | 0.00051 | 0.00057 | -0.0012 |
| 4.6E-06 | 0.00131 | 0.00175 | 0.00036 | -0.0002 | -0.0014 |
| 4.6E-06 | 0.0012  | 0.00115 | 0.00065 | 0.00052 | -0.0021 |
| 4.7E-06 | 0.00071 | 0.00085 | 0.00078 | 0.00022 | -0.002  |
| 4.7E-06 | 0.00129 | 0.00162 | 0.00033 | 0.00053 | -0.0017 |
| 4.7E-06 | 0.00072 | 0.00081 | 0.00075 | -0.0001 | -0.001  |
| 4.8E-06 | 0.00134 | 0.00118 | 0.00034 | 0.00056 | -0.0011 |
| 4.8E-06 | 0.00064 | 0.00102 | 0.00055 | 0.00053 | -0.0009 |
| 4.8E-06 | 0.00052 | 0.00079 | 0.0003  | 0.00036 | -0.0021 |
| 4.9E-06 | 0.00118 | 0.00064 | 0.0002  | 0.00052 | -0.0009 |
| 4.9E-06 | 0.00158 | 0.00134 | 0.00013 | -2E-05  | -0.0008 |
| 4.9E-06 | 0.00146 | 0.00082 | -6E-05  | -8E-06  | -0.0015 |
| 5E-06   | 0.00128 | 0.00164 | 0.00072 | 5.8E-05 | -0.002  |
| 5E-06   | 0.00067 | 0.00121 | 0.00076 | 0.0002  | -0.001  |
| 5E-06   | 0.00149 | 0.0012  | -3E-05  | 0.00073 | -0.0014 |
| 5.1E-06 | 0.0017  | 0.0012  | 0.00042 | 7E-05   | -0.0019 |
| 5.1E-06 | 0.00132 | 0.00145 | 0.00049 | -6E-06  | -0.0017 |
| 5.1E-06 | 0.00105 | 0.00067 | 0.00051 | 0.00038 | -0.0016 |
| 5.2E-06 | 0.00103 | 0.00042 | 0.00033 | 4E-05   | -0.0017 |
| 5.2E-06 | 0.00132 | 0.00122 | 0.00065 | 0.0007  | -0.0024 |
| 5.2E-06 | 0.00194 | 0.00101 | 7.6E-05 | 9E-05   | -0.0023 |
| 5.2E-06 | 0.00141 | 0.00088 | 0.00019 | -0.0002 | -0.0017 |
| 5.3E-06 | 0.00139 | 0.00069 | 8E-05   | -7E-05  | -0.0022 |
| 5.3E-06 | 0.00173 | 0.00112 | 0.00055 | -1E-04  | -0.0015 |
| 5.3E-06 | 0.0011  | 0.00104 | 0.00094 | 0.0008  | -0.0015 |
| 5.4E-06 | 0.00146 | 0.00128 | 0.00033 | 0.0007  | -0.0018 |
| 5.4E-06 | 0.00149 | 0.00036 | 0.00089 | 0.00018 | -0.0016 |
| 5.4E-06 | 0.00112 | 0.00129 | 0.00032 | -0.0002 | -0.0015 |
| 5.5E-06 | 0.00086 | 0.00192 | 0.00055 | 0.00017 | -0.0016 |
| 5.5E-06 | 0.0016  | 0.00161 | 0.00034 | 3.3E-05 | -0.0008 |
| 5.5E-06 | 0.00096 | 0.00113 | 7.1E-05 | 0.00024 | -0.0018 |
| 5.6E-06 | 0.00137 | 0.00118 | 0.00066 | 0.0007  | -0.0017 |
| 5.6E-06 | 0.00096 | 0.00087 | 0.00028 | 0.00057 | -0.0015 |
| 5.6E-06 | 0.00039 | 0.00093 | 0.00073 | -4E-05  | -0.0014 |
| 5.7E-06 | 0.0008  | 0.00078 | 0.00076 | 0.00014 | -0.0017 |
| 5.7E-06 | 0.00121 | 0.00115 | 0.00114 | 0.00064 | -0.0013 |
| 5.7E-06 | 0.00086 | 0.00139 | 0.00058 | 0.00026 | -0.0014 |

|         |         |         |         |         |         |
|---------|---------|---------|---------|---------|---------|
| 5.8E-06 | 0.00112 | 0.00095 | 0.00089 | -0.0003 | -0.0016 |
| 5.8E-06 | 0.00107 | 0.0013  | 0.00105 | 0.00028 | -0.0018 |
| 5.8E-06 | 0.00063 | 0.00095 | 0.0002  | 0.00058 | -0.0012 |
| 5.9E-06 | 0.00099 | 0.00135 | 0.00035 | 0.00039 | -0.0018 |
| 5.9E-06 | 0.00131 | 0.00115 | 0.00098 | 0.00037 | -0.0011 |
| 5.9E-06 | 0.0009  | 0.00104 | 0.00078 | 0.0004  | -0.002  |
| 6E-06   | 0.00151 | 0.00114 | 0.00046 | 0.00056 | -0.0014 |
| 6E-06   | 0.00086 | 0.00112 | 7E-05   | 0.00026 | -0.0026 |
| 6E-06   | 0.00228 | 0.00137 | 0.00062 | 0.00036 | -0.0022 |
| 6E-06   | 0.00098 | 0.00035 | 0.00078 | -4E-05  | -0.0015 |
| 6.1E-06 | 0.0005  | 0.00104 | 0.00053 | -0.0003 | -0.0017 |
| 6.1E-06 | 0.00099 | 0.00106 | 0.0004  | 0.00042 | -0.0016 |
| 6.1E-06 | 0.0015  | 0.00196 | 0.00011 | 0.00059 | -0.0019 |
| 6.2E-06 | 0.00086 | 0.00114 | 0.00019 | 0.00044 | -0.0017 |
| 6.2E-06 | 0.00164 | 0.00083 | 0.0003  | 0.00013 | -0.0021 |
| 6.2E-06 | 0.00076 | 0.00096 | 0.00056 | 0.00031 | -0.0015 |
| 6.3E-06 | 0.00137 | 0.00087 | -1E-05  | 0.00026 | -0.0013 |
| 6.3E-06 | 0.00075 | 0.00068 | 0.00035 | 0.00035 | -0.0012 |
| 6.3E-06 | 0.002   | 0.00127 | 8.8E-05 | 0.00079 | -0.0015 |
| 6.4E-06 | 0.00042 | 0.00149 | 0.00049 | -0.0004 | -0.0014 |
| 6.4E-06 | 0.00124 | 0.00125 | 7.2E-05 | 0.00045 | -0.0018 |
| 6.4E-06 | 0.001   | 0.00066 | 0.00042 | 9E-05   | -0.0009 |
| 6.5E-06 | 0.00058 | 0.00134 | 0.00039 | 0.00083 | -0.0019 |
| 6.5E-06 | 0.0013  | 0.00189 | 0.00058 | 0.00099 | -0.0012 |
| 6.5E-06 | 0.00111 | 0.00161 | 0.0011  | -7E-05  | -0.0014 |
| 6.6E-06 | 0.00093 | 0.00082 | 0.00084 | 0.00027 | -0.0014 |
| 6.6E-06 | 0.00075 | 0.00111 | 0.00069 | 0.00012 | -0.0007 |
| 6.6E-06 | 0.00074 | 0.00151 | 0.00091 | 0.00032 | -0.0018 |
| 6.7E-06 | 0.00111 | 0.00153 | 0.00126 | 0.00054 | -0.0016 |
| 6.7E-06 | 0.00089 | 0.00084 | 0.00069 | 0.00021 | -0.0015 |
| 6.7E-06 | 0.00092 | 0.00117 | 0.00016 | 0.00015 | -0.0012 |
| 6.8E-06 | 0.00147 | 0.00094 | 0.00045 | 5.4E-05 | -0.0007 |
| 6.8E-06 | 0.00119 | 0.00102 | 0.00025 | 0.00084 | -0.0012 |
| 6.8E-06 | 0.00134 | 0.00095 | 0.00107 | 0.00017 | -0.0017 |
| 6.8E-06 | 0.00164 | 0.00137 | 0.00098 | 0.00022 | -0.0016 |
| 6.9E-06 | 0.00092 | 0.00147 | 0.00031 | 0.00065 | -0.0012 |
| 6.9E-06 | 0.00093 | 0.00159 | 0.0003  | 0.00061 | -0.0017 |
| 6.9E-06 | 0.00098 | 0.00109 | 0.00111 | -0.0002 | -0.0005 |
| 7E-06   | 0.00075 | 0.0015  | 0.0004  | 0.00062 | -0.0007 |
| 7E-06   | 0.00121 | 0.00046 | 0.00054 | 0.00037 | -0.0011 |
| 7E-06   | 0.00146 | 0.00094 | 0.00078 | 0.00018 | -0.0012 |
| 7.1E-06 | 0.00133 | 0.00152 | 0.00055 | 0.00023 | -0.0009 |
| 7.1E-06 | 0.00179 | 0.00156 | 0.00045 | 0.00038 | -0.001  |
| 7.1E-06 | 0.00155 | 0.00118 | 0.00048 | -4E-05  | -0.0017 |
| 7.2E-06 | 0.00143 | 0.00095 | 0.0005  | 2.5E-05 | -0.001  |
| 7.2E-06 | 0.0008  | 0.00106 | -0.0004 | 0.00044 | -0.0017 |
| 7.2E-06 | 0.00176 | 0.00095 | -6E-05  | -0.0002 | -0.0018 |
| 7.3E-06 | 0.00135 | 0.00076 | 0.00057 | 0.00019 | -0.0012 |
| 7.3E-06 | 0.00143 | 0.00126 | 0.00062 | 0.00029 | -0.0018 |
| 7.3E-06 | 0.00045 | 0.00126 | 0.00044 | -2E-05  | -0.0013 |
| 7.4E-06 | 0.00082 | 0.00063 | 5E-05   | -0.0003 | -0.0009 |
| 7.4E-06 | 0.00083 | 0.00131 | 9.6E-05 | 0.00103 | -0.0017 |
| 7.4E-06 | 0.00133 | 0.00067 | 0.00079 | -0.0002 | -0.002  |
| 7.5E-06 | 0.00084 | 0.00102 | 0.00035 | 0.0003  | -0.0019 |



|         |         |         |         |         |         |
|---------|---------|---------|---------|---------|---------|
| 7.5E-06 | 0.00084 | 0.0006  | 7.9E-06 | 0.00048 | -0.0014 |
| 7.5E-06 | 0.00193 | 0.00063 | 0.00019 | 0.00052 | -0.0018 |
| 7.6E-06 | 0.00119 | 0.00115 | 0.00107 | -0.0006 | -0.0014 |
| 7.6E-06 | 0.00157 | 0.00098 | 0.00057 | 0.00051 | -0.0016 |
| 7.6E-06 | 0.00082 | 0.00045 | 0.00086 | -0.0003 | -0.001  |
| 7.6E-06 | 0.00128 | 0.00032 | 0.00068 | 0.00033 | -0.0022 |
| 7.7E-06 | 0.00084 | 0.0009  | 0.00078 | 7.3E-05 | -0.0027 |
| 7.7E-06 | 0.00134 | 0.0005  | 2.2E-05 | 0.00083 | -0.0021 |
| 7.7E-06 | 0.00087 | 0.00128 | 2.8E-05 | 0.00044 | -0.0019 |
| 7.8E-06 | 0.00151 | 0.00149 | -0.0001 | 0.0003  | -0.0014 |
| 7.8E-06 | 0.00082 | 0.00156 | 9.3E-05 | 6.9E-05 | -0.0013 |
| 7.8E-06 | 0.00102 | 0.00098 | 0.00019 | 0.00027 | -0.0014 |
| 7.9E-06 | 0.00121 | 0.00116 | 0.0009  | -9E-05  | -0.0013 |
| 7.9E-06 | 0.00066 | 0.00152 | 0.00019 | 0.0004  | -0.0018 |
| 7.9E-06 | 0.00114 | 0.00053 | 0.00095 | 0.00061 | -0.0019 |
| 8E-06   | 0.0012  | 0.00074 | 0.00028 | 0.00024 | -0.0015 |
| 8E-06   | 0.00098 | 0.00091 | 0.00032 | 0.00045 | -0.0009 |
| 8E-06   | 0.00112 | 0.00132 | 7.3E-05 | 0.0006  | -0.0014 |
| 8.1E-06 | 0.00055 | 0.00121 | -8E-06  | -0.0005 | -0.0026 |
| 8.1E-06 | 0.00073 | 0.00144 | -4E-05  | -4E-05  | -0.0014 |
| 8.1E-06 | 0.00126 | 0.00144 | 0.00036 | 0.00078 | -0.0009 |
| 8.2E-06 | 0.00133 | 0.00188 | 0.00046 | 0.00061 | -0.0015 |
| 8.2E-06 | 0.00105 | 0.00101 | -0.0002 | -9E-05  | -0.0011 |
| 8.2E-06 | 0.00119 | 0.00109 | 0.00103 | -0.0002 | -0.0027 |
| 8.3E-06 | 0.00123 | 0.00161 | 0.00075 | 0.00049 | -0.0014 |
| 8.3E-06 | 0.00152 | 0.00132 | 0.00066 | 0.00014 | -0.0013 |
| 8.3E-06 | 0.00134 | 0.00105 | 0.00018 | 0.00015 | -0.0018 |
| 8.4E-06 | 0.0009  | 0.00143 | 8.3E-05 | 0.00031 | -0.0022 |
| 8.4E-06 | 0.00207 | 0.00082 | 9.9E-05 | 0.00042 | -0.0011 |
| 8.4E-06 | 0.00185 | 0.00122 | 9.5E-05 | 0.00019 | -0.0019 |
| 8.4E-06 | 0.00112 | 0.00064 | 0.00072 | 9.6E-05 | -0.0018 |
| 8.5E-06 | 0.00045 | 0.00132 | 0.00069 | 0.00074 | -0.0021 |
| 8.5E-06 | 0.0011  | 0.00113 | -5E-05  | -4E-05  | -0.003  |
| 8.5E-06 | 0.00063 | 0.00094 | 5.3E-05 | 0.0003  | -0.0009 |
| 8.6E-06 | 0.00068 | 0.00039 | -0.0002 | -0.0002 | -0.002  |
| 8.6E-06 | 0.00113 | 0.001   | 0.00077 | 0.00067 | -0.0013 |
| 8.6E-06 | 0.00069 | 0.00111 | 0.00026 | 0.00014 | -0.0016 |
| 8.7E-06 | 0.00063 | 0.00077 | -0.0002 | 9.1E-05 | -0.0017 |
| 8.7E-06 | 0.00062 | 0.00128 | -0.0002 | 0.00032 | -0.0018 |
| 8.7E-06 | 0.00032 | 0.00113 | 0.00023 | -0.0002 | -0.001  |
| 8.8E-06 | 0.00115 | 0.00129 | 0.00014 | 0.0001  | -0.0015 |
| 8.8E-06 | 0.00095 | 0.00121 | 0.00019 | 0.00049 | -0.0008 |
| 8.8E-06 | 0.0011  | 0.00089 | 0.00033 | 0.00125 | -0.0023 |
| 8.9E-06 | 0.00094 | 0.00112 | 0.00053 | 0.00071 | -0.0019 |
| 8.9E-06 | 0.00113 | 0.00112 | 0.00018 | 0.00038 | -0.0009 |
| 8.9E-06 | 0.0008  | 0.00129 | -0.0001 | 0.00026 | -0.001  |
| 9E-06   | 0.00127 | 0.00111 | 0.00031 | 0.00034 | -0.0018 |
| 9E-06   | 0.00099 | 0.00117 | 1.2E-05 | 0.00033 | -0.0011 |
| 9E-06   | 0.00072 | 0.0012  | 9.5E-05 | -0.0006 | -0.0015 |
| 9.1E-06 | 0.00094 | 0.00096 | 0.00055 | -7E-05  | -0.0007 |
| 9.1E-06 | 0.00125 | 0.00164 | 0.00018 | -0.0003 | -0.0019 |
| 9.1E-06 | 0.00127 | 0.0014  | 0.00027 | -3E-05  | -0.0012 |
| 9.2E-06 | 0.00147 | 0.00054 | 0.0006  | -0.0007 | -0.0011 |
| 9.2E-06 | 0.00137 | 0.00028 | 0.00066 | -0.0004 | -0.0013 |

|         |         |         |         |         |         |
|---------|---------|---------|---------|---------|---------|
| 9.2E-06 | 0.00083 | 0.00144 | 0.00092 | -9E-05  | -0.0016 |
| 9.2E-06 | 0.00103 | 0.00081 | -0.0002 | 4.2E-06 | -0.0024 |
| 9.3E-06 | 0.00191 | 0.00094 | 0.00038 | -0.0001 | -0.002  |
| 9.3E-06 | 0.00108 | 0.00119 | 0.00074 | -0.0004 | -0.0018 |
| 9.3E-06 | 0.00172 | 0.0014  | -0.0003 | -0.0003 | -0.0013 |
| 9.4E-06 | 0.00089 | 0.00133 | 0.00045 | -0.0004 | -0.0018 |
| 9.4E-06 | 0.00197 | 0.0007  | 7E-05   | -6E-05  | -0.0016 |
| 9.4E-06 | 0.0017  | 0.00115 | 0.00062 | -0.0001 | -0.0019 |
| 9.5E-06 | 0.00143 | 0.00132 | 0.00071 | -0.0002 | -0.0012 |
| 9.5E-06 | 0.00141 | 0.00074 | 0.00017 | 0.00026 | -0.0016 |
| 9.5E-06 | 0.00125 | 0.00117 | -0.0002 | 0.0005  | -0.0004 |
| 9.6E-06 | 0.00173 | 0.00084 | 4.6E-05 | 0.00055 | -0.0012 |
| 9.6E-06 | 0.00122 | 0.00096 | -0.0001 | 0.00071 | -0.002  |
| 9.6E-06 | 0.00096 | 0.00132 | -1E-04  | 0.00114 | -0.0016 |
| 9.7E-06 | 0.00097 | 0.0015  | 0.00028 | 0.00046 | -0.001  |
| 9.7E-06 | 0.00204 | 0.00065 | 0.00015 | -0.0002 | -0.0019 |
| 9.7E-06 | 0.00122 | 0.00115 | 0.00036 | 0.0007  | -0.0016 |
| 9.8E-06 | 0.00134 | 0.00136 | 9.5E-05 | 0.00085 | -0.002  |
| 9.8E-06 | 0.00058 | 0.00066 | 0.0004  | 0.00051 | -0.0024 |
| 9.8E-06 | 0.00147 | 0.0015  | -6E-05  | -0.0002 | -0.002  |
| 9.9E-06 | 0.00098 | 0.00049 | 0.00051 | -0.0003 | -0.0015 |
| 9.9E-06 | 0.00112 | 0.00073 | 0.00085 | -0.0003 | -0.0016 |
| 9.9E-06 | 0.00121 | 0.00126 | -0.0001 | -3E-07  | -0.0013 |
| 1E-05   | 0.00099 | 0.00117 | 0.00034 | -0.0002 | -0.002  |
| 1E-05   | 0.00116 | 0.00027 | 0.00033 | 0.00034 | -0.0021 |
| 1E-05   | 0.00203 | 0.00113 | 0.0006  | -0.0002 | -0.0015 |
| 1E-05   | 0.0013  | 0.00154 | 0.00093 | -1E-04  | -0.0019 |
| 1E-05   | 0.00136 | 0.00096 | 0.00048 | 0.00049 | -0.0013 |
| 1E-05   | 0.0016  | 0.00103 | 0.00091 | -0.0001 | -0.0014 |
| 1E-05   | 0.00103 | 0.00025 | 0.0001  | 0.00026 | -0.0018 |
| 1E-05   | 0.00077 | 0.00121 | -6E-05  | 0.00012 | -0.0016 |
| 1E-05   | 0.00111 | 0.00114 | 0.00026 | 0.00037 | -0.0014 |
| 1E-05   | 0.00161 | 0.00115 | 0.00051 | -8E-05  | -0.0018 |
| 1E-05   | 0.00199 | 0.00102 | 0.00019 | -0.0006 | -0.0011 |
| 1E-05   | 0.001   | 0.00066 | 0.0001  | -0.0001 | -0.0017 |
| 1E-05   | 0.00178 | 0.00109 | 0.00028 | 0.00036 | -0.0022 |
| 1E-05   | 0.00102 | 0.00045 | 0.00059 | 0.00045 | -0.0016 |
| 1E-05   | 0.00112 | 0.00095 | 0.00091 | -0.0002 | -0.0014 |
| 1E-05   | 0.00077 | 0.00157 | 0.00064 | 0.0001  | -0.0027 |
| 1E-05   | 0.00193 | 0.00203 | 0.00015 | 0.00044 | -0.0013 |
| 1.1E-05 | 0.00121 | 0.00168 | 0.00045 | -0.0002 | -0.0015 |
| 1.1E-05 | 0.00066 | 0.00091 | 0.00015 | 6.1E-05 | -0.0011 |
| 1.1E-05 | 0.0022  | 0.00072 | 6.8E-05 | -0.0003 | -0.0011 |
| 1.1E-05 | 0.00126 | 0.00164 | 0.00015 | -0.0004 | -0.0022 |
| 1.1E-05 | 0.0005  | 0.00069 | 5.2E-06 | -0.0002 | -0.0025 |
| 1.1E-05 | 0.00124 | 0.00114 | 0.00088 | 0.00041 | -0.0016 |
| 1.1E-05 | 0.00141 | 0.00071 | 0.0004  | -0.0003 | -0.0012 |
| 1.1E-05 | 0.00155 | 0.00157 | 0.00034 | 0.00033 | -0.0014 |
| 1.1E-05 | 0.0013  | 0.0016  | -0.0003 | -0.0003 | -0.0017 |
| 1.1E-05 | 0.00165 | 0.00052 | 0.00077 | 0.00085 | -0.0019 |
| 1.1E-05 | 0.00123 | 0.00123 | 0.00094 | -0.0007 | -0.0011 |
| 1.1E-05 | 0.00191 | 0.0011  | -0.0002 | 0.00045 | -0.002  |
| 1.1E-05 | 0.00144 | 0.00137 | 0.00027 | -0.0001 | -0.0016 |
| 1.1E-05 | 0.00169 | 0.00092 | -3E-05  | -0.0002 | -0.0016 |

|         |         |         |         |         |         |
|---------|---------|---------|---------|---------|---------|
| 1.1E-05 | 0.00126 | 0.00094 | -0.0005 | -5E-05  | -0.0017 |
| 1.1E-05 | 0.00142 | 0.00045 | 9.3E-05 | -0.0008 | -0.0024 |
| 1.1E-05 | 0.00183 | 0.0009  | 0.00028 | 7.8E-05 | -0.0015 |
| 1.1E-05 | 0.00158 | 0.00145 | 0.00012 | -0.0002 | -0.0011 |
| 1.1E-05 | 0.00176 | 0.00033 | 0.00036 | 0.00053 | -0.0013 |
| 1.1E-05 | 0.00064 | -3E-05  | -0.0006 | 0.00118 | -0.0019 |
| 1.1E-05 | 0.00151 | 0.00075 | -0.0002 | -3E-05  | -0.0015 |
| 1.1E-05 | 0.00091 | 0.00128 | 0.00052 | -4E-05  | -0.0012 |
| 1.1E-05 | 0.00149 | 0.00099 | 0.00036 | 0.00014 | -0.0016 |
| 1.1E-05 | 0.00193 | 0.00048 | 0.00057 | 0.00047 | -0.0017 |
| 1.1E-05 | 0.00139 | 0.00105 | 0.00098 | 0.00021 | -0.0019 |
| 1.1E-05 | 0.00193 | 0.00084 | 0.00009 | -0.0004 | -0.0023 |
| 1.1E-05 | 0.00089 | 0.00127 | 0.00022 | 0.00026 | -0.0016 |
| 1.1E-05 | 0.00177 | 0.00019 | 0.0006  | 0.00076 | -0.0016 |
| 1.1E-05 | 0.00166 | 0.00191 | 0.00108 | -0.0004 | -0.0015 |
| 1.1E-05 | 0.00109 | 0.00125 | 0.00075 | 0.00048 | -0.0016 |
| 1.1E-05 | 0.00117 | 0.00103 | -3E-05  | 0.00081 | -0.0021 |
| 1.1E-05 | 0.00079 | 0.00148 | 0.00037 | -0.0004 | -0.0017 |
| 1.2E-05 | 0.00189 | 0.0014  | 0.00056 | 4.8E-05 | -0.0017 |
| 1.2E-05 | 0.00156 | 0.00112 | 8E-05   | 0.00043 | -0.0012 |
| 1.2E-05 | 0.00176 | 0.00139 | 0.00016 | -0.0004 | -0.0017 |
| 1.2E-05 | 0.00121 | 0.0005  | -0.0005 | -7E-06  | -0.0018 |
| 1.2E-05 | 0.00122 | 0.00145 | -8E-05  | 0.00025 | -0.0018 |
| 1.2E-05 | 0.00119 | 0.00114 | 0.00028 | -0.0003 | -0.0019 |
| 1.2E-05 | 0.00163 | 0.00185 | 0.00024 | 0.00059 | -0.0018 |
| 1.2E-05 | 0.00142 | 0.00127 | -0.0006 | -0.0004 | -0.0021 |
| 1.2E-05 | 0.00196 | 0.00131 | -0.0005 | 0.0002  | -0.0014 |
| 1.2E-05 | 0.00154 | 0.00049 | -3E-05  | -0.0002 | -0.0016 |
| 1.2E-05 | 0.0016  | 0.00051 | 0.00103 | 0.00016 | -0.0012 |
| 1.2E-05 | 0.0019  | 0.00022 | 0.00036 | -0.0006 | -0.0017 |
| 1.2E-05 | 0.00178 | 0.00124 | 0.00046 | -0.0003 | -0.0019 |
| 1.2E-05 | 0.00086 | 0.00223 | 0.00035 | -0.0003 | -0.0016 |
| 1.2E-05 | 0.00198 | 0.00154 | 0.00075 | -6E-05  | -0.0019 |
| 1.2E-05 | 0.00097 | 0.00069 | 0.00072 | -5E-05  | -0.0014 |
| 1.2E-05 | 0.00079 | 0.00065 | 7.8E-05 | 0.00027 | -0.0023 |
| 1.2E-05 | 0.0016  | 0.0014  | 0.00105 | -0.0001 | -0.0011 |
| 1.2E-05 | 0.00141 | 0.00077 | 0.00064 | 0.00023 | -0.0019 |
| 1.2E-05 | 0.00148 | 0.00078 | 0.0006  | 0.00036 | -0.0017 |
| 1.2E-05 | 0.00128 | 0.00056 | 0.00081 | -0.0003 | -0.0014 |
| 1.2E-05 | 0.00206 | 0.00161 | 0.00045 | 0.00048 | -0.0016 |
| 1.2E-05 | 0.00145 | 0.00172 | 0.00114 | -0.0002 | -0.0016 |
| 1.2E-05 | 0.00139 | 0.0006  | 0.00035 | 0.0001  | -0.0027 |
| 1.2E-05 | 0.00115 | 0.00059 | 0.00042 | 0.0005  | -0.0015 |
| 1.2E-05 | 0.00105 | -6E-05  | 0.00077 | 0.00043 | -0.001  |
| 1.2E-05 | 0.00163 | 0.0005  | 0.0004  | 0.00076 | -0.0019 |
| 1.2E-05 | 0.00145 | 0.00086 | 0.00056 | 0.00066 | -0.0019 |
| 1.2E-05 | 0.00118 | 0.00116 | -0.0004 | 0.0002  | -0.0012 |
| 1.2E-05 | 0.002   | 0.00122 | -0.0002 | 0.00036 | -0.0016 |
| 1.2E-05 | 0.00129 | 0.00114 | 0.00099 | 0.00059 | -0.0018 |
| 1.3E-05 | 0.00174 | 0.00189 | 0.00067 | 0.00074 | -0.0019 |
| 1.3E-05 | 0.00124 | 0.00083 | 0.00017 | -0.0004 | -0.0016 |
| 1.3E-05 | 0.00118 | 0.00088 | 0.00074 | 0.00027 | -0.0024 |
| 1.3E-05 | 0.0014  | 0.00096 | 0.00081 | 0.00092 | -0.0017 |
| 1.3E-05 | 0.00119 | 0.00181 | 0.00078 | 0.00038 | -0.0008 |

|         |         |         |         |         |         |
|---------|---------|---------|---------|---------|---------|
| 1.3E-05 | 0.00186 | 0.00098 | 0.00045 | 0.00013 | -0.0013 |
| 1.3E-05 | 0.00106 | 0.00123 | 3.9E-05 | 0.00032 | -0.0016 |
| 1.3E-05 | 0.00099 | 0.0013  | 0.00028 | 0.0004  | -0.0019 |
| 1.3E-05 | 0.00138 | 0.00121 | 0.00037 | -0.0002 | -0.0016 |
| 1.3E-05 | 0.00162 | 0.00102 | 0.0005  | 0.00012 | -0.0016 |
| 1.3E-05 | 0.00186 | 0.00083 | 0.00041 | 0.00035 | -0.0018 |
| 1.3E-05 | 0.00199 | 0.0018  | 3.7E-05 | 0.00012 | -0.0014 |
| 1.3E-05 | 0.00141 | 0.00114 | 0.00088 | 6.8E-05 | -0.0014 |
| 1.3E-05 | 0.00148 | 0.00074 | 0.00041 | 4.4E-05 | -0.0015 |
| 1.3E-05 | 0.00134 | 0.00085 | 0.0004  | -0.0003 | -0.0015 |
| 1.3E-05 | 0.00101 | 0.00103 | 0.00094 | -0.0005 | -0.0017 |
| 1.3E-05 | 0.00165 | 0.0007  | 0.00018 | 1E-05   | -0.0013 |
| 1.3E-05 | 0.00172 | 0.00091 | -0.0003 | 1E-05   | -0.0012 |
| 1.3E-05 | 0.0014  | 0.00134 | 0.00029 | 7.9E-05 | -0.0016 |
| 1.3E-05 | 0.00181 | 0.00058 | 0.00059 | 0.00036 | -0.0019 |
| 1.3E-05 | 0.0016  | 0.00138 | 0.00091 | 0.00012 | -0.0011 |
| 1.3E-05 | 0.00253 | 0.00082 | 0.00034 | 0.00014 | -0.0019 |
| 1.3E-05 | 0.00173 | 0.00049 | -0.0007 | -0.0004 | -0.0019 |
| 1.3E-05 | 0.00139 | 0.00057 | 0.00039 | 3.6E-05 | -0.0011 |
| 1.3E-05 | 0.00155 | 0.00015 | 0.00077 | 0.00035 | -0.0017 |
| 1.3E-05 | 0.00096 | 0.00079 | 0.00082 | -0.0002 | -0.0018 |
| 1.3E-05 | 0.00103 | 0.00068 | 0.00042 | 9.9E-05 | -0.0017 |
| 1.3E-05 | 0.00135 | 0.00085 | 0.0002  | 8.2E-05 | -0.002  |
| 1.3E-05 | 0.00212 | 0.00038 | 0.00048 | -0.0007 | -0.001  |
| 1.3E-05 | 0.00137 | 0.00113 | 0.00087 | -0.0012 | -0.001  |
| 1.3E-05 | 0.00148 | 0.00033 | 0.00033 | -4E-05  | -0.0015 |
| 1.4E-05 | 0.00099 | 0.00045 | -0.0005 | -0.0001 | -0.0012 |
| 1.4E-05 | 0.00209 | 0.00063 | 0.00059 | 3.1E-05 | -0.0012 |
| 1.4E-05 | 0.00166 | 0.00061 | -0.0006 | 0.00025 | -0.0016 |
| 1.4E-05 | 0.00163 | 0.00058 | 0.00058 | 8.5E-05 | -0.0013 |
| 1.4E-05 | 0.00095 | 0.00127 | 0.00045 | 0.00017 | -0.0019 |
| 1.4E-05 | 0.00155 | 0.00056 | 8.4E-05 | -0.0004 | -0.0015 |
| 1.4E-05 | 0.00089 | 0.00024 | 0.00053 | -0.0008 | -0.0014 |
| 1.4E-05 | 0.00099 | 0.00093 | 0.00011 | -0.0002 | -0.0018 |
| 1.4E-05 | 0.00123 | -4E-05  | 0.00052 | 8.7E-06 | -0.0014 |
| 1.4E-05 | 0.00169 | 0.00112 | 0.00022 | -0.0004 | -0.0011 |
| 1.4E-05 | 0.00209 | 0.00085 | 0.00015 | -3E-05  | -0.0012 |
| 1.4E-05 | 0.00156 | 0.00157 | 0.00064 | -0.0001 | -0.0015 |
| 1.4E-05 | 0.0005  | 0.00098 | 0.00021 | 0.00073 | -0.0016 |
| 1.4E-05 | 0.00165 | 0.0008  | 0.00112 | -0.0003 | -0.0016 |
| 1.4E-05 | 0.00106 | 0.0014  | 0.0012  | -0.0006 | -0.002  |
| 1.4E-05 | 0.00166 | 0.00088 | 0.00048 | -0.0004 | -0.0013 |
| 1.4E-05 | 0.00115 | 0.00049 | 0.00078 | 0.00046 | -0.002  |
| 1.4E-05 | 0.00156 | 0.00063 | 0.00147 | 0.00031 | -0.0017 |
| 1.4E-05 | 0.00152 | 0.001   | 0.00012 | -0.0002 | -0.0015 |
| 1.4E-05 | 0.00057 | 0.00057 | 0.00081 | -2E-05  | -0.0009 |
| 1.4E-05 | 0.00083 | 0.00148 | 0.00068 | 0.00015 | -0.0019 |
| 1.4E-05 | 0.00174 | 0.00069 | 0.001   | -0.0002 | -0.0014 |
| 1.4E-05 | 0.00131 | 0.00052 | -0.0003 | -0.0001 | -0.0012 |
| 1.4E-05 | 0.00129 | 0.00056 | 0.00063 | 0.00013 | -0.001  |
| 1.4E-05 | 0.00066 | 0.00078 | 0.00061 | 0.00031 | -0.0011 |
| 1.4E-05 | 0.00168 | 0.00117 | 0.00076 | 0.00021 | -0.0016 |
| 1.4E-05 | 0.00076 | 0.00096 | 0.00036 | 0.00018 | -0.0018 |
| 1.4E-05 | 0.00118 | 0.00133 | 0.00099 | 0.00053 | -0.0014 |

|         |         |         |         |         |         |
|---------|---------|---------|---------|---------|---------|
| 1.4E-05 | 0.00088 | 0.00101 | 0.00155 | -0.0002 | -0.0017 |
| 1.4E-05 | 0.00142 | 0.00027 | 0.00074 | -0.0002 | -0.0017 |
| 1.4E-05 | 0.0013  | 0.00075 | 0.00018 | -0.0005 | -0.0013 |
| 1.5E-05 | 0.00095 | 0.0016  | 0.00051 | 4.8E-05 | -0.0021 |
| 1.5E-05 | 0.00095 | 0.00071 | 0.00013 | 7.4E-05 | -0.0015 |
| 1.5E-05 | 0.00098 | 0.00072 | -0.0007 | 3.6E-05 | -0.0007 |
| 1.5E-05 | 0.00108 | 0.00065 | 0.00067 | -0.0001 | -0.0017 |
| 1.5E-05 | 0.00185 | 0.00127 | 0.00046 | 0.00075 | -0.0026 |
| 1.5E-05 | 0.00128 | 0.00113 | 0.00079 | -1E-05  | -0.0017 |
| 1.5E-05 | 0.00128 | 0.00104 | -0.0003 | 0.00054 | -0.002  |
| 1.5E-05 | 0.00118 | 0.00077 | 0.00036 | -2E-05  | -0.0025 |
| 1.5E-05 | 0.00138 | 0.001   | 0.00053 | 0.00078 | -0.0019 |
| 1.5E-05 | 0.00208 | 0.00122 | 0.00031 | -0.0004 | -0.0012 |
| 1.5E-05 | 0.00095 | 0.00116 | 0.00023 | 0.00024 | -0.0015 |
| 1.5E-05 | 0.00141 | 0.00069 | 0.00061 | -0.0003 | -0.0023 |
| 1.5E-05 | 0.00108 | 0.00053 | 0.00098 | 0.00054 | -0.0018 |
| 1.5E-05 | 0.00098 | 0.00092 | 0.00046 | 0.00015 | -0.0017 |
| 1.5E-05 | 0.00146 | 0.00107 | 0.00068 | 0.00024 | -0.0013 |
| 1.5E-05 | 0.00163 | 0.00074 | -5E-05  | 0.00028 | -0.0015 |

**Table SI.5:** Primary kinetic data for the reaction of 1-benzyl-2-pyrrolidone (**S5**) with CumO• generated by 355 nm LFP in MeCN (**Figure SI.5**).

| t / s   | $\Delta A$ 1-benzyl-2-pyrrolidone ( <b>S5</b> ) |               |               |               |               |
|---------|-------------------------------------------------|---------------|---------------|---------------|---------------|
|         | <b>0.0771M</b>                                  | <b>0.152M</b> | <b>0.240M</b> | <b>0.381M</b> | <b>0.568M</b> |
| -1E-06  | -8E-05                                          | 9.4E-05       | -0.0003       | -0.0004       | 0.00028       |
| -1E-06  | 4.5E-05                                         | 4E-05         | -0.0007       | -0.0002       | 0.0005        |
| -9E-07  | -0.0001                                         | -0.0001       | -0.0009       | -8E-05        | 0.0005        |
| -9E-07  | 0.00047                                         | -0.0006       | -0.0009       | -0.001        | 0.00092       |
| -9E-07  | 0.00021                                         | 6.9E-05       | -0.0004       | -0.0002       | 0.00095       |
| -8E-07  | -0.0007                                         | -0.0005       | -0.0009       | -4E-05        | 0.0008        |
| -8E-07  | 3.6E-05                                         | 0.00021       | -0.001        | -0.0012       | 0.00052       |
| -8E-07  | -0.0004                                         | 0.00015       | -0.001        | -0.0012       | 0.00062       |
| -7E-07  | 1.8E-05                                         | -0.0005       | 2.2E-06       | -0.0006       | 0.00091       |
| -7E-07  | -0.0003                                         | 0.00011       | -0.0013       | -0.0006       | 5.7E-05       |
| -7E-07  | -0.0001                                         | -0.0009       | -0.0003       | 0.00028       | 0.00069       |
| -6E-07  | -4E-05                                          | 7.9E-05       | -0.0005       | 0.00014       | 0.00094       |
| -6E-07  | -0.0004                                         | -9E-05        | -0.0011       | -0.0003       | 0.00064       |
| -6E-07  | -0.0003                                         | -0.0003       | -0.0007       | -0.001        | 0.00081       |
| -5E-07  | -0.0002                                         | -0.0005       | -0.0007       | -0.0008       | 0.00102       |
| -5E-07  | -0.0004                                         | -5E-05        | 0.00054       | -0.0001       | 0.00131       |
| -5E-07  | -0.0002                                         | -0.0001       | 6.3E-05       | 0.00011       | 0.00134       |
| -4E-07  | 0.00017                                         | 0.00039       | 0.0004        | 0.00036       | 0.00146       |
| -4E-07  | -0.0001                                         | -8E-05        | -0.0012       | 8.7E-05       | -0.0004       |
| -4E-07  | 0.00022                                         | -0.0001       | 0.00016       | -0.0005       | -0.0002       |
| -4E-07  | -1E-04                                          | -0.0003       | -0.001        | -0.0006       | 0.00052       |
| -3E-07  | -7E-05                                          | 0.00022       | -0.0005       | -0.0004       | 0.00074       |
| -3E-07  | -0.0001                                         | -0.0002       | -0.001        | -0.0007       | 0.00051       |
| -3E-07  | 0.0005                                          | 7.1E-05       | -0.0008       | -0.0011       | 0.00147       |
| -2E-07  | 3.2E-05                                         | -9E-05        | -0.0002       | -0.0008       | 0.0003        |
| -2E-07  | 1.6E-05                                         | -0.0001       | -0.0004       | -1E-04        | 0.00107       |
| -2E-07  | -0.0007                                         | 0.00024       | -0.001        | -0.0001       | 0.00109       |
| -1E-07  | -1E-04                                          | -0.0004       | -0.0002       | -0.0007       | 0.00107       |
| -1E-07  | 0.00018                                         | 0.00031       | 9.7E-05       | -0.0007       | -0.0003       |
| -6E-08  | -0.0005                                         | 0.00012       | -0.0004       | -0.0008       | 0.00129       |
| -3E-08  | 6.2E-05                                         | -0.0002       | -0.0005       | -0.0008       | 0.00102       |
| -4E-10  | -0.0033                                         | -0.0024       | -0.005        | -0.004        | -0.0025       |
| 3.2E-08 | -0.0128                                         | -0.0155       | -0.0212       | -0.0166       | -0.0162       |
| 6.4E-08 | 0.01248                                         | 0.00763       | 0.00243       | -0.0034       | -0.0087       |
| 9.6E-08 | 0.01841                                         | 0.01836       | 0.01599       | 0.01467       | 0.01318       |
| 1.3E-07 | 0.01786                                         | 0.0178        | 0.01725       | 0.0156        | 0.01446       |
| 1.6E-07 | 0.01666                                         | 0.01725       | 0.01535       | 0.0145        | 0.01449       |
| 1.9E-07 | 0.01652                                         | 0.01595       | 0.01618       | 0.01468       | 0.0138        |
| 2.2E-07 | 0.01624                                         | 0.01547       | 0.01541       | 0.01454       | 0.01372       |
| 2.6E-07 | 0.01636                                         | 0.016         | 0.01437       | 0.01294       | 0.01271       |
| 2.9E-07 | 0.01613                                         | 0.0145        | 0.01377       | 0.01251       | 0.01137       |
| 3.2E-07 | 0.01488                                         | 0.01438       | 0.0138        | 0.01181       | 0.01057       |
| 3.5E-07 | 0.01384                                         | 0.01456       | 0.01351       | 0.01174       | 0.01084       |
| 3.8E-07 | 0.01378                                         | 0.01316       | 0.01302       | 0.01098       | 0.0104        |
| 4.2E-07 | 0.0129                                          | 0.01248       | 0.01194       | 0.01035       | 0.0095        |
| 4.5E-07 | 0.01287                                         | 0.01258       | 0.01048       | 0.00958       | 0.00931       |
| 4.8E-07 | 0.01292                                         | 0.01182       | 0.01064       | 0.00978       | 0.0097        |
| 5.1E-07 | 0.01209                                         | 0.01112       | 0.01043       | 0.00891       | 0.00912       |
| 5.4E-07 | 0.01206                                         | 0.0105        | 0.01017       | 0.00918       | 0.00824       |

|         |         |         |         |         |         |
|---------|---------|---------|---------|---------|---------|
| 5.8E-07 | 0.01142 | 0.01023 | 0.00991 | 0.00829 | 0.0077  |
| 6.1E-07 | 0.01077 | 0.00988 | 0.00938 | 0.00767 | 0.00694 |
| 6.4E-07 | 0.01088 | 0.00965 | 0.00904 | 0.00691 | 0.0074  |
| 6.7E-07 | 0.01049 | 0.00974 | 0.00883 | 0.00726 | 0.00682 |
| 7E-07   | 0.01011 | 0.00935 | 0.00798 | 0.00665 | 0.00653 |
| 7.4E-07 | 0.00966 | 0.00909 | 0.00747 | 0.00613 | 0.00653 |
| 7.7E-07 | 0.00967 | 0.00905 | 0.00785 | 0.00591 | 0.00624 |
| 8E-07   | 0.00939 | 0.00813 | 0.00743 | 0.00508 | 0.0061  |
| 8.3E-07 | 0.00949 | 0.008   | 0.00612 | 0.00578 | 0.00586 |
| 8.6E-07 | 0.00905 | 0.00777 | 0.0066  | 0.00468 | 0.00518 |
| 9E-07   | 0.0086  | 0.00825 | 0.0061  | 0.00438 | 0.00521 |
| 9.3E-07 | 0.00866 | 0.00712 | 0.00646 | 0.00434 | 0.00441 |
| 9.6E-07 | 0.00811 | 0.00633 | 0.00689 | 0.00485 | 0.00473 |
| 9.9E-07 | 0.00767 | 0.00662 | 0.0057  | 0.00406 | 0.00515 |
| 1E-06   | 0.00784 | 0.00536 | 0.00667 | 0.00368 | 0.00371 |
| 1.1E-06 | 0.00725 | 0.00662 | 0.00551 | 0.00407 | 0.00375 |
| 1.1E-06 | 0.00732 | 0.00645 | 0.00534 | 0.00353 | 0.00443 |
| 1.1E-06 | 0.00665 | 0.00541 | 0.00512 | 0.00373 | 0.00381 |
| 1.2E-06 | 0.00655 | 0.00586 | 0.00412 | 0.00383 | 0.00478 |
| 1.2E-06 | 0.00575 | 0.00511 | 0.00454 | 0.00396 | 0.00454 |
| 1.2E-06 | 0.00668 | 0.00541 | 0.00434 | 0.0026  | 0.0041  |
| 1.2E-06 | 0.00586 | 0.0052  | 0.00393 | 0.003   | 0.00403 |
| 1.3E-06 | 0.00622 | 0.00528 | 0.00364 | 0.003   | 0.00373 |
| 1.3E-06 | 0.00574 | 0.00502 | 0.00468 | 0.0028  | 0.00312 |
| 1.3E-06 | 0.00551 | 0.00464 | 0.00416 | 0.00406 | 0.00326 |
| 1.4E-06 | 0.00551 | 0.0049  | 0.00417 | 0.00243 | 0.00274 |
| 1.4E-06 | 0.00514 | 0.00461 | 0.00404 | 0.00228 | 0.00343 |
| 1.4E-06 | 0.00498 | 0.00545 | 0.00359 | 0.00193 | 0.00349 |
| 1.5E-06 | 0.00457 | 0.00402 | 0.00315 | 0.00281 | 0.00292 |
| 1.5E-06 | 0.00487 | 0.00425 | 0.0027  | 0.00229 | 0.00262 |
| 1.5E-06 | 0.00555 | 0.00405 | 0.00292 | 0.00259 | 0.00201 |
| 1.6E-06 | 0.00472 | 0.00415 | 0.00306 | 0.00214 | 0.00326 |
| 1.6E-06 | 0.00433 | 0.00462 | 0.00285 | 0.00135 | 0.0032  |
| 1.6E-06 | 0.0042  | 0.00484 | 0.0032  | 0.00181 | 0.00307 |
| 1.7E-06 | 0.00409 | 0.00423 | 0.00246 | 0.00208 | 0.00385 |
| 1.7E-06 | 0.00369 | 0.00437 | 0.00262 | 0.00229 | 0.00303 |
| 1.7E-06 | 0.00388 | 0.00311 | 0.00293 | 0.00239 | 0.00292 |
| 1.8E-06 | 0.00398 | 0.00365 | 0.00258 | 0.00209 | 0.00322 |
| 1.8E-06 | 0.00496 | 0.00388 | 0.00367 | 0.00142 | 0.00378 |
| 1.8E-06 | 0.00373 | 0.00286 | 0.00228 | 0.00186 | 0.00323 |
| 1.9E-06 | 0.0034  | 0.00348 | 0.00235 | 0.00122 | 0.003   |
| 1.9E-06 | 0.00377 | 0.00305 | 0.0022  | 0.00164 | 0.00242 |
| 1.9E-06 | 0.00431 | 0.00283 | 0.00238 | 0.00152 | 0.00185 |
| 2E-06   | 0.00328 | 0.00261 | 0.00192 | 0.00095 | 0.00241 |
| 2E-06   | 0.00362 | 0.00238 | 0.00188 | 0.00176 | 0.0026  |
| 2E-06   | 0.00337 | 0.00306 | 0.00291 | 0.00095 | 0.00258 |
| 2E-06   | 0.00377 | 0.00266 | 0.00188 | 0.00057 | 0.00281 |
| 2.1E-06 | 0.00362 | 0.00283 | 0.00218 | 0.00131 | 0.00228 |
| 2.1E-06 | 0.00337 | 0.00223 | 0.00212 | 0.00161 | 0.00248 |
| 2.1E-06 | 0.00299 | 0.00278 | 0.00184 | 0.00141 | 0.00254 |
| 2.2E-06 | 0.00271 | 0.00309 | 0.00195 | 0.00112 | 0.0019  |
| 2.2E-06 | 0.00336 | 0.00242 | 0.00287 | 0.00046 | 0.00235 |
| 2.2E-06 | 0.00269 | 0.00299 | 0.00158 | 0.00088 | 0.00228 |
| 2.3E-06 | 0.00276 | 0.00257 | 0.00141 | 0.00142 | 0.00221 |

|         |         |         |         |         |         |
|---------|---------|---------|---------|---------|---------|
| 2.3E-06 | 0.00299 | 0.00229 | 0.00245 | 0.00086 | 0.00252 |
| 2.3E-06 | 0.00227 | 0.00249 | 0.00211 | 0.00133 | 0.00221 |
| 2.4E-06 | 0.00235 | 0.00242 | 0.00085 | 0.00144 | 0.00309 |
| 2.4E-06 | 0.0026  | 0.00223 | 0.00161 | 0.00094 | 0.00255 |
| 2.4E-06 | 0.00245 | 0.0029  | 0.00177 | 0.00101 | 0.00243 |
| 2.5E-06 | 0.00272 | 0.00196 | 0.00187 | 0.00081 | 0.00286 |
| 2.5E-06 | 0.00244 | 0.00238 | 0.00174 | 0.00085 | 0.00242 |
| 2.5E-06 | 0.00197 | 0.00225 | 0.00189 | 0.00122 | 0.00253 |
| 2.6E-06 | 0.00178 | 0.00233 | 0.00079 | 0.00125 | 0.00275 |
| 2.6E-06 | 0.00236 | 0.00197 | 0.00182 | 0.00134 | 0.00226 |
| 2.6E-06 | 0.00197 | 0.00179 | 0.00207 | 0.00078 | 0.00268 |
| 2.7E-06 | 0.00233 | 0.00234 | 0.00058 | 0.00081 | 0.00206 |
| 2.7E-06 | 0.00167 | 0.00165 | 0.00112 | 0.00086 | 0.00266 |
| 2.7E-06 | 0.00195 | 0.00208 | 0.00115 | 0.00138 | 0.00148 |
| 2.8E-06 | 0.00238 | 0.00176 | 0.00108 | 0.00144 | 0.00223 |
| 2.8E-06 | 0.00259 | 0.00185 | 0.00134 | 0.00112 | 0.00266 |
| 2.8E-06 | 0.00211 | 0.00203 | 0.00158 | 0.00056 | 0.00267 |
| 2.8E-06 | 0.00161 | 0.00216 | 8.7E-05 | 0.00104 | 0.00208 |
| 2.9E-06 | 0.00189 | 0.00211 | 0.00088 | 0.00048 | 0.00231 |
| 2.9E-06 | 0.00209 | 0.00209 | 0.00064 | 0.00113 | 0.00234 |
| 2.9E-06 | 0.00133 | 0.00292 | 0.00047 | 0.00091 | 0.00202 |
| 3E-06   | 0.00156 | 0.0019  | 0.00026 | 0.00039 | 0.00249 |
| 3E-06   | 0.0011  | 0.00141 | 0.00066 | 6.9E-05 | 0.00201 |
| 3E-06   | 0.00127 | 0.00209 | 0.00098 | 0.00051 | 0.00229 |
| 3.1E-06 | 0.00167 | 0.00191 | 0.00086 | 0.00088 | 0.0023  |
| 3.1E-06 | 0.00108 | 0.00151 | 0.00104 | 0.0009  | 0.00299 |
| 3.1E-06 | 0.00177 | 0.00079 | 0.00118 | 0.00134 | 0.00232 |
| 3.2E-06 | 0.0011  | 0.001   | 0.00099 | 0.00055 | 0.00251 |
| 3.2E-06 | 0.00091 | 0.00211 | 0.00161 | 0.00118 | 0.00202 |
| 3.2E-06 | 0.00133 | 0.00121 | 0.00083 | 0.00035 | 0.00268 |
| 3.3E-06 | 0.00023 | 0.00103 | 0.00098 | 0.0012  | 0.00177 |
| 3.3E-06 | 0.00164 | 0.00098 | 0.00033 | 0.00109 | 0.00124 |
| 3.3E-06 | 0.00184 | 0.00159 | 0.00096 | 0.00071 | 0.00193 |
| 3.4E-06 | 0.0016  | 0.00169 | 0.0014  | 0.00059 | 0.00138 |
| 3.4E-06 | 0.00091 | 0.00104 | 0.0009  | 0.00071 | 0.00179 |
| 3.4E-06 | 0.00114 | 0.00099 | 0.00127 | 0.00136 | 0.00244 |
| 3.5E-06 | 0.00052 | 0.00096 | 0.00092 | 0.00104 | 0.00264 |
| 3.5E-06 | 0.00135 | 0.00133 | 0.0008  | 0.0004  | 0.00298 |
| 3.5E-06 | 0.00128 | 0.00116 | 0.0009  | 0.00076 | 0.00208 |
| 3.6E-06 | 0.00154 | 0.00102 | 0.00098 | 0.00102 | 0.0018  |
| 3.6E-06 | 0.00186 | 0.00096 | 0.00105 | 0.00113 | 0.00205 |
| 3.6E-06 | 0.00159 | 0.00048 | 0.00118 | 0.00143 | 0.00188 |
| 3.6E-06 | 0.00166 | 0.00107 | 0.00045 | 0.0007  | 0.0019  |
| 3.7E-06 | 0.00182 | 0.00072 | -0.0001 | 0.00062 | 0.00188 |
| 3.7E-06 | 0.00142 | 0.00098 | 0.00067 | 0.00059 | 0.00224 |
| 3.7E-06 | 0.00131 | 0.00138 | 0.00075 | 0.00123 | 0.00248 |
| 3.8E-06 | 0.00079 | 0.00127 | 0.00014 | 0.00085 | 0.00178 |
| 3.8E-06 | 0.00154 | 0.00104 | 0.00138 | 0.00076 | 0.00181 |
| 3.8E-06 | 0.00069 | 0.0016  | 0.00105 | 0.00059 | 0.00223 |
| 3.9E-06 | 0.0017  | 0.00062 | 0.00081 | 0.00082 | 0.0019  |
| 3.9E-06 | 0.00145 | 0.00089 | 0.00117 | 0.00047 | 0.00233 |
| 3.9E-06 | 0.00094 | 0.00129 | 0.00054 | 0.00057 | 0.00169 |
| 4E-06   | 0.00099 | 0.00059 | 0.00132 | 0.00107 | 0.00207 |
| 4E-06   | 0.00067 | 0.00075 | 0.00057 | 0.00091 | 0.00258 |



|         |         |         |         |         |         |
|---------|---------|---------|---------|---------|---------|
| 4E-06   | 0.00086 | 0.00064 | 0.00074 | 0.00068 | 0.00151 |
| 4.1E-06 | 0.00074 | 0.00096 | 0.00143 | 0.0008  | 0.00132 |
| 4.1E-06 | 0.00181 | 0.00053 | 0.00088 | 0.00077 | 0.00186 |
| 4.1E-06 | 0.00106 | 0.0018  | 0.00069 | 0.00074 | 0.00218 |
| 4.2E-06 | 0.00069 | 0.00104 | 0.00107 | 0.00081 | 0.00191 |
| 4.2E-06 | 0.00112 | 0.00153 | 0.00014 | 0.0008  | 0.00122 |
| 4.2E-06 | 0.00108 | 0.0006  | 0.00115 | 0.00057 | 0.00219 |
| 4.3E-06 | 0.00049 | 0.00077 | 0.00098 | 0.00084 | 0.00161 |
| 4.3E-06 | 0.00093 | 0.00125 | 0.00079 | 0.00099 | 0.00146 |
| 4.3E-06 | 0.00099 | 0.00049 | 0.00099 | 0.00079 | 0.00138 |
| 4.4E-06 | 0.00069 | 0.00132 | 0.00075 | 0.00039 | 0.00146 |
| 4.4E-06 | 0.00034 | 0.00068 | 0.00057 | 0.00095 | 0.00152 |
| 4.4E-06 | 6.5E-05 | 0.00141 | 0.00069 | 0.00094 | 0.00205 |
| 4.4E-06 | 0.00091 | 0.00102 | 0.0003  | 0.00053 | 0.00222 |
| 4.5E-06 | 0.00039 | 0.00029 | 0.0011  | 0.0003  | 0.00224 |
| 4.5E-06 | 0.00065 | 0.00113 | 0.00063 | 0.00064 | 0.00246 |
| 4.5E-06 | 0.00041 | 0.00077 | 0.00056 | 0.00035 | 0.00264 |
| 4.6E-06 | 0.00113 | 0.00123 | 0.00036 | 0.00067 | 0.00169 |
| 4.6E-06 | 0.00081 | 0.0013  | 0.001   | 0.00107 | 0.00142 |
| 4.6E-06 | 0.00074 | 0.00106 | 0.00118 | 0.00093 | 0.00195 |
| 4.7E-06 | 0.00063 | 0.00134 | 0.00049 | 0.00102 | 0.00172 |
| 4.7E-06 | 0.00032 | 0.00066 | 0.00052 | 0.00094 | 0.00124 |
| 4.7E-06 | 0.00039 | 0.00213 | 0.00084 | 0.00114 | 0.00186 |
| 4.8E-06 | 0.00026 | 0.00098 | 5.2E-05 | 0.00023 | 0.00145 |
| 4.8E-06 | 0.00119 | 0.0006  | 0.00035 | 0.00094 | 0.00155 |
| 4.8E-06 | 0.00073 | 0.00068 | 0.00051 | 0.00105 | 0.00227 |
| 4.9E-06 | 0.00061 | 0.00112 | 0.00085 | 0.00067 | 0.00238 |
| 4.9E-06 | 0.00111 | 0.00124 | 0.00078 | 0.00052 | 0.00174 |
| 4.9E-06 | 0.001   | 0.00083 | 0.00083 | 0.00052 | 0.00176 |
| 5E-06   | 0.00045 | 0.00079 | 0.0008  | 0.00091 | 0.00202 |
| 5E-06   | -4E-05  | 0.00035 | 0.00095 | 0.00107 | 0.002   |
| 5E-06   | 0.00039 | 0.00045 | 0.00063 | 0.00033 | 0.00193 |
| 5.1E-06 | 0.00045 | 0.00102 | 0.00086 | 0.00071 | 0.00122 |
| 5.1E-06 | 0.00071 | 0.00082 | 0.00061 | 0.00073 | 0.00155 |
| 5.1E-06 | 0.00025 | 0.00134 | 0.00044 | 0.00042 | 0.00187 |
| 5.2E-06 | 0.00088 | 0.00105 | 0.00046 | 0.00027 | 0.00245 |
| 5.2E-06 | 0.00103 | 0.00027 | 0.0007  | 0.00059 | 0.00189 |
| 5.2E-06 | 6.5E-05 | 0.00077 | 0.00068 | 0.00039 | 0.00235 |
| 5.2E-06 | 0.00114 | 0.00067 | 0.0014  | 0.00088 | 0.00231 |
| 5.3E-06 | 0.00071 | 0.00126 | 0.00058 | 0.00137 | 0.00188 |
| 5.3E-06 | 0.00065 | 0.0015  | 0.00031 | 0.00035 | 0.00215 |
| 5.3E-06 | 0.00136 | 0.00115 | 0.00039 | 0.00075 | 0.00259 |
| 5.4E-06 | 0.00067 | 0.00127 | 0.0009  | 0.00082 | 0.00138 |
| 5.4E-06 | 0.00059 | 0.00041 | 0.00099 | 0.00054 | 0.00144 |
| 5.4E-06 | 0.00099 | 0.0004  | 0.00044 | 0.00098 | 0.00173 |
| 5.5E-06 | 0.00018 | -0.0002 | 0.00098 | 0.00084 | 0.00244 |
| 5.5E-06 | 0.00127 | 0.00121 | 0.00036 | 0.00033 | 0.00168 |
| 5.5E-06 | 0.0008  | 0.00123 | 0.00207 | 0.00037 | 0.00148 |
| 5.6E-06 | 0.00042 | 0.00173 | 0.0007  | 0.00021 | 0.00195 |
| 5.6E-06 | 7.6E-05 | 0.00047 | 0.00015 | 0.00017 | 0.00168 |
| 5.6E-06 | 0.00033 | 0.00116 | 0.00067 | 0.0006  | 0.00259 |
| 5.7E-06 | 0.00018 | 0.00143 | 0.00016 | 0.00074 | 0.00204 |
| 5.7E-06 | 0.00025 | 0.00056 | 0.00095 | 0.00055 | 0.00185 |
| 5.7E-06 | 0.00025 | 0.00061 | 0.00069 | 0.0011  | 0.002   |

|         |         |         |         |         |         |
|---------|---------|---------|---------|---------|---------|
| 5.8E-06 | 0.00049 | 0.0013  | 0.00075 | 0.00087 | 0.00208 |
| 5.8E-06 | 0.00065 | 0.00076 | 0.00063 | 0.00113 | 0.00187 |
| 5.8E-06 | 2.2E-05 | 0.00042 | 0.00037 | 0.00022 | 0.00288 |
| 5.9E-06 | -0.0003 | 0.00102 | 0.00094 | 0.00135 | 0.00165 |
| 5.9E-06 | 0.00123 | 0.00094 | 0.00098 | 0.0005  | 0.00144 |
| 5.9E-06 | 6.9E-05 | 0.00103 | 0.00081 | 0.00103 | 0.00133 |
| 6E-06   | 0.00018 | 0.00095 | 0.0007  | 0.0011  | 0.00179 |
| 6E-06   | -0.0004 | 0.00078 | -0.0003 | 0.00046 | 0.00154 |
| 6E-06   | 0.00045 | 0.00065 | 0.00015 | 0.0007  | 0.00178 |
| 6E-06   | 0.00063 | 0.00082 | 0.00092 | 0.00035 | 0.00229 |
| 6.1E-06 | -0.0002 | 0.0011  | 0.00117 | 0.00042 | 0.00163 |
| 6.1E-06 | 0.00117 | 0.00098 | 0.00099 | 0.00059 | 0.00223 |
| 6.1E-06 | 0.00071 | 0.00103 | 0.00061 | -0.0004 | 0.00256 |
| 6.2E-06 | -0.0005 | 0.00082 | 4.9E-05 | 0.00023 | 0.00102 |
| 6.2E-06 | 0.00016 | 0.0008  | 0.00015 | 0.00052 | 0.00156 |
| 6.2E-06 | -0.0003 | 0.00025 | 0.00067 | 0.00042 | 0.00192 |
| 6.3E-06 | -0.0003 | 0.00026 | 0.00058 | 7.4E-05 | 0.00162 |
| 6.3E-06 | 0.00025 | 0.00129 | 3.8E-05 | 0.00022 | 0.00222 |
| 6.3E-06 | 0.00019 | 0.00133 | 0.00052 | 0.00032 | 0.0015  |
| 6.4E-06 | -0.0004 | 0.00114 | 0.00088 | 0.00038 | 0.00171 |
| 6.4E-06 | 1.9E-05 | 0.00066 | 0.00041 | -0.0002 | 0.00259 |
| 6.4E-06 | 0.0003  | 0.0006  | 0.00116 | 0.00026 | 0.00228 |
| 6.5E-06 | 0.0007  | 0.00115 | 0.00097 | 0.00097 | 0.00152 |
| 6.5E-06 | 0.00036 | 0.00036 | 0.00074 | 0.00037 | 0.00226 |
| 6.5E-06 | -0.0004 | 0.00138 | 5.4E-05 | -7E-05  | 0.00196 |
| 6.6E-06 | 0.00085 | 0.0003  | 0.00013 | 6.6E-05 | 0.00173 |
| 6.6E-06 | 0.00025 | 0.00187 | 0.00049 | -0.0009 | 0.00132 |
| 6.6E-06 | 0.00086 | 0.00043 | 0.0008  | 0.00059 | 0.00164 |
| 6.7E-06 | 0.00063 | 0.00052 | 0.00115 | 0.00106 | 0.00146 |
| 6.7E-06 | 0.00036 | 0.00121 | 0.00049 | 1E-05   | 0.0025  |
| 6.7E-06 | 0.00015 | 0.00096 | 0.00139 | -0.0005 | 0.0014  |
| 6.8E-06 | 0.00043 | 0.00025 | -2E-05  | 0.00092 | 0.00101 |
| 6.8E-06 | 0.00031 | 0.00095 | 0.00095 | -7E-05  | 0.00179 |
| 6.8E-06 | 0.00038 | 0.00031 | 0.00057 | 0.00067 | 0.00109 |
| 6.8E-06 | 0.00047 | 0.00079 | 0.00095 | 0.00045 | 0.00126 |
| 6.9E-06 | 0.00017 | 0.00104 | 0.00068 | 0.00089 | 0.00182 |
| 6.9E-06 | 7.5E-05 | 0.0021  | 0.00039 | 0.00097 | 0.00227 |
| 6.9E-06 | -0.0003 | 0.00119 | 0.00033 | 0.00027 | 0.00175 |
| 7E-06   | 0.00069 | 0.00107 | 0.00046 | -0.0002 | 0.0013  |
| 7E-06   | 0.00046 | 0.0016  | 0.0009  | 0.00044 | 0.00199 |
| 7E-06   | 0.00077 | 0.00107 | -0.0003 | 0.0007  | 0.00168 |
| 7.1E-06 | 0.00109 | 0.00087 | -0.0002 | 0.0011  | 0.00207 |
| 7.1E-06 | -1E-04  | 0.00068 | 1E-05   | 0.00115 | 0.00161 |
| 7.1E-06 | 0.00057 | 1.7E-05 | -0.0002 | 0.00026 | 0.00216 |
| 7.2E-06 | 0.00023 | 0.0008  | 0.0006  | 0.00046 | 0.00082 |
| 7.2E-06 | -0.0004 | 0.00076 | 0.00081 | 0.00063 | 0.00187 |
| 7.2E-06 | 0.00082 | 0.00048 | 0.00057 | 0.00134 | 0.00201 |
| 7.3E-06 | 0.00035 | 0.00097 | 0.00072 | 0.00044 | 0.00203 |
| 7.3E-06 | 6.9E-05 | 0.00153 | 0.00033 | 0.00047 | 0.00231 |
| 7.3E-06 | -2E-06  | 0.00113 | 0.00074 | 0.00039 | 0.00169 |
| 7.4E-06 | -0.0001 | 0.00037 | -7E-05  | 0.00034 | 0.0013  |
| 7.4E-06 | 0.0007  | -4E-06  | 0.00079 | 0.00081 | 0.00154 |
| 7.4E-06 | 0.00017 | 0.00019 | 0.00069 | 0.00076 | 0.00165 |
| 7.5E-06 | 3.1E-05 | 0.00103 | 0.00102 | -0.0002 | 0.00156 |

|         |         |         |         |         |         |
|---------|---------|---------|---------|---------|---------|
| 7.5E-06 | -0.0001 | 0.00154 | 0.00064 | 0.00061 | 0.00197 |
| 7.5E-06 | 0.00034 | 0.00068 | 0.0011  | -0.0001 | 0.00135 |
| 7.6E-06 | 0.00049 | 0.00122 | 0.00088 | 0.00041 | 0.00138 |
| 7.6E-06 | 0.00041 | 0.00133 | 0.00062 | 0.00079 | 0.00152 |
| 7.6E-06 | 2.6E-05 | -0.0003 | 0.00112 | -3E-05  | 0.00138 |
| 7.6E-06 | -0.0003 | 0.00151 | 0.00029 | 0.00028 | 0.0023  |
| 7.7E-06 | 0.00034 | 0.00162 | 0.00048 | 0.00012 | 0.0012  |
| 7.7E-06 | 0.00045 | 0.00113 | 0.00107 | 0.00054 | 0.00201 |
| 7.7E-06 | -0.0006 | 0.00108 | 0.00107 | 0.00017 | 0.00158 |
| 7.8E-06 | 0.00026 | 0.00056 | -3E-05  | -0.0003 | 0.00197 |
| 7.8E-06 | -0.0006 | 0.00098 | 0.00126 | 0.00044 | 0.0016  |
| 7.8E-06 | 0.00017 | 0.00063 | 0.00053 | 0.00013 | 0.00191 |
| 7.9E-06 | -0.0004 | -0.0002 | 0.00071 | 0.0006  | 0.00172 |
| 7.9E-06 | 0.00031 | 0.00103 | 0.00102 | 0.00102 | 0.00151 |
| 7.9E-06 | -0.0004 | 0.00024 | 0.00093 | -0.0002 | 0.00178 |
| 8E-06   | -0.0007 | 0.00089 | 0.0008  | 0.00021 | 0.00245 |
| 8E-06   | -8E-05  | 0.00065 | 0.00092 | -0.0002 | 0.00154 |
| 8E-06   | 0.00044 | -0.0004 | 3.4E-05 | 0.00075 | 0.00244 |
| 8.1E-06 | -0.0002 | 0.00034 | -0.0004 | 0.00067 | 0.00242 |
| 8.1E-06 | -0.0002 | 0.00068 | 0.00048 | 0.00012 | 0.00123 |
| 8.1E-06 | 0.00056 | 0.00148 | 0.00073 | 0.00035 | 0.00234 |
| 8.2E-06 | 0.00116 | 0.00147 | 0.00094 | -9E-05  | 0.00119 |
| 8.2E-06 | 0.00089 | -0.0003 | 0.00139 | 0.00038 | 0.00189 |
| 8.2E-06 | 0.00062 | 0.00037 | 0.00123 | 0.00081 | 0.00206 |
| 8.3E-06 | -0.0008 | 0.00034 | 0.00097 | 0.00029 | 0.00158 |
| 8.3E-06 | 0.00062 | 0.00104 | 0.00051 | 0.00122 | 0.00258 |
| 8.3E-06 | 0.00031 | 0.00108 | 0.0004  | 0.00046 | 0.00204 |
| 8.4E-06 | -0.0002 | 0.00114 | 0.00095 | 0.00053 | 0.00168 |
| 8.4E-06 | -0.0003 | 0.00128 | 0.00013 | 0.00056 | 0.00198 |
| 8.4E-06 | 0.00021 | 0.00076 | 0.00078 | -0.0004 | 0.0012  |
| 8.4E-06 | -2E-06  | -0.0002 | 0.00108 | -4E-05  | 0.00173 |
| 8.5E-06 | -0.0003 | 0.00048 | 1.3E-05 | -3E-05  | 0.00154 |
| 8.5E-06 | 0.00023 | 0.00106 | 0.00063 | 3.8E-05 | 0.0014  |
| 8.5E-06 | 0.00019 | 0.00091 | 0.0004  | -7E-05  | 0.00185 |
| 8.6E-06 | -0.0005 | 0.00099 | 0.00053 | 0.00041 | 0.00117 |
| 8.6E-06 | 0.00013 | 0.00145 | 0.00128 | 0.00017 | 0.00192 |
| 8.6E-06 | 0.0002  | 0.00081 | 0.00053 | 0.00045 | 0.00151 |
| 8.7E-06 | 0.00063 | 0.00113 | 0.00098 | -0.0006 | 0.00207 |
| 8.7E-06 | 0.00018 | 0.00014 | 0.00026 | 0.00044 | 0.0018  |
| 8.7E-06 | 0.00022 | 0.00055 | 0.00039 | 0.00051 | 0.0014  |
| 8.8E-06 | 0.00017 | 0.00127 | -0.0002 | -0.0002 | 0.00189 |
| 8.8E-06 | -6E-05  | 0.00096 | 0.00038 | 0.00011 | 0.00141 |
| 8.8E-06 | -0.0002 | 0.00045 | 0.00021 | -0.0003 | 0.00142 |
| 8.9E-06 | 0.00046 | -0.0003 | 0.00054 | -0.0002 | 0.00182 |
| 8.9E-06 | -0.0002 | 0.00031 | 0.00063 | -0.0002 | 0.00201 |
| 8.9E-06 | 0.0008  | 0.00171 | 0.00049 | 0.00027 | 0.00218 |
| 9E-06   | 0.00087 | 0.00076 | 0.00039 | 0.00012 | 0.00209 |
| 9E-06   | 0.00015 | -3E-05  | 0.00011 | 0.00035 | 0.00162 |
| 9E-06   | 0.00036 | 0.0009  | 0.00029 | 4.1E-05 | 0.00147 |
| 9.1E-06 | 0.00041 | 0.00081 | -0.0001 | 0.00057 | 0.00097 |
| 9.1E-06 | 0.00031 | 0.00032 | 0.00095 | 0.00015 | 0.00088 |
| 9.1E-06 | 0.00035 | 0.00051 | 0.00024 | -0.0003 | 0.00164 |
| 9.2E-06 | 0.00037 | 0.00148 | 0.00075 | 0.00023 | 0.00157 |
| 9.2E-06 | 0.00086 | 0.00073 | 0.00042 | 0.00109 | 0.0021  |

|         |         |         |         |         |         |
|---------|---------|---------|---------|---------|---------|
| 9.2E-06 | 0.00011 | 0.00051 | 0.00048 | 0.00053 | 0.00145 |
| 9.2E-06 | 0.0002  | 0.001   | 0.0006  | 2.1E-05 | 0.00172 |
| 9.3E-06 | -0.0003 | 0.00052 | 0.00117 | -2E-06  | 0.00191 |
| 9.3E-06 | 9E-05   | 0.00034 | 0.00064 | 0.00055 | 0.00176 |
| 9.3E-06 | 0.00078 | 0.00076 | 0.00044 | -8E-05  | 0.00156 |
| 9.4E-06 | 3E-05   | 0.00071 | 0.00134 | 1.1E-05 | 0.00212 |
| 9.4E-06 | 0.00068 | -0.0004 | 0.00042 | 0.00053 | 0.00163 |
| 9.4E-06 | -0.0003 | 0.00022 | 0.00073 | -0.0005 | 0.00171 |
| 9.5E-06 | -0.0003 | 0.00144 | 0.00066 | 0.0009  | 0.00243 |
| 9.5E-06 | -0.0003 | 0.00013 | 0.00102 | 0.00025 | 0.00239 |
| 9.5E-06 | 0.00089 | 0.00097 | -0.0002 | -0.0002 | 0.00148 |
| 9.6E-06 | -5E-05  | 0.00083 | 0.00065 | -0.0002 | 0.00183 |
| 9.6E-06 | 2.5E-05 | 0.00072 | 0.00023 | -0.0001 | 0.00171 |
| 9.6E-06 | 3E-05   | 0.00126 | 0.00062 | 0.00032 | 0.00152 |
| 9.7E-06 | 0.00049 | 0.00049 | 0.00035 | -0.0003 | 0.00184 |
| 9.7E-06 | 0.00042 | 0.00128 | -5E-06  | 0.00039 | 0.00226 |
| 9.7E-06 | 0.00032 | 0.00083 | -0.0003 | 0.00114 | 0.00265 |
| 9.8E-06 | -0.0001 | 5.5E-05 | 0.00065 | 0.00073 | 0.00147 |
| 9.8E-06 | -0.0002 | 0.00078 | 0.00079 | 0.00058 | 0.00186 |
| 9.8E-06 | -0.0001 | 0.00106 | 0.00141 | 0.00076 | 0.00125 |
| 9.9E-06 | 0.00054 | -0.0004 | 5.7E-05 | 0.00025 | 0.00181 |
| 9.9E-06 | 0.00024 | 0.00032 | 0.00067 | 0.00099 | 0.00112 |
| 9.9E-06 | 0.00031 | 0.00112 | -0.0002 | -0.0002 | 0.00194 |
| 1E-05   | -0.0006 | 0.00052 | 0.00053 | 0.00035 | 0.00097 |
| 1E-05   | 0.00039 | 0.00054 | 0.0009  | 0.0005  | 0.00197 |
| 1E-05   | 0.0008  | 0.00147 | 0.00108 | 0.00028 | 0.00162 |
| 1E-05   | -7E-05  | 0.00109 | 0.0004  | 4.2E-05 | 0.00165 |
| 1E-05   | 0.00041 | 0.00081 | 0.00093 | 0.00012 | 0.00123 |
| 1E-05   | 0.00091 | 0.00123 | -0.0001 | 0.00078 | 0.00253 |
| 1E-05   | 0.00066 | 0.00063 | 0.00013 | 0.00077 | 0.00123 |
| 1E-05   | 0.00027 | 0.00011 | 0.00023 | 0.00086 | 0.00178 |
| 1E-05   | -0.0002 | 0.00088 | 0.00033 | 1.7E-05 | 0.00155 |
| 1E-05   | -0.0002 | 0.00064 | 0.00096 | -0.0004 | 0.00124 |
| 1E-05   | 8.5E-05 | 7.1E-05 | 0.00062 | -0.0003 | 0.00216 |
| 1E-05   | -0.0002 | 0.0003  | -3E-05  | 0.00043 | 0.00132 |
| 1E-05   | 0.00051 | 0.00061 | 0.0009  | -9E-05  | 0.00138 |
| 1E-05   | 0.0003  | 3.3E-05 | 0.00035 | 0.00051 | 0.00169 |
| 1E-05   | 0.00026 | 0.00069 | -6E-05  | -8E-05  | 0.00213 |
| 1E-05   | -0.0005 | 0.00029 | 0.00081 | 0.00036 | 0.00177 |
| 1E-05   | 0.00024 | -8E-05  | 0.00061 | 0.001   | 0.00105 |
| 1.1E-05 | -0.0001 | 0.00034 | 0.00037 | -0.0005 | 0.00139 |
| 1.1E-05 | 0.00036 | 0.001   | 0.00042 | 0.00096 | 0.00151 |
| 1.1E-05 | 0.00026 | 0.00038 | 0.00105 | 0.00036 | 0.00129 |
| 1.1E-05 | 0.00047 | 0.00074 | -0.0002 | 0.00031 | 0.00152 |
| 1.1E-05 | 0.00038 | 0.00032 | 0.0005  | -9E-05  | 0.001   |
| 1.1E-05 | -0.0002 | 0.00037 | 0.00093 | -0.0004 | 0.00228 |
| 1.1E-05 | 5.6E-05 | 0.00135 | 0.001   | 0.00044 | 0.00128 |
| 1.1E-05 | 1.3E-05 | 0.00086 | 0.00033 | -5E-05  | 0.00143 |
| 1.1E-05 | 0.00074 | 0.00079 | 0.00055 | 5.4E-05 | 0.00115 |
| 1.1E-05 | 0.00032 | 0.00096 | 0.00024 | 0.00064 | 0.00207 |
| 1.1E-05 | 7E-05   | 0.00175 | -0.0001 | 1.6E-05 | 0.00179 |
| 1.1E-05 | 0.00061 | 0.00097 | 0.00029 | 0.00011 | 0.00152 |
| 1.1E-05 | 0.00078 | 0.0012  | 0.00033 | -0.0004 | 0.00181 |
| 1.1E-05 | 0.00018 | 0.00086 | 0.00108 | -0.0002 | 0.00155 |

|         |         |         |         |         |         |
|---------|---------|---------|---------|---------|---------|
| 1.1E-05 | 7.1E-05 | 0.001   | 0.00045 | 0.00042 | 0.00126 |
| 1.1E-05 | 0.00026 | 0.0012  | 0.0004  | 0.00033 | 0.00209 |
| 1.1E-05 | 0.00017 | 0.00114 | 0.00032 | 0.00021 | 0.00154 |
| 1.1E-05 | -0.0003 | 0.00127 | 0.00059 | 3.9E-05 | 0.0026  |
| 1.1E-05 | -0.0001 | 0.00017 | 0.00043 | 0.0002  | 0.00217 |
| 1.1E-05 | -0.0005 | -0.0005 | 0.00033 | 0.00018 | 0.00171 |
| 1.1E-05 | -0.0005 | 0.00051 | 0.00042 | -0.0004 | 0.00177 |
| 1.1E-05 | 0.00043 | 0.00046 | 0.00012 | -1E-04  | 0.00236 |
| 1.1E-05 | -0.0003 | -0.0003 | 1.7E-05 | -0.0001 | 0.00178 |
| 1.1E-05 | -0.0004 | -0.0002 | 5E-05   | 0.0007  | 0.00231 |
| 1.1E-05 | 0.00077 | 0.00047 | 9.5E-05 | 6.9E-05 | 0.00173 |
| 1.1E-05 | 0.00024 | 0.00091 | 0.00024 | 0.00064 | 0.0019  |
| 1.1E-05 | 1.5E-05 | 0.0013  | 0.00112 | 0.00041 | 0.00126 |
| 1.1E-05 | 0.0003  | 0.00069 | 6.2E-05 | -7E-05  | 0.00247 |
| 1.1E-05 | 0.0003  | 0.00022 | -0.0002 | 0.00051 | 0.00087 |
| 1.1E-05 | -5E-05  | 0.00062 | 0.00049 | 3.6E-05 | 0.002   |
| 1.1E-05 | -0.0006 | 0.0003  | 0.0003  | 0.00017 | 0.00199 |
| 1.1E-05 | 0.00037 | 0.00046 | 0.0003  | 1.3E-05 | 0.0022  |
| 1.2E-05 | 0.00065 | 7.6E-05 | 0.00083 | 0.00012 | 0.00241 |
| 1.2E-05 | 0.00037 | 0.00014 | -0.0006 | -0.0003 | 0.00229 |
| 1.2E-05 | 0.0002  | 0.00054 | 0.00053 | 0.00046 | 0.00236 |
| 1.2E-05 | -7E-05  | -0.0001 | 0.00082 | 0.00066 | 0.00205 |
| 1.2E-05 | 0.00111 | 0.00087 | 0.00064 | 0.00053 | 0.00192 |
| 1.2E-05 | 0.00026 | -0.0003 | 0.00077 | 0.00047 | 0.00224 |
| 1.2E-05 | 0.00021 | 0.00114 | 0.00041 | -2E-06  | 0.0021  |
| 1.2E-05 | -0.0005 | 0.00025 | 0.0003  | -2E-05  | 0.00097 |
| 1.2E-05 | 0.00011 | 0.0003  | 0.00076 | 0.00062 | 0.00224 |
| 1.2E-05 | -0.0003 | 0.00089 | 0.00083 | 0.00021 | 0.00192 |
| 1.2E-05 | 0.00039 | 0.00019 | 0.00018 | -8E-05  | 0.00097 |
| 1.2E-05 | -1E-05  | 0.0004  | 0.00052 | -5E-05  | 0.00179 |
| 1.2E-05 | -0.0002 | -0.0002 | 8.4E-05 | -0.0003 | 0.00241 |
| 1.2E-05 | -0.0002 | -6E-05  | 0.00103 | 7.5E-05 | 0.00164 |
| 1.2E-05 | 0.0007  | 0.00045 | 7.5E-06 | -0.0008 | 0.00168 |
| 1.2E-05 | 0.00035 | 4.9E-05 | 4.2E-05 | 0.00044 | 0.00145 |
| 1.2E-05 | 0.00017 | 0.00065 | 0.0005  | 8.8E-07 | 0.00192 |
| 1.2E-05 | -0.0005 | 0.00103 | 0.00046 | 0.00053 | 0.00189 |
| 1.2E-05 | 0.00049 | 0.00087 | 0.00056 | 0.00044 | 0.00166 |
| 1.2E-05 | -0.0001 | 0.0008  | 0.00103 | -0.0002 | 0.00159 |
| 1.2E-05 | 0.0008  | 0.00048 | 0.00015 | 0.00025 | 0.0012  |
| 1.2E-05 | 0.00114 | 0.00106 | 0.00028 | 0.0006  | 0.00171 |
| 1.2E-05 | 8.7E-05 | 0.00138 | 0.00077 | 2.8E-06 | 0.00214 |
| 1.2E-05 | 2.7E-05 | 0.00077 | 0.00043 | 0.00043 | 0.00185 |
| 1.2E-05 | -0.0005 | 0.00081 | 0.00023 | 0.0004  | 0.00189 |
| 1.2E-05 | 0.00122 | 0.00108 | -1E-05  | 0.00016 | 0.0019  |
| 1.2E-05 | 0.00022 | 0.00054 | 0.00016 | 0.0004  | 0.00125 |
| 1.2E-05 | -0.0003 | 0.00122 | -0.0002 | -0.0001 | 0.0012  |
| 1.2E-05 | 0.00013 | 0.00098 | -1E-05  | 0.00033 | 0.00175 |
| 1.2E-05 | 0.00056 | 0.00124 | 0.00054 | 0.00095 | 0.00131 |
| 1.2E-05 | 0.00022 | 0.00094 | 0.00027 | 0.00043 | 0.0018  |
| 1.3E-05 | 0.00109 | 0.00082 | 0.0002  | 0.00014 | 0.00125 |
| 1.3E-05 | 0.00082 | 0.00091 | 0.0007  | -0.0003 | 0.0014  |
| 1.3E-05 | 0.00024 | -0.0001 | 0.00083 | -0.0001 | 0.00259 |
| 1.3E-05 | -0.0001 | 0.00052 | 0.00016 | -4E-05  | 0.0026  |
| 1.3E-05 | 0.00068 | 0.00072 | 0.00048 | 0.00025 | 0.00168 |

|         |         |         |         |         |         |
|---------|---------|---------|---------|---------|---------|
| 1.3E-05 | -5E-05  | 0.00193 | 0.00082 | 0.00027 | 0.0018  |
| 1.3E-05 | 0.00062 | 0.0004  | -0.0003 | 0.00024 | 0.00165 |
| 1.3E-05 | 0.00083 | 0.00045 | 0.0003  | -0.0003 | 0.00126 |
| 1.3E-05 | 0.00044 | 0.00042 | 0.00015 | 0.00043 | 0.00237 |
| 1.3E-05 | -0.0001 | 0.00049 | 0.00012 | -0.0005 | 0.00169 |
| 1.3E-05 | -0.0002 | 0.00041 | 3.8E-05 | 9E-05   | 0.00189 |
| 1.3E-05 | 0.00096 | 0.0002  | 0.00073 | 0.00065 | 0.00098 |
| 1.3E-05 | 0.00098 | 0.00089 | 0.00061 | -0.0001 | 0.00225 |
| 1.3E-05 | 1.5E-05 | 0.00163 | 0.00013 | 9.1E-05 | 0.00137 |
| 1.3E-05 | 0.00046 | 0.00072 | 0.00034 | 0.00026 | 0.00197 |
| 1.3E-05 | 0.00137 | 0.00011 | 0.00058 | 0.00082 | 0.00159 |
| 1.3E-05 | -0.0001 | 0.00049 | 0.0006  | 0.00035 | 0.00203 |
| 1.3E-05 | 0.00028 | 8.5E-05 | -4E-05  | 3.1E-05 | 0.00207 |
| 1.3E-05 | 0.00014 | 0.00118 | 0.0004  | 0.00052 | 0.00197 |
| 1.3E-05 | 6.4E-05 | 0.00033 | 0.00082 | 0.00018 | 0.00213 |
| 1.3E-05 | 0.00017 | 0.00018 | 0.00021 | 0.00027 | 0.00196 |
| 1.3E-05 | -0.0007 | 0.00112 | 0.00023 | 0.00023 | 0.00191 |
| 1.3E-05 | 0.0005  | 0.00136 | -4E-05  | 0.00011 | 0.00192 |
| 1.3E-05 | 0.00034 | 0.0012  | 0.00071 | 0.00049 | 0.00166 |
| 1.3E-05 | 0.00025 | 0.00166 | 0.00023 | -0.0002 | 0.00132 |
| 1.3E-05 | 0.00022 | 0.00079 | 0.00058 | 0.00077 | 0.00214 |
| 1.3E-05 | 0.00031 | -6E-05  | 0.00106 | 0.00042 | 0.00198 |
| 1.3E-05 | 0.00085 | 0.00054 | -0.0005 | -0.0009 | 0.00197 |
| 1.3E-05 | 0.00032 | 0.00024 | 0.00063 | -0.0004 | 0.00169 |
| 1.3E-05 | 3.9E-05 | 0.00035 | 0.00076 | 3.1E-05 | 0.00173 |
| 1.3E-05 | 0.00019 | 0.00026 | 0.00036 | -0.0002 | 0.00167 |
| 1.4E-05 | 0.00027 | 0.00098 | 0.00036 | -0.0009 | 0.00192 |
| 1.4E-05 | -1E-04  | 0.00066 | 0.00026 | -0.0002 | 0.0023  |
| 1.4E-05 | -0.0005 | 0.00035 | 0.00052 | 0.00033 | 0.00113 |
| 1.4E-05 | 0.00069 | 0.00081 | 0.00032 | 1.7E-05 | 0.00109 |
| 1.4E-05 | 0.00084 | 9.7E-06 | 0.00051 | -5E-05  | 0.00206 |
| 1.4E-05 | 0.00023 | 0.0008  | 0.00067 | -0.0002 | 0.00159 |
| 1.4E-05 | 0.00086 | 0.00036 | 0.00014 | 0.00029 | 0.00198 |
| 1.4E-05 | -4E-05  | -0.0004 | -0.0004 | -0.0002 | 0.00117 |
| 1.4E-05 | 0.00033 | -0.0004 | 9.6E-05 | -1E-04  | 0.00234 |
| 1.4E-05 | -0.0001 | -0.0004 | 5.7E-05 | 0.00048 | 0.00261 |
| 1.4E-05 | 0.00015 | 0.00083 | 9.3E-05 | -2E-06  | 0.00188 |
| 1.4E-05 | 0.00036 | 0.00012 | 0.00027 | 0.00019 | 0.00198 |
| 1.4E-05 | 0.00051 | -0.0004 | -8E-05  | 0.00023 | 0.00174 |
| 1.4E-05 | 0.00028 | -5E-05  | -4E-05  | 0.0006  | 0.00155 |
| 1.4E-05 | 0.00043 | 0.0008  | 0.00021 | 0.00017 | 0.00226 |
| 1.4E-05 | -2E-05  | 0.00036 | 0.00075 | 0.00013 | 0.00113 |
| 1.4E-05 | 4.7E-05 | 0.00074 | 3.4E-05 | -0.0002 | 0.00205 |
| 1.4E-05 | 0.00091 | 0.00048 | 0.00068 | 0.00013 | 0.00202 |
| 1.4E-05 | 0.00073 | 0.00093 | 0.00023 | 0.00076 | 0.00159 |
| 1.4E-05 | 0.00024 | 0.00116 | 0.00071 | -5E-05  | 0.0011  |
| 1.4E-05 | 0.00011 | 0.00113 | 0.00063 | 0.00017 | 0.00181 |
| 1.4E-05 | 0.00047 | 0.00019 | 0.00066 | 9.3E-05 | 0.00163 |
| 1.4E-05 | 0.00032 | 1.2E-06 | 0.00051 | 0.0002  | 0.00129 |
| 1.4E-05 | 0.00031 | 0.00091 | -9E-05  | -0.0008 | 0.00148 |
| 1.4E-05 | 0.00074 | 0.00079 | 0.00013 | 3.9E-06 | 0.00224 |
| 1.4E-05 | 0.00073 | 0.00042 | 0.00036 | 0.00105 | 0.00268 |
| 1.4E-05 | -0.0006 | 0.00109 | 0.00101 | -0.0005 | 0.00191 |
| 1.4E-05 | 0.00062 | 0.00063 | 0.00029 | -0.0007 | 0.00216 |

|         |         |         |         |         |         |
|---------|---------|---------|---------|---------|---------|
| 1.4E-05 | 0.00065 | 0.00059 | 0.00035 | -0.0002 | 0.00163 |
| 1.4E-05 | 6.1E-05 | 0.00063 | 1.2E-05 | -0.0003 | 0.00209 |
| 1.4E-05 | 9.1E-05 | 0.0007  | -9E-07  | -0.0004 | 0.00236 |
| 1.5E-05 | -0.0001 | 0.00018 | 0.00074 | -0.0005 | 0.0019  |
| 1.5E-05 | 0.00057 | 0.00034 | 0.00018 | -0.0004 | 0.00204 |
| 1.5E-05 | 0.00093 | 0.00097 | 1.1E-05 | 0.00014 | 0.00254 |
| 1.5E-05 | 0.00044 | -7E-05  | -0.0001 | -0.0003 | 0.00176 |
| 1.5E-05 | 0.00069 | 0.00071 | 0.00133 | -0.0002 | 0.00184 |
| 1.5E-05 | 0.00097 | 0.00013 | 0.00029 | -0.0007 | 0.00167 |
| 1.5E-05 | 0.00044 | 0.00029 | 0.0006  | -0.0004 | 0.00184 |
| 1.5E-05 | 0.00029 | 0.00045 | 0.00079 | -0.0004 | 0.00191 |
| 1.5E-05 | 0.00026 | 0.00058 | 0.00042 | 5.5E-05 | 0.002   |
| 1.5E-05 | 0.00014 | 0.00051 | 2.1E-05 | -4E-05  | 0.00138 |
| 1.5E-05 | 0.00062 | 5.2E-05 | 0.00081 | 0.00031 | 0.00177 |
| 1.5E-05 | 0.00076 | -2E-05  | 0.0005  | -0.0001 | 0.00123 |
| 1.5E-05 | 0.0005  | 0.00022 | 0.00019 | 0.00014 | 0.0015  |
| 1.5E-05 | -0.0001 | 0.00068 | 0.00061 | 0.00013 | 0.00166 |
| 1.5E-05 | 0.00068 | 0.0009  | 0.0002  | 0.00011 | 0.00247 |
| 1.5E-05 | 0.00033 | 0.00016 | -0.0003 | -0.0002 | 0.00174 |

**Table SI.6:** Primary kinetic data for the reaction of 1-cyclohexyl-2-pyrrolidone (**S6**) with CumO• generated by 355 nm LFP in MeCN (**Figure SI.6**).

| t / s   | $\Delta A$ 1-cyclohexyl-2-pyrrolidone ( <b>S6</b> ) |               |               |               |               |
|---------|-----------------------------------------------------|---------------|---------------|---------------|---------------|
|         | <b>0.0610M</b>                                      | <b>0.136M</b> | <b>0.223M</b> | <b>0.321M</b> | <b>0.430M</b> |
| -1E-06  | 0.00052                                             | -0.0002       | -0.0006       | 0.00084       | 0.00012       |
| -1E-06  | 0.0003                                              | 3.7E-06       | -0.0008       | 0.00142       | -0.0011       |
| -9E-07  | -0.0006                                             | -7E-05        | -0.0008       | 0.00118       | -0.0008       |
| -9E-07  | -0.0002                                             | 0.00036       | -0.001        | 0.00153       | -0.0003       |
| -9E-07  | 0.00075                                             | 7.9E-05       | -0.0009       | 0.00101       | 0.00015       |
| -8E-07  | -0.0002                                             | 0.00016       | -0.0008       | 0.00189       | -0.0005       |
| -8E-07  | 9.3E-05                                             | -0.0002       | -0.001        | 0.00172       | -0.0003       |
| -8E-07  | -0.0006                                             | -0.0002       | -0.0008       | 0.00059       | -0.0004       |
| -7E-07  | -0.0006                                             | 7.6E-05       | -0.0009       | 0.00161       | -0.001        |
| -7E-07  | 0.00028                                             | -0.0001       | 0.00015       | 0.00104       | -0.0002       |
| -7E-07  | -0.0002                                             | 3.8E-05       | -0.0005       | 0.00126       | -0.0005       |
| -6E-07  | 0.00019                                             | 0.00023       | -0.0007       | 0.00076       | -8E-05        |
| -6E-07  | 1.2E-05                                             | 6E-05         | -0.0003       | 0.00125       | -0.0002       |
| -6E-07  | -0.0006                                             | 0.00035       | -0.0008       | 0.00175       | -0.0004       |
| -5E-07  | -0.0007                                             | 0.00014       | -0.0001       | 0.00112       | -0.0005       |
| -5E-07  | -0.0005                                             | 0.00017       | -0.0007       | 0.00132       | -0.0006       |
| -5E-07  | -0.0005                                             | 0.00033       | -0.0003       | 0.00056       | 0.00018       |
| -4E-07  | -1E-05                                              | -0.0004       | -0.0006       | 0.00093       | -0.0005       |
| -4E-07  | 0.0003                                              | 0.00018       | -0.0005       | 0.00109       | -0.0008       |
| -4E-07  | 0.00028                                             | -0.0003       | -0.0006       | 0.00114       | -0.0001       |
| -4E-07  | 7.4E-05                                             | 0.00013       | -0.0005       | 0.00062       | -0.0002       |
| -3E-07  | 0.00039                                             | -0.0005       | -0.0011       | 0.00126       | 0.00072       |
| -3E-07  | -7E-05                                              | 0.00024       | -0.0007       | 0.00149       | 0.00034       |
| -3E-07  | -0.0003                                             | 0.00026       | -8E-05        | 0.00101       | -0.0007       |
| -2E-07  | -6E-07                                              | -0.0002       | -0.0004       | 0.00126       | 0.0003        |
| -2E-07  | 0.00038                                             | -0.0001       | -0.0007       | 0.00123       | 0.00014       |
| -2E-07  | 0.00021                                             | -3E-05        | -0.0004       | 0.00093       | 0.00014       |
| -1E-07  | 0.00034                                             | 0.00029       | -0.0003       | 0.00145       | 6.6E-05       |
| -1E-07  | -0.0006                                             | 1.8E-05       | 0.00041       | 0.00088       | -0.0005       |
| -6E-08  | 0.00022                                             | -0.0002       | -0.0009       | 0.00116       | 4.3E-05       |
| -3E-08  | -0.0004                                             | 0.00032       | -0.0002       | 0.00083       | -0.0005       |
| -4E-10  | -0.0035                                             | -0.0029       | -0.0036       | -0.0029       | -0.0038       |
| 3.2E-08 | -0.0196                                             | -0.0169       | -0.0183       | -0.0184       | -0.0183       |
| 6.4E-08 | 0.00931                                             | 0.00269       | -0.0032       | -0.0065       | -0.0117       |
| 9.6E-08 | 0.0163                                              | 0.01452       | 0.01379       | 0.01391       | 0.01077       |
| 1.3E-07 | 0.01621                                             | 0.01473       | 0.01497       | 0.01593       | 0.01309       |
| 1.6E-07 | 0.0149                                              | 0.01474       | 0.01411       | 0.01486       | 0.01228       |
| 1.9E-07 | 0.015                                               | 0.01427       | 0.01399       | 0.01406       | 0.01233       |
| 2.2E-07 | 0.01432                                             | 0.01376       | 0.01314       | 0.01405       | 0.01103       |
| 2.6E-07 | 0.01421                                             | 0.01289       | 0.01302       | 0.01233       | 0.01036       |
| 2.9E-07 | 0.01291                                             | 0.01276       | 0.01108       | 0.012         | 0.00968       |
| 3.2E-07 | 0.01274                                             | 0.01184       | 0.0113        | 0.01213       | 0.00886       |
| 3.5E-07 | 0.01265                                             | 0.01132       | 0.01084       | 0.01127       | 0.00879       |
| 3.8E-07 | 0.01281                                             | 0.01092       | 0.00899       | 0.01112       | 0.00835       |
| 4.2E-07 | 0.01262                                             | 0.01093       | 0.0095        | 0.01042       | 0.00741       |
| 4.5E-07 | 0.01137                                             | 0.00953       | 0.00888       | 0.00931       | 0.00786       |
| 4.8E-07 | 0.01124                                             | 0.00998       | 0.00848       | 0.00853       | 0.00645       |
| 5.1E-07 | 0.01071                                             | 0.00969       | 0.00822       | 0.0085        | 0.00593       |
| 5.4E-07 | 0.01022                                             | 0.00931       | 0.00771       | 0.00874       | 0.00664       |



|         |         |         |         |         |         |
|---------|---------|---------|---------|---------|---------|
| 5.8E-07 | 0.00933 | 0.00863 | 0.00652 | 0.00835 | 0.00552 |
| 6.1E-07 | 0.0105  | 0.00836 | 0.007   | 0.00853 | 0.005   |
| 6.4E-07 | 0.01    | 0.00796 | 0.00717 | 0.00749 | 0.00461 |
| 6.7E-07 | 0.00974 | 0.00694 | 0.00638 | 0.00723 | 0.00437 |
| 7E-07   | 0.00861 | 0.00688 | 0.00541 | 0.00647 | 0.00482 |
| 7.4E-07 | 0.00872 | 0.00779 | 0.00625 | 0.00588 | 0.00334 |
| 7.7E-07 | 0.0082  | 0.0067  | 0.00561 | 0.0054  | 0.00354 |
| 8E-07   | 0.00811 | 0.00622 | 0.00528 | 0.00584 | 0.00347 |
| 8.3E-07 | 0.00874 | 0.00622 | 0.00497 | 0.00578 | 0.00329 |
| 8.6E-07 | 0.00771 | 0.00632 | 0.00415 | 0.00546 | 0.00224 |
| 9E-07   | 0.00706 | 0.00639 | 0.00517 | 0.00562 | 0.00246 |
| 9.3E-07 | 0.00838 | 0.00595 | 0.00457 | 0.00553 | 0.0034  |
| 9.6E-07 | 0.00635 | 0.00554 | 0.00378 | 0.00435 | 0.00222 |
| 9.9E-07 | 0.00634 | 0.00534 | 0.00359 | 0.00405 | 0.00256 |
| 1E-06   | 0.00719 | 0.00443 | 0.00378 | 0.00473 | 0.00158 |
| 1.1E-06 | 0.00665 | 0.00492 | 0.0036  | 0.00436 | 0.00177 |
| 1.1E-06 | 0.00655 | 0.00466 | 0.00362 | 0.00406 | 0.00257 |
| 1.1E-06 | 0.0065  | 0.00431 | 0.00288 | 0.00394 | 0.00178 |
| 1.2E-06 | 0.00649 | 0.00515 | 0.00338 | 0.00391 | 0.00119 |
| 1.2E-06 | 0.00538 | 0.00509 | 0.00339 | 0.00325 | 0.00193 |
| 1.2E-06 | 0.00536 | 0.00411 | 0.00379 | 0.00362 | 0.00225 |
| 1.2E-06 | 0.00563 | 0.00431 | 0.0033  | 0.00408 | 0.00083 |
| 1.3E-06 | 0.00609 | 0.00399 | 0.00299 | 0.0028  | 0.00159 |
| 1.3E-06 | 0.00605 | 0.00384 | 0.00242 | 0.00283 | 0.00112 |
| 1.3E-06 | 0.00524 | 0.00344 | 0.00245 | 0.003   | 0.0009  |
| 1.4E-06 | 0.00545 | 0.00306 | 0.00211 | 0.00332 | 0.00188 |
| 1.4E-06 | 0.00509 | 0.00309 | 0.0025  | 0.00342 | 0.00126 |
| 1.4E-06 | 0.00503 | 0.00329 | 0.00217 | 0.00285 | 0.0014  |
| 1.5E-06 | 0.00492 | 0.00329 | 0.00233 | 0.00373 | 0.00114 |
| 1.5E-06 | 0.00453 | 0.00332 | 0.00229 | 0.00277 | 0.00114 |
| 1.5E-06 | 0.00464 | 0.00375 | 0.00185 | 0.00284 | 0.00117 |
| 1.6E-06 | 0.00367 | 0.00302 | 0.00128 | 0.00294 | 0.00043 |
| 1.6E-06 | 0.00414 | 0.0031  | 0.00171 | 0.00332 | 0.00156 |
| 1.6E-06 | 0.00349 | 0.00343 | 0.00176 | 0.00312 | 0.00153 |
| 1.7E-06 | 0.00418 | 0.00296 | 0.00156 | 0.00283 | 0.0008  |
| 1.7E-06 | 0.00387 | 0.00252 | 0.00113 | 0.00312 | 0.00166 |
| 1.7E-06 | 0.00375 | 0.00228 | 0.00104 | 0.00279 | 0.00164 |
| 1.8E-06 | 0.00348 | 0.0017  | 0.00155 | 0.00284 | 0.00163 |
| 1.8E-06 | 0.0035  | 0.00148 | 0.00082 | 0.00273 | 0.00128 |
| 1.8E-06 | 0.00336 | 0.00205 | 0.00113 | 0.00284 | 0.0016  |
| 1.9E-06 | 0.00314 | 0.002   | 0.00126 | 0.00235 | 0.0005  |
| 1.9E-06 | 0.00404 | 0.00251 | 0.00154 | 0.0023  | 0.00066 |
| 1.9E-06 | 0.00296 | 0.00224 | 0.00093 | 0.00221 | 0.00043 |
| 2E-06   | 0.00262 | 0.00163 | 0.0008  | 0.00207 | -0.0002 |
| 2E-06   | 0.00308 | 0.00139 | 0.00146 | 0.00172 | 0.00136 |
| 2E-06   | 0.00296 | 0.0015  | 0.00113 | 0.00256 | 0.00173 |
| 2E-06   | 0.00282 | 0.00144 | 0.00094 | 0.00215 | 0.00136 |
| 2.1E-06 | 0.00306 | 0.00097 | 0.00088 | 0.00222 | 0.00121 |
| 2.1E-06 | 0.00311 | 0.00121 | 0.00056 | 0.00183 | 0.00031 |
| 2.1E-06 | 0.00317 | 0.00171 | 0.00143 | 0.00242 | 0.00078 |
| 2.2E-06 | 0.00192 | 0.00091 | 0.00115 | 0.0018  | 0.0007  |
| 2.2E-06 | 0.00248 | 0.00118 | 0.00068 | 0.00249 | 0.00085 |
| 2.2E-06 | 0.00257 | 0.0015  | 0.00072 | 0.00165 | 0.00038 |
| 2.3E-06 | 0.00253 | 0.00092 | 0.00104 | 0.00182 | 0.00026 |

|         |         |         |         |         |         |
|---------|---------|---------|---------|---------|---------|
| 2.3E-06 | 0.00208 | 0.00154 | 0.00136 | 0.00278 | 0.00065 |
| 2.3E-06 | 0.00259 | 0.00135 | 0.00055 | 0.00262 | 0.00095 |
| 2.4E-06 | 0.00147 | 0.00154 | 0.00017 | 0.002   | 0.00031 |
| 2.4E-06 | 0.0018  | 0.00056 | 0.0012  | 0.00216 | 0.00023 |
| 2.4E-06 | 0.0025  | 0.00099 | 0.00025 | 0.00149 | 0.00092 |
| 2.5E-06 | 0.00234 | 0.00118 | 0.00058 | 0.00179 | 0.00038 |
| 2.5E-06 | 0.00199 | 0.00105 | 0.00111 | 0.00265 | 0.00118 |
| 2.5E-06 | 0.00089 | 0.00118 | -0.0005 | 0.00237 | 0.00079 |
| 2.6E-06 | 0.00165 | 0.00094 | 0.00024 | 0.00184 | 0.00081 |
| 2.6E-06 | 0.00152 | 0.00203 | 0.00121 | 0.00217 | 0.00098 |
| 2.6E-06 | 0.0018  | 0.00169 | 0.00092 | 0.00158 | 0.0009  |
| 2.7E-06 | 0.00152 | 0.00127 | -0.0002 | 0.00193 | 0.00054 |
| 2.7E-06 | 0.00132 | 0.00184 | 0.00028 | 0.0017  | -3E-05  |
| 2.7E-06 | 0.00124 | 0.0011  | 0.00066 | 0.00176 | 0.00038 |
| 2.8E-06 | 0.00114 | 0.00085 | 0.00069 | 0.00107 | 0.00093 |
| 2.8E-06 | 0.00153 | 0.00125 | 0.00065 | 0.00315 | 0.00106 |
| 2.8E-06 | 0.00246 | 0.00094 | 0.00056 | 0.00255 | 0.0007  |
| 2.8E-06 | 0.00154 | 0.00053 | 0.00089 | 0.00259 | 0.00098 |
| 2.9E-06 | 0.00177 | 0.00107 | -0.0005 | 0.00221 | 0.00055 |
| 2.9E-06 | 0.00161 | 0.0013  | 0.0007  | 0.00252 | 0.00074 |
| 2.9E-06 | 0.00207 | 0.00111 | 0.00024 | 0.00228 | 0.00053 |
| 3E-06   | 0.00164 | 0.00045 | 0.00071 | 0.00293 | 0.00061 |
| 3E-06   | 0.00198 | 0.00116 | 0.00043 | 0.00194 | 0.00021 |
| 3E-06   | 0.00083 | 0.00049 | 0.00058 | 0.00194 | 0.00028 |
| 3.1E-06 | 0.0006  | 0.00097 | 0.00081 | 0.00165 | 0.00014 |
| 3.1E-06 | 0.00114 | 0.00026 | 0.00052 | 0.00263 | -0.0003 |
| 3.1E-06 | 0.00126 | 0.00144 | 0.00038 | 0.0028  | 0.00046 |
| 3.2E-06 | 0.00104 | 0.00055 | 0.00037 | 0.00248 | 0.00062 |
| 3.2E-06 | 0.00151 | 0.00113 | 0.00074 | 0.00148 | 0.00079 |
| 3.2E-06 | 0.00092 | 0.0006  | 0.00028 | 0.0025  | 0.00096 |
| 3.3E-06 | 0.0008  | 0.0006  | -1E-05  | 0.00193 | 0.00086 |
| 3.3E-06 | 0.00073 | -7E-06  | -0.0005 | 0.002   | 0.00104 |
| 3.3E-06 | 0.00045 | 0.00032 | -0.0003 | 0.00289 | 0.00118 |
| 3.4E-06 | 0.00144 | 0.00018 | 0.00026 | 0.00273 | 0.00078 |
| 3.4E-06 | 0.00074 | 0.00085 | 0.00087 | 0.00232 | 0.00161 |
| 3.4E-06 | 0.00126 | 0.00083 | 0.0004  | 0.0016  | 0.00014 |
| 3.5E-06 | 0.00056 | 0.00049 | -1E-05  | 0.00229 | 0.00068 |
| 3.5E-06 | 0.00125 | 0.00014 | 0.00038 | 0.00141 | 0.00141 |
| 3.5E-06 | 0.00159 | 0.00094 | 0.00066 | 0.00157 | 0.0011  |
| 3.6E-06 | 0.00054 | 0.00011 | 0.00042 | 0.00184 | 0.0007  |
| 3.6E-06 | 0.00032 | 0.00101 | 0.0005  | 0.00147 | 0.00012 |
| 3.6E-06 | 0.00091 | 0.00115 | 0.00098 | 0.0026  | 0.0012  |
| 3.6E-06 | 0.00133 | 0.00047 | 0.00118 | 0.00255 | 0.00088 |
| 3.7E-06 | 0.00037 | 0.00016 | 0.00065 | 0.00195 | 0.00129 |
| 3.7E-06 | 0.00084 | 0.00061 | 0.00077 | 0.00165 | 0.00074 |
| 3.7E-06 | 0.00134 | 0.00093 | -0.0002 | 0.00093 | 0.0005  |
| 3.8E-06 | 0.00077 | 0.00095 | 0.00041 | 0.00183 | 0.00016 |
| 3.8E-06 | 0.00089 | 0.00082 | -0.0001 | 0.00248 | 0.00055 |
| 3.8E-06 | 0.00139 | 0.00061 | -7E-05  | 0.0017  | 0.00064 |
| 3.9E-06 | 0.00196 | 5.1E-06 | 9.3E-05 | 0.00285 | 7.8E-05 |
| 3.9E-06 | 0.00068 | -3E-05  | 0.00072 | 0.00236 | 0.00053 |
| 3.9E-06 | 0.00061 | 0.00083 | 5.6E-05 | 0.00256 | 0.00066 |
| 4E-06   | 0.0015  | 0.00048 | 0.0008  | 0.00181 | 0.00075 |
| 4E-06   | 0.00035 | 0.00027 | 0.0007  | 0.00209 | 0.00051 |

|         |         |         |         |         |         |
|---------|---------|---------|---------|---------|---------|
| 4E-06   | -8E-05  | -0.0003 | 0.00076 | 0.00118 | 0.00061 |
| 4.1E-06 | 0.00036 | 0.00026 | 0.00014 | 0.00314 | 0.00015 |
| 4.1E-06 | 0.00064 | 0.00079 | 0.00033 | 0.0028  | 0.00083 |
| 4.1E-06 | 0.00056 | 0.00088 | -0.0013 | 0.00158 | 0.00028 |
| 4.2E-06 | 0.00065 | 0.00016 | 0.00011 | 0.00173 | 0.00103 |
| 4.2E-06 | 0.00074 | 0.00014 | 7E-05   | 0.00175 | 0.00066 |
| 4.2E-06 | 0.00064 | 0.0002  | 0.00091 | 0.00186 | 0.00065 |
| 4.3E-06 | 9.1E-06 | 0.00126 | 0.00026 | 0.00127 | 0.00075 |
| 4.3E-06 | 0.00098 | 0.00016 | 0.0005  | 0.00193 | 0.00033 |
| 4.3E-06 | 0.00032 | -0.0004 | 0.00093 | 0.00235 | 0.00102 |
| 4.4E-06 | 0.00048 | -0.0001 | -0.0003 | 0.00099 | 0.00021 |
| 4.4E-06 | 0.00096 | 0.00029 | 0.00021 | 0.00108 | 0.00061 |
| 4.4E-06 | 0.00098 | 8.6E-05 | -0.0004 | 0.00209 | 0.00037 |
| 4.4E-06 | 0.00074 | 0.00016 | -5E-05  | 0.00198 | -0.0005 |
| 4.5E-06 | 0.00051 | -0.0002 | -0.0009 | 0.0017  | -2E-05  |
| 4.5E-06 | 0.00114 | -0.0003 | 0.00065 | 0.00231 | 0.00117 |
| 4.5E-06 | 0.00075 | 0.00013 | -0.0008 | 0.00192 | 0.00017 |
| 4.6E-06 | 0.00074 | 0.00018 | -7E-05  | 0.00225 | 0.00046 |
| 4.6E-06 | 0.00073 | -0.0004 | 0.00048 | 0.00175 | 0.00112 |
| 4.6E-06 | 0.00103 | -3E-05  | 0.00029 | 0.0017  | 0.00058 |
| 4.7E-06 | 0.00052 | -0.0003 | 5.7E-05 | 0.00228 | -0.0002 |
| 4.7E-06 | 0.00027 | 0.00074 | 0.00023 | 0.00191 | 0.00021 |
| 4.7E-06 | 0.00044 | -0.0003 | -0.0007 | 0.00149 | 0.00012 |
| 4.8E-06 | 0.00077 | 0.0008  | 0.00073 | 0.00226 | 0.00031 |
| 4.8E-06 | 0.00021 | 0.00049 | 0.00095 | 0.00186 | 0.00057 |
| 4.8E-06 | 0.00014 | 0.00055 | -0.0005 | 0.00199 | 0.00091 |
| 4.9E-06 | 0.00044 | 0.0012  | 0.00037 | 0.0019  | 0.00137 |
| 4.9E-06 | 0.00044 | 0.00111 | 0.00026 | 0.00195 | 0.00093 |
| 4.9E-06 | 0.00023 | 0.00086 | 9.6E-05 | 0.00153 | 0.00042 |
| 5E-06   | 0.00074 | 0.00029 | 0.00031 | 0.00121 | -0.0003 |
| 5E-06   | -1E-04  | 0.00014 | 0.00031 | 0.00203 | 0.00096 |
| 5E-06   | 0.00092 | 7.1E-06 | -0.0002 | 0.00292 | 0.00023 |
| 5.1E-06 | 0.00139 | 0.00019 | -0.0005 | 0.00127 | 0.00071 |
| 5.1E-06 | -0.0001 | 0.00058 | 0.00023 | 0.00184 | -0.0001 |
| 5.1E-06 | 2.9E-05 | 0.00043 | 0.00072 | 0.00238 | 0.00033 |
| 5.2E-06 | 0.00074 | -0.0002 | 0.00075 | 0.00277 | 0.00075 |
| 5.2E-06 | 0.00039 | -0.0001 | 0.00031 | 0.00213 | 0.00098 |
| 5.2E-06 | -0.0003 | 0.00024 | -8E-05  | 0.00176 | 0.00115 |
| 5.2E-06 | 0.00064 | 0.00039 | -0.0002 | 0.00209 | -0.0005 |
| 5.3E-06 | 0.00082 | 0.00048 | -6E-06  | 0.00198 | -0.0001 |
| 5.3E-06 | 0.00096 | 0.00038 | 0.00024 | 0.00259 | 0.00017 |
| 5.3E-06 | 0.00063 | 0.00054 | 0.00016 | 0.00105 | -0.0003 |
| 5.4E-06 | 6.7E-05 | -0.0004 | -0.0005 | 0.00159 | 0.00151 |
| 5.4E-06 | 0.00019 | 0.00044 | -0.0005 | 0.0011  | -0.0001 |
| 5.4E-06 | 0.0008  | -0.0003 | -0.0004 | 0.00262 | 0.00036 |
| 5.5E-06 | 0.00058 | 0.00041 | -0.0003 | 0.00188 | 0.00115 |
| 5.5E-06 | 0.0009  | -8E-05  | 7E-05   | 0.00258 | 0.00073 |
| 5.5E-06 | 0.00079 | -0.0008 | 0.00033 | 0.00174 | 0.00065 |
| 5.6E-06 | 0.0011  | -6E-05  | 0.00011 | 0.00185 | 0.00098 |
| 5.6E-06 | 0.00052 | -0.0002 | 3.4E-05 | 0.00145 | 0.00043 |
| 5.6E-06 | 0.00012 | -5E-05  | -8E-05  | 0.00175 | 0.00059 |
| 5.7E-06 | -0.0003 | 0.00078 | -0.0002 | 0.00146 | -0.0005 |
| 5.7E-06 | 0.00048 | 0.00105 | 0.00055 | 0.00114 | -7E-05  |
| 5.7E-06 | 0.00042 | 0.00055 | 0.00017 | 0.00194 | 0.00032 |

|         |         |         |         |         |         |
|---------|---------|---------|---------|---------|---------|
| 5.8E-06 | -0.0003 | 0.00025 | -8E-05  | 0.00241 | 0.00017 |
| 5.8E-06 | 0.00036 | 0.00028 | -0.0002 | 0.00162 | 0.00061 |
| 5.8E-06 | 0.00016 | -0.0002 | 0.00043 | 0.00232 | 0.00067 |
| 5.9E-06 | 0.00044 | 0.00011 | -0.0003 | 0.0023  | 0.00079 |
| 5.9E-06 | 0.00015 | 0.00024 | 0.00031 | 0.00179 | 0.00087 |
| 5.9E-06 | 0.00036 | 0.0006  | 3.2E-05 | 0.00111 | 0.00055 |
| 6E-06   | 0.00079 | 3.5E-06 | 0.00014 | 0.00173 | 0.00029 |
| 6E-06   | -3E-05  | -0.0005 | 0.00066 | 0.00173 | 0.00039 |
| 6E-06   | 0.00017 | -1E-04  | 4.2E-05 | 0.00186 | 0.00097 |
| 6E-06   | 0.00044 | 0.00046 | 7.1E-05 | 0.00108 | -0.0001 |
| 6.1E-06 | 0.00035 | 0.00018 | 0.00045 | 0.00171 | 0.00074 |
| 6.1E-06 | 0.00077 | 0.00043 | 0.00035 | 0.00103 | 0.00118 |
| 6.1E-06 | 0.00123 | -1E-04  | 0.00064 | 0.00147 | 0.00121 |
| 6.2E-06 | 0.00016 | 0.00092 | 3.1E-06 | 0.00179 | 0.00029 |
| 6.2E-06 | 0.00017 | 0.00041 | -7E-05  | 0.00142 | 0.00049 |
| 6.2E-06 | 0.00019 | 0.00038 | -7E-05  | 0.00208 | 0.0004  |
| 6.3E-06 | -0.0001 | 0.0004  | -4E-05  | 0.00122 | 0.00074 |
| 6.3E-06 | 0.0003  | 0.00026 | -0.0005 | 0.00174 | -0.0001 |
| 6.3E-06 | 0.00067 | 0.00072 | -0.0002 | 0.002   | 0.00036 |
| 6.4E-06 | 0.00045 | 0.0004  | -0.0004 | 0.00128 | 0.00042 |
| 6.4E-06 | 0.00074 | 0.00019 | 0.00048 | 0.00121 | 0.00129 |
| 6.4E-06 | -0.0005 | 0.0006  | -0.0004 | 0.00161 | 0.00061 |
| 6.5E-06 | 0.00064 | 0.00027 | -0.0004 | 0.00209 | 0.00074 |
| 6.5E-06 | -3E-05  | 0.00056 | -0.0003 | 0.00195 | 0.00063 |
| 6.5E-06 | 0.00085 | 0.00073 | 0.00093 | 0.00155 | 0.00078 |
| 6.6E-06 | 0.00028 | 0.00053 | -0.0001 | 0.00092 | 0.00058 |
| 6.6E-06 | 0.0004  | -4E-05  | -0.0006 | 0.00243 | 0.00098 |
| 6.6E-06 | 0.00034 | 0.00069 | -0.0003 | 0.00208 | -3E-05  |
| 6.7E-06 | 0.00021 | 0.00052 | -9E-05  | 0.00202 | -0.0004 |
| 6.7E-06 | 0.00018 | -0.0003 | 9.8E-05 | 0.00188 | 0.00022 |
| 6.7E-06 | 0.00098 | -0.0003 | -3E-05  | 0.00198 | 0.0008  |
| 6.8E-06 | 0.00107 | 0.00013 | -0.0002 | 0.0019  | 0.00096 |
| 6.8E-06 | -6E-05  | -0.0001 | -0.0002 | 0.00174 | 0.00127 |
| 6.8E-06 | 0.00019 | 0.00053 | 0.00035 | 0.00146 | -4E-05  |
| 6.8E-06 | 0.00017 | 0.0002  | 0.0006  | 0.00162 | 0.00099 |
| 6.9E-06 | 0.00031 | -1E-04  | -0.0003 | 0.00276 | 0.00141 |
| 6.9E-06 | -0.0001 | -0.0003 | 0.00027 | 0.00151 | 0.00027 |
| 6.9E-06 | 0.00097 | 0.00017 | -4E-05  | 0.002   | 0.00077 |
| 7E-06   | 0.00045 | 0.00014 | -0.0002 | 0.00215 | 0.00011 |
| 7E-06   | 0.00047 | 0.00029 | -9E-05  | 0.00203 | 0.00039 |
| 7E-06   | 0.00023 | 0.00033 | -2E-05  | 0.0021  | 0.00101 |
| 7.1E-06 | 0.00042 | -0.0002 | -4E-05  | 0.00182 | 0.00048 |
| 7.1E-06 | 0.00072 | -0.0003 | -0.0002 | 0.00186 | 0.00066 |
| 7.1E-06 | 0.00028 | -0.0004 | -0.0005 | 0.00124 | 0.00046 |
| 7.2E-06 | 0.00012 | -4E-05  | -0.0005 | 0.00155 | 0.00033 |
| 7.2E-06 | 0.00067 | -9E-06  | 5.2E-05 | 0.00194 | -0.0003 |
| 7.2E-06 | 0.00065 | -0.0002 | 0.00037 | 0.00185 | 0.00066 |
| 7.3E-06 | 0.00025 | 0.00032 | -0.0003 | 0.00198 | 0.00079 |
| 7.3E-06 | 0.00058 | 2.9E-05 | 0.00017 | 0.00157 | 9.1E-05 |
| 7.3E-06 | 0.00024 | -0.0005 | -0.0001 | 0.00137 | 0.00131 |
| 7.4E-06 | 0.00057 | -0.0001 | 0.00026 | 0.00228 | 0.00066 |
| 7.4E-06 | 0.00093 | -7E-05  | -0.0006 | 0.00176 | 0.00051 |
| 7.4E-06 | 0.00016 | -8E-05  | -6E-05  | 0.00128 | 0.00057 |
| 7.5E-06 | 0.00104 | -0.0001 | -0.0006 | 0.00237 | 0.00021 |

|         |         |         |         |         |         |
|---------|---------|---------|---------|---------|---------|
| 7.5E-06 | 0.0008  | 7.5E-05 | -0.0003 | 0.00274 | 0.00042 |
| 7.5E-06 | 0.00039 | -0.0003 | -0.0005 | 0.00254 | 0.00073 |
| 7.6E-06 | 0.00057 | 0.0001  | -0.0002 | 0.00184 | 0.00028 |
| 7.6E-06 | 0.00089 | -0.0002 | -0.0005 | 0.00128 | 0.00096 |
| 7.6E-06 | 0.00052 | 0.00033 | -0.0005 | 0.00196 | 0.00093 |
| 7.6E-06 | 0.00058 | -0.0003 | -0.0002 | 0.00108 | 0.00037 |
| 7.7E-06 | -0.0004 | 3.5E-05 | -0.0003 | 0.00186 | 0.00061 |
| 7.7E-06 | 0.00038 | 0.00056 | -0.0002 | 0.00108 | 0.00049 |
| 7.7E-06 | 0.00016 | -0.0002 | -0.0002 | 0.00201 | 0.00032 |
| 7.8E-06 | 0.00106 | -2E-05  | 0.00076 | 0.00186 | 0.00049 |
| 7.8E-06 | 0.00035 | 0.00066 | 5.5E-05 | 0.00161 | 0.00035 |
| 7.8E-06 | -0.0002 | -0.0002 | 2.2E-05 | 0.00127 | 0.00035 |
| 7.9E-06 | -0.0002 | 5.9E-05 | -0.0002 | 0.00168 | 0.00058 |
| 7.9E-06 | 0.00048 | -0.0004 | -0.0003 | 0.00108 | 0.00046 |
| 7.9E-06 | 0.00063 | -4E-05  | 0.00016 | 0.00186 | 0.00083 |
| 8E-06   | 0.00065 | -0.0006 | -2E-05  | 0.00223 | 0.00049 |
| 8E-06   | 0.00058 | 0.00029 | -2E-05  | 0.00178 | 0.00052 |
| 8E-06   | 0.00013 | -6E-05  | -0.001  | 0.00217 | 3.8E-06 |
| 8.1E-06 | 0.00023 | -1E-05  | -0.0001 | 0.00131 | 0.0005  |
| 8.1E-06 | 0.00059 | -0.0002 | 0.00038 | 0.0018  | 0.00022 |
| 8.1E-06 | 7E-05   | 0.00053 | -0.0006 | 0.00193 | 0.00039 |
| 8.2E-06 | -0.0001 | 0.00015 | -0.0003 | 0.00213 | 0.00086 |
| 8.2E-06 | 1.5E-05 | -0.0005 | 2.2E-05 | 0.00159 | 5.9E-05 |
| 8.2E-06 | -2E-06  | -0.0002 | 0.00017 | 0.00173 | 0.0004  |
| 8.3E-06 | 0.00047 | -0.0004 | -0.0002 | 0.00155 | 3.7E-05 |
| 8.3E-06 | -0.0008 | 3.7E-05 | 7.4E-05 | 0.00162 | 0.00046 |
| 8.3E-06 | 0.00052 | 6.5E-05 | -0.0004 | 0.00105 | 0.00031 |
| 8.4E-06 | 0.0002  | -0.0004 | 0.00052 | 0.00151 | 0.00019 |
| 8.4E-06 | -2E-05  | -0.0002 | -0.0005 | 0.00151 | 0.00025 |
| 8.4E-06 | 0.00028 | -8E-05  | -0.0003 | 0.00137 | 0.00039 |
| 8.4E-06 | 0.00018 | -0.0002 | 0.0002  | 0.00214 | 0.00063 |
| 8.5E-06 | 0.0011  | 0.00029 | 0.00011 | 0.00181 | 0.00099 |
| 8.5E-06 | -0.0003 | 0.00012 | -0.0001 | 0.00171 | 0.00028 |
| 8.5E-06 | 6.3E-06 | -3E-05  | -0.0001 | 0.00143 | 0.00094 |
| 8.6E-06 | 0.00033 | 0.00026 | -0.0004 | 0.00192 | 0.00039 |
| 8.6E-06 | 0.0003  | -6E-05  | -0.0003 | 0.00174 | 0.00073 |
| 8.6E-06 | 0.00035 | 0.00012 | -0.0002 | 0.00135 | 0.00026 |
| 8.7E-06 | 0.00018 | 0.00038 | -0.0003 | 0.00207 | 0.00049 |
| 8.7E-06 | -9E-05  | 0.00026 | -0.0005 | 0.00204 | 0.00069 |
| 8.7E-06 | 0.00023 | 0.00027 | -8E-05  | 0.00128 | 0.00058 |
| 8.8E-06 | 0.00019 | 7.4E-05 | -0.0005 | 0.00181 | 0.00048 |
| 8.8E-06 | 0.00028 | -0.0002 | 3.1E-05 | 0.00137 | 5.2E-05 |
| 8.8E-06 | 0.00091 | 0.00055 | -0.0001 | 0.00213 | -6E-05  |
| 8.9E-06 | 0.00015 | -0.0003 | -0.0003 | 0.0021  | 0.00014 |
| 8.9E-06 | 0.00098 | 0.0008  | -0.0004 | 0.00141 | 0.00102 |
| 8.9E-06 | 0.00105 | 0.00055 | -0.0001 | 0.00222 | -6E-05  |
| 9E-06   | 0.00159 | 0.00062 | -2E-05  | 0.00204 | 0.00055 |
| 9E-06   | 6.1E-05 | 5.3E-06 | 0.00042 | 0.00165 | 0.00022 |
| 9E-06   | 0.00037 | 0.00045 | -0.0004 | 0.00177 | 0.00024 |
| 9.1E-06 | 0.00049 | -0.0001 | -0.0001 | 0.00259 | 0.00048 |
| 9.1E-06 | 0.00067 | 2.7E-05 | -0.0002 | 0.0019  | 0.00019 |
| 9.1E-06 | 0.00036 | -0.0006 | -0.0002 | 0.00126 | 0.0003  |
| 9.2E-06 | 0.0002  | 0.00036 | 0.00033 | 0.00106 | 0.00013 |
| 9.2E-06 | 0.00023 | 0.00022 | 0.00016 | 0.00255 | 0.00081 |

|         |         |         |         |         |         |
|---------|---------|---------|---------|---------|---------|
| 9.2E-06 | 0.00069 | 0.00098 | -0.0007 | 0.00212 | 0.0004  |
| 9.2E-06 | 0.00087 | 0.00063 | -0.0005 | 0.00175 | 0.00067 |
| 9.3E-06 | 0.00054 | 0.00067 | -0.0001 | 0.00158 | 0.00019 |
| 9.3E-06 | 0.00021 | 0.00041 | -8E-05  | 0.00171 | 0.00043 |
| 9.3E-06 | 1.1E-05 | 2.2E-05 | 6.8E-06 | 0.00236 | 6.5E-05 |
| 9.4E-06 | 0.00033 | 0.00016 | -0.0006 | 0.00134 | 0.0003  |
| 9.4E-06 | 0.0003  | 0.00035 | -0.0009 | 0.00221 | 0.00019 |
| 9.4E-06 | 0.0004  | -0.0006 | -0.0003 | 0.00149 | 0.00019 |
| 9.5E-06 | 0.0007  | 0.00086 | -0.0002 | 0.00184 | 0.00053 |
| 9.5E-06 | 0.00081 | 0.00044 | 0.00034 | 0.00169 | 0.00073 |
| 9.5E-06 | 0.00071 | 2.5E-06 | -0.0006 | 0.00201 | -0.0005 |
| 9.6E-06 | 0.0001  | 9.6E-05 | -8E-05  | 0.002   | 0.00041 |
| 9.6E-06 | 0.00063 | -0.0004 | -9E-05  | 0.00164 | 0.00067 |
| 9.6E-06 | 0.00019 | 0.00086 | -7E-05  | 0.00119 | 0.00012 |
| 9.7E-06 | 0.00029 | 5.6E-05 | -0.0004 | 0.00164 | 0.00044 |
| 9.7E-06 | 0.00036 | -0.0002 | -0.0008 | 0.00207 | -0.0003 |
| 9.7E-06 | 0.0006  | 0.00073 | -0.0006 | 0.00164 | 0.00062 |
| 9.8E-06 | 0.00036 | 0.00035 | -0.0001 | 0.00144 | 0.00044 |
| 9.8E-06 | 0.00016 | 0.00051 | -0.0003 | 0.00199 | 0.00082 |
| 9.8E-06 | 0.00043 | 0.00016 | 0.0003  | 0.00167 | 0.00059 |
| 9.9E-06 | 0.00108 | -0.0003 | -0.0003 | 0.00115 | 0.00031 |
| 9.9E-06 | 0.00047 | -0.0003 | -0.0008 | 0.00156 | -0.0002 |
| 9.9E-06 | 0.00024 | 0.00024 | -0.0004 | 0.00162 | -4E-05  |
| 1E-05   | 0.00041 | -4E-06  | -0.0001 | 0.00166 | 0.00073 |
| 1E-05   | 0.00041 | 6.9E-05 | -0.0002 | 0.00128 | 0.00055 |
| 1E-05   | 0.00087 | -0.0003 | -0.0005 | 0.00189 | 0.00035 |
| 1E-05   | 0.0009  | 0.00017 | -0.0002 | 0.00167 | 0.00045 |
| 1E-05   | 0.00131 | -0.0001 | -0.0002 | 0.0023  | 0.00026 |
| 1E-05   | 0.00017 | 0.00034 | 0.0004  | 0.00197 | 0.00011 |
| 1E-05   | 0.00078 | 0.00032 | -1E-05  | 0.00126 | -0.0002 |
| 1E-05   | 0.00019 | 0.00018 | -0.0002 | 0.00114 | 0.00025 |
| 1E-05   | 0.00072 | 0.00062 | -0.0004 | 0.00185 | 0.00039 |
| 1E-05   | -1E-05  | 0.00072 | -0.0004 | 0.0016  | 0.00064 |
| 1E-05   | 0.00034 | 0.00039 | 0.00036 | 0.00162 | -0.0003 |
| 1E-05   | -8E-05  | -2E-05  | -0.0003 | 0.00205 | -0.0001 |
| 1E-05   | 0.00114 | 0.00061 | 0.0003  | 0.00164 | 0.00048 |
| 1E-05   | 0.00093 | -4E-05  | -0.0007 | 0.00207 | 0.00018 |
| 1E-05   | 0.00053 | -8E-05  | -0.0001 | 0.00227 | 7E-05   |
| 1E-05   | -0.0003 | 0.00018 | -0.0003 | 0.00105 | 0.00019 |
| 1E-05   | 0.00095 | 0.00055 | -0.0002 | 0.00167 | 0.0004  |
| 1.1E-05 | 0.00045 | 0.00015 | 0.00043 | 0.00127 | 0.00027 |
| 1.1E-05 | -0.0001 | 0.00088 | -0.0004 | 0.00147 | 0.00051 |
| 1.1E-05 | 0.0005  | 0.00029 | -0.0004 | 0.00167 | -0.0001 |
| 1.1E-05 | 0.00049 | -7E-05  | 0.00043 | 0.00132 | 0.00021 |
| 1.1E-05 | 0.00038 | -0.0002 | -1E-04  | 0.00156 | -0.0002 |
| 1.1E-05 | 0.0007  | -0.0001 | -0.0003 | 0.00196 | 0.00024 |
| 1.1E-05 | 0.00104 | 0.00041 | -0.0004 | 0.00127 | 0.00013 |
| 1.1E-05 | 0.00023 | 0.00024 | -0.0003 | 0.00162 | 0.00048 |
| 1.1E-05 | 0.00037 | -0.0008 | 0.00056 | 0.0016  | 0.00045 |
| 1.1E-05 | 0.00031 | -0.0003 | -0.0002 | 0.00128 | 0.00088 |
| 1.1E-05 | 0.0004  | 2.7E-05 | 0.00013 | 0.00164 | 0.00052 |
| 1.1E-05 | 0.00063 | 0.00014 | -6E-05  | 0.00196 | 0.00062 |
| 1.1E-05 | 0.00059 | 0.00035 | 0.0004  | 0.00185 | 0.00064 |
| 1.1E-05 | -0.0003 | 0.00045 | -0.0002 | 0.00149 | 0.00079 |

|         |         |         |         |         |         |
|---------|---------|---------|---------|---------|---------|
| 1.1E-05 | 0.00074 | 0.00026 | 0.00021 | 0.00147 | 0.00059 |
| 1.1E-05 | 0.00075 | -0.0002 | 1.3E-05 | 0.00207 | 0.00023 |
| 1.1E-05 | -0.0004 | 0.00076 | -0.0006 | 0.00227 | 0.00024 |
| 1.1E-05 | 0.00021 | 0.00064 | -0.0005 | 0.00116 | -3E-05  |
| 1.1E-05 | 0.00029 | 0.00077 | -0.0005 | 0.00178 | 0.00048 |
| 1.1E-05 | 0.0002  | 0.00056 | -0.0002 | 0.0021  | -4E-05  |
| 1.1E-05 | -0.0003 | 0.00034 | -0.0006 | 0.00221 | 0.00067 |
| 1.1E-05 | -0.0002 | 0.00043 | -0.0004 | 0.00201 | 0.00056 |
| 1.1E-05 | -4E-05  | 0.00036 | 0.00011 | 0.00175 | 0.00017 |
| 1.1E-05 | 0.00011 | 0.00037 | 0.00044 | 0.00183 | -0.0001 |
| 1.1E-05 | 1.9E-05 | 0.00047 | -0.0003 | 0.00154 | 0.0004  |
| 1.1E-05 | 0.00027 | -0.0002 | 5.1E-05 | 0.00159 | 0.00025 |
| 1.1E-05 | 8.1E-05 | 0.00024 | -0.0005 | 0.0014  | 0.00012 |
| 1.1E-05 | 0.00045 | 7.8E-05 | -0.0001 | 0.00133 | 1E-04   |
| 1.1E-05 | 0.00012 | 0.00053 | -0.0006 | 0.00095 | 0.00052 |
| 1.1E-05 | -0.0003 | -0.0008 | -0.0002 | 0.00135 | 0.00011 |
| 1.1E-05 | -1E-05  | 0.00015 | 7.8E-05 | 0.00133 | 5.8E-05 |
| 1.1E-05 | 0.0002  | 0.00011 | -0.0006 | 0.00173 | -7E-05  |
| 1.2E-05 | 0.00046 | 0.0012  | -0.0006 | 0.00205 | 0.0002  |
| 1.2E-05 | 3.5E-05 | -2E-05  | -0.0004 | 0.00121 | 0.00019 |
| 1.2E-05 | 0.00036 | -1E-05  | -0.0002 | 0.00184 | 0.00058 |
| 1.2E-05 | 0.00018 | 0.00062 | -0.0004 | 0.00152 | 0.00014 |
| 1.2E-05 | -0.0008 | 9.4E-05 | -0.0002 | 0.00157 | -0.0003 |
| 1.2E-05 | 0.00066 | -0.0003 | 0.0003  | 0.00169 | 0.00052 |
| 1.2E-05 | 3.6E-05 | 0.00055 | -0.0003 | 0.00191 | 0.0006  |
| 1.2E-05 | 0.00035 | 0.00037 | -0.0004 | 0.00168 | 0.00013 |
| 1.2E-05 | 0.0005  | 0.00018 | -0.0002 | 0.00217 | 0.00043 |
| 1.2E-05 | 0.00076 | 0.00046 | -0.0002 | 0.00203 | 5.2E-05 |
| 1.2E-05 | -0.0005 | 0.00054 | -0.0007 | 0.00161 | 0.00047 |
| 1.2E-05 | 0.00049 | 0.00105 | -0.0004 | 0.00156 | -0.0003 |
| 1.2E-05 | 0.00053 | 0.00034 | -0.0004 | 0.00135 | 0.00032 |
| 1.2E-05 | 0.00032 | -6E-06  | -0.0005 | 0.00144 | 0.00017 |
| 1.2E-05 | 1.8E-05 | 5.8E-05 | -0.0005 | 0.00134 | 0.00044 |
| 1.2E-05 | -0.0002 | 1.6E-05 | -0.0002 | 0.0008  | 0.00017 |
| 1.2E-05 | -0.0001 | -0.0004 | -0.0004 | 0.00159 | 0.00015 |
| 1.2E-05 | 0.00108 | -0.0004 | -0.0003 | 0.00182 | -5E-05  |
| 1.2E-05 | -0.0002 | -2E-06  | -2E-05  | 0.0015  | 0.00033 |
| 1.2E-05 | 0.00073 | -0.0003 | -3E-05  | 0.00194 | 0.00042 |
| 1.2E-05 | 0.00031 | -0.0002 | 0.00011 | 0.0022  | 5.5E-05 |
| 1.2E-05 | 0.0001  | 0.00056 | -0.0006 | 0.00159 | 0.00046 |
| 1.2E-05 | 0.00024 | 0.00034 | -7E-06  | 0.00175 | 0.00027 |
| 1.2E-05 | 0.00043 | 0.00086 | -0.0008 | 0.00183 | 0.00044 |
| 1.2E-05 | 0.00029 | 9.5E-06 | -0.0004 | 0.00087 | 0.00018 |
| 1.2E-05 | 8.3E-05 | 0.0009  | -0.0006 | 0.00094 | 0.00032 |
| 1.2E-05 | 0.00062 | 0.00016 | 0.00028 | 0.00162 | 0.00036 |
| 1.2E-05 | 0.00065 | 0.00063 | -0.0006 | 0.00191 | -3E-05  |
| 1.2E-05 | 0.00028 | 0.00014 | -0.0002 | 0.00157 | -0.0001 |
| 1.2E-05 | 0.00042 | -0.0006 | -0.0003 | 0.00175 | 0.00032 |
| 1.2E-05 | 0.0003  | 0.00086 | -0.0005 | 0.00174 | 4.2E-05 |
| 1.3E-05 | 0.00062 | -0.001  | -0.0005 | 0.00224 | 0.00017 |
| 1.3E-05 | 0.00084 | -7E-05  | 0.00019 | 0.00114 | 5.5E-05 |
| 1.3E-05 | 0.00038 | 0.0002  | -0.0009 | 0.00273 | 0.00037 |
| 1.3E-05 | -4E-05  | 0.00032 | -0.0005 | 0.00146 | 0.00031 |
| 1.3E-05 | 0.00068 | 0.0005  | -0.0006 | 0.00157 | -0.0004 |

|         |         |         |         |         |         |
|---------|---------|---------|---------|---------|---------|
| 1.3E-05 | -2E-05  | 9.6E-05 | -0.0007 | 0.00175 | -0.0003 |
| 1.3E-05 | 0.00033 | 0.0009  | -0.0005 | 0.0018  | 0.00048 |
| 1.3E-05 | 0.00054 | -0.0002 | 1.9E-05 | 0.00183 | 0.0002  |
| 1.3E-05 | 0.00042 | -0.0002 | -0.0012 | 0.00177 | 0.00038 |
| 1.3E-05 | 0.00041 | 0.00015 | -0.0008 | 0.00128 | 0.00072 |
| 1.3E-05 | -0.0001 | 0.00051 | -0.0004 | 0.00166 | 0.00047 |
| 1.3E-05 | 0.00081 | 0.00028 | -0.0002 | 0.00153 | 0.00021 |
| 1.3E-05 | -0.0002 | 0.00073 | -0.0003 | 0.00183 | 8.4E-05 |
| 1.3E-05 | -0.0004 | -9E-05  | -0.0003 | 0.00121 | 0.00068 |
| 1.3E-05 | 0.00023 | 0.0005  | -7E-05  | 0.00161 | 7.5E-05 |
| 1.3E-05 | 5.2E-05 | -8E-05  | -1E-05  | 0.0017  | 0.00012 |
| 1.3E-05 | 1.9E-05 | 0.00071 | 0.00041 | 0.00153 | -0.0007 |
| 1.3E-05 | -7E-05  | 0.00066 | -0.0005 | 0.00129 | 0.00022 |
| 1.3E-05 | 0.00034 | 0.00063 | 7.2E-06 | 0.00151 | 0.0006  |
| 1.3E-05 | 0.00061 | 0.00012 | -0.0003 | 0.00179 | 0.00045 |
| 1.3E-05 | -8E-05  | 0.00017 | -6E-05  | 0.00142 | 0.00019 |
| 1.3E-05 | 6.1E-05 | -2E-05  | -3E-05  | 0.00085 | -7E-05  |
| 1.3E-05 | -0.0002 | 0.00016 | -0.0005 | 0.00173 | -3E-05  |
| 1.3E-05 | 0.00017 | 0.00085 | -0.0004 | 0.00164 | 0.0003  |
| 1.3E-05 | -0.0003 | 0.00094 | -0.0003 | 0.00156 | -0.0003 |
| 1.3E-05 | -4E-05  | 0.0004  | -0.0002 | 0.00155 | -0.0003 |
| 1.3E-05 | -7E-05  | 0.00108 | -0.0005 | 0.00134 | 0.00064 |
| 1.3E-05 | -0.0001 | 5.4E-05 | -0.0004 | 0.00128 | 0.00024 |
| 1.3E-05 | 0.00015 | 0.00017 | 0.00019 | 0.00164 | 0.00037 |
| 1.3E-05 | -2E-05  | 2.8E-05 | -2E-05  | 0.00137 | 0.00112 |
| 1.3E-05 | 0.00019 | 0.00027 | -0.0003 | 0.00121 | 0.0007  |
| 1.4E-05 | -0.0001 | -0.0004 | -0.0002 | 0.002   | -9E-05  |
| 1.4E-05 | 0.00019 | 0.00071 | 0.00039 | 0.00175 | 4.3E-05 |
| 1.4E-05 | 0.00013 | 0.00023 | -0.0003 | 0.00198 | 0.00054 |
| 1.4E-05 | -0.0001 | 0.00065 | -0.0007 | 0.0016  | 0.00062 |
| 1.4E-05 | 7.3E-05 | 0.00069 | -0.0006 | 0.00115 | 0.00078 |
| 1.4E-05 | -0.0001 | 0.00019 | -0.0004 | 0.0023  | 0.00105 |
| 1.4E-05 | 0.00091 | -8E-06  | 9.4E-06 | 0.00145 | 0.00044 |
| 1.4E-05 | 0.00048 | 0.00094 | -0.0005 | 0.00134 | 0.00042 |
| 1.4E-05 | 0.00063 | 0.00016 | -0.0002 | 0.00179 | 0.00017 |
| 1.4E-05 | 0.00038 | 0.00011 | -0.0008 | 0.00156 | 0.00012 |
| 1.4E-05 | 0.00037 | 0.00049 | -0.0009 | 0.00107 | -0.0002 |
| 1.4E-05 | -4E-05  | 0.00065 | -0.0002 | 0.00122 | -0.0002 |
| 1.4E-05 | 0.001   | 0.00079 | -0.0011 | 0.00099 | 0.0004  |
| 1.4E-05 | 0.00033 | 0.00014 | 0.00013 | 0.00157 | 0.00012 |
| 1.4E-05 | -0.0001 | 0.0004  | 0.00024 | 0.00161 | 0.00028 |
| 1.4E-05 | -0.0002 | 0.00067 | 1.4E-05 | 0.00173 | 6.1E-05 |
| 1.4E-05 | 0.00022 | 0.00034 | -0.0008 | 0.00173 | -5E-05  |
| 1.4E-05 | 0.00016 | 0.00101 | -5E-05  | 0.00124 | 0.00028 |
| 1.4E-05 | 0.00012 | 7.5E-05 | -8E-05  | 0.00193 | -3E-05  |
| 1.4E-05 | 0.0007  | 0.00071 | 4.9E-05 | 0.00148 | 0.00036 |
| 1.4E-05 | 0.0005  | 0.00036 | -0.0004 | 0.00133 | 0.00014 |
| 1.4E-05 | -0.0003 | 0.00057 | -0.0004 | 0.00129 | 0.00025 |
| 1.4E-05 | -0.0002 | 0.00011 | -0.0005 | 0.00116 | -0.0005 |
| 1.4E-05 | 6.8E-05 | -0.0001 | -8E-05  | 0.00172 | -0.0001 |
| 1.4E-05 | 0.00034 | 0.00022 | -0.0005 | 0.00138 | 0.00028 |
| 1.4E-05 | 0.00023 | 0.00041 | -0.0003 | 0.00195 | -0.0003 |
| 1.4E-05 | 0.00036 | 0.00031 | -0.0004 | 0.00191 | -3E-05  |
| 1.4E-05 | -0.0001 | 0.00095 | -0.0001 | 0.00133 | 0.00017 |



|         |         |         |         |         |         |
|---------|---------|---------|---------|---------|---------|
| 1.4E-05 | 0.00041 | 0.00049 | -0.0008 | 0.00186 | -0.0004 |
| 1.4E-05 | -8E-05  | -3E-05  | -0.0004 | 0.0013  | 0.00036 |
| 1.4E-05 | -0.0003 | 0.0008  | 0.00069 | 0.00117 | -8E-05  |
| 1.5E-05 | 0.00016 | 0.00093 | -0.0003 | 0.00207 | 0.00052 |
| 1.5E-05 | -0.0004 | -9E-05  | -5E-05  | 0.00212 | 0.00127 |
| 1.5E-05 | -0.0002 | 0.00104 | 0.00076 | 0.00203 | -0.0009 |
| 1.5E-05 | 0.00039 | 0.00122 | -0.0002 | 0.00149 | 0.00023 |
| 1.5E-05 | -0.0002 | -5E-05  | -0.0004 | 0.00201 | -0.0007 |
| 1.5E-05 | -1E-05  | -0.0003 | -0.0006 | 0.00188 | -0.0003 |
| 1.5E-05 | 0.00068 | -0.0003 | -3E-05  | 0.00203 | -0.0001 |
| 1.5E-05 | 0.00017 | 0.00089 | 2.3E-05 | 0.00232 | -0.0004 |
| 1.5E-05 | -0.0002 | 0.0004  | -0.0003 | 0.00149 | 0.00039 |
| 1.5E-05 | -0.0004 | 0.00018 | -0.0003 | 0.00186 | 0.0009  |
| 1.5E-05 | 0.0003  | 0.00056 | -0.0007 | 0.00189 | -3E-05  |
| 1.5E-05 | -4E-05  | -2E-05  | -5E-05  | 0.00133 | 0.00048 |
| 1.5E-05 | -0.0001 | -0.0001 | -0.0004 | 0.00173 | 0.00035 |
| 1.5E-05 | 0.00033 | 0.00033 | -0.0005 | 0.00142 | -0.0004 |
| 1.5E-05 | 3.9E-05 | -0.0002 | 0.00071 | 0.00141 | -2E-05  |
| 1.5E-05 | 0.00017 | 4.2E-05 | 0.0007  | 0.00109 | 1.1E-05 |

**Table SI.7:** Primary kinetic data for the reaction of 1-phenyl-2-pyrrolidone (**S7**) with CumO• generated by 355 nm LFP in MeCN (**Figure SI.7**).

| t / s   | $\Delta A$ 1-phenyl-2-pyrrolidone ( <b>S7</b> ) |               |               |               |               |
|---------|-------------------------------------------------|---------------|---------------|---------------|---------------|
|         | <b>0.080M</b>                                   | <b>0.235M</b> | <b>0.400M</b> | <b>0.592M</b> | <b>0.799M</b> |
| -1E-06  | -0.0007                                         | 0.00085       | 0.00018       | -0.0003       | -0.0004       |
| -1E-06  | -0.0009                                         | 0.00166       | -0.0007       | 0.00131       | -0.0008       |
| -9E-07  | -0.0006                                         | 0.00053       | -0.0007       | 0.00052       | 1.6E-05       |
| -9E-07  | -0.0005                                         | 0.0014        | -0.0004       | 0.0008        | 0.00052       |
| -9E-07  | 9.5E-05                                         | 0.00049       | -0.0005       | 0.00023       | -0.0004       |
| -8E-07  | -0.0004                                         | -0.0001       | -0.0011       | 0.0008        | 0.0006        |
| -8E-07  | -0.0002                                         | 0.00017       | -0.0009       | 0.00033       | -0.0003       |
| -8E-07  | -0.0007                                         | 0.00049       | -0.0005       | 0.00092       | -0.0002       |
| -7E-07  | -0.0005                                         | 4.2E-05       | -0.0004       | 0.00084       | -0.0005       |
| -7E-07  | -0.0002                                         | 0.00045       | -0.0001       | 0.00019       | -0.0003       |
| -7E-07  | 0.00086                                         | 0.00039       | -0.0003       | 0.00102       | -0.0006       |
| -6E-07  | 7E-05                                           | 0.00106       | -0.0008       | 0.0008        | -0.0004       |
| -6E-07  | 0.00019                                         | 0.0007        | -0.0006       | 0.00073       | -0.0003       |
| -6E-07  | -0.0004                                         | 0.00109       | -0.0005       | 0.00039       | -0.0004       |
| -5E-07  | 0.00033                                         | 0.00048       | -0.0012       | 0.00061       | -0.0004       |
| -5E-07  | -0.0002                                         | 0.00206       | -0.0001       | 0.00063       | -0.0016       |
| -5E-07  | 0.00033                                         | -0.0004       | -0.0004       | 0.00053       | -0.0008       |
| -4E-07  | -0.0001                                         | 0.0015        | -0.0003       | 0.00079       | -0.0004       |
| -4E-07  | -0.0005                                         | 0.00061       | -0.0006       | 0.00094       | -0.0005       |
| -4E-07  | -0.0012                                         | 0.0013        | -0.0007       | 0.00085       | -0.0008       |
| -4E-07  | -0.0003                                         | 0.00089       | -0.0006       | 0.00078       | -0.0006       |
| -3E-07  | -0.0005                                         | 0.00029       | -0.001        | 0.00038       | -0.0003       |
| -3E-07  | 0.00022                                         | 0.00059       | -0.0007       | 0.00058       | -0.0005       |
| -3E-07  | -0.0006                                         | 0.00078       | -0.0001       | 0.00154       | -0.0009       |
| -2E-07  | -0.0003                                         | 0.00089       | 0.00063       | 0.00086       | -0.0002       |
| -2E-07  | 3.8E-05                                         | 0.00139       | -0.0011       | 0.00063       | -0.0006       |
| -2E-07  | -2E-05                                          | 0.00151       | -0.0004       | 0.00113       | -0.0005       |
| -1E-07  | -0.0006                                         | 0.00072       | 0.00025       | 0.00051       | -0.0007       |
| -1E-07  | 0.00013                                         | 0.00085       | -0.0006       | 0.00109       | -5E-05        |
| -6E-08  | 0.00061                                         | 0.00057       | -0.0002       | 0.00064       | -0.0005       |
| -3E-08  | 0.00038                                         | 0.00073       | -0.0003       | 0.00104       | 0.00015       |
| -4E-10  | -0.0033                                         | -0.0029       | -0.0036       | -0.0022       | -0.0039       |
| 3.2E-08 | -0.0084                                         | -0.0097       | -0.0143       | -0.0119       | -0.0139       |
| 6.4E-08 | 0.01511                                         | 0.01743       | 0.01654       | 0.01691       | 0.016         |
| 9.6E-08 | 0.01523                                         | 0.01783       | 0.01685       | 0.01884       | 0.01753       |
| 1.3E-07 | 0.0144                                          | 0.01741       | 0.01558       | 0.01671       | 0.0154        |
| 1.6E-07 | 0.01345                                         | 0.01628       | 0.01432       | 0.01519       | 0.01486       |
| 1.9E-07 | 0.01276                                         | 0.01521       | 0.0136        | 0.01487       | 0.01359       |
| 2.2E-07 | 0.01219                                         | 0.01462       | 0.01245       | 0.01441       | 0.01298       |
| 2.6E-07 | 0.01269                                         | 0.01506       | 0.01217       | 0.01391       | 0.01229       |
| 2.9E-07 | 0.01247                                         | 0.01379       | 0.01195       | 0.01247       | 0.01126       |
| 3.2E-07 | 0.01265                                         | 0.0136        | 0.0102        | 0.01225       | 0.01029       |
| 3.5E-07 | 0.01131                                         | 0.01313       | 0.01104       | 0.01075       | 0.00955       |
| 3.8E-07 | 0.01125                                         | 0.01182       | 0.00986       | 0.0108        | 0.0093        |
| 4.2E-07 | 0.01056                                         | 0.01181       | 0.00918       | 0.0104        | 0.00881       |
| 4.5E-07 | 0.01058                                         | 0.01175       | 0.00941       | 0.01007       | 0.00822       |
| 4.8E-07 | 0.0101                                          | 0.01094       | 0.00892       | 0.00843       | 0.00717       |
| 5.1E-07 | 0.01029                                         | 0.00923       | 0.00797       | 0.00857       | 0.00644       |
| 5.4E-07 | 0.00972                                         | 0.01035       | 0.00779       | 0.00835       | 0.00662       |

|         |         |         |         |         |         |
|---------|---------|---------|---------|---------|---------|
| 5.8E-07 | 0.00906 | 0.00941 | 0.00682 | 0.00769 | 0.00619 |
| 6.1E-07 | 0.00832 | 0.00972 | 0.00697 | 0.00736 | 0.00519 |
| 6.4E-07 | 0.00845 | 0.0086  | 0.00702 | 0.00771 | 0.00496 |
| 6.7E-07 | 0.00893 | 0.00854 | 0.00654 | 0.00634 | 0.00517 |
| 7E-07   | 0.00908 | 0.00944 | 0.00569 | 0.00725 | 0.00455 |
| 7.4E-07 | 0.00863 | 0.00825 | 0.00514 | 0.00633 | 0.00395 |
| 7.7E-07 | 0.00716 | 0.00785 | 0.00543 | 0.00591 | 0.00415 |
| 8E-07   | 0.00662 | 0.00807 | 0.00538 | 0.00556 | 0.00412 |
| 8.3E-07 | 0.00726 | 0.00761 | 0.00495 | 0.00511 | 0.00361 |
| 8.6E-07 | 0.00663 | 0.00712 | 0.00401 | 0.00502 | 0.00315 |
| 9E-07   | 0.00625 | 0.00766 | 0.00465 | 0.00452 | 0.0031  |
| 9.3E-07 | 0.00626 | 0.00693 | 0.00483 | 0.00455 | 0.00247 |
| 9.6E-07 | 0.00591 | 0.00681 | 0.00414 | 0.0042  | 0.00257 |
| 9.9E-07 | 0.00665 | 0.00594 | 0.00351 | 0.00416 | 0.0027  |
| 1E-06   | 0.00481 | 0.00591 | 0.00301 | 0.00389 | 0.00271 |
| 1.1E-06 | 0.00598 | 0.00637 | 0.00283 | 0.00382 | 0.00201 |
| 1.1E-06 | 0.0056  | 0.00674 | 0.00341 | 0.00394 | 0.00175 |
| 1.1E-06 | 0.00501 | 0.00603 | 0.00276 | 0.00361 | 0.00169 |
| 1.2E-06 | 0.00546 | 0.00585 | 0.00242 | 0.00378 | 0.00186 |
| 1.2E-06 | 0.00511 | 0.00511 | 0.00258 | 0.00281 | 0.00119 |
| 1.2E-06 | 0.00522 | 0.00563 | 0.00315 | 0.00287 | 0.00107 |
| 1.2E-06 | 0.00497 | 0.00527 | 0.00216 | 0.00261 | 0.00127 |
| 1.3E-06 | 0.00597 | 0.00498 | 0.00277 | 0.00296 | 0.00186 |
| 1.3E-06 | 0.00464 | 0.00529 | 0.00265 | 0.00287 | 0.00105 |
| 1.3E-06 | 0.00433 | 0.00426 | 0.00256 | 0.00279 | 0.00114 |
| 1.4E-06 | 0.00441 | 0.00578 | 0.00148 | 0.0028  | 0.00118 |
| 1.4E-06 | 0.00463 | 0.00484 | 0.00144 | 0.00273 | 0.00149 |
| 1.4E-06 | 0.00485 | 0.00467 | 0.00164 | 0.00303 | 0.00112 |
| 1.5E-06 | 0.00356 | 0.00476 | 0.00136 | 0.00166 | 0.00173 |
| 1.5E-06 | 0.00364 | 0.00505 | 0.00239 | 0.00239 | 0.00188 |
| 1.5E-06 | 0.00387 | 0.00426 | 0.00157 | 0.00246 | 0.00157 |
| 1.6E-06 | 0.00322 | 0.00372 | 0.00233 | 0.00239 | 0.00114 |
| 1.6E-06 | 0.00351 | 0.00397 | 0.00155 | 0.00245 | 0.00111 |
| 1.6E-06 | 0.00338 | 0.00372 | 0.00167 | 0.00224 | 0.00075 |
| 1.7E-06 | 0.00362 | 0.00378 | 0.00094 | 0.0022  | 0.00087 |
| 1.7E-06 | 0.00239 | 0.00379 | 0.00144 | 0.00205 | 0.00055 |
| 1.7E-06 | 0.00307 | 0.00361 | 0.00158 | 0.00161 | 0.00046 |
| 1.8E-06 | 0.00279 | 0.00342 | 0.00067 | 0.00206 | 0.00073 |
| 1.8E-06 | 0.00283 | 0.00366 | 0.00203 | 0.00197 | 0.00141 |
| 1.8E-06 | 0.00227 | 0.00297 | 0.00084 | 0.00215 | 0.00085 |
| 1.9E-06 | 0.00257 | 0.00323 | 0.0012  | 0.00144 | 0.00092 |
| 1.9E-06 | 0.00233 | 0.00318 | 0.00109 | 0.00196 | 0.00021 |
| 1.9E-06 | 0.00242 | 0.00227 | 0.00013 | 0.0025  | 0.00125 |
| 2E-06   | 0.00218 | 0.00312 | 0.00114 | 0.00121 | 0.00101 |
| 2E-06   | 0.00212 | 0.00359 | 0.00063 | 0.00171 | 0.00095 |
| 2E-06   | 0.00254 | 0.00332 | 0.00081 | 0.002   | 0.00123 |
| 2E-06   | 0.00224 | 0.0025  | 0.00065 | 0.0011  | 0.00078 |
| 2.1E-06 | 0.00266 | 0.00326 | 0.00083 | 0.00163 | 0.00091 |
| 2.1E-06 | 0.00183 | 0.00309 | 0.00142 | 0.00176 | -2E-05  |
| 2.1E-06 | 0.00229 | 0.00313 | 0.00074 | 0.00241 | 0.00178 |
| 2.2E-06 | 0.00272 | 0.00343 | 0.00051 | 0.00167 | -0.0002 |
| 2.2E-06 | 0.00228 | 0.00306 | 0.00065 | 0.00203 | 0.00049 |
| 2.2E-06 | 0.00299 | 0.00321 | 0.00122 | 0.00138 | 0.00139 |
| 2.3E-06 | 0.00211 | 0.00219 | 0.00077 | 0.00194 | -5E-05  |

|         |         |         |         |         |         |
|---------|---------|---------|---------|---------|---------|
| 2.3E-06 | 0.00232 | 0.00295 | 0.00066 | 0.0014  | 0.00094 |
| 2.3E-06 | 0.00245 | 0.00193 | 0.00148 | 0.00171 | 0.00103 |
| 2.4E-06 | 0.00249 | 0.00277 | 0.00109 | 0.0018  | -0.0003 |
| 2.4E-06 | 0.00158 | 0.00284 | 0.0012  | 0.00212 | 0.00056 |
| 2.4E-06 | 0.00194 | 0.0036  | 0.00083 | 0.00169 | 0.00166 |
| 2.5E-06 | 0.00199 | 0.00243 | 0.00069 | 0.00229 | 0.00063 |
| 2.5E-06 | 0.00179 | 0.00206 | 0.00037 | 0.00229 | 0.00082 |
| 2.5E-06 | 0.00111 | 0.00276 | 0.00022 | 0.00155 | 0.00115 |
| 2.6E-06 | 0.00222 | 0.00251 | 0.00085 | 0.00203 | 0.00123 |
| 2.6E-06 | 0.00182 | 0.002   | 0.0004  | 0.00159 | -0.0001 |
| 2.6E-06 | 0.00133 | 0.00267 | 0.00051 | 0.00091 | 0.00051 |
| 2.7E-06 | 0.00229 | 0.00258 | 0.00037 | 0.00179 | 0.00153 |
| 2.7E-06 | 0.0021  | 0.00245 | 0.00069 | 0.00089 | -0.0002 |
| 2.7E-06 | 0.0016  | 0.00198 | 0.00037 | 0.00059 | 0.00066 |
| 2.8E-06 | 0.00092 | 0.00204 | 0.00057 | 0.00116 | 0.00093 |
| 2.8E-06 | 0.00191 | 0.00209 | 0.00064 | 0.00127 | -0.0001 |
| 2.8E-06 | 0.0016  | 0.00204 | 0.00099 | 0.0011  | 0.00072 |
| 2.8E-06 | 0.00129 | 0.00215 | 0.00068 | 0.00161 | 0.00058 |
| 2.9E-06 | 0.00203 | 0.00259 | -0.0002 | 0.00112 | 0.00059 |
| 2.9E-06 | 0.00176 | 0.00225 | 0.00091 | 0.00112 | 0.00035 |
| 2.9E-06 | 0.00099 | 0.00217 | 4.4E-05 | 0.00119 | 0.00058 |
| 3E-06   | 0.00128 | 0.00203 | 0.00073 | 0.00116 | 2.1E-05 |
| 3E-06   | 0.00213 | 0.00205 | 1.1E-05 | 0.00174 | 0.0003  |
| 3E-06   | 0.00141 | 0.00142 | 0.00053 | 0.00062 | 0.00067 |
| 3.1E-06 | 0.00192 | 0.00219 | 0.001   | 0.00133 | -8E-05  |
| 3.1E-06 | 0.00172 | 0.00215 | 0.00037 | 0.00144 | 0.00055 |
| 3.1E-06 | 0.00086 | 0.00239 | -0.0002 | 0.0014  | 8.2E-05 |
| 3.2E-06 | 0.00115 | 0.00271 | 0.00014 | 0.0007  | 0.00035 |
| 3.2E-06 | 0.0005  | 0.00289 | -0.0008 | 0.00134 | -0.0004 |
| 3.2E-06 | 0.00066 | 0.00215 | 0.00033 | 0.00175 | 0.00077 |
| 3.3E-06 | 0.00131 | 0.00227 | -0.0005 | 0.00126 | 0.00062 |
| 3.3E-06 | 0.00126 | 0.00184 | -0.0002 | 0.00128 | 0.0003  |
| 3.3E-06 | 0.0013  | 0.00151 | 0.00027 | 0.00122 | 0.00031 |
| 3.4E-06 | 0.00214 | 0.00169 | -0.0003 | 0.00129 | 7.5E-05 |
| 3.4E-06 | 0.00043 | 0.00177 | 0.00082 | 0.00135 | 0.00039 |
| 3.4E-06 | 0.00096 | 0.0013  | -0.0005 | 0.00153 | 0.00085 |
| 3.5E-06 | 0.00159 | 0.00215 | 0.00069 | 0.00186 | 0.00054 |
| 3.5E-06 | 0.00054 | 0.00176 | 0.00021 | 0.00152 | 0.00133 |
| 3.5E-06 | 0.00063 | 0.00137 | 0.00015 | 0.00152 | -0.0002 |
| 3.6E-06 | 0.00135 | 0.00226 | 2.1E-05 | 0.0012  | 0.00027 |
| 3.6E-06 | 0.00038 | 0.00179 | -0.0004 | 0.00099 | 0.00071 |
| 3.6E-06 | 0.00149 | 0.00135 | -2E-05  | 0.00142 | 0.00148 |
| 3.6E-06 | 0.00037 | 0.00139 | -6E-06  | 0.00165 | 0.00033 |
| 3.7E-06 | 0.0006  | 0.00134 | 8.6E-05 | 0.00195 | 0.0001  |
| 3.7E-06 | 0.00051 | 0.00137 | 0.00071 | 0.00101 | 0.00041 |
| 3.7E-06 | 0.00065 | 0.00122 | 0.00074 | 0.00052 | -0.0001 |
| 3.8E-06 | -0.0002 | 0.00108 | 0.00043 | 0.00123 | 0.00025 |
| 3.8E-06 | 0.00043 | 0.00115 | -6E-05  | 0.00099 | -9E-05  |
| 3.8E-06 | 0.00052 | 0.00183 | 0.00048 | 0.00168 | 0.00011 |
| 3.9E-06 | 0.00071 | 0.00121 | -0.0004 | 0.00139 | 0.00103 |
| 3.9E-06 | 7.1E-05 | 0.00126 | -4E-05  | 0.00187 | 0.00066 |
| 3.9E-06 | 0.00061 | 0.00141 | 0.00057 | 0.00138 | -0.0001 |
| 4E-06   | 0.0009  | 0.00169 | -0.0004 | 0.00096 | -0.0003 |
| 4E-06   | 9.7E-05 | 0.002   | 0.00021 | 0.00192 | -0.0002 |

|         |         |         |         |         |         |
|---------|---------|---------|---------|---------|---------|
| 4E-06   | 0.00073 | 0.00196 | -0.0002 | 0.00161 | 0.00011 |
| 4.1E-06 | 0.0011  | 0.00118 | 4.4E-05 | 0.00206 | 0.00036 |
| 4.1E-06 | 0.00063 | 0.00205 | -6E-06  | 0.00134 | 0.00054 |
| 4.1E-06 | 0.00038 | 0.00153 | 0.00024 | 0.00141 | 0.00051 |
| 4.2E-06 | 0.00101 | 0.00137 | 0.00064 | 0.00206 | 0.00059 |
| 4.2E-06 | 0.00109 | 0.00105 | 8.8E-05 | 0.00089 | 0.00119 |
| 4.2E-06 | 8.4E-05 | 0.00251 | 0.00051 | 0.00208 | 0.00016 |
| 4.3E-06 | 0.00023 | 0.0019  | -0.0005 | 0.00131 | 0.0005  |
| 4.3E-06 | 0.00079 | 0.00208 | -7E-05  | 0.00107 | -4E-06  |
| 4.3E-06 | -0.0001 | 0.00117 | 0.00012 | 0.0014  | 0.00072 |
| 4.4E-06 | 0.00111 | 0.00143 | -0.0011 | 0.00114 | 0.00035 |
| 4.4E-06 | 0.00074 | 0.00136 | 9.7E-05 | 0.00111 | 0.00059 |
| 4.4E-06 | 0.00039 | 0.00169 | 3.1E-05 | 0.00157 | 0.00063 |
| 4.4E-06 | 0.0003  | 0.00222 | -0.0002 | 0.00154 | -0.0005 |
| 4.5E-06 | 0.00062 | 0.00148 | -5E-05  | 0.00125 | 0.00082 |
| 4.5E-06 | 0.00054 | 0.00192 | -0.0001 | 0.00087 | 0.00086 |
| 4.5E-06 | -5E-06  | 0.00159 | -1E-04  | 0.00109 | 0.00059 |
| 4.6E-06 | 7.1E-05 | 0.00144 | 2E-05   | 0.00178 | 0.00055 |
| 4.6E-06 | -7E-05  | 0.00159 | -7E-05  | 0.00187 | 0.00067 |
| 4.6E-06 | 0.00081 | 0.00101 | 0.0005  | 0.00113 | 0.00041 |
| 4.7E-06 | -0.0002 | 0.00161 | -0.0001 | 0.00119 | 0.00071 |
| 4.7E-06 | 0.00044 | 0.00139 | 0.00033 | 0.00101 | 0.00071 |
| 4.7E-06 | 0.00042 | 0.0017  | -0.0004 | 0.00049 | 0.00071 |
| 4.8E-06 | -9E-05  | 0.0013  | -0.0005 | 0.00139 | 0.00067 |
| 4.8E-06 | 0.00028 | 0.00093 | -0.0002 | 0.00085 | 0.0013  |
| 4.8E-06 | 0.00041 | 0.00132 | -0.0001 | 0.0012  | 0.00034 |
| 4.9E-06 | 0.00072 | 0.0016  | -0.0004 | 0.00189 | 0.00051 |
| 4.9E-06 | -0.0002 | 0.0011  | -0.0004 | 0.00137 | 0.00016 |
| 4.9E-06 | 0.00043 | 0.00065 | -0.0005 | 0.00167 | 0.00028 |
| 5E-06   | 0.00102 | 0.00054 | 0.00013 | 0.00172 | 0.0008  |
| 5E-06   | 0.00048 | 0.00087 | 0.00027 | 0.00168 | 0.00013 |
| 5E-06   | 0.00026 | 0.00165 | -8E-05  | 0.00129 | 0.00045 |
| 5.1E-06 | 0.00022 | 0.00115 | -0.0002 | 0.00034 | -0.0001 |
| 5.1E-06 | -0.0002 | 0.00183 | 0.00033 | 0.00095 | 0.00111 |
| 5.1E-06 | 0.00025 | 0.00189 | -0.0005 | 0.00146 | 3E-06   |
| 5.2E-06 | -3E-06  | 0.00097 | -1E-04  | 0.00149 | 0.00041 |
| 5.2E-06 | 0.00029 | 0.00145 | -0.0005 | 0.00111 | 0.00081 |
| 5.2E-06 | 0.00017 | 0.00176 | 0.00047 | 0.00097 | -8E-05  |
| 5.2E-06 | -0.0003 | 0.00232 | 0.00056 | 0.00151 | 0.00015 |
| 5.3E-06 | 6.4E-05 | 0.0017  | -0.0003 | 0.00056 | 0.00036 |
| 5.3E-06 | 0.00049 | 0.00151 | -0.0002 | 0.00028 | 0.00028 |
| 5.3E-06 | 0.0004  | 0.00125 | -0.0003 | 0.00094 | 0.00097 |
| 5.4E-06 | 0.00065 | 0.00185 | -3E-05  | 0.00098 | 0.00038 |
| 5.4E-06 | 5.3E-05 | 0.00195 | 0.00022 | 0.00071 | 0.00049 |
| 5.4E-06 | -0.0002 | 0.00157 | -0.0004 | 0.0011  | 0.0011  |
| 5.5E-06 | 0.00016 | 0.00185 | 5.9E-05 | 0.00109 | 0.00082 |
| 5.5E-06 | 0.00048 | 0.00129 | 0.00035 | 0.00125 | 0.0008  |
| 5.5E-06 | -0.0003 | 0.00188 | -0.0002 | 0.00137 | 0.0007  |
| 5.6E-06 | 0.00026 | 0.00166 | -2E-05  | 0.00198 | 0.00087 |
| 5.6E-06 | 0.0003  | 0.00212 | 0.00058 | 0.00158 | 0.00065 |
| 5.6E-06 | 0.00055 | 0.00108 | 0.00014 | 0.00117 | 0.00024 |
| 5.7E-06 | 0.00012 | 0.00133 | -0.0001 | 0.00147 | 0.00061 |
| 5.7E-06 | 0.00051 | 0.00112 | -0.0004 | 0.00197 | 0.00036 |
| 5.7E-06 | -0.0001 | 0.0012  | 0.00011 | 0.00104 | 0.00067 |

|         |         |         |         |         |         |
|---------|---------|---------|---------|---------|---------|
| 5.8E-06 | 0.00057 | 0.00051 | -0.0004 | 0.0012  | 0.00038 |
| 5.8E-06 | 0.0008  | 0.00208 | 0.00038 | 0.00166 | 0.00061 |
| 5.8E-06 | -0.0002 | 0.00183 | -0.0007 | 0.00113 | 0.00044 |
| 5.9E-06 | -0.0001 | 0.00167 | 3.1E-06 | 0.00076 | 0.00057 |
| 5.9E-06 | -0.0005 | 0.00132 | -0.0002 | 0.00152 | 0.00045 |
| 5.9E-06 | 0.00034 | 0.00158 | 0.00029 | 0.00109 | 0.00024 |
| 6E-06   | 0.00052 | 0.0011  | -0.0004 | 0.00132 | 0.00072 |
| 6E-06   | 2.4E-06 | 0.00106 | -9E-05  | 0.00188 | 0.00113 |
| 6E-06   | -0.0002 | 0.00024 | 0.0003  | 0.00085 | 0.00016 |
| 6E-06   | -4E-05  | 0.00151 | 6.7E-05 | 0.00175 | 0.00013 |
| 6.1E-06 | 0.00032 | 0.00205 | -0.0004 | 0.00147 | 0.0007  |
| 6.1E-06 | 0.00018 | 0.00164 | 7.7E-05 | 0.00152 | 0.00035 |
| 6.1E-06 | 0.00028 | 0.00115 | -0.0001 | 0.00088 | 0.00093 |
| 6.2E-06 | 0.00052 | 0.0014  | 4.1E-05 | 0.00167 | 0.00114 |
| 6.2E-06 | -0.0001 | 0.00199 | 0.00039 | 0.00155 | 0.00035 |
| 6.2E-06 | 2.2E-05 | 0.00084 | 0.00016 | 0.00106 | 0.00118 |
| 6.3E-06 | 0.00026 | 0.00102 | 0.00017 | 0.00136 | 0.00099 |
| 6.3E-06 | 0.00062 | 0.00142 | -0.0004 | 0.0011  | 8.9E-05 |
| 6.3E-06 | -0.0003 | 0.00084 | 0.00043 | 0.00072 | 0.00083 |
| 6.4E-06 | -0.0001 | 0.00127 | -0.0006 | 0.00105 | 0.00062 |
| 6.4E-06 | -0.0001 | 0.00165 | -0.0005 | 0.00133 | 0.00056 |
| 6.4E-06 | 0.00017 | 0.00197 | 0.00056 | 0.0014  | 0.00056 |
| 6.5E-06 | 0.00014 | 0.00066 | -0.0001 | 0.00089 | 0.00057 |
| 6.5E-06 | 0.00039 | 0.0013  | -0.0007 | 0.00111 | 0.00081 |
| 6.5E-06 | 0.00026 | 0.00103 | -0.0005 | 0.00106 | 0.00033 |
| 6.6E-06 | 0.00022 | 0.0011  | 0.00026 | 0.00075 | 0.00072 |
| 6.6E-06 | 0.00038 | 0.00077 | -0.0004 | 0.0012  | 0.00069 |
| 6.6E-06 | 0.0006  | 0.00113 | 0.00023 | 0.00106 | 0.00093 |
| 6.7E-06 | 5E-05   | 0.00142 | -0.0004 | 0.00054 | 0.00092 |
| 6.7E-06 | -0.0005 | 0.00144 | 0.00026 | 0.00122 | 0.00056 |
| 6.7E-06 | 0.00043 | 0.00187 | -0.0005 | 0.00188 | -0.0002 |
| 6.8E-06 | 0.00054 | 0.00152 | 0.00054 | 0.00115 | 0.0006  |
| 6.8E-06 | 0.00062 | 0.00101 | 0.00044 | 0.00107 | 0.00042 |
| 6.8E-06 | 0.00036 | 0.00114 | 0.00026 | 0.00088 | 7.3E-05 |
| 6.8E-06 | 0.00077 | 0.00076 | -0.0004 | 0.001   | 0.00046 |
| 6.9E-06 | 0.00012 | 0.00129 | -7E-05  | 0.00095 | 0.00083 |
| 6.9E-06 | 0.0008  | 0.00069 | -0.0009 | 0.00125 | 0.00059 |
| 6.9E-06 | -3E-05  | 0.00117 | 0.00016 | 0.00094 | 0.0004  |
| 7E-06   | 0.00026 | 0.00093 | -0.0004 | 0.00155 | 0.0003  |
| 7E-06   | 0.0002  | 0.00091 | -0.0002 | 0.00157 | 0.00013 |
| 7E-06   | 0.00119 | 0.0008  | -0.0002 | 0.00143 | 0.00023 |
| 7.1E-06 | 0.00051 | 0.00142 | 2.4E-05 | 0.00178 | 0.00029 |
| 7.1E-06 | 0.00045 | 0.00097 | -7E-05  | 0.0017  | 0.00011 |
| 7.1E-06 | 0.0003  | 0.00071 | 0.00011 | 0.00125 | 0.00035 |
| 7.2E-06 | 8.6E-05 | 0.00112 | 0.00018 | 0.00122 | 0.00047 |
| 7.2E-06 | 6.3E-06 | 0.00025 | 0.00018 | 0.00114 | 0.00048 |
| 7.2E-06 | -0.0004 | 0.00117 | -0.0001 | 0.00135 | 0.00029 |
| 7.3E-06 | 0.00044 | 0.00165 | -5E-05  | 0.00117 | 0.00057 |
| 7.3E-06 | 0.00053 | 0.00094 | -0.0008 | 0.00084 | 0.00073 |
| 7.3E-06 | 0.00048 | 0.00118 | -0.0002 | 0.00187 | 0.00053 |
| 7.4E-06 | -1E-04  | 0.00075 | -0.0003 | 0.00152 | 0.00028 |
| 7.4E-06 | -0.0005 | 0.00146 | -0.0002 | 0.00069 | 0.00033 |
| 7.4E-06 | 0.0002  | 0.00135 | -0.0001 | 0.00125 | 0.00039 |
| 7.5E-06 | 0.00113 | 0.00086 | -0.0002 | 0.00038 | 0.00044 |

|         |         |         |         |         |         |
|---------|---------|---------|---------|---------|---------|
| 7.5E-06 | 0.00028 | 0.00132 | -0.0003 | 0.00169 | 0.00062 |
| 7.5E-06 | -0.0002 | 0.00102 | 0.00068 | 0.00152 | 0.00054 |
| 7.6E-06 | 1.2E-05 | 0.00169 | -0.0005 | 0.00079 | 0.00077 |
| 7.6E-06 | 0.00115 | 0.00125 | -0.0005 | 0.00128 | -0.0002 |
| 7.6E-06 | 0.00053 | 0.00113 | -0.0009 | 0.00157 | 0.00059 |
| 7.6E-06 | 0.00021 | 0.0009  | 0.00042 | 0.00087 | -0.0002 |
| 7.7E-06 | 0.00027 | 0.00174 | -0.0005 | 0.00102 | -9E-05  |
| 7.7E-06 | 0.00086 | 0.0011  | 0.00011 | 0.00123 | 0.00049 |
| 7.7E-06 | 0.00017 | 0.00152 | -3E-05  | 0.00114 | 0.00045 |
| 7.8E-06 | 0.00018 | 0.0003  | -0.0007 | 0.00111 | 0.00081 |
| 7.8E-06 | 5.1E-05 | 0.00104 | -0.0007 | 0.00109 | 0.00061 |
| 7.8E-06 | -0.0004 | 0.00102 | -0.0003 | 0.00136 | 0.00107 |
| 7.9E-06 | -0.0003 | 0.00101 | -0.0004 | 0.00167 | 0.00059 |
| 7.9E-06 | -0.0001 | 0.00161 | -0.0002 | 0.00078 | 8.6E-05 |
| 7.9E-06 | 0.001   | 0.00112 | -0.0006 | 0.00089 | 0.00042 |
| 8E-06   | 2.1E-05 | 0.0008  | -0.0001 | 0.00087 | 0.00057 |
| 8E-06   | 0.0006  | 0.00077 | 0.00022 | 0.00117 | 0.00017 |
| 8E-06   | -1E-04  | 0.00133 | 1.6E-05 | 0.00201 | 0.00047 |
| 8.1E-06 | 0.00023 | 0.00134 | -0.0003 | 0.0013  | 0.00018 |
| 8.1E-06 | -0.0002 | 0.00112 | 0.00022 | 0.00131 | 0.00011 |
| 8.1E-06 | 0.00044 | 0.00145 | -0.0005 | 0.00121 | 0.00044 |
| 8.2E-06 | 0.00041 | 0.0008  | 0.00031 | 0.00151 | 0.00033 |
| 8.2E-06 | 0.00041 | 0.00063 | -0.0003 | 0.00043 | 0.00051 |
| 8.2E-06 | -0.0002 | 0.00127 | -0.0004 | 0.00199 | 0.00082 |
| 8.3E-06 | -0.0008 | 0.00093 | 0.00016 | 0.00178 | 0.00024 |
| 8.3E-06 | -3E-05  | 0.00018 | -0.0006 | 0.0006  | 0.0002  |
| 8.3E-06 | 0.00044 | 0.00086 | 2.5E-05 | 0.00077 | 0.00045 |
| 8.4E-06 | -0.0011 | 0.00061 | 4E-05   | 0.001   | 0.00043 |
| 8.4E-06 | -0.0006 | 0.001   | -0.0004 | 0.0021  | 0.00037 |
| 8.4E-06 | -0.0002 | 0.00111 | 0.00011 | 0.00081 | -0.0001 |
| 8.4E-06 | 0.00027 | 0.00132 | -0.0002 | 0.00075 | -0.0003 |
| 8.5E-06 | -0.0006 | 0.00113 | -0.0002 | 0.00096 | 0.00034 |
| 8.5E-06 | -0.0008 | 0.00103 | 2.9E-05 | 0.0014  | 0.0006  |
| 8.5E-06 | -7E-05  | 0.00143 | -0.0002 | 0.00073 | 0.00045 |
| 8.6E-06 | 0.00043 | 0.00132 | -0.0009 | 0.00082 | 7.5E-05 |
| 8.6E-06 | 0.00025 | 0.00092 | -8E-05  | 0.00094 | 0.00046 |
| 8.6E-06 | 9.3E-05 | 0.00104 | 0.00017 | 0.00035 | 0.00017 |
| 8.7E-06 | -0.0003 | 0.00032 | -0.0006 | 0.00107 | 0.00024 |
| 8.7E-06 | 9E-05   | 0.00117 | 0.00027 | 0.00136 | -0.0002 |
| 8.7E-06 | 0.0003  | 0.0009  | 8E-05   | 0.00146 | 2.2E-05 |
| 8.8E-06 | -0.0005 | 0.0011  | -1E-04  | 0.00138 | 0.00092 |
| 8.8E-06 | -0.0002 | 0.00047 | -5E-05  | 0.00127 | 0.00066 |
| 8.8E-06 | -0.0003 | 0.00051 | -3E-05  | 0.00144 | 0.00067 |
| 8.9E-06 | -0.0003 | 0.00153 | -0.0003 | 0.00087 | 0.00031 |
| 8.9E-06 | 0.00034 | 0.00086 | -0.0009 | 0.0016  | 3.1E-05 |
| 8.9E-06 | 0.00057 | 0.00127 | -0.0003 | 0.00069 | 0.00027 |
| 9E-06   | 0.00065 | 0.00137 | -0.0005 | 0.00141 | 9.3E-05 |
| 9E-06   | -0.0005 | 0.00178 | 0.00037 | 0.00065 | 0.00021 |
| 9E-06   | -0.0003 | 0.0007  | -0.0002 | 0.0013  | 0.00039 |
| 9.1E-06 | 4.9E-05 | 0.0009  | -0.0003 | 0.00114 | 0.00046 |
| 9.1E-06 | -0.0005 | 0.00072 | -0.0005 | 0.00044 | -1E-05  |
| 9.1E-06 | 0.00036 | 0.00012 | 0.00029 | 0.00118 | 0.00096 |
| 9.2E-06 | 0.00012 | 0.00126 | 0.00023 | 0.00154 | 5.7E-05 |
| 9.2E-06 | -0.0002 | 0.00137 | 0.00029 | 0.0008  | 0.00022 |

|         |         |         |         |         |         |
|---------|---------|---------|---------|---------|---------|
| 9.2E-06 | 0.00027 | 0.00067 | -0.0009 | 0.00126 | 0.00032 |
| 9.2E-06 | 0.00032 | 0.00191 | 6.7E-05 | 0.00101 | -6E-05  |
| 9.3E-06 | -0.0005 | 0.00121 | 0.00018 | 0.00055 | 0.00042 |
| 9.3E-06 | 0.00018 | 0.00138 | 0.00033 | 0.0008  | 0.0001  |
| 9.3E-06 | 0.00051 | 0.00042 | 0.00013 | 0.00081 | 0.00051 |
| 9.4E-06 | -6E-05  | 0.00164 | 0.00044 | 0.00041 | -0.0003 |
| 9.4E-06 | 0.00016 | 0.00088 | 0.00059 | 0.00133 | 0.00067 |
| 9.4E-06 | -3E-05  | 0.00102 | -0.0005 | 0.00091 | -0.0004 |
| 9.5E-06 | 0.00013 | 0.00081 | -0.0004 | 0.00099 | -0.0003 |
| 9.5E-06 | -0.0005 | 0.00113 | -0.0003 | 0.00145 | -9E-05  |
| 9.5E-06 | 0.00026 | 0.00124 | -0.0005 | 0.00117 | 0.00043 |
| 9.6E-06 | -0.0002 | 0.0007  | -1E-05  | 0.00134 | -6E-05  |
| 9.6E-06 | -0.0004 | 0.00099 | 0.00031 | 0.00097 | 0.00052 |
| 9.6E-06 | 0.00023 | 0.00117 | -0.0007 | 0.00036 | 0.00029 |
| 9.7E-06 | 0.00028 | 0.00065 | -0.0006 | 0.00096 | 0.00022 |
| 9.7E-06 | 0.00033 | 0.0009  | -0.0005 | 0.00038 | 0.00089 |
| 9.7E-06 | 0.00014 | 0.00089 | -8E-05  | 0.00092 | 0.00052 |
| 9.8E-06 | 0.00029 | 0.0006  | 0.00037 | 0.00101 | 0.00081 |
| 9.8E-06 | 0.00065 | 0.00035 | -0.0001 | 0.00066 | 0.00119 |
| 9.8E-06 | -0.0002 | 0.00064 | -0.0001 | 0.00092 | 0.00073 |
| 9.9E-06 | -0.0003 | 0.00098 | 0.00011 | 0.00018 | 0.00032 |
| 9.9E-06 | 0.00042 | 0.00102 | 0.00068 | 0.0013  | 4.4E-05 |
| 9.9E-06 | 0.00012 | 0.00149 | 0.00072 | 0.00101 | -0.0004 |
| 1E-05   | 0.00062 | 0.00157 | -0.0005 | 0.0012  | 7.8E-05 |
| 1E-05   | 0.00031 | 0.00112 | 0.00071 | 0.0014  | 0.00047 |
| 1E-05   | -0.0003 | 0.00088 | -0.0002 | 0.00149 | 0.00055 |
| 1E-05   | 0.00038 | 0.00132 | 0.00055 | 0.00106 | 0.00015 |
| 1E-05   | -0.0004 | 0.00106 | -0.0005 | 0.00166 | 7.7E-05 |
| 1E-05   | -1E-05  | 0.00056 | 0.00015 | 0.00143 | -0.0002 |
| 1E-05   | 9.5E-05 | 0.00096 | -0.0001 | 0.00199 | 0.00015 |
| 1E-05   | -1E-05  | 0.00072 | -0.0002 | 0.00244 | -5E-05  |
| 1E-05   | 1.6E-05 | 0.00038 | -9E-05  | 0.00073 | 0.0009  |
| 1E-05   | 0.00024 | 0.00138 | 0.00013 | 0.00089 | 0.00069 |
| 1E-05   | 6.3E-05 | 0.00126 | 0.00045 | 0.00144 | 0.00042 |
| 1E-05   | 0.0004  | 0.00119 | -0.0007 | 0.00063 | 0.00032 |
| 1E-05   | 0.00027 | 0.00117 | -0.0002 | 0.00105 | 2.8E-06 |
| 1E-05   | 0.00037 | 0.00148 | -0.0007 | 0.00027 | 0.00058 |
| 1E-05   | 0.00026 | 0.00158 | 0.00017 | 0.00053 | 0.00037 |
| 1E-05   | 0.00021 | 0.00114 | -0.0006 | 0.00134 | -0.0001 |
| 1E-05   | 0.0004  | 0.00133 | -0.0004 | 0.00113 | 0.00026 |
| 1.1E-05 | -0.0003 | 0.00065 | 0.00051 | 0.00089 | -0.0002 |
| 1.1E-05 | 1.9E-05 | 0.00148 | 0.00048 | 0.00128 | 0.00048 |
| 1.1E-05 | 0.00079 | 0.0009  | -0.0003 | 0.0011  | -0.0001 |
| 1.1E-05 | 0.00058 | 0.00058 | -0.0001 | 0.00153 | 0.00032 |
| 1.1E-05 | 3.2E-05 | 0.00071 | 0.00034 | 0.00025 | 0.00031 |
| 1.1E-05 | -0.0006 | 0.00041 | -0.0004 | 0.00039 | -8E-05  |
| 1.1E-05 | 0.00036 | 0.0005  | -0.0012 | 0.00076 | 5E-05   |
| 1.1E-05 | 6.8E-05 | 0.0016  | 0.00042 | 0.00232 | 0.00068 |
| 1.1E-05 | 0.00085 | 0.00085 | 0.00016 | 0.00188 | -0.0001 |
| 1.1E-05 | 0.00024 | 0.00091 | 2.2E-05 | 0.00152 | -6E-05  |
| 1.1E-05 | -0.0005 | 0.00052 | 0.00022 | 0.00109 | -0.0002 |
| 1.1E-05 | 4.5E-05 | 0.00106 | -0.0003 | 0.00071 | 0.00064 |
| 1.1E-05 | 0.00014 | 0.00106 | 0.00016 | 0.00073 | 0.00037 |
| 1.1E-05 | -0.0003 | 0.00061 | -0.0004 | 0.00041 | 0.00046 |



|         |         |         |         |         |         |
|---------|---------|---------|---------|---------|---------|
| 1.1E-05 | -0.0004 | 0.00122 | -0.0004 | 0.001   | 0.00037 |
| 1.1E-05 | 6.9E-05 | 0.00098 | -0.0001 | 0.00091 | 8.7E-05 |
| 1.1E-05 | -0.0008 | 0.00094 | 0.00015 | 0.00082 | 0.00036 |
| 1.1E-05 | -6E-06  | 0.00117 | -0.0004 | 0.00016 | 0.00073 |
| 1.1E-05 | -0.0007 | 0.0009  | -8E-05  | 0.00133 | 0.00092 |
| 1.1E-05 | 0.00034 | 0.00019 | -9E-05  | 0.0013  | 0.00013 |
| 1.1E-05 | 0.00087 | 0.00061 | -0.0002 | 0.00165 | -0.0001 |
| 1.1E-05 | 1E-05   | 0.00073 | 0.0008  | 0.0007  | -0.0002 |
| 1.1E-05 | -0.0004 | 4.7E-05 | -0.0002 | 0.00078 | 0.00053 |
| 1.1E-05 | 8.2E-05 | 0.00049 | 2E-05   | 0.00074 | 0.00036 |
| 1.1E-05 | 8.9E-05 | 0.00102 | -0.0002 | 0.00085 | 0.00017 |
| 1.1E-05 | 0.00044 | 7E-05   | -0.0009 | 0.00161 | 0.00018 |
| 1.1E-05 | 0.00018 | 0.0002  | 0.00039 | 0.00129 | 0.00012 |
| 1.1E-05 | 0.00035 | 0.00066 | 0.00084 | 0.0013  | 0.00013 |
| 1.1E-05 | 0.0002  | 0.00124 | -0.0009 | 0.00095 | 0.00025 |
| 1.1E-05 | 0.00024 | 0.00091 | -3E-05  | 0.00132 | -2E-05  |
| 1.1E-05 | 0.00026 | 0.00054 | -0.0006 | 0.00155 | 0.00029 |
| 1.1E-05 | 0.00069 | 0.00033 | -0.0005 | 0.00237 | -9E-05  |
| 1.2E-05 | -0.0002 | 0.00079 | -0.0002 | 0.00163 | 0.00041 |
| 1.2E-05 | -0.0001 | 0.00103 | 0.00043 | 0.00131 | 1.7E-05 |
| 1.2E-05 | 0.00064 | 0.00104 | 0.00091 | 0.00101 | 0.00073 |
| 1.2E-05 | 0.00042 | 4.9E-05 | 0.00046 | 0.00191 | -0.0004 |
| 1.2E-05 | 7.2E-05 | 0.00073 | -0.0003 | 0.0012  | 0.00025 |
| 1.2E-05 | -0.0003 | 0.00121 | -0.0006 | 0.0018  | 0.00013 |
| 1.2E-05 | 0.00018 | 0.00101 | 3.1E-06 | 0.00184 | -8E-05  |
| 1.2E-05 | -0.0001 | 0.00101 | 0.00098 | 0.0012  | 0.00061 |
| 1.2E-05 | 7.7E-05 | 0.00087 | -0.0006 | 0.00092 | -3E-05  |
| 1.2E-05 | 0.0003  | 0.00144 | -0.0005 | 0.00153 | 0.00093 |
| 1.2E-05 | -0.0003 | 0.00113 | -2E-05  | 0.00071 | 0.00032 |
| 1.2E-05 | 5.5E-05 | 0.00098 | 0.00011 | 0.00166 | 0.00091 |
| 1.2E-05 | 5.9E-05 | 0.00152 | 0.00016 | 0.00078 | -0.0002 |
| 1.2E-05 | -0.0002 | 0.00159 | 0.00033 | 0.00045 | 5.6E-05 |
| 1.2E-05 | -0.0002 | 0.00047 | -0.0001 | 0.00094 | 0.00066 |
| 1.2E-05 | 0.00064 | 0.00065 | 4.5E-05 | 0.00117 | 0.00024 |
| 1.2E-05 | 0.00021 | 0.00135 | -0.0003 | 0.00102 | 7.9E-05 |
| 1.2E-05 | -6E-05  | 0.0006  | 0.00022 | 0.00064 | 9.2E-05 |
| 1.2E-05 | 0.00024 | 0.00122 | 0.00031 | 0.00089 | -4E-05  |
| 1.2E-05 | 0.00058 | 0.00082 | 0.00036 | 0.00102 | 0.00052 |
| 1.2E-05 | -5E-05  | 0.00173 | -0.0003 | 0.00118 | -0.0001 |
| 1.2E-05 | -0.0003 | 0.00091 | 0.00043 | 0.0004  | -0.0004 |
| 1.2E-05 | -0.0004 | 0.00028 | -0.001  | 0.00064 | 0.00058 |
| 1.2E-05 | 0.00054 | 0.00108 | -0.0009 | 0.00061 | 0.00028 |
| 1.2E-05 | -0.0002 | 0.00057 | -0.0002 | 0.00123 | -0.0002 |
| 1.2E-05 | 0.00076 | 0.00099 | -0.0003 | 0.00162 | -0.0003 |
| 1.2E-05 | -8E-05  | 0.0014  | 0.00015 | 0.00049 | 0.00084 |
| 1.2E-05 | -0.0004 | 0.00138 | -0.0003 | 0.00115 | 0.00076 |
| 1.2E-05 | 0.00043 | 0.001   | -0.0005 | 0.0013  | 0.00028 |
| 1.2E-05 | -0.0005 | 0.00149 | 0.0002  | 0.00092 | -9E-05  |
| 1.2E-05 | -0.0004 | 0.00149 | -0.0006 | 0.00094 | -0.0007 |
| 1.3E-05 | -9E-05  | 0.00183 | -0.0004 | 0.00105 | 0.00057 |
| 1.3E-05 | -0.0003 | 0.00148 | -0.0005 | 0.00148 | 0.00053 |
| 1.3E-05 | 0.00012 | 0.00108 | -0.0006 | 0.00193 | -0.0004 |
| 1.3E-05 | 0.00034 | 0.00073 | -0.0011 | 0.00069 | 0.00035 |
| 1.3E-05 | 0.00077 | 0.00157 | -0.0009 | 0.00138 | -0.0003 |

|         |         |         |         |         |         |
|---------|---------|---------|---------|---------|---------|
| 1.3E-05 | -0.0001 | -9E-05  | 0.00033 | 0.00125 | 0.0001  |
| 1.3E-05 | 0.00022 | 0.00019 | -0.0002 | 0.00153 | 0.00058 |
| 1.3E-05 | 0.00096 | 0.0011  | -0.0008 | 0.00098 | 0.00012 |
| 1.3E-05 | 0.00057 | 0.00055 | 8.8E-05 | 0.00094 | 0.00018 |
| 1.3E-05 | -0.0002 | 0.00059 | -0.0002 | 0.0011  | 0.00022 |
| 1.3E-05 | -0.0009 | 0.00124 | 9.4E-05 | 0.00114 | 0.00058 |
| 1.3E-05 | -0.0001 | 0.00143 | -0.0002 | 0.00033 | 0.00073 |
| 1.3E-05 | -1E-05  | 0.00169 | -8E-05  | 0.0012  | 2E-05   |
| 1.3E-05 | -0.0003 | 0.00155 | -0.0004 | 0.00127 | -0.0002 |
| 1.3E-05 | -0.0002 | 0.00111 | -0.0003 | 0.0008  | 0.00033 |
| 1.3E-05 | 0.00024 | 0.00121 | 0.00025 | 0.00081 | 9.5E-05 |
| 1.3E-05 | 0.00113 | 0.00084 | 2.2E-05 | 0.0008  | -5E-05  |
| 1.3E-05 | -6E-05  | 0.00046 | 0.00041 | 0.00163 | 0.00031 |
| 1.3E-05 | -0.0002 | 0.0003  | 0.00048 | 0.00138 | 0.00013 |
| 1.3E-05 | 0.0008  | 0.00155 | -0.0002 | 0.00142 | 0.00015 |
| 1.3E-05 | 0.00067 | 0.00125 | -0.0004 | 0.00102 | 0.00022 |
| 1.3E-05 | 0.0002  | 0.00019 | -3E-05  | 0.00042 | 0.00043 |
| 1.3E-05 | 0.00037 | 0.00091 | 0.00083 | 0.00127 | 0.00085 |
| 1.3E-05 | 0.00046 | 0.00135 | -0.0004 | 0.00151 | 0.00073 |
| 1.3E-05 | 0.00034 | 0.00059 | -0.0006 | 0.00063 | -0.0004 |
| 1.3E-05 | -3E-05  | 0.00171 | -0.0005 | 0.00101 | 0.00025 |
| 1.3E-05 | 0.00065 | 0.00075 | -0.0001 | 0.00135 | 0.00079 |
| 1.3E-05 | 0.00052 | 0.00033 | -0.0005 | 0.00107 | 0.00032 |
| 1.3E-05 | 0.00021 | 0.00067 | -0.0004 | 0.00124 | 0.00048 |
| 1.3E-05 | 0.00048 | 0.00067 | -0.0007 | 0.00126 | 0.0007  |
| 1.3E-05 | 0.00054 | 0.00094 | 0.00079 | 0.00122 | 0.0002  |
| 1.4E-05 | 0.00089 | 0.00125 | -0.0003 | 0.00138 | -0.0001 |
| 1.4E-05 | 0.00136 | 0.00118 | -0.0005 | 0.00116 | 0.00013 |
| 1.4E-05 | 0.00073 | 0.0009  | -0.0007 | 0.00084 | -0.0002 |
| 1.4E-05 | -0.0002 | -0.0001 | -0.0013 | 0.00111 | 0.00019 |
| 1.4E-05 | -8E-05  | 0.00046 | 0.00027 | 0.00097 | 0.00029 |
| 1.4E-05 | 0.00038 | 0.00063 | 0.0004  | 0.00126 | 0.00056 |
| 1.4E-05 | 0.00036 | 0.00069 | -0.0004 | 0.00107 | 5.5E-05 |
| 1.4E-05 | 0.00019 | 0.00078 | 0.00019 | 0.00062 | 0.0003  |
| 1.4E-05 | 0.00039 | 0.00084 | -0.0003 | 0.00065 | 0.00106 |
| 1.4E-05 | -8E-05  | 0.00064 | -0.0003 | 0.00115 | 0.00024 |
| 1.4E-05 | 0.00047 | 0.00016 | 3E-05   | 0.00066 | -7E-05  |
| 1.4E-05 | 0.00014 | 0.002   | -0.0006 | 0.00101 | -4E-05  |
| 1.4E-05 | 3.1E-05 | 0.00044 | -0.0007 | 0.00087 | -0.0002 |
| 1.4E-05 | 0.00031 | 0.00094 | 0.00047 | 0.00068 | 0.00075 |
| 1.4E-05 | 3.9E-05 | 0.00035 | -7E-05  | 0.00028 | 0.00076 |
| 1.4E-05 | 0.00095 | 9.8E-06 | -0.0007 | 0.00066 | 0.00062 |
| 1.4E-05 | 0.00116 | 0.00015 | 0.00019 | 0.00183 | 0.00015 |
| 1.4E-05 | 0.00041 | 0.00087 | 0.00035 | 0.00125 | 5.1E-05 |
| 1.4E-05 | 0.00053 | 0.00094 | -0.0008 | 0.00085 | 0.00017 |
| 1.4E-05 | 0.00013 | 0.00064 | 0.0002  | 0.00112 | -0.0003 |
| 1.4E-05 | 0.00033 | 0.00077 | -0.0005 | 0.00081 | 0.00032 |
| 1.4E-05 | 0.00063 | 0.00098 | 6E-05   | 0.00049 | 0.00017 |
| 1.4E-05 | 0.00022 | 0.00141 | -0.0004 | 0.00133 | 0.00064 |
| 1.4E-05 | -1E-05  | 0.00092 | -0.0002 | 0.00023 | -8E-05  |
| 1.4E-05 | -0.0004 | 0.00089 | -4E-06  | 0.00077 | 0.00033 |
| 1.4E-05 | 0.00069 | 0.0019  | -0.0004 | 0.00102 | 0.00072 |
| 1.4E-05 | 6.2E-05 | 0.00121 | 1.6E-05 | 0.00127 | 8.2E-05 |
| 1.4E-05 | -0.0005 | 0.00084 | -0.0003 | 0.00037 | 0.00045 |

|         |         |         |         |         |         |
|---------|---------|---------|---------|---------|---------|
| 1.4E-05 | 1.1E-05 | 0.00058 | -0.0006 | 0.00115 | 0.00028 |
| 1.4E-05 | 0.00078 | 0.00145 | -0.0004 | 0.00097 | 0.00027 |
| 1.4E-05 | 0.00095 | 0.00168 | -0.0006 | 0.00131 | 0.00021 |
| 1.5E-05 | 0.00048 | -1E-05  | -0.0009 | 0.00101 | 7.7E-05 |
| 1.5E-05 | 0.00041 | 0.00099 | 0.00082 | 0.00053 | 4.1E-05 |
| 1.5E-05 | 0.00013 | 0.00157 | -0.0008 | 0.00086 | -0.0002 |
| 1.5E-05 | -0.0007 | 0.00059 | -0.0002 | 0.00118 | -4E-05  |
| 1.5E-05 | -5E-06  | 0.00076 | -0.0005 | 0.00107 | 0.00014 |
| 1.5E-05 | 1.4E-05 | 0.00068 | -0.0004 | 0.00088 | 0.00023 |
| 1.5E-05 | 0.00064 | 0.0007  | -0.0004 | 0.0013  | 0.00033 |
| 1.5E-05 | -7E-05  | 0.00128 | 0.00059 | 0.00071 | 2.1E-05 |
| 1.5E-05 | -2E-05  | 0.00166 | 0.00038 | 0.0005  | -0.0003 |
| 1.5E-05 | 0.00028 | 0.0017  | 0.00013 | 0.00088 | -0.0002 |
| 1.5E-05 | 0.0003  | 0.00057 | -9E-05  | 0.00046 | 0.00023 |
| 1.5E-05 | 0.00029 | 0.00074 | 0.00104 | 0.00104 | 6.4E-05 |
| 1.5E-05 | 0.0011  | 0.00095 | 0.00021 | 0.00055 | 0.00015 |
| 1.5E-05 | 0.00018 | 0.00082 | -0.0004 | 0.00109 | -0.0003 |
| 1.5E-05 | -0.0004 | 0.0012  | -0.0004 | 0.00111 | -3E-05  |
| 1.5E-05 | 0.00023 | 0.00133 | -0.0006 | 0.00108 | 0.00051 |

**Table SI.8:** Primary kinetic data for the reaction of 2-piperidinone (**S8**) with CumO• generated by 355 nm LFP in MeCN (**Figure SI.8**).

| t / s   | $\Delta A$ 2-piperidinone ( <b>S8</b> ) |         |         |         |         |
|---------|-----------------------------------------|---------|---------|---------|---------|
|         | 0.0807M                                 | 0.245M  | 0.404M  | 0.598M  | 0.807M  |
| -1E-06  | -5E-06                                  | 0.0007  | -3E-06  | 0.00044 | 0.00068 |
| -1E-06  | 0.00103                                 | 0.00076 | -0.0006 | 9.8E-06 | 0.00067 |
| -9E-07  | 0.0014                                  | 0.00187 | -0.0003 | 0.00023 | 0.0007  |
| -9E-07  | 0.00114                                 | 0.00122 | 0.00032 | 0.00016 | 0.00058 |
| -9E-07  | 0.0011                                  | 0.00085 | -0.0004 | 0.00018 | 0.0007  |
| -8E-07  | 0.00154                                 | 0.00041 | -8E-05  | 0.00037 | 0.00072 |
| -8E-07  | 0.00132                                 | 0.00045 | -0.0009 | -0.001  | 0.00048 |
| -8E-07  | 0.00079                                 | 0.00029 | 0.00017 | 0.00078 | 0.00019 |
| -7E-07  | 0.00094                                 | 0.00103 | 0.00015 | -0.0002 | 0.00085 |
| -7E-07  | 0.00035                                 | 0.00033 | -0.0002 | 5.8E-05 | 0.00056 |
| -7E-07  | 0.00128                                 | 0.00024 | 9.6E-05 | 0.0005  | 0.00046 |
| -6E-07  | 0.00085                                 | -0.0001 | -0.0006 | 4.3E-06 | 0.00086 |
| -6E-07  | 0.0019                                  | 0.00023 | 0.00042 | -3E-05  | 0.0005  |
| -6E-07  | 0.00093                                 | 0.00012 | -0.0003 | -7E-05  | 9.4E-05 |
| -5E-07  | 0.00138                                 | 0.00096 | -9E-05  | 6.1E-05 | 0.00025 |
| -5E-07  | 0.00077                                 | 0.00174 | -0.0001 | 0.0006  | 9.7E-05 |
| -5E-07  | 0.00092                                 | 0.00029 | -0.0003 | 0.0004  | 0.00068 |
| -4E-07  | 0.00078                                 | 0.00068 | -0.0005 | 0.00043 | 0.00075 |
| -4E-07  | 0.00163                                 | 0.00057 | -0.0007 | -0.0002 | 0.00073 |
| -4E-07  | 0.00091                                 | 0.00071 | 0.00019 | -0.0003 | 0.00054 |
| -4E-07  | 0.00133                                 | 0.00174 | 1.1E-05 | 0.00076 | 0.00064 |
| -3E-07  | 0.00076                                 | 0.00105 | -0.0007 | -1E-06  | 0.00075 |
| -3E-07  | 0.00056                                 | 0.00105 | -0.0004 | 8.7E-05 | 0.00093 |
| -3E-07  | 0.00088                                 | 0.00064 | -0.0009 | -0.0003 | 0.00053 |
| -2E-07  | 0.00162                                 | 0.00123 | -0.0002 | 0.00062 | 0.00071 |
| -2E-07  | 0.00142                                 | 0.00177 | 0.00049 | 0.00066 | -6E-05  |
| -2E-07  | 0.00148                                 | 0.00087 | -0.0006 | -0.0003 | -6E-06  |
| -1E-07  | 0.00077                                 | 0.00134 | -0.0006 | -0.0007 | -8E-05  |
| -1E-07  | 0.00056                                 | 5E-05   | -0.0003 | -0.0002 | 0.0009  |
| -6E-08  | 0.00084                                 | 8.3E-05 | -0.0008 | -0.0002 | 0.00032 |
| -3E-08  | 0.00108                                 | 0.00056 | -0.0007 | 0.00028 | 1.4E-05 |
| -4E-10  | -0.0026                                 | -0.0031 | -0.003  | -0.0023 | -0.0038 |
| 3.2E-08 | -0.0154                                 | -0.0139 | -0.0164 | -0.0132 | -0.0164 |
| 6.4E-08 | 0.00871                                 | 0.0082  | 0.00814 | 0.00772 | 0.00911 |
| 9.6E-08 | 0.01558                                 | 0.01728 | 0.01505 | 0.01625 | 0.01839 |
| 1.3E-07 | 0.01569                                 | 0.01575 | 0.0142  | 0.01433 | 0.0162  |
| 1.6E-07 | 0.0151                                  | 0.01499 | 0.01243 | 0.01337 | 0.01425 |
| 1.9E-07 | 0.01461                                 | 0.014   | 0.01177 | 0.01222 | 0.01309 |
| 2.2E-07 | 0.01497                                 | 0.01423 | 0.0117  | 0.01095 | 0.01302 |
| 2.6E-07 | 0.01379                                 | 0.01275 | 0.01124 | 0.01064 | 0.01121 |
| 2.9E-07 | 0.01426                                 | 0.01217 | 0.01081 | 0.0089  | 0.01092 |
| 3.2E-07 | 0.01357                                 | 0.01234 | 0.00957 | 0.00906 | 0.00996 |
| 3.5E-07 | 0.01339                                 | 0.0119  | 0.00807 | 0.00889 | 0.00859 |
| 3.8E-07 | 0.0123                                  | 0.01098 | 0.00787 | 0.00816 | 0.00785 |
| 4.2E-07 | 0.01228                                 | 0.01052 | 0.00783 | 0.00774 | 0.00817 |
| 4.5E-07 | 0.01248                                 | 0.01019 | 0.00777 | 0.00735 | 0.00709 |
| 4.8E-07 | 0.01105                                 | 0.00966 | 0.0072  | 0.00608 | 0.00679 |
| 5.1E-07 | 0.0115                                  | 0.00906 | 0.00698 | 0.00593 | 0.00613 |
| 5.4E-07 | 0.01053                                 | 0.00911 | 0.00614 | 0.00576 | 0.00645 |

|         |         |         |         |         |         |
|---------|---------|---------|---------|---------|---------|
| 5.8E-07 | 0.01088 | 0.00921 | 0.00616 | 0.00514 | 0.00574 |
| 6.1E-07 | 0.01054 | 0.00845 | 0.00581 | 0.00432 | 0.00512 |
| 6.4E-07 | 0.01067 | 0.00743 | 0.00616 | 0.00571 | 0.00514 |
| 6.7E-07 | 0.00993 | 0.00703 | 0.00513 | 0.00432 | 0.00521 |
| 7E-07   | 0.00963 | 0.00725 | 0.00448 | 0.00475 | 0.0042  |
| 7.4E-07 | 0.00927 | 0.00725 | 0.00461 | 0.00354 | 0.00424 |
| 7.7E-07 | 0.00948 | 0.00685 | 0.00407 | 0.00382 | 0.00446 |
| 8E-07   | 0.0089  | 0.00673 | 0.00421 | 0.00349 | 0.00421 |
| 8.3E-07 | 0.00867 | 0.00652 | 0.00407 | 0.00369 | 0.00336 |
| 8.6E-07 | 0.00838 | 0.00623 | 0.00347 | 0.00316 | 0.00317 |
| 9E-07   | 0.00796 | 0.00649 | 0.00248 | 0.00277 | 0.00328 |
| 9.3E-07 | 0.00837 | 0.00503 | 0.00283 | 0.00247 | 0.00331 |
| 9.6E-07 | 0.00735 | 0.00583 | 0.00252 | 0.00223 | 0.00309 |
| 9.9E-07 | 0.00773 | 0.00503 | 0.00229 | 0.00235 | 0.0029  |
| 1E-06   | 0.00729 | 0.00422 | 0.00201 | 0.00252 | 0.00289 |
| 1.1E-06 | 0.00724 | 0.00484 | 0.00289 | 0.00224 | 0.00336 |
| 1.1E-06 | 0.00735 | 0.00422 | 0.00371 | 0.00303 | 0.00236 |
| 1.1E-06 | 0.00707 | 0.00482 | 0.00219 | 0.00233 | 0.0026  |
| 1.2E-06 | 0.00697 | 0.00401 | 0.00267 | 0.00229 | 0.00226 |
| 1.2E-06 | 0.00675 | 0.0047  | 0.00157 | 0.00149 | 0.00213 |
| 1.2E-06 | 0.00642 | 0.00412 | 0.00178 | 0.00179 | 0.00241 |
| 1.2E-06 | 0.00598 | 0.00448 | 0.00172 | 0.00207 | 0.00212 |
| 1.3E-06 | 0.00573 | 0.00422 | 0.00175 | 0.00186 | 0.00175 |
| 1.3E-06 | 0.00675 | 0.00495 | 0.00194 | 0.00227 | 0.00264 |
| 1.3E-06 | 0.00598 | 0.00358 | 0.00047 | 0.00201 | 0.00167 |
| 1.4E-06 | 0.00626 | 0.00437 | 0.00216 | 0.00166 | 0.00245 |
| 1.4E-06 | 0.00601 | 0.00389 | 0.00044 | 0.00154 | 0.00251 |
| 1.4E-06 | 0.00567 | 0.00379 | 0.00145 | 0.00135 | 0.00242 |
| 1.5E-06 | 0.00691 | 0.00383 | 0.00169 | 0.00091 | 0.00127 |
| 1.5E-06 | 0.0061  | 0.00305 | 0.0009  | 0.00107 | 0.00134 |
| 1.5E-06 | 0.0051  | 0.0033  | 0.00113 | 0.00105 | 0.00217 |
| 1.6E-06 | 0.00511 | 0.00284 | 0.00075 | 0.00106 | 0.00232 |
| 1.6E-06 | 0.00483 | 0.00287 | 0.00076 | 0.00114 | 0.00198 |
| 1.6E-06 | 0.00471 | 0.00274 | 0.00126 | 0.00079 | 0.00181 |
| 1.7E-06 | 0.00466 | 0.00234 | 0.00103 | 0.001   | 0.00157 |
| 1.7E-06 | 0.00374 | 0.00313 | 0.00027 | 0.00036 | 0.00224 |
| 1.7E-06 | 0.00485 | 0.00353 | 0.00065 | 0.00075 | 0.00259 |
| 1.8E-06 | 0.00427 | 0.00245 | 0.00076 | 0.00132 | 0.00248 |
| 1.8E-06 | 0.00395 | 0.00297 | 0.00069 | 0.00089 | 0.00172 |
| 1.8E-06 | 0.004   | 0.00248 | 0.00048 | 0.00127 | 0.00159 |
| 1.9E-06 | 0.00439 | 0.00271 | 0.00049 | 0.00129 | 0.00157 |
| 1.9E-06 | 0.00371 | 0.00252 | 0.0008  | 0.00149 | 0.00154 |
| 1.9E-06 | 0.00451 | 0.00209 | 0.00104 | 0.00106 | 0.0025  |
| 2E-06   | 0.00435 | 0.00285 | 0.00034 | 0.0014  | 0.00253 |
| 2E-06   | 0.00328 | 0.00318 | 0.00056 | 0.00146 | 0.00254 |
| 2E-06   | 0.00425 | 0.00309 | 0.00112 | 0.00106 | 0.00146 |
| 2E-06   | 0.00286 | 0.00221 | 0.00112 | 0.00092 | 0.00189 |
| 2.1E-06 | 0.00365 | 0.00233 | 0.00069 | 0.00146 | 0.00177 |
| 2.1E-06 | 0.00266 | 0.00279 | 0.0004  | 0.00072 | 0.00158 |
| 2.1E-06 | 0.00314 | 0.00198 | 0.00089 | 0.00127 | 0.00157 |
| 2.2E-06 | 0.00309 | 0.00143 | 0.00081 | 0.00112 | 0.00168 |
| 2.2E-06 | 0.00377 | 0.00249 | 0.00082 | 0.00189 | 0.00228 |
| 2.2E-06 | 0.00302 | 0.00261 | 0.00031 | 0.00127 | 0.00163 |
| 2.3E-06 | 0.00215 | 0.00207 | 1.3E-05 | 0.00126 | 0.00156 |

|         |         |         |         |         |         |
|---------|---------|---------|---------|---------|---------|
| 2.3E-06 | 0.00255 | 0.002   | 0.00052 | 0.00096 | 0.00298 |
| 2.3E-06 | 0.00299 | 0.00257 | 0.00054 | 0.00112 | 0.00225 |
| 2.4E-06 | 0.00304 | 0.00186 | 0.0004  | 0.00127 | 0.00192 |
| 2.4E-06 | 0.00308 | 0.00239 | 0.00054 | 0.00124 | 0.0019  |
| 2.4E-06 | 0.00275 | 0.00205 | -6E-05  | 0.00141 | 0.00236 |
| 2.5E-06 | 0.00332 | 0.00286 | 0.00108 | 0.00104 | 0.00183 |
| 2.5E-06 | 0.0025  | 0.00253 | -6E-05  | 0.00168 | 0.00181 |
| 2.5E-06 | 0.00267 | 0.0017  | 0.00066 | 0.00088 | 0.0022  |
| 2.6E-06 | 0.00308 | 0.00183 | -1E-05  | 0.00067 | 0.00219 |
| 2.6E-06 | 0.0031  | 0.00181 | 0.00043 | 0.00034 | 0.00163 |
| 2.6E-06 | 0.00243 | 0.00213 | 0.00066 | 0.00156 | 0.00191 |
| 2.7E-06 | 0.00241 | 0.00199 | 0.00083 | 0.00117 | 0.00111 |
| 2.7E-06 | 0.00318 | 0.00196 | 0.00011 | 0.00098 | 0.00204 |
| 2.7E-06 | 0.00245 | 0.00149 | 0.00041 | 0.00126 | 0.00243 |
| 2.8E-06 | 0.00271 | 0.00198 | -7E-05  | 0.00177 | 0.00138 |
| 2.8E-06 | 0.00228 | 0.0014  | 5.8E-06 | 0.00164 | 0.00169 |
| 2.8E-06 | 0.00223 | 0.00166 | 9.4E-05 | 0.00143 | 0.00204 |
| 2.8E-06 | 0.00228 | 0.00194 | 0.00054 | 0.00132 | 0.00153 |
| 2.9E-06 | 0.00293 | 0.00184 | 0.0006  | 0.00149 | 0.00184 |
| 2.9E-06 | 0.00237 | 0.0018  | 0.00016 | 0.0014  | 0.00179 |
| 2.9E-06 | 0.00212 | 0.00144 | -0.0004 | 0.00098 | 0.00159 |
| 3E-06   | 0.00264 | 0.00185 | -0.0001 | 0.00095 | 0.00064 |
| 3E-06   | 0.00215 | 0.00166 | -3E-05  | 0.00078 | 0.00193 |
| 3E-06   | 0.00235 | 0.00144 | 0.00017 | 0.00065 | 0.00197 |
| 3.1E-06 | 0.00258 | 0.00216 | -0.0003 | 0.00078 | 0.00125 |
| 3.1E-06 | 0.00248 | 0.00141 | 0.00052 | 0.0007  | 0.00152 |
| 3.1E-06 | 0.0024  | 0.0019  | -0.0004 | 0.00123 | 0.00134 |
| 3.2E-06 | 0.00234 | 0.00204 | 0.00018 | 0.0006  | 0.00049 |
| 3.2E-06 | 0.00196 | 0.00131 | 0.00058 | 0.00123 | 0.00092 |
| 3.2E-06 | 0.00233 | 0.00155 | 2.7E-05 | 0.00097 | 0.00147 |
| 3.3E-06 | 0.002   | 0.00166 | -0.0004 | 0.00102 | 0.00085 |
| 3.3E-06 | 0.00277 | 0.00087 | -0.0002 | 0.00073 | 0.00104 |
| 3.3E-06 | 0.00257 | 0.00161 | -1E-04  | 0.00045 | 0.00123 |
| 3.4E-06 | 0.00273 | 0.00125 | -0.0001 | 0.00133 | 0.00203 |
| 3.4E-06 | 0.00204 | 0.00122 | 0.00025 | 0.00096 | 0.00141 |
| 3.4E-06 | 0.0024  | 0.00194 | -0.0004 | 0.00028 | 0.00156 |
| 3.5E-06 | 0.00161 | 0.00245 | 0.00081 | 0.00127 | 0.00155 |
| 3.5E-06 | 0.00191 | 0.00069 | -0.0003 | 0.00127 | 0.00099 |
| 3.5E-06 | 0.00208 | 0.00154 | -0.0005 | 0.00064 | 0.00114 |
| 3.6E-06 | 0.00175 | 0.00142 | -4E-05  | -9E-05  | 0.00128 |
| 3.6E-06 | 0.00217 | 0.00152 | -0.0003 | 0.00041 | 0.00062 |
| 3.6E-06 | 0.00177 | 0.00155 | -0.0002 | 0.00067 | 0.00158 |
| 3.6E-06 | 0.00185 | 0.002   | 0.00023 | 0.00093 | 0.00085 |
| 3.7E-06 | 0.0017  | 0.00103 | 7.4E-05 | 0.00069 | 0.00085 |
| 3.7E-06 | 0.00217 | 0.00181 | -0.0004 | 0.00086 | 0.00235 |
| 3.7E-06 | 0.0018  | 0.00192 | 0.00096 | 0.00101 | 0.00205 |
| 3.8E-06 | 0.00267 | 0.00141 | -9E-05  | 0.00072 | 0.0014  |
| 3.8E-06 | 0.00168 | 0.00161 | -0.0001 | 0.00092 | 0.00222 |
| 3.8E-06 | 0.00182 | 0.0012  | 1.5E-05 | 0.00125 | 0.00192 |
| 3.9E-06 | 0.0019  | 0.00098 | 0.00081 | 0.0009  | 0.00141 |
| 3.9E-06 | 0.00158 | 0.00082 | 0.00038 | 0.00048 | 0.00088 |
| 3.9E-06 | 0.0022  | 0.00113 | 0.00019 | 0.00113 | 0.00119 |
| 4E-06   | 0.00191 | 0.00116 | 0.00064 | 0.00139 | 0.00249 |
| 4E-06   | 0.00155 | 0.00111 | 0.00018 | 0.00058 | 0.00069 |

|         |         |         |         |         |         |
|---------|---------|---------|---------|---------|---------|
| 4E-06   | 0.00222 | 0.0012  | 7.5E-05 | 0.00178 | 0.00157 |
| 4.1E-06 | 0.00215 | 0.00047 | -0.0003 | 0.00135 | 0.00138 |
| 4.1E-06 | 0.00178 | 0.00146 | 0.00016 | 0.00119 | 0.00152 |
| 4.1E-06 | 0.00181 | 0.00221 | 0.00031 | 0.00095 | 0.00124 |
| 4.2E-06 | 0.00186 | 0.00195 | -0.0002 | 0.00069 | 0.00173 |
| 4.2E-06 | 0.00203 | 0.00163 | 0.00053 | -2E-06  | 0.00133 |
| 4.2E-06 | 0.00047 | 0.00138 | 1E-05   | 0.00104 | 0.00097 |
| 4.3E-06 | 0.0019  | 0.00119 | 0.00053 | 0.00149 | 0.00122 |
| 4.3E-06 | 0.00195 | 0.00205 | -0.0006 | 0.00108 | 0.00109 |
| 4.3E-06 | 0.0022  | 0.00078 | 0.00097 | 0.00064 | 0.00184 |
| 4.4E-06 | 0.00243 | 0.00137 | 4.1E-05 | 0.00062 | 0.00139 |
| 4.4E-06 | 0.00055 | 0.00128 | 0.00025 | 0.00102 | 0.00222 |
| 4.4E-06 | 0.0014  | 0.00121 | 0.00048 | 0.00029 | 0.0017  |
| 4.4E-06 | 0.00201 | 0.0017  | 0.00031 | 0.00099 | 0.00177 |
| 4.5E-06 | 0.00232 | 0.00123 | -9E-05  | 0.00054 | 0.00128 |
| 4.5E-06 | 0.00201 | 0.00174 | 6.9E-06 | 0.00149 | 0.00175 |
| 4.5E-06 | 0.00208 | 0.00174 | -0.0002 | 0.00123 | 0.00161 |
| 4.6E-06 | 0.00194 | 0.00102 | -0.0007 | 0.00076 | 0.00162 |
| 4.6E-06 | 0.00184 | 0.00146 | -0.0002 | 0.00067 | 0.00061 |
| 4.6E-06 | 0.00152 | 0.00128 | 0.00024 | 0.00179 | 0.00151 |
| 4.7E-06 | 0.00144 | 0.00153 | -0.0002 | 0.00121 | 0.00127 |
| 4.7E-06 | 0.00216 | 0.00156 | 0.00039 | 0.00052 | 0.00142 |
| 4.7E-06 | 0.0013  | 0.0016  | 5.7E-05 | 0.00099 | 0.00165 |
| 4.8E-06 | 0.00214 | 0.00143 | 0.00097 | 0.00095 | 0.00109 |
| 4.8E-06 | 0.00087 | 0.00172 | 0.00089 | 0.00112 | 0.00027 |
| 4.8E-06 | 0.00149 | 0.00153 | 0.00037 | 0.00055 | 0.00051 |
| 4.9E-06 | 0.00125 | 0.00137 | -0.0003 | 0.00078 | 0.00118 |
| 4.9E-06 | 0.00103 | 0.00174 | 6.9E-05 | 0.0009  | 0.0012  |
| 4.9E-06 | 0.00035 | 0.00191 | -2E-05  | 0.00117 | 0.0011  |
| 5E-06   | 0.00116 | 0.00183 | 0.00024 | 0.00155 | -2E-05  |
| 5E-06   | 0.00135 | 0.00134 | 0.00066 | 0.00115 | 0.00087 |
| 5E-06   | 0.00083 | 0.00174 | 4.2E-05 | 0.00054 | 0.00112 |
| 5.1E-06 | 0.00143 | 0.00164 | -0.0004 | 0.00096 | 0.0007  |
| 5.1E-06 | 0.00251 | 0.00225 | -0.0003 | 0.00125 | 0.00129 |
| 5.1E-06 | 0.00177 | 0.001   | -0.0003 | 0.00082 | 0.00169 |
| 5.2E-06 | 0.00159 | 0.00165 | 8.7E-05 | 0.00093 | 0.00122 |
| 5.2E-06 | 0.00156 | 0.00136 | -5E-05  | 0.00097 | 0.00181 |
| 5.2E-06 | 0.00086 | 0.00195 | 0.00042 | 0.00121 | 0.00115 |
| 5.2E-06 | 0.00157 | 0.00185 | 0.00017 | 0.00168 | 0.00076 |
| 5.3E-06 | 0.001   | 0.00171 | 0.00057 | 0.001   | 0.00128 |
| 5.3E-06 | 0.00153 | 0.00124 | -0.0007 | 0.00068 | 0.00059 |
| 5.3E-06 | 0.00175 | 0.00134 | 0.0008  | 0.00159 | 0.00163 |
| 5.4E-06 | 0.00137 | 0.0019  | 5.4E-05 | 0.00105 | 0.00095 |
| 5.4E-06 | 0.00109 | 0.00088 | -0.0001 | 0.00036 | 0.00095 |
| 5.4E-06 | 0.00182 | 0.00146 | -0.0004 | 0.00107 | 0.00097 |
| 5.5E-06 | 0.00102 | 0.00132 | -0.0005 | 0.00137 | 0.00138 |
| 5.5E-06 | 0.00116 | 0.00142 | -0.0005 | 0.00081 | 0.00187 |
| 5.5E-06 | 0.00149 | 0.00125 | -6E-05  | 0.00086 | 0.00144 |
| 5.6E-06 | 0.00184 | 0.00154 | 0.00051 | 0.00029 | 0.00134 |
| 5.6E-06 | 0.00152 | 0.00117 | 0.00076 | 0.00076 | 0.00095 |
| 5.6E-06 | 0.00211 | 0.00146 | 0.00013 | 0.00143 | 0.00154 |
| 5.7E-06 | 0.00133 | 0.0019  | -0.0002 | 0.00155 | 0.00024 |
| 5.7E-06 | 0.00185 | 0.00136 | 0.00034 | 0.00072 | 0.00082 |
| 5.7E-06 | 0.00118 | 0.00147 | -0.0001 | 0.00164 | 0.00131 |

|         |         |         |         |         |         |
|---------|---------|---------|---------|---------|---------|
| 5.8E-06 | 0.00199 | 0.00201 | -0.0001 | 0.00147 | 0.00081 |
| 5.8E-06 | 0.00227 | 0.00167 | 4.8E-05 | 0.00121 | 0.00095 |
| 5.8E-06 | 0.00132 | 0.00187 | 0.00066 | 0.00193 | 0.00099 |
| 5.9E-06 | 0.00167 | 0.00043 | 0.00061 | -0.0001 | 0.00075 |
| 5.9E-06 | 0.00123 | 0.0019  | -0.0002 | 0.00103 | 0.00093 |
| 5.9E-06 | 0.00179 | 0.00131 | -0.0002 | 0.00077 | 0.00125 |
| 6E-06   | 0.00117 | 0.00174 | -0.0004 | 0.00128 | 0.00078 |
| 6E-06   | 0.00212 | 0.00119 | -0.0004 | 0.00106 | 0.0005  |
| 6E-06   | 0.00157 | 0.00141 | 0.00022 | 0.00129 | 0.00076 |
| 6E-06   | 0.002   | 0.00226 | -6E-06  | 0.00109 | 0.00085 |
| 6.1E-06 | 0.00131 | 0.00169 | 0.00033 | 0.00114 | 0.00131 |
| 6.1E-06 | 0.00133 | 0.00157 | -0.0005 | 4.9E-05 | 0.00145 |
| 6.1E-06 | 0.00199 | 0.00127 | 0.00013 | 0.00025 | 0.00146 |
| 6.2E-06 | 0.00054 | 0.00162 | -0.0001 | 0.0013  | 0.00117 |
| 6.2E-06 | 0.00217 | 0.00166 | 0.00024 | 0.00132 | 0.00176 |
| 6.2E-06 | 0.00147 | 0.00203 | 0.00039 | 0.00022 | 0.00151 |
| 6.3E-06 | 0.00166 | 0.00171 | -0.0006 | 0.00133 | 0.00097 |
| 6.3E-06 | 0.00073 | 0.00093 | -0.0008 | 0.00092 | 5.7E-05 |
| 6.3E-06 | 0.0018  | 0.00081 | -0.0006 | 0.00139 | 0.00113 |
| 6.4E-06 | 0.0018  | 0.00213 | 0.00022 | 0.00125 | 0.00147 |
| 6.4E-06 | 0.00173 | 0.001   | 0.00027 | 0.00103 | 0.00133 |
| 6.4E-06 | 0.0012  | 0.00133 | -0.0001 | 0.00105 | 0.00144 |
| 6.5E-06 | 0.00208 | 0.00142 | 0.00035 | 0.00081 | 0.00094 |
| 6.5E-06 | 0.00193 | 0.00148 | 0.00097 | 0.0011  | 0.00176 |
| 6.5E-06 | 0.00157 | 0.00144 | 0.00084 | 0.00111 | 0.00101 |
| 6.6E-06 | 0.00202 | 0.00132 | -0.0002 | 0.00119 | 0.0015  |
| 6.6E-06 | 0.00115 | 0.00187 | -0.0006 | 0.0014  | 0.001   |
| 6.6E-06 | 0.00212 | 0.00161 | 0.00024 | 0.00168 | 0.00076 |
| 6.7E-06 | 0.00115 | 0.00124 | 0.00023 | 0.00151 | 0.00173 |
| 6.7E-06 | 0.00162 | 0.00035 | 0.00066 | 0.00059 | 0.00117 |
| 6.7E-06 | 0.00162 | 0.00135 | 0.00041 | 0.00107 | 0.00085 |
| 6.8E-06 | 0.00215 | 0.00133 | 0.00037 | 0.00116 | 0.00104 |
| 6.8E-06 | 0.00173 | 0.00118 | -5E-05  | 0.00099 | 0.00099 |
| 6.8E-06 | 0.00124 | 0.00196 | -0.0002 | 0.00128 | 0.00063 |
| 6.8E-06 | 0.00099 | 0.00196 | 0.00021 | 0.001   | 0.00118 |
| 6.9E-06 | 0.00129 | 0.00071 | -0.0001 | 0.00131 | 0.00152 |
| 6.9E-06 | 0.00114 | 0.00152 | 0.00078 | 0.0009  | 0.00098 |
| 6.9E-06 | 0.00149 | 0.00168 | 0.00058 | 0.00153 | 0.0004  |
| 7E-06   | 0.00153 | 0.00141 | 1.7E-05 | 0.00137 | 0.00058 |
| 7E-06   | 0.00097 | 0.00147 | -2E-06  | 0.00137 | 0.00011 |
| 7E-06   | 0.00224 | 0.0018  | -0.0003 | 0.00108 | 0.00146 |
| 7.1E-06 | 0.00109 | 0.00148 | -1E-04  | 0.0011  | 0.00154 |
| 7.1E-06 | 0.00209 | 0.00108 | -1E-04  | 0.00113 | 0.00088 |
| 7.1E-06 | 0.00145 | 0.00159 | 0.00029 | 0.00032 | 0.00106 |
| 7.2E-06 | 0.00154 | 0.00158 | -0.0002 | 0.0008  | 0.00228 |
| 7.2E-06 | 0.00184 | 0.00154 | 0.00019 | 0.00114 | 0.00013 |
| 7.2E-06 | 0.00159 | 0.00114 | 0.00084 | 0.0019  | 0.00089 |
| 7.3E-06 | 0.00121 | 0.00202 | 9.1E-05 | 0.00192 | 0.00044 |
| 7.3E-06 | 0.00198 | 0.00138 | -0.0005 | 0.00108 | 0.00089 |
| 7.3E-06 | 0.00148 | 0.00136 | -0.0007 | 0.00177 | 0.00042 |
| 7.4E-06 | 0.0021  | 0.00085 | -0.0009 | 0.00165 | 0.00098 |
| 7.4E-06 | 0.00199 | 0.00198 | -0.0002 | 0.00136 | 0.0013  |
| 7.4E-06 | 0.00182 | 0.00108 | -0.0002 | 0.00026 | 0.00112 |
| 7.5E-06 | 0.00152 | 0.0014  | -0.0001 | 0.00075 | 0.0014  |



|         |         |         |         |         |         |
|---------|---------|---------|---------|---------|---------|
| 7.5E-06 | 0.00097 | 0.0018  | -0.0002 | 0.00182 | 0.00138 |
| 7.5E-06 | 0.00126 | 0.00188 | -0.0006 | 0.00141 | 0.00014 |
| 7.6E-06 | 0.001   | 0.00139 | 6E-05   | 0.00163 | 0.00015 |
| 7.6E-06 | 0.0007  | 0.00152 | 5.2E-05 | 0.00106 | 0.00059 |
| 7.6E-06 | 0.00157 | 0.00302 | 9.2E-05 | 0.00064 | 0.00129 |
| 7.6E-06 | 0.00151 | 0.00105 | 0.00018 | 0.00122 | 0.00102 |
| 7.7E-06 | 0.00193 | 0.00143 | -0.0004 | 0.00133 | 0.00025 |
| 7.7E-06 | 0.00192 | 0.00162 | 0.00022 | 0.00083 | 0.001   |
| 7.7E-06 | 0.00161 | 0.00176 | 0.00024 | 0.00142 | 8.9E-05 |
| 7.8E-06 | 0.00169 | 0.00223 | -0.0002 | 0.00153 | 0.00089 |
| 7.8E-06 | 0.00099 | 0.00204 | 0.00017 | 0.00126 | 0.00097 |
| 7.8E-06 | 0.0011  | 0.00178 | -0.0003 | 0.0019  | 0.00105 |
| 7.9E-06 | 0.00092 | 0.00175 | 9.3E-06 | 0.00138 | 0.00031 |
| 7.9E-06 | 0.00142 | 0.00167 | 0.00036 | 0.00155 | 0.00101 |
| 7.9E-06 | 0.0017  | 0.00248 | 6.8E-05 | 0.00144 | 0.00036 |
| 8E-06   | 0.00164 | 0.00134 | -0.0006 | 0.00142 | 0.0012  |
| 8E-06   | 0.00154 | 0.00172 | 3E-05   | 0.00155 | 0.00061 |
| 8E-06   | 0.00136 | 0.0012  | 0.0004  | 0.00139 | 0.00131 |
| 8.1E-06 | 0.00114 | 0.0014  | 6.5E-05 | 0.0015  | 0.00107 |
| 8.1E-06 | 0.00216 | 0.0012  | -5E-05  | 0.00077 | 0.00087 |
| 8.1E-06 | 0.00165 | 0.00179 | -0.0004 | 0.00135 | 0.00113 |
| 8.2E-06 | 0.0012  | 0.00106 | 0.00037 | 0.0014  | 0.00127 |
| 8.2E-06 | 0.00104 | 0.00214 | 1.2E-05 | 0.00082 | 0.00055 |
| 8.2E-06 | 0.00141 | 0.00179 | 7.8E-05 | 0.00128 | 0.00126 |
| 8.3E-06 | 0.00113 | 0.00122 | -0.0002 | 0.00073 | 0.00148 |
| 8.3E-06 | 0.00148 | 0.00181 | -0.0001 | 0.00155 | 0.0006  |
| 8.3E-06 | 0.00088 | 0.00179 | -0.0001 | 0.00058 | 0.00099 |
| 8.4E-06 | 0.00152 | 0.00154 | -7E-05  | 0.00085 | 0.00079 |
| 8.4E-06 | 0.00163 | 0.00169 | -0.0007 | 0.00034 | 0.00056 |
| 8.4E-06 | 0.00194 | 0.00147 | 3.8E-05 | 0.00093 | 0.0007  |
| 8.4E-06 | 0.00119 | 0.00129 | 0.00047 | 0.001   | 0.00102 |
| 8.5E-06 | 0.00168 | 0.00197 | -7E-05  | 0.00147 | 0.00067 |
| 8.5E-06 | 0.00154 | 0.0014  | 0.00022 | 0.00104 | 0.00108 |
| 8.5E-06 | 0.00134 | 0.00164 | -0.0004 | 0.00147 | 0.00089 |
| 8.6E-06 | 0.00166 | 0.00186 | -0.0002 | 0.00097 | 0.00104 |
| 8.6E-06 | 0.00132 | 0.0019  | -6E-05  | 0.00093 | 0.0008  |
| 8.6E-06 | 0.00176 | 0.00133 | 0.00051 | 0.0012  | 0.00091 |
| 8.7E-06 | 0.00177 | 0.00174 | 2.5E-05 | 0.00121 | 0.00039 |
| 8.7E-06 | 0.00168 | 0.00162 | 8.7E-05 | 0.0013  | 0.00135 |
| 8.7E-06 | 0.00143 | 0.00153 | -2E-05  | 0.00097 | 0.00086 |
| 8.8E-06 | 0.0012  | 0.00167 | -0.0004 | 0.00105 | 0.00145 |
| 8.8E-06 | 0.0015  | 0.0011  | -5E-05  | 0.00087 | 0.00073 |
| 8.8E-06 | 0.0017  | 0.00162 | -8E-05  | 0.00083 | 0.00051 |
| 8.9E-06 | 0.0017  | 0.00104 | 7.7E-05 | 0.00124 | 0.00112 |
| 8.9E-06 | 0.00091 | 0.00087 | -0.0002 | 0.00119 | 0.0011  |
| 8.9E-06 | 0.00148 | 0.002   | -0.0002 | 0.00103 | 3.1E-05 |
| 9E-06   | 0.00069 | 0.00117 | -0.0007 | 0.00062 | -0.0002 |
| 9E-06   | 0.00175 | 0.00176 | 0.00038 | 0.00108 | 0.00086 |
| 9E-06   | 0.00197 | 0.002   | 0.00015 | 0.00075 | 0.00118 |
| 9.1E-06 | 0.00264 | 0.00186 | -0.0003 | 0.00141 | 0.0013  |
| 9.1E-06 | 0.00167 | 0.00184 | -0.0002 | 0.00124 | 0.00071 |
| 9.1E-06 | 0.00066 | 0.0017  | -0.0004 | 0.00159 | 0.00066 |
| 9.2E-06 | 0.00132 | 0.00201 | -0.0004 | 0.00142 | 0.00053 |
| 9.2E-06 | 0.00133 | 0.00186 | -0.0004 | 0.00142 | 0.0013  |

|         |         |         |         |         |         |
|---------|---------|---------|---------|---------|---------|
| 9.2E-06 | 0.00077 | 0.00154 | -0.0002 | 0.00086 | 0.00096 |
| 9.2E-06 | 0.00144 | 0.00179 | -0.0002 | 0.00136 | 0.00048 |
| 9.3E-06 | 0.00099 | 0.00165 | -0.0006 | 0.00104 | 0.00063 |
| 9.3E-06 | 0.0013  | 0.00183 | -0.0002 | 0.00145 | 0.00122 |
| 9.3E-06 | 0.00221 | 0.00127 | -0.0005 | 0.001   | 0.00023 |
| 9.4E-06 | 0.00192 | 0.00126 | 0.0006  | 0.00101 | 0.00016 |
| 9.4E-06 | 0.0017  | 0.00126 | 4.1E-06 | 0.00153 | 0.00058 |
| 9.4E-06 | 0.0014  | 0.00156 | 0.00075 | 0.00065 | -0.0001 |
| 9.5E-06 | 0.00118 | 0.00212 | 8.3E-05 | 0.00072 | 0.00132 |
| 9.5E-06 | 0.00156 | 0.00102 | -0.0006 | 0.00097 | 0.00106 |
| 9.5E-06 | 0.00157 | 0.00251 | 0.00011 | 0.00132 | 0.00154 |
| 9.6E-06 | 0.00112 | 0.00179 | -0.0005 | 0.00097 | 0.00132 |
| 9.6E-06 | 0.00147 | 0.00135 | -7E-05  | 0.00097 | 0.00106 |
| 9.6E-06 | 0.00182 | 0.0014  | 0.00029 | 0.00019 | 0.00059 |
| 9.7E-06 | 0.00212 | 0.00163 | -0.0003 | 0.00051 | 0.00088 |
| 9.7E-06 | 0.00138 | 0.00158 | -0.0007 | 0.00059 | 0.00098 |
| 9.7E-06 | 0.00182 | 0.00183 | 0.00013 | 0.0004  | 0.00048 |
| 9.8E-06 | 0.00205 | 0.00191 | -9E-06  | 0.00081 | 0.00045 |
| 9.8E-06 | 0.00116 | 0.00124 | 0.00031 | 0.00025 | 0.00092 |
| 9.8E-06 | 0.00159 | 0.00133 | -0.0003 | 0.00133 | 0.00099 |
| 9.9E-06 | 0.00171 | 0.00186 | -0.0007 | 0.00114 | 0.00041 |
| 9.9E-06 | 0.0015  | 0.0016  | -0.0007 | 0.00094 | 0.00085 |
| 9.9E-06 | 0.002   | 0.0018  | -0.0002 | 0.00085 | 0.00131 |
| 1E-05   | 0.00173 | 0.00108 | -0.0002 | 0.00093 | 0.00092 |
| 1E-05   | 0.00097 | 0.0017  | -0.0002 | 0.00125 | 0.00029 |
| 1E-05   | 0.00123 | 0.00235 | 0.00014 | 0.00216 | 0.00041 |
| 1E-05   | 0.00128 | 0.00183 | 0.00023 | 0.00088 | 0.00161 |
| 1E-05   | 0.00054 | 0.00118 | -0.0006 | 0.00032 | -7E-06  |
| 1E-05   | 0.00177 | 0.00168 | -0.0006 | 0.00177 | 0.00091 |
| 1E-05   | 0.00152 | 0.00184 | 0.00027 | 0.00124 | 0.00086 |
| 1E-05   | 0.00138 | 0.00109 | -0.0002 | 0.00139 | 0.00041 |
| 1E-05   | 0.00041 | 0.00236 | -0.0003 | 0.00151 | 0.00117 |
| 1E-05   | 0.00163 | 0.00103 | -0.0009 | 0.00061 | 0.00084 |
| 1E-05   | 0.001   | 0.00093 | -0.0003 | 0.00135 | 0.0008  |
| 1E-05   | 0.00107 | 0.00268 | -0.0005 | 0.00135 | 0.00049 |
| 1E-05   | 0.00147 | 0.00218 | -9E-05  | 0.00162 | 0.0007  |
| 1E-05   | 0.002   | 0.00092 | -0.0001 | 0.00189 | 0.0009  |
| 1E-05   | 0.00081 | 0.0015  | -2E-05  | 0.00122 | 0.00118 |
| 1E-05   | 0.00117 | 0.002   | 0.00016 | 0.0013  | 0.00053 |
| 1E-05   | 0.00053 | 0.00158 | -0.0005 | 0.00124 | 0.00114 |
| 1.1E-05 | 0.00126 | 0.00097 | -0.0003 | 0.00055 | 0.0013  |
| 1.1E-05 | 0.00049 | 0.00127 | -0.0004 | 0.00124 | 0.00099 |
| 1.1E-05 | 0.00163 | 0.00136 | -0.0007 | 0.00117 | 0.00137 |
| 1.1E-05 | 0.00069 | 0.00121 | -0.0006 | 0.00136 | 0.00123 |
| 1.1E-05 | 0.0012  | 0.00129 | -0.0008 | 0.0012  | 0.00112 |
| 1.1E-05 | 0.00178 | 0.00128 | -0.0003 | 0.00114 | 0.00111 |
| 1.1E-05 | 0.00125 | 0.00142 | -0.0008 | 0.00101 | 0.00059 |
| 1.1E-05 | 0.00161 | 0.00204 | -0.0005 | 0.00207 | 9E-05   |
| 1.1E-05 | 0.00222 | 0.00127 | -0.0002 | 0.00057 | 0.00075 |
| 1.1E-05 | 0.00255 | 0.00085 | 0.00054 | 0.00132 | 0.00025 |
| 1.1E-05 | 0.00089 | 0.00108 | 0.00011 | 0.00024 | 0.00044 |
| 1.1E-05 | 0.00136 | 0.00137 | 4.4E-05 | 0.00044 | 9.5E-05 |
| 1.1E-05 | 0.00172 | 0.00107 | -0.001  | 0.00183 | 0.00105 |
| 1.1E-05 | 0.00155 | 0.00196 | 0.00027 | 0.00143 | 0.00107 |

|         |         |         |         |         |         |
|---------|---------|---------|---------|---------|---------|
| 1.1E-05 | 0.00164 | 0.00116 | -0.0006 | 0.00147 | 0.00065 |
| 1.1E-05 | 0.00131 | 0.00166 | -0.0002 | 0.00165 | 0.00119 |
| 1.1E-05 | 0.00192 | 0.00149 | -0.0002 | 0.00082 | 0.0008  |
| 1.1E-05 | 0.00202 | 0.0011  | -0.0003 | 0.00159 | 0.00073 |
| 1.1E-05 | 0.00182 | 0.00174 | -0.0006 | 0.00209 | 0.00098 |
| 1.1E-05 | 0.00143 | 0.00092 | -0.0006 | 0.0017  | 0.00086 |
| 1.1E-05 | 0.00164 | 0.00107 | -0.001  | 0.00126 | 0.00061 |
| 1.1E-05 | 0.00134 | 0.00109 | -0.0005 | 0.00155 | 0.00131 |
| 1.1E-05 | 0.00137 | 0.00147 | -0.0003 | 0.00077 | 0.00063 |
| 1.1E-05 | 0.00164 | 0.00102 | 0.00064 | 0.00022 | 0.00056 |
| 1.1E-05 | 0.00116 | 0.00155 | -0.0009 | 0.00072 | -2E-05  |
| 1.1E-05 | 0.00145 | 0.00096 | -0.0002 | 0.00151 | 0.00083 |
| 1.1E-05 | 0.00096 | 0.00136 | -0.0002 | 0.00106 | -0.0001 |
| 1.1E-05 | 0.00128 | 0.00188 | -3E-05  | 0.00189 | 0.00056 |
| 1.1E-05 | 0.00091 | 0.00191 | -0.0004 | 0.00032 | 0.00067 |
| 1.1E-05 | 0.00091 | 0.00129 | -0.0004 | 0.00112 | 0.00046 |
| 1.1E-05 | 0.00135 | 0.00109 | -0.0003 | 0.00147 | 0.00038 |
| 1.1E-05 | 0.00179 | 0.00166 | -0.0006 | 0.0013  | -5E-05  |
| 1.2E-05 | 0.00103 | 0.00194 | -0.0005 | 0.00112 | 0.00049 |
| 1.2E-05 | 0.00117 | 0.00182 | -0.0008 | 0.0012  | 0.0005  |
| 1.2E-05 | 0.00177 | 0.00108 | -0.0001 | 0.00161 | -5E-06  |
| 1.2E-05 | 0.00165 | 0.00149 | -3E-05  | 0.00108 | 3.1E-05 |
| 1.2E-05 | 0.00101 | 0.00173 | -0.0005 | 0.00087 | 0.00033 |
| 1.2E-05 | 0.00079 | 0.00164 | 0.00048 | 0.00116 | 0.00056 |
| 1.2E-05 | 0.00125 | 0.00154 | 0.00048 | 0.00249 | 0.00078 |
| 1.2E-05 | 0.00216 | 0.00085 | 0.0003  | 0.0011  | -0.0004 |
| 1.2E-05 | 0.00154 | 0.00184 | -0.0004 | 0.00091 | -0.0003 |
| 1.2E-05 | 0.00125 | 0.00248 | -0.0001 | 0.00042 | 0.00043 |
| 1.2E-05 | 0.0011  | 0.00164 | -0.0006 | 0.00137 | 0.00017 |
| 1.2E-05 | 0.00143 | 0.00154 | -0.0005 | 0.00071 | 0.00032 |
| 1.2E-05 | 0.00097 | 0.00174 | -0.0011 | 0.00127 | 0.00096 |
| 1.2E-05 | 0.00166 | 0.00135 | -0.0003 | 0.00035 | 0.00077 |
| 1.2E-05 | 0.00163 | 0.00144 | -7E-05  | 0.00114 | 0.0009  |
| 1.2E-05 | 0.00158 | 0.00116 | -0.0009 | 0.00193 | 0.00111 |
| 1.2E-05 | 0.00123 | 0.00123 | 9.7E-05 | 0.00208 | 0.00092 |
| 1.2E-05 | 0.00056 | 0.00202 | -0.0008 | 0.00132 | 0.00109 |
| 1.2E-05 | 0.00132 | 0.00163 | 0.00023 | 0.00139 | 0.00047 |
| 1.2E-05 | 0.00116 | 0.0011  | -0.0004 | 0.00058 | 0.00084 |
| 1.2E-05 | 0.00075 | 0.00235 | -0.0002 | 0.00128 | 0.00084 |
| 1.2E-05 | 0.00095 | 0.00247 | 0.00027 | 0.00122 | 0.00034 |
| 1.2E-05 | 0.00019 | 0.00212 | 0.00044 | 0.00081 | 0.00077 |
| 1.2E-05 | 9.3E-05 | 0.00172 | 7.6E-05 | 0.00214 | 0.00051 |
| 1.2E-05 | 0.00133 | 0.0011  | 2.4E-05 | 0.00151 | 0.00067 |
| 1.2E-05 | 0.0008  | 0.00128 | 2.2E-05 | 0.00064 | 0.00038 |
| 1.2E-05 | 0.00134 | 0.00231 | -0.0008 | 0.00125 | 0.0004  |
| 1.2E-05 | 0.00081 | 0.00199 | -0.0003 | 0.00165 | 0.00068 |
| 1.2E-05 | 0.00117 | 0.00148 | -0.0003 | 0.00091 | 0.00016 |
| 1.2E-05 | 0.00181 | 0.00135 | -0.0002 | 0.00136 | 0.00111 |
| 1.2E-05 | 0.00072 | 0.00171 | -0.0011 | 0.00101 | 0.00043 |
| 1.3E-05 | 0.00103 | 0.00163 | 3E-05   | 0.00118 | 0.00012 |
| 1.3E-05 | 0.00129 | 0.00109 | 0.0005  | 0.00116 | 0.0004  |
| 1.3E-05 | 0.00068 | 0.00201 | 5.5E-05 | 0.00188 | 0.00099 |
| 1.3E-05 | 0.00105 | 0.00133 | -0.0003 | 0.00135 | 0.00043 |
| 1.3E-05 | 0.00153 | 0.00109 | -0.0003 | 0.00143 | 0.00024 |

|         |         |         |         |         |         |
|---------|---------|---------|---------|---------|---------|
| 1.3E-05 | 0.00146 | 0.00109 | -0.0007 | 0.00143 | 0.00071 |
| 1.3E-05 | 0.00135 | 0.00185 | -0.0008 | 0.00051 | 0.00027 |
| 1.3E-05 | 0.00061 | 0.0012  | -0.0009 | 0.00193 | 0.00073 |
| 1.3E-05 | 0.00127 | 0.0023  | 3E-05   | 0.00173 | 0.00098 |
| 1.3E-05 | 0.00175 | 0.00171 | -0.0004 | 0.00136 | -0.0002 |
| 1.3E-05 | 0.00117 | 0.00222 | -0.0003 | 0.00145 | 0.00021 |
| 1.3E-05 | 0.00119 | 0.001   | 0.00056 | 0.00101 | 0.00071 |
| 1.3E-05 | 0.00132 | 0.00155 | -0.0002 | 0.00185 | 0.00058 |
| 1.3E-05 | 0.00183 | 0.00127 | 3.6E-05 | 0.00124 | 0.00118 |
| 1.3E-05 | 0.00149 | 0.00134 | -0.0003 | 0.00156 | 0.00047 |
| 1.3E-05 | 0.00121 | 0.00164 | -0.0001 | 0.00132 | 0.00092 |
| 1.3E-05 | 0.00163 | 0.00161 | 0.00062 | 0.00109 | 0.00175 |
| 1.3E-05 | 0.00218 | 0.00128 | -0.0003 | 0.00071 | 0.00098 |
| 1.3E-05 | 0.00114 | 0.00163 | -0.0007 | 0.00117 | 0.00065 |
| 1.3E-05 | 0.00118 | 0.00146 | 0.00016 | 0.00145 | 0.00032 |
| 1.3E-05 | 0.0012  | 0.00129 | 3.7E-05 | 0.00018 | 0.00087 |
| 1.3E-05 | 0.00107 | 0.00128 | -0.0004 | 0.00125 | -6E-05  |
| 1.3E-05 | 0.00115 | 0.00171 | -0.0007 | 0.00144 | 0.00051 |
| 1.3E-05 | 0.00187 | 0.00176 | 2.5E-05 | 0.00184 | 0.00087 |
| 1.3E-05 | 0.00152 | 0.0011  | -0.0002 | 0.00124 | 0.00058 |
| 1.3E-05 | 0.00113 | 0.00202 | -0.0002 | 0.00115 | 0.00093 |
| 1.3E-05 | 0.00073 | 0.00115 | -0.001  | 0.00095 | 0.00083 |
| 1.3E-05 | 0.00132 | 0.00085 | -0.0009 | 0.00144 | -0.0004 |
| 1.3E-05 | 0.00118 | 0.00185 | 0.0003  | 0.00101 | 0.00029 |
| 1.3E-05 | 0.00131 | 0.00176 | 5.9E-05 | 0.00059 | 0.00031 |
| 1.3E-05 | 0.00112 | 0.00166 | 0.00024 | 0.00133 | 6.3E-05 |
| 1.4E-05 | 0.00094 | 0.00135 | -0.0006 | 0.00162 | 0.00045 |
| 1.4E-05 | 0.00048 | 0.00168 | -0.0002 | 0.00102 | 0.00045 |
| 1.4E-05 | 0.0012  | 0.00203 | -0.0002 | 0.0016  | 0.00126 |
| 1.4E-05 | 0.00187 | 0.00244 | -0.0002 | 0.00127 | 0.00035 |
| 1.4E-05 | 0.00161 | 0.00154 | -0.0004 | 0.00099 | 0.00081 |
| 1.4E-05 | 0.00161 | 0.00149 | 2.4E-07 | 0.00196 | 0.00063 |
| 1.4E-05 | 0.00214 | 0.00154 | 3.1E-05 | 0.00088 | 0.00077 |
| 1.4E-05 | 0.00049 | 0.00197 | -0.0005 | 0.00103 | 0.00086 |
| 1.4E-05 | 0.00103 | 0.0007  | -0.0004 | 0.00063 | 0.001   |
| 1.4E-05 | 0.00117 | 0.00194 | -0.0008 | 0.00087 | 0.00021 |
| 1.4E-05 | 0.00119 | 0.00205 | -0.0007 | 0.00047 | 0.00036 |
| 1.4E-05 | 0.0016  | 0.00158 | -0.0003 | 0.00114 | 0.0009  |
| 1.4E-05 | 0.00137 | 0.00163 | -4E-05  | 0.00158 | 0.00029 |
| 1.4E-05 | 0.00091 | 0.0016  | 0.00066 | 0.00135 | 0.00022 |
| 1.4E-05 | 0.00141 | 0.00157 | 0.00055 | 0.0009  | 0.00106 |
| 1.4E-05 | 0.00144 | 0.00121 | -0.0002 | 0.00095 | 2.1E-05 |
| 1.4E-05 | 0.00077 | 0.0011  | -0.0006 | 0.0015  | 0.00048 |
| 1.4E-05 | 0.00068 | 0.00084 | 0.0005  | 0.00094 | 0.001   |
| 1.4E-05 | 0.00168 | 0.00132 | -0.0006 | 0.00129 | 0.00088 |
| 1.4E-05 | 0.00071 | 0.00091 | 0.00016 | 0.00085 | 0.00131 |
| 1.4E-05 | 0.00172 | 0.00149 | 0.00062 | 0.00088 | 0.00055 |
| 1.4E-05 | 0.00202 | 0.00205 | 0.00089 | 0.0009  | 0.00107 |
| 1.4E-05 | 0.00189 | 0.00189 | -0.0007 | 0.00105 | 0.00072 |
| 1.4E-05 | 0.00146 | 0.00106 | -0.0007 | 0.0015  | 0.00114 |
| 1.4E-05 | 0.00176 | 0.0015  | -0.0007 | 0.00153 | 0.0006  |
| 1.4E-05 | 0.00162 | 0.00129 | 4.9E-06 | 0.00075 | 0.00063 |
| 1.4E-05 | 0.00051 | 0.00216 | -0.0004 | 0.00071 | 0.00033 |
| 1.4E-05 | 0.00135 | 0.00086 | 0.00025 | 0.00197 | 2.8E-05 |

|         |         |         |         |         |         |
|---------|---------|---------|---------|---------|---------|
| 1.4E-05 | 0.00113 | 0.00116 | -0.0005 | 0.00144 | 0.00064 |
| 1.4E-05 | 0.00162 | 0.00095 | -0.0005 | 0.00184 | 0.00075 |
| 1.4E-05 | 0.00159 | 0.00205 | 0.00016 | 0.00114 | 0.00142 |
| 1.5E-05 | 0.00052 | 0.00115 | -0.0003 | 0.00063 | 0.00139 |
| 1.5E-05 | 0.00223 | 0.00119 | -0.0005 | 0.0012  | 0.00109 |
| 1.5E-05 | 0.00134 | 0.00112 | -0.0004 | 0.00155 | 0.00041 |
| 1.5E-05 | 0.002   | 0.00179 | 0.00049 | 0.00096 | 0.00099 |
| 1.5E-05 | 0.00151 | 0.00121 | -0.0003 | 0.00093 | 0.00101 |
| 1.5E-05 | 0.00148 | 0.0014  | -0.001  | 0.00131 | 0.00126 |
| 1.5E-05 | 0.00097 | 0.0015  | 8.6E-05 | 0.00157 | -0.0007 |
| 1.5E-05 | 0.00174 | 0.00134 | -3E-05  | 0.001   | 0.00046 |
| 1.5E-05 | 0.00143 | 0.00097 | 0.00032 | 0.00103 | -0.0006 |
| 1.5E-05 | 0.00059 | 0.00187 | -0.001  | 0.00068 | 0.00068 |
| 1.5E-05 | 0.00137 | 0.00135 | -0.0004 | 0.00139 | 0.00091 |
| 1.5E-05 | 0.00127 | 0.00177 | -0.0002 | 0.00068 | 0.00095 |
| 1.5E-05 | 0.00122 | 0.00134 | 0.00015 | 0.00129 | -0.0005 |
| 1.5E-05 | 0.00112 | 0.00153 | -0.0008 | 0.00108 | 0.0008  |
| 1.5E-05 | 0.00109 | 0.00183 | -0.001  | 0.00116 | 0.00026 |
| 1.5E-05 | 0.00151 | 0.002   | -0.0001 | 0.00067 | 0.00012 |

**Table SI.9:** Primary kinetic data for the reaction of 1-methyl-2-piperidinone (**S9**) with CumO• generated by 355 nm LFP in MeCN (**Figure SI.9**).

| t / s   | $\Delta A$ 1-methyl-2-piperidinone ( <b>S9</b> ) |               |               |               |               |
|---------|--------------------------------------------------|---------------|---------------|---------------|---------------|
|         | <b>0.044M</b>                                    | <b>0.109M</b> | <b>0.215M</b> | <b>0.319M</b> | <b>0.421M</b> |
| -1E-06  | -0.0014                                          | -0.0002       | -0.0002       | -0.0005       | 0.00059       |
| -1E-06  | -0.0008                                          | -0.0005       | 0.00112       | -0.0003       | 0.00012       |
| -9E-07  | -0.0005                                          | -0.0004       | 0.00011       | -0.0006       | 0.00035       |
| -9E-07  | -0.0005                                          | 0.00053       | 0.00076       | -0.0008       | 0.00035       |
| -9E-07  | -0.0011                                          | -0.0005       | 0.00051       | -0.0014       | -0.0002       |
| -8E-07  | -0.0007                                          | 3.9E-05       | 0.00067       | -0.0006       | -0.0003       |
| -8E-07  | -0.0011                                          | 0.00071       | 0.00012       | -0.0009       | -0.0001       |
| -8E-07  | -0.0007                                          | -0.0008       | 0.00091       | -0.0002       | 0.00049       |
| -7E-07  | -0.0009                                          | 0.0006        | 0.00104       | -0.0009       | 1.1E-05       |
| -7E-07  | -0.0012                                          | 0.00031       | 0.00084       | -0.0004       | -0.0003       |
| -7E-07  | -0.0009                                          | -0.0002       | 0.00082       | -0.001        | 6E-06         |
| -6E-07  | -0.0012                                          | 0.0007        | 0.00091       | -0.0014       | 0.0015        |
| -6E-07  | -0.0008                                          | -0.0002       | 0.00163       | -0.0002       | -2E-05        |
| -6E-07  | -0.001                                           | 0.0007        | 0.0005        | -0.0008       | -3E-05        |
| -5E-07  | -0.0007                                          | 0.00013       | 0.00036       | -0.001        | 0.00038       |
| -5E-07  | -0.0018                                          | 6E-05         | 0.00129       | -0.0009       | 0.00011       |
| -5E-07  | -0.0012                                          | -0.0003       | 0.00093       | -0.0007       | 0.00061       |
| -4E-07  | -0.0009                                          | 0.00094       | 0.00076       | -0.0004       | -0.0008       |
| -4E-07  | -0.0011                                          | -0.0001       | 0.00022       | -0.0006       | -0.0004       |
| -4E-07  | -0.0006                                          | -0.0002       | -0.0001       | -0.0008       | 0.00056       |
| -4E-07  | -0.0013                                          | -0.0003       | 0.00028       | -0.0015       | 1.9E-05       |
| -3E-07  | -0.0011                                          | 0.00028       | 0.00081       | -0.0012       | 0.00046       |
| -3E-07  | -0.0013                                          | 0.00014       | 0.0002        | -0.0009       | -0.0005       |
| -3E-07  | -0.0013                                          | -0.0006       | 0.00075       | -0.0014       | 0.00039       |
| -2E-07  | -0.0011                                          | 0.00016       | 0.00082       | -0.0011       | 0.00037       |
| -2E-07  | -0.0007                                          | 0.00011       | 0.00059       | 0.00022       | 0.00114       |
| -2E-07  | -0.0002                                          | -0.0006       | 0.0011        | -0.0009       | 0.00038       |
| -1E-07  | -0.0009                                          | 7.7E-05       | 0.00023       | -5E-05        | 0.00037       |
| -1E-07  | -0.0009                                          | -0.0006       | 0.00028       | 0.00019       | 3E-05         |
| -6E-08  | -0.0004                                          | 0.00028       | 0.00111       | -0.0009       | 0.00042       |
| -3E-08  | -0.001                                           | 0.00077       | 0.00056       | -0.0013       | 0.00043       |
| -2E-10  | -0.0035                                          | -0.0034       | -0.0029       | -0.0038       | -0.0041       |
| 3.2E-08 | -0.0092                                          | -0.011        | -0.0183       | -0.0171       | -0.0193       |
| 6.4E-08 | 0.01844                                          | 0.01818       | 0.01435       | 0.01174       | 0.00856       |
| 9.6E-08 | 0.02018                                          | 0.02386       | 0.02304       | 0.02239       | 0.02148       |
| 1.3E-07 | 0.01962                                          | 0.0221        | 0.02287       | 0.02121       | 0.02208       |
| 1.6E-07 | 0.01897                                          | 0.02114       | 0.02108       | 0.02039       | 0.02003       |
| 1.9E-07 | 0.01816                                          | 0.02059       | 0.02015       | 0.01873       | 0.01875       |
| 2.2E-07 | 0.01795                                          | 0.021         | 0.02016       | 0.01846       | 0.01749       |
| 2.6E-07 | 0.01662                                          | 0.01851       | 0.01832       | 0.01667       | 0.01628       |
| 2.9E-07 | 0.01637                                          | 0.01796       | 0.01842       | 0.01557       | 0.01527       |
| 3.2E-07 | 0.01573                                          | 0.01857       | 0.01709       | 0.01426       | 0.01367       |
| 3.5E-07 | 0.01546                                          | 0.01748       | 0.01598       | 0.01303       | 0.01358       |
| 3.8E-07 | 0.01444                                          | 0.01574       | 0.01469       | 0.01292       | 0.01269       |
| 4.2E-07 | 0.0141                                           | 0.01573       | 0.01425       | 0.01299       | 0.0112        |
| 4.5E-07 | 0.01379                                          | 0.01507       | 0.01387       | 0.01107       | 0.01096       |
| 4.8E-07 | 0.01391                                          | 0.01445       | 0.01255       | 0.01085       | 0.01011       |
| 5.1E-07 | 0.01251                                          | 0.01326       | 0.01304       | 0.01079       | 0.00885       |
| 5.4E-07 | 0.01291                                          | 0.01387       | 0.01112       | 0.01006       | 0.00913       |

|         |         |         |         |         |         |
|---------|---------|---------|---------|---------|---------|
| 5.8E-07 | 0.01232 | 0.01277 | 0.01104 | 0.0089  | 0.00822 |
| 6.1E-07 | 0.01128 | 0.01169 | 0.01016 | 0.00772 | 0.00785 |
| 6.4E-07 | 0.01131 | 0.0114  | 0.00993 | 0.00801 | 0.00778 |
| 6.7E-07 | 0.01103 | 0.01126 | 0.00985 | 0.00708 | 0.00697 |
| 7E-07   | 0.01085 | 0.01068 | 0.00858 | 0.00691 | 0.00852 |
| 7.4E-07 | 0.00984 | 0.01001 | 0.00838 | 0.00649 | 0.00708 |
| 7.7E-07 | 0.00996 | 0.00994 | 0.00844 | 0.0065  | 0.00726 |
| 8E-07   | 0.00978 | 0.01072 | 0.0086  | 0.00598 | 0.00636 |
| 8.3E-07 | 0.00879 | 0.01028 | 0.00701 | 0.00542 | 0.00565 |
| 8.6E-07 | 0.0097  | 0.00958 | 0.00757 | 0.00521 | 0.00583 |
| 9E-07   | 0.00797 | 0.00898 | 0.00711 | 0.00501 | 0.00587 |
| 9.3E-07 | 0.00832 | 0.00845 | 0.00718 | 0.00429 | 0.00524 |
| 9.6E-07 | 0.00878 | 0.00731 | 0.00624 | 0.00496 | 0.00543 |
| 9.9E-07 | 0.00814 | 0.00854 | 0.0064  | 0.0047  | 0.00558 |
| 1E-06   | 0.00722 | 0.00668 | 0.00623 | 0.00374 | 0.00497 |
| 1.1E-06 | 0.00709 | 0.00794 | 0.00511 | 0.00301 | 0.00402 |
| 1.1E-06 | 0.00733 | 0.00713 | 0.00631 | 0.00378 | 0.004   |
| 1.1E-06 | 0.00634 | 0.00756 | 0.00536 | 0.00359 | 0.00412 |
| 1.2E-06 | 0.00719 | 0.00722 | 0.00545 | 0.00258 | 0.00412 |
| 1.2E-06 | 0.00563 | 0.00595 | 0.00557 | 0.00337 | 0.00448 |
| 1.2E-06 | 0.00589 | 0.00629 | 0.00525 | 0.00382 | 0.00386 |
| 1.2E-06 | 0.00626 | 0.00631 | 0.00485 | 0.00213 | 0.00443 |
| 1.3E-06 | 0.00604 | 0.00508 | 0.0045  | 0.00242 | 0.00474 |
| 1.3E-06 | 0.00529 | 0.00535 | 0.00542 | 0.00258 | 0.00385 |
| 1.3E-06 | 0.00572 | 0.00541 | 0.00399 | 0.00205 | 0.00496 |
| 1.4E-06 | 0.00557 | 0.00533 | 0.00454 | 0.0016  | 0.00382 |
| 1.4E-06 | 0.00452 | 0.00451 | 0.00363 | 0.00268 | 0.00424 |
| 1.4E-06 | 0.00494 | 0.00453 | 0.00443 | 0.00163 | 0.00364 |
| 1.5E-06 | 0.00408 | 0.00338 | 0.00391 | 0.00183 | 0.00376 |
| 1.5E-06 | 0.00467 | 0.00381 | 0.00474 | 0.00257 | 0.00328 |
| 1.5E-06 | 0.00495 | 0.00485 | 0.00362 | 0.00156 | 0.00397 |
| 1.6E-06 | 0.00454 | 0.00453 | 0.0048  | 0.00176 | 0.0032  |
| 1.6E-06 | 0.00464 | 0.00488 | 0.00308 | 0.00239 | 0.0032  |
| 1.6E-06 | 0.00405 | 0.00426 | 0.00409 | 0.00109 | 0.00327 |
| 1.7E-06 | 0.00399 | 0.00386 | 0.00289 | 0.00204 | 0.00352 |
| 1.7E-06 | 0.00467 | 0.0041  | 0.00361 | 0.00203 | 0.00376 |
| 1.7E-06 | 0.00349 | 0.0029  | 0.00372 | 0.00135 | 0.00224 |
| 1.8E-06 | 0.00337 | 0.00353 | 0.00301 | 0.00217 | 0.00271 |
| 1.8E-06 | 0.00447 | 0.00308 | 0.00282 | 0.00227 | 0.00289 |
| 1.8E-06 | 0.00328 | 0.00325 | 0.003   | 0.00149 | 0.00283 |
| 1.9E-06 | 0.00306 | 0.00316 | 0.00288 | 0.00241 | 0.0023  |
| 1.9E-06 | 0.00295 | 0.00327 | 0.0036  | 0.0012  | 0.00327 |
| 1.9E-06 | 0.00419 | 0.00297 | 0.00226 | 0.0007  | 0.00373 |
| 2E-06   | 0.00353 | 0.00373 | 0.00311 | 0.00153 | 0.00325 |
| 2E-06   | 0.00313 | 0.00228 | 0.00271 | 0.00165 | 0.00301 |
| 2E-06   | 0.00348 | 0.00254 | 0.00347 | 0.00098 | 0.00304 |
| 2E-06   | 0.00365 | 0.0026  | 0.0032  | 0.00121 | 0.00222 |
| 2.1E-06 | 0.00265 | 0.00211 | 0.00335 | 0.00141 | 0.00262 |
| 2.1E-06 | 0.00181 | 0.00239 | 0.00298 | 0.00172 | 0.00279 |
| 2.1E-06 | 0.00287 | 0.00291 | 0.0028  | 0.0004  | 0.00216 |
| 2.2E-06 | 0.00303 | 0.00183 | 0.00272 | 0.0014  | 0.00284 |
| 2.2E-06 | 0.00242 | 0.00248 | 0.0029  | 0.00064 | 0.00231 |
| 2.2E-06 | 0.00183 | 0.00257 | 0.00222 | 0.00084 | 0.0023  |
| 2.3E-06 | 0.00178 | 0.00231 | 0.00298 | 0.0012  | 0.00354 |

|         |         |         |         |         |         |
|---------|---------|---------|---------|---------|---------|
| 2.3E-06 | 0.00193 | 0.00227 | 0.00276 | 0.00109 | 0.00308 |
| 2.3E-06 | 0.00173 | 0.00264 | 0.00308 | 0.00066 | 0.00166 |
| 2.4E-06 | 0.00168 | 0.00355 | 0.00218 | 0.00143 | 0.00347 |
| 2.4E-06 | 0.00164 | 0.00252 | 0.00231 | 0.00151 | 0.00295 |
| 2.4E-06 | 0.00147 | 0.00219 | 0.0022  | 0.00176 | 0.00253 |
| 2.5E-06 | 0.00201 | 0.0017  | 0.00224 | 0.00172 | 0.00404 |
| 2.5E-06 | 0.00201 | 0.00219 | 0.00258 | 0.00137 | 0.0031  |
| 2.5E-06 | 0.00187 | 0.00349 | 0.00192 | 0.0008  | 0.00285 |
| 2.6E-06 | 0.00201 | 0.00251 | 0.00268 | 0.00214 | 0.00235 |
| 2.6E-06 | 0.00133 | 0.00116 | 0.00289 | 0.00084 | 0.00264 |
| 2.6E-06 | 0.0004  | 0.00254 | 0.00196 | 0.00085 | 0.00217 |
| 2.7E-06 | 0.00148 | 0.00241 | 0.00201 | 0.00142 | 0.00283 |
| 2.7E-06 | 0.00141 | 0.00203 | 0.00295 | 0.0013  | 0.00265 |
| 2.7E-06 | 0.00101 | 0.00219 | 0.00189 | 0.00142 | 0.00237 |
| 2.8E-06 | 7.6E-06 | 0.00236 | 0.00256 | 0.00114 | 0.00284 |
| 2.8E-06 | 0.00119 | 0.00229 | 0.00178 | 0.00197 | 0.00259 |
| 2.8E-06 | 0.00099 | 0.00251 | 0.00165 | 0.00098 | 0.00236 |
| 2.8E-06 | 0.00245 | 0.00201 | 0.00272 | 1.5E-05 | 0.00284 |
| 2.9E-06 | 0.00059 | 0.00134 | 0.00291 | 0.00088 | 0.00205 |
| 2.9E-06 | 0.00122 | 0.00242 | 0.00207 | 0.00092 | 0.00243 |
| 2.9E-06 | 0.001   | 0.00132 | 0.00292 | 0.00078 | 0.00259 |
| 3E-06   | 0.00052 | 0.00282 | 0.00154 | 0.00039 | 0.00277 |
| 3E-06   | 0.00183 | 0.00235 | 0.00136 | 0.00037 | 0.00213 |
| 3E-06   | 0.00111 | 0.00135 | 0.00238 | 0.00092 | 0.00277 |
| 3.1E-06 | 2.2E-05 | 0.00181 | 0.00123 | 0.00081 | 0.00271 |
| 3.1E-06 | 0.00051 | 0.00227 | 0.00236 | 0.00032 | 0.00304 |
| 3.1E-06 | 0.00047 | 0.00155 | 0.00222 | 0.00035 | 0.00234 |
| 3.2E-06 | 0.00047 | 0.00176 | 0.00177 | 0.00111 | 0.0013  |
| 3.2E-06 | 0.00116 | 0.00134 | 0.00136 | 0.00056 | 0.00331 |
| 3.2E-06 | 0.00026 | 0.00153 | 0.00217 | 0.00178 | 0.00233 |
| 3.3E-06 | 0.00081 | 0.00207 | 0.00311 | 0.001   | 0.00229 |
| 3.3E-06 | 0.00027 | 0.00177 | 0.00148 | 0.00069 | 0.00292 |
| 3.3E-06 | 0.00102 | 0.00065 | 0.00211 | 7E-05   | 0.00198 |
| 3.4E-06 | -0.0002 | 0.00129 | 0.00242 | 5.7E-05 | 0.0024  |
| 3.4E-06 | 0.00013 | 0.0017  | 0.0026  | 0.00105 | 0.00296 |
| 3.4E-06 | -0.0003 | 0.00183 | 0.00239 | 0.00097 | 0.00296 |
| 3.5E-06 | -0.0003 | 0.00128 | 0.00131 | 0.00031 | 0.00205 |
| 3.5E-06 | 3.5E-05 | 0.00173 | 0.00158 | 0.00116 | 0.00156 |
| 3.5E-06 | 0.00065 | 0.00282 | 0.00191 | 0.00065 | 0.00268 |
| 3.6E-06 | 0.00024 | 0.00157 | 0.00163 | 0.00073 | 0.00242 |
| 3.6E-06 | 0.0003  | 0.00153 | 0.00218 | 0.00114 | 0.00144 |
| 3.6E-06 | 0.00018 | 0.00115 | 0.00172 | 0.00059 | 0.0023  |
| 3.6E-06 | -0.0002 | 0.00165 | 0.00191 | 0.00052 | 0.00184 |
| 3.7E-06 | -0.0003 | 0.00109 | 0.00275 | 0.00037 | 0.00278 |
| 3.7E-06 | -0.0002 | 0.00191 | 0.00189 | 0.00094 | 0.00224 |
| 3.7E-06 | -0.0003 | 0.00161 | 0.00254 | 0.0004  | 0.00272 |
| 3.8E-06 | 1E-05   | 0.00147 | 0.0013  | 0.00116 | 0.00189 |
| 3.8E-06 | -0.0004 | 0.00129 | 0.00223 | 0.00057 | 0.0023  |
| 3.8E-06 | 0.00043 | 0.00185 | 0.00225 | 0.00077 | 0.00203 |
| 3.9E-06 | 0.00056 | 0.00125 | 0.00123 | 0.00113 | 0.00197 |
| 3.9E-06 | 0.00114 | 0.00177 | 0.00157 | 0.00147 | 0.00217 |
| 3.9E-06 | 0.00027 | 0.0017  | 0.00208 | 0.00051 | 0.00345 |
| 4E-06   | -2E-06  | 0.00135 | 0.00216 | 0.00087 | 0.00317 |
| 4E-06   | -5E-05  | 0.00087 | 0.0033  | 0.00109 | 0.00258 |



|         |         |         |         |         |         |
|---------|---------|---------|---------|---------|---------|
| 4E-06   | 0.00029 | 0.0017  | 0.00163 | 0.00028 | 0.00208 |
| 4.1E-06 | 2.1E-05 | 0.00065 | 0.00223 | 0.0013  | 0.00209 |
| 4.1E-06 | 0.00113 | 0.00175 | 0.00224 | 0.00099 | 0.00187 |
| 4.1E-06 | 0.00057 | 0.0011  | 0.00147 | 0.00103 | 0.00237 |
| 4.2E-06 | -0.0003 | 0.00033 | 0.00192 | 0.00019 | 0.00258 |
| 4.2E-06 | 5.2E-05 | 0.00133 | 0.00166 | 0.00054 | 0.0024  |
| 4.2E-06 | 3.8E-05 | 0.00103 | 0.00226 | 0.00076 | 0.00241 |
| 4.3E-06 | 0.00071 | 0.00171 | 0.00237 | 0.00081 | 0.00189 |
| 4.3E-06 | 0.00056 | 0.00194 | 0.00133 | 0.00059 | 0.00239 |
| 4.3E-06 | 0.00017 | 0.00118 | 0.00137 | 0.00147 | 0.00206 |
| 4.4E-06 | 0.00012 | 0.00165 | 0.0023  | 0.00072 | 0.00157 |
| 4.4E-06 | -0.0011 | 0.00049 | 0.00239 | 0.00058 | 0.00235 |
| 4.4E-06 | 9.3E-06 | 0.00139 | 0.00134 | 0.00033 | 0.0026  |
| 4.4E-06 | 0.00019 | 0.00078 | 0.0012  | 0.00105 | 0.00218 |
| 4.5E-06 | -0.0003 | 0.00093 | 0.00254 | 0.00115 | 0.00182 |
| 4.5E-06 | -0.0002 | 0.00166 | 0.00222 | 0.00153 | 0.00198 |
| 4.5E-06 | 7.1E-05 | 0.00168 | 0.00236 | 0.00053 | 0.00209 |
| 4.6E-06 | -0.0006 | 0.00092 | 0.0023  | 0.00108 | 0.00129 |
| 4.6E-06 | 0.00024 | 0.00211 | 0.00227 | 0.00038 | 0.0019  |
| 4.6E-06 | -5E-05  | 0.00179 | 0.00173 | 0.00113 | 0.00161 |
| 4.7E-06 | 0.0002  | 0.00151 | 0.0016  | 0.00098 | 0.00132 |
| 4.7E-06 | 4.3E-05 | 0.001   | 0.00196 | 0.00109 | 0.00114 |
| 4.7E-06 | 0.00033 | 0.00128 | 0.00168 | 0.00107 | 0.00202 |
| 4.8E-06 | 0.00027 | 0.00159 | 0.00179 | 0.00114 | 0.00159 |
| 4.8E-06 | 0.00038 | 0.00094 | 0.002   | 0.0007  | 0.00211 |
| 4.8E-06 | 0.00066 | 0.00162 | 0.00206 | 0.00087 | 0.00162 |
| 4.9E-06 | -0.0006 | 0.00191 | 0.00234 | 0.0011  | 0.00238 |
| 4.9E-06 | -0.0003 | 0.00177 | 0.00275 | 0.00014 | 0.00257 |
| 4.9E-06 | -5E-05  | 0.00209 | 0.00241 | 0.00025 | 0.00279 |
| 5E-06   | -0.0009 | 0.0014  | 0.00189 | 0.00098 | 0.00202 |
| 5E-06   | -0.0003 | 0.00113 | 0.00136 | 0.00058 | 0.00223 |
| 5E-06   | 0.00032 | 0.00152 | 0.00156 | 0.00122 | 0.00211 |
| 5.1E-06 | -0.0006 | 0.00076 | 0.00179 | 0.00064 | 0.00252 |
| 5.1E-06 | 0.00039 | 0.00156 | 0.00194 | 0.00082 | 0.00242 |
| 5.1E-06 | -0.0003 | 0.00129 | 0.00117 | 0.00128 | 0.00265 |
| 5.2E-06 | -0.0005 | 0.00128 | 0.00104 | 0.00084 | 0.0017  |
| 5.2E-06 | -0.0011 | 0.00091 | 0.0022  | 0.00064 | 0.0023  |
| 5.2E-06 | 2.1E-05 | 0.00184 | 0.00195 | 0.00063 | 0.00217 |
| 5.2E-06 | 0.00036 | 0.00107 | 0.00139 | 0.00066 | 0.00236 |
| 5.3E-06 | -0.0009 | 0.00221 | 0.00184 | 0.00069 | 0.00202 |
| 5.3E-06 | 6.2E-06 | 0.00166 | 0.00125 | 0.0013  | 0.00153 |
| 5.3E-06 | 0.0006  | 0.0018  | 0.00206 | 0.00085 | 0.00222 |
| 5.4E-06 | -0.0009 | 0.00164 | 0.00214 | 0.00145 | 0.00156 |
| 5.4E-06 | -0.0008 | 0.00111 | 0.00182 | 0.00164 | 0.00147 |
| 5.4E-06 | -0.0003 | 0.00108 | 0.00246 | 0.00109 | 0.00231 |
| 5.5E-06 | -9E-05  | 0.00141 | 0.00207 | 0.00159 | 0.00231 |
| 5.5E-06 | -0.0009 | 0.00017 | 0.00167 | 0.00111 | 0.00242 |
| 5.5E-06 | -0.0003 | 0.00106 | 0.0018  | 0.00109 | 0.00363 |
| 5.6E-06 | 0.00087 | 0.00057 | 0.00273 | 0.00068 | 0.00202 |
| 5.6E-06 | -0.0004 | 0.00122 | 0.0009  | 0.00067 | 0.00155 |
| 5.6E-06 | -0.0007 | 0.00092 | 0.00237 | 0.00074 | 0.00232 |
| 5.7E-06 | -0.0003 | 0.00057 | 0.00095 | 0.00077 | 0.00205 |
| 5.7E-06 | -0.0002 | 0.00115 | 0.00135 | 0.00112 | 0.00249 |
| 5.7E-06 | -0.0005 | 0.0013  | 0.00116 | 0.00106 | 0.002   |

|         |         |         |         |         |         |
|---------|---------|---------|---------|---------|---------|
| 5.8E-06 | -0.0006 | 0.00024 | 0.00194 | 0.00074 | 0.00215 |
| 5.8E-06 | -0.0008 | 0.0008  | 0.00222 | 0.00044 | 0.00196 |
| 5.8E-06 | -0.0002 | 0.00051 | 0.00141 | 0.00113 | 0.00259 |
| 5.9E-06 | 0.00019 | 0.00156 | 0.00169 | 0.0004  | 0.002   |
| 5.9E-06 | 0.00038 | 0.00152 | 0.00247 | 0.00074 | 0.00217 |
| 5.9E-06 | -1E-04  | 0.001   | 0.00207 | 0.00029 | 0.0013  |
| 6E-06   | -0.0003 | 0.00103 | 0.00191 | 0.00052 | 0.00231 |
| 6E-06   | -0.0009 | 0.00048 | 0.00124 | 0.00061 | 0.00206 |
| 6E-06   | -0.0005 | 0.001   | 0.00226 | 0.00055 | 0.00245 |
| 6E-06   | 0.00019 | 0.00066 | 0.0014  | 0.00089 | 0.00214 |
| 6.1E-06 | -0.0006 | 0.00081 | 0.00134 | 0.00041 | 0.00141 |
| 6.1E-06 | -7E-05  | 0.00022 | 0.00186 | 0.00035 | 0.0023  |
| 6.1E-06 | -0.0004 | 0.00191 | 0.00255 | 0.00021 | 0.00164 |
| 6.2E-06 | 0.00065 | 0.00073 | 0.00182 | 0.00115 | 0.00226 |
| 6.2E-06 | 0.00054 | 0.00121 | 0.00182 | 0.0009  | 0.00159 |
| 6.2E-06 | -0.0001 | 0.00062 | 0.00168 | 0.00115 | 0.00263 |
| 6.3E-06 | 0.00016 | 0.00117 | 0.0027  | 0.00093 | 0.00209 |
| 6.3E-06 | 0.00023 | 0.00155 | 0.00223 | 0.00079 | 0.00154 |
| 6.3E-06 | -0.0002 | 0.00125 | 0.00172 | 0.0007  | 0.00237 |
| 6.4E-06 | -0.0003 | 0.00038 | 0.00223 | 0.00127 | 0.00184 |
| 6.4E-06 | -0.0002 | 0.00106 | 0.0017  | 0.00089 | 0.00202 |
| 6.4E-06 | 6.6E-05 | 0.00112 | 0.00206 | 0.0004  | 0.00197 |
| 6.5E-06 | 0.00039 | 0.00094 | 0.00194 | 0.00056 | 0.00199 |
| 6.5E-06 | -0.0003 | 0.00074 | 0.00217 | 0.00109 | 0.00213 |
| 6.5E-06 | 0.00082 | 0.00102 | 0.00137 | 0.00044 | 0.00178 |
| 6.6E-06 | -0.0008 | 0.00081 | 0.00158 | 0.00161 | 0.00179 |
| 6.6E-06 | -0.0007 | 0.00124 | 0.00189 | 0.00047 | 0.00213 |
| 6.6E-06 | -0.0009 | 0.00044 | 0.00192 | 0.00073 | 0.00221 |
| 6.7E-06 | -0.0004 | 0.0012  | 0.00141 | 0.00124 | 0.00198 |
| 6.7E-06 | 0.0004  | 0.00131 | 0.00261 | 0.00091 | 0.00222 |
| 6.7E-06 | -0.0004 | 0.00043 | 0.00232 | 0.00106 | 0.00124 |
| 6.8E-06 | -0.0005 | -8E-05  | 0.00113 | 0.00154 | 0.00235 |
| 6.8E-06 | 0.00042 | 0.00044 | 0.0018  | 0.00039 | 0.00207 |
| 6.8E-06 | -0.0004 | 0.00073 | 0.00244 | 0.00191 | 0.00237 |
| 6.8E-06 | 0.00031 | 0.00011 | 0.00215 | 0.00164 | 0.00195 |
| 6.9E-06 | -4E-05  | 0.00121 | 0.00138 | 1.4E-05 | 0.00173 |
| 6.9E-06 | -3E-05  | 0.00112 | 0.00157 | 0.00092 | 0.00229 |
| 6.9E-06 | -0.0013 | 0.0006  | 0.00172 | 0.00146 | 0.00195 |
| 7E-06   | -0.0007 | 0.0003  | 0.00199 | 0.00099 | 0.00246 |
| 7E-06   | 6.9E-05 | 0.00099 | 0.00106 | 0.001   | 0.00231 |
| 7E-06   | -0.0006 | 0.00101 | 0.0017  | 0.00065 | 0.00203 |
| 7.1E-06 | -0.0003 | 0.00099 | 0.00171 | 0.00082 | 0.00242 |
| 7.1E-06 | -0.0004 | 0.00114 | 0.0013  | 0.00155 | 0.00226 |
| 7.1E-06 | -0.0002 | 0.00085 | 0.00215 | 0.00061 | 0.00223 |
| 7.2E-06 | -0.001  | 0.00156 | 0.00197 | 0.0005  | 0.00242 |
| 7.2E-06 | 0.00019 | 0.00147 | 0.00168 | 0.00065 | 0.00222 |
| 7.2E-06 | -0.0002 | 0.00061 | 0.00168 | 0.00047 | 0.00203 |
| 7.3E-06 | -7E-05  | 0.0012  | 0.00136 | 0.00086 | 0.00174 |
| 7.3E-06 | 8.5E-05 | 0.00068 | 0.00177 | 0.00155 | 0.0019  |
| 7.3E-06 | -0.0004 | 0.00033 | 0.00247 | 0.00085 | 0.00256 |
| 7.4E-06 | -0.0013 | 0.00084 | 0.00244 | 0.00035 | 0.00228 |
| 7.4E-06 | 6.4E-05 | 0.00172 | 0.00182 | 0.00044 | 0.00212 |
| 7.4E-06 | 0.00021 | 0.00106 | 0.00177 | 0.00056 | 0.00219 |
| 7.5E-06 | -0.0004 | 0.00095 | 0.00184 | 0.00082 | 0.00105 |

|         |         |         |         |         |         |
|---------|---------|---------|---------|---------|---------|
| 7.5E-06 | -0.0008 | 0.00145 | 0.00165 | 0.00109 | 0.00196 |
| 7.5E-06 | -0.0003 | 0.00091 | 0.00214 | 0.00081 | 0.00229 |
| 7.6E-06 | -0.0002 | 0.00149 | 0.0018  | 0.00122 | 0.00148 |
| 7.6E-06 | -0.0013 | 0.00124 | 0.00216 | 0.00124 | 0.00133 |
| 7.6E-06 | -0.0003 | 0.00049 | 0.0017  | 0.00063 | 0.0024  |
| 7.6E-06 | 0.00028 | 0.00071 | 0.0012  | 0.00118 | 0.00149 |
| 7.7E-06 | -0.0002 | 0.00125 | 0.00183 | 0.0009  | 0.00206 |
| 7.7E-06 | 0.0006  | 0.00154 | 0.00204 | 0.00087 | 0.00197 |
| 7.7E-06 | -0.0006 | 0.00162 | 0.00207 | 0.00129 | 0.00158 |
| 7.8E-06 | -0.0009 | 0.00186 | 0.00191 | 0.00117 | 0.00219 |
| 7.8E-06 | -3E-05  | 0.0006  | 0.00075 | 0.00136 | 0.00251 |
| 7.8E-06 | -0.0003 | 0.00147 | 0.00148 | 0.00045 | 0.00163 |
| 7.9E-06 | -0.0008 | 0.00073 | 0.0025  | 0.00189 | 0.00191 |
| 7.9E-06 | -0.0006 | 0.00177 | 0.00249 | 0.00064 | 0.00147 |
| 7.9E-06 | -0.0013 | 0.00088 | 0.00234 | 0.00083 | 0.0022  |
| 8E-06   | -0.0003 | 0.00095 | 0.00205 | 0.00163 | 0.00196 |
| 8E-06   | -0.0006 | 0.00093 | 0.00115 | 0.00117 | 0.00186 |
| 8E-06   | -0.001  | 0.0006  | 0.00165 | 0.00044 | 0.0022  |
| 8.1E-06 | -0.0005 | 0.0004  | 0.00205 | 0.00083 | 0.0026  |
| 8.1E-06 | -0.0001 | 0.00038 | 0.00229 | 0.00026 | 0.00209 |
| 8.1E-06 | -0.0021 | 0.00061 | 0.00245 | 0.00024 | 0.00226 |
| 8.2E-06 | -0.0012 | 5.2E-05 | 0.00121 | 0.00046 | 0.00251 |
| 8.2E-06 | -0.001  | 0.0008  | 0.00262 | 0.00127 | 0.00202 |
| 8.2E-06 | -0.0007 | 0.00139 | 0.0018  | 0.0011  | 0.00222 |
| 8.3E-06 | -0.0003 | 0.00056 | 0.00241 | 0.00022 | 0.00222 |
| 8.3E-06 | 0.00043 | 0.00102 | 0.00215 | 0.00032 | 0.00192 |
| 8.3E-06 | 0.00012 | 0.00044 | 0.00215 | 0.00108 | 0.00205 |
| 8.4E-06 | -0.0001 | 0.00081 | 0.00191 | 0.00083 | 0.0015  |
| 8.4E-06 | -0.0008 | 0.00082 | 0.00185 | 0.00089 | 0.00275 |
| 8.4E-06 | -0.0001 | 0.00153 | 0.00157 | 0.00114 | 0.00198 |
| 8.4E-06 | -0.0006 | 0.00128 | 0.00171 | 0.00043 | 0.00148 |
| 8.5E-06 | -0.0008 | 0.00099 | 0.002   | 0.00064 | 0.00227 |
| 8.5E-06 | -0.0007 | 0.0004  | 0.0025  | 0.00057 | 0.00193 |
| 8.5E-06 | -0.0006 | 0.00065 | 0.00199 | 0.0003  | 0.00195 |
| 8.6E-06 | -0.0001 | 0.00151 | 0.00124 | 0.00065 | 0.00235 |
| 8.6E-06 | -0.0004 | 0.00045 | 0.00195 | 0.00101 | 0.00227 |
| 8.6E-06 | -0.0007 | 0.0014  | 0.0014  | 0.00085 | 0.00146 |
| 8.7E-06 | 0.00034 | 0.0018  | 0.00166 | 0.0003  | 0.00226 |
| 8.7E-06 | -0.0009 | 0.0014  | 0.00147 | -0.0002 | 0.00148 |
| 8.7E-06 | -0.001  | 0.00141 | 0.00226 | 0.00082 | 0.00256 |
| 8.8E-06 | -6E-05  | 0.00086 | 0.00195 | 0.00091 | 0.00236 |
| 8.8E-06 | -7E-05  | 0.00125 | 0.00142 | 0.00049 | 0.00208 |
| 8.8E-06 | -0.0004 | 0.00097 | 0.00182 | 0.00053 | 0.00153 |
| 8.9E-06 | 1.2E-05 | 0.00085 | 0.00239 | 0.00034 | 0.00173 |
| 8.9E-06 | -0.0003 | 0.00169 | 0.00186 | 0.00026 | 0.00176 |
| 8.9E-06 | -0.0003 | 0.00062 | 0.00235 | 0.0011  | 0.00266 |
| 9E-06   | -0.0012 | 0.00096 | 0.00238 | 0.00109 | 0.00215 |
| 9E-06   | -0.0007 | 0.00171 | 0.00259 | 0.0017  | 0.00205 |
| 9E-06   | -0.0015 | 0.0014  | 0.00235 | 0.0005  | 0.00215 |
| 9.1E-06 | -0.0008 | 0.00131 | 0.00186 | 0.00117 | 0.00224 |
| 9.1E-06 | -0.0005 | 0.00116 | 0.00225 | 0.00086 | 0.00184 |
| 9.1E-06 | 5.1E-05 | 0.00148 | 0.00166 | 0.00143 | 0.00204 |
| 9.2E-06 | -0.0005 | 0.00134 | 0.001   | 0.00102 | 0.00157 |
| 9.2E-06 | -0.0018 | 0.00107 | 0.00242 | 0.00079 | 0.00177 |

|         |         |         |         |         |         |
|---------|---------|---------|---------|---------|---------|
| 9.2E-06 | -0.0012 | 0.00048 | 0.00181 | 0.00114 | 0.00066 |
| 9.2E-06 | 6.8E-05 | 0.00062 | 0.00195 | 0.00165 | 0.00233 |
| 9.3E-06 | -0.0002 | 0.00086 | 0.00147 | 0.0011  | 0.00225 |
| 9.3E-06 | -0.0005 | 0.00138 | 0.00187 | 0.00065 | 0.00158 |
| 9.3E-06 | -0.0004 | 0.00104 | 0.0027  | 0.00018 | 0.0022  |
| 9.4E-06 | 8.2E-06 | 0.00103 | 0.00226 | 0.00048 | 0.00244 |
| 9.4E-06 | -0.0001 | 0.00086 | 0.00224 | 0.00096 | 0.00171 |
| 9.4E-06 | -0.0012 | 0.00056 | 0.00239 | -6E-05  | 0.00199 |
| 9.5E-06 | 0.00035 | 0.00096 | 0.00162 | 0.00111 | 0.0023  |
| 9.5E-06 | -0.0006 | 0.00105 | 0.00187 | 0.00142 | 0.0024  |
| 9.5E-06 | -0.0002 | 0.00151 | 0.00202 | 0.00071 | 0.00156 |
| 9.6E-06 | -0.0003 | 0.00095 | 0.00217 | 0.00211 | 0.00182 |
| 9.6E-06 | 0.00036 | 0.00138 | 0.00181 | 0.00117 | 0.0019  |
| 9.6E-06 | -9E-05  | 0.00029 | 0.00162 | 0.00013 | 0.00217 |
| 9.7E-06 | 0.00022 | 0.00188 | 0.00169 | 0.00067 | 0.00162 |
| 9.7E-06 | 0.00031 | 0.00186 | 0.0012  | 0.00164 | 0.00226 |
| 9.7E-06 | -0.0012 | 0.00111 | 0.00184 | 0.00082 | 0.00165 |
| 9.8E-06 | -0.0013 | 0.0005  | 0.0018  | 0.00062 | 0.00208 |
| 9.8E-06 | -0.0012 | 0.00153 | 0.0028  | 0.00019 | 0.0021  |
| 9.8E-06 | -0.0002 | 0.00042 | 0.00233 | 0.0006  | 0.00185 |
| 9.9E-06 | -0.0007 | 0.00043 | 0.00208 | 0.00118 | 0.00232 |
| 9.9E-06 | 0.00022 | 0.00098 | 0.00231 | 0.0005  | 0.00227 |
| 9.9E-06 | -0.0006 | 0.00015 | 0.00173 | 0.00084 | 0.0015  |
| 1E-05   | -0.001  | 0.00163 | 0.00146 | 0.00024 | 0.00161 |
| 1E-05   | -0.0014 | 0.00067 | 0.00175 | 0.00081 | 0.00092 |
| 1E-05   | -0.0011 | 0.00079 | 0.00196 | 4.5E-05 | 0.00256 |
| 1E-05   | -0.0011 | 0.00107 | 0.00252 | 0.00022 | 0.00246 |
| 1E-05   | -0.0001 | 0.00125 | 0.00234 | 0.00166 | 0.00209 |
| 1E-05   | -0.0001 | 0.00015 | 0.00206 | 0.0017  | 0.00176 |
| 1E-05   | -0.0004 | 0.00094 | 0.00102 | 0.00026 | 0.00216 |
| 1E-05   | -0.0006 | 0.0011  | 0.00155 | 0.00059 | 0.00181 |
| 1E-05   | -0.0003 | 0.00068 | 0.00221 | 0.0003  | 0.00189 |
| 1E-05   | 0.00029 | 0.00112 | 0.00229 | 0.00108 | 0.00157 |
| 1E-05   | -0.0008 | 0.00053 | 0.00158 | 0.00084 | 0.00178 |
| 1E-05   | -0.0005 | 0.00049 | 0.00238 | 0.00108 | 0.00211 |
| 1E-05   | -0.0002 | 0.0009  | 0.00274 | 0.00133 | 0.0023  |
| 1E-05   | -0.0006 | 0.00079 | 0.0012  | 0.001   | 0.00169 |
| 1E-05   | -0.0011 | 0.0003  | 0.00178 | 0.00046 | 0.00226 |
| 1E-05   | -0.0002 | 0.00095 | 0.00211 | 0.00126 | 0.00171 |
| 1E-05   | -6E-05  | 0.00045 | 0.00178 | 0.00119 | 0.00186 |
| 1.1E-05 | -0.0007 | -6E-05  | 0.00197 | 0.00065 | 0.00156 |
| 1.1E-05 | -2E-05  | 0.00086 | 0.00175 | 0.0005  | 0.00156 |
| 1.1E-05 | 8.6E-06 | 0.00047 | 0.00209 | 0.00041 | 0.00197 |
| 1.1E-05 | -0.0002 | 0.00125 | 0.00211 | 0.00025 | 0.00214 |
| 1.1E-05 | -0.0006 | 0.00058 | 0.00166 | 0.00056 | 0.00208 |
| 1.1E-05 | -0.0007 | 0.00158 | 0.00159 | 0.00085 | 0.00191 |
| 1.1E-05 | -0.0012 | 0.00041 | 0.00182 | 0.00089 | 0.00234 |
| 1.1E-05 | 0.00021 | 0.00116 | 0.0023  | 0.00085 | 0.0024  |
| 1.1E-05 | 0.00023 | 0.0008  | 0.00245 | 0.00109 | 0.00164 |
| 1.1E-05 | 2.6E-05 | 0.00094 | 0.00112 | 0.00079 | 0.00215 |
| 1.1E-05 | -0.0012 | 0.00084 | 0.00176 | 0.00107 | 0.00181 |
| 1.1E-05 | -0.0006 | 0.00076 | 0.002   | 0.0011  | 0.00169 |
| 1.1E-05 | -0.0009 | 0.00124 | 0.00211 | 0.00085 | 0.00235 |
| 1.1E-05 | -0.0002 | 0.00037 | 0.00183 | 0.00171 | 0.00226 |

|         |         |         |         |         |         |
|---------|---------|---------|---------|---------|---------|
| 1.1E-05 | -0.0007 | 0.0006  | 0.00234 | 0.0005  | 0.00227 |
| 1.1E-05 | -0.0003 | 0.00171 | 0.00174 | 0.00136 | 0.00177 |
| 1.1E-05 | 6.2E-05 | 0.00102 | 0.00042 | 0.00034 | 0.00137 |
| 1.1E-05 | -6E-05  | 0.00093 | 0.00222 | 0.00047 | 0.00256 |
| 1.1E-05 | -0.0012 | 0.0003  | 0.00164 | 0.00083 | 0.00329 |
| 1.1E-05 | -0.0004 | 0.00121 | 0.00161 | 0.00125 | 0.00137 |
| 1.1E-05 | -4E-05  | 0.0002  | 0.00179 | 0.00099 | 0.00268 |
| 1.1E-05 | -0.0003 | -0.0005 | 0.00131 | 0.00107 | 0.00163 |
| 1.1E-05 | -0.0013 | 0.00136 | 0.00142 | 0.00071 | 0.00186 |
| 1.1E-05 | -0.001  | 0.00077 | 0.00145 | 0.0004  | 0.00153 |
| 1.1E-05 | -9E-05  | 0.00043 | 0.00131 | 0.00146 | 0.00214 |
| 1.1E-05 | -0.0006 | 0.0011  | 0.00186 | 0.00032 | 0.00217 |
| 1.1E-05 | -0.0003 | 0.00098 | 0.00099 | 0.00086 | 0.00217 |
| 1.1E-05 | -0.001  | 0.00102 | 0.00132 | 0.00072 | 0.00191 |
| 1.1E-05 | -0.0008 | 0.00076 | 0.00192 | 0.00164 | 0.00223 |
| 1.1E-05 | -0.0005 | 0.00034 | 0.00243 | 0.0015  | 0.00188 |
| 1.1E-05 | 8.7E-05 | 0.00035 | 0.00183 | 0.00105 | 0.00176 |
| 1.1E-05 | -0.0005 | 0.00029 | 0.00245 | 0.0015  | 0.00249 |
| 1.2E-05 | -0.0005 | 0.00092 | 0.002   | 0.00076 | 0.00231 |
| 1.2E-05 | -0.0012 | 0.00104 | 0.00252 | 0.00127 | 0.00175 |
| 1.2E-05 | -0.0012 | 0.00066 | 0.00264 | 0.00078 | 0.00185 |
| 1.2E-05 | -0.0007 | 0.00152 | 0.00165 | 0.00078 | 0.00263 |
| 1.2E-05 | -0.0015 | 0.00074 | 0.00205 | 0.00106 | 0.00168 |
| 1.2E-05 | -0.0003 | 0.00079 | 0.0012  | 8.3E-05 | 0.0018  |
| 1.2E-05 | -0.001  | 0.00153 | 0.00159 | 0.00087 | 0.00194 |
| 1.2E-05 | 0.00024 | 0.00108 | 0.00112 | 0.00135 | 0.00171 |
| 1.2E-05 | -0.0006 | 0.00121 | 0.00199 | 0.00053 | 0.00146 |
| 1.2E-05 | -0.0005 | 0.00127 | 0.00191 | 0.00082 | 0.00087 |
| 1.2E-05 | -1E-05  | 0.00057 | 0.0019  | 0.00101 | 0.00297 |
| 1.2E-05 | -0.0007 | 0.00052 | 0.00119 | 0.00166 | 0.00188 |
| 1.2E-05 | -0.0002 | 0.00071 | 0.00136 | 0.00047 | 0.0022  |
| 1.2E-05 | -0.0012 | 0.00116 | 0.00113 | 0.00149 | 0.0018  |
| 1.2E-05 | -0.0004 | 0.00125 | 0.00193 | 0.00149 | 0.00218 |
| 1.2E-05 | -0.0009 | 0.00039 | 0.00169 | 0.00019 | 0.00187 |
| 1.2E-05 | -0.0004 | 0.00092 | 0.00149 | 0.0008  | 0.00253 |
| 1.2E-05 | -0.001  | 0.00122 | 0.00119 | 0.0005  | 0.00152 |
| 1.2E-05 | -0.0002 | 0.00037 | 0.00204 | 0.00051 | 0.00176 |
| 1.2E-05 | -0.0005 | 0.00056 | 0.00196 | 0.00064 | 0.00219 |
| 1.2E-05 | -0.0007 | 0.00016 | 0.00173 | 0.00043 | 0.00128 |
| 1.2E-05 | -0.0008 | 0.00096 | 0.00298 | 0.00018 | 0.00305 |
| 1.2E-05 | -0.0009 | 0.0006  | 0.0019  | 0.00082 | 0.00221 |
| 1.2E-05 | -0.0002 | 0.00093 | 0.0025  | 0.00068 | 0.00191 |
| 1.2E-05 | -0.0008 | 0.00042 | 0.00151 | 0.00064 | 0.00191 |
| 1.2E-05 | -0.0012 | 0.0009  | 0.00182 | 0.00073 | 0.00208 |
| 1.2E-05 | -0.0006 | 0.00092 | 0.00165 | 0.0012  | 0.00287 |
| 1.2E-05 | -0.0009 | 0.00064 | 0.00214 | 0.00115 | 0.00214 |
| 1.2E-05 | -0.0018 | 0.00023 | 0.00241 | 0.00092 | 0.00239 |
| 1.2E-05 | -0.0009 | 0.00068 | 0.00273 | 0.00126 | 0.00222 |
| 1.2E-05 | -0.0009 | 5.3E-05 | 0.00199 | 0.00112 | 0.00178 |
| 1.3E-05 | -0.0007 | 0.0007  | 0.00162 | 0.00062 | 0.00191 |
| 1.3E-05 | 0.00014 | 0.00121 | 0.00156 | 0.00023 | 0.00214 |
| 1.3E-05 | -8E-05  | 0.00125 | 0.0024  | 0.00075 | 0.00161 |
| 1.3E-05 | -0.0003 | 0.00117 | 0.00069 | 0.00067 | 0.00149 |
| 1.3E-05 | -0.0007 | 0.00062 | 0.00131 | 0.00109 | 0.00174 |

|         |         |         |         |         |         |
|---------|---------|---------|---------|---------|---------|
| 1.3E-05 | -0.0007 | 0.00032 | 0.00201 | 0.00089 | 0.00227 |
| 1.3E-05 | -0.0002 | 0.00099 | 0.00249 | 0.00044 | 0.00205 |
| 1.3E-05 | -0.001  | 0.00092 | 0.00185 | 0.00067 | 0.00144 |
| 1.3E-05 | -0.0009 | 0.00072 | 0.00193 | 0.00111 | 0.0016  |
| 1.3E-05 | -0.0014 | 0.00012 | 0.00238 | 9.8E-05 | 0.00208 |
| 1.3E-05 | -0.0008 | 0.00036 | 0.0023  | 0.00088 | 0.00207 |
| 1.3E-05 | -0.0007 | 8E-05   | 0.00153 | 0.00087 | 0.00239 |
| 1.3E-05 | -0.0012 | 0.00037 | 0.00108 | 0.00068 | 0.00233 |
| 1.3E-05 | -0.0011 | 0.00014 | 0.00182 | 0.00131 | 0.00225 |
| 1.3E-05 | -0.0006 | 0.00131 | 0.00204 | -3E-05  | 0.00195 |
| 1.3E-05 | -0.0003 | 0.00038 | 0.00207 | 0.0002  | 0.0014  |
| 1.3E-05 | -0.0007 | 9.8E-05 | 0.0021  | 0.00077 | 0.00274 |
| 1.3E-05 | -0.0005 | -0.0001 | 0.00122 | 0.00109 | 0.00197 |
| 1.3E-05 | 0.00049 | 0.00145 | 0.00212 | 0.00059 | 0.00221 |
| 1.3E-05 | -0.0008 | 0.00161 | 0.00255 | 0.00084 | 0.00149 |
| 1.3E-05 | -0.0012 | 0.00033 | 0.00231 | 0.00027 | 0.00237 |
| 1.3E-05 | -0.0012 | 0.00048 | 0.00179 | 0.00094 | 0.00187 |
| 1.3E-05 | -0.0005 | -0.0003 | 0.00249 | 0.00118 | 0.0021  |
| 1.3E-05 | -0.0005 | 0.00073 | 0.00182 | 0.00091 | 0.00239 |
| 1.3E-05 | -0.0002 | 0.0005  | 0.00112 | 0.00107 | 0.00246 |
| 1.3E-05 | -2E-05  | 0.00054 | 0.00225 | 0.00058 | 0.00193 |
| 1.3E-05 | -0.0007 | 0.0007  | 0.00156 | 0.00062 | 0.00135 |
| 1.3E-05 | -0.0005 | 0.00026 | 0.00184 | 0.00129 | 0.00178 |
| 1.3E-05 | 0.00018 | 0.00021 | 0.00227 | 0.00019 | 0.0017  |
| 1.3E-05 | -0.0004 | 0.00063 | 0.00274 | 0.00054 | 0.00197 |
| 1.3E-05 | -0.0001 | 0.00025 | 0.00228 | 0.00094 | 0.0008  |
| 1.4E-05 | -0.0002 | 0.00037 | 0.00209 | 0.00109 | 0.00188 |
| 1.4E-05 | 3.4E-05 | 0.00097 | 0.002   | 0.00041 | 0.00187 |
| 1.4E-05 | -0.0007 | 0.00146 | 0.00181 | 0.00065 | 0.00155 |
| 1.4E-05 | -0.0008 | 0.0015  | 0.0022  | 0.00052 | 0.00246 |
| 1.4E-05 | -0.0004 | 0.00095 | 0.00236 | 0.00172 | 0.00074 |
| 1.4E-05 | -0.0007 | 0.00096 | 0.00178 | 0.00065 | 0.00177 |
| 1.4E-05 | -0.0007 | 0.00076 | 0.00251 | 0.00109 | 0.00237 |
| 1.4E-05 | -0.0003 | 0.00069 | 0.00216 | 0.00047 | 0.00137 |
| 1.4E-05 | -0.0019 | 0.00013 | 0.00189 | 0.00127 | 0.00294 |
| 1.4E-05 | 0.00013 | 0.00049 | 0.00197 | 0.00074 | 0.00184 |
| 1.4E-05 | 0.00019 | 0.00116 | 0.00213 | 0.00135 | 0.00157 |
| 1.4E-05 | -0.0008 | 0.00067 | 0.00154 | 0.00082 | 0.00189 |
| 1.4E-05 | -0.0011 | 0.00055 | 0.00215 | 0.00016 | 0.00167 |
| 1.4E-05 | -0.0002 | 0.00062 | 0.00192 | 0.00029 | 0.00168 |
| 1.4E-05 | -0.0002 | 0.00088 | 0.0017  | 0.00084 | 0.00215 |
| 1.4E-05 | 0.00025 | 0.00092 | 0.00146 | 0.00093 | 0.0018  |
| 1.4E-05 | 0.00017 | 0.00101 | 0.00136 | 0.00072 | 0.00168 |
| 1.4E-05 | -0.0004 | 0.00065 | 0.00223 | 0.00105 | 0.00225 |
| 1.4E-05 | -0.0005 | 0.00145 | 0.00221 | 0.0013  | 0.00185 |
| 1.4E-05 | -0.0009 | -0.0002 | 0.00208 | 0.00077 | 0.00159 |
| 1.4E-05 | -4E-05  | 0.00078 | 0.00287 | 0.00118 | 0.0012  |
| 1.4E-05 | -0.0005 | 0.00117 | 0.00174 | 0.00055 | 0.00156 |
| 1.4E-05 | 0.00013 | 0.00071 | 0.00288 | 0.00105 | 0.00174 |
| 1.4E-05 | -0.0005 | 0.00014 | 0.00173 | 0.0006  | 0.00163 |
| 1.4E-05 | -0.0001 | 0.00088 | 0.00184 | 0.00091 | 0.0025  |
| 1.4E-05 | -0.0008 | -0.0002 | 0.00203 | 0.00062 | 0.00199 |
| 1.4E-05 | -0.0003 | 0.0004  | 0.00233 | 0.00114 | 0.00221 |
| 1.4E-05 | -0.0009 | 0.00013 | 0.00131 | 0.00129 | 0.00253 |

|         |         |         |         |         |         |
|---------|---------|---------|---------|---------|---------|
| 1.4E-05 | -0.001  | 0.00076 | 0.00219 | 0.00106 | 0.00242 |
| 1.4E-05 | 0.0004  | 0.00052 | 0.00206 | 0.00032 | 0.00261 |
| 1.4E-05 | 0.00036 | 0.001   | 0.00276 | 0.00094 | 0.00222 |
| 1.5E-05 | -0.0008 | 0.00046 | 0.00246 | 0.00061 | 0.0021  |
| 1.5E-05 | -0.0004 | 0.0007  | 0.00195 | 0.00064 | 0.00189 |
| 1.5E-05 | -5E-05  | 0.00066 | 0.00195 | 0.00066 | 0.00196 |
| 1.5E-05 | -0.0003 | 0.00104 | 0.0014  | 0.00069 | 0.00165 |
| 1.5E-05 | -0.0014 | 0.00074 | 0.00203 | 0.0004  | 0.00127 |
| 1.5E-05 | -0.0008 | 0.00146 | 0.00181 | 0.00109 | 0.00209 |
| 1.5E-05 | 8.9E-05 | 0.00094 | 0.00168 | 0.00127 | 0.00246 |
| 1.5E-05 | -0.0007 | 0.00057 | 0.00098 | 0.00116 | 0.00239 |
| 1.5E-05 | -0.0009 | 0.00025 | 0.00135 | 0.00116 | 0.00234 |
| 1.5E-05 | -0.0016 | 0.0007  | 0.00278 | 0.00196 | 0.00293 |
| 1.5E-05 | -0.001  | 0.00141 | 0.00223 | 0.00131 | 0.002   |
| 1.5E-05 | 0.0006  | 0.0007  | 0.00181 | 0.00126 | 0.00195 |
| 1.5E-05 | 0.00016 | 0.00059 | 0.00179 | 0.00113 | 0.00192 |
| 1.5E-05 | -0.0009 | 0.00062 | 0.00143 | 0.00043 | 0.002   |
| 1.5E-05 | 0.00038 | 0.00013 | 0.00148 | 0.00125 | 0.00227 |
| 1.5E-05 | -0.0005 | 0.00092 | 0.00179 | 0.00053 | 0.00189 |

**Table SI.10:** Primary kinetic data for the reaction of  $\epsilon$ -caprolactam (S10) with CumO $\bullet$  generated by 355 nm LFP in MeCN (**Figure SI.10**).

| t / s   | $\Delta\Delta$ $\epsilon$ -caprolactam (S10) |         |         |         |         |
|---------|----------------------------------------------|---------|---------|---------|---------|
|         | 0.1M                                         | 0.303M  | 0.5M    | 0.74M   | 1.0M    |
| -1E-06  | -0.0002                                      | 1.3E-05 | -0.0006 | -0.0002 | 0.00026 |
| -1E-06  | -0.0006                                      | 0.00018 | -1E-05  | -8E-05  | 1.4E-05 |
| -9E-07  | -0.0013                                      | 0.00016 | -0.0008 | 0.0013  | -0.0001 |
| -9E-07  | -0.0007                                      | 0.00052 | -0.0006 | 0.00028 | 0.00011 |
| -9E-07  | -0.0012                                      | 0.00029 | -4E-05  | 0.00039 | -0.0001 |
| -8E-07  | -0.0004                                      | 0.0008  | -0.0004 | -0.0002 | 0.00015 |
| -8E-07  | -0.0006                                      | 0.00027 | -0.0002 | 0.00063 | 0.00029 |
| -8E-07  | -0.0006                                      | 0.0009  | -0.0006 | 7.4E-05 | -0.0002 |
| -7E-07  | -0.0004                                      | 0.00029 | -0.0004 | 0.00063 | 0.00059 |
| -7E-07  | -0.0012                                      | 0.00031 | -0.0011 | 8.1E-05 | -3E-05  |
| -7E-07  | -0.0009                                      | 0.00027 | -4E-05  | 0.00051 | 0.00059 |
| -6E-07  | -0.0007                                      | 0.0005  | -0.0001 | 0.00015 | 0.00051 |
| -6E-07  | -0.0007                                      | 0.00012 | -0.0009 | 0.0007  | -2E-05  |
| -6E-07  | -0.0011                                      | 0.00075 | -0.0002 | 0.00027 | 0.00016 |
| -5E-07  | -0.0009                                      | 0.00039 | -0.0004 | 0.00029 | -0.0002 |
| -5E-07  | -0.0005                                      | 0.00043 | -0.0006 | 0.00085 | -0.0009 |
| -5E-07  | -0.0009                                      | 0.00036 | -0.0007 | -0.0004 | -7E-05  |
| -4E-07  | -0.0011                                      | 0.00041 | -0.0002 | 0.00016 | 0.00041 |
| -4E-07  | -0.0009                                      | 0.00056 | -2E-06  | 0.00044 | 0.00014 |
| -4E-07  | -0.0002                                      | 0.00042 | -0.0007 | 0.00015 | -0.0002 |
| -4E-07  | -0.0005                                      | 0.00043 | -0.0004 | 0.00061 | 0.00029 |
| -3E-07  | -0.0012                                      | -0.0001 | 1.6E-05 | 0.00075 | 0.00042 |
| -3E-07  | -0.0009                                      | -0.0003 | -9E-05  | 0.00064 | 0.00043 |
| -3E-07  | -0.0009                                      | 0.00037 | -0.0006 | 0.00021 | 0.00033 |
| -2E-07  | -0.0006                                      | 0.00041 | -0.0005 | -8E-05  | 0.00068 |
| -2E-07  | -0.0015                                      | 0.00047 | 0.00021 | 0.00014 | 0.00034 |
| -2E-07  | -0.0018                                      | 0.0002  | -0.0005 | 0.00051 | 0.00108 |
| -1E-07  | -0.0011                                      | 0.00041 | -0.0012 | 0.00063 | -0.0015 |
| -1E-07  | -0.0017                                      | 0.00042 | -0.001  | 0.00012 | 0.00036 |
| -6E-08  | -0.0006                                      | 0.00028 | -0.0007 | 1.9E-05 | -0.0002 |
| -3E-08  | -0.0008                                      | 0.00071 | -0.0009 | -0.0003 | 0.00012 |
| -4E-10  | -0.0042                                      | -0.0037 | -0.0036 | -0.0022 | -0.0031 |
| 3.2E-08 | -0.0064                                      | -0.0082 | -0.0087 | -0.0079 | -0.0103 |
| 6.4E-08 | 0.01455                                      | 0.01639 | 0.01337 | 0.01329 | 0.01365 |
| 9.6E-08 | 0.01584                                      | 0.01684 | 0.01469 | 0.01441 | 0.01445 |
| 1.3E-07 | 0.01476                                      | 0.01654 | 0.01403 | 0.01389 | 0.0135  |
| 1.6E-07 | 0.01461                                      | 0.01618 | 0.01416 | 0.01392 | 0.01235 |
| 1.9E-07 | 0.01416                                      | 0.01458 | 0.01349 | 0.01272 | 0.0119  |
| 2.2E-07 | 0.01431                                      | 0.01507 | 0.0126  | 0.01239 | 0.01177 |
| 2.6E-07 | 0.01368                                      | 0.01373 | 0.01265 | 0.0114  | 0.01095 |
| 2.9E-07 | 0.0134                                       | 0.01351 | 0.01217 | 0.01172 | 0.01069 |
| 3.2E-07 | 0.01351                                      | 0.01369 | 0.01197 | 0.01037 | 0.01006 |
| 3.5E-07 | 0.01266                                      | 0.01382 | 0.01113 | 0.0105  | 0.00994 |
| 3.8E-07 | 0.0116                                       | 0.01204 | 0.01081 | 0.01018 | 0.00907 |
| 4.2E-07 | 0.01193                                      | 0.01246 | 0.01213 | 0.01038 | 0.00854 |
| 4.5E-07 | 0.01142                                      | 0.01235 | 0.00975 | 0.00955 | 0.00792 |
| 4.8E-07 | 0.01046                                      | 0.01122 | 0.01062 | 0.00834 | 0.00815 |
| 5.1E-07 | 0.01115                                      | 0.01142 | 0.01021 | 0.00838 | 0.0083  |
| 5.4E-07 | 0.01024                                      | 0.01041 | 0.00944 | 0.00814 | 0.00668 |



|         |         |         |         |         |         |
|---------|---------|---------|---------|---------|---------|
| 5.8E-07 | 0.01064 | 0.01125 | 0.00888 | 0.00817 | 0.00692 |
| 6.1E-07 | 0.00987 | 0.01075 | 0.00792 | 0.00737 | 0.00743 |
| 6.4E-07 | 0.01026 | 0.00997 | 0.00799 | 0.00715 | 0.00595 |
| 6.7E-07 | 0.0097  | 0.0102  | 0.00783 | 0.00693 | 0.00642 |
| 7E-07   | 0.00904 | 0.00977 | 0.00712 | 0.0069  | 0.00547 |
| 7.4E-07 | 0.00843 | 0.00926 | 0.00682 | 0.00694 | 0.00582 |
| 7.7E-07 | 0.00862 | 0.00867 | 0.00622 | 0.00703 | 0.00549 |
| 8E-07   | 0.00883 | 0.00882 | 0.00677 | 0.00604 | 0.00524 |
| 8.3E-07 | 0.00812 | 0.00801 | 0.00656 | 0.00532 | 0.00478 |
| 8.6E-07 | 0.00881 | 0.00779 | 0.00625 | 0.00536 | 0.00447 |
| 9E-07   | 0.00695 | 0.00799 | 0.00561 | 0.00523 | 0.00506 |
| 9.3E-07 | 0.00712 | 0.00774 | 0.00578 | 0.0046  | 0.00487 |
| 9.6E-07 | 0.00738 | 0.00793 | 0.00592 | 0.00475 | 0.00306 |
| 9.9E-07 | 0.00748 | 0.00691 | 0.00517 | 0.00451 | 0.00322 |
| 1E-06   | 0.00714 | 0.00743 | 0.00539 | 0.0043  | 0.00359 |
| 1.1E-06 | 0.00722 | 0.00691 | 0.00422 | 0.00468 | 0.00384 |
| 1.1E-06 | 0.00614 | 0.00674 | 0.00442 | 0.00429 | 0.00278 |
| 1.1E-06 | 0.00693 | 0.00699 | 0.00398 | 0.00412 | 0.00346 |
| 1.2E-06 | 0.00566 | 0.00608 | 0.00448 | 0.00406 | 0.00365 |
| 1.2E-06 | 0.00566 | 0.00602 | 0.00406 | 0.00342 | 0.00311 |
| 1.2E-06 | 0.00575 | 0.00679 | 0.00355 | 0.00319 | 0.00292 |
| 1.2E-06 | 0.00523 | 0.00574 | 0.00409 | 0.0034  | 0.00275 |
| 1.3E-06 | 0.00562 | 0.00567 | 0.0037  | 0.00352 | 0.00252 |
| 1.3E-06 | 0.00437 | 0.00579 | 0.00368 | 0.00292 | 0.00187 |
| 1.3E-06 | 0.005   | 0.0056  | 0.00309 | 0.00342 | 0.00258 |
| 1.4E-06 | 0.00539 | 0.0056  | 0.00331 | 0.00338 | 0.00223 |
| 1.4E-06 | 0.00425 | 0.00579 | 0.00324 | 0.00309 | 0.00169 |
| 1.4E-06 | 0.00419 | 0.00538 | 0.00306 | 0.00266 | 0.00299 |
| 1.5E-06 | 0.00472 | 0.00511 | 0.0031  | 0.00292 | 0.00234 |
| 1.5E-06 | 0.00408 | 0.00529 | 0.0031  | 0.00322 | 0.0022  |
| 1.5E-06 | 0.00404 | 0.005   | 0.00273 | 0.00257 | 0.00161 |
| 1.6E-06 | 0.00405 | 0.00449 | 0.00208 | 0.0021  | 0.00143 |
| 1.6E-06 | 0.00401 | 0.00451 | 0.00209 | 0.00239 | 0.00267 |
| 1.6E-06 | 0.00419 | 0.00462 | 0.00207 | 0.00212 | 0.00092 |
| 1.7E-06 | 0.00312 | 0.00405 | 0.00205 | 0.00257 | 0.0016  |
| 1.7E-06 | 0.00395 | 0.00432 | 0.00209 | 0.00223 | 0.00178 |
| 1.7E-06 | 0.00324 | 0.00418 | 0.00326 | 0.00238 | 0.00196 |
| 1.8E-06 | 0.00346 | 0.00373 | 0.00154 | 0.00208 | 0.00171 |
| 1.8E-06 | 0.00368 | 0.00363 | 0.00204 | 0.00185 | 0.00068 |
| 1.8E-06 | 0.00335 | 0.00429 | 0.00128 | 0.00189 | 0.00154 |
| 1.9E-06 | 0.00314 | 0.0034  | 0.00214 | 0.00182 | 0.00156 |
| 1.9E-06 | 0.00238 | 0.00386 | 0.0012  | 0.00184 | 0.00134 |
| 1.9E-06 | 0.00319 | 0.00379 | 0.00171 | 0.00144 | 0.00198 |
| 2E-06   | 0.00264 | 0.00267 | 0.0018  | 0.00258 | 0.00191 |
| 2E-06   | 0.00238 | 0.00335 | 0.0006  | 0.00204 | 0.00093 |
| 2E-06   | 0.0028  | 0.00306 | 0.00044 | 0.00267 | 0.00149 |
| 2E-06   | 0.0024  | 0.00298 | 0.00085 | 0.00157 | 0.00113 |
| 2.1E-06 | 0.00253 | 0.00303 | 0.00113 | 0.00157 | 0.0011  |
| 2.1E-06 | 0.00227 | 0.00299 | 0.0015  | 0.00101 | 0.00039 |
| 2.1E-06 | 0.00177 | 0.00334 | 0.00086 | 0.00183 | 0.00102 |
| 2.2E-06 | 0.00215 | 0.00347 | 0.00122 | 0.00178 | 0.00101 |
| 2.2E-06 | 0.00175 | 0.00315 | 0.00138 | 0.00096 | 0.00169 |
| 2.2E-06 | 0.00212 | 0.00279 | 0.00129 | 0.00085 | 0.00175 |
| 2.3E-06 | 0.00257 | 0.0025  | 0.00096 | 0.00126 | 0.00158 |

|         |         |         |         |         |         |
|---------|---------|---------|---------|---------|---------|
| 2.3E-06 | 0.0018  | 0.00275 | 0.00058 | 0.00164 | 0.00037 |
| 2.3E-06 | 0.00158 | 0.00247 | 0.00154 | 0.00145 | 0.00101 |
| 2.4E-06 | 0.00194 | 0.00261 | 0.00106 | 0.00127 | 0.00132 |
| 2.4E-06 | 0.00156 | 0.0027  | 0.00078 | 0.00137 | 0.00105 |
| 2.4E-06 | 0.00186 | 0.0032  | 0.0011  | 0.00142 | 0.00097 |
| 2.5E-06 | 0.00114 | 0.00266 | 0.00068 | 0.00133 | 0.00058 |
| 2.5E-06 | 0.00186 | 0.00273 | 0.00123 | 0.00168 | 0.00044 |
| 2.5E-06 | 0.00092 | 0.00233 | 0.00045 | 0.00073 | 0.00091 |
| 2.6E-06 | 0.00126 | 0.00184 | 0.00114 | 0.00135 | 0.00069 |
| 2.6E-06 | 0.00097 | 0.00248 | 0.00043 | 0.00124 | 0.00166 |
| 2.6E-06 | 0.00069 | 0.00204 | 0.00047 | 0.00062 | 0.00104 |
| 2.7E-06 | 0.00145 | 0.0022  | 0.00059 | 0.00072 | 0.0007  |
| 2.7E-06 | 0.00085 | 0.00236 | 0.00022 | 0.00123 | 0.00023 |
| 2.7E-06 | 0.00167 | 0.00198 | 0.00045 | 0.00083 | 0.00031 |
| 2.8E-06 | 0.00105 | 0.0021  | 0.00051 | 0.00085 | 0.00057 |
| 2.8E-06 | 0.00108 | 0.00193 | 0.00056 | 0.00096 | 0.00124 |
| 2.8E-06 | 0.00082 | 0.00213 | 0.00046 | 0.00078 | 0.00087 |
| 2.8E-06 | 0.0007  | 0.00203 | 0.00016 | 0.00077 | 0.00093 |
| 2.9E-06 | 0.00024 | 0.0025  | -1E-05  | 0.00054 | 0.00036 |
| 2.9E-06 | 0.001   | 0.00219 | -0.0003 | 0.00119 | 0.00011 |
| 2.9E-06 | 0.00077 | 0.00184 | -0.0005 | 0.00089 | 0.00072 |
| 3E-06   | 0.00099 | 0.0019  | 0.00026 | 0.00148 | 0.00056 |
| 3E-06   | 0.00037 | 0.00205 | -3E-05  | 0.00077 | 0.00079 |
| 3E-06   | 0.00032 | 0.00227 | 0.00028 | 0.00073 | 0.00089 |
| 3.1E-06 | -0.0003 | 0.00101 | 0.00046 | 0.00099 | 0.00116 |
| 3.1E-06 | 0.00042 | 0.00207 | 6.4E-05 | 0.00133 | 0.00046 |
| 3.1E-06 | 0.00046 | 0.00193 | 0.00038 | 0.00107 | 0.00104 |
| 3.2E-06 | 0.00049 | 0.00153 | 0.00129 | 0.00078 | 0.00041 |
| 3.2E-06 | 0.0005  | 0.00162 | -0.0005 | 0.00092 | 0.00056 |
| 3.2E-06 | 0.00048 | 0.00187 | -0.0007 | 0.0006  | 0.00088 |
| 3.3E-06 | 0.00043 | 0.00234 | 0.00013 | 0.00111 | -0.0005 |
| 3.3E-06 | 0.0005  | 0.00163 | -9E-05  | 0.00064 | -3E-05  |
| 3.3E-06 | 0.00046 | 0.00148 | 0.00017 | 0.00093 | -0.0001 |
| 3.4E-06 | 0.00023 | 0.00106 | -6E-05  | 0.00083 | 0.00026 |
| 3.4E-06 | 0.00066 | 0.00146 | -0.0007 | 0.00129 | 0.00045 |
| 3.4E-06 | 4.2E-05 | 0.00134 | -0.0004 | 0.00073 | -0.0002 |
| 3.5E-06 | 3.5E-05 | 0.00224 | -0.0004 | 0.00108 | 0.00111 |
| 3.5E-06 | 0.00025 | 0.00187 | 0.00012 | 0.00108 | 0.00082 |
| 3.5E-06 | 0.00027 | 0.00131 | -2E-05  | 0.00091 | 0.00024 |
| 3.6E-06 | 0.00022 | 0.0015  | -5E-06  | 0.00058 | 0.00072 |
| 3.6E-06 | -0.0002 | 0.00172 | 0.0001  | 0.00053 | 0.00133 |
| 3.6E-06 | -0.0006 | 0.00194 | 1E-05   | 0.00019 | 0.00082 |
| 3.6E-06 | -0.0003 | 0.00107 | 0.00017 | 0.00063 | 0.0007  |
| 3.7E-06 | -4E-05  | 0.00102 | -0.0002 | 0.00094 | 0.00052 |
| 3.7E-06 | -0.0006 | 0.00108 | -0.0001 | 0.00061 | 0.00075 |
| 3.7E-06 | 0.00022 | 0.00077 | 0.00013 | 0.00085 | 0.0001  |
| 3.8E-06 | -0.0006 | 0.00147 | -0.0001 | -0.0002 | 0.00099 |
| 3.8E-06 | 0.00028 | 0.00202 | -4E-06  | 0.00014 | 0.00061 |
| 3.8E-06 | -0.0005 | 0.0021  | -8E-05  | -0.0002 | 0.00026 |
| 3.9E-06 | 0.00015 | 0.00145 | 0.00035 | 0.00013 | 0.00059 |
| 3.9E-06 | -0.0006 | 0.00121 | -0.0008 | 0.00025 | -0.0004 |
| 3.9E-06 | -0.0009 | 0.00143 | -0.0003 | 0.00077 | 0.00029 |
| 4E-06   | 5.4E-05 | 0.00134 | -0.0002 | 0.00058 | 0.00063 |
| 4E-06   | -0.0002 | 0.0013  | -4E-05  | 0.00075 | 0.00078 |

|         |         |         |         |         |         |
|---------|---------|---------|---------|---------|---------|
| 4E-06   | -0.0008 | 0.0011  | -0.0007 | 0.00042 | 0.00115 |
| 4.1E-06 | 0.00047 | 0.00133 | -0.0004 | 0.00055 | -3E-05  |
| 4.1E-06 | -0.0009 | 0.00107 | 0.0001  | 0.00034 | 0.00101 |
| 4.1E-06 | -0.0005 | 0.00152 | -3E-05  | 0.00046 | 0.00037 |
| 4.2E-06 | 0.00027 | 0.0016  | -6E-05  | 0.00069 | 6E-08   |
| 4.2E-06 | 0.00028 | 0.00143 | -0.0002 | 0.00108 | 0.00026 |
| 4.2E-06 | -0.0004 | 0.00093 | -0.0003 | 0.00047 | 0.00056 |
| 4.3E-06 | 0.00017 | 0.00106 | -0.001  | 0.00118 | 0.00034 |
| 4.3E-06 | -0.0001 | 0.00059 | -0.0003 | 0.00116 | 0.00048 |
| 4.3E-06 | -0.0008 | 0.00121 | -0.0001 | 0.00061 | 5E-05   |
| 4.4E-06 | 0.00012 | 0.00124 | -0.0004 | 0.00017 | 0.00048 |
| 4.4E-06 | -6E-05  | 0.00078 | -3E-05  | 0.00074 | -0.0004 |
| 4.4E-06 | -0.0008 | 0.00063 | -0.0004 | 0.00076 | 0.00037 |
| 4.4E-06 | -0.0002 | 0.00065 | -0.0004 | -0.0003 | -2E-05  |
| 4.5E-06 | -0.0007 | 0.00157 | -0.0002 | 0.00052 | 0.00045 |
| 4.5E-06 | -0.0006 | 0.00084 | -0.0004 | 0.00074 | 0.00093 |
| 4.5E-06 | -0.0008 | 0.00078 | -0.0002 | 0.00132 | 0.00051 |
| 4.6E-06 | 0.00051 | 0.00048 | -0.0003 | 0.001   | 0.00036 |
| 4.6E-06 | -0.0003 | 0.00122 | -5E-05  | 0.00142 | -0.0001 |
| 4.6E-06 | -0.0008 | 0.00078 | -0.0003 | 0.00037 | 0.00048 |
| 4.7E-06 | -0.0008 | 0.00025 | 1E-04   | 0.00082 | 0.00045 |
| 4.7E-06 | -0.0009 | 0.00027 | -7E-05  | 0.00071 | -0.0003 |
| 4.7E-06 | 0.00048 | 0.00072 | -0.0006 | 0.00093 | 0.00072 |
| 4.8E-06 | -0.0006 | 0.00106 | 2E-05   | 0.00105 | 0.00011 |
| 4.8E-06 | -0.0002 | 0.00111 | -0.0004 | 5.7E-05 | -0.0003 |
| 4.8E-06 | -0.0002 | 0.00118 | -0.0005 | 0.0008  | 3E-05   |
| 4.9E-06 | 0.00044 | 0.00139 | -0.0004 | -0.0004 | 0.00054 |
| 4.9E-06 | -0.0009 | 0.00036 | -0.0003 | 9.1E-05 | -1E-05  |
| 4.9E-06 | -0.0006 | 0.00181 | -3E-05  | 0.00064 | 0.00046 |
| 5E-06   | -0.0002 | 0.00093 | -0.0003 | 0.00068 | -0.0003 |
| 5E-06   | -0.0008 | 0.00057 | 3.5E-05 | 0.00107 | 0.00067 |
| 5E-06   | -0.0014 | 0.00016 | -0.0005 | 0.00012 | 8.3E-05 |
| 5.1E-06 | -0.0015 | 0.00044 | -0.0006 | 0.00071 | 0.0006  |
| 5.1E-06 | -0.0012 | 0.00178 | -0.0011 | 0.0009  | 0.00031 |
| 5.1E-06 | -0.0006 | 0.00026 | 0.00011 | 0.0008  | -2E-05  |
| 5.2E-06 | -0.0008 | 0.00046 | -0.0009 | -4E-05  | -0.0001 |
| 5.2E-06 | -0.0006 | 0.00071 | -0.0012 | 0.00041 | -0.0006 |
| 5.2E-06 | -0.0001 | 0.00153 | -0.0005 | 7.4E-05 | 9.5E-05 |
| 5.2E-06 | -0.0008 | 0.00069 | -0.0004 | 0.00077 | 0.00055 |
| 5.3E-06 | -0.001  | 0.00117 | -4E-05  | 0.00014 | -2E-06  |
| 5.3E-06 | -0.0005 | 0.00055 | -0.0009 | 0.00014 | -0.0003 |
| 5.3E-06 | -0.0014 | 0.00115 | -0.0009 | -0.0004 | 0.00089 |
| 5.4E-06 | -0.0008 | 0.00123 | -0.001  | 0.00044 | 0.0002  |
| 5.4E-06 | -9E-05  | 0.00137 | -0.0008 | 0.00022 | -0.0002 |
| 5.4E-06 | -0.0008 | 0.00101 | -0.0007 | 0.00057 | 0.00029 |
| 5.5E-06 | -0.0008 | 0.00089 | -0.0003 | 0.00026 | 0.00128 |
| 5.5E-06 | -0.002  | 0.00182 | -0.0004 | 0.00035 | 0.0013  |
| 5.5E-06 | -0.0009 | 0.00075 | 0.00074 | 0.00107 | 0.00014 |
| 5.6E-06 | -9E-05  | 0.0007  | -2E-05  | -0.0003 | 0.0005  |
| 5.6E-06 | 0.00016 | 0.00076 | -0.0008 | 0.00033 | 0.00076 |
| 5.6E-06 | -0.0011 | 0.00126 | -0.0004 | 0.00049 | 0.00064 |
| 5.7E-06 | -0.0001 | 3.8E-05 | -8E-05  | -0.0003 | 0.00106 |
| 5.7E-06 | -0.0005 | 0.00091 | -0.0007 | 0.0006  | 0.00068 |
| 5.7E-06 | -0.0013 | 0.00171 | -7E-05  | 0.00064 | 8.9E-05 |

|         |         |         |         |         |         |
|---------|---------|---------|---------|---------|---------|
| 5.8E-06 | -0.0012 | 0.00104 | -0.0006 | 0.00045 | 0.00059 |
| 5.8E-06 | -0.0003 | -4E-06  | -0.0003 | -0.0002 | 0.00084 |
| 5.8E-06 | -0.0003 | 0.00052 | 1E-05   | 0.00021 | 0.00056 |
| 5.9E-06 | -0.0006 | 0.00056 | 0.00014 | 0.00028 | 0.00017 |
| 5.9E-06 | -0.0005 | 0.00103 | -0.0005 | 0.00072 | -0.0006 |
| 5.9E-06 | 0.00012 | 0.00068 | -0.0009 | 0.00075 | 0.00047 |
| 6E-06   | -0.0002 | 0.00022 | -0.0012 | 0.00091 | 4.7E-05 |
| 6E-06   | -0.0008 | 0.00088 | -0.0008 | 0.0004  | 0.00025 |
| 6E-06   | -0.0009 | 0.00125 | -0.0003 | 0.00076 | 0.00054 |
| 6E-06   | -0.0002 | 0.00058 | 0.00015 | 0.00055 | 0.00038 |
| 6.1E-06 | -0.0008 | 0.00116 | -0.0008 | 0.00074 | 2.2E-05 |
| 6.1E-06 | -0.0015 | 0.00082 | 0.00011 | 0.00032 | 0.00063 |
| 6.1E-06 | -0.001  | 0.00084 | -0.0002 | 0.00098 | 0.00061 |
| 6.2E-06 | -0.0006 | 0.00118 | -0.0016 | 0.00016 | 0.00064 |
| 6.2E-06 | -0.001  | 0.00077 | -0.0009 | 0.0004  | -0.0001 |
| 6.2E-06 | -0.0014 | -0.0003 | -0.001  | 0.00031 | 0.00026 |
| 6.3E-06 | -0.0004 | 0.00062 | -0.0003 | 0.00042 | 0.00033 |
| 6.3E-06 | -0.0006 | 0.00102 | -0.0012 | 0.0008  | 0.00042 |
| 6.3E-06 | -0.0006 | 0.0017  | 8.5E-05 | 0.00102 | 0.00022 |
| 6.4E-06 | -0.0006 | 0.00059 | -0.0003 | 0.00059 | 0.00063 |
| 6.4E-06 | -0.001  | 0.0017  | -0.0009 | 0.00029 | 1.6E-05 |
| 6.4E-06 | -0.001  | 0.00072 | -4E-05  | 0.00064 | 0.00016 |
| 6.5E-06 | -0.0007 | -0.0004 | -0.0004 | 0.00091 | 0.00059 |
| 6.5E-06 | -0.0013 | 0.00112 | -0.0011 | 0.00045 | 0.00054 |
| 6.5E-06 | -0.0006 | 0.0005  | -0.0007 | 0.00032 | -0.0002 |
| 6.6E-06 | -0.0009 | 0.00041 | 0.00022 | 2.9E-05 | 0.00054 |
| 6.6E-06 | -0.0005 | 0.00078 | 9.9E-05 | 3.7E-05 | 0.00041 |
| 6.6E-06 | -0.0006 | 0.00027 | -0.0003 | 0.00034 | 0.0005  |
| 6.7E-06 | -0.0013 | 0.00012 | -0.0003 | 0.00044 | 0.00023 |
| 6.7E-06 | -0.0004 | -2E-05  | -0.0008 | 0.00097 | 0.00018 |
| 6.7E-06 | -0.0009 | 0.00038 | -0.0007 | -0.0002 | 0.0005  |
| 6.8E-06 | -0.0011 | 0.00092 | -0.0004 | 0.00058 | 0.00102 |
| 6.8E-06 | -0.001  | 0.0004  | -0.0006 | 0.00049 | 0.0006  |
| 6.8E-06 | -0.0006 | 0.00094 | -0.0011 | 0.00056 | 0.00093 |
| 6.8E-06 | -0.0006 | 0.00123 | -0.001  | 0.00101 | 0.00094 |
| 6.9E-06 | -0.0016 | 0.00048 | 0.00019 | -6E-05  | 0.0006  |
| 6.9E-06 | -0.0006 | 0.00081 | -0.0004 | 0.00127 | 8.8E-05 |
| 6.9E-06 | -0.001  | 0.00034 | 0.00018 | 0.0012  | 0.00068 |
| 7E-06   | -0.0003 | 0.00152 | -0.0007 | 0.00043 | 0.00087 |
| 7E-06   | -0.0009 | 0.0003  | -0.0006 | -9E-05  | 0.00057 |
| 7E-06   | -0.0014 | -0.0007 | -0.0004 | -0.0008 | 0.00044 |
| 7.1E-06 | -0.0009 | 0.00095 | -0.0015 | 4.4E-05 | 0.00047 |
| 7.1E-06 | -0.0005 | 0.00076 | -0.0002 | 0.00059 | -0.0004 |
| 7.1E-06 | -0.0002 | 0.00093 | -0.001  | 0.0008  | 0.00055 |
| 7.2E-06 | -0.0004 | 0.00148 | -0.0004 | -0.0004 | 0.00071 |
| 7.2E-06 | -0.0007 | 0.00085 | -0.0011 | 0.00035 | 0.00079 |
| 7.2E-06 | -0.0011 | 0.00038 | -0.0003 | 0.00046 | 0.00066 |
| 7.3E-06 | -0.0007 | 0.00059 | -0.0005 | 0.00127 | 0.00044 |
| 7.3E-06 | -0.0009 | 0.00127 | -0.0004 | -0.0002 | 0.00047 |
| 7.3E-06 | -0.0014 | 0.0014  | -0.0003 | 0.00072 | -0.0002 |
| 7.4E-06 | -0.001  | 0.00076 | 0.00016 | 0.00013 | 0.00021 |
| 7.4E-06 | -0.0014 | 0.00103 | 0.00044 | 0.00051 | 0.00116 |
| 7.4E-06 | -0.001  | 0.00096 | -0.0001 | 0.00061 | 0.00087 |
| 7.5E-06 | -0.0011 | 0.00038 | -5E-06  | 0.00061 | 0.00054 |

|         |         |         |         |         |         |
|---------|---------|---------|---------|---------|---------|
| 7.5E-06 | -0.0008 | 0.00109 | -0.0005 | 0.0012  | -0.0004 |
| 7.5E-06 | -0.0006 | 0.0006  | -0.0007 | 8.3E-05 | -3E-05  |
| 7.6E-06 | -0.0014 | 0.00118 | -0.0009 | -0.0005 | 0.00046 |
| 7.6E-06 | -0.0006 | 0.00076 | -0.0008 | 0.00038 | -0.0002 |
| 7.6E-06 | -0.0003 | 0.00026 | -9E-05  | 0.00068 | 0.00031 |
| 7.6E-06 | -0.0009 | 0.00071 | -1E-05  | -1E-04  | 0.00053 |
| 7.7E-06 | -0.0007 | 0.00105 | -0.0008 | -0.0004 | -0.0003 |
| 7.7E-06 | -0.0009 | 0.00085 | -0.0002 | -0.0005 | 0.00031 |
| 7.7E-06 | -0.0009 | 0.00137 | 3.2E-05 | 0.00079 | -0.0004 |
| 7.8E-06 | -0.001  | 0.001   | -0.0003 | 0.00108 | 0.00064 |
| 7.8E-06 | -0.001  | 0.00081 | 0.00021 | 0.00074 | 0.00024 |
| 7.8E-06 | -0.0007 | 0.00107 | -0.0006 | 0.00025 | 0.0003  |
| 7.9E-06 | -0.0017 | 0.00088 | 6.4E-05 | 0.00043 | 0.00026 |
| 7.9E-06 | -0.0008 | 0.00057 | -0.0005 | 0.00056 | 0.00015 |
| 7.9E-06 | -0.0011 | 0.00076 | -0.0006 | 0.0005  | -0.0003 |
| 8E-06   | -0.0009 | 0.00108 | -4E-05  | 0.0007  | 0.00024 |
| 8E-06   | -0.0008 | 0.00021 | -2E-05  | -0.0002 | 0.00022 |
| 8E-06   | -0.001  | 0.00027 | -0.0003 | 2.6E-05 | -8E-05  |
| 8.1E-06 | -0.0006 | 0.00079 | 0.00064 | 0.00068 | 0.00029 |
| 8.1E-06 | -0.0013 | 0.00167 | -0.0004 | 0.00099 | 0.0002  |
| 8.1E-06 | -0.0016 | 0.0004  | -0.0003 | 0.00033 | -0.0003 |
| 8.2E-06 | -0.001  | 0.0003  | -0.0004 | -0.0002 | 0.00012 |
| 8.2E-06 | -0.0005 | 0.00109 | 0.0001  | -0.0003 | -0.0001 |
| 8.2E-06 | -0.0013 | 0.00056 | 0.00031 | -0.0003 | 0.00048 |
| 8.3E-06 | -0.0006 | 8.1E-05 | -0.0002 | 9.5E-05 | 0.00035 |
| 8.3E-06 | -0.0008 | 0.00029 | -0.0006 | 0.00108 | 0.00103 |
| 8.3E-06 | -0.0013 | 0.00037 | -0.0008 | 0.00016 | 0.00065 |
| 8.4E-06 | -0.0007 | 0.00023 | 2E-05   | 0.00043 | 0.00022 |
| 8.4E-06 | -0.0013 | 0.00059 | -0.0004 | 0.00031 | 4.7E-06 |
| 8.4E-06 | -0.0004 | 0.00064 | -0.0003 | 0.0015  | 0.00011 |
| 8.4E-06 | -0.001  | 0.00066 | -0.0002 | -0.0003 | 7.3E-05 |
| 8.5E-06 | -0.0004 | 0.00082 | -0.0007 | 0.00101 | 0.00036 |
| 8.5E-06 | -0.0003 | 0.00071 | -0.0005 | 0.0005  | 0.00033 |
| 8.5E-06 | -0.0002 | 0.00105 | -0.0002 | 0.00111 | 0.00077 |
| 8.6E-06 | -0.0006 | 0.00045 | 9.1E-05 | 0.00096 | 3.9E-05 |
| 8.6E-06 | -0.0007 | 0.00062 | -0.0002 | 0.00041 | -0.0007 |
| 8.6E-06 | -0.0002 | 0.00101 | -0.0003 | 0.0002  | 0.00053 |
| 8.7E-06 | -0.001  | 0.00077 | -0.0002 | 0.00017 | 0.00034 |
| 8.7E-06 | -0.0013 | -7E-05  | -0.001  | 0.00122 | 0.00096 |
| 8.7E-06 | -0.0002 | 0.00045 | -0.001  | 0.00099 | 0.00015 |
| 8.8E-06 | -0.0005 | 1.6E-05 | -0.0002 | 0.00045 | 0.00021 |
| 8.8E-06 | -0.0007 | -0.0001 | -0.0001 | 0.00074 | 8.2E-05 |
| 8.8E-06 | -0.0012 | 0.00117 | -0.0009 | -0.0002 | -0.0004 |
| 8.9E-06 | -0.0008 | 0.00025 | -0.0009 | 0.00051 | -9E-05  |
| 8.9E-06 | -0.0014 | 0.00061 | -0.0004 | 8.8E-05 | 5.6E-05 |
| 8.9E-06 | -5E-05  | 7.9E-05 | -0.0006 | 0.0001  | 8E-05   |
| 9E-06   | -0.001  | 0.00073 | -3E-06  | 0.00106 | 0.00052 |
| 9E-06   | -0.001  | 0.00062 | -0.0009 | 0.0007  | 0.00093 |
| 9E-06   | -0.0004 | 0.00111 | -0.0017 | 0.00088 | 0.00031 |
| 9.1E-06 | -0.0014 | 0.00057 | -0.0003 | 0.0009  | 0.00046 |
| 9.1E-06 | -0.0008 | 0.00049 | -0.0009 | -0.0001 | 0.00032 |
| 9.1E-06 | -0.0016 | 0.00143 | -0.0004 | 0.00035 | -0.0003 |
| 9.2E-06 | -0.0014 | -8E-05  | -0.0006 | 0.00063 | -8E-05  |
| 9.2E-06 | -0.0007 | 9.6E-05 | -0.0012 | 0.00019 | 0.00024 |

|         |         |         |         |         |         |
|---------|---------|---------|---------|---------|---------|
| 9.2E-06 | 0.00016 | 0.00056 | -0.0001 | 0.00044 | 0.00058 |
| 9.2E-06 | -0.0008 | 0.00083 | 0.00016 | 0.00052 | -0.0003 |
| 9.3E-06 | -0.0008 | 0.00051 | -0.0003 | 0.00072 | -0.0005 |
| 9.3E-06 | -0.0011 | 0.00105 | -0.001  | 0.00107 | 0.00063 |
| 9.3E-06 | -0.0003 | 0.00098 | -0.0009 | 0.00026 | -0.0002 |
| 9.4E-06 | -0.001  | 0.00125 | -0.0008 | 0.00019 | -8E-05  |
| 9.4E-06 | -0.0005 | 0.00049 | -0.0005 | 0.00106 | 0.00085 |
| 9.4E-06 | -0.0007 | 0.0004  | 6.3E-05 | 0.00089 | -0.0003 |
| 9.5E-06 | -0.0012 | 0.00056 | -0.0005 | 0.00046 | -0.0004 |
| 9.5E-06 | -0.0004 | 0.00061 | -0.0013 | -0.0002 | 0.00079 |
| 9.5E-06 | -0.0005 | 0.0005  | -9E-05  | 0.00065 | -0.0007 |
| 9.6E-06 | -0.0005 | -0.0001 | -0.0004 | 0.00134 | 5.5E-05 |
| 9.6E-06 | -0.0009 | 0.00071 | -0.0004 | 0.00064 | -2E-05  |
| 9.6E-06 | -0.001  | 0.00093 | -0.0007 | 0.00046 | 0.00066 |
| 9.7E-06 | -0.0005 | 0.0011  | -0.001  | 0.00064 | 0.00049 |
| 9.7E-06 | -0.001  | -3E-06  | -0.0008 | 0.00158 | 0.00066 |
| 9.7E-06 | -0.0012 | 0.00113 | 0.00014 | -5E-06  | 8.8E-05 |
| 9.8E-06 | -0.0003 | 0.00085 | -0.0005 | 0.00075 | -0.0004 |
| 9.8E-06 | -0.0013 | 0.00079 | 0.00032 | 0.00022 | -0.0002 |
| 9.8E-06 | -0.001  | 0.00083 | -0.0008 | 0.00056 | 0.00045 |
| 9.9E-06 | -0.0008 | 0.00027 | 0.0001  | 0.00031 | -0.0001 |
| 9.9E-06 | -0.0016 | 0.00033 | 0.00012 | 0.0015  | 0.00079 |
| 9.9E-06 | -0.0014 | 0.00034 | 0.00036 | 0.00095 | 0.00039 |
| 1E-05   | -0.0015 | 0.001   | -0.0012 | 0.00099 | 0.00042 |
| 1E-05   | -0.0007 | 4.3E-05 | -0.0007 | 0.00074 | -7E-05  |
| 1E-05   | -0.0007 | 0.00108 | -0.001  | 0.00048 | -0.0005 |
| 1E-05   | -0.0013 | 0.00088 | -0.0005 | 0.00035 | 0.00074 |
| 1E-05   | -0.0011 | 0.00129 | -0.0003 | 0.00111 | 0.0009  |
| 1E-05   | -0.0003 | 2.5E-05 | 8.6E-05 | 0.00074 | 0.00059 |
| 1E-05   | -0.001  | 0.00039 | 6.5E-05 | 0.00059 | 0.00043 |
| 1E-05   | -0.0007 | 0.00037 | -0.0017 | 0.00028 | 0.00074 |
| 1E-05   | -0.0004 | 0.00143 | -0.0003 | 0.00048 | 0.00105 |
| 1E-05   | -0.0005 | 0.00105 | -0.0005 | 0.00053 | 0.00053 |
| 1E-05   | -0.0011 | 0.00112 | -0.0011 | -8E-05  | 8E-05   |
| 1E-05   | -0.0005 | 0.00152 | 4E-05   | 0.00076 | -4E-05  |
| 1E-05   | -0.0006 | 0.00066 | -0.0015 | 0.00084 | 6.2E-05 |
| 1E-05   | -0.0008 | 0.00055 | -0.0012 | 0.00082 | -9E-05  |
| 1E-05   | -0.0008 | 0.0001  | -0.0005 | 0.00053 | 1.6E-05 |
| 1E-05   | -0.0007 | 0.00057 | -0.0013 | 0.00095 | 0.00014 |
| 1E-05   | -0.0017 | 0.00032 | -1E-04  | -0.0005 | -0.0002 |
| 1.1E-05 | -0.001  | 0.0006  | -5E-05  | 0.0012  | 0.00047 |
| 1.1E-05 | -0.0003 | 0.00071 | -0.0013 | -0.0001 | 0.00087 |
| 1.1E-05 | -0.0007 | 0.00053 | -0.0006 | 9.9E-05 | 0.00034 |
| 1.1E-05 | -0.0007 | 0.00059 | -0.0014 | 0.00137 | 0.00053 |
| 1.1E-05 | -0.0008 | 0.00113 | -0.0011 | 0.00072 | 0.0003  |
| 1.1E-05 | -0.0009 | 0.00071 | -0.0004 | 0.00086 | 0.00073 |
| 1.1E-05 | -0.0008 | 0.00102 | -0.0007 | -0.0002 | 0.00043 |
| 1.1E-05 | -0.0015 | 0.0009  | -0.0013 | 0.00036 | -0.0004 |
| 1.1E-05 | -0.001  | 0.00031 | -0.0006 | 0.0001  | 0.00056 |
| 1.1E-05 | -0.0005 | 0.00103 | -0.0004 | 0.00039 | -0.0001 |
| 1.1E-05 | -0.0007 | 0.00054 | -0.0004 | 0.00218 | 0.00146 |
| 1.1E-05 | 4.3E-05 | 0.00064 | 0.00019 | 0.00034 | 7.1E-05 |
| 1.1E-05 | -0.0006 | 0.00074 | -0.0002 | 0.00068 | 0.00012 |
| 1.1E-05 | -0.0006 | 0.00144 | -3E-05  | 0.001   | 0.0007  |

|         |         |         |         |         |         |
|---------|---------|---------|---------|---------|---------|
| 1.1E-05 | 0.00016 | 0.00084 | -0.0004 | 0.00065 | -0.0011 |
| 1.1E-05 | -0.001  | 0.00018 | -0.0002 | 0.00119 | -0.0004 |
| 1.1E-05 | -0.001  | -5E-05  | -0.0005 | 0.00157 | -9E-05  |
| 1.1E-05 | -0.0005 | -0.0003 | 0.00051 | 0.00111 | -0.0009 |
| 1.1E-05 | -0.0004 | 0.00034 | 0.00105 | 0.00062 | 0.00052 |
| 1.1E-05 | -0.0014 | 0.00063 | 0.00032 | 0.00074 | 0.00054 |
| 1.1E-05 | -0.001  | 0.00035 | -0.0005 | 0.00086 | -0.0003 |
| 1.1E-05 | -0.0006 | 0.00049 | 0.00047 | 0.00105 | 0.00054 |
| 1.1E-05 | -0.0012 | 0.00051 | -0.0003 | 0.00072 | 0.00047 |
| 1.1E-05 | -0.0007 | 0.00089 | 0.0005  | 0.00143 | 0.00071 |
| 1.1E-05 | -0.0015 | 0.00086 | 0.00025 | 0.00084 | 0.00026 |
| 1.1E-05 | -0.0004 | -6E-05  | 0.00071 | 0.00131 | -0.0001 |
| 1.1E-05 | -0.0011 | 0.00048 | -8E-05  | -0.0005 | 0.00019 |
| 1.1E-05 | -0.0007 | 0.00018 | 0.00087 | 0.00071 | 0.00043 |
| 1.1E-05 | -0.0001 | 0.00058 | 6.3E-05 | 0.00061 | -8E-05  |
| 1.1E-05 | -0.0009 | 0.00094 | 0.00011 | 0.00089 | 0.00042 |
| 1.1E-05 | -0.0005 | 0.0004  | -5E-05  | 0.0012  | -0.0005 |
| 1.1E-05 | -0.0004 | 0.00093 | -0.0007 | 0.00088 | 0.0009  |
| 1.2E-05 | -0.0005 | 0.00055 | -0.0007 | 0.0007  | -0.0003 |
| 1.2E-05 | -0.0006 | 0.00047 | 7.1E-05 | 0.00061 | 0.00021 |
| 1.2E-05 | -0.0004 | 0.00113 | -0.0007 | 0.00047 | 0.00035 |
| 1.2E-05 | -0.001  | 0.00145 | 2E-05   | -0.0002 | 5.1E-05 |
| 1.2E-05 | -0.0004 | 0.00099 | -0.0006 | 0.00086 | 0.0002  |
| 1.2E-05 | -0.0006 | 0.00039 | -0.0004 | 0.00046 | 0.00013 |
| 1.2E-05 | -0.0011 | 0.0005  | 0.00074 | 0.00059 | 0.00023 |
| 1.2E-05 | -0.0011 | 3.2E-05 | -0.0002 | 2.2E-05 | 0.00041 |
| 1.2E-05 | -0.0002 | 0.00034 | -0.0009 | 0.00076 | -0.0009 |
| 1.2E-05 | -0.0009 | 0.00125 | -0.0017 | 0.00098 | 0.00073 |
| 1.2E-05 | -0.0003 | 0.00098 | 0.00067 | -2E-05  | -0.0008 |
| 1.2E-05 | -0.0002 | 0.0004  | -0.0008 | 0.0009  | 0.00023 |
| 1.2E-05 | -0.0004 | -1E-04  | -0.0005 | 0.0011  | -0.0005 |
| 1.2E-05 | -0.0004 | 0.00018 | -0.0002 | 0.0014  | 0.00041 |
| 1.2E-05 | -0.0004 | 6.2E-05 | -1E-04  | 0.00109 | -0.0004 |
| 1.2E-05 | -0.0008 | 0.00083 | 0.00029 | 0.0007  | 0.00033 |
| 1.2E-05 | -0.0006 | 0.00042 | -0.0006 | 0.00098 | -0.0001 |
| 1.2E-05 | -0.0009 | 0.00077 | -0.0008 | 0.00142 | 0.00046 |
| 1.2E-05 | -0.0004 | 0.00068 | -0.0013 | 0.00111 | -0.0002 |
| 1.2E-05 | -0.0006 | 0.00028 | -0.0017 | 0.00067 | -0.0007 |
| 1.2E-05 | -0.0004 | 0.00084 | -0.0002 | 0.00088 | -0.0002 |
| 1.2E-05 | -0.0006 | 0.00048 | -0.0002 | 0.00068 | 4.9E-06 |
| 1.2E-05 | -0.0007 | 0.00011 | -0.0008 | 0.00051 | -0.0003 |
| 1.2E-05 | -0.0006 | 0.0012  | 0.00035 | 0.00028 | -0.0003 |
| 1.2E-05 | -0.0009 | 0.00047 | -0.0008 | 0.00151 | 0.00013 |
| 1.2E-05 | -0.0006 | 0.00146 | -0.0001 | 0.0009  | 0.00028 |
| 1.2E-05 | -0.0003 | 0.0007  | -0.0006 | 0.00147 | 0.00038 |
| 1.2E-05 | -0.0008 | 0.00057 | -0.0005 | 0.0007  | 0.00044 |
| 1.2E-05 | -9E-05  | 0.00011 | -0.0003 | 0.00073 | -0.001  |
| 1.2E-05 | -0.0004 | 0.00025 | 0.00012 | 0.00141 | -0.0003 |
| 1.2E-05 | -0.0007 | 7.7E-05 | -0.0002 | 0.00062 | -0.0005 |
| 1.3E-05 | -0.0002 | 0.00027 | -0.0001 | 0.00056 | -3E-05  |
| 1.3E-05 | -0.0008 | 0.00145 | 0.00012 | 0.00053 | 0.00047 |
| 1.3E-05 | -0.0002 | 0.0004  | -0.0009 | 0.0013  | 0.00045 |
| 1.3E-05 | -0.0008 | 0.00064 | -2E-05  | 0.00085 | 0.00029 |
| 1.3E-05 | -0.0007 | 0.00037 | -0.0008 | 0.0018  | 2.3E-05 |

|         |         |         |         |         |         |
|---------|---------|---------|---------|---------|---------|
| 1.3E-05 | -0.0005 | 0.00051 | -0.0013 | 0.00136 | 1.4E-05 |
| 1.3E-05 | -0.0006 | 0.00083 | 3.3E-05 | 0.00051 | -0.0005 |
| 1.3E-05 | -0.0008 | 0.00035 | -0.0005 | 0.00089 | -0.0003 |
| 1.3E-05 | -0.0002 | 0.00038 | -0.0003 | 0.00156 | -0.0007 |
| 1.3E-05 | -0.0004 | 0.0006  | 0.00012 | 0.00082 | -9E-05  |
| 1.3E-05 | -0.0003 | 0.00076 | 0.00028 | 0.00134 | -0.0006 |
| 1.3E-05 | -0.0011 | 0.00096 | 0.00032 | 0.00066 | -0.0001 |
| 1.3E-05 | -0.0008 | 0.0009  | 0.00028 | 0.00092 | -9E-05  |
| 1.3E-05 | -0.0009 | 0.00094 | 6E-05   | 0.00091 | -0.0006 |
| 1.3E-05 | -0.001  | 0.00065 | -0.0007 | 0.00109 | 0.00078 |
| 1.3E-05 | -0.0006 | 0.00139 | -0.0006 | 0.00074 | 0.0004  |
| 1.3E-05 | -0.0006 | 0.00072 | -0.0005 | -1E-05  | 0.00023 |
| 1.3E-05 | -0.0006 | 0.00027 | -0.0006 | 0.00041 | 9.2E-05 |
| 1.3E-05 | -0.0006 | 0.00099 | -0.0012 | 0.00052 | 5.7E-06 |
| 1.3E-05 | -0.0003 | 0.00148 | -6E-05  | 0.00097 | -9E-05  |
| 1.3E-05 | -0.0005 | 0.00125 | -0.0009 | 0.00093 | 0.00019 |
| 1.3E-05 | -0.0004 | 0.00044 | 0.00023 | 0.0013  | -0.0004 |
| 1.3E-05 | -0.0001 | 0.00052 | -0.0004 | 0.001   | 0.00033 |
| 1.3E-05 | -0.001  | 0.00043 | -0.0004 | 0.00098 | -0.0002 |
| 1.3E-05 | -0.0008 | 0.00158 | -0.0013 | 0.0009  | -0.0004 |
| 1.3E-05 | -0.0006 | 0.00107 | -0.0002 | 0.00026 | 0.00047 |
| 1.3E-05 | -0.0014 | 0.00078 | -0.0003 | 0.00086 | 4.8E-05 |
| 1.3E-05 | -0.0007 | 0.00065 | -0.0001 | 0.00021 | -0.0008 |
| 1.3E-05 | -0.0006 | 0.0014  | -0.0007 | 0.00029 | 0.00095 |
| 1.3E-05 | -0.0009 | 0.00058 | -0.0002 | 0.00103 | 0.00017 |
| 1.3E-05 | -0.0003 | 0.0003  | 0.00029 | 0.0008  | 0.00019 |
| 1.4E-05 | -8E-05  | 0.0006  | -0.0004 | 0.00079 | 0.00035 |
| 1.4E-05 | -0.0003 | 0.00079 | -0.0005 | 0.00067 | 0.00094 |
| 1.4E-05 | -0.0005 | 0.00113 | -0.0004 | 0.00056 | -0.0005 |
| 1.4E-05 | -0.0007 | 0.00069 | -0.0002 | 0.00013 | 0.00096 |
| 1.4E-05 | -0.0015 | 0.00112 | -0.001  | 0.00118 | -0.0002 |
| 1.4E-05 | 0.0003  | 0.00106 | 3E-05   | 0.00137 | 0.00015 |
| 1.4E-05 | -0.0008 | 0.0005  | 0.00045 | 0.00083 | 0.00043 |
| 1.4E-05 | -0.0005 | 0.00053 | -0.0005 | 0.00083 | 9.2E-05 |
| 1.4E-05 | -0.0006 | 0.00123 | -0.0005 | 0.00105 | 0.00048 |
| 1.4E-05 | -0.0004 | 0.00185 | 0.00017 | 0.00094 | 2.6E-05 |
| 1.4E-05 | -0.0003 | 0.00166 | -0.0005 | 0.00049 | -9E-05  |
| 1.4E-05 | 0.00023 | 0.00076 | -0.0004 | 0.00141 | 0.00059 |
| 1.4E-05 | -0.0007 | 0.00094 | -0.0002 | 0.001   | 0.00037 |
| 1.4E-05 | -0.0013 | 0.00095 | -0.0002 | 0.00034 | -2E-05  |
| 1.4E-05 | -0.0012 | 0.00123 | -0.0007 | 0.00118 | 0.00076 |
| 1.4E-05 | -0.0009 | 0.00038 | -0.0007 | 0.00123 | 0.00021 |
| 1.4E-05 | -0.0008 | -0.0001 | -0.0006 | 0.00089 | 0.00115 |
| 1.4E-05 | -0.0006 | 0.00016 | 0.00048 | 0.00089 | -0.0004 |
| 1.4E-05 | -0.0008 | 0.00042 | -0.0007 | 0.0011  | 0.00056 |
| 1.4E-05 | -0.0002 | 0.00147 | 0.00031 | 0.00067 | 9.2E-05 |
| 1.4E-05 | 1.2E-06 | 0.00105 | -0.0004 | 0.00196 | 1.9E-05 |
| 1.4E-05 | -0.0008 | 0.00083 | -0.0005 | 0.00107 | -8E-05  |
| 1.4E-05 | -0.0008 | 9.6E-05 | -0.0003 | 0.00136 | 0.00048 |
| 1.4E-05 | -0.0006 | 0.00148 | -0.0005 | 1.7E-05 | 0.00016 |
| 1.4E-05 | -0.0007 | 0.00085 | -0.0005 | -4E-05  | 0.00028 |
| 1.4E-05 | 7.2E-05 | 0.00084 | 0.00036 | 1.2E-05 | -0.0003 |
| 1.4E-05 | -0.0005 | 0.00108 | 0.00041 | 0.00141 | 0.00058 |
| 1.4E-05 | -0.0006 | 0.00094 | -0.0008 | 0.00129 | 0.00014 |



|         |         |         |         |         |         |
|---------|---------|---------|---------|---------|---------|
| 1.4E-05 | 4.5E-05 | 0.00112 | -0.0003 | 0.00145 | 0.00013 |
| 1.4E-05 | -0.0007 | 0.00101 | -0.0006 | 0.00142 | 0.00053 |
| 1.4E-05 | -0.0005 | -0.0003 | -0.0008 | 0.00066 | -0.0003 |
| 1.5E-05 | -0.001  | -3E-05  | -0.0001 | 0.00076 | 7.9E-05 |
| 1.5E-05 | -0.001  | 0.00115 | -0.0009 | 0.00138 | -0.0003 |
| 1.5E-05 | -0.0006 | 0.00078 | -0.0005 | 0.00075 | 3.8E-05 |
| 1.5E-05 | 8.8E-05 | 0.0008  | -0.0008 | 0.00074 | -0.0006 |
| 1.5E-05 | -0.0008 | 0.00133 | -0.0004 | 0.00106 | -0.0005 |
| 1.5E-05 | -0.001  | 0.00065 | -0.0005 | 0.00068 | -9E-05  |
| 1.5E-05 | -0.0009 | 0.00066 | -0.0007 | 0.00084 | 0.00019 |
| 1.5E-05 | -0.0004 | 0.001   | 8.9E-05 | 0.00039 | 0.00114 |
| 1.5E-05 | -0.0008 | 0.00105 | -0.0004 | 0.00125 | -3E-05  |
| 1.5E-05 | -0.001  | 0.00078 | -0.0007 | 0.00071 | 0.00059 |
| 1.5E-05 | -0.0009 | -8E-06  | -0.0005 | 0.00105 | 0.00017 |
| 1.5E-05 | -0.0006 | 0.00111 | -0.0008 | 0.00111 | 0.00097 |
| 1.5E-05 | -0.0006 | 0.00145 | -0.0003 | 0.00095 | -0.0002 |
| 1.5E-05 | -0.0005 | 0.00086 | -0.0002 | 0.00107 | -0.0001 |
| 1.5E-05 | -0.0001 | 0.00096 | -0.0007 | 0.00153 | -0.0004 |
| 1.5E-05 | -0.0005 | -0.0004 | -0.0003 | 0.00094 | 0.00035 |

**Table SI.11:** Primary kinetic data for the reaction of 1-methyl- $\epsilon$ -caprolactam (**S11**) with CumO $\bullet$  generated by 355 nm LFP in MeCN (**Figure SI.11**).

| t / s   | $\Delta A$ 1-methyl- $\epsilon$ -caprolactam ( <b>S11</b> ) |               |               |               |               |
|---------|-------------------------------------------------------------|---------------|---------------|---------------|---------------|
|         | <b>0.060M</b>                                               | <b>0.157M</b> | <b>0.271M</b> | <b>0.436M</b> | <b>0.645M</b> |
| -1E-06  | -0.0002                                                     | 0.00021       | -0.0007       | 0.00037       | 0.00048       |
| -1E-06  | -0.001                                                      | 0.00045       | -0.0007       | 0.00083       | 0.0006        |
| -9E-07  | -0.0001                                                     | 0.00036       | -0.001        | 0.00011       | 0.00135       |
| -9E-07  | -0.0001                                                     | 6E-05         | 2.2E-05       | 0.00105       | 0.00085       |
| -9E-07  | 0.0001                                                      | 0.00029       | -0.0001       | -4E-05        | 0.00026       |
| -8E-07  | -0.0008                                                     | 0.0007        | -0.0006       | 0.00076       | 0.00094       |
| -8E-07  | 0.00014                                                     | 0.0005        | -0.0005       | 0.00055       | 0.00069       |
| -8E-07  | 0.00044                                                     | 0.00088       | -0.0003       | 0.00013       | 0.00051       |
| -7E-07  | -0.0005                                                     | 0.00017       | -0.0001       | 0.00011       | 0.00058       |
| -7E-07  | 0.00021                                                     | 0.00037       | -0.0001       | -3E-05        | 0.00082       |
| -7E-07  | 4.1E-05                                                     | 3.4E-05       | -0.0008       | 0.00051       | 0.00113       |
| -6E-07  | -0.0002                                                     | -4E-05        | -0.0002       | -8E-05        | 0.00065       |
| -6E-07  | 0.00015                                                     | -0.0002       | -0.0007       | 0.00039       | 0.00094       |
| -6E-07  | -7E-05                                                      | 0.00021       | -0.0005       | -0.0004       | 0.00048       |
| -5E-07  | -0.0002                                                     | 5.9E-05       | -0.0007       | 0.00029       | 0.00097       |
| -5E-07  | -7E-05                                                      | 0.00041       | -0.0005       | 0.0008        | 0.00066       |
| -5E-07  | -3E-05                                                      | 6.4E-05       | -0.0003       | -1E-05        | 0.00031       |
| -4E-07  | 0.00019                                                     | 0.00045       | 3.7E-06       | 0.00069       | 0.00084       |
| -4E-07  | 0.00032                                                     | 0.00056       | 0.00053       | 0.00055       | 0.0005        |
| -4E-07  | 0.00017                                                     | 0.00069       | -0.0002       | 0.00098       | 0.00095       |
| -4E-07  | -0.0005                                                     | 0.00082       | -0.0007       | -0.0002       | 0.00132       |
| -3E-07  | 0.00027                                                     | 0.0007        | -0.0004       | -2E-05        | 0.00037       |
| -3E-07  | 0.00011                                                     | -0.0003       | -0.0009       | 0.00053       | 0.00097       |
| -3E-07  | -0.0007                                                     | 0.0008        | -0.0009       | 0.00067       | 0.00084       |
| -2E-07  | -9E-05                                                      | 0.00087       | -0.0005       | 0.00015       | 5.8E-05       |
| -2E-07  | -0.0008                                                     | 0.00114       | -0.0003       | 0.00053       | 0.00077       |
| -2E-07  | 0.00025                                                     | 0.00044       | -0.0005       | 0.00014       | 0.00125       |
| -1E-07  | 0.00047                                                     | 0.00073       | -0.0009       | 0.00012       | 0.00126       |
| -1E-07  | 0.00033                                                     | 0.00062       | -0.0006       | 0.00081       | 0.00081       |
| -6E-08  | 0.00013                                                     | 0.00069       | -0.0003       | 0.00081       | 0.00066       |
| -3E-08  | -0.0008                                                     | 0.00118       | -0.0005       | 0.00026       | 0.00023       |
| -3E-10  | -0.0032                                                     | -0.0016       | -0.0038       | -0.0026       | -0.0031       |
| 3.2E-08 | -0.0031                                                     | -0.0032       | -0.0058       | -0.0043       | -0.0055       |
| 6.4E-08 | 0.02008                                                     | 0.01979       | 0.01873       | 0.01876       | 0.01921       |
| 9.6E-08 | 0.01998                                                     | 0.02008       | 0.01911       | 0.01842       | 0.0182        |
| 1.3E-07 | 0.01859                                                     | 0.02          | 0.01762       | 0.01755       | 0.01676       |
| 1.6E-07 | 0.0182                                                      | 0.01927       | 0.01673       | 0.01601       | 0.01563       |
| 1.9E-07 | 0.01758                                                     | 0.01846       | 0.01653       | 0.01543       | 0.01493       |
| 2.2E-07 | 0.01719                                                     | 0.01752       | 0.01606       | 0.01481       | 0.01349       |
| 2.6E-07 | 0.01698                                                     | 0.01637       | 0.01579       | 0.01396       | 0.01313       |
| 2.9E-07 | 0.01631                                                     | 0.01675       | 0.0145        | 0.01353       | 0.01224       |
| 3.2E-07 | 0.01603                                                     | 0.01548       | 0.01294       | 0.01312       | 0.01059       |
| 3.5E-07 | 0.01542                                                     | 0.01516       | 0.01224       | 0.01294       | 0.01113       |
| 3.8E-07 | 0.01485                                                     | 0.0144        | 0.01253       | 0.01149       | 0.00957       |
| 4.2E-07 | 0.01474                                                     | 0.01408       | 0.01135       | 0.01139       | 0.00992       |
| 4.5E-07 | 0.01401                                                     | 0.01315       | 0.01134       | 0.01072       | 0.00862       |
| 4.8E-07 | 0.01285                                                     | 0.01296       | 0.01058       | 0.01012       | 0.00814       |
| 5.1E-07 | 0.01262                                                     | 0.01312       | 0.01044       | 0.00889       | 0.00728       |
| 5.4E-07 | 0.01234                                                     | 0.01265       | 0.01011       | 0.00912       | 0.00769       |

|         |         |         |         |         |         |
|---------|---------|---------|---------|---------|---------|
| 5.8E-07 | 0.01287 | 0.01188 | 0.00914 | 0.00847 | 0.00659 |
| 6.1E-07 | 0.01287 | 0.01171 | 0.00905 | 0.00739 | 0.00742 |
| 6.4E-07 | 0.01205 | 0.01151 | 0.00772 | 0.00757 | 0.00683 |
| 6.7E-07 | 0.01226 | 0.01058 | 0.00815 | 0.007   | 0.00677 |
| 7E-07   | 0.01089 | 0.00999 | 0.00759 | 0.00642 | 0.0052  |
| 7.4E-07 | 0.01092 | 0.00915 | 0.00743 | 0.00715 | 0.00559 |
| 7.7E-07 | 0.01079 | 0.0094  | 0.00678 | 0.00568 | 0.00533 |
| 8E-07   | 0.01011 | 0.00959 | 0.00678 | 0.0057  | 0.00502 |
| 8.3E-07 | 0.00957 | 0.00928 | 0.00661 | 0.00609 | 0.00458 |
| 8.6E-07 | 0.00903 | 0.00915 | 0.00654 | 0.00544 | 0.00506 |
| 9E-07   | 0.00914 | 0.00796 | 0.00545 | 0.00491 | 0.00423 |
| 9.3E-07 | 0.00884 | 0.0082  | 0.00541 | 0.00473 | 0.00372 |
| 9.6E-07 | 0.0087  | 0.00814 | 0.00523 | 0.00537 | 0.00374 |
| 9.9E-07 | 0.0091  | 0.00691 | 0.00518 | 0.00502 | 0.00403 |
| 1E-06   | 0.00875 | 0.00678 | 0.00461 | 0.00419 | 0.0034  |
| 1.1E-06 | 0.00823 | 0.00676 | 0.00496 | 0.00376 | 0.00316 |
| 1.1E-06 | 0.00788 | 0.00743 | 0.00416 | 0.00371 | 0.0028  |
| 1.1E-06 | 0.00774 | 0.00657 | 0.00499 | 0.00338 | 0.00307 |
| 1.2E-06 | 0.00796 | 0.00704 | 0.00373 | 0.00306 | 0.00285 |
| 1.2E-06 | 0.0071  | 0.00703 | 0.0034  | 0.0035  | 0.00359 |
| 1.2E-06 | 0.00729 | 0.00593 | 0.00422 | 0.00324 | 0.00276 |
| 1.2E-06 | 0.00676 | 0.00659 | 0.00378 | 0.00358 | 0.00254 |
| 1.3E-06 | 0.00621 | 0.00555 | 0.00391 | 0.00283 | 0.00287 |
| 1.3E-06 | 0.00609 | 0.00636 | 0.00406 | 0.00284 | 0.00347 |
| 1.3E-06 | 0.00626 | 0.0061  | 0.00397 | 0.00262 | 0.00303 |
| 1.4E-06 | 0.00647 | 0.00556 | 0.00351 | 0.00229 | 0.00258 |
| 1.4E-06 | 0.00574 | 0.00493 | 0.00315 | 0.00317 | 0.00225 |
| 1.4E-06 | 0.00573 | 0.00537 | 0.00325 | 0.0021  | 0.00199 |
| 1.5E-06 | 0.00564 | 0.00528 | 0.00338 | 0.00262 | 0.00162 |
| 1.5E-06 | 0.00533 | 0.00561 | 0.003   | 0.00225 | 0.00307 |
| 1.5E-06 | 0.00631 | 0.00451 | 0.00333 | 0.00274 | 0.00249 |
| 1.6E-06 | 0.00504 | 0.00465 | 0.00272 | 0.00249 | 0.00289 |
| 1.6E-06 | 0.00568 | 0.00519 | 0.00305 | 0.00215 | 0.00241 |
| 1.6E-06 | 0.00505 | 0.00393 | 0.00232 | 0.00189 | 0.00299 |
| 1.7E-06 | 0.0052  | 0.00412 | 0.00177 | 0.00221 | 0.00326 |
| 1.7E-06 | 0.00515 | 0.00428 | 0.0026  | 0.00274 | 0.00217 |
| 1.7E-06 | 0.00506 | 0.00492 | 0.00181 | 0.00161 | 0.00245 |
| 1.8E-06 | 0.00469 | 0.0038  | 0.00256 | 0.00169 | 0.00183 |
| 1.8E-06 | 0.00473 | 0.00392 | 0.00223 | 0.00211 | 0.0021  |
| 1.8E-06 | 0.00466 | 0.00363 | 0.00226 | 0.00202 | 0.00236 |
| 1.9E-06 | 0.0046  | 0.00372 | 0.00206 | 0.00088 | 0.00187 |
| 1.9E-06 | 0.00361 | 0.00472 | 0.00201 | 0.00202 | 0.00128 |
| 1.9E-06 | 0.00392 | 0.00309 | 0.00264 | 0.00166 | 0.00189 |
| 2E-06   | 0.00432 | 0.00438 | 0.00191 | 0.00186 | 0.00241 |
| 2E-06   | 0.00408 | 0.00401 | 0.0019  | 0.00128 | 0.0029  |
| 2E-06   | 0.00405 | 0.00372 | 0.00149 | 0.00128 | 0.00177 |
| 2E-06   | 0.00416 | 0.00246 | 0.00197 | 0.00111 | 0.00164 |
| 2.1E-06 | 0.00342 | 0.00247 | 0.00158 | 0.00136 | 0.00111 |
| 2.1E-06 | 0.00322 | 0.00312 | 0.00211 | 0.00207 | 0.00238 |
| 2.1E-06 | 0.00352 | 0.0031  | 0.00226 | 0.00175 | 0.00161 |
| 2.2E-06 | 0.00377 | 0.00392 | 0.00208 | 0.00093 | 0.00174 |
| 2.2E-06 | 0.0029  | 0.00301 | 0.00144 | 0.00197 | 0.00151 |
| 2.2E-06 | 0.00298 | 0.00343 | 0.00216 | 0.00085 | 0.00149 |
| 2.3E-06 | 0.00293 | 0.00321 | 0.00205 | 0.00106 | 0.0013  |

|         |         |         |         |         |         |
|---------|---------|---------|---------|---------|---------|
| 2.3E-06 | 0.00305 | 0.00327 | 0.00193 | 0.00098 | 0.00133 |
| 2.3E-06 | 0.00338 | 0.00229 | 0.00115 | 0.00176 | 0.00172 |
| 2.4E-06 | 0.00286 | 0.00255 | 0.00048 | 0.00154 | 0.00193 |
| 2.4E-06 | 0.00311 | 0.00251 | 0.00117 | 0.00094 | 0.00144 |
| 2.4E-06 | 0.00281 | 0.00234 | 0.00167 | 0.00095 | 0.00172 |
| 2.5E-06 | 0.00215 | 0.00253 | 0.00173 | 0.00128 | 0.00137 |
| 2.5E-06 | 0.00323 | 0.00253 | 0.00118 | 0.00103 | 0.00196 |
| 2.5E-06 | 0.00243 | 0.00262 | 0.00079 | 0.00091 | 0.00183 |
| 2.6E-06 | 0.00249 | 0.00312 | 0.00154 | 0.00107 | 0.00291 |
| 2.6E-06 | 0.00297 | 0.00289 | 0.00172 | 0.00159 | 0.00192 |
| 2.6E-06 | 0.00258 | 0.00252 | 0.00128 | 0.00098 | 0.00194 |
| 2.7E-06 | 0.00224 | 0.00276 | 0.00147 | 0.00181 | 0.00176 |
| 2.7E-06 | 0.00227 | 0.0029  | 0.00114 | 0.00108 | 0.00161 |
| 2.7E-06 | 0.00254 | 0.0025  | 0.00147 | 0.00096 | 0.00167 |
| 2.8E-06 | 0.00201 | 0.00206 | 0.00216 | 0.00161 | 0.00266 |
| 2.8E-06 | 0.00208 | 0.00244 | 0.00161 | 0.00159 | 0.00213 |
| 2.8E-06 | 0.0025  | 0.00239 | 0.0008  | 0.00173 | 0.00208 |
| 2.8E-06 | 0.00225 | 0.00188 | 0.00153 | 0.00099 | 0.00137 |
| 2.9E-06 | 0.0021  | 0.0022  | 0.00099 | 0.00074 | 0.00162 |
| 2.9E-06 | 0.00252 | 0.00197 | 0.00065 | 0.00093 | 0.00149 |
| 2.9E-06 | 0.00168 | 0.0017  | 0.00195 | 0.00041 | 0.00171 |
| 3E-06   | 0.00248 | 0.00271 | 0.00156 | 0.00092 | 0.0019  |
| 3E-06   | 0.00221 | 0.00184 | 0.0012  | 0.00135 | 0.00146 |
| 3E-06   | 0.00182 | 0.00162 | 7.1E-05 | 0.0008  | 0.00198 |
| 3.1E-06 | 0.0019  | 0.00252 | 0.00094 | 0.00115 | 0.00124 |
| 3.1E-06 | 0.00123 | 0.00187 | 0.00198 | 0.00106 | 0.00272 |
| 3.1E-06 | 0.00221 | 0.00207 | 0.00055 | 0.00091 | 0.00163 |
| 3.2E-06 | 0.0014  | 0.00258 | 0.00063 | 0.00055 | 0.00178 |
| 3.2E-06 | 0.00262 | 0.00168 | 0.00027 | 0.0007  | 0.00246 |
| 3.2E-06 | 0.00176 | 0.00224 | 0.00116 | 0.00132 | 0.0022  |
| 3.3E-06 | 0.00155 | 0.00229 | 0.00096 | 0.00093 | 0.00115 |
| 3.3E-06 | 0.00167 | 0.00187 | 0.001   | 0.001   | 0.00125 |
| 3.3E-06 | 0.00187 | 0.00133 | 0.00112 | 0.00067 | 0.00135 |
| 3.4E-06 | 0.0025  | 0.00223 | 0.00144 | 0.00098 | 0.00109 |
| 3.4E-06 | 0.00168 | 0.00213 | 0.00069 | 0.00042 | 0.00162 |
| 3.4E-06 | 0.0012  | 0.00108 | 0.00099 | 0.00137 | 0.00131 |
| 3.5E-06 | 0.00101 | 0.00212 | 0.00015 | 0.00123 | 0.00181 |
| 3.5E-06 | 0.00109 | 0.00229 | 0.00079 | 0.00137 | 0.00148 |
| 3.5E-06 | 0.0019  | 0.00157 | 0.00121 | 0.00109 | 0.00177 |
| 3.6E-06 | 0.00169 | 0.00265 | 0.00044 | 0.00146 | 0.00282 |
| 3.6E-06 | 0.00114 | 0.00227 | 0.00039 | 0.00115 | 0.00152 |
| 3.6E-06 | 0.00158 | 0.00229 | 0.0001  | 0.00046 | 0.00126 |
| 3.6E-06 | 0.0017  | 0.00108 | -0.0004 | 0.001   | 0.00188 |
| 3.7E-06 | 0.00104 | 0.00066 | 0.00019 | 0.00032 | 0.00145 |
| 3.7E-06 | 0.00111 | 0.00203 | 0.00085 | 0.00036 | 0.00125 |
| 3.7E-06 | 0.00098 | 0.00126 | 0.0003  | 0.00081 | 0.00268 |
| 3.8E-06 | 0.00017 | 0.00229 | 0.00057 | 0.00078 | 0.00116 |
| 3.8E-06 | 0.00067 | 0.0012  | 0.00105 | 0.00098 | 0.00198 |
| 3.8E-06 | 0.00114 | 0.00198 | 0.00081 | 0.00074 | 0.002   |
| 3.9E-06 | 0.00116 | 0.00143 | 0.00058 | 0.00094 | 0.00112 |
| 3.9E-06 | 0.00099 | 0.00084 | 8.9E-05 | 0.00092 | 0.00209 |
| 3.9E-06 | 0.00063 | 0.00171 | 0.0009  | 0.0007  | 0.00118 |
| 4E-06   | 0.00094 | 0.0015  | 0.00033 | 0.00125 | 0.00123 |
| 4E-06   | 0.00091 | 0.00108 | -5E-05  | 0.00054 | 0.00182 |

|         |         |         |         |         |         |
|---------|---------|---------|---------|---------|---------|
| 4E-06   | 0.00115 | 0.00148 | 0.00033 | 0.00067 | 0.0011  |
| 4.1E-06 | 0.00076 | 0.00212 | 0.00038 | 0.0017  | 0.00202 |
| 4.1E-06 | 0.00034 | 0.00162 | 0.00036 | 0.00085 | 0.00173 |
| 4.1E-06 | 0.00127 | 0.00215 | 0.00032 | 0.00135 | 0.00097 |
| 4.2E-06 | 0.00122 | 0.00208 | 0.00036 | 0.00089 | 0.00127 |
| 4.2E-06 | 0.0018  | 0.00156 | 0.00013 | 0.00098 | 0.00145 |
| 4.2E-06 | 0.00153 | 0.00106 | 8.3E-05 | 0.00088 | 0.00183 |
| 4.3E-06 | 0.00092 | 0.00147 | 8E-05   | 0.00109 | 0.00185 |
| 4.3E-06 | 0.00078 | 0.00079 | 0.00126 | 0.00068 | 0.00164 |
| 4.3E-06 | 0.00084 | 0.0018  | 0.00044 | 0.0003  | 0.00109 |
| 4.4E-06 | 0.00092 | 0.00136 | 0.00037 | 0.0007  | 0.00169 |
| 4.4E-06 | 0.00051 | 0.00191 | 0.0005  | 0.00085 | 0.00103 |
| 4.4E-06 | 0.00078 | 0.00146 | 0.00104 | 0.00055 | 0.00162 |
| 4.4E-06 | 0.00127 | 0.00217 | 0.00101 | 0.00115 | 0.00107 |
| 4.5E-06 | 0.0004  | 0.00238 | 0.00096 | 0.00103 | 0.00178 |
| 4.5E-06 | 0.00073 | 0.00224 | 0.00036 | 0.00064 | 0.00237 |
| 4.5E-06 | 0.00073 | 0.00128 | -0.0003 | 0.001   | 0.00114 |
| 4.6E-06 | 0.00103 | 0.00113 | -0.0001 | 0.00093 | 0.00136 |
| 4.6E-06 | 0.00068 | 0.00171 | 0.00051 | 0.00111 | 0.00257 |
| 4.6E-06 | 0.00057 | 0.00154 | 0.00037 | 0.00075 | 0.00182 |
| 4.7E-06 | 0.00094 | 0.0018  | 0.00073 | 0.0004  | 0.00184 |
| 4.7E-06 | 0.00136 | 0.00153 | 0.00018 | 0.00071 | 0.00069 |
| 4.7E-06 | 0.00036 | 0.00164 | 0.00016 | 0.00063 | 0.00156 |
| 4.8E-06 | 0.00055 | 0.00071 | -0.0002 | 0.00061 | 0.00126 |
| 4.8E-06 | 0.00046 | 0.00077 | -7E-05  | 0.00076 | 0.00118 |
| 4.8E-06 | 0.00023 | 0.00118 | 0.0003  | 0.00033 | 0.00157 |
| 4.9E-06 | 0.0008  | 0.00156 | 0.00073 | 0.00113 | 0.00164 |
| 4.9E-06 | 0.00034 | 0.00164 | 9E-05   | 0.00097 | 0.00195 |
| 4.9E-06 | 0.00049 | 0.00117 | 0.00044 | 0.00094 | 0.00156 |
| 5E-06   | 0.00046 | 0.00123 | 0.00072 | 0.0009  | 0.0022  |
| 5E-06   | 0.0013  | 0.00139 | 0.00056 | 0.00157 | 0.00135 |
| 5E-06   | 0.0006  | 0.00082 | 0.00105 | 0.00104 | 0.0013  |
| 5.1E-06 | 0.00103 | 0.0018  | -5E-05  | 0.00032 | 0.00119 |
| 5.1E-06 | 0.0006  | 0.00144 | 0.00057 | 0.00122 | 0.00183 |
| 5.1E-06 | 0.00043 | 0.00123 | 0.00058 | 0.00161 | 0.00185 |
| 5.2E-06 | 0.00043 | 0.00092 | 0.00059 | 0.00109 | 0.00213 |
| 5.2E-06 | 0.00111 | 0.0012  | 0.00113 | 0.00117 | 0.00193 |
| 5.2E-06 | 0.00082 | 0.00185 | 0.0004  | 0.00165 | 0.00164 |
| 5.2E-06 | 0.00032 | 0.00153 | -6E-05  | 0.0007  | 0.00149 |
| 5.3E-06 | 0.00059 | 0.00101 | 1.1E-05 | 0.00141 | 0.00187 |
| 5.3E-06 | 0.00128 | 0.00144 | -0.0002 | 0.00115 | 0.0019  |
| 5.3E-06 | 0.00133 | 0.00128 | 0.00065 | 0.00072 | 0.00117 |
| 5.4E-06 | 0.00055 | 0.0016  | 0.00071 | 0.00124 | 0.00171 |
| 5.4E-06 | 0.00068 | 0.00143 | -0.0008 | 0.00127 | 0.0021  |
| 5.4E-06 | 0.00098 | 0.00119 | -1E-05  | 0.00045 | 0.00256 |
| 5.5E-06 | 0.00058 | 0.00145 | 0.0014  | 0.00075 | 0.00199 |
| 5.5E-06 | 0.00065 | 0.00137 | 0.00044 | 0.00074 | 0.00146 |
| 5.5E-06 | 0.00073 | 0.0011  | 0.00019 | 0.001   | 0.0016  |
| 5.6E-06 | 0.00067 | 0.00142 | 0.00089 | 0.00135 | 0.00186 |
| 5.6E-06 | 0.00038 | 0.0009  | 0.0006  | 0.00089 | 0.00148 |
| 5.6E-06 | 0.00119 | 0.00058 | 0.00028 | 0.00069 | 0.00164 |
| 5.7E-06 | 0.00078 | 0.0016  | -3E-05  | 0.00054 | 0.00165 |
| 5.7E-06 | 0.00057 | 0.00127 | 0.00099 | 0.00091 | 0.00087 |
| 5.7E-06 | 0.00038 | 0.00162 | 4.1E-05 | -8E-05  | 0.00144 |

|         |         |         |         |         |         |
|---------|---------|---------|---------|---------|---------|
| 5.8E-06 | 0.00046 | 0.00149 | 0.00106 | 0.00069 | 0.00195 |
| 5.8E-06 | 0.00033 | 0.00148 | 0.00046 | 0.00092 | 0.00135 |
| 5.8E-06 | 0.00068 | 0.00113 | 0.0011  | 0.00088 | 0.00118 |
| 5.9E-06 | 0.00047 | 0.00145 | 0.00079 | 0.00039 | 0.00176 |
| 5.9E-06 | 0.00057 | 0.00155 | 0.0009  | 0.00105 | 0.00215 |
| 5.9E-06 | 2.1E-05 | 0.00118 | 8E-05   | 0.00129 | 0.00181 |
| 6E-06   | 0.0005  | 0.00087 | -7E-05  | 0.00105 | 0.00167 |
| 6E-06   | 0.0006  | 0.00067 | 0.00077 | 0.00104 | 0.00089 |
| 6E-06   | 0.00054 | 0.00183 | -3E-05  | 2.7E-05 | 0.00171 |
| 6E-06   | 0.00034 | 0.00114 | 9.6E-05 | 0.00078 | 0.00158 |
| 6.1E-06 | 0.00052 | 0.00196 | 0.0004  | 0.00133 | 0.00168 |
| 6.1E-06 | 0.00095 | 0.0016  | 0.00014 | 0.0004  | 0.00101 |
| 6.1E-06 | 0.00087 | 0.00087 | 0.00093 | 0.00108 | 0.00147 |
| 6.2E-06 | 0.0007  | 0.00103 | 0.00021 | 0.00011 | 0.00055 |
| 6.2E-06 | 0.00051 | 0.00089 | -0.0004 | 0.0005  | 0.00116 |
| 6.2E-06 | 0.00085 | 0.00117 | 0.00072 | -0.0007 | 0.00151 |
| 6.3E-06 | 0.00056 | 0.00089 | 0.00026 | 0.00059 | 0.00147 |
| 6.3E-06 | 0.00031 | 0.00118 | 0.00045 | 0.00174 | 0.00182 |
| 6.3E-06 | -5E-07  | 0.00207 | 4.2E-05 | 0.0012  | 0.0018  |
| 6.4E-06 | -5E-05  | 0.00104 | 0.00056 | 0.0009  | 0.00113 |
| 6.4E-06 | 0.00018 | 0.00121 | 0.00066 | 0.00061 | 0.00074 |
| 6.4E-06 | -3E-05  | 0.00119 | 0.00078 | 0.00127 | 0.00149 |
| 6.5E-06 | -0.0002 | 0.00099 | 0.00099 | 0.00139 | 0.0017  |
| 6.5E-06 | 0.00018 | 0.0011  | 0.0005  | 0.00162 | 0.00149 |
| 6.5E-06 | 0.00013 | 0.00081 | 0.00042 | 0.001   | 0.00169 |
| 6.6E-06 | 0.0004  | 0.00115 | 0.0005  | 0.0011  | 0.00163 |
| 6.6E-06 | 0.00059 | 0.00106 | -0.0005 | 0.00062 | 0.00126 |
| 6.6E-06 | 0.00027 | 0.00057 | 9.7E-05 | 0.00097 | 0.00199 |
| 6.7E-06 | -0.0001 | 0.00073 | 0.00084 | 0.0009  | 0.00168 |
| 6.7E-06 | -0.0007 | 0.00092 | 0.00058 | 0.00065 | 0.00155 |
| 6.7E-06 | 0.00035 | 0.00095 | 5.2E-06 | 0.00136 | 0.00144 |
| 6.8E-06 | -0.0006 | 0.0006  | 0.00138 | 0.00129 | 0.00178 |
| 6.8E-06 | 0.0004  | 0.00152 | -0.0001 | 0.00054 | 0.00137 |
| 6.8E-06 | 0.00024 | 0.00118 | 0.00026 | 0.00033 | 0.00135 |
| 6.8E-06 | -2E-05  | 0.00117 | 3.4E-05 | 0.00056 | 0.00089 |
| 6.9E-06 | -8E-05  | 0.00097 | 0.00049 | 0.00152 | 0.00122 |
| 6.9E-06 | 0.00041 | 0.00102 | 0.00068 | 0.00023 | 0.00102 |
| 6.9E-06 | 0.00028 | 0.00129 | 0.00084 | -0.0003 | 0.00107 |
| 7E-06   | 0.00052 | 0.00097 | 0.00032 | 0.00064 | 0.00096 |
| 7E-06   | 0.00013 | 0.00106 | 0.0009  | 0.00095 | 0.00137 |
| 7E-06   | 0.00022 | 0.00132 | 0.00052 | 0.00192 | 0.00208 |
| 7.1E-06 | 0.00059 | 0.00087 | -4E-06  | 0.00057 | 0.00083 |
| 7.1E-06 | -0.0001 | 0.00141 | 0.00075 | 0.00091 | 0.00102 |
| 7.1E-06 | 0.00044 | 0.00085 | 0.00055 | 0.00102 | 0.00169 |
| 7.2E-06 | 0.00028 | 0.00106 | 0.00029 | 0.00037 | 0.00135 |
| 7.2E-06 | 0.00068 | 0.0015  | 0.00047 | 0.00105 | 0.00165 |
| 7.2E-06 | 8.5E-05 | 0.00105 | 0.00093 | 0.00099 | 0.00092 |
| 7.3E-06 | 0.00046 | 0.00113 | 0.00011 | 0.00133 | 0.0014  |
| 7.3E-06 | 0.00129 | 0.00201 | 0.00135 | 0.00025 | 0.0019  |
| 7.3E-06 | 0.00079 | 0.00157 | 0.00056 | 0.00069 | 0.00146 |
| 7.4E-06 | -0.0004 | 0.00109 | 0.00038 | 0.00052 | 0.00159 |
| 7.4E-06 | -0.0005 | 0.00104 | 0.0008  | 0.00102 | 0.00138 |
| 7.4E-06 | 1.9E-05 | 0.00122 | 0.00065 | 0.00114 | 0.00205 |
| 7.5E-06 | 0.00062 | 0.00078 | 0.001   | 0.00137 | 0.00088 |

|         |         |         |         |         |         |
|---------|---------|---------|---------|---------|---------|
| 7.5E-06 | 0.00077 | 0.0007  | 0.00048 | 0.00189 | 0.0014  |
| 7.5E-06 | 0.00028 | 0.00018 | 9.7E-05 | 0.0016  | 0.00153 |
| 7.6E-06 | 0.00022 | 0.00158 | -0.0003 | 0.0011  | 0.00211 |
| 7.6E-06 | 9.1E-05 | 0.00131 | 0.00047 | 0.0007  | 0.00162 |
| 7.6E-06 | 0.00015 | 0.00144 | 0.00039 | 0.0016  | 0.00149 |
| 7.6E-06 | 0.00125 | 0.00106 | 0.00056 | 0.00175 | 0.00153 |
| 7.7E-06 | -0.0009 | 0.00096 | 0.0009  | 0.00062 | 0.00134 |
| 7.7E-06 | -0.0004 | 0.00123 | 0.00117 | -8E-05  | 0.00237 |
| 7.7E-06 | 0.00044 | 0.00126 | 0.0004  | 0.00202 | 0.00121 |
| 7.8E-06 | -0.0005 | 0.00156 | 0.00112 | 0.0004  | 0.00176 |
| 7.8E-06 | 0.00037 | 0.00133 | 0.00074 | 0.00144 | 0.00154 |
| 7.8E-06 | 3E-05   | 0.00123 | 0.00104 | 0.0005  | 0.0019  |
| 7.9E-06 | -0.0002 | 0.00175 | 0.00068 | 0.00043 | 0.00163 |
| 7.9E-06 | 0.00011 | 0.00145 | 0.00057 | 0.00132 | 0.00113 |
| 7.9E-06 | -1E-05  | 0.00117 | 0.0002  | 0.00117 | 0.00176 |
| 8E-06   | 0.00013 | 0.00079 | -0.0002 | 0.00138 | 0.00134 |
| 8E-06   | 0.00018 | 0.00132 | 0.00082 | 0.0018  | 0.00101 |
| 8E-06   | -0.0004 | 0.00073 | 0.00056 | 0.00162 | 0.00136 |
| 8.1E-06 | 0.00036 | 0.00067 | 0.00046 | 0.00088 | 0.00145 |
| 8.1E-06 | 0.0005  | 0.00117 | 0.00026 | 0.00096 | 0.00058 |
| 8.1E-06 | -0.0005 | 0.00116 | -4E-05  | 0.00084 | 0.00073 |
| 8.2E-06 | 0.00061 | 0.00119 | 0.00023 | 0.00221 | 0.00111 |
| 8.2E-06 | 0.00066 | 0.00135 | 0.00087 | 0.00039 | 0.00055 |
| 8.2E-06 | 0.00057 | 0.00101 | 0.00029 | 0.00094 | 0.00121 |
| 8.3E-06 | 0.00052 | 0.001   | -9E-05  | 0.00107 | 0.00138 |
| 8.3E-06 | 6.7E-05 | 0.00061 | 0.00028 | 0.00023 | 0.00142 |
| 8.3E-06 | -0.0001 | 0.00151 | 0.00025 | 0.00046 | 0.00162 |
| 8.4E-06 | -0.0004 | 0.00121 | 0.00086 | 0.00167 | 0.00111 |
| 8.4E-06 | -0.0003 | 0.00103 | 0.00038 | 0.00129 | 0.0017  |
| 8.4E-06 | 0.00103 | 0.0015  | 0.00085 | 0.00093 | 0.00113 |
| 8.4E-06 | 0.00035 | 0.00127 | 0.00062 | 0.0006  | 0.0013  |
| 8.5E-06 | 0.00036 | 0.00119 | 0.00034 | 0.0005  | 0.00159 |
| 8.5E-06 | -0.0003 | 0.00061 | 0.00071 | 0.00149 | 0.00097 |
| 8.5E-06 | 9.2E-05 | 0.00122 | 0.0004  | 0.00014 | 0.00101 |
| 8.6E-06 | -0.0004 | 0.00117 | 0.00041 | 0.00052 | 0.0013  |
| 8.6E-06 | 2.2E-05 | 0.00069 | 0.00061 | 0.00025 | 0.00098 |
| 8.6E-06 | -0.0001 | 0.00086 | -0.0005 | 0.0008  | 0.00166 |
| 8.7E-06 | 0.00061 | 0.00085 | 0.00059 | -9E-06  | 0.00183 |
| 8.7E-06 | 0.00033 | 3.8E-05 | 0.00052 | 0.00099 | 0.00075 |
| 8.7E-06 | 0.00018 | 0.00136 | 0.00052 | 0.00027 | 0.00148 |
| 8.8E-06 | 0.00011 | 0.00117 | 0.00038 | 0.00047 | 0.00134 |
| 8.8E-06 | 0.00012 | 0.00121 | 0.00075 | 0.00033 | 0.00136 |
| 8.8E-06 | -0.0001 | 0.00104 | 0.00029 | 0.00029 | 0.00184 |
| 8.9E-06 | -9E-05  | 0.00098 | 0.00024 | 0.00071 | 0.00086 |
| 8.9E-06 | 0.00056 | 0.00086 | -0.0002 | 0.00031 | 0.00067 |
| 8.9E-06 | 0.00092 | 0.00102 | -0.0003 | 0.00099 | 0.00176 |
| 9E-06   | 0.00078 | 0.00096 | -0.0002 | 0.00047 | 0.00118 |
| 9E-06   | 0.00065 | 0.00096 | -0.0007 | 0.00085 | 0.0015  |
| 9E-06   | 0.00065 | 0.00088 | 9.8E-05 | 0.00087 | 0.00189 |
| 9.1E-06 | 0.00048 | 0.00129 | 0.00063 | 0.00102 | 0.00152 |
| 9.1E-06 | 0.00062 | 0.00125 | 0.00054 | -0.0009 | 0.00169 |
| 9.1E-06 | 0.00049 | 0.00104 | 6.1E-05 | 1.4E-05 | 0.00108 |
| 9.2E-06 | -0.0002 | 0.00136 | -0.0002 | -0.0002 | 0.001   |
| 9.2E-06 | -5E-05  | 0.00067 | 2.9E-05 | 0.00014 | 0.00066 |

|         |         |         |         |         |         |
|---------|---------|---------|---------|---------|---------|
| 9.2E-06 | 0.00037 | 0.00084 | 0.00045 | 0.00122 | -0.0001 |
| 9.2E-06 | -0.0004 | 0.00187 | 0.00073 | 0.00022 | 0.0005  |
| 9.3E-06 | -0.0002 | 0.00124 | 0.00039 | 0.00043 | 0.00052 |
| 9.3E-06 | -0.0007 | 0.00117 | 0.00039 | -0.0002 | 0.00133 |
| 9.3E-06 | -0.0005 | 0.00031 | 0.00065 | 0.00155 | 0.0013  |
| 9.4E-06 | 0.0008  | 0.00095 | 0.00032 | 0.0006  | 0.00142 |
| 9.4E-06 | 0.00055 | 0.00058 | 0.00029 | 0.00014 | 0.00154 |
| 9.4E-06 | -0.0003 | 0.00127 | 0.0004  | 0.001   | 0.00144 |
| 9.5E-06 | -0.0004 | 0.00108 | 0.00026 | 3.7E-05 | 0.00022 |
| 9.5E-06 | -8E-05  | 0.00152 | -0.0002 | 0.00013 | 0.00088 |
| 9.5E-06 | -0.0009 | 0.00112 | 0.00073 | 0.00051 | 0.00107 |
| 9.6E-06 | -0.0002 | 0.00101 | 0.00044 | 0.00016 | 0.0015  |
| 9.6E-06 | -0.0002 | 0.00052 | -0.0003 | 0.00044 | 0.00166 |
| 9.6E-06 | -6E-05  | 0.00056 | -0.0003 | 6.2E-05 | 0.00137 |
| 9.7E-06 | -3E-05  | 0.00056 | 0.0006  | 0.00023 | 0.00158 |
| 9.7E-06 | 0.00027 | 0.00079 | 0.00044 | 0.00121 | 0.00224 |
| 9.7E-06 | 0.00029 | 0.00154 | 3.8E-05 | 0.00097 | 0.00106 |
| 9.8E-06 | 9.2E-05 | 0.00058 | 5.5E-05 | 0.00046 | 0.00189 |
| 9.8E-06 | -0.0004 | 0.00094 | 0.00029 | -7E-05  | 0.00156 |
| 9.8E-06 | 0.00016 | 0.00147 | 0.00033 | 0.00081 | 0.00108 |
| 9.9E-06 | -1E-04  | 0.00078 | 0.00021 | 0.00132 | 0.00111 |
| 9.9E-06 | -0.0004 | 0.00048 | 0.00047 | 0.00132 | 0.00108 |
| 9.9E-06 | -0.0002 | 0.00047 | -0.0006 | 0.00126 | 0.00115 |
| 1E-05   | -0.0003 | 0.00058 | 0.00087 | 0.00091 | 0.00098 |
| 1E-05   | -0.0007 | 0.00087 | 0.00012 | 0.00084 | 0.00185 |
| 1E-05   | -0.0004 | 0.001   | -0.0002 | -0.0002 | 6.7E-05 |
| 1E-05   | 0.00013 | 0.00123 | 3.2E-05 | -0.0002 | 0.00131 |
| 1E-05   | -0.0006 | 0.0004  | 0.00057 | 0.00091 | 0.00158 |
| 1E-05   | 4.1E-06 | 0.00092 | 0.00045 | 0.00128 | 0.00164 |
| 1E-05   | -0.0003 | 0.00095 | -0.0001 | 0.00131 | 0.00166 |
| 1E-05   | -0.0003 | 0.00098 | -9E-05  | 0.00108 | 0.00212 |
| 1E-05   | 8.2E-05 | 0.00027 | -0.0006 | 0.00142 | 0.0011  |
| 1E-05   | -1E-05  | 0.00046 | -0.0005 | 0.00137 | 0.00069 |
| 1E-05   | -0.0004 | 0.00156 | 0.00047 | 0.00117 | 0.00133 |
| 1E-05   | -0.0009 | 0.00104 | -6E-05  | 0.00061 | 0.00189 |
| 1E-05   | -0.0001 | 0.00122 | 7.7E-05 | 0.00089 | 0.00151 |
| 1E-05   | -0.0006 | 0.00127 | 0.00013 | 0.00089 | 0.00103 |
| 1E-05   | 0.00054 | 0.00107 | 0.00036 | 0.00165 | 0.00156 |
| 1E-05   | 0.00106 | 0.0009  | 6.3E-05 | 0.00067 | 0.00113 |
| 1E-05   | 8.8E-05 | 0.00103 | -0.0004 | 0.00084 | 0.00062 |
| 1.1E-05 | 4.5E-05 | 0.00103 | -0.0005 | 0.00046 | 0.00164 |
| 1.1E-05 | -4E-06  | 0.00133 | 0.00049 | 0.00078 | 0.00135 |
| 1.1E-05 | -0.0002 | 0.00088 | -0.0001 | -0.0003 | 0.00094 |
| 1.1E-05 | 0.00012 | 0.00122 | 7E-05   | 0.00101 | 0.00136 |
| 1.1E-05 | 1.2E-05 | 0.00113 | 6.2E-05 | 0.00025 | 0.0009  |
| 1.1E-05 | -0.0004 | 0.00087 | 0.00019 | 0.00035 | 0.00082 |
| 1.1E-05 | -0.0004 | 0.00127 | -0.0002 | 0.00031 | 0.00141 |
| 1.1E-05 | -0.0005 | 0.00128 | -0.0005 | 0.00103 | 0.00155 |
| 1.1E-05 | 0.00016 | 0.0014  | -0.0004 | 0.00038 | 0.0013  |
| 1.1E-05 | 0.00021 | 0.00098 | -9E-05  | 0.00116 | 0.00105 |
| 1.1E-05 | -4E-05  | 0.00091 | 0.00093 | 0.00143 | 0.00082 |
| 1.1E-05 | 0.00047 | 0.00088 | 0.00023 | 0.00058 | 0.00059 |
| 1.1E-05 | 0.00042 | 0.00089 | 0.00013 | 0.00117 | 0.0019  |
| 1.1E-05 | 0.00052 | 0.00092 | 0.0009  | 0.00126 | 0.00092 |



|         |         |         |         |         |         |
|---------|---------|---------|---------|---------|---------|
| 1.1E-05 | 3.7E-05 | 0.0007  | 0.00018 | 0.00118 | 0.00226 |
| 1.1E-05 | 0.00047 | 0.00149 | 0.00014 | 0.00055 | 0.00039 |
| 1.1E-05 | 0.00038 | 0.00016 | 1.1E-05 | 0.00102 | 0.0002  |
| 1.1E-05 | 0.00022 | 0.00051 | -0.0005 | 0.00058 | 0.00084 |
| 1.1E-05 | 7.5E-05 | 0.00109 | 9.9E-07 | 0.00042 | 0.00119 |
| 1.1E-05 | -0.0004 | 0.00103 | 0.0008  | 0.00041 | 0.00115 |
| 1.1E-05 | 0.00026 | 0.00079 | -0.0002 | 0.00116 | 0.00117 |
| 1.1E-05 | 0.00015 | 0.00084 | 0.00034 | 0.00084 | 0.00074 |
| 1.1E-05 | 0.0004  | 0.00065 | 0.00022 | 0.0008  | 0.00226 |
| 1.1E-05 | -0.0003 | 0.00114 | 0.00024 | 0.00019 | 0.00132 |
| 1.1E-05 | -7E-05  | 0.00066 | 0.00046 | 0.00144 | 0.00128 |
| 1.1E-05 | -3E-05  | 0.00145 | -0.0002 | 0.00059 | 0.00091 |
| 1.1E-05 | 0.00018 | 0.00108 | 0.00045 | 0.00131 | 0.00101 |
| 1.1E-05 | -0.0003 | 0.00075 | 0.00087 | 0.00155 | 0.00175 |
| 1.1E-05 | 0.00025 | 0.00095 | 0.00047 | 0.00125 | 0.0012  |
| 1.1E-05 | -0.0002 | 0.00121 | 0.00015 | 0.00096 | 0.00153 |
| 1.1E-05 | -2E-05  | 0.00087 | -0.0002 | 0.00043 | 0.00136 |
| 1.1E-05 | -0.0001 | 0.00071 | 0.00095 | 0.00058 | 0.00078 |
| 1.2E-05 | -0.0005 | 0.00124 | 0.00079 | 0.00172 | 0.00108 |
| 1.2E-05 | -0.0002 | 0.00157 | 6.5E-05 | 0.00061 | 0.0013  |
| 1.2E-05 | -0.0001 | 0.00052 | 0.00022 | 0.00102 | 0.00122 |
| 1.2E-05 | -0.0004 | 0.00097 | -8E-05  | 0.0009  | 0.00113 |
| 1.2E-05 | 0.00031 | 0.00128 | 4E-05   | 0.00067 | 0.00142 |
| 1.2E-05 | 0.00013 | 0.00088 | 0.00089 | 0.00011 | 0.00179 |
| 1.2E-05 | -0.0006 | 0.00071 | 0.0003  | 0.00062 | 0.00162 |
| 1.2E-05 | -0.0006 | 0.00142 | -0.0003 | 0.00138 | 0.00075 |
| 1.2E-05 | 2.7E-05 | 0.00092 | -0.0007 | 0.00151 | 0.0007  |
| 1.2E-05 | 0.0003  | 0.0017  | 0.00059 | 0.00159 | 0.00132 |
| 1.2E-05 | -0.0002 | 0.00113 | 0.0002  | 0.00055 | 0.00114 |
| 1.2E-05 | -0.0001 | 0.00105 | 0.00067 | 0.00149 | 0.00143 |
| 1.2E-05 | -6E-05  | 0.00146 | -2E-05  | 0.00149 | 0.00086 |
| 1.2E-05 | 9.7E-05 | 0.00171 | 0.00038 | 0.00014 | 0.00106 |
| 1.2E-05 | 0.00018 | 0.00082 | -0.0006 | 0.00139 | 0.00097 |
| 1.2E-05 | -0.0003 | 0.00106 | 0.00012 | 0.00049 | 0.00113 |
| 1.2E-05 | 0.0001  | 0.00136 | 0.0005  | 0.0012  | 0.00163 |
| 1.2E-05 | -0.0007 | 0.00076 | 0.00115 | 0.00103 | 0.00158 |
| 1.2E-05 | 0.00017 | 0.00166 | 0.00025 | 0.00074 | 0.00096 |
| 1.2E-05 | -0.0002 | 0.00121 | 0.00024 | 0.00085 | 0.00055 |
| 1.2E-05 | -0.0002 | 0.00105 | 0.00016 | 0.00141 | 0.00116 |
| 1.2E-05 | -0.0003 | 0.00068 | 0.00073 | 0.00116 | 0.00206 |
| 1.2E-05 | 0.00055 | 0.00089 | -6E-06  | 0.00106 | 0.00173 |
| 1.2E-05 | 0.00031 | 0.00092 | -0.0002 | 0.00089 | 0.00173 |
| 1.2E-05 | 0.00047 | 0.00143 | -0.0001 | 0.00085 | 0.00078 |
| 1.2E-05 | 0.00023 | 0.00093 | 0.00054 | 0.00148 | 0.00162 |
| 1.2E-05 | -0.0002 | 0.00089 | 0.00072 | 0.00088 | 0.00163 |
| 1.2E-05 | -0.0004 | 0.00058 | 0.00043 | 0.00134 | 0.00108 |
| 1.2E-05 | 0.00023 | 0.00074 | 0.00031 | 0.00063 | 0.00109 |
| 1.2E-05 | 0.00018 | 0.00079 | 3.3E-05 | 0.00016 | 0.00151 |
| 1.2E-05 | 0.00093 | 0.00085 | -0.0008 | 0.00065 | 0.00114 |
| 1.3E-05 | 0.00067 | 0.00134 | 0.00039 | 0.00126 | 0.00077 |
| 1.3E-05 | -0.0003 | 0.00036 | 0.00039 | 0.00104 | 0.00138 |
| 1.3E-05 | 0.00035 | 0.00151 | 0.00025 | 0.00048 | 0.0005  |
| 1.3E-05 | -0.0004 | 0.00086 | 7.4E-05 | 0.00105 | 0.00115 |
| 1.3E-05 | 0.00057 | 0.00055 | -0.0005 | 0.00149 | 0.00166 |

|         |         |         |         |         |         |
|---------|---------|---------|---------|---------|---------|
| 1.3E-05 | -0.0001 | 0.00113 | -0.0002 | 0.00108 | 0.00153 |
| 1.3E-05 | -0.0002 | 0.00093 | 0.00036 | 0.00111 | 0.00088 |
| 1.3E-05 | 0.0007  | 0.00091 | 0.00024 | 0.00097 | 0.00169 |
| 1.3E-05 | 0.00011 | 0.00161 | -0.0003 | 0.00122 | 0.00069 |
| 1.3E-05 | 0.00017 | 0.00108 | -0.0004 | 0.00109 | 0.0016  |
| 1.3E-05 | 0.00044 | 0.00042 | 0.00018 | 0.00047 | 0.0017  |
| 1.3E-05 | -0.0004 | 0.00111 | 0.00076 | 0.00135 | 0.00143 |
| 1.3E-05 | 0.00016 | 0.00152 | 0.00029 | 0.0008  | 0.00122 |
| 1.3E-05 | -0.0003 | 0.00126 | 0.00068 | 0.00012 | 0.00125 |
| 1.3E-05 | 0.00053 | 0.00087 | 0.00038 | 0.00047 | 0.00112 |
| 1.3E-05 | 8.1E-05 | 0.00091 | 0.00054 | 0.00097 | 0.00134 |
| 1.3E-05 | -7E-05  | 0.00096 | -0.0002 | 0.00114 | 0.00056 |
| 1.3E-05 | -7E-05  | 0.00089 | -0.0003 | 0.00105 | 0.00126 |
| 1.3E-05 | -0.0003 | 0.00104 | 0.00055 | 0.00133 | 0.00105 |
| 1.3E-05 | 0.0002  | 0.00141 | 0.0003  | 0.0011  | 0.00252 |
| 1.3E-05 | 0.00014 | 0.00124 | -0.0004 | 0.00105 | 0.00167 |
| 1.3E-05 | 0.00056 | 0.00116 | 0.00013 | 0.00107 | 0.00137 |
| 1.3E-05 | -0.0005 | 0.00119 | 0.00022 | 0.00065 | 0.00113 |
| 1.3E-05 | -6E-05  | 0.00087 | 0.00011 | 3.8E-05 | 0.00095 |
| 1.3E-05 | -0.0003 | 0.00165 | 0.00047 | 0.00108 | 0.00154 |
| 1.3E-05 | 0.00036 | 0.0011  | -0.0003 | 0.00093 | 0.00166 |
| 1.3E-05 | -0.0001 | 0.00126 | -0.0004 | 0.00088 | 0.00106 |
| 1.3E-05 | -0.0001 | 0.00101 | 0.00018 | 0.00095 | 0.00152 |
| 1.3E-05 | 0.00034 | 0.00095 | 0.0005  | 0.00115 | 0.00131 |
| 1.3E-05 | -0.0006 | 0.0012  | -0.0002 | -1E-04  | 0.00086 |
| 1.3E-05 | -0.0006 | 0.00116 | 0.00011 | 0.00058 | 0.00108 |
| 1.4E-05 | -7E-05  | 0.00065 | 0.00045 | 0.00176 | 0.0015  |
| 1.4E-05 | -2E-06  | 0.00134 | 5.3E-05 | 0.00123 | 0.00175 |
| 1.4E-05 | -0.0002 | 0.00118 | -0.0002 | 0.00158 | 0.00189 |
| 1.4E-05 | -0.0001 | 0.00112 | -0.0002 | -3E-05  | 0.00171 |
| 1.4E-05 | 0.00022 | 0.00134 | 1.9E-05 | 0.00021 | 0.00163 |
| 1.4E-05 | 0.00014 | 0.00104 | 0.00023 | 0.00104 | 0.00176 |
| 1.4E-05 | -0.0001 | 0.00142 | 0.00043 | -0.0002 | 0.00087 |
| 1.4E-05 | 0.00122 | 0.00117 | -0.0002 | 0.00083 | 0.00151 |
| 1.4E-05 | 0.00053 | 0.00142 | 0.00015 | 0.00064 | 0.0005  |
| 1.4E-05 | -5E-05  | 0.00113 | -0.0003 | 0.0007  | 0.00162 |
| 1.4E-05 | 0.0003  | 0.00112 | -0.0001 | 0.00124 | 0.00165 |
| 1.4E-05 | -0.0007 | 0.00154 | 5.4E-05 | 0.00169 | 0.00242 |
| 1.4E-05 | 1E-05   | 0.00097 | -0.0004 | 0.00125 | 0.00136 |
| 1.4E-05 | -7E-06  | 0.00092 | 0.00044 | -4E-05  | 0.00143 |
| 1.4E-05 | -0.0004 | 0.00106 | 0.00037 | 0.00039 | 0.00092 |
| 1.4E-05 | -0.0005 | 0.00107 | -0.0009 | 0.00023 | 0.00163 |
| 1.4E-05 | -0.0007 | 0.00089 | 0.00055 | 0.00148 | 0.0012  |
| 1.4E-05 | -0.0005 | 0.0011  | 0.00019 | 0.00079 | 0.00124 |
| 1.4E-05 | -0.0009 | 0.00076 | 0.00055 | 0.0005  | 0.00214 |
| 1.4E-05 | 0.00031 | 0.00126 | 0.00028 | 0.00084 | 0.00181 |
| 1.4E-05 | -0.0007 | 0.00117 | 0.00052 | 0.00042 | 0.00151 |
| 1.4E-05 | -0.0007 | 0.00146 | -3E-05  | 0.00049 | 0.00129 |
| 1.4E-05 | -0.0004 | 0.00076 | 0.00027 | 0.00074 | 0.00211 |
| 1.4E-05 | -0.0006 | 0.00026 | 0.00087 | 0.00118 | 0.00111 |
| 1.4E-05 | -0.0001 | 0.00096 | 0.00043 | 0.0012  | 0.00092 |
| 1.4E-05 | -6E-05  | 0.0012  | 0.00022 | 0.00157 | 0.00157 |
| 1.4E-05 | -0.0002 | 0.00116 | 0.00064 | 0.00084 | 0.00079 |
| 1.4E-05 | -0.0009 | 0.00071 | -0.0003 | 0.00149 | 0.00089 |

|         |         |         |         |         |         |
|---------|---------|---------|---------|---------|---------|
| 1.4E-05 | -0.0005 | 0.00125 | 0.00014 | 0.00152 | 0.00083 |
| 1.4E-05 | -8E-05  | 0.00093 | 0.00064 | -0.0004 | 0.00135 |
| 1.4E-05 | -8E-05  | 0.00149 | -5E-05  | 0.00095 | 0.0016  |
| 1.5E-05 | 0.00057 | 0.00108 | 0.00069 | 0.0011  | 0.00172 |
| 1.5E-05 | 0.00065 | 0.00114 | -0.0005 | 0.00101 | 0.00089 |
| 1.5E-05 | -0.0004 | 0.00076 | 0.00025 | 0.00094 | 0.00183 |
| 1.5E-05 | -0.0005 | 0.00089 | -0.0001 | 0.00107 | 0.00153 |
| 1.5E-05 | -0.0004 | 0.00053 | 0.00057 | 0.00164 | 0.00132 |
| 1.5E-05 | -0.0003 | 0.0002  | -0.0004 | 0.00097 | 0.00117 |
| 1.5E-05 | -0.0011 | 0.00085 | 7.3E-05 | 0.00038 | 0.00152 |
| 1.5E-05 | -0.0005 | 0.00086 | 0.00025 | 0.00102 | 0.00117 |
| 1.5E-05 | -0.0003 | 0.0006  | -0.0003 | 0.00055 | 0.00114 |
| 1.5E-05 | -0.0002 | 0.00059 | -0.0003 | 0.00111 | 0.00163 |
| 1.5E-05 | -0.0004 | 0.00076 | 0.00026 | 0.00122 | 0.0022  |
| 1.5E-05 | -0.0002 | 0.00075 | 0.00037 | 0.00081 | 0.00102 |
| 1.5E-05 | -0.0002 | 0.00145 | 0.00063 | 0.00138 | 0.00187 |
| 1.5E-05 | -0.0002 | 0.00067 | 0.00084 | 0.00059 | 0.00133 |
| 1.5E-05 | 1.1E-05 | 0.00072 | 0.00057 | 0.00132 | 0.00118 |
| 1.5E-05 | -0.0008 | 0.00141 | 0.00064 | 0.00021 | 0.0015  |

**Table SI.12:** Primary kinetic data for the reaction of  $\omega$ -heptalactam (**S12**) with CumO $\bullet$  generated by 355 nm LFP in MeCN (**Figure SI.12**).

| t / s   | $\Delta A$ $\omega$ -heptalactam ( <b>S12</b> ) |              |              |               |               |
|---------|-------------------------------------------------|--------------|--------------|---------------|---------------|
|         | <b>0.270M</b>                                   | <b>0.70M</b> | <b>1.39M</b> | <b>1.925M</b> | <b>2.695M</b> |
| -1E-06  | 0.00041                                         | -0.0006      | -0.0005      | 0.00038       | 0.00075       |
| -1E-06  | -6E-05                                          | -0.0006      | -0.0009      | -0.0002       | 0.00091       |
| -9E-07  | -4E-05                                          | -0.0004      | -0.0012      | -0.0002       | 0.00111       |
| -9E-07  | 0.00085                                         | 0.00052      | -0.0004      | -0.0004       | 0.00126       |
| -9E-07  | 0.00062                                         | -0.0001      | -0.0011      | 7.3E-06       | 0.00109       |
| -8E-07  | 0.00068                                         | -0.0005      | -0.0004      | -0.0001       | 0.00118       |
| -8E-07  | 0.00024                                         | -0.0006      | -0.001       | 0.0006        | 0.00153       |
| -8E-07  | 0.00023                                         | -0.0012      | -0.0019      | -0.0007       | 0.00138       |
| -7E-07  | 0.00055                                         | -0.0013      | -0.0011      | -0.0004       | 0.00099       |
| -7E-07  | 0.00036                                         | -0.0004      | -0.002       | -0.0004       | 0.00219       |
| -7E-07  | -0.0003                                         | -0.0005      | -0.0006      | 0.0002        | 0.00129       |
| -6E-07  | 6.8E-05                                         | -0.0003      | -0.0009      | -0.0003       | 0.00135       |
| -6E-07  | -0.0006                                         | -0.0008      | -0.0018      | 0.0008        | 0.00133       |
| -6E-07  | -5E-05                                          | -0.0011      | -0.0007      | 0.00051       | 0.0014        |
| -5E-07  | -0.0007                                         | -0.0006      | -0.0016      | 0.00048       | 0.00058       |
| -5E-07  | 0.00027                                         | -0.0005      | -0.0013      | 0.00014       | 0.00135       |
| -5E-07  | 8.7E-05                                         | -0.0009      | -0.0011      | 0.00016       | 0.00283       |
| -4E-07  | 0.00014                                         | 0.00039      | -0.0016      | -0.0005       | 0.00159       |
| -4E-07  | -0.001                                          | -0.0009      | -0.0017      | -0.0007       | 0.00049       |
| -4E-07  | -0.0001                                         | -0.0005      | -0.001       | 0.00017       | 0.00126       |
| -4E-07  | -0.0002                                         | -0.0003      | -0.0006      | -0.0003       | 0.00138       |
| -3E-07  | -0.0002                                         | -0.0008      | -0.0009      | -0.0006       | 0.00183       |
| -3E-07  | -0.0002                                         | -0.0001      | -0.0003      | 0.00011       | 0.00141       |
| -3E-07  | 7E-05                                           | -0.0008      | -0.0011      | -0.0002       | 0.00099       |
| -2E-07  | -0.0003                                         | -0.0002      | -0.0013      | -0.0002       | 0.00068       |
| -2E-07  | 0.00033                                         | -5E-05       | -0.0014      | -1E-05        | 0.00111       |
| -2E-07  | 0.00028                                         | -0.0005      | -0.0015      | 0.00012       | 0.00173       |
| -1E-07  | 0.00045                                         | 0.00073      | -0.0019      | -0.0006       | 0.0017        |
| -1E-07  | -1E-05                                          | -8E-05       | -0.0015      | -0.0004       | 0.00062       |
| -6E-08  | -0.0005                                         | -8E-05       | -0.0008      | 0.00082       | 0.00141       |
| -3E-08  | -0.0004                                         | -0.0006      | -0.0021      | 0.00045       | 0.00104       |
| -4E-10  | -0.0034                                         | -0.0042      | -0.0049      | -0.0029       | -0.0023       |
| 3.2E-08 | -0.0071                                         | -0.0143      | -0.0153      | -0.0146       | -0.017        |
| 6.4E-08 | 0.02508                                         | 0.02354      | 0.0189       | 0.01873       | 0.01711       |
| 9.6E-08 | 0.0274                                          | 0.02633      | 0.02412      | 0.0251        | 0.02417       |
| 1.3E-07 | 0.02698                                         | 0.02604      | 0.02336      | 0.02407       | 0.02352       |
| 1.6E-07 | 0.02693                                         | 0.0241       | 0.02203      | 0.02189       | 0.02121       |
| 1.9E-07 | 0.02565                                         | 0.02356      | 0.02058      | 0.02201       | 0.02047       |
| 2.2E-07 | 0.02446                                         | 0.02328      | 0.01859      | 0.01952       | 0.01927       |
| 2.6E-07 | 0.02405                                         | 0.02178      | 0.01847      | 0.01889       | 0.01769       |
| 2.9E-07 | 0.02288                                         | 0.02051      | 0.01715      | 0.01864       | 0.01688       |
| 3.2E-07 | 0.02238                                         | 0.01953      | 0.01618      | 0.01686       | 0.01523       |
| 3.5E-07 | 0.02159                                         | 0.0186       | 0.01517      | 0.01525       | 0.01448       |
| 3.8E-07 | 0.02176                                         | 0.01802      | 0.01493      | 0.01474       | 0.01411       |
| 4.2E-07 | 0.02026                                         | 0.01772      | 0.01402      | 0.0132        | 0.01296       |
| 4.5E-07 | 0.02002                                         | 0.01685      | 0.01383      | 0.01225       | 0.01221       |
| 4.8E-07 | 0.01838                                         | 0.01639      | 0.01163      | 0.01183       | 0.01142       |
| 5.1E-07 | 0.01704                                         | 0.01527      | 0.01175      | 0.011         | 0.01116       |
| 5.4E-07 | 0.01727                                         | 0.0146       | 0.01042      | 0.01069       | 0.01034       |

|         |         |         |         |         |         |
|---------|---------|---------|---------|---------|---------|
| 5.8E-07 | 0.01785 | 0.01349 | 0.01052 | 0.00989 | 0.00997 |
| 6.1E-07 | 0.01677 | 0.01365 | 0.01023 | 0.00965 | 0.00905 |
| 6.4E-07 | 0.01646 | 0.01291 | 0.00988 | 0.00802 | 0.00849 |
| 6.7E-07 | 0.01615 | 0.01219 | 0.0095  | 0.00826 | 0.00794 |
| 7E-07   | 0.01499 | 0.01223 | 0.00883 | 0.00786 | 0.00793 |
| 7.4E-07 | 0.01601 | 0.01109 | 0.00759 | 0.00709 | 0.00737 |
| 7.7E-07 | 0.01474 | 0.01057 | 0.00783 | 0.00667 | 0.00695 |
| 8E-07   | 0.01364 | 0.01098 | 0.00754 | 0.00635 | 0.00584 |
| 8.3E-07 | 0.01314 | 0.01009 | 0.00718 | 0.00567 | 0.00579 |
| 8.6E-07 | 0.01309 | 0.00928 | 0.00661 | 0.00555 | 0.0053  |
| 9E-07   | 0.01271 | 0.0091  | 0.00513 | 0.00473 | 0.00558 |
| 9.3E-07 | 0.013   | 0.00869 | 0.0047  | 0.0047  | 0.0048  |
| 9.6E-07 | 0.01169 | 0.00879 | 0.00495 | 0.00446 | 0.00461 |
| 9.9E-07 | 0.01163 | 0.0085  | 0.00481 | 0.00365 | 0.00425 |
| 1E-06   | 0.01145 | 0.00779 | 0.00448 | 0.00495 | 0.00423 |
| 1.1E-06 | 0.01039 | 0.0076  | 0.00486 | 0.00341 | 0.00403 |
| 1.1E-06 | 0.0115  | 0.00698 | 0.00412 | 0.00353 | 0.00409 |
| 1.1E-06 | 0.01023 | 0.00624 | 0.00389 | 0.00302 | 0.00425 |
| 1.2E-06 | 0.00988 | 0.0066  | 0.0036  | 0.00312 | 0.00429 |
| 1.2E-06 | 0.01    | 0.00646 | 0.00309 | 0.00319 | 0.00409 |
| 1.2E-06 | 0.00975 | 0.00613 | 0.00298 | 0.00296 | 0.00407 |
| 1.2E-06 | 0.00922 | 0.00569 | 0.00232 | 0.00322 | 0.00365 |
| 1.3E-06 | 0.00889 | 0.00614 | 0.00286 | 0.0025  | 0.0035  |
| 1.3E-06 | 0.00877 | 0.00533 | 0.00284 | 0.00272 | 0.00283 |
| 1.3E-06 | 0.00868 | 0.00507 | 0.00247 | 0.00152 | 0.00317 |
| 1.4E-06 | 0.00892 | 0.0054  | 0.00242 | 0.00143 | 0.00338 |
| 1.4E-06 | 0.0077  | 0.00549 | 0.00214 | 0.00214 | 0.00261 |
| 1.4E-06 | 0.00838 | 0.00475 | 0.00134 | 0.0017  | 0.00275 |
| 1.5E-06 | 0.00702 | 0.00453 | 0.00143 | 0.00182 | 0.00323 |
| 1.5E-06 | 0.00817 | 0.00479 | 0.00181 | 0.00253 | 0.00346 |
| 1.5E-06 | 0.0072  | 0.0035  | 0.00168 | 0.00256 | 0.00205 |
| 1.6E-06 | 0.00721 | 0.00421 | 0.00077 | 0.00112 | 0.00267 |
| 1.6E-06 | 0.0075  | 0.0044  | 0.00126 | 0.00171 | 0.00303 |
| 1.6E-06 | 0.00774 | 0.00399 | 0.00161 | 0.00136 | 0.00267 |
| 1.7E-06 | 0.00674 | 0.00347 | 0.00127 | 0.0017  | 0.00321 |
| 1.7E-06 | 0.00649 | 0.00371 | 0.00099 | 0.00132 | 0.00314 |
| 1.7E-06 | 0.0056  | 0.00314 | 0.00128 | 0.00115 | 0.0025  |
| 1.8E-06 | 0.00562 | 0.00267 | 0.00065 | 0.00121 | 0.0028  |
| 1.8E-06 | 0.00631 | 0.00287 | 0.00046 | 0.00119 | 0.00266 |
| 1.8E-06 | 0.00592 | 0.00318 | 0.00097 | 0.00107 | 0.00273 |
| 1.9E-06 | 0.00571 | 0.002   | 0.00084 | 0.00122 | 0.00178 |
| 1.9E-06 | 0.00488 | 0.00264 | 0.0009  | 0.00109 | 0.00211 |
| 1.9E-06 | 0.00498 | 0.00279 | 0.00068 | 0.00122 | 0.00295 |
| 2E-06   | 0.00461 | 0.00175 | 0.00043 | 0.00164 | 0.00226 |
| 2E-06   | 0.00526 | 0.00218 | 0.00048 | 0.00121 | 0.00254 |
| 2E-06   | 0.00507 | 0.00151 | 0.00082 | 0.00089 | 0.00237 |
| 2E-06   | 0.00426 | 0.0019  | 0.00026 | 0.00083 | 0.00102 |
| 2.1E-06 | 0.00466 | 0.0011  | 0.00038 | 0.00059 | 0.00255 |
| 2.1E-06 | 0.00423 | 0.00172 | 3.2E-05 | 0.0005  | 0.00216 |
| 2.1E-06 | 0.00478 | 0.00153 | 0.00084 | 0.00081 | 0.00215 |
| 2.2E-06 | 0.00553 | 0.00186 | 0.00069 | 0.0005  | 0.00154 |
| 2.2E-06 | 0.00411 | 0.00216 | 8.1E-05 | 0.00067 | 0.00231 |
| 2.2E-06 | 0.0049  | 0.00133 | 0.00038 | 0.00089 | 0.0023  |
| 2.3E-06 | 0.00315 | 0.00119 | -8E-05  | 0.00041 | 0.00342 |

|         |         |         |         |         |         |
|---------|---------|---------|---------|---------|---------|
| 2.3E-06 | 0.00349 | 0.00172 | 0.00047 | 0.00015 | 0.00195 |
| 2.3E-06 | 0.00443 | 0.00111 | 0.00016 | 0.00069 | 0.00191 |
| 2.4E-06 | 0.00415 | 0.0015  | 0.00017 | 0.00103 | 0.00177 |
| 2.4E-06 | 0.00376 | 0.0012  | -0.0001 | 0.00067 | 0.00198 |
| 2.4E-06 | 0.0037  | 0.0008  | 0.00033 | 0.00062 | 0.00159 |
| 2.5E-06 | 0.00388 | 0.00066 | -0.0002 | 0.00067 | 0.00215 |
| 2.5E-06 | 0.00312 | 0.00033 | -0.0003 | 0.00028 | 0.00272 |
| 2.5E-06 | 0.00356 | 0.00103 | -0.0011 | 0.00054 | 0.00172 |
| 2.6E-06 | 0.00331 | 0.00071 | -0.0002 | 0.00109 | 0.00274 |
| 2.6E-06 | 0.00307 | 0.00169 | -9E-05  | 5.9E-05 | 0.00242 |
| 2.6E-06 | 0.00224 | 0.0014  | -0.0005 | 0.00035 | 0.00209 |
| 2.7E-06 | 0.00306 | 0.00097 | -0.0009 | 0.00042 | 0.00245 |
| 2.7E-06 | 0.00302 | 0.00076 | -0.0004 | 0.00064 | 0.00201 |
| 2.7E-06 | 0.00349 | 0.00101 | -0.0006 | 0.00065 | 0.00266 |
| 2.8E-06 | 0.00285 | 0.0009  | -0.001  | 0.00061 | 0.00224 |
| 2.8E-06 | 0.00298 | 0.00135 | -0.0002 | 0.00085 | 0.00157 |
| 2.8E-06 | 0.00268 | 0.00115 | -0.0008 | -0.0001 | 0.00133 |
| 2.8E-06 | 0.00188 | 0.00017 | -0.0006 | -0.0002 | 0.00062 |
| 2.9E-06 | 0.00254 | 0.00102 | -7E-05  | 0.00051 | 0.00161 |
| 2.9E-06 | 0.00321 | 0.00069 | -0.0003 | 0.0003  | 0.00251 |
| 2.9E-06 | 0.00279 | 0.00059 | 0.00012 | -0.0002 | 0.00256 |
| 3E-06   | 0.00222 | 0.00027 | -0.0013 | 0.00047 | 0.00205 |
| 3E-06   | 0.00207 | 0.0008  | -0.0017 | 5.9E-05 | 0.00231 |
| 3E-06   | 0.00249 | 0.00093 | -0.0003 | 0.00079 | 0.00243 |
| 3.1E-06 | 0.00138 | 0.00098 | -0.0006 | 0.0003  | 0.00142 |
| 3.1E-06 | 0.00141 | 0.00037 | -0.0006 | 0.00031 | 0.00264 |
| 3.1E-06 | 0.00251 | 0.00107 | -0.0009 | 0.00087 | 0.00232 |
| 3.2E-06 | 0.00243 | 0.00026 | -0.0013 | 0.0004  | 0.00221 |
| 3.2E-06 | 0.00179 | 0.0008  | -0.0008 | 0.00022 | 0.00177 |
| 3.2E-06 | 0.00168 | 0.00057 | -0.001  | 0.00098 | 0.00249 |
| 3.3E-06 | 0.00283 | 0.00146 | -0.0011 | 0.00029 | 0.00231 |
| 3.3E-06 | 0.00165 | 0.0004  | -0.0007 | 0.00057 | 0.00235 |
| 3.3E-06 | 0.0015  | -0.0004 | -0.0003 | 0.00109 | 0.00275 |
| 3.4E-06 | 0.00158 | 0.00044 | -0.0009 | 0.00035 | 0.00204 |
| 3.4E-06 | 0.00199 | 0.00046 | -0.0013 | 0.00038 | 0.00128 |
| 3.4E-06 | 0.00132 | 1.9E-05 | -0.0015 | 0.00064 | 0.00145 |
| 3.5E-06 | 0.00114 | 0.00051 | -0.0012 | 0.00019 | 0.00138 |
| 3.5E-06 | 0.00089 | -4E-05  | -0.0015 | 0.00027 | 0.00262 |
| 3.5E-06 | 0.00148 | 5.2E-05 | -0.0014 | 0.00022 | 0.00298 |
| 3.6E-06 | 0.00082 | 8.9E-06 | -0.0005 | 0.00031 | 0.00223 |
| 3.6E-06 | 0.00161 | 0.00027 | -0.0015 | 0.00109 | 0.00218 |
| 3.6E-06 | 0.00162 | 0.00019 | -0.0009 | 0.00042 | 0.00183 |
| 3.6E-06 | 0.00111 | 0.00042 | -0.0011 | 0.00051 | 0.00239 |
| 3.7E-06 | 0.00198 | 0.00011 | -0.0012 | 0.00086 | 0.00195 |
| 3.7E-06 | 0.00174 | 0.00034 | -0.0014 | 0.00064 | 0.00185 |
| 3.7E-06 | 0.001   | -0.0007 | -0.0011 | 0.00036 | 0.0016  |
| 3.8E-06 | 0.00186 | 0.00091 | -0.0009 | 0.00011 | 0.00184 |
| 3.8E-06 | 0.00113 | -1E-05  | -0.0008 | 0.00058 | 0.00215 |
| 3.8E-06 | 0.00121 | -1E-06  | 3.9E-05 | 0.00134 | 0.00273 |
| 3.9E-06 | 0.00185 | 0.00046 | -0.0008 | 0.0003  | 0.00273 |
| 3.9E-06 | 0.00115 | -0.0008 | -0.0011 | 0.00083 | 0.00187 |
| 3.9E-06 | 0.00073 | 0.00103 | -8E-05  | 0.00074 | 0.00133 |
| 4E-06   | 0.00189 | 9.9E-05 | -0.0016 | -0.0001 | 0.00182 |
| 4E-06   | 0.00101 | -1E-04  | -0.0014 | 1.6E-05 | 0.0022  |

|         |         |         |         |         |         |
|---------|---------|---------|---------|---------|---------|
| 4E-06   | 0.00104 | 0.00048 | -0.001  | -0.0001 | 0.0015  |
| 4.1E-06 | 0.001   | 7.9E-05 | -0.0015 | -1E-04  | 0.00193 |
| 4.1E-06 | 0.00045 | 7.8E-05 | -0.0016 | 0.00033 | 0.00186 |
| 4.1E-06 | 0.00096 | 2E-05   | -0.0011 | 0.00041 | 0.00223 |
| 4.2E-06 | 0.00124 | -0.0002 | -0.0013 | 0.0008  | 0.00137 |
| 4.2E-06 | 0.00093 | 0.00051 | -0.0007 | 0.00081 | 0.00202 |
| 4.2E-06 | 0.00139 | 0.0008  | -0.0008 | 0.00023 | 0.00223 |
| 4.3E-06 | 0.00073 | -0.0003 | -0.0009 | 0.0009  | 0.00095 |
| 4.3E-06 | 0.00047 | 0.00037 | -0.001  | 0.00018 | 0.0018  |
| 4.3E-06 | 0.00091 | 0.00041 | -0.0009 | 0.00062 | 0.00299 |
| 4.4E-06 | 0.001   | -0.0009 | -0.0021 | 0.00031 | 0.00224 |
| 4.4E-06 | 0.00107 | -0.0001 | -0.0012 | -0.0002 | 0.00219 |
| 4.4E-06 | 0.00111 | -0.0005 | -0.0006 | 0.00097 | 0.00278 |
| 4.4E-06 | 0.00152 | -0.0006 | -0.0003 | 0.00075 | 0.00166 |
| 4.5E-06 | 0.00093 | 0.00017 | -0.0016 | 0.00065 | 0.00178 |
| 4.5E-06 | 0.00118 | -0.0003 | -0.0007 | 0.00121 | 0.00182 |
| 4.5E-06 | 0.00061 | -0.0002 | -0.0011 | 0.00058 | 0.00248 |
| 4.6E-06 | 0.00065 | -0.0005 | -0.0019 | 0.00014 | 0.00218 |
| 4.6E-06 | 0.0011  | -0.0012 | -0.0014 | 0.00084 | 0.00211 |
| 4.6E-06 | 0.00083 | -0.0008 | -0.0013 | 0.00076 | 0.00304 |
| 4.7E-06 | 0.00087 | 0.00029 | -0.0012 | 0.00029 | 0.00163 |
| 4.7E-06 | 0.00133 | 1.4E-05 | -0.0018 | -0.0001 | 0.00124 |
| 4.7E-06 | 0.0006  | -0.0007 | -0.001  | 0.00024 | 0.00145 |
| 4.8E-06 | 0.00127 | 0.00064 | -0.0014 | 0.0003  | 0.00203 |
| 4.8E-06 | 0.00064 | -3E-05  | -0.0017 | 0.00042 | 0.00161 |
| 4.8E-06 | 0.00023 | 0.00019 | -0.0011 | 0.00026 | 0.0017  |
| 4.9E-06 | 0.00069 | -0.0006 | -0.0002 | 0.00052 | 0.00147 |
| 4.9E-06 | 0.00066 | -0.0004 | -0.0015 | 0.00116 | 0.00248 |
| 4.9E-06 | 0.0005  | 0.00031 | -0.0008 | 5.9E-05 | 0.00229 |
| 5E-06   | 0.0006  | 5.8E-05 | -4E-05  | 0.00013 | 0.00216 |
| 5E-06   | 0.0002  | -0.0005 | -0.0004 | 0.00043 | 0.00261 |
| 5E-06   | 0.00043 | -0.0009 | -0.0008 | 3.6E-05 | 0.00203 |
| 5.1E-06 | 0.00034 | 0.00028 | -0.0006 | 0.00024 | 0.00206 |
| 5.1E-06 | 0.00062 | -0.0003 | -0.0009 | -0.0002 | 0.00201 |
| 5.1E-06 | 0.00076 | -0.0003 | -0.0013 | -3E-05  | 0.00298 |
| 5.2E-06 | 0.00012 | 0.00049 | -0.0009 | -2E-05  | 0.00252 |
| 5.2E-06 | 0.0012  | -0.0001 | -0.0012 | -0.0003 | 0.00191 |
| 5.2E-06 | 0.00053 | -0.0007 | -0.0009 | -0.0004 | 0.00234 |
| 5.2E-06 | 0.00058 | -0.0003 | -0.0017 | -5E-05  | 0.00208 |
| 5.3E-06 | 0.00073 | -0.0011 | -0.0008 | 0.00053 | 0.00271 |
| 5.3E-06 | 0.00079 | -0.0009 | -0.0009 | 0.00015 | 0.00264 |
| 5.3E-06 | 0.00045 | -0.0011 | -0.0006 | -5E-05  | 0.0022  |
| 5.4E-06 | 0.00051 | -0.0011 | -0.0006 | 0.0006  | 0.00188 |
| 5.4E-06 | 0.00013 | -0.0008 | -0.0009 | -0.0004 | 0.00339 |
| 5.4E-06 | 0.0004  | -0.0002 | -0.0015 | 0.00053 | 0.00175 |
| 5.5E-06 | 0.00064 | -0.0006 | -0.0008 | 0.00013 | 0.00176 |
| 5.5E-06 | 0.00065 | 0.00038 | -0.0007 | 0.00018 | 0.00235 |
| 5.5E-06 | 0.00097 | -0.0007 | -0.0005 | 0.00026 | 0.00244 |
| 5.6E-06 | 0.00053 | -0.0003 | -0.0013 | -1E-05  | 0.00173 |
| 5.6E-06 | 0.00044 | -0.0008 | -0.0004 | 0.00056 | 0.00282 |
| 5.6E-06 | 0.00061 | -0.0004 | -0.001  | 0.00048 | 0.00222 |
| 5.7E-06 | 0.00013 | -0.0002 | -0.001  | -0.0002 | 0.00249 |
| 5.7E-06 | 0.00037 | 0.00025 | -0.0006 | 6.2E-05 | 0.00203 |
| 5.7E-06 | -0.0003 | -0.0006 | -0.0011 | -7E-05  | 0.00244 |

|         |         |         |         |         |         |
|---------|---------|---------|---------|---------|---------|
| 5.8E-06 | 0.00072 | -0.0005 | -0.0012 | 4.1E-05 | 0.00286 |
| 5.8E-06 | 0.00056 | -0.0003 | -0.0011 | 0.00101 | 0.00214 |
| 5.8E-06 | 0.00045 | -0.0009 | -7E-05  | 0.00063 | 0.00267 |
| 5.9E-06 | 0.00019 | 0.00023 | -0.0009 | 0.0006  | 0.00233 |
| 5.9E-06 | 0.00065 | -0.0005 | -0.0012 | 0.00023 | 0.00113 |
| 5.9E-06 | 0.00055 | 0.00023 | -0.001  | 0.00061 | 0.00181 |
| 6E-06   | 0.00064 | -0.0005 | -0.0005 | 0.00062 | 0.00192 |
| 6E-06   | 0.00022 | -0.0008 | -0.0011 | 0.00087 | 0.00266 |
| 6E-06   | 7E-05   | -0.0001 | -0.0007 | 0.00055 | 0.00176 |
| 6E-06   | 0.00038 | -0.0002 | -0.0013 | 0.0004  | 0.00189 |
| 6.1E-06 | 0.00021 | -0.0004 | -0.0014 | 0.00073 | 0.00247 |
| 6.1E-06 | 6.6E-05 | -0.0003 | -0.0005 | 0.0011  | 0.00245 |
| 6.1E-06 | 0.0015  | 0.00064 | -0.0015 | 0.00059 | 0.0028  |
| 6.2E-06 | 0.0004  | 0.00035 | -0.001  | 0.00062 | 0.00217 |
| 6.2E-06 | 1.1E-05 | -0.0003 | -0.0011 | 0.00129 | 0.00339 |
| 6.2E-06 | -0.0001 | -7E-05  | -0.0017 | 0.00064 | 0.00211 |
| 6.3E-06 | 0.00114 | -0.0002 | -0.0013 | 0.00061 | 0.00149 |
| 6.3E-06 | 0.00057 | -0.0009 | -0.0007 | -5E-05  | 0.00138 |
| 6.3E-06 | 0.00099 | -0.0003 | -0.0015 | 0.00022 | 0.00261 |
| 6.4E-06 | -0.0003 | -0.0008 | -0.0011 | 0.00032 | 0.00257 |
| 6.4E-06 | 0.0005  | -4E-06  | -0.001  | 0.00039 | 0.00235 |
| 6.4E-06 | -0.0002 | -0.0006 | -0.001  | 0.00018 | 0.00269 |
| 6.5E-06 | 0.00049 | 0.00014 | -0.0015 | 0.00027 | 0.002   |
| 6.5E-06 | 0.00021 | -0.0004 | -0.0002 | -0.0002 | 0.00231 |
| 6.5E-06 | -6E-06  | -0.0006 | -0.0006 | -1E-05  | 0.00198 |
| 6.6E-06 | 0.00079 | -0.0006 | -0.0007 | -4E-05  | 0.00163 |
| 6.6E-06 | 0.0004  | -0.0008 | -0.0004 | 0.00093 | 0.00118 |
| 6.6E-06 | -3E-05  | -0.0004 | -0.001  | 0.00114 | 0.00254 |
| 6.7E-06 | 0.00048 | -0.0003 | -0.0005 | 0.00048 | 0.00257 |
| 6.7E-06 | 0.00038 | -0.001  | -0.0007 | 0.00093 | 0.00187 |
| 6.7E-06 | 0.00057 | -0.0012 | -0.001  | -2E-05  | 0.00233 |
| 6.8E-06 | 0.00048 | -7E-05  | -0.0014 | 0.00059 | 0.00191 |
| 6.8E-06 | 0.00081 | 0.00021 | -0.0014 | 0.00069 | 0.00191 |
| 6.8E-06 | -4E-05  | -0.0003 | -0.0013 | 0.00014 | 0.00255 |
| 6.8E-06 | -0.0003 | -0.0008 | -0.0008 | 0.00061 | 0.00158 |
| 6.9E-06 | 0.00028 | -0.0006 | -0.0014 | 6.6E-05 | 0.00157 |
| 6.9E-06 | 0.00039 | -0.001  | -0.0008 | 0.00056 | 0.00244 |
| 6.9E-06 | 0.00023 | -0.0004 | -0.0013 | -0.0005 | 0.0021  |
| 7E-06   | -4E-05  | -0.0004 | -0.0008 | 0.00056 | 0.00237 |
| 7E-06   | 0.00048 | -0.0012 | -0.0014 | 0.00083 | 0.00201 |
| 7E-06   | -0.0004 | -0.0002 | -0.0012 | 0.00063 | 0.00202 |
| 7.1E-06 | 0.0003  | -0.0009 | -0.0016 | 0.00027 | 0.00238 |
| 7.1E-06 | 3.5E-05 | -0.0001 | -0.0014 | 0.00052 | 0.00263 |
| 7.1E-06 | 0.00058 | -0.0002 | -0.0009 | 0.0004  | 0.00201 |
| 7.2E-06 | 6.2E-05 | -0.0007 | -0.0008 | 0.00038 | 0.00191 |
| 7.2E-06 | -0.0004 | -0.0008 | -0.0001 | 0.00032 | 0.00189 |
| 7.2E-06 | 0.0004  | -0.0008 | -0.0002 | 0.00029 | 0.00204 |
| 7.3E-06 | -0.0003 | -0.0007 | -0.0012 | 0.00012 | 0.00259 |
| 7.3E-06 | 0.00024 | -0.0009 | -0.0003 | 0.001   | 0.00257 |
| 7.3E-06 | -0.0007 | -5E-05  | -0.0013 | 0.00144 | 0.00194 |
| 7.4E-06 | 2.6E-05 | -0.0008 | -0.0014 | 0.00076 | 0.00269 |
| 7.4E-06 | 0.00089 | -1E-04  | -0.0009 | 0.00067 | 0.00212 |
| 7.4E-06 | -0.0003 | -0.0008 | -0.0015 | 0.00015 | 0.00255 |
| 7.5E-06 | -0.0007 | -0.0003 | -0.0012 | 0.00037 | 0.00264 |



|         |         |         |         |         |         |
|---------|---------|---------|---------|---------|---------|
| 7.5E-06 | -0.0006 | -0.0004 | -0.0012 | 0.00072 | 0.00235 |
| 7.5E-06 | 0.00032 | -0.0008 | -0.001  | 0.00011 | 0.00207 |
| 7.6E-06 | -0.0004 | 0.00059 | -0.0008 | 0.00068 | 0.00151 |
| 7.6E-06 | -1E-04  | -0.0005 | -0.0013 | 0.00037 | 0.00234 |
| 7.6E-06 | -0.0002 | -0.0014 | -0.0008 | -0.0002 | 0.00265 |
| 7.6E-06 | 8.4E-05 | -0.0013 | -0.0007 | -0.0001 | 0.00263 |
| 7.7E-06 | -6E-05  | -0.0008 | -0.0017 | -4E-05  | 0.00171 |
| 7.7E-06 | 0.00069 | -0.0002 | -0.0008 | 0.00046 | 0.00214 |
| 7.7E-06 | -0.0003 | -0.0006 | -0.0011 | 0.00065 | 0.00169 |
| 7.8E-06 | 0.00027 | -0.0012 | -0.001  | 0.00041 | 0.00171 |
| 7.8E-06 | 5.6E-07 | -0.0004 | -0.0017 | 0.00027 | 0.00209 |
| 7.8E-06 | 0.00043 | -0.0006 | -0.0004 | 0.00118 | 0.00192 |
| 7.9E-06 | 0.00048 | -0.0016 | -0.0015 | 0.00057 | 0.00247 |
| 7.9E-06 | -0.0006 | -0.001  | -0.0015 | -0.0002 | 0.0018  |
| 7.9E-06 | -0.0003 | -0.0006 | -0.0003 | -0.0001 | 0.00213 |
| 8E-06   | 0.0004  | -0.0006 | -0.0009 | 0.0007  | 0.00293 |
| 8E-06   | 0.00085 | -0.0005 | -0.0008 | 0.0003  | 0.0012  |
| 8E-06   | 5.6E-06 | -0.0009 | -0.0013 | 1.3E-05 | 0.00263 |
| 8.1E-06 | 0.00057 | -0.0007 | -0.0004 | 0.00044 | 0.00297 |
| 8.1E-06 | -3E-05  | -0.0008 | -0.0015 | 0.00016 | 0.00252 |
| 8.1E-06 | 0.00012 | -0.0009 | -0.0022 | 5.5E-05 | 0.00166 |
| 8.2E-06 | 0.00014 | -0.0008 | -0.0021 | 0.00048 | 0.00214 |
| 8.2E-06 | 2.8E-05 | -0.0009 | -0.0013 | 8.4E-05 | 0.00124 |
| 8.2E-06 | 0.00018 | -0.0011 | -0.0007 | 0.00082 | 0.00199 |
| 8.3E-06 | 0.00016 | -0.0004 | -0.0021 | 3E-05   | 0.00231 |
| 8.3E-06 | -0.0002 | -0.0008 | -0.0013 | -0.0004 | 0.00181 |
| 8.3E-06 | 0.00026 | -0.0009 | -0.0007 | 0.00015 | 0.00228 |
| 8.4E-06 | -0.0002 | -0.0008 | -0.0016 | 0.00037 | 0.00269 |
| 8.4E-06 | 0.00046 | -0.0004 | -0.001  | -0.0007 | 0.00233 |
| 8.4E-06 | -2E-06  | -0.0009 | -0.0002 | 8.4E-05 | 0.00241 |
| 8.4E-06 | 0.00065 | -0.0003 | -0.0013 | 0.00051 | 0.00186 |
| 8.5E-06 | -0.0003 | -0.0009 | -0.0014 | 0.00066 | 0.00147 |
| 8.5E-06 | -7E-05  | -0.0011 | -0.0009 | 0.00043 | 0.00249 |
| 8.5E-06 | 1.2E-05 | -0.0012 | -0.0015 | 0.00073 | 0.0031  |
| 8.6E-06 | 9.4E-05 | -0.0005 | -0.0012 | 0.00032 | 0.00317 |
| 8.6E-06 | 1.8E-05 | -0.0008 | -0.0009 | 0.00055 | 0.00259 |
| 8.6E-06 | -0.0004 | -0.0006 | -0.0017 | -0.0001 | 0.00255 |
| 8.7E-06 | -2E-05  | -0.0009 | -5E-05  | 0.00078 | 0.00174 |
| 8.7E-06 | -0.0011 | -0.0007 | -0.002  | 0.00063 | 0.00234 |
| 8.7E-06 | -0.0005 | -0.001  | -0.0015 | 0.00036 | 0.0025  |
| 8.8E-06 | 0.00059 | -0.0008 | -0.0018 | 0.00065 | 0.00289 |
| 8.8E-06 | -0.0002 | -0.0011 | -0.0005 | -0.0001 | 0.00219 |
| 8.8E-06 | -0.0004 | -0.0008 | -0.0018 | 0.00081 | 0.00235 |
| 8.9E-06 | -3E-05  | -0.0004 | -0.0008 | 0.00065 | 0.00108 |
| 8.9E-06 | -0.0002 | -0.0008 | -0.0015 | 7.8E-05 | 0.00193 |
| 8.9E-06 | 3.2E-05 | -0.0007 | -0.0009 | 0.00067 | 0.0022  |
| 9E-06   | -3E-05  | -0.001  | -0.0018 | -0.0001 | 0.0022  |
| 9E-06   | 0.00045 | -0.0007 | -0.0017 | 0.00018 | 0.00192 |
| 9E-06   | -0.0005 | -0.0008 | -0.0017 | 0.00083 | 0.00124 |
| 9.1E-06 | 0.00025 | 0.00015 | -0.0019 | 0.00025 | 0.00191 |
| 9.1E-06 | 0.00021 | -0.0005 | -0.0017 | 0.00054 | 0.00208 |
| 9.1E-06 | -8E-05  | -0.0003 | -0.0015 | 0.00101 | 0.0023  |
| 9.2E-06 | 7.2E-06 | -0.0012 | -0.0014 | 0.00015 | 0.00202 |
| 9.2E-06 | 0.00056 | -0.0003 | -0.001  | 0.00039 | 0.0029  |

|         |         |         |         |         |         |
|---------|---------|---------|---------|---------|---------|
| 9.2E-06 | 0.00084 | -0.0014 | -0.0019 | 0.00026 | 0.00308 |
| 9.2E-06 | 3.3E-05 | -0.0007 | -0.0015 | -2E-05  | 0.00241 |
| 9.3E-06 | 4.2E-05 | -0.0006 | -0.0014 | 0.0011  | 0.00287 |
| 9.3E-06 | 0.0002  | -0.0014 | -0.0007 | 2.1E-05 | 0.00193 |
| 9.3E-06 | -0.0006 | -0.0006 | -0.0013 | 0.0005  | 0.00228 |
| 9.4E-06 | -0.0008 | -0.0003 | -0.0017 | 9.7E-05 | 0.00306 |
| 9.4E-06 | -0.0004 | -0.0002 | -0.0013 | 0.00104 | 0.00163 |
| 9.4E-06 | 6.4E-05 | -0.0001 | -0.0011 | 0.00152 | 0.0016  |
| 9.5E-06 | 0.00047 | -5E-05  | -0.0016 | 0.0006  | 0.00178 |
| 9.5E-06 | -0.0005 | 0.00022 | -0.0002 | 0.00011 | 0.00175 |
| 9.5E-06 | -2E-05  | -0.001  | -0.0008 | 0.00051 | 0.00208 |
| 9.6E-06 | -4E-05  | -0.0007 | -0.0007 | 0.00044 | 0.00152 |
| 9.6E-06 | -0.0004 | -0.0009 | -0.0005 | 0.00046 | 0.0017  |
| 9.6E-06 | -0.0005 | -0.0005 | -0.0016 | 0.00029 | 0.0017  |
| 9.7E-06 | 0.00031 | -0.0011 | -0.0009 | -7E-05  | 0.00229 |
| 9.7E-06 | -0.0007 | -0.0008 | -0.0012 | 0.0001  | 0.00229 |
| 9.7E-06 | -9E-05  | -0.0009 | -0.001  | 0.00048 | 0.0024  |
| 9.8E-06 | 0.00017 | -0.0003 | -0.001  | 0.00043 | 0.00224 |
| 9.8E-06 | 0.00044 | -0.0011 | -0.0016 | 0.00076 | 0.00161 |
| 9.8E-06 | -7E-05  | -0.001  | -0.0014 | 0.00062 | 0.00214 |
| 9.9E-06 | -0.0008 | 0.00024 | -0.0009 | 0.00081 | 0.00234 |
| 9.9E-06 | -0.0008 | -0.0009 | -0.0011 | 0.00074 | 0.00101 |
| 9.9E-06 | -0.0002 | -0.0006 | -0.0013 | 0.00037 | 0.00237 |
| 1E-05   | 0.00035 | -0.0014 | -0.0016 | 0.00057 | 0.00208 |
| 1E-05   | -3E-05  | -0.0008 | -0.0015 | 0.0011  | 0.00214 |
| 1E-05   | -0.0003 | 0.00018 | -0.0016 | 0.00061 | 0.00187 |
| 1E-05   | -0.0002 | -0.001  | -0.0003 | 0.00079 | 0.00162 |
| 1E-05   | 0.00031 | 0.00019 | -0.0012 | 0.00051 | 0.00149 |
| 1E-05   | 0.00047 | -0.0001 | -0.0004 | 0.00065 | 0.00214 |
| 1E-05   | 0.00014 | -0.002  | -0.0016 | 4.7E-05 | 0.00172 |
| 1E-05   | 0.0003  | -0.0014 | -0.0015 | 0.00029 | 0.00172 |
| 1E-05   | -0.0007 | -0.0004 | -0.001  | 0.00088 | 0.00219 |
| 1E-05   | -0.0001 | -0.0004 | -0.001  | -0.0003 | 0.00105 |
| 1E-05   | 0.00021 | 0.00021 | -0.0012 | 0.001   | 0.00201 |
| 1E-05   | 2.7E-05 | -0.0002 | -0.0013 | 0.0006  | 0.00231 |
| 1E-05   | -0.0002 | -0.0013 | -0.0018 | 0.00033 | 0.00178 |
| 1E-05   | 0.00014 | -0.0004 | -0.0006 | 0.00064 | 0.00138 |
| 1E-05   | -7E-05  | -0.0007 | -0.0013 | 0.00051 | 0.00245 |
| 1E-05   | 0.00053 | -0.0013 | -0.0007 | 0.00018 | 0.00209 |
| 1E-05   | -0.0002 | -7E-05  | -0.0017 | 0.00054 | 0.00278 |
| 1.1E-05 | -0.0002 | -0.0005 | -0.0015 | 0.00031 | 0.00249 |
| 1.1E-05 | -0.0002 | -0.0003 | -0.0014 | 0.00043 | 0.00213 |
| 1.1E-05 | 0.00011 | 0.00056 | -0.001  | 0.00057 | 0.00227 |
| 1.1E-05 | -1E-04  | -0.0004 | -0.0011 | 0.0009  | 0.00232 |
| 1.1E-05 | 0.0002  | -0.0018 | -0.0005 | 0.00095 | 0.00249 |
| 1.1E-05 | -0.0005 | 0.0002  | -0.0017 | 0.00059 | 0.00218 |
| 1.1E-05 | 0.00044 | -0.0005 | -0.0015 | 0.00042 | 0.00189 |
| 1.1E-05 | 0.00042 | -0.0015 | -0.001  | 0.00068 | 0.00232 |
| 1.1E-05 | -0.0008 | -0.0005 | -0.0019 | 0.00058 | 0.0025  |
| 1.1E-05 | -0.0009 | -0.0004 | -0.0017 | 0.00031 | 0.0027  |
| 1.1E-05 | 9E-05   | -0.0004 | -0.0011 | -0.0001 | 0.00304 |
| 1.1E-05 | 0.00071 | -0.0007 | -0.0015 | 0.0009  | 0.00214 |
| 1.1E-05 | -0.0005 | -0.0003 | -0.0012 | 0.00075 | 0.00231 |
| 1.1E-05 | 0.00032 | -0.0005 | -0.0013 | 0.00045 | 0.00206 |

|         |         |         |         |         |         |
|---------|---------|---------|---------|---------|---------|
| 1.1E-05 | -0.0003 | -0.001  | -0.0006 | 0.00075 | 0.00172 |
| 1.1E-05 | 0.00047 | -0.0007 | -0.0008 | 0.00069 | 0.00242 |
| 1.1E-05 | 8.7E-06 | 3.2E-05 | -0.0009 | 0.00042 | 0.00254 |
| 1.1E-05 | 0.00027 | -0.0002 | -0.0009 | 8.1E-05 | 0.0021  |
| 1.1E-05 | 0.00052 | -0.0012 | -0.0022 | 0.00101 | 0.00276 |
| 1.1E-05 | -0.0004 | -0.0004 | -0.001  | 0.00011 | 0.00192 |
| 1.1E-05 | -0.0003 | 0.00048 | -0.0014 | -9E-05  | 0.00197 |
| 1.1E-05 | -0.0003 | -0.0009 | -0.0016 | -0.0001 | 0.00198 |
| 1.1E-05 | 0.00072 | -0.0004 | -0.0009 | 0.00045 | 0.00227 |
| 1.1E-05 | -0.0006 | -0.0002 | -0.0015 | 0.00097 | 0.00212 |
| 1.1E-05 | -7E-05  | -0.0008 | -0.0018 | 0.0007  | 0.00215 |
| 1.1E-05 | -0.0007 | -0.0011 | -0.0019 | 0.00039 | 0.00253 |
| 1.1E-05 | -0.0005 | -0.0014 | -0.0016 | 0.00014 | 0.00194 |
| 1.1E-05 | 1.2E-05 | -8E-05  | -0.001  | 0.00039 | 0.00218 |
| 1.1E-05 | 0.0002  | -0.0004 | -0.0011 | 0.00118 | 0.00163 |
| 1.1E-05 | -4E-06  | 0.00013 | -0.0015 | 0.00063 | 0.00209 |
| 1.1E-05 | 0.00028 | -0.0008 | -0.0016 | 0.00079 | 0.00182 |
| 1.1E-05 | 0.00034 | -0.0006 | -0.0012 | 0.00026 | 0.00144 |
| 1.2E-05 | 0.00023 | -0.0009 | -0.0014 | 0.00074 | 0.00236 |
| 1.2E-05 | 2.3E-05 | -0.0016 | -0.0019 | 0.00027 | 0.00154 |
| 1.2E-05 | -0.0005 | -0.0007 | -0.0006 | 0.0005  | 0.00306 |
| 1.2E-05 | -0.0002 | -0.0008 | -0.0015 | 0.00132 | 0.00173 |
| 1.2E-05 | -0.0002 | -0.001  | -0.0018 | 0.00084 | 0.0021  |
| 1.2E-05 | 2E-05   | -5E-05  | -0.0015 | -0.0002 | 0.00281 |
| 1.2E-05 | -0.0006 | -0.001  | -0.0008 | -1E-05  | 0.00316 |
| 1.2E-05 | 2.4E-06 | -0.0013 | -0.0012 | 0.00031 | 0.00249 |
| 1.2E-05 | -0.0005 | 4E-05   | -0.0012 | -0.0003 | 0.00249 |
| 1.2E-05 | -0.0004 | 0.00017 | -0.0012 | 0.00036 | 0.00228 |
| 1.2E-05 | -0.0002 | 0.00051 | -0.0006 | 0.00121 | 0.00248 |
| 1.2E-05 | 0.00055 | -0.0007 | -0.0014 | 0.00091 | 0.00178 |
| 1.2E-05 | 0.00042 | 0.00023 | -0.0012 | 0.00026 | 0.00255 |
| 1.2E-05 | -0.0004 | -0.0006 | -0.0003 | -0.0001 | 0.00202 |
| 1.2E-05 | 5.5E-05 | -0.0008 | -0.001  | -0.0007 | 0.00201 |
| 1.2E-05 | -0.0005 | 0.00012 | -0.0005 | 0.00033 | 0.00175 |
| 1.2E-05 | -0.0006 | -0.0003 | -0.0012 | 0.00066 | 0.00186 |
| 1.2E-05 | -0.0003 | 1E-05   | -0.0011 | 0.00126 | 0.00238 |
| 1.2E-05 | -0.0003 | -0.0004 | -0.0019 | -1E-05  | 0.00238 |
| 1.2E-05 | -0.0007 | -8E-05  | -0.0014 | 0.00053 | 0.00187 |
| 1.2E-05 | 0.00067 | -0.0003 | -0.0022 | 0.00013 | 0.00229 |
| 1.2E-05 | 2.7E-05 | -0.0009 | -0.0013 | 0.0011  | 0.00248 |
| 1.2E-05 | -0.0011 | -0.0005 | -0.0012 | 0.00038 | 0.00258 |
| 1.2E-05 | -9E-05  | -0.0002 | -0.001  | 0.00044 | 0.00201 |
| 1.2E-05 | -0.0001 | -8E-05  | -0.0009 | 0.00057 | 0.00176 |
| 1.2E-05 | -0.0007 | 1.4E-05 | -0.0015 | 0.00127 | 0.00197 |
| 1.2E-05 | -3E-05  | -1E-05  | -0.0007 | 0.00013 | 0.00215 |
| 1.2E-05 | -0.0004 | -0.0007 | -0.0014 | 0.00107 | 0.00245 |
| 1.2E-05 | -0.0001 | -0.0015 | -0.0012 | 0.00094 | 0.00174 |
| 1.2E-05 | -0.0004 | 0.00043 | -0.0018 | 0.00026 | 0.00136 |
| 1.2E-05 | -0.0007 | 3.4E-06 | -0.0002 | -0.0003 | 0.00161 |
| 1.3E-05 | -0.0002 | -0.0001 | -0.001  | 0.0006  | 0.00159 |
| 1.3E-05 | -0.0001 | 0.00036 | -0.0011 | 0.00016 | 0.00236 |
| 1.3E-05 | 6.4E-05 | -0.0006 | -0.001  | -3E-05  | 0.00205 |
| 1.3E-05 | -0.0006 | -0.0004 | -0.001  | -2E-06  | 0.00275 |
| 1.3E-05 | -1E-04  | -0.0008 | -0.0008 | 0.00014 | 0.00136 |

|         |         |         |         |         |         |
|---------|---------|---------|---------|---------|---------|
| 1.3E-05 | 0.00014 | 0.00021 | -0.0023 | 0.00018 | 0.00175 |
| 1.3E-05 | -0.0004 | -0.0005 | -0.0013 | -0.0007 | 0.00185 |
| 1.3E-05 | 0.00025 | -0.0003 | -0.001  | -0.0001 | 0.00239 |
| 1.3E-05 | 6.5E-05 | 4.4E-05 | -0.0018 | 0.00088 | 0.00171 |
| 1.3E-05 | -0.0002 | -0.0002 | -0.0012 | 0.00026 | 0.00194 |
| 1.3E-05 | 5.7E-05 | -0.0011 | -0.001  | -0.0002 | 0.00224 |
| 1.3E-05 | 0.00021 | 0.0005  | -0.0014 | 0.00077 | 0.00184 |
| 1.3E-05 | 0.00037 | -0.0003 | -0.0012 | 0.00125 | 0.00251 |
| 1.3E-05 | 0.00045 | -0.0006 | -0.0012 | 0.00182 | 0.00243 |
| 1.3E-05 | -7E-05  | 0.00052 | -0.0011 | 0.0003  | 0.00208 |
| 1.3E-05 | -0.0001 | 0.00039 | -0.0023 | 0.00027 | 0.00194 |
| 1.3E-05 | 0.00044 | -0.0005 | -0.0014 | -0.0004 | 0.00161 |
| 1.3E-05 | -0.0005 | 0.00029 | -0.0012 | 9.4E-05 | 0.00284 |
| 1.3E-05 | -2E-05  | -4E-05  | -0.0008 | 0.0005  | 0.0021  |
| 1.3E-05 | 0.00012 | -0.0003 | -0.0011 | -0.0006 | 0.00247 |
| 1.3E-05 | -7E-05  | -0.0008 | -0.0012 | 0.00026 | 0.00166 |
| 1.3E-05 | -1E-05  | -0.0002 | -0.0012 | 0.00088 | 0.00186 |
| 1.3E-05 | -0.001  | -0.0004 | -0.0012 | -0.0007 | 0.0018  |
| 1.3E-05 | 0.0004  | -0.0009 | -0.0009 | 0.00092 | 0.00155 |
| 1.3E-05 | -0.0003 | -0.0007 | -0.0015 | 0.00062 | 0.0017  |
| 1.3E-05 | 0.00031 | -8E-05  | -0.0013 | 0.0002  | 0.00181 |
| 1.3E-05 | 0.00014 | -0.001  | -0.0015 | -0.0001 | 0.0019  |
| 1.3E-05 | 0.00041 | -0.0008 | -0.0008 | -0.0003 | 0.00248 |
| 1.3E-05 | -0.0002 | -0.001  | -0.001  | 0.00012 | 0.00267 |
| 1.3E-05 | -3E-05  | -0.0004 | -0.001  | 0.00105 | 0.00268 |
| 1.3E-05 | 0.00013 | -0.0004 | -0.0006 | 0.00031 | 0.00208 |
| 1.4E-05 | -5E-05  | -0.0013 | -0.001  | -0.0003 | 0.00294 |
| 1.4E-05 | 0.00076 | -5E-05  | -0.0015 | 0.00061 | 0.00239 |
| 1.4E-05 | -5E-07  | -0.0005 | -0.001  | 0.00025 | 0.00237 |
| 1.4E-05 | 0.00054 | 0.00018 | -0.0015 | 9.1E-05 | 0.00147 |
| 1.4E-05 | 0.00026 | 7.3E-05 | -0.0017 | 0.00043 | 0.00254 |
| 1.4E-05 | -0.0007 | -0.0006 | -0.0007 | 0.00017 | 0.0021  |
| 1.4E-05 | 0.00024 | -0.0005 | -0.0017 | 0.00101 | 0.00223 |
| 1.4E-05 | 0.0003  | -5E-05  | -0.001  | 0.00074 | 0.00262 |
| 1.4E-05 | -0.0001 | 0.00057 | -0.0012 | 0.00123 | 0.00191 |
| 1.4E-05 | 0.00019 | 0.00028 | -0.0004 | 1.9E-05 | 0.00181 |
| 1.4E-05 | 0.00048 | -0.0006 | -0.0006 | 0.00035 | 0.00227 |
| 1.4E-05 | -6E-05  | -0.0015 | -0.0011 | 0.00084 | 0.00151 |
| 1.4E-05 | 0.00013 | 0.00028 | -0.0014 | 0.00017 | 0.00294 |
| 1.4E-05 | 0.0003  | -0.0002 | -0.0009 | 0.00121 | 0.0011  |
| 1.4E-05 | 0.00048 | -0.0005 | -0.0011 | -6E-05  | 0.0009  |
| 1.4E-05 | -0.0001 | -0.0005 | -0.001  | 0.00031 | 0.00221 |
| 1.4E-05 | -6E-07  | -0.0002 | -0.0014 | 0.00031 | 0.00232 |
| 1.4E-05 | -0.0003 | -0.0009 | -0.0014 | -0.0003 | 0.00193 |
| 1.4E-05 | -0.0002 | -0.0014 | -0.0014 | 0.0004  | 0.00191 |
| 1.4E-05 | 3.4E-05 | -0.0008 | -0.0011 | 0.00039 | 0.00212 |
| 1.4E-05 | -0.0003 | -0.0012 | -0.0008 | 0.00027 | 0.00164 |
| 1.4E-05 | -4E-05  | -0.0006 | -0.0005 | 0.00093 | 0.00162 |
| 1.4E-05 | -0.0001 | -0.0006 | -0.0005 | -1E-04  | 0.00128 |
| 1.4E-05 | 5.8E-05 | -0.0004 | -0.0018 | 0.00015 | 0.00215 |
| 1.4E-05 | -0.0004 | -0.0007 | -0.0006 | 0.0005  | 0.00177 |
| 1.4E-05 | 0.00039 | -0.001  | -0.0014 | 0.0009  | 0.00187 |
| 1.4E-05 | -2E-05  | -0.0002 | -0.0012 | 0.00047 | 0.00178 |
| 1.4E-05 | 0.00127 | -0.0007 | -0.0013 | 0.00029 | 0.00161 |

|         |         |         |         |         |         |
|---------|---------|---------|---------|---------|---------|
| 1.4E-05 | -0.0003 | -0.0004 | -0.0011 | 9.9E-05 | 0.00221 |
| 1.4E-05 | -0.0003 | 1.3E-06 | -0.0012 | -0.0002 | 0.00223 |
| 1.4E-05 | 0.00049 | -0.0003 | -0.0011 | 0.00036 | 0.00206 |
| 1.5E-05 | 0.00045 | -2E-05  | -0.0007 | -0.0002 | 0.0021  |
| 1.5E-05 | -0.0002 | -0.0006 | -0.001  | 0.00089 | 0.00208 |
| 1.5E-05 | 0.00055 | -1E-06  | -0.0008 | -0.0004 | 0.0021  |
| 1.5E-05 | -0.0001 | -0.0004 | -0.0008 | 3.4E-05 | 0.00302 |
| 1.5E-05 | -0.0004 | -0.0007 | -0.0014 | 0.00093 | 0.00225 |
| 1.5E-05 | -0.0005 | -0.0006 | -0.0019 | 0.00074 | 0.00195 |
| 1.5E-05 | -0.0002 | -0.0011 | -0.001  | -0.0003 | 0.00233 |
| 1.5E-05 | -0.0003 | -0.0009 | -0.0012 | -0.0004 | 0.002   |
| 1.5E-05 | 0.00045 | -0.0013 | -0.0016 | -9E-05  | 0.0025  |
| 1.5E-05 | -0.0003 | -0.0001 | -0.0012 | 3.6E-05 | 0.00226 |
| 1.5E-05 | 0.00046 | -0.0008 | -0.0013 | 0.00017 | 0.00234 |
| 1.5E-05 | 9.1E-05 | 0.00011 | -0.0011 | 0.00028 | 0.00216 |
| 1.5E-05 | 0.00096 | -0.0009 | -0.0014 | -2E-05  | 0.00217 |
| 1.5E-05 | 0.00018 | -0.0004 | -0.0003 | 0.00049 | 0.00198 |
| 1.5E-05 | 0.00011 | -0.0003 | -0.0015 | -0.0004 | 0.00193 |
| 1.5E-05 | -6E-05  | 0.00037 | -0.0013 | -0.0008 | 0.00097 |

**Table SI.13:** Primary kinetic data for the reaction of 1-methyl- $\omega$ -heptalactam (**S13**) with CumO $\bullet$  generated by 355 nm LFP in MeCN (**Figure SI.13**).

| t / s   | $\Delta A$ 1-methyl- $\omega$ -heptalactam ( <b>S13</b> ) |               |               |               |              |
|---------|-----------------------------------------------------------|---------------|---------------|---------------|--------------|
|         | <b>0.173M</b>                                             | <b>0.337M</b> | <b>0.674M</b> | <b>0.990M</b> | <b>1.30M</b> |
| -1E-06  | -0.0005                                                   | 0.00015       | 0.00018       | -5E-05        | -0.0002      |
| -1E-06  | -0.0007                                                   | 0.00018       | 0.00021       | 0.00036       | -0.0004      |
| -9E-07  | -0.0006                                                   | 0.00093       | 0.00085       | -0.0004       | -0.0002      |
| -9E-07  | -0.0011                                                   | 0.00078       | 0.0006        | -0.0004       | -0.0005      |
| -9E-07  | -0.0006                                                   | 0.00028       | 6.6E-05       | -1E-04        | -0.0009      |
| -8E-07  | -0.0009                                                   | 0.00089       | 0.0002        | 0.00016       | -0.0009      |
| -8E-07  | -0.0008                                                   | -0.0001       | 0.00065       | 0.00011       | -0.0003      |
| -8E-07  | -0.0008                                                   | 0.00082       | 0.00043       | -0.0005       | -0.0006      |
| -7E-07  | -0.0005                                                   | 0.00078       | 0.00069       | -0.0002       | -0.0009      |
| -7E-07  | -0.0003                                                   | 0.00066       | 0.00077       | -0.0003       | -0.0008      |
| -7E-07  | 3E-05                                                     | 0.00045       | 0.0005        | -0.0002       | -0.0006      |
| -6E-07  | -0.0009                                                   | 0.00052       | 0.00046       | 0.00022       | -0.001       |
| -6E-07  | -0.0007                                                   | 0.00073       | 1E-05         | 0.00015       | -0.0007      |
| -6E-07  | -0.0007                                                   | 0.00063       | 0.00024       | 0.00073       | -0.0007      |
| -5E-07  | -0.0009                                                   | 0.0003        | -8E-07        | 0.00041       | -0.0005      |
| -5E-07  | -0.0004                                                   | 0.00087       | 0.00018       | -4E-05        | -0.0005      |
| -5E-07  | -0.0004                                                   | 0.00079       | -0.0001       | -0.0002       | -0.0002      |
| -4E-07  | -0.0011                                                   | 0.00052       | 0.00046       | -0.0001       | -0.0009      |
| -4E-07  | -0.0009                                                   | 0.00035       | 0.0007        | -0.0004       | -0.0009      |
| -4E-07  | -0.0008                                                   | 0.00098       | 0.0004        | 3.1E-05       | -0.0005      |
| -4E-07  | -0.0004                                                   | 0.00129       | -6E-05        | 0.00013       | -0.0006      |
| -3E-07  | -0.0009                                                   | 0.00083       | 0.00046       | -8E-05        | -0.0006      |
| -3E-07  | -0.0004                                                   | 0.0008        | -8E-05        | 0.00024       | -0.0003      |
| -3E-07  | -0.0006                                                   | 0.00109       | 0.00014       | 0.00038       | -0.0002      |
| -2E-07  | -0.0008                                                   | 0.00078       | 0.00083       | 0.00042       | -0.0008      |
| -2E-07  | -0.0006                                                   | 0.00089       | 0.00053       | -0.0006       | -0.0002      |
| -2E-07  | -0.0011                                                   | 0.00104       | -0.0001       | 0.00021       | -0.0004      |
| -1E-07  | -0.0011                                                   | 0.00142       | 0.00025       | 3.8E-05       | -0.0003      |
| -1E-07  | -0.0008                                                   | 0.00146       | 0.00056       | 0.00041       | -0.0002      |
| -6E-08  | -0.0006                                                   | 0.00081       | 0.00069       | 3.5E-05       | -0.0005      |
| -3E-08  | -0.0006                                                   | 0.00036       | 5.9E-05       | -0.0002       | -0.0006      |
| -4E-10  | -0.0028                                                   | -0.0028       | -0.0017       | -0.0036       | -0.0032      |
| 3.2E-08 | -0.0052                                                   | -0.0059       | -0.0073       | -0.0103       | -0.0121      |
| 6.4E-08 | 0.02154                                                   | 0.0225        | 0.02083       | 0.01987       | 0.01846      |
| 9.6E-08 | 0.02178                                                   | 0.02292       | 0.02127       | 0.02098       | 0.01971      |
| 1.3E-07 | 0.02142                                                   | 0.02201       | 0.02072       | 0.01966       | 0.01785      |
| 1.6E-07 | 0.02039                                                   | 0.02052       | 0.01939       | 0.01895       | 0.01662      |
| 1.9E-07 | 0.01944                                                   | 0.01862       | 0.01812       | 0.0172        | 0.01534      |
| 2.2E-07 | 0.01813                                                   | 0.01817       | 0.01723       | 0.01627       | 0.01482      |
| 2.6E-07 | 0.01796                                                   | 0.01786       | 0.0167        | 0.01502       | 0.01326      |
| 2.9E-07 | 0.01703                                                   | 0.01797       | 0.01614       | 0.01443       | 0.01292      |
| 3.2E-07 | 0.01719                                                   | 0.01695       | 0.01453       | 0.01352       | 0.01131      |
| 3.5E-07 | 0.01635                                                   | 0.01525       | 0.01451       | 0.01294       | 0.01126      |
| 3.8E-07 | 0.01599                                                   | 0.01508       | 0.01383       | 0.0123        | 0.01061      |
| 4.2E-07 | 0.01577                                                   | 0.01508       | 0.01445       | 0.01181       | 0.01018      |
| 4.5E-07 | 0.01425                                                   | 0.0148        | 0.01285       | 0.01139       | 0.0094       |
| 4.8E-07 | 0.01442                                                   | 0.0138        | 0.01259       | 0.01026       | 0.00891      |
| 5.1E-07 | 0.01415                                                   | 0.01394       | 0.01192       | 0.0105        | 0.00906      |
| 5.4E-07 | 0.01365                                                   | 0.01277       | 0.0115        | 0.00987       | 0.00773      |

|         |         |         |         |         |         |
|---------|---------|---------|---------|---------|---------|
| 5.8E-07 | 0.01373 | 0.01271 | 0.01091 | 0.00906 | 0.00777 |
| 6.1E-07 | 0.01211 | 0.01216 | 0.01037 | 0.00872 | 0.00742 |
| 6.4E-07 | 0.01209 | 0.01219 | 0.01031 | 0.00857 | 0.007   |
| 6.7E-07 | 0.01132 | 0.0106  | 0.01006 | 0.00868 | 0.00604 |
| 7E-07   | 0.0117  | 0.01176 | 0.00943 | 0.00678 | 0.00561 |
| 7.4E-07 | 0.01156 | 0.01082 | 0.01004 | 0.00669 | 0.00596 |
| 7.7E-07 | 0.01146 | 0.0105  | 0.00892 | 0.00738 | 0.00507 |
| 8E-07   | 0.01141 | 0.01056 | 0.00902 | 0.00686 | 0.00497 |
| 8.3E-07 | 0.01046 | 0.00974 | 0.00818 | 0.00688 | 0.0055  |
| 8.6E-07 | 0.01042 | 0.0104  | 0.00832 | 0.00629 | 0.00481 |
| 9E-07   | 0.01041 | 0.00984 | 0.00832 | 0.00597 | 0.00434 |
| 9.3E-07 | 0.01009 | 0.00923 | 0.00807 | 0.00578 | 0.0043  |
| 9.6E-07 | 0.0099  | 0.00873 | 0.00738 | 0.00534 | 0.00478 |
| 9.9E-07 | 0.0078  | 0.00946 | 0.00726 | 0.00524 | 0.004   |
| 1E-06   | 0.00948 | 0.00793 | 0.00613 | 0.00512 | 0.00395 |
| 1.1E-06 | 0.00834 | 0.00726 | 0.00682 | 0.00518 | 0.00402 |
| 1.1E-06 | 0.00801 | 0.00715 | 0.00673 | 0.00526 | 0.00367 |
| 1.1E-06 | 0.00827 | 0.00819 | 0.00618 | 0.00476 | 0.00394 |
| 1.2E-06 | 0.0081  | 0.00765 | 0.0056  | 0.00491 | 0.00354 |
| 1.2E-06 | 0.00801 | 0.00686 | 0.00635 | 0.0043  | 0.00342 |
| 1.2E-06 | 0.00802 | 0.00717 | 0.0059  | 0.00445 | 0.00352 |
| 1.2E-06 | 0.00781 | 0.00648 | 0.006   | 0.00417 | 0.00341 |
| 1.3E-06 | 0.00716 | 0.00636 | 0.00557 | 0.004   | 0.00276 |
| 1.3E-06 | 0.0069  | 0.00689 | 0.00534 | 0.00376 | 0.00293 |
| 1.3E-06 | 0.0066  | 0.00642 | 0.00592 | 0.00367 | 0.00305 |
| 1.4E-06 | 0.00712 | 0.0062  | 0.0053  | 0.00387 | 0.00283 |
| 1.4E-06 | 0.00589 | 0.0062  | 0.00556 | 0.0037  | 0.0024  |
| 1.4E-06 | 0.006   | 0.00588 | 0.00445 | 0.00287 | 0.00286 |
| 1.5E-06 | 0.00579 | 0.00632 | 0.00483 | 0.00321 | 0.00267 |
| 1.5E-06 | 0.00607 | 0.00545 | 0.00466 | 0.00322 | 0.00275 |
| 1.5E-06 | 0.00638 | 0.00515 | 0.0051  | 0.00366 | 0.00268 |
| 1.6E-06 | 0.00566 | 0.00549 | 0.00448 | 0.00218 | 0.00253 |
| 1.6E-06 | 0.00573 | 0.00487 | 0.00486 | 0.00318 | 0.00232 |
| 1.6E-06 | 0.00555 | 0.00468 | 0.00441 | 0.00322 | 0.00316 |
| 1.7E-06 | 0.00615 | 0.00522 | 0.00471 | 0.00281 | 0.00248 |
| 1.7E-06 | 0.00467 | 0.00458 | 0.00427 | 0.00202 | 0.0022  |
| 1.7E-06 | 0.0048  | 0.00447 | 0.00428 | 0.00233 | 0.00277 |
| 1.8E-06 | 0.00465 | 0.00436 | 0.00387 | 0.0021  | 0.00243 |
| 1.8E-06 | 0.00469 | 0.00539 | 0.00369 | 0.00285 | 0.00153 |
| 1.8E-06 | 0.00473 | 0.00484 | 0.00318 | 0.00229 | 0.00154 |
| 1.9E-06 | 0.00442 | 0.0049  | 0.00358 | 0.00193 | 0.00252 |
| 1.9E-06 | 0.00499 | 0.00527 | 0.00342 | 0.0025  | 0.00219 |
| 1.9E-06 | 0.00477 | 0.0043  | 0.00375 | 0.00183 | 0.00158 |
| 2E-06   | 0.00439 | 0.00392 | 0.00434 | 0.00256 | 0.00217 |
| 2E-06   | 0.00438 | 0.0044  | 0.004   | 0.00242 | 0.00259 |
| 2E-06   | 0.00352 | 0.0053  | 0.00382 | 0.00274 | 0.00196 |
| 2E-06   | 0.00377 | 0.00396 | 0.00384 | 0.00263 | 0.00125 |
| 2.1E-06 | 0.0037  | 0.00388 | 0.0035  | 0.00241 | 0.00165 |
| 2.1E-06 | 0.00345 | 0.00395 | 0.00334 | 0.00202 | 0.00165 |
| 2.1E-06 | 0.00389 | 0.00382 | 0.00334 | 0.00202 | 0.00241 |
| 2.2E-06 | 0.0042  | 0.00371 | 0.00332 | 0.00242 | 0.00205 |
| 2.2E-06 | 0.00414 | 0.00418 | 0.00405 | 0.00156 | 0.00203 |
| 2.2E-06 | 0.00351 | 0.00334 | 0.00313 | 0.00218 | 0.00157 |
| 2.3E-06 | 0.00325 | 0.00281 | 0.00315 | 0.00205 | 0.00194 |

|         |         |         |         |         |         |
|---------|---------|---------|---------|---------|---------|
| 2.3E-06 | 0.00373 | 0.0022  | 0.00287 | 0.00177 | 0.00217 |
| 2.3E-06 | 0.00325 | 0.00382 | 0.00362 | 0.00149 | 0.00161 |
| 2.4E-06 | 0.00353 | 0.00385 | 0.00356 | 0.00221 | 0.0023  |
| 2.4E-06 | 0.00214 | 0.00304 | 0.00353 | 0.0025  | 0.00181 |
| 2.4E-06 | 0.00365 | 0.00214 | 0.00304 | 0.00227 | 0.00231 |
| 2.5E-06 | 0.00375 | 0.0029  | 0.00306 | 0.00181 | 0.00233 |
| 2.5E-06 | 0.00252 | 0.00337 | 0.00323 | 0.00178 | 0.00223 |
| 2.5E-06 | 0.00268 | 0.00305 | 0.00283 | 0.00159 | 0.00189 |
| 2.6E-06 | 0.00296 | 0.00315 | 0.00331 | 0.0026  | 0.00214 |
| 2.6E-06 | 0.0032  | 0.00342 | 0.00329 | 0.00188 | 0.00221 |
| 2.6E-06 | 0.00265 | 0.00314 | 0.00288 | 0.00219 | 0.00186 |
| 2.7E-06 | 0.00261 | 0.00264 | 0.00331 | 0.00165 | 0.00151 |
| 2.7E-06 | 0.00298 | 0.00303 | 0.00316 | 0.00241 | 0.00224 |
| 2.7E-06 | 0.00287 | 0.00376 | 0.00315 | 0.00192 | 0.00189 |
| 2.8E-06 | 0.00179 | 0.00337 | 0.00299 | 0.00176 | 0.00204 |
| 2.8E-06 | 0.00287 | 0.00358 | 0.00298 | 0.0017  | 0.00196 |
| 2.8E-06 | 0.00259 | 0.00239 | 0.00261 | 0.00171 | 0.00205 |
| 2.8E-06 | 0.00246 | 0.00247 | 0.00278 | 0.0018  | 0.00226 |
| 2.9E-06 | 0.00208 | 0.00267 | 0.00315 | 0.00186 | 0.00267 |
| 2.9E-06 | 0.00291 | 0.0033  | 0.00315 | 0.00182 | 0.00251 |
| 2.9E-06 | 0.00246 | 0.00326 | 0.0033  | 0.00186 | 0.00228 |
| 3E-06   | 0.00226 | 0.00276 | 0.00374 | 0.00174 | 0.00199 |
| 3E-06   | 0.00252 | 0.00309 | 0.00318 | 0.00219 | 0.00159 |
| 3E-06   | 0.00266 | 0.00322 | 0.00266 | 0.00136 | 0.00166 |
| 3.1E-06 | 0.00265 | 0.00283 | 0.00285 | 0.00178 | 0.00185 |
| 3.1E-06 | 0.00219 | 0.00235 | 0.00274 | 0.00193 | 0.00247 |
| 3.1E-06 | 0.00237 | 0.00262 | 0.00275 | 0.00141 | 0.00242 |
| 3.2E-06 | 0.00241 | 0.00241 | 0.00264 | 0.0022  | 0.00253 |
| 3.2E-06 | 0.00219 | 0.00219 | 0.0027  | 0.00219 | 0.00134 |
| 3.2E-06 | 0.0023  | 0.00299 | 0.00276 | 0.00197 | 0.00144 |
| 3.3E-06 | 0.0011  | 0.00212 | 0.0027  | 0.00208 | 0.00128 |
| 3.3E-06 | 0.00205 | 0.00282 | 0.00288 | 0.00196 | 0.00187 |
| 3.3E-06 | 0.00198 | 0.0029  | 0.0025  | 0.00131 | 0.00142 |
| 3.4E-06 | 0.00158 | 0.0029  | 0.00244 | 0.00078 | 0.00178 |
| 3.4E-06 | 0.00232 | 0.00228 | 0.00264 | 0.00108 | 0.00146 |
| 3.4E-06 | 0.00202 | 0.00252 | 0.00269 | 0.00221 | 0.00196 |
| 3.5E-06 | 0.00163 | 0.00211 | 0.00238 | 0.00109 | 0.00194 |
| 3.5E-06 | 0.00182 | 0.0025  | 0.00222 | 0.00135 | 0.00175 |
| 3.5E-06 | 0.00228 | 0.00225 | 0.00218 | 0.00135 | 0.00171 |
| 3.6E-06 | 0.00248 | 0.00215 | 0.00311 | 0.00172 | 0.00211 |
| 3.6E-06 | 0.00215 | 0.00246 | 0.00284 | 0.00128 | 0.00189 |
| 3.6E-06 | 0.00234 | 0.00219 | 0.00186 | 0.00134 | 0.00158 |
| 3.6E-06 | 0.00166 | 0.00292 | 0.00213 | 0.00151 | 0.00146 |
| 3.7E-06 | 0.00198 | 0.00202 | 0.00177 | 0.00148 | 0.00133 |
| 3.7E-06 | 0.00116 | 0.00209 | 0.00206 | 0.00036 | 0.00182 |
| 3.7E-06 | 0.0021  | 0.0029  | 0.00203 | 0.00112 | 0.00163 |
| 3.8E-06 | 0.0019  | 0.00146 | 0.00214 | 0.00123 | 0.00176 |
| 3.8E-06 | 0.00162 | 0.00219 | 0.00207 | 0.00094 | 0.00189 |
| 3.8E-06 | 0.00127 | 0.00225 | 0.00203 | 0.00089 | 0.00183 |
| 3.9E-06 | 0.0011  | 0.00198 | 0.00176 | 0.00138 | 0.00194 |
| 3.9E-06 | 0.00131 | 0.00214 | 0.00224 | 0.00188 | 0.00184 |
| 3.9E-06 | 0.00134 | 0.00279 | 0.00273 | 0.00109 | 0.0021  |
| 4E-06   | 0.00155 | 0.00252 | 0.00199 | 0.00116 | 0.00145 |
| 4E-06   | 0.00159 | 0.00198 | 0.00279 | 0.00137 | 0.00119 |



|         |         |         |         |         |         |
|---------|---------|---------|---------|---------|---------|
| 4E-06   | 0.00175 | 0.00154 | 0.00181 | 0.00122 | 0.00193 |
| 4.1E-06 | 0.00145 | 0.00289 | 0.00166 | 0.00082 | 0.00121 |
| 4.1E-06 | 0.00086 | 0.00234 | 0.00297 | 0.00125 | 0.00131 |
| 4.1E-06 | 0.00184 | 0.00236 | 0.00179 | 0.00104 | 0.00179 |
| 4.2E-06 | 0.00195 | 0.00126 | 0.00277 | 0.0009  | 0.0022  |
| 4.2E-06 | 0.00183 | 0.00155 | 0.00173 | 0.00102 | 0.00112 |
| 4.2E-06 | 0.00097 | 0.00149 | 0.00237 | 0.0013  | 0.00174 |
| 4.3E-06 | 0.00158 | 0.00203 | 0.00226 | 0.00109 | 0.00204 |
| 4.3E-06 | 0.00161 | 0.00119 | 0.00167 | 0.00132 | 0.00141 |
| 4.3E-06 | 0.00058 | 0.00114 | 0.00215 | 0.00123 | 0.00109 |
| 4.4E-06 | 0.00125 | 0.00119 | 0.00244 | 0.00176 | 0.00166 |
| 4.4E-06 | 0.0009  | 0.00106 | 0.00165 | 0.00125 | 0.00152 |
| 4.4E-06 | 0.00058 | 0.00146 | 0.00158 | 0.00135 | 0.00141 |
| 4.4E-06 | 0.00081 | 0.00211 | 0.00197 | 0.00063 | 0.00155 |
| 4.5E-06 | 0.00146 | 0.00244 | 0.00168 | 0.00096 | 0.0014  |
| 4.5E-06 | 0.00141 | 0.0017  | 0.00138 | 0.00074 | 0.00129 |
| 4.5E-06 | 0.00114 | 0.0021  | 0.00207 | 0.00098 | 0.00085 |
| 4.6E-06 | 0.0013  | 0.00208 | 0.00201 | 0.00073 | 0.00136 |
| 4.6E-06 | 0.00141 | 0.00232 | 0.00199 | 0.0011  | 0.00126 |
| 4.6E-06 | 0.00125 | 0.00252 | 0.00238 | 0.0015  | 0.00168 |
| 4.7E-06 | 0.00172 | 0.00152 | 0.00256 | 0.00091 | 0.00131 |
| 4.7E-06 | 0.00099 | 0.00162 | 0.00102 | 0.00108 | 0.00175 |
| 4.7E-06 | 0.00089 | 0.00165 | 0.0018  | 0.0012  | 0.00147 |
| 4.8E-06 | 0.00115 | 0.0021  | 0.00247 | 0.00102 | 0.00204 |
| 4.8E-06 | 0.00117 | 0.00261 | 0.00234 | 0.00093 | 0.00058 |
| 4.8E-06 | 0.00089 | 0.00087 | 0.00283 | 0.00117 | 0.00222 |
| 4.9E-06 | 0.00096 | 0.00121 | 0.002   | 0.00092 | 0.00186 |
| 4.9E-06 | 0.00087 | 0.00173 | 0.00129 | 0.00114 | 0.00088 |
| 4.9E-06 | 0.00106 | 0.00191 | 0.00142 | 0.00051 | 0.00137 |
| 5E-06   | 0.00129 | 0.00141 | 0.00169 | 0.00115 | 0.0011  |
| 5E-06   | 0.00074 | 0.00184 | 0.00153 | 0.00148 | 0.00164 |
| 5E-06   | 0.00072 | 0.00197 | 0.00143 | 0.00126 | 0.00121 |
| 5.1E-06 | 0.00119 | 0.00123 | 0.00148 | 0.00104 | 0.0014  |
| 5.1E-06 | 0.00082 | 0.00217 | 0.00184 | 0.00121 | 0.00105 |
| 5.1E-06 | 0.00107 | 0.00181 | 0.00124 | 0.00106 | 0.0012  |
| 5.2E-06 | 0.00113 | 0.00155 | 0.00129 | 0.00111 | 0.00081 |
| 5.2E-06 | 0.00102 | 0.00093 | 0.00172 | 0.00165 | 0.0015  |
| 5.2E-06 | 0.00096 | 0.00189 | 0.00128 | 0.00098 | 0.00116 |
| 5.2E-06 | 0.00088 | 0.00244 | 0.0012  | 0.0002  | 0.00079 |
| 5.3E-06 | 0.00149 | 0.00131 | 0.00152 | 0.00091 | 0.00145 |
| 5.3E-06 | 0.00091 | 0.00199 | 0.00212 | 0.00125 | 0.00175 |
| 5.3E-06 | 0.00092 | 0.00188 | 0.00177 | 0.00095 | 0.00129 |
| 5.4E-06 | 0.00088 | 0.00183 | 0.00153 | 0.00089 | 0.00182 |
| 5.4E-06 | 0.00081 | 0.00201 | 0.00105 | 0.00051 | 0.00107 |
| 5.4E-06 | 0.00069 | 0.00181 | 0.00107 | 0.00043 | 0.00141 |
| 5.5E-06 | 0.00056 | 0.00185 | 0.00142 | 0.00094 | 0.00141 |
| 5.5E-06 | 0.00056 | 0.00057 | 0.00116 | 0.00063 | 0.00181 |
| 5.5E-06 | 0.00088 | 0.00116 | 0.00185 | 0.00092 | 0.00107 |
| 5.6E-06 | 0.00127 | 0.0013  | 0.00145 | 0.00119 | 0.00169 |
| 5.6E-06 | 0.00055 | 0.0007  | 0.00142 | 0.00152 | 0.00135 |
| 5.6E-06 | 0.00125 | 0.00089 | 0.00129 | 0.00067 | 0.00115 |
| 5.7E-06 | 0.00074 | 0.00089 | 0.00113 | 0.00131 | 0.00077 |
| 5.7E-06 | 0.00107 | 0.00112 | 0.00223 | 0.00132 | 0.00118 |
| 5.7E-06 | 0.00122 | 0.00107 | 0.00193 | 0.00119 | 0.00129 |

|         |         |         |         |         |         |
|---------|---------|---------|---------|---------|---------|
| 5.8E-06 | 0.00101 | 0.00163 | 0.00105 | 0.00108 | 0.00138 |
| 5.8E-06 | 9.9E-05 | 0.00197 | 0.00161 | 0.00125 | 0.00095 |
| 5.8E-06 | 0.00054 | 0.00148 | 0.0009  | 0.00087 | 0.00054 |
| 5.9E-06 | 0.00074 | 0.00153 | 0.00093 | 0.00116 | 0.00112 |
| 5.9E-06 | 0.00084 | 0.00133 | 0.00143 | 0.00084 | 0.00148 |
| 5.9E-06 | 0.00024 | 0.0016  | 0.00116 | 0.00174 | 0.00072 |
| 6E-06   | 0.00063 | 0.00245 | 0.0012  | 0.00153 | 0.00069 |
| 6E-06   | 0.00097 | 0.00175 | 0.00094 | 0.00101 | 0.00075 |
| 6E-06   | 0.00114 | 0.00152 | 0.00182 | 0.00181 | 0.00137 |
| 6E-06   | 0.00068 | 0.00155 | 0.001   | 0.00095 | 0.00101 |
| 6.1E-06 | 0.0004  | 0.00132 | 0.00138 | 0.00093 | 0.00082 |
| 6.1E-06 | 0.00129 | 0.00191 | 0.00159 | 0.00032 | 0.00146 |
| 6.1E-06 | 0.00173 | 0.00161 | 0.00168 | 0.00094 | 0.00125 |
| 6.2E-06 | 0.00103 | 0.00228 | 0.00135 | 0.0011  | 0.00129 |
| 6.2E-06 | 0.00104 | 0.00132 | 0.00148 | 0.00118 | 0.001   |
| 6.2E-06 | 0.00053 | 0.00129 | 0.00157 | 0.00075 | 0.00083 |
| 6.3E-06 | 0.0001  | 0.00159 | 0.00164 | 0.00067 | 0.00084 |
| 6.3E-06 | 0.00103 | 0.00117 | 0.00126 | 0.00097 | 0.0015  |
| 6.3E-06 | 0.00074 | 0.00141 | 0.00142 | 0.00064 | 0.00149 |
| 6.4E-06 | 0.00021 | 0.00195 | 0.00145 | 0.00097 | 0.00055 |
| 6.4E-06 | 0.00151 | 0.00151 | 0.00176 | 0.00084 | 0.00086 |
| 6.4E-06 | 0.00138 | 0.00189 | 0.00121 | 0.00131 | 0.00057 |
| 6.5E-06 | -4E-05  | 0.00138 | 0.00132 | 0.00124 | 0.00115 |
| 6.5E-06 | 0.0001  | 0.00223 | 0.00177 | 0.00087 | 0.00129 |
| 6.5E-06 | 0.00029 | 0.00157 | 0.00096 | 0.00152 | 0.00073 |
| 6.6E-06 | 0.00073 | 0.00193 | 0.00109 | 0.00074 | 0.00054 |
| 6.6E-06 | 0.00137 | 0.00137 | 0.00079 | 0.00091 | 0.0012  |
| 6.6E-06 | 0.00023 | 0.00204 | 0.00186 | 0.00058 | 0.00066 |
| 6.7E-06 | 0.00063 | 0.00165 | 0.00186 | 0.00065 | 0.00102 |
| 6.7E-06 | 0.00077 | 0.00246 | 0.00115 | 0.00144 | 0.00093 |
| 6.7E-06 | 0.0009  | 0.00116 | 0.00049 | 0.00113 | 0.00068 |
| 6.8E-06 | 0.00083 | 0.00165 | 0.00174 | 0.00128 | 0.00121 |
| 6.8E-06 | 0.00061 | 0.00225 | 0.00162 | 0.00056 | 0.00064 |
| 6.8E-06 | 0.00066 | 0.00239 | 0.00133 | 0.00037 | 0.00074 |
| 6.8E-06 | 0.00069 | 0.00218 | 0.00165 | 0.00093 | 0.00117 |
| 6.9E-06 | 0.00024 | 0.00186 | 0.00142 | 0.0012  | 0.00072 |
| 6.9E-06 | 0.00031 | 0.00129 | 0.00155 | 0.00047 | 0.00132 |
| 6.9E-06 | 0.00068 | 0.00094 | 0.00186 | 0.00079 | 0.00097 |
| 7E-06   | 0.00101 | 0.00175 | 0.0016  | 0.00127 | 0.0006  |
| 7E-06   | 0.00104 | 0.00155 | 0.001   | 0.00087 | 0.00067 |
| 7E-06   | -2E-06  | 0.00164 | 0.00113 | 0.00106 | 0.00089 |
| 7.1E-06 | 0.00012 | 0.00126 | 0.00116 | 0.00109 | 0.00054 |
| 7.1E-06 | 5.1E-05 | 0.00135 | 0.00212 | 0.001   | 0.00073 |
| 7.1E-06 | -0.0003 | 0.00153 | 0.00154 | 0.00104 | 0.00116 |
| 7.2E-06 | -0.0003 | 0.00182 | 0.00037 | 0.00094 | 0.00053 |
| 7.2E-06 | 0.00046 | 0.00148 | 0.00154 | 0.00076 | 0.00138 |
| 7.2E-06 | -0.0001 | 0.00163 | 0.00233 | 0.00121 | 0.00078 |
| 7.3E-06 | 0.00071 | 0.00188 | 0.00203 | 0.00157 | 0.00073 |
| 7.3E-06 | 0.00068 | 0.00184 | 0.00141 | 0.00141 | 0.00069 |
| 7.3E-06 | 0.00046 | 0.0018  | 0.0012  | 0.00147 | 0.00109 |
| 7.4E-06 | 0.00093 | 0.00135 | 0.0021  | 0.00088 | 0.0009  |
| 7.4E-06 | 0.00124 | 0.0017  | 0.00134 | 0.00095 | 0.00083 |
| 7.4E-06 | -0.0002 | 0.00031 | 0.00132 | 0.00193 | -0.0001 |
| 7.5E-06 | 0.0008  | 0.00127 | 0.00195 | 0.00083 | 0.00088 |

|         |         |         |         |         |         |
|---------|---------|---------|---------|---------|---------|
| 7.5E-06 | 0.00038 | 0.00182 | 0.00091 | 0.00085 | 0.00083 |
| 7.5E-06 | 0.00038 | 0.00163 | 0.00145 | 0.00098 | 0.00055 |
| 7.6E-06 | 0.00027 | 0.00136 | 0.00178 | 0.00113 | 0.00075 |
| 7.6E-06 | 0.00054 | 0.00163 | 0.00144 | 0.00069 | 0.001   |
| 7.6E-06 | 0.00027 | 0.00189 | 0.00144 | 0.0013  | 0.00041 |
| 7.6E-06 | 3.1E-05 | 0.00183 | 0.00123 | 0.00079 | 0.00152 |
| 7.7E-06 | 0.00058 | 0.00166 | 0.00138 | 0.0009  | 0.0005  |
| 7.7E-06 | 0.00038 | 0.00169 | 0.0013  | 0.00097 | 0.00077 |
| 7.7E-06 | 0.00031 | 0.00175 | 0.00133 | 0.00131 | 0.0014  |
| 7.8E-06 | 0.00012 | 0.00149 | 0.00131 | 0.00125 | 0.00149 |
| 7.8E-06 | 0.00062 | 0.00118 | 0.00086 | 0.0006  | 0.00065 |
| 7.8E-06 | 0.00016 | 0.00143 | 0.00148 | 0.00093 | 0.00158 |
| 7.9E-06 | 5E-06   | 0.00104 | 0.00137 | 0.00081 | 0.00103 |
| 7.9E-06 | 0.00034 | 0.00131 | 0.00137 | 0.00101 | 0.00092 |
| 7.9E-06 | 0.00063 | 0.00039 | 0.00107 | 0.00051 | 0.00111 |
| 8E-06   | 0.00057 | 0.00153 | 0.00113 | 0.00179 | 0.00085 |
| 8E-06   | 0.0005  | 0.00145 | 0.00145 | 0.00158 | 0.00115 |
| 8E-06   | -0.0003 | 0.00093 | 0.00108 | 0.00149 | 0.00036 |
| 8.1E-06 | 0.00054 | 0.00074 | 0.00223 | 0.00133 | 0.00118 |
| 8.1E-06 | 0.00069 | 0.00192 | 0.00186 | 0.00167 | 0.00053 |
| 8.1E-06 | 0.00026 | 0.00131 | 0.00145 | 0.00048 | 0.00195 |
| 8.2E-06 | 0.0002  | 0.00186 | 0.00201 | 0.00081 | 0.0016  |
| 8.2E-06 | 0.00059 | 0.00196 | 0.00147 | 0.00134 | 0.00102 |
| 8.2E-06 | -0.0002 | 0.00108 | 0.0021  | 0.00183 | 0.00135 |
| 8.3E-06 | -0.0001 | 0.00116 | 0.00163 | 0.00133 | 0.00122 |
| 8.3E-06 | -0.0004 | 0.00042 | 0.00182 | 0.00058 | 0.00117 |
| 8.3E-06 | 5.2E-05 | 0.00052 | 0.00209 | 0.00117 | 0.00052 |
| 8.4E-06 | 0.00067 | 0.00125 | 0.00175 | 0.00041 | 0.00165 |
| 8.4E-06 | 0.00056 | 0.00167 | 0.00087 | 0.00119 | 0.00065 |
| 8.4E-06 | 0.00091 | 0.00237 | 0.00108 | 0.00093 | 0.00042 |
| 8.4E-06 | 0.0006  | 0.00112 | 0.00208 | 0.00092 | 0.00095 |
| 8.5E-06 | -0.0001 | 0.00204 | 0.0016  | 0.00057 | 0.00092 |
| 8.5E-06 | -0.0003 | 0.00124 | 0.00207 | 0.00159 | 0.0011  |
| 8.5E-06 | -4E-05  | 0.0011  | 0.00185 | 0.00139 | 0.00101 |
| 8.6E-06 | 0.00052 | 0.00201 | 0.00177 | 0.001   | 0.00069 |
| 8.6E-06 | 0.00065 | 0.00103 | 0.0023  | 0.00123 | 0.0006  |
| 8.6E-06 | 0.00056 | 0.00156 | 0.00163 | 0.00104 | 0.00086 |
| 8.7E-06 | 0.00074 | 0.00187 | 0.00171 | 0.00036 | 0.00195 |
| 8.7E-06 | 0.00012 | 0.00126 | 0.00176 | 0.00127 | 0.00066 |
| 8.7E-06 | 0.00072 | 0.0012  | 0.00186 | 0.00169 | 0.00107 |
| 8.8E-06 | -4E-06  | 0.00156 | 0.00139 | 0.0009  | 0.00106 |
| 8.8E-06 | 0.0003  | 0.00164 | 0.00231 | 0.00116 | 0.00049 |
| 8.8E-06 | 6.2E-05 | 0.00148 | 0.00198 | 0.00039 | 0.00148 |
| 8.9E-06 | 0.00022 | 0.0004  | 0.00112 | 0.0016  | 0.00044 |
| 8.9E-06 | 0.00035 | 0.00189 | 0.00179 | 0.00103 | 0.0009  |
| 8.9E-06 | 0.00067 | 0.00188 | 0.00114 | 0.00138 | 0.00073 |
| 9E-06   | 0.00066 | 0.00188 | 0.00176 | 0.00109 | 0.00034 |
| 9E-06   | 0.00045 | 0.00195 | 0.00015 | 0.00155 | 0.00062 |
| 9E-06   | 0.00022 | 0.00133 | 0.00116 | 0.00095 | 0.00071 |
| 9.1E-06 | -9E-05  | 0.00177 | 0.00158 | 0.00029 | 0.00081 |
| 9.1E-06 | -0.0002 | 0.00038 | 0.00073 | 0.00091 | 0.00122 |
| 9.1E-06 | 0.0006  | 0.00206 | 0.00098 | 0.00134 | 0.00105 |
| 9.2E-06 | 0.0003  | 0.00143 | 0.0018  | 0.00085 | 0.00092 |
| 9.2E-06 | 0.00024 | 0.00072 | 0.00152 | 0.00073 | 0.00073 |

|         |         |         |         |         |         |
|---------|---------|---------|---------|---------|---------|
| 9.2E-06 | 0.00085 | 0.00108 | 0.00211 | 0.0015  | 0.00045 |
| 9.2E-06 | 0.00037 | 0.00113 | 0.00201 | 0.0006  | 0.00063 |
| 9.3E-06 | 6.1E-05 | 0.00084 | 0.00172 | 0.00012 | 0.0015  |
| 9.3E-06 | 0.00033 | 0.00189 | 0.00123 | 0.00151 | 0.00022 |
| 9.3E-06 | -0.0003 | 0.00151 | 0.00134 | 0.0007  | 0.0004  |
| 9.4E-06 | -0.0002 | 0.00152 | 0.00199 | 0.00115 | 0.00057 |
| 9.4E-06 | -0.0001 | 0.00164 | 0.00189 | 0.00091 | 0.00136 |
| 9.4E-06 | 0.00042 | 0.00098 | 0.00195 | 0.00128 | 0.00032 |
| 9.5E-06 | 0.00029 | 0.00147 | 0.00144 | 0.00123 | 0.00109 |
| 9.5E-06 | -0.0007 | 0.00164 | 0.00181 | 0.00039 | 0.00169 |
| 9.5E-06 | 0.00035 | 0.00141 | 0.0019  | 0.00108 | 0.00092 |
| 9.6E-06 | 3.4E-05 | 0.00098 | 0.00132 | 0.00098 | 0.00062 |
| 9.6E-06 | -0.0003 | 0.00141 | 0.00121 | 0.00149 | 0.00044 |
| 9.6E-06 | -0.0003 | 0.0012  | 0.00093 | 0.00058 | 0.00081 |
| 9.7E-06 | 0.00075 | 0.0015  | 0.00113 | 0.00104 | 0.00057 |
| 9.7E-06 | 0.00015 | 0.00153 | 0.00157 | 0.0007  | 0.00066 |
| 9.7E-06 | 0.00083 | 0.00098 | 0.00136 | 0.00111 | 0.00113 |
| 9.8E-06 | 0.00048 | 0.00133 | 0.00098 | 0.0013  | 0.00063 |
| 9.8E-06 | -0.0002 | 0.00155 | 0.00103 | 0.00123 | 0.00069 |
| 9.8E-06 | 0.00042 | 0.00206 | 0.00181 | 0.00087 | 0.00091 |
| 9.9E-06 | -8E-05  | 0.00113 | 0.00075 | 0.00116 | 0.0014  |
| 9.9E-06 | -1E-05  | 0.00253 | 0.00168 | 0.00112 | 0.00126 |
| 9.9E-06 | 0.0002  | 0.00122 | 0.00124 | 0.00165 | 0.00146 |
| 1E-05   | -0.0005 | 0.00159 | 0.00154 | 0.00103 | 0.00065 |
| 1E-05   | 0.00014 | 0.00127 | 0.00182 | 0.00044 | 0.00017 |
| 1E-05   | 0.00023 | 0.00089 | 0.00205 | 0.00062 | 0.0011  |
| 1E-05   | 0.00063 | 0.00145 | 0.00162 | 0.00098 | 0.00095 |
| 1E-05   | -0.0002 | 0.00164 | 0.00181 | 0.00107 | 0.00048 |
| 1E-05   | -0.0001 | 0.0012  | 0.00083 | 0.0005  | 0.00069 |
| 1E-05   | -0.0004 | 0.00159 | 0.00131 | 0.00131 | 0.00094 |
| 1E-05   | -2E-05  | 0.00114 | 0.00124 | 0.00146 | 0.00071 |
| 1E-05   | -4E-05  | 0.00122 | 0.00161 | 0.00113 | 0.00089 |
| 1E-05   | 6.4E-05 | 0.00173 | 0.00183 | 0.0008  | 0.0005  |
| 1E-05   | 0.00106 | 0.00159 | 0.00215 | 0.00081 | 0.00066 |
| 1E-05   | 0.00014 | 0.00224 | 0.00094 | 0.00038 | 0.00072 |
| 1E-05   | -9E-06  | 0.00098 | 0.00144 | 0.00122 | 0.00123 |
| 1E-05   | 9.6E-05 | 0.00103 | 0.00151 | 0.00121 | 0.00119 |
| 1E-05   | -0.0006 | 0.00069 | 0.00219 | 0.00104 | 0.00086 |
| 1E-05   | 0.00059 | 0.00064 | 0.00185 | 0.00069 | -4E-05  |
| 1E-05   | -0.0002 | 0.00111 | 0.00215 | 0.0012  | 0.00043 |
| 1.1E-05 | 9.7E-05 | 0.00038 | 0.00202 | 0.00071 | 0.00083 |
| 1.1E-05 | 0.00027 | 0.00107 | 0.00135 | 0.00108 | 0.00142 |
| 1.1E-05 | 0.00026 | 0.00098 | 0.00099 | 0.0009  | 0.00039 |
| 1.1E-05 | 9.6E-05 | 0.00074 | 0.00206 | 0.00145 | 0.00086 |
| 1.1E-05 | 0.00086 | 0.00182 | 0.00147 | 0.00119 | 0.00052 |
| 1.1E-05 | 0.00104 | 0.00129 | 0.00164 | 0.00079 | 0.00073 |
| 1.1E-05 | 0.00033 | 0.00076 | 0.00133 | 0.00145 | 0.00025 |
| 1.1E-05 | 0.00031 | 0.00048 | 0.00171 | 0.00174 | 0.00087 |
| 1.1E-05 | 0.00023 | 0.00213 | 0.00095 | 0.00166 | 0.00082 |
| 1.1E-05 | -8E-05  | 0.00171 | 0.00113 | 0.00135 | 0.00064 |
| 1.1E-05 | 0.00041 | 0.00156 | 0.00158 | 0.00056 | 0.00075 |
| 1.1E-05 | 0.00051 | 0.00156 | 0.00085 | 0.00103 | 0.0013  |
| 1.1E-05 | -0.0005 | 0.00185 | 0.0022  | 0.00106 | 0.00079 |
| 1.1E-05 | 0.00082 | 0.00197 | 0.00131 | 0.0004  | 0.00072 |

|         |         |         |         |         |         |
|---------|---------|---------|---------|---------|---------|
| 1.1E-05 | -0.0003 | 0.00137 | 0.00176 | 0.00117 | 0.00096 |
| 1.1E-05 | -5E-06  | 0.00086 | 0.00205 | 0.00081 | 0.00125 |
| 1.1E-05 | -0.0002 | 0.00071 | 0.00123 | 0.00098 | 0.00085 |
| 1.1E-05 | 8.6E-05 | 0.00074 | 0.00125 | 0.00131 | 0.00111 |
| 1.1E-05 | 0.00062 | 0.00116 | 0.00175 | 0.00074 | 0.00098 |
| 1.1E-05 | 0.00036 | 0.0014  | 0.00094 | 0.00133 | 0.00084 |
| 1.1E-05 | 5.4E-05 | 0.0016  | 0.00113 | 0.00157 | 0.00042 |
| 1.1E-05 | 0.00065 | 0.00251 | 0.00168 | 0.00108 | 0.00125 |
| 1.1E-05 | 0.00048 | 0.00113 | 0.00214 | 0.00152 | 0.00078 |
| 1.1E-05 | 2E-05   | 0.00089 | 0.00119 | 0.00099 | 0.00082 |
| 1.1E-05 | 0.00041 | 0.00148 | 0.00179 | 0.00121 | 0.00128 |
| 1.1E-05 | 0.00013 | 0.00117 | 0.00149 | 0.00071 | 0.00113 |
| 1.1E-05 | 0.00058 | 0.00075 | 0.00115 | 0.00095 | 0.00061 |
| 1.1E-05 | 0.00028 | 0.00097 | 0.00158 | 0.00112 | 0.00056 |
| 1.1E-05 | -0.0001 | 0.00088 | 0.00133 | 0.00087 | 0.00085 |
| 1.1E-05 | 3.1E-05 | 0.00129 | 0.00116 | 0.00145 | 0.00064 |
| 1.1E-05 | -3E-05  | 0.00147 | 0.00204 | 0.00118 | 0.00105 |
| 1.1E-05 | 0.00043 | 0.00238 | 0.0021  | 0.0013  | 0.00126 |
| 1.2E-05 | 0.00031 | 0.00159 | 0.00146 | 0.00096 | 0.00083 |
| 1.2E-05 | -0.0007 | 0.0016  | 0.002   | 0.00134 | 0.00108 |
| 1.2E-05 | 0.00012 | 0.00189 | 0.00161 | 0.0012  | 0.00043 |
| 1.2E-05 | -6E-06  | 0.0005  | 0.00212 | 0.00073 | 0.00078 |
| 1.2E-05 | 0.00019 | 0.00059 | 0.00142 | 0.00108 | 0.00158 |
| 1.2E-05 | -2E-05  | 0.0011  | 0.00155 | 0.00109 | 0.00104 |
| 1.2E-05 | 0.00035 | 0.00161 | 0.00237 | 0.00107 | 0.00101 |
| 1.2E-05 | 0.00018 | 0.00086 | 0.00145 | 0.00056 | 0.00084 |
| 1.2E-05 | 0.00024 | 0.00174 | 0.00238 | 0.00079 | 0.00133 |
| 1.2E-05 | -0.0002 | 0.00085 | 0.00177 | 0.00108 | 0.00012 |
| 1.2E-05 | 0.00012 | 0.00169 | 0.00163 | 0.0016  | 0.00134 |
| 1.2E-05 | -0.0004 | 0.00191 | 0.00186 | 0.00138 | 0.00102 |
| 1.2E-05 | 0.0002  | 0.00102 | 0.00183 | 0.00114 | 0.00103 |
| 1.2E-05 | 0.00011 | 0.00132 | 0.00168 | 0.00121 | 0.00093 |
| 1.2E-05 | -0.0005 | 0.00059 | 0.00087 | 0.00142 | 0.00082 |
| 1.2E-05 | 0.00044 | 0.00116 | 0.00173 | 0.00125 | 0.00091 |
| 1.2E-05 | -7E-05  | 0.00106 | 0.00109 | 0.00197 | 0.00098 |
| 1.2E-05 | 7.5E-06 | 0.00079 | 0.00146 | 0.00176 | 0.00088 |
| 1.2E-05 | 7.7E-05 | 0.00063 | 0.00208 | 0.0017  | 0.00056 |
| 1.2E-05 | 4.9E-06 | 0.00053 | 0.00159 | 0.00092 | 0.00072 |
| 1.2E-05 | 0.0001  | 0.00068 | 0.00155 | 0.00103 | 0.00033 |
| 1.2E-05 | 0.0005  | 0.00077 | 0.00113 | 0.0011  | 0.0006  |
| 1.2E-05 | 0.00036 | 0.0007  | 0.00108 | 0.00085 | 0.00089 |
| 1.2E-05 | 0.00089 | 0.00092 | 0.00194 | 0.00135 | 0.00044 |
| 1.2E-05 | 0.00036 | 0.00096 | 0.0016  | 0.0011  | 0.00065 |
| 1.2E-05 | 4.3E-05 | 0.0018  | 0.00224 | 0.00158 | 0.00061 |
| 1.2E-05 | 0.00035 | 0.00158 | 0.00144 | 0.00125 | 0.00061 |
| 1.2E-05 | 0.00047 | 0.00182 | 0.00187 | 0.00027 | 0.00054 |
| 1.2E-05 | 0.00036 | 0.00163 | 0.0012  | 0.00107 | 0.00144 |
| 1.2E-05 | 2E-05   | 0.002   | 0.00187 | 0.00156 | 0.00077 |
| 1.2E-05 | 0.00038 | 0.00127 | 0.00121 | 0.00075 | 0.00101 |
| 1.3E-05 | 0.00053 | 0.0021  | 0.00141 | 0.00169 | 0.00042 |
| 1.3E-05 | 0.00105 | 0.00172 | 0.00187 | 0.00147 | 0.00103 |
| 1.3E-05 | 0.0009  | 0.00114 | 0.00149 | 0.00111 | 0.00111 |
| 1.3E-05 | 0.00028 | 0.00169 | 0.00229 | 0.00099 | 0.00105 |
| 1.3E-05 | 0.00067 | 0.00142 | 0.00188 | 0.00049 | 0.00075 |

|         |         |         |         |         |         |
|---------|---------|---------|---------|---------|---------|
| 1.3E-05 | 0.00061 | 0.00084 | 0.00172 | 0.00043 | 0.0013  |
| 1.3E-05 | 0.00022 | 0.00155 | 0.00181 | 0.0008  | 0.00066 |
| 1.3E-05 | 0.00015 | 0.00166 | 0.00149 | 0.00041 | 0.00062 |
| 1.3E-05 | 0.00052 | 0.00104 | 0.00215 | 0.00086 | 0.00054 |
| 1.3E-05 | 0.0005  | 0.00239 | 0.00199 | 0.00132 | 0.00077 |
| 1.3E-05 | 0.00053 | 0.00153 | 0.00154 | 0.00122 | 0.00075 |
| 1.3E-05 | 0.00057 | 0.00034 | 0.0019  | 0.00108 | 0.001   |
| 1.3E-05 | -1E-05  | 0.00174 | 0.00137 | 0.00119 | 0.00076 |
| 1.3E-05 | 0.00014 | 0.0011  | 0.0016  | 0.00022 | 0.00077 |
| 1.3E-05 | 0.00021 | 0.00135 | 0.00147 | 0.00125 | 0.00054 |
| 1.3E-05 | -0.0001 | 0.00182 | 0.00162 | 0.00125 | 0.00047 |
| 1.3E-05 | 0.00034 | 0.00178 | 0.00129 | 0.0006  | 0.00016 |
| 1.3E-05 | 0.00016 | 0.0017  | 0.00119 | 0.00064 | -0.0003 |
| 1.3E-05 | 0.00083 | 0.00126 | 0.00145 | 0.00066 | 0.00077 |
| 1.3E-05 | 0.00056 | 0.0017  | 0.00078 | 0.00061 | 7.8E-05 |
| 1.3E-05 | -0.0002 | 0.00074 | 0.00181 | 0.00159 | -0.0001 |
| 1.3E-05 | 0.00054 | 0.00045 | 0.00148 | 0.001   | 0.00015 |
| 1.3E-05 | 0.00038 | 0.00136 | 0.00117 | -4E-06  | 0.00037 |
| 1.3E-05 | 0.00013 | 0.00219 | 0.00142 | 0.00033 | 0.00028 |
| 1.3E-05 | -2E-05  | 0.0011  | 0.0013  | 0.00103 | 0.0011  |
| 1.3E-05 | -3E-05  | 0.00176 | 0.00074 | 0.00125 | 0.00102 |
| 1.3E-05 | 0.00024 | 0.00042 | 0.00172 | 0.00075 | 0.00017 |
| 1.3E-05 | -0.0004 | 0.00215 | 0.00067 | 0.00042 | 0.00034 |
| 1.3E-05 | -2E-05  | 0.00091 | 0.00206 | 0.00081 | 0.00056 |
| 1.3E-05 | 0.00042 | 0.00071 | 0.00126 | 0.00113 | 0.00106 |
| 1.3E-05 | 0.00014 | 0.0012  | 0.00179 | 0.00112 | 0.0007  |
| 1.4E-05 | -0.0006 | 0.0011  | 0.00101 | 0.00101 | 0.0007  |
| 1.4E-05 | -1E-05  | 0.00171 | 0.00227 | 0.00081 | 0.0011  |
| 1.4E-05 | -8E-05  | 0.00111 | 0.00092 | 0.00069 | 0.00065 |
| 1.4E-05 | -7E-05  | 0.00152 | 0.00105 | 0.00115 | 0.00057 |
| 1.4E-05 | -0.0004 | 0.00185 | 0.00053 | 0.00145 | 0.00141 |
| 1.4E-05 | 0.00036 | 0.00018 | 0.00121 | 0.0009  | 0.00104 |
| 1.4E-05 | -5E-05  | 0.00205 | 0.00205 | 0.00089 | 0.00078 |
| 1.4E-05 | 0.00039 | 0.00235 | 0.0022  | 0.00045 | 0.00063 |
| 1.4E-05 | -0.0001 | 0.00072 | 0.00177 | 0.00049 | 0.00059 |
| 1.4E-05 | 0.00029 | 0.00062 | 0.0019  | 0.0008  | 0.00048 |
| 1.4E-05 | 0.00039 | 0.00014 | 0.00117 | 0.00087 | 0.00022 |
| 1.4E-05 | 0.00114 | 0.00179 | 0.00092 | 0.00112 | 0.0008  |
| 1.4E-05 | -0.0002 | 0.00083 | 0.00084 | 0.00098 | 0.00073 |
| 1.4E-05 | -0.001  | 0.00186 | 0.00182 | 0.00092 | 0.00019 |
| 1.4E-05 | 0.00063 | 0.00095 | 0.00096 | 0.00013 | 0.0006  |
| 1.4E-05 | 0.00028 | 0.00086 | 0.00125 | 0.00066 | 0.00112 |
| 1.4E-05 | -4E-05  | 0.00187 | 0.00162 | 0.00155 | 0.00042 |
| 1.4E-05 | 0.00075 | 0.00121 | 0.00094 | 0.0012  | 0.00142 |
| 1.4E-05 | -0.0002 | 0.00166 | 0.00152 | 0.00089 | 0.00023 |
| 1.4E-05 | 0.00012 | 0.00121 | 0.00197 | 0.0008  | 0.00108 |
| 1.4E-05 | 0.00047 | 0.00143 | 0.00116 | 0.00086 | -4E-05  |
| 1.4E-05 | 0.00023 | 0.00133 | 0.00087 | 0.00089 | 0.0006  |
| 1.4E-05 | 0.0006  | 0.00091 | 0.00126 | 0.00083 | 0.00043 |
| 1.4E-05 | -0.0004 | 0.00098 | 0.0019  | 0.00092 | 0.00053 |
| 1.4E-05 | 0.00042 | 0.00132 | 0.0005  | 0.00094 | 0.00087 |
| 1.4E-05 | 7.9E-05 | 0.00103 | 0.00171 | 0.00137 | 0.00024 |
| 1.4E-05 | 0.00019 | 0.00104 | 0.00137 | 0.00086 | 0.00046 |
| 1.4E-05 | -1E-04  | 0.00129 | 0.00121 | 0.00106 | 0.00057 |

|         |         |         |         |         |         |
|---------|---------|---------|---------|---------|---------|
| 1.4E-05 | 0.00038 | 0.00055 | 0.00149 | 0.00103 | 0.00088 |
| 1.4E-05 | 0.00017 | 0.0015  | 0.00146 | 0.00069 | 0.00107 |
| 1.4E-05 | 3E-07   | 0.00074 | 0.00148 | 0.00098 | 0.00077 |
| 1.5E-05 | 0.00045 | 0.00217 | 0.00183 | 0.00092 | 0.00087 |
| 1.5E-05 | 0.00046 | 0.00185 | 0.00102 | 0.00121 | 0.00092 |
| 1.5E-05 | 0.00029 | 0.00091 | 0.00125 | 0.00089 | 0.00121 |
| 1.5E-05 | 0.00067 | 0.00104 | 0.00163 | 0.00095 | 0.00085 |
| 1.5E-05 | 0.00028 | 0.0009  | 0.00132 | 0.00068 | 0.00123 |
| 1.5E-05 | 1.7E-05 | 0.00048 | 0.00169 | 0.00083 | 0.00127 |
| 1.5E-05 | -0.0006 | 0.00154 | 0.00158 | 0.00103 | 0.00135 |
| 1.5E-05 | -9E-05  | 0.00176 | 0.0018  | 0.00129 | 9.2E-05 |
| 1.5E-05 | 0.00056 | 0.00131 | 0.002   | 0.00123 | 0.00017 |
| 1.5E-05 | 0.00044 | 0.0013  | 0.00126 | 0.00158 | 0.00089 |
| 1.5E-05 | 0.00031 | 0.00063 | 0.00183 | 0.00067 | 0.00103 |
| 1.5E-05 | 0.00138 | 0.00155 | 0.00145 | 0.00052 | 0.00136 |
| 1.5E-05 | 0.0003  | 0.00149 | 0.00128 | 0.00097 | 0.00056 |
| 1.5E-05 | 0.00049 | 0.00133 | 0.00202 | 0.0011  | 0.00076 |
| 1.5E-05 | 0.00013 | 0.00148 | 0.001   | 0.00084 | 0.00027 |
| 1.5E-05 | 0.00021 | 0.00148 | 0.00158 | 0.0014  | -0.0002 |

**Table SI.14A:** Primary kinetic data for the reaction of 2-imidazolidinone (**S14**) with CumO<sup>•</sup> generated by 355 nm LFP in MeCN (**Figure SI.14A**).

| t / s   | $\Delta A$ 2-imidazolidinone ( <b>S14</b> ) |               |               |               |               |
|---------|---------------------------------------------|---------------|---------------|---------------|---------------|
|         | <b>0.0196M</b>                              | <b>0.049M</b> | <b>0.098M</b> | <b>0.145M</b> | <b>0.196M</b> |
| -1E-06  | -4E-05                                      | -0.0003       | 0.00023       | 0.00063       | 0.00028       |
| -1E-06  | 0.00045                                     | -0.0019       | 8.5E-05       | 0.00162       | 0.00038       |
| -9E-07  | 0.00022                                     | -0.0018       | -0.0009       | 7.7E-05       | 0.00012       |
| -9E-07  | 7.7E-05                                     | -0.0014       | -0.0003       | 0.00076       | 7.7E-05       |
| -9E-07  | 0.0006                                      | -0.0008       | 0.00014       | 0.0003        | 0.00098       |
| -8E-07  | 0.00025                                     | -0.0003       | -0.0006       | 0.00045       | -0.0001       |
| -8E-07  | 0.00022                                     | -0.0018       | -0.0003       | 0.00077       | -0.0003       |
| -8E-07  | 0.00093                                     | -0.0016       | -0.0005       | 0.0021        | -0.0005       |
| -7E-07  | 0.00014                                     | -0.0014       | -0.0004       | 0.00151       | 0.00093       |
| -7E-07  | -2E-05                                      | -0.0012       | -0.0009       | 0.00136       | 0.00034       |
| -7E-07  | 0.00025                                     | -0.0018       | 0.00067       | 0.00145       | 0.00083       |
| -6E-07  | -0.0001                                     | -0.0013       | 0.00019       | 0.00112       | 0.00118       |
| -6E-07  | -8E-05                                      | -0.0016       | -0.0007       | 0.00106       | 0.00082       |
| -6E-07  | 0.00015                                     | -0.0009       | -0.0006       | 0.00211       | 0.00056       |
| -5E-07  | 5.5E-05                                     | -0.001        | -3E-05        | 0.0012        | 0.00077       |
| -5E-07  | 0.00049                                     | -0.0008       | -4E-05        | 0.00088       | 0.00067       |
| -5E-07  | -0.0007                                     | -0.001        | -0.0008       | 0.00044       | -3E-06        |
| -4E-07  | 0.00045                                     | -0.0019       | -0.0003       | 0.00065       | 0.00077       |
| -4E-07  | 0.00079                                     | -0.0016       | -0.0004       | 0.00107       | 0.00077       |
| -4E-07  | 0.0002                                      | -0.0011       | -0.0009       | 0.00161       | 0.0003        |
| -4E-07  | -0.0004                                     | -0.0015       | 3.5E-05       | 0.00131       | 0.00121       |
| -3E-07  | 0.00048                                     | -0.001        | -0.0005       | 0.00032       | 0.00072       |
| -3E-07  | -0.0003                                     | -0.0004       | -0.0003       | 0.00092       | 0.00062       |
| -3E-07  | -0.0009                                     | -0.0013       | 6.3E-05       | 0.00136       | -0.0003       |
| -2E-07  | -5E-05                                      | -0.0009       | -0.0001       | -5E-05        | 0.00116       |
| -2E-07  | -0.0005                                     | -0.0009       | 6.3E-05       | 0.00049       | 0.00113       |
| -2E-07  | -0.0002                                     | -0.0003       | -0.0007       | 0.00076       | 0.00061       |
| -1E-07  | -0.0005                                     | -0.0015       | 6.7E-05       | 0.00133       | 0.00011       |
| -1E-07  | -0.0002                                     | -0.0014       | -0.0004       | 0.00092       | 0.00011       |
| -6E-08  | 0.0003                                      | -0.001        | 8.7E-05       | 0.0006        | -0.0004       |
| -3E-08  | 0.00059                                     | -0.0009       | -0.0005       | 0.00053       | 0.00062       |
| -3E-10  | -0.0027                                     | -0.0035       | -0.0036       | -0.0035       | -0.0025       |
| 3.2E-08 | -0.0016                                     | -0.0023       | -0.0053       | -0.009        | -0.0058       |
| 6.4E-08 | 0.02587                                     | 0.02491       | 0.02273       | 0.02473       | 0.02192       |
| 9.6E-08 | 0.02612                                     | 0.02657       | 0.02454       | 0.02485       | 0.02231       |
| 1.3E-07 | 0.02499                                     | 0.02481       | 0.02308       | 0.02313       | 0.02055       |
| 1.6E-07 | 0.02444                                     | 0.0244        | 0.02166       | 0.02113       | 0.0194        |
| 1.9E-07 | 0.02391                                     | 0.02315       | 0.02088       | 0.02054       | 0.01766       |
| 2.2E-07 | 0.02333                                     | 0.02272       | 0.0203        | 0.01973       | 0.01755       |
| 2.6E-07 | 0.02313                                     | 0.02227       | 0.01827       | 0.01755       | 0.01609       |
| 2.9E-07 | 0.02198                                     | 0.02129       | 0.0167        | 0.01731       | 0.01401       |
| 3.2E-07 | 0.02101                                     | 0.02054       | 0.0163        | 0.01605       | 0.01309       |
| 3.5E-07 | 0.0198                                      | 0.01923       | 0.01606       | 0.01515       | 0.01198       |
| 3.8E-07 | 0.01951                                     | 0.01808       | 0.01427       | 0.01354       | 0.011         |
| 4.2E-07 | 0.01982                                     | 0.01851       | 0.01419       | 0.01348       | 0.01061       |
| 4.5E-07 | 0.01839                                     | 0.01759       | 0.01404       | 0.01287       | 0.01048       |
| 4.8E-07 | 0.01832                                     | 0.01673       | 0.01245       | 0.01152       | 0.00941       |
| 5.1E-07 | 0.01806                                     | 0.01562       | 0.01231       | 0.01132       | 0.00852       |
| 5.4E-07 | 0.01814                                     | 0.01564       | 0.012         | 0.01044       | 0.00843       |



|         |         |         |         |         |         |
|---------|---------|---------|---------|---------|---------|
| 5.8E-07 | 0.01686 | 0.01494 | 0.01105 | 0.00931 | 0.00749 |
| 6.1E-07 | 0.01605 | 0.01406 | 0.01042 | 0.00914 | 0.00818 |
| 6.4E-07 | 0.01595 | 0.01413 | 0.01002 | 0.00882 | 0.00708 |
| 6.7E-07 | 0.01562 | 0.01256 | 0.00964 | 0.00859 | 0.00618 |
| 7E-07   | 0.01493 | 0.01312 | 0.00895 | 0.00843 | 0.00514 |
| 7.4E-07 | 0.01427 | 0.0121  | 0.00891 | 0.00805 | 0.00495 |
| 7.7E-07 | 0.01423 | 0.01141 | 0.00784 | 0.00715 | 0.00456 |
| 8E-07   | 0.01369 | 0.01099 | 0.00794 | 0.00675 | 0.00514 |
| 8.3E-07 | 0.01316 | 0.01059 | 0.00726 | 0.00678 | 0.00482 |
| 8.6E-07 | 0.01315 | 0.01024 | 0.00665 | 0.00639 | 0.00335 |
| 9E-07   | 0.01204 | 0.00993 | 0.00671 | 0.00552 | 0.00327 |
| 9.3E-07 | 0.01192 | 0.00923 | 0.00622 | 0.00586 | 0.00346 |
| 9.6E-07 | 0.01157 | 0.00887 | 0.00555 | 0.00504 | 0.00345 |
| 9.9E-07 | 0.01125 | 0.00843 | 0.00578 | 0.00539 | 0.00291 |
| 1E-06   | 0.01035 | 0.00906 | 0.00479 | 0.00573 | 0.00279 |
| 1.1E-06 | 0.01125 | 0.0083  | 0.00535 | 0.00512 | 0.00255 |
| 1.1E-06 | 0.01046 | 0.00821 | 0.00555 | 0.0043  | 0.0025  |
| 1.1E-06 | 0.00991 | 0.00734 | 0.00488 | 0.00462 | 0.00147 |
| 1.2E-06 | 0.0095  | 0.00723 | 0.00452 | 0.00441 | 0.00158 |
| 1.2E-06 | 0.00927 | 0.00778 | 0.00411 | 0.00397 | 0.0018  |
| 1.2E-06 | 0.00967 | 0.00692 | 0.00383 | 0.00512 | 0.00214 |
| 1.2E-06 | 0.00924 | 0.00655 | 0.00436 | 0.00466 | 0.00166 |
| 1.3E-06 | 0.00833 | 0.00642 | 0.0031  | 0.004   | 0.00197 |
| 1.3E-06 | 0.0082  | 0.00596 | 0.00433 | 0.00371 | 0.0022  |
| 1.3E-06 | 0.00783 | 0.0053  | 0.00405 | 0.00307 | 0.00163 |
| 1.4E-06 | 0.00845 | 0.00553 | 0.00274 | 0.00284 | 0.00155 |
| 1.4E-06 | 0.00793 | 0.00491 | 0.00311 | 0.00267 | 0.00169 |
| 1.4E-06 | 0.00753 | 0.0041  | 0.00283 | 0.00351 | 0.00087 |
| 1.5E-06 | 0.008   | 0.00479 | 0.00333 | 0.0037  | 0.00183 |
| 1.5E-06 | 0.0067  | 0.00442 | 0.00301 | 0.00309 | 0.00125 |
| 1.5E-06 | 0.00796 | 0.00455 | 0.00286 | 0.00347 | 0.00162 |
| 1.6E-06 | 0.00698 | 0.00477 | 0.00221 | 0.00304 | 0.00063 |
| 1.6E-06 | 0.00757 | 0.00422 | 0.00313 | 0.00258 | 0.00115 |
| 1.6E-06 | 0.00644 | 0.0037  | 0.00173 | 0.0034  | 0.00109 |
| 1.7E-06 | 0.00703 | 0.00431 | 0.00237 | 0.00355 | 0.00147 |
| 1.7E-06 | 0.00624 | 0.00426 | 0.00198 | 0.00212 | 0.00092 |
| 1.7E-06 | 0.00561 | 0.00423 | 0.00188 | 0.00225 | 0.00097 |
| 1.8E-06 | 0.00598 | 0.00357 | 0.00286 | 0.00211 | 0.00096 |
| 1.8E-06 | 0.00645 | 0.00398 | 0.00179 | 0.00233 | 0.00171 |
| 1.8E-06 | 0.00621 | 0.00283 | 0.00237 | 0.00212 | 0.00066 |
| 1.9E-06 | 0.00499 | 0.00294 | 0.00158 | 0.00252 | 0.00164 |
| 1.9E-06 | 0.00542 | 0.00277 | 0.00107 | 0.00204 | 0.00118 |
| 1.9E-06 | 0.00537 | 0.00257 | 0.00217 | 0.00292 | 0.00131 |
| 2E-06   | 0.00491 | 0.00272 | 0.00133 | 0.00165 | 0.00057 |
| 2E-06   | 0.00493 | 0.00297 | 0.00145 | 0.00196 | 0.00152 |
| 2E-06   | 0.00488 | 0.00289 | 0.00073 | 0.00182 | 0.0008  |
| 2E-06   | 0.00492 | 0.00241 | 0.00146 | 0.00215 | 0.00106 |
| 2.1E-06 | 0.00467 | 0.00271 | 0.0021  | 0.00254 | 0.00123 |
| 2.1E-06 | 0.004   | 0.00123 | 0.00077 | 0.00276 | 0.0006  |
| 2.1E-06 | 0.0044  | 0.00236 | 0.00056 | 0.00141 | 0.00126 |
| 2.2E-06 | 0.00385 | 0.00212 | 0.00091 | 0.00204 | 0.00087 |
| 2.2E-06 | 0.00402 | 0.00197 | 0.0006  | 0.00135 | 0.00085 |
| 2.2E-06 | 0.00467 | 0.00125 | 0.00062 | 0.00181 | 0.00032 |
| 2.3E-06 | 0.0048  | 0.00163 | 0.00072 | 0.00141 | 0.00115 |

|         |         |         |         |         |         |
|---------|---------|---------|---------|---------|---------|
| 2.3E-06 | 0.00461 | 0.00211 | 0.0008  | 0.00219 | 0.00145 |
| 2.3E-06 | 0.00398 | 0.00179 | 0.001   | 0.00168 | 0.00109 |
| 2.4E-06 | 0.00374 | 0.00135 | 0.00061 | 0.00241 | 0.0016  |
| 2.4E-06 | 0.00341 | 0.001   | 8.2E-05 | 0.00228 | 0.00094 |
| 2.4E-06 | 0.00362 | 0.00065 | 0.00025 | 0.00164 | 0.00111 |
| 2.5E-06 | 0.00351 | 0.00106 | 0.00071 | 0.0015  | 0.00073 |
| 2.5E-06 | 0.00388 | 0.00147 | 0.00092 | 0.00249 | 0.00053 |
| 2.5E-06 | 0.00379 | 0.00126 | 0.00072 | 0.0013  | 0.001   |
| 2.6E-06 | 0.00321 | 0.00155 | 0.0007  | 0.00153 | 0.00043 |
| 2.6E-06 | 0.00329 | 0.00093 | 0.00085 | 0.00155 | 0.00051 |
| 2.6E-06 | 0.00305 | 0.00095 | 0.00112 | 0.00112 | -0.0003 |
| 2.7E-06 | 0.00307 | 0.00123 | 0.00062 | 0.0017  | 0.00077 |
| 2.7E-06 | 0.00392 | -0.0002 | -0.0001 | 0.00164 | 0.00046 |
| 2.7E-06 | 0.00346 | -2E-06  | 0.00117 | 0.00172 | 0.00081 |
| 2.8E-06 | 0.00275 | 0.00082 | 0.00061 | 0.00137 | 0.00091 |
| 2.8E-06 | 0.00297 | 0.00026 | 0.00056 | 0.0022  | 0.00198 |
| 2.8E-06 | 0.00403 | -3E-05  | -0.0001 | 0.00118 | 0.00122 |
| 2.8E-06 | 0.00263 | 0.00019 | 0.00025 | 0.00118 | 0.00104 |
| 2.9E-06 | 0.00213 | -1E-05  | 0.00016 | 0.00101 | 0.00064 |
| 2.9E-06 | 0.00193 | 0.00036 | 0.00103 | 0.00159 | 0.00142 |
| 2.9E-06 | 0.00337 | 0.00036 | 0.00112 | 0.00079 | 0.00087 |
| 3E-06   | 0.00207 | 0.00014 | 0.00024 | 0.00143 | 0.00085 |
| 3E-06   | 0.00286 | 0.00078 | 0.00041 | 0.00198 | 0.0012  |
| 3E-06   | 0.00216 | 0.0003  | 2.6E-05 | 0.00191 | 0.0005  |
| 3.1E-06 | 0.00234 | 4.6E-05 | 0.00127 | 0.00054 | 0.00056 |
| 3.1E-06 | 0.00253 | -8E-05  | 0.00088 | 0.00093 | 0.00066 |
| 3.1E-06 | 0.0016  | 2.4E-05 | -1E-06  | 0.00113 | 0.00113 |
| 3.2E-06 | 0.0019  | 0.00043 | -0.0002 | 0.0014  | 0.00048 |
| 3.2E-06 | 0.00243 | 0.00024 | 0.00013 | 0.00126 | 0.00066 |
| 3.2E-06 | 0.00145 | 0.00078 | 0.00087 | 0.00123 | 0.0011  |
| 3.3E-06 | 0.00179 | -9E-05  | 0.00058 | 0.00142 | 0.00082 |
| 3.3E-06 | 0.00096 | 0.00031 | 0.00025 | 0.00183 | 0.00041 |
| 3.3E-06 | 0.00206 | 0.00053 | 0.00041 | 0.00168 | -0.0001 |
| 3.4E-06 | 0.00239 | 0.00027 | 0.00068 | 0.00041 | 0.00046 |
| 3.4E-06 | 0.00146 | -0.0006 | 2.8E-05 | 0.00182 | 0.00134 |
| 3.4E-06 | 0.0022  | 0.00013 | 0.00045 | 0.00119 | 0.00045 |
| 3.5E-06 | 0.0017  | 0.00025 | 0.00066 | 0.00027 | 0.00051 |
| 3.5E-06 | 0.00224 | -0.0001 | 5E-05   | 0.00083 | 0.00077 |
| 3.5E-06 | 0.00135 | 6.3E-05 | 0.00036 | 0.00225 | 0.00122 |
| 3.6E-06 | 0.00161 | 0.00035 | 0.00059 | 0.00146 | 0.00021 |
| 3.6E-06 | 0.00141 | -0.0002 | 0.00052 | 0.00136 | 0.00128 |
| 3.6E-06 | 0.00222 | 4.3E-05 | -0.0003 | 0.00213 | 0.00043 |
| 3.6E-06 | 0.00236 | 0.00039 | -1E-04  | 0.00172 | 0.00154 |
| 3.7E-06 | 0.00166 | -0.0006 | -0.0002 | 0.00151 | 0.00063 |
| 3.7E-06 | 0.00148 | -0.0008 | -0.0005 | 0.00093 | 0.00031 |
| 3.7E-06 | 0.00082 | -2E-05  | -0.0002 | 0.00112 | 0.00043 |
| 3.8E-06 | 0.00118 | -0.0008 | 0.00067 | 0.00178 | 0.00051 |
| 3.8E-06 | 0.00146 | -0.0008 | 5.3E-05 | 0.00191 | 0.00073 |
| 3.8E-06 | 0.0015  | 8.4E-05 | -0.0001 | 0.00203 | 0.00151 |
| 3.9E-06 | 0.00168 | -0.0007 | -0.0004 | 0.00183 | 0.00049 |
| 3.9E-06 | 0.00106 | -0.0002 | 0.00048 | 0.00165 | 0.00091 |
| 3.9E-06 | 0.00097 | -0.0003 | 0.00048 | 0.00159 | 0.00104 |
| 4E-06   | 0.00127 | -0.0012 | 0.00058 | 0.00161 | 0.00171 |
| 4E-06   | 0.00139 | 0.0004  | 0.00011 | 0.00105 | 0.00068 |

|         |         |         |         |         |         |
|---------|---------|---------|---------|---------|---------|
| 4E-06   | 0.00129 | -0.0002 | 0.00066 | 0.00186 | 0.00037 |
| 4.1E-06 | 0.00176 | -0.0003 | 0.00054 | 0.00097 | 0.0013  |
| 4.1E-06 | 0.00106 | -0.0002 | 0.0002  | 0.00194 | 0.00072 |
| 4.1E-06 | 0.00093 | 0.00022 | 0.00086 | 0.0011  | 0.00078 |
| 4.2E-06 | 0.00096 | 1.3E-05 | -0.0002 | 0.00138 | 0.00033 |
| 4.2E-06 | 3.8E-05 | -0.0004 | 0.00031 | 0.00203 | 0.00041 |
| 4.2E-06 | 0.00132 | -0.0003 | -0.0002 | 0.00166 | 0.00127 |
| 4.3E-06 | 0.00154 | 0.00042 | -0.0003 | 0.00203 | 0.00102 |
| 4.3E-06 | 0.00133 | -0.0005 | 0.00046 | 0.00181 | 0.00094 |
| 4.3E-06 | 0.00082 | -0.0003 | -0.0001 | 0.00226 | 0.00038 |
| 4.4E-06 | 0.00102 | -0.0014 | 4.3E-05 | 0.00059 | -5E-05  |
| 4.4E-06 | 0.00123 | -0.0008 | 0.00013 | 0.00113 | 0.00098 |
| 4.4E-06 | 0.00099 | -0.0015 | 0.00102 | 0.00103 | 2E-05   |
| 4.4E-06 | 0.00115 | -0.0011 | 0.00051 | 0.00152 | 0.00057 |
| 4.5E-06 | 0.00135 | -8E-05  | -0.0002 | 0.00144 | 0.00025 |
| 4.5E-06 | 0.00105 | 0.00048 | 0.00013 | 0.0019  | 0.00068 |
| 4.5E-06 | 0.00121 | -0.0004 | 0.0005  | 0.00127 | 0.00107 |
| 4.6E-06 | 0.00078 | -0.0003 | 0.00048 | 0.00108 | 0.00065 |
| 4.6E-06 | 0.00166 | 0.00022 | 0.00019 | 0.00117 | 0.00158 |
| 4.6E-06 | 0.00074 | 0.00021 | 2.3E-05 | 0.00114 | 0.00084 |
| 4.7E-06 | 0.00084 | 1.1E-05 | -0.0004 | 0.00172 | 0.00075 |
| 4.7E-06 | 0.00079 | -0.0012 | 0.0003  | 0.00095 | 0.00042 |
| 4.7E-06 | 0.00127 | -0.0005 | 3.6E-05 | 0.00121 | 0.00126 |
| 4.8E-06 | 0.00092 | -0.0005 | 0.00032 | 0.00203 | 0.00048 |
| 4.8E-06 | 0.00136 | -0.0004 | 8.9E-05 | 0.00104 | 0.00049 |
| 4.8E-06 | 0.00112 | -0.0006 | 0.00043 | 0.00117 | 0.00114 |
| 4.9E-06 | -9E-05  | -0.0006 | 1.5E-05 | 0.00199 | 0.0013  |
| 4.9E-06 | 0.00128 | -0.0004 | 0.00027 | 0.00168 | 0.00026 |
| 4.9E-06 | 0.00072 | 5.1E-05 | 1.7E-05 | 0.00119 | 0.00065 |
| 5E-06   | 0.00189 | -0.0004 | 0.00017 | 0.00145 | 0.00071 |
| 5E-06   | 0.00167 | -0.0003 | 0.00051 | 0.00133 | 0.001   |
| 5E-06   | 0.00046 | -0.0005 | -0.0004 | 0.00143 | 0.00122 |
| 5.1E-06 | 0.00039 | -0.0003 | -8E-05  | 0.00082 | 0.00022 |
| 5.1E-06 | 0.00053 | -0.0007 | 0.00082 | 0.00055 | 0.00062 |
| 5.1E-06 | 0.00145 | -0.0002 | 0.00021 | 0.00127 | 0.00057 |
| 5.2E-06 | 0.00073 | 0.00067 | 0.00095 | 0.00073 | 0.00027 |
| 5.2E-06 | 0.00048 | -0.0008 | -3E-05  | 0.00191 | 0.00096 |
| 5.2E-06 | 0.00085 | -0.0006 | 4.8E-05 | 0.00143 | 0.0009  |
| 5.2E-06 | 0.00136 | -0.001  | -0.0003 | 0.00121 | 0.00116 |
| 5.3E-06 | 0.00063 | -0.0003 | 0.00011 | 0.00131 | 0.00065 |
| 5.3E-06 | 0.00043 | -0.0003 | 1.2E-05 | 0.00086 | 0.00083 |
| 5.3E-06 | 0.00055 | -0.001  | -0.0003 | 0.00105 | 0.00018 |
| 5.4E-06 | 0.00114 | -0.0012 | 0.00024 | 0.00049 | 0.00028 |
| 5.4E-06 | 0.00093 | -0.0011 | 0.00047 | 0.00068 | 0.00091 |
| 5.4E-06 | 0.00062 | -0.0004 | 0.00034 | 0.00273 | 0.00117 |
| 5.5E-06 | 0.00112 | -0.0005 | -0.0003 | 0.00181 | 0.00074 |
| 5.5E-06 | 0.0005  | -0.0012 | 0.001   | 0.00097 | 0.00041 |
| 5.5E-06 | 0.00085 | -0.0014 | 0.00039 | 0.00158 | 0.0011  |
| 5.6E-06 | 0.00067 | -0.001  | 0.00016 | 0.00183 | 0.00036 |
| 5.6E-06 | 0.00029 | -0.0007 | 7E-05   | 0.00207 | 0.00035 |
| 5.6E-06 | 0.00023 | -0.0007 | -0.0004 | 0.00212 | 0.00064 |
| 5.7E-06 | 0.00028 | 0.0006  | 0.00037 | 0.00223 | 0.00035 |
| 5.7E-06 | 0.00084 | -0.0006 | 0.00036 | 0.00113 | 0.00024 |
| 5.7E-06 | 0.00044 | -0.0004 | 0.0005  | 0.00119 | 0.00057 |

|         |         |         |         |         |         |
|---------|---------|---------|---------|---------|---------|
| 5.8E-06 | 0.00087 | -0.0009 | 0.0001  | 0.00228 | 0.00048 |
| 5.8E-06 | 0.00028 | 1.7E-05 | -2E-05  | 0.00177 | 0.00041 |
| 5.8E-06 | 0.001   | -0.0005 | 0.00051 | 0.00152 | 0.00055 |
| 5.9E-06 | 0.00052 | -0.0008 | 0.0006  | 0.00142 | 0.00094 |
| 5.9E-06 | 0.00061 | -0.0008 | 0.00032 | 0.00122 | 0.00093 |
| 5.9E-06 | 0.00062 | -0.0005 | -0.0005 | 0.0016  | 0.00112 |
| 6E-06   | 0.00096 | -0.0018 | 0.00033 | 0.00184 | 0.00129 |
| 6E-06   | 0.00111 | -0.0007 | 0.00012 | 0.00143 | 0.00073 |
| 6E-06   | -0.0001 | -0.0008 | 0.00058 | 0.00097 | 0.00075 |
| 6E-06   | 0.00076 | -0.0007 | 0.00032 | 0.00082 | 0.0005  |
| 6.1E-06 | 0.00084 | -0.001  | -0.0006 | 0.00071 | 5.7E-05 |
| 6.1E-06 | 0.00059 | -0.0004 | 0.00016 | 0.00237 | 0.00033 |
| 6.1E-06 | 0.00048 | -0.0008 | 7.6E-05 | 0.00143 | 0.00082 |
| 6.2E-06 | 0.00107 | -0.0012 | 0.00039 | 0.00108 | 0.00085 |
| 6.2E-06 | 0.00079 | -0.0013 | -0.0004 | 0.00191 | 0.00058 |
| 6.2E-06 | 0.00124 | -0.0001 | -0.0001 | 0.00139 | 0.00053 |
| 6.3E-06 | 0.00119 | -0.001  | -9E-06  | 0.00094 | 0.00118 |
| 6.3E-06 | 0.00077 | -0.0007 | 0.00057 | 0.0015  | 0.00069 |
| 6.3E-06 | 0.00127 | -1E-05  | 0.00035 | 0.00058 | 0.00145 |
| 6.4E-06 | -0.0003 | 8.9E-05 | 0.00023 | 0.00139 | 0.00126 |
| 6.4E-06 | 0.00135 | -0.0006 | -0.0005 | 0.00148 | 8.4E-05 |
| 6.4E-06 | 0.00053 | -0.0008 | 0.00039 | 0.00168 | 0.00088 |
| 6.5E-06 | 0.00075 | -0.0009 | 0.00037 | 0.00096 | 0.00109 |
| 6.5E-06 | 0.00082 | -0.0004 | -0.0003 | 0.00071 | 0.00113 |
| 6.5E-06 | 0.00074 | -0.0006 | 0.00025 | 0.00114 | 0.0009  |
| 6.6E-06 | 0.00078 | -9E-05  | 4.4E-05 | 0.00103 | 0.00116 |
| 6.6E-06 | 0.00059 | -0.0006 | 5.2E-05 | 0.00141 | 0.00095 |
| 6.6E-06 | 0.00052 | -0.0009 | -8E-05  | 0.00162 | 0.00018 |
| 6.7E-06 | 0.00117 | -0.0003 | 0.00013 | 0.00095 | 0.0006  |
| 6.7E-06 | 0.00071 | -0.0008 | 0.00038 | 0.00108 | 0.00086 |
| 6.7E-06 | 0.0008  | -0.0013 | -0.0002 | 0.0013  | 0.00132 |
| 6.8E-06 | 0.00092 | -0.001  | 0.00027 | 0.00148 | 0.00108 |
| 6.8E-06 | 0.00042 | -0.0003 | 0.00039 | 0.00156 | 0.00035 |
| 6.8E-06 | 0.00063 | -0.0014 | 0.00019 | 0.00191 | 0.00094 |
| 6.8E-06 | 0.00109 | -0.0008 | 0.0005  | 0.00162 | 0.00132 |
| 6.9E-06 | 0.00069 | -0.0007 | 0.00018 | 0.00149 | 0.00142 |
| 6.9E-06 | 0.00074 | -0.0006 | 0.00026 | 0.00241 | 8E-05   |
| 6.9E-06 | 0.00075 | -0.0008 | 0.001   | 0.00118 | 0.00076 |
| 7E-06   | 0.00022 | -0.0002 | 0.00018 | 0.00128 | 0.00088 |
| 7E-06   | 0.00045 | -0.0011 | 2.9E-05 | 0.00163 | 0.00112 |
| 7E-06   | 0.00051 | -0.0007 | 0.00042 | 0.00166 | 0.0005  |
| 7.1E-06 | 0.00069 | 8E-05   | 0.00054 | 0.00128 | 0.00031 |
| 7.1E-06 | 0.00063 | 1.9E-05 | 0.00037 | 0.00091 | 0.0008  |
| 7.1E-06 | 0.00031 | -0.0012 | 6.8E-05 | 0.00049 | 0.00131 |
| 7.2E-06 | 0.00054 | -0.0015 | 5.7E-05 | 0.00062 | 0.00051 |
| 7.2E-06 | 0.00042 | -0.0014 | 0.00012 | 0.00083 | 0.00082 |
| 7.2E-06 | 0.00043 | -0.0005 | 0.00062 | 0.00116 | 0.00064 |
| 7.3E-06 | 0.00076 | -0.0009 | 0.00028 | 0.00173 | 0.00108 |
| 7.3E-06 | 0.00037 | -0.0011 | 1.6E-05 | 0.00156 | 0.00103 |
| 7.3E-06 | 0.00017 | -0.0003 | 0.00034 | 0.00213 | 0.00018 |
| 7.4E-06 | -0.0003 | -0.0007 | 0.00043 | 0.00049 | -9E-05  |
| 7.4E-06 | 0.00151 | -0.0012 | 0.00032 | 0.00156 | 0.0008  |
| 7.4E-06 | 0.00097 | -0.0003 | 0.0006  | 0.00088 | 0.00103 |
| 7.5E-06 | 0.00022 | -0.0013 | 0.00073 | 0.00105 | 0.00076 |

|         |         |         |         |         |         |
|---------|---------|---------|---------|---------|---------|
| 7.5E-06 | 0.00112 | -0.0009 | -1E-05  | 0.00205 | 0.00068 |
| 7.5E-06 | 7.4E-05 | -0.0001 | -6E-05  | 0.00104 | 0.00059 |
| 7.6E-06 | 0.00042 | -0.0006 | 0.00027 | 0.00103 | 0.00117 |
| 7.6E-06 | 0.00108 | -0.0009 | 0.00018 | 0.00105 | 0.00069 |
| 7.6E-06 | 0.00133 | -0.0008 | -0.0001 | 0.00246 | 0.00107 |
| 7.6E-06 | -0.0002 | -0.0015 | 0.0012  | 0.0017  | 0.00036 |
| 7.7E-06 | 0.00069 | -0.0004 | 0.00013 | 0.00093 | 0.00148 |
| 7.7E-06 | 0.00018 | -0.0009 | 0.00053 | 0.00135 | 0.00145 |
| 7.7E-06 | 0.00032 | -0.0011 | -0.0002 | 0.00148 | 0.00045 |
| 7.8E-06 | 0.00115 | -0.0008 | 0.00068 | 0.00124 | 0.00038 |
| 7.8E-06 | 0.00064 | -0.0011 | -0.0002 | 0.00132 | 0.00045 |
| 7.8E-06 | 0.00151 | -0.0014 | 5.2E-05 | 0.00118 | 0.00098 |
| 7.9E-06 | 0.00082 | -0.0011 | -0.0003 | 0.00054 | 0.00094 |
| 7.9E-06 | -0.0001 | -0.0006 | 0.00102 | 0.00167 | 0.00052 |
| 7.9E-06 | -4E-05  | -0.0005 | 0.00099 | 0.00072 | 0.00077 |
| 8E-06   | -0.0003 | -0.0011 | -0.0002 | 0.00169 | 0.00082 |
| 8E-06   | 0.0007  | -0.001  | 0.00067 | 0.00201 | 0.00028 |
| 8E-06   | 0.00051 | -0.0007 | 0.00041 | 0.00051 | 0.00084 |
| 8.1E-06 | 0.00045 | -0.0008 | 0.00034 | 0.00065 | 0.00052 |
| 8.1E-06 | 0.00049 | -0.0004 | 0.00059 | 0.00052 | 0.00116 |
| 8.1E-06 | 0.00018 | -0.0004 | 0.00049 | 0.00076 | 0.00093 |
| 8.2E-06 | 0.00129 | -7E-05  | 0.00081 | 0.00088 | 0.0005  |
| 8.2E-06 | 0.00064 | -0.0007 | 0.00014 | 0.00031 | 0.00111 |
| 8.2E-06 | 0.00069 | -0.0013 | -0.0002 | 0.00153 | 0.00068 |
| 8.3E-06 | 0.00047 | -0.0012 | 0.00039 | 0.00136 | 0.00093 |
| 8.3E-06 | 0.00092 | -0.0009 | 0.00037 | 0.00061 | 0.00029 |
| 8.3E-06 | 0.00014 | -0.0012 | 0.00011 | 0.00065 | 0.00066 |
| 8.4E-06 | 0.00108 | -0.0006 | -5E-05  | 0.00146 | 0.00053 |
| 8.4E-06 | 0.00115 | -0.0007 | -0.0001 | 0.00049 | 0.0003  |
| 8.4E-06 | -0.0002 | -0.0015 | 0.00066 | 0.00145 | 0.00021 |
| 8.4E-06 | 0.00085 | -0.0004 | 0.00012 | 0.00067 | 1E-05   |
| 8.5E-06 | -0.0001 | -0.0007 | -0.0005 | 0.00124 | 0.00091 |
| 8.5E-06 | -0.0001 | -0.0007 | -0.0008 | 0.00098 | 0.00037 |
| 8.5E-06 | 0.00055 | -0.0004 | 0.00018 | 0.00121 | 0.00117 |
| 8.6E-06 | 0.00062 | -0.0009 | -3E-05  | 0.00147 | 0.0011  |
| 8.6E-06 | -0.0001 | -0.0012 | -0.0002 | 0.00129 | 0.00101 |
| 8.6E-06 | 0.00044 | -0.0013 | 0.00065 | 0.00058 | 0.00086 |
| 8.7E-06 | 0.00033 | -0.0009 | 0.0002  | 0.00031 | 0.00096 |
| 8.7E-06 | 0.00073 | -0.0013 | -6E-06  | 0.00173 | 0.00061 |
| 8.7E-06 | 0.00074 | -0.0011 | -0.0002 | 0.00085 | 0.00015 |
| 8.8E-06 | -0.0003 | -0.0007 | -0.0008 | 0.00167 | 0.00074 |
| 8.8E-06 | 0.0004  | -0.0011 | 0.0005  | 0.00186 | 0.00058 |
| 8.8E-06 | 0.00024 | -0.0007 | 0.00052 | 0.00174 | 0.00095 |
| 8.9E-06 | -7E-05  | -0.0012 | 6.6E-05 | 0.00133 | 0.00092 |
| 8.9E-06 | 0.0006  | -0.0009 | 0.0001  | 0.00117 | 0.00082 |
| 8.9E-06 | 0.00094 | -0.0006 | 0.00059 | 0.00088 | 0.0016  |
| 9E-06   | 0.00029 | -0.0009 | 0.00042 | 0.00193 | 0.00109 |
| 9E-06   | 0.00081 | -0.0003 | 0.00012 | 0.00169 | 0.00138 |
| 9E-06   | 0.0005  | -0.0003 | 0.00014 | 0.00089 | 0.0009  |
| 9.1E-06 | 0.0009  | -0.0005 | 0.00075 | 0.00066 | 0.00108 |
| 9.1E-06 | 0.00059 | -0.0012 | 0.00018 | 0.00064 | 0.00117 |
| 9.1E-06 | 0.00025 | 0.00029 | 0.00035 | 0.00086 | 0.00093 |
| 9.2E-06 | 0.00039 | -0.0003 | 0.00012 | 0.00087 | 0.00054 |
| 9.2E-06 | 0.00046 | -0.0008 | 7.8E-05 | 0.0007  | 0.00106 |

|         |         |         |         |         |         |
|---------|---------|---------|---------|---------|---------|
| 9.2E-06 | 0.00039 | -0.0013 | 0.00082 | 0.0002  | 0.00165 |
| 9.2E-06 | 0.00061 | -0.0012 | 0.00054 | 0.00172 | 0.00159 |
| 9.3E-06 | 0.00036 | -0.0002 | -0.0005 | 0.00018 | 0.00138 |
| 9.3E-06 | 0.0004  | -0.0007 | 0.00103 | 0.00127 | 0.00029 |
| 9.3E-06 | 0.00063 | -0.0002 | 0.00081 | 0.00128 | 0.00105 |
| 9.4E-06 | 0.00111 | 5.4E-05 | 0.00025 | 0.00125 | 0.00116 |
| 9.4E-06 | 0.00031 | -0.0006 | 0.00044 | 0.0015  | 0.00077 |
| 9.4E-06 | 0.00036 | -0.0013 | 0.00015 | 0.001   | 0.0007  |
| 9.5E-06 | 4.7E-05 | -0.0001 | 0.00043 | 0.00132 | 0.00043 |
| 9.5E-06 | 0.00014 | -0.001  | -4E-05  | 0.00145 | 0.0003  |
| 9.5E-06 | 0.00107 | -0.001  | -0.001  | 0.00105 | 0.00056 |
| 9.6E-06 | 0.00025 | -0.0006 | 0.0004  | 0.00115 | 0.00114 |
| 9.6E-06 | 0.0004  | -0.0007 | 0.00075 | 0.00156 | 0.00087 |
| 9.6E-06 | 0.0009  | -0.0011 | 0.00015 | 0.00217 | 0.00103 |
| 9.7E-06 | -0.0001 | -0.0007 | -0.0005 | 0.00189 | 0.00137 |
| 9.7E-06 | -0.0001 | -0.001  | 0.0004  | 0.00213 | 0.00091 |
| 9.7E-06 | 0.00068 | -0.0009 | -0.0002 | 0.00197 | 0.00036 |
| 9.8E-06 | 0.00011 | -0.0007 | 0.00021 | 0.00112 | 0.00091 |
| 9.8E-06 | 0.00047 | -0.0011 | 0.00041 | 0.00167 | 0.00038 |
| 9.8E-06 | 0.00055 | -0.0007 | 0.00072 | 0.00142 | 0.00088 |
| 9.9E-06 | 0.00038 | -0.0003 | 0.00096 | 0.00063 | 0.00074 |
| 9.9E-06 | 0.00019 | -0.0004 | 0.00045 | 0.00171 | 0.00061 |
| 9.9E-06 | 0.00032 | -0.0007 | -7E-05  | 0.00191 | 0.00102 |
| 1E-05   | 0.00044 | -0.001  | 0.00131 | 0.00137 | 0.0012  |
| 1E-05   | 0.00101 | -0.001  | 0.00034 | 0.00174 | 0.00088 |
| 1E-05   | 0.00089 | -0.0007 | 0.00029 | 0.00111 | 0.00053 |
| 1E-05   | 0.00074 | 0.00047 | 0.00028 | 0.00035 | 0.0012  |
| 1E-05   | 0.00046 | -0.0011 | 0.00042 | 0.00109 | 0.00118 |
| 1E-05   | 0.00031 | -0.0015 | 0.00126 | 0.00163 | 0.00155 |
| 1E-05   | 0.00078 | -0.0006 | 0.00071 | 0.00168 | 0.00052 |
| 1E-05   | 0.00089 | -0.0014 | -0.0005 | 0.00153 | 0.00087 |
| 1E-05   | 0.00084 | -0.001  | 0.00107 | 0.00171 | 0.00141 |
| 1E-05   | 0.00058 | -0.0015 | 0.0008  | 0.00132 | 0.00091 |
| 1E-05   | 0.00052 | -0.0014 | -0.0001 | 0.00139 | -0.0001 |
| 1E-05   | 0.00078 | -0.0007 | -9E-05  | 0.00078 | 0.00141 |
| 1E-05   | 0.00017 | -0.0011 | 0.00077 | 0.0013  | 0.00156 |
| 1E-05   | 0.00085 | -0.0006 | 0.00013 | 0.00045 | 0.00074 |
| 1E-05   | 0.00104 | -0.0015 | 0.00064 | 0.00123 | 5.8E-05 |
| 1E-05   | -0.0002 | -0.0005 | 0.00012 | 0.0011  | 0.00074 |
| 1E-05   | 0.00055 | -0.0005 | 0.00042 | 0.00049 | 0.00111 |
| 1.1E-05 | 0.00095 | -0.001  | 0.00015 | 0.00083 | 0.00122 |
| 1.1E-05 | 0.00068 | -0.0006 | 0.0003  | 0.00041 | 0.00126 |
| 1.1E-05 | 0.001   | -0.0013 | 0.00064 | 0.00096 | -0.0004 |
| 1.1E-05 | 0.00061 | -0.0011 | 0.0009  | 0.00096 | 0.00099 |
| 1.1E-05 | 0.00052 | -0.0001 | 0.00047 | 5E-05   | -0.0002 |
| 1.1E-05 | 0.00074 | -0.0015 | 0.0012  | 0.00117 | 0.0001  |
| 1.1E-05 | 0.00101 | -0.0016 | -7E-05  | 0.00131 | 0.00086 |
| 1.1E-05 | 9.1E-06 | -0.0003 | 0.00071 | 0.00169 | 0.00096 |
| 1.1E-05 | -9E-05  | -0.0011 | 0.00052 | 0.00151 | 0.00093 |
| 1.1E-05 | 0.00121 | -0.0005 | 0.00063 | 0.00137 | 0.00066 |
| 1.1E-05 | 0.00148 | -0.0005 | 0.00079 | 0.00095 | 0.00143 |
| 1.1E-05 | 0.00083 | -0.001  | -0.0002 | 0.00137 | 0.00056 |
| 1.1E-05 | 0.00099 | -0.0003 | 0.00106 | 0.00107 | 0.00112 |
| 1.1E-05 | 0.00025 | 0.00013 | 0.00101 | 0.00078 | 0.00072 |

|         |         |         |         |         |         |
|---------|---------|---------|---------|---------|---------|
| 1.1E-05 | 0.00059 | 0.00058 | 0.00067 | 0.00109 | 0.00056 |
| 1.1E-05 | 0.00142 | -0.0006 | 0.00067 | 0.00159 | 0.0009  |
| 1.1E-05 | 0.0007  | -0.0004 | -6E-05  | 0.00196 | 0.00064 |
| 1.1E-05 | 0.00064 | -0.0009 | 0.00096 | 0.00184 | 0.00128 |
| 1.1E-05 | 0.00094 | -0.0012 | 0.00132 | 0.00074 | 0.00167 |
| 1.1E-05 | 0.00073 | -0.0005 | 0.00121 | 0.0013  | 0.00115 |
| 1.1E-05 | 0.00121 | -0.0009 | 0.00034 | 0.00138 | 0.0005  |
| 1.1E-05 | 0.00126 | -0.002  | -0.0003 | 0.00118 | 0.00186 |
| 1.1E-05 | 0.00096 | -0.0012 | 0.00039 | 0.00153 | 0.00105 |
| 1.1E-05 | 0.0008  | -0.0008 | 0.00102 | 0.00109 | 0.0012  |
| 1.1E-05 | 0.00144 | -0.0013 | 3.1E-05 | 0.00179 | 0.00114 |
| 1.1E-05 | 0.00083 | -0.0016 | 0.00079 | 0.00108 | 0.00137 |
| 1.1E-05 | 0.00104 | -0.001  | 0.00094 | 0.00107 | 0.00111 |
| 1.1E-05 | -2E-05  | -0.0007 | 0.00027 | 0.00122 | 0.00033 |
| 1.1E-05 | 0.00041 | -0.0006 | 0.0005  | 0.00143 | 0.0006  |
| 1.1E-05 | 0.0003  | -0.0007 | 0.00109 | 0.00173 | 0.00082 |
| 1.1E-05 | 0.00104 | -0.0013 | 0.00102 | 0.00116 | 0.0008  |
| 1.1E-05 | 0.00018 | -0.0005 | -0.0001 | 0.0015  | 0.00072 |
| 1.2E-05 | -0.0001 | -0.0008 | 0.0001  | 0.00153 | 0.00063 |
| 1.2E-05 | 0.00043 | -0.0003 | -5E-05  | 0.00125 | 0.00028 |
| 1.2E-05 | 0.0011  | -0.0008 | 0.00046 | 0.00104 | 0.00096 |
| 1.2E-05 | 0.00049 | -0.001  | 0.00063 | 0.0013  | 0.00102 |
| 1.2E-05 | 0.00105 | -0.0006 | 0.00015 | 0.00214 | 0.00116 |
| 1.2E-05 | 0.0006  | -0.0007 | 0.0004  | 0.00186 | 0.00063 |
| 1.2E-05 | 0.00044 | -0.0007 | 6.6E-06 | 0.00142 | 0.0009  |
| 1.2E-05 | 0.00059 | -0.0011 | 7.9E-05 | 0.00077 | 0.00094 |
| 1.2E-05 | 0.00064 | -0.0012 | 0.00095 | 0.00109 | 0.00013 |
| 1.2E-05 | 0.00105 | -0.0006 | 4.5E-05 | 0.00089 | 0.00145 |
| 1.2E-05 | 4.1E-05 | -0.0005 | 0.00063 | 0.00073 | 0.00174 |
| 1.2E-05 | 0.00056 | -0.0007 | 0.00072 | 0.00113 | 0.00045 |
| 1.2E-05 | 0.00041 | -0.0008 | 0.00032 | 0.0005  | 0.00046 |
| 1.2E-05 | 0.00031 | -0.0009 | 0.00092 | 0.00011 | 0.0003  |
| 1.2E-05 | 0.00067 | -8E-06  | 2E-05   | 0.001   | 0.00045 |
| 1.2E-05 | 0.00025 | -0.0012 | 0.00078 | 0.00113 | 0.00073 |
| 1.2E-05 | 0.0011  | -0.0009 | 0.00043 | 0.00111 | 0.00115 |
| 1.2E-05 | 0.00096 | -0.0011 | 0.00051 | 0.00133 | 0.00087 |
| 1.2E-05 | 0.00013 | -0.0015 | 0.00047 | 0.00094 | 0.00085 |
| 1.2E-05 | 0.00037 | -0.0011 | 0.00137 | 0.0011  | 0.00073 |
| 1.2E-05 | 0.00119 | -0.0007 | 0.00077 | 0.00121 | 0.00062 |
| 1.2E-05 | 0.00032 | -0.0009 | -0.0004 | 0.001   | 0.00061 |
| 1.2E-05 | 0.00085 | -0.0018 | 0.00056 | 0.00134 | 0.0014  |
| 1.2E-05 | -0.0003 | -0.0008 | 0.00034 | 0.00038 | 0.00024 |
| 1.2E-05 | -5E-05  | -0.0001 | 0.00093 | 0.00116 | 0.00107 |
| 1.2E-05 | 0.00023 | -0.0009 | 0.00062 | 0.00149 | 0.00089 |
| 1.2E-05 | 0.00033 | -0.0009 | 9.9E-05 | 0.00103 | 0.00137 |
| 1.2E-05 | 0.00057 | -0.0007 | 9E-05   | 0.00168 | 0.0007  |
| 1.2E-05 | 0.00102 | -0.0014 | 0.00071 | 0.0016  | 0.00196 |
| 1.2E-05 | 0.00026 | -0.0016 | 0.00101 | 0.00161 | 0.00027 |
| 1.2E-05 | 0.00042 | -0.001  | 0.00109 | 0.00149 | 0.00047 |
| 1.3E-05 | 0.00024 | -0.0013 | 0.00094 | 0.0008  | 0.0013  |
| 1.3E-05 | 5.7E-06 | -0.0007 | 0.0004  | 0.00086 | 0.00108 |
| 1.3E-05 | 6.3E-05 | -0.0003 | 0.00036 | 0.00105 | 0.00181 |
| 1.3E-05 | 0.00022 | -0.001  | 0.00041 | 0.00089 | 0.0011  |
| 1.3E-05 | 0.00032 | -0.0013 | 0.00079 | 0.00137 | 0.00126 |

|         |         |         |         |         |         |
|---------|---------|---------|---------|---------|---------|
| 1.3E-05 | 5.2E-05 | -0.0011 | 0.00069 | 0.00133 | -3E-05  |
| 1.3E-05 | 9.2E-05 | -0.001  | 0.00124 | 0.00084 | 0.00108 |
| 1.3E-05 | 0.00111 | -0.0002 | 0.00114 | 0.00103 | 0.00066 |
| 1.3E-05 | 0.00042 | -0.0003 | 0.0012  | 0.00163 | 0.00078 |
| 1.3E-05 | 0.00068 | -0.0014 | 0.00086 | 0.00145 | 0.00083 |
| 1.3E-05 | 0.00104 | -0.0013 | 0.00055 | 0.00164 | 0.00017 |
| 1.3E-05 | 0.00123 | -0.0013 | 0.00095 | 0.00165 | 0.00091 |
| 1.3E-05 | 0.00026 | -0.0007 | 8.1E-05 | 0.00152 | 0.00123 |
| 1.3E-05 | 0.00043 | -0.0012 | 0.00038 | 0.0009  | 0.00076 |
| 1.3E-05 | 0.00011 | -0.0006 | -0.0006 | 0.00068 | 0.00111 |
| 1.3E-05 | 0.00026 | -0.0008 | 0.00021 | 0.00096 | 0.00074 |
| 1.3E-05 | 0.00112 | -0.0007 | 0.00032 | 0.00136 | -0.0002 |
| 1.3E-05 | 0.00088 | -0.0016 | 0.00013 | 0.00125 | 0.00015 |
| 1.3E-05 | 0.00024 | -0.001  | 0.00041 | 0.00156 | 0.00066 |
| 1.3E-05 | 0.00125 | -0.001  | 4.9E-06 | 0.00078 | 0.00111 |
| 1.3E-05 | 0.00108 | -0.0013 | 0.00027 | 0.00118 | 0.00143 |
| 1.3E-05 | 0.0004  | -0.0011 | 0.00056 | 0.00132 | 0.0002  |
| 1.3E-05 | 0.00037 | -0.0009 | 0.00059 | 0.0008  | 0.00082 |
| 1.3E-05 | 0.00081 | -0.0002 | 0.00011 | 0.00119 | 0.00094 |
| 1.3E-05 | 0.00029 | -0.0012 | 1.6E-05 | 0.0011  | 0.00075 |
| 1.3E-05 | 0.00093 | -0.0005 | 0.00032 | 0.00177 | 0.00038 |
| 1.3E-05 | 0.00084 | -0.0011 | 0.00052 | 0.00151 | 0.00149 |
| 1.3E-05 | 0.00117 | -0.0013 | 0.00068 | 0.00147 | 0.00159 |
| 1.3E-05 | 0.00031 | -0.0008 | 0.00038 | 0.00088 | 0.00093 |
| 1.3E-05 | 0.00011 | -0.0007 | -0.0006 | 0.00086 | 0.00057 |
| 1.3E-05 | 0.00014 | -0.0007 | -0.0005 | 0.00147 | 0.00072 |
| 1.4E-05 | 0.00097 | -0.0008 | -0.0002 | 0.00107 | 0.00057 |
| 1.4E-05 | 0.00077 | -0.0006 | -8E-06  | 0.00207 | 0.00045 |
| 1.4E-05 | 0.0006  | -0.0013 | 0.00046 | 0.00153 | 0.00063 |
| 1.4E-05 | 0.00055 | -0.0008 | 0.00038 | 0.00093 | 0.0001  |
| 1.4E-05 | 0.00059 | -0.0005 | 6.6E-05 | 0.00122 | 0.00046 |
| 1.4E-05 | 0.00089 | -0.0003 | -0.0005 | 0.00086 | 0.00096 |
| 1.4E-05 | 0.00076 | -0.0015 | 0.00024 | 0.00071 | 0.00067 |
| 1.4E-05 | 0.0003  | -0.0009 | 0.00065 | 0.0014  | 0.00097 |
| 1.4E-05 | 0.0003  | -0.0008 | 0.00017 | 0.00105 | 0.00071 |
| 1.4E-05 | 0.00094 | -0.0009 | 0.00026 | 0.00181 | 5.6E-05 |
| 1.4E-05 | 0.00017 | -0.0009 | -0.0002 | 0.00116 | 0.00116 |
| 1.4E-05 | -8E-05  | -1E-04  | 0.0002  | 0.00105 | 0.00089 |
| 1.4E-05 | 0.00032 | -0.0006 | 0.00049 | 0.00154 | 0.00161 |
| 1.4E-05 | 0.001   | -0.0009 | 0.00067 | 0.00104 | 0.00054 |
| 1.4E-05 | 0.00078 | -0.0005 | 0.00071 | 0.00089 | 0.00088 |
| 1.4E-05 | 0.00049 | -0.0013 | 0.00093 | 0.00118 | 0.00098 |
| 1.4E-05 | 0.00061 | -0.0011 | 0.00069 | 0.00142 | 0.00052 |
| 1.4E-05 | -0.0002 | -0.001  | 0.00049 | 0.0016  | 0.00072 |
| 1.4E-05 | 0.00087 | -0.0005 | 0.00013 | 0.00093 | 0.00068 |
| 1.4E-05 | 0.0007  | -0.0009 | 0.00031 | 0.00119 | 0.00047 |
| 1.4E-05 | 0.00079 | -0.0003 | 0.00041 | 0.0009  | 0.00055 |
| 1.4E-05 | 0.00106 | -0.0007 | 0.00075 | 0.00101 | 0.00097 |
| 1.4E-05 | 0.00055 | -0.0011 | 0.0001  | 0.00153 | 0.0007  |
| 1.4E-05 | 0.00061 | -0.0013 | 0.00027 | 0.00148 | 0.0006  |
| 1.4E-05 | 0.00084 | -0.0009 | 0.00041 | 0.00082 | 0.00124 |
| 1.4E-05 | 0.00128 | -0.0005 | 7.7E-07 | 0.00076 | 0.00045 |
| 1.4E-05 | 0.00058 | -0.0004 | 0.00049 | 0.00105 | 0.00147 |
| 1.4E-05 | 0.00097 | -0.0006 | 0.0003  | 0.00142 | 0.00035 |



|         |         |         |         |         |         |
|---------|---------|---------|---------|---------|---------|
| 1.4E-05 | 0.00104 | -0.0001 | -0.0004 | 0.00118 | 0.00067 |
| 1.4E-05 | 0.00032 | -0.001  | 3.6E-05 | 0.00133 | 0.00153 |
| 1.4E-05 | 0.00034 | -0.0011 | -0.0008 | 0.0002  | 0.00093 |
| 1.5E-05 | 0.00042 | -0.0011 | 0.00067 | 0.00115 | 0.00024 |
| 1.5E-05 | 0.00011 | -0.0018 | 0.00026 | 0.00129 | 0.00047 |
| 1.5E-05 | 0.00026 | -0.0005 | -8E-06  | 0.00165 | 0.00038 |
| 1.5E-05 | 0.00168 | 7.2E-05 | 0.00049 | 0.00136 | 0.00063 |
| 1.5E-05 | 0.00046 | -0.0009 | 0.00037 | 0.00127 | 0.00094 |
| 1.5E-05 | 0.00027 | -0.0009 | -1E-05  | 0.00113 | 0.00082 |
| 1.5E-05 | 0.00051 | -0.0009 | 0.0004  | 0.00117 | 0.00099 |
| 1.5E-05 | 0.00132 | -0.0012 | 0.00023 | 0.00104 | 0.00011 |
| 1.5E-05 | 0.00069 | -0.0006 | 0.00076 | 0.00083 | 0.00115 |
| 1.5E-05 | 0.001   | -0.0003 | 0.00049 | 0.00103 | 0.00101 |
| 1.5E-05 | 0.00118 | -0.0008 | 0.00048 | 0.00137 | 0.00118 |
| 1.5E-05 | -5E-05  | -0.0011 | 0.00069 | 0.00068 | 1.7E-05 |
| 1.5E-05 | -0.0003 | -0.0012 | 0.00081 | 0.00139 | 0.00079 |
| 1.5E-05 | 0.00028 | -0.0008 | 0.00103 | 0.00075 | 0.00103 |
| 1.5E-05 | 0.00021 | -0.0012 | -0.0008 | 0.0014  | 0.00041 |
| 1.5E-05 | 0.00096 | -0.0009 | -0.0003 | 0.00132 | 0.00072 |

**Table SI.14B:** Primary kinetic data for the reaction of 2-imidazolidinone (S14) with CumO• generated by 355 nm LFP in DMSO (**Figure SI.14B**).

| t / s     | $\Delta A$ 2-imidazolidinone (S14) |           |           |           |           |
|-----------|------------------------------------|-----------|-----------|-----------|-----------|
|           | 0.075 M                            | 0.056 M   | 0.0375 M  | 0.025 M   | 0.0075 M  |
| -9.92E-07 | -5.46E-04                          | -2.95E-04 | 1.09E-04  | -2.99E-06 | -4.48E-05 |
| -9.60E-07 | -2.28E-04                          | -5.05E-04 | -1.35E-04 | 3.60E-04  | -3.66E-04 |
| -9.28E-07 | 4.98E-05                           | -4.62E-04 | -5.24E-05 | 2.89E-04  | 1.20E-04  |
| -8.96E-07 | -6.07E-04                          | -2.98E-04 | 5.57E-04  | 1.49E-04  | -7.88E-04 |
| -8.64E-07 | -4.82E-04                          | -3.67E-04 | 2.59E-04  | 5.58E-04  | -5.51E-04 |
| -8.32E-07 | 1.30E-04                           | -3.14E-04 | 3.04E-04  | 2.26E-04  | -1.84E-04 |
| -8.00E-07 | 2.60E-04                           | -3.27E-04 | -7.37E-04 | 6.20E-04  | 4.35E-05  |
| -7.68E-07 | 2.47E-04                           | -6.04E-04 | 2.99E-04  | 6.79E-04  | -3.86E-04 |
| -7.36E-07 | -4.29E-04                          | -3.75E-04 | -5.59E-05 | 5.15E-05  | -3.28E-04 |
| -7.04E-07 | -3.64E-05                          | -3.87E-04 | 2.61E-04  | 5.55E-05  | -1.94E-04 |
| -6.72E-07 | -2.46E-04                          | -3.72E-04 | 4.93E-04  | 2.17E-04  | -3.35E-04 |
| -6.40E-07 | -6.04E-04                          | -5.58E-04 | 9.11E-04  | 5.05E-04  | -2.82E-04 |
| -6.08E-07 | -1.93E-04                          | -4.57E-04 | 4.74E-04  | 9.55E-04  | -3.23E-04 |
| -5.76E-07 | -5.19E-04                          | -5.65E-04 | 9.45E-05  | 5.62E-04  | -6.55E-05 |
| -5.44E-07 | -5.38E-04                          | -3.25E-04 | 4.81E-04  | 2.79E-04  | -1.95E-04 |
| -5.12E-07 | -2.19E-04                          | -3.72E-04 | 1.82E-04  | 5.27E-04  | -2.22E-04 |
| -4.80E-07 | -3.08E-04                          | -4.70E-04 | -2.42E-04 | 7.09E-04  | -1.09E-04 |
| -4.48E-07 | -3.52E-04                          | -3.98E-04 | -3.31E-04 | 5.53E-04  | 7.53E-05  |
| -4.16E-07 | 2.36E-04                           | -3.22E-04 | -6.90E-05 | 2.42E-04  | 3.17E-04  |
| -3.84E-07 | -2.87E-04                          | -2.38E-05 | 1.13E-04  | 3.88E-04  | -8.08E-04 |
| -3.52E-07 | -3.98E-04                          | -2.37E-04 | 4.35E-04  | -2.30E-04 | -4.19E-04 |
| -3.20E-07 | -6.27E-04                          | -5.05E-05 | -3.07E-04 | -4.22E-04 | -4.09E-04 |
| -2.88E-07 | -5.22E-04                          | -2.77E-04 | -1.17E-04 | 4.81E-04  | -1.79E-04 |
| -2.56E-07 | -6.46E-04                          | -3.77E-04 | 5.53E-04  | 4.62E-04  | -6.02E-04 |
| -2.24E-07 | -1.24E-03                          | -3.28E-04 | -4.91E-05 | 4.38E-04  | -8.26E-04 |
| -1.92E-07 | -6.14E-04                          | -8.19E-04 | 1.49E-04  | 1.45E-04  | -6.07E-04 |
| -1.60E-07 | -8.95E-04                          | -7.01E-04 | 4.22E-04  | 2.14E-04  | -7.33E-04 |
| -1.28E-07 | 1.25E-04                           | -6.77E-04 | 4.70E-04  | 1.63E-04  | -5.51E-04 |
| -9.64E-08 | -3.85E-04                          | -8.34E-04 | 2.67E-04  | 4.51E-04  | -2.40E-04 |
| -6.44E-08 | -6.62E-04                          | -5.42E-04 | 2.35E-04  | -1.09E-04 | -1.06E-04 |
| -3.24E-08 | -4.96E-04                          | -6.29E-04 | 4.37E-05  | 9.80E-05  | -1.11E-04 |
| -3.75E-10 | -3.75E-03                          | -2.91E-03 | -2.34E-03 | -2.69E-03 | -3.13E-03 |
| 3.16E-08  | -1.53E-02                          | -1.03E-02 | -9.54E-03 | -1.19E-02 | -8.93E-03 |
| 6.36E-08  | 1.07E-02                           | 1.13E-02  | 1.33E-02  | 1.40E-02  | 1.44E-02  |
| 9.56E-08  | 1.20E-02                           | 1.30E-02  | 1.45E-02  | 1.51E-02  | 1.44E-02  |
| 1.28E-07  | 1.15E-02                           | 1.24E-02  | 1.45E-02  | 1.37E-02  | 1.48E-02  |
| 1.60E-07  | 1.10E-02                           | 1.14E-02  | 1.28E-02  | 1.35E-02  | 1.44E-02  |
| 1.92E-07  | 1.03E-02                           | 1.06E-02  | 1.24E-02  | 1.35E-02  | 1.40E-02  |
| 2.24E-07  | 9.30E-03                           | 1.02E-02  | 1.17E-02  | 1.26E-02  | 1.38E-02  |
| 2.56E-07  | 8.87E-03                           | 9.57E-03  | 1.20E-02  | 1.19E-02  | 1.33E-02  |
| 2.88E-07  | 8.18E-03                           | 8.49E-03  | 1.15E-02  | 1.17E-02  | 1.28E-02  |
| 3.20E-07  | 7.77E-03                           | 8.04E-03  | 1.07E-02  | 1.18E-02  | 1.28E-02  |
| 3.52E-07  | 7.40E-03                           | 7.58E-03  | 1.01E-02  | 1.15E-02  | 1.19E-02  |
| 3.84E-07  | 6.53E-03                           | 7.53E-03  | 9.53E-03  | 1.06E-02  | 1.18E-02  |
| 4.16E-07  | 5.84E-03                           | 7.07E-03  | 8.85E-03  | 9.75E-03  | 1.12E-02  |
| 4.48E-07  | 5.39E-03                           | 6.39E-03  | 9.22E-03  | 1.00E-02  | 1.08E-02  |
| 4.80E-07  | 4.98E-03                           | 5.91E-03  | 8.07E-03  | 8.89E-03  | 1.12E-02  |
| 5.12E-07  | 5.26E-03                           | 5.65E-03  | 8.23E-03  | 8.79E-03  | 1.02E-02  |
| 5.44E-07  | 4.99E-03                           | 5.76E-03  | 7.37E-03  | 8.93E-03  | 1.09E-02  |

|          |           |           |          |          |          |
|----------|-----------|-----------|----------|----------|----------|
| 5.76E-07 | 3.44E-03  | 5.45E-03  | 6.56E-03 | 7.98E-03 | 9.44E-03 |
| 6.08E-07 | 3.45E-03  | 5.15E-03  | 6.28E-03 | 7.69E-03 | 9.05E-03 |
| 6.40E-07 | 3.46E-03  | 4.76E-03  | 6.16E-03 | 7.83E-03 | 9.29E-03 |
| 6.72E-07 | 3.36E-03  | 4.97E-03  | 6.50E-03 | 7.52E-03 | 9.18E-03 |
| 7.04E-07 | 2.68E-03  | 4.02E-03  | 6.12E-03 | 7.12E-03 | 8.49E-03 |
| 7.36E-07 | 2.93E-03  | 3.76E-03  | 5.95E-03 | 6.31E-03 | 8.20E-03 |
| 7.68E-07 | 2.64E-03  | 3.16E-03  | 5.42E-03 | 6.97E-03 | 7.92E-03 |
| 8.00E-07 | 2.72E-03  | 2.90E-03  | 5.41E-03 | 6.05E-03 | 8.38E-03 |
| 8.32E-07 | 2.26E-03  | 2.56E-03  | 4.73E-03 | 6.15E-03 | 7.44E-03 |
| 8.64E-07 | 2.01E-03  | 2.61E-03  | 4.77E-03 | 5.90E-03 | 7.19E-03 |
| 8.96E-07 | 1.62E-03  | 2.65E-03  | 4.31E-03 | 5.61E-03 | 7.22E-03 |
| 9.28E-07 | 1.34E-03  | 2.08E-03  | 3.93E-03 | 5.44E-03 | 7.17E-03 |
| 9.60E-07 | 1.22E-03  | 2.61E-03  | 4.18E-03 | 5.25E-03 | 7.08E-03 |
| 9.92E-07 | 1.10E-03  | 2.21E-03  | 4.25E-03 | 5.11E-03 | 6.76E-03 |
| 1.02E-06 | 1.20E-03  | 1.79E-03  | 3.83E-03 | 5.34E-03 | 6.45E-03 |
| 1.06E-06 | 1.77E-03  | 1.80E-03  | 3.51E-03 | 4.44E-03 | 6.81E-03 |
| 1.09E-06 | 1.26E-03  | 1.66E-03  | 3.73E-03 | 4.39E-03 | 6.01E-03 |
| 1.12E-06 | 1.25E-03  | 1.74E-03  | 4.13E-03 | 4.20E-03 | 6.28E-03 |
| 1.15E-06 | 1.38E-03  | 1.35E-03  | 2.95E-03 | 4.10E-03 | 6.05E-03 |
| 1.18E-06 | 1.25E-03  | 1.02E-03  | 2.92E-03 | 3.85E-03 | 6.07E-03 |
| 1.22E-06 | 6.19E-04  | 1.36E-03  | 2.97E-03 | 4.37E-03 | 5.63E-03 |
| 1.25E-06 | 1.45E-03  | 1.54E-03  | 2.14E-03 | 3.35E-03 | 4.79E-03 |
| 1.28E-06 | 1.08E-03  | 1.39E-03  | 2.05E-03 | 4.15E-03 | 5.48E-03 |
| 1.31E-06 | 7.87E-04  | 1.19E-03  | 2.48E-03 | 3.40E-03 | 5.36E-03 |
| 1.34E-06 | 9.52E-04  | 1.29E-03  | 2.38E-03 | 3.37E-03 | 5.14E-03 |
| 1.38E-06 | 8.56E-04  | 1.05E-03  | 2.51E-03 | 3.74E-03 | 5.02E-03 |
| 1.41E-06 | 7.74E-04  | 6.13E-04  | 2.39E-03 | 3.49E-03 | 4.86E-03 |
| 1.44E-06 | 8.86E-04  | 6.29E-04  | 2.74E-03 | 2.70E-03 | 4.64E-03 |
| 1.47E-06 | 1.06E-03  | 9.43E-04  | 2.18E-03 | 3.25E-03 | 4.84E-03 |
| 1.50E-06 | 3.53E-04  | 8.79E-04  | 2.09E-03 | 3.18E-03 | 4.87E-03 |
| 1.54E-06 | 7.72E-05  | 1.08E-03  | 1.49E-03 | 3.30E-03 | 4.10E-03 |
| 1.57E-06 | 6.21E-04  | 7.93E-04  | 1.72E-03 | 2.69E-03 | 3.88E-03 |
| 1.60E-06 | 9.81E-04  | 4.34E-04  | 1.82E-03 | 3.01E-03 | 3.69E-03 |
| 1.63E-06 | 1.87E-04  | 5.41E-04  | 1.23E-03 | 2.88E-03 | 3.92E-03 |
| 1.66E-06 | 7.60E-04  | 3.34E-04  | 1.75E-03 | 2.02E-03 | 3.89E-03 |
| 1.70E-06 | 5.76E-04  | 1.55E-04  | 1.75E-03 | 2.42E-03 | 3.25E-03 |
| 1.73E-06 | 8.84E-04  | 6.93E-04  | 1.61E-03 | 1.97E-03 | 3.47E-03 |
| 1.76E-06 | 3.64E-04  | -5.59E-05 | 1.80E-03 | 2.03E-03 | 3.64E-03 |
| 1.79E-06 | 5.35E-04  | 1.87E-04  | 1.58E-03 | 1.44E-03 | 3.62E-03 |
| 1.82E-06 | -3.78E-05 | 6.31E-04  | 1.36E-03 | 1.57E-03 | 3.76E-03 |
| 1.86E-06 | -5.73E-05 | 2.46E-04  | 1.53E-03 | 2.11E-03 | 3.45E-03 |
| 1.89E-06 | 5.42E-04  | 2.42E-04  | 1.81E-03 | 1.69E-03 | 3.65E-03 |
| 1.92E-06 | -3.79E-04 | 9.67E-05  | 1.13E-03 | 1.86E-03 | 3.30E-03 |
| 1.95E-06 | 2.65E-04  | 5.61E-04  | 1.27E-03 | 1.53E-03 | 3.10E-03 |
| 1.98E-06 | 1.11E-03  | 5.79E-04  | 1.45E-03 | 1.65E-03 | 3.35E-03 |
| 2.02E-06 | 4.88E-04  | 2.57E-04  | 1.37E-03 | 1.53E-03 | 3.25E-03 |
| 2.05E-06 | 4.60E-04  | 8.21E-04  | 1.40E-03 | 1.84E-03 | 3.20E-03 |
| 2.08E-06 | 1.37E-04  | 4.55E-04  | 1.65E-03 | 1.38E-03 | 3.25E-03 |
| 2.11E-06 | -5.15E-05 | 7.00E-05  | 1.41E-03 | 1.55E-03 | 3.03E-03 |
| 2.14E-06 | -1.19E-05 | 3.68E-05  | 1.91E-03 | 1.44E-03 | 2.81E-03 |
| 2.18E-06 | -5.35E-05 | 2.88E-04  | 1.62E-03 | 1.78E-03 | 2.89E-03 |
| 2.21E-06 | 1.02E-04  | 1.89E-05  | 1.33E-03 | 1.34E-03 | 3.35E-03 |
| 2.24E-06 | 5.54E-05  | 6.88E-05  | 1.06E-03 | 1.17E-03 | 2.61E-03 |
| 2.27E-06 | -4.51E-05 | -2.41E-04 | 1.26E-03 | 1.25E-03 | 2.39E-03 |

|          |           |           |          |          |          |
|----------|-----------|-----------|----------|----------|----------|
| 2.30E-06 | -5.56E-04 | 3.16E-04  | 1.40E-03 | 1.04E-03 | 2.56E-03 |
| 2.34E-06 | 3.55E-04  | -2.55E-04 | 1.11E-03 | 1.16E-03 | 2.80E-03 |
| 2.37E-06 | -1.29E-04 | 1.90E-04  | 1.36E-03 | 1.33E-03 | 2.75E-03 |
| 2.40E-06 | -4.78E-04 | 1.82E-04  | 9.34E-04 | 1.72E-03 | 2.93E-03 |
| 2.43E-06 | -1.36E-04 | 3.32E-04  | 1.50E-03 | 1.49E-03 | 2.41E-03 |
| 2.46E-06 | 4.49E-04  | 3.19E-04  | 1.99E-03 | 8.77E-04 | 2.62E-03 |
| 2.50E-06 | -1.17E-06 | 4.08E-04  | 9.23E-04 | 1.46E-03 | 2.26E-03 |
| 2.53E-06 | 2.88E-04  | 2.89E-04  | 1.30E-03 | 8.01E-04 | 2.54E-03 |
| 2.56E-06 | 1.28E-04  | -4.07E-05 | 3.98E-04 | 1.17E-03 | 1.72E-03 |
| 2.59E-06 | 1.56E-04  | 5.80E-04  | 1.10E-03 | 9.70E-04 | 2.41E-03 |
| 2.62E-06 | -2.34E-04 | 6.46E-05  | 9.52E-04 | 9.34E-04 | 2.80E-03 |
| 2.66E-06 | 3.24E-04  | -1.11E-04 | 8.69E-04 | 1.48E-03 | 2.30E-03 |
| 2.69E-06 | -7.46E-04 | -1.59E-06 | 9.76E-04 | 8.58E-04 | 2.14E-03 |
| 2.72E-06 | -6.16E-04 | -4.94E-05 | 7.87E-04 | 9.63E-04 | 2.46E-03 |
| 2.75E-06 | -2.15E-04 | 1.11E-04  | 7.25E-04 | 7.31E-04 | 2.26E-03 |
| 2.78E-06 | -1.51E-04 | 8.93E-05  | 7.11E-04 | 1.14E-03 | 1.97E-03 |
| 2.82E-06 | -1.75E-04 | -1.58E-05 | 1.35E-03 | 1.75E-03 | 1.86E-03 |
| 2.85E-06 | 1.06E-04  | 3.71E-05  | 3.82E-04 | 1.03E-03 | 2.28E-03 |
| 2.88E-06 | -2.74E-04 | 5.40E-04  | 4.21E-04 | 8.78E-04 | 1.72E-03 |
| 2.91E-06 | 2.44E-04  | 7.65E-05  | 4.31E-04 | 7.43E-04 | 1.89E-03 |
| 2.94E-06 | -4.15E-05 | -3.31E-04 | 6.75E-04 | 8.81E-04 | 1.55E-03 |
| 2.98E-06 | 5.65E-05  | -5.80E-05 | 7.53E-04 | 8.35E-04 | 1.71E-03 |
| 3.01E-06 | -5.66E-04 | -1.19E-04 | 1.52E-03 | 7.72E-04 | 1.98E-03 |
| 3.04E-06 | -1.26E-04 | -8.15E-05 | 6.92E-04 | 8.31E-04 | 1.84E-03 |
| 3.07E-06 | -5.36E-04 | 2.64E-05  | 5.02E-04 | 5.16E-04 | 8.99E-04 |
| 3.10E-06 | 4.16E-04  | 1.11E-04  | 8.14E-04 | 4.23E-04 | 1.98E-03 |
| 3.14E-06 | -3.89E-04 | -5.82E-05 | 7.77E-04 | 1.05E-03 | 2.00E-03 |
| 3.17E-06 | 1.55E-04  | -2.76E-04 | 7.25E-04 | 9.31E-04 | 1.94E-03 |
| 3.20E-06 | -3.82E-04 | 2.45E-05  | 8.69E-04 | 1.27E-03 | 1.56E-03 |
| 3.23E-06 | -2.30E-04 | -3.65E-04 | 6.57E-04 | 8.28E-04 | 1.46E-03 |
| 3.26E-06 | 4.24E-05  | 1.49E-04  | 6.64E-04 | 7.08E-04 | 1.95E-03 |
| 3.30E-06 | -5.62E-04 | 3.16E-04  | 1.15E-03 | 8.91E-04 | 1.04E-03 |
| 3.33E-06 | -2.07E-05 | -7.42E-04 | 5.65E-04 | 8.06E-04 | 1.75E-03 |
| 3.36E-06 | -2.64E-04 | -5.21E-04 | 1.05E-03 | 3.38E-04 | 1.53E-03 |
| 3.39E-06 | -4.61E-04 | -2.48E-05 | 8.27E-04 | 9.65E-04 | 1.39E-03 |
| 3.42E-06 | -4.10E-04 | -3.39E-04 | 9.97E-04 | 6.87E-04 | 9.97E-04 |
| 3.46E-06 | 1.72E-04  | -4.89E-04 | 6.09E-04 | 8.37E-04 | 1.53E-03 |
| 3.49E-06 | -7.11E-04 | 5.54E-06  | 7.29E-04 | 9.46E-04 | 1.04E-03 |
| 3.52E-06 | 4.00E-04  | 7.46E-05  | 5.17E-04 | 9.76E-04 | 1.23E-03 |
| 3.55E-06 | 1.10E-05  | 1.38E-04  | 3.36E-04 | 1.08E-03 | 1.14E-03 |
| 3.58E-06 | -5.89E-05 | -4.64E-04 | 4.88E-04 | 3.58E-04 | 9.87E-04 |
| 3.62E-06 | -2.62E-04 | -6.10E-05 | 4.03E-04 | 4.64E-04 | 1.25E-03 |
| 3.65E-06 | -6.17E-05 | 1.23E-04  | 3.00E-04 | 8.57E-04 | 1.26E-03 |
| 3.68E-06 | 6.14E-05  | -2.91E-04 | 1.36E-03 | 2.45E-04 | 1.11E-03 |
| 3.71E-06 | -3.26E-04 | -1.31E-04 | 6.47E-04 | 6.90E-04 | 1.72E-03 |
| 3.74E-06 | 2.51E-04  | -5.13E-04 | 9.49E-04 | 2.46E-04 | 5.00E-04 |
| 3.78E-06 | -3.48E-04 | -1.09E-04 | 9.78E-04 | 2.81E-04 | 1.21E-03 |
| 3.81E-06 | -4.74E-04 | -2.54E-04 | 1.43E-04 | 3.34E-04 | 1.42E-03 |
| 3.84E-06 | -2.62E-04 | 6.88E-05  | 5.59E-04 | 8.04E-04 | 9.56E-04 |
| 3.87E-06 | -3.89E-04 | -3.18E-04 | 7.53E-04 | 9.63E-04 | 4.24E-04 |
| 3.90E-06 | -4.44E-05 | -5.13E-04 | 8.34E-04 | 7.43E-04 | 1.11E-03 |
| 3.94E-06 | -3.78E-04 | -1.71E-04 | 9.21E-04 | 6.78E-04 | 9.52E-04 |
| 3.97E-06 | -1.82E-04 | -1.29E-04 | 9.77E-04 | 1.04E-03 | 1.08E-03 |
| 4.00E-06 | -6.94E-05 | -3.02E-04 | 9.00E-04 | 8.12E-04 | 1.21E-03 |

|          |           |           |          |           |          |
|----------|-----------|-----------|----------|-----------|----------|
| 4.03E-06 | 4.06E-05  | -5.74E-04 | 1.07E-03 | 6.35E-04  | 6.00E-04 |
| 4.06E-06 | -6.35E-04 | -5.98E-04 | 4.85E-04 | 7.63E-04  | 1.23E-03 |
| 4.10E-06 | -4.59E-04 | -2.70E-04 | 5.54E-04 | 6.94E-04  | 1.04E-03 |
| 4.13E-06 | -6.02E-04 | -2.17E-04 | 4.64E-04 | 9.86E-04  | 1.14E-03 |
| 4.16E-06 | -1.76E-04 | 3.61E-05  | 4.20E-04 | 5.92E-04  | 9.78E-04 |
| 4.19E-06 | -7.19E-04 | 1.39E-04  | 1.16E-04 | 3.43E-05  | 1.32E-03 |
| 4.22E-06 | -2.03E-04 | -3.80E-04 | 4.83E-04 | 7.26E-04  | 1.03E-03 |
| 4.26E-06 | -7.11E-04 | -2.99E-04 | 3.53E-04 | 6.22E-04  | 1.08E-03 |
| 4.29E-06 | -3.07E-04 | -3.27E-04 | 4.54E-04 | 1.87E-04  | 9.20E-04 |
| 4.32E-06 | -4.49E-04 | -5.15E-04 | 2.75E-04 | 5.13E-04  | 1.43E-03 |
| 4.35E-06 | -2.18E-04 | 5.54E-06  | 4.25E-04 | 2.39E-04  | 1.03E-03 |
| 4.38E-06 | -5.92E-04 | -2.84E-04 | 6.30E-04 | 2.24E-04  | 9.77E-04 |
| 4.42E-06 | -9.14E-05 | -4.39E-04 | 8.72E-04 | 9.39E-04  | 1.88E-03 |
| 4.45E-06 | -4.20E-04 | -2.65E-04 | 7.81E-04 | 9.32E-04  | 1.08E-03 |
| 4.48E-06 | -9.29E-05 | -4.96E-04 | 2.00E-04 | 1.06E-03  | 1.26E-03 |
| 4.51E-06 | -1.25E-04 | 7.02E-05  | 5.49E-04 | 1.26E-03  | 1.24E-03 |
| 4.54E-06 | 2.61E-04  | -9.92E-05 | 7.71E-04 | 5.46E-04  | 1.07E-03 |
| 4.58E-06 | 4.29E-05  | -4.47E-04 | 1.42E-04 | 6.21E-04  | 1.14E-03 |
| 4.61E-06 | -2.71E-04 | -7.21E-05 | 7.09E-04 | 3.69E-04  | 6.91E-04 |
| 4.64E-06 | 3.23E-05  | -2.07E-04 | 8.98E-04 | 8.98E-04  | 9.19E-04 |
| 4.67E-06 | -8.96E-05 | -3.96E-04 | 5.80E-04 | 5.10E-04  | 1.08E-03 |
| 4.70E-06 | -3.49E-04 | -5.31E-04 | 4.41E-04 | 7.73E-05  | 9.73E-04 |
| 4.74E-06 | 1.79E-04  | -8.84E-05 | 4.30E-04 | 6.97E-04  | 1.26E-03 |
| 4.77E-06 | 5.40E-04  | -5.84E-04 | 1.14E-04 | 2.74E-04  | 7.49E-04 |
| 4.80E-06 | 1.84E-05  | -3.63E-04 | 7.51E-04 | 4.00E-05  | 9.08E-04 |
| 4.83E-06 | -7.66E-05 | -2.42E-04 | 9.35E-04 | 2.21E-04  | 8.16E-04 |
| 4.86E-06 | 3.09E-04  | -1.88E-04 | 6.01E-04 | 9.45E-04  | 8.54E-04 |
| 4.90E-06 | -1.87E-04 | -2.62E-05 | 9.43E-04 | 7.76E-04  | 9.16E-04 |
| 4.93E-06 | -2.18E-04 | -1.04E-04 | 2.59E-04 | 4.87E-04  | 1.26E-03 |
| 4.96E-06 | 2.36E-04  | -2.31E-04 | 8.14E-04 | 6.75E-05  | 9.14E-04 |
| 4.99E-06 | -6.31E-04 | 6.27E-05  | 1.06E-03 | 2.17E-04  | 1.04E-03 |
| 5.02E-06 | -7.49E-04 | -1.40E-04 | 7.15E-04 | 3.17E-04  | 7.51E-04 |
| 5.06E-06 | -4.09E-04 | -2.45E-04 | 6.09E-05 | 7.08E-04  | 1.01E-03 |
| 5.09E-06 | -2.39E-04 | -6.23E-05 | 3.07E-04 | 6.43E-04  | 1.02E-03 |
| 5.12E-06 | -3.19E-04 | 5.15E-05  | 3.56E-04 | 3.75E-04  | 5.08E-04 |
| 5.15E-06 | -4.48E-04 | -1.16E-04 | 3.38E-04 | 2.97E-04  | 7.63E-04 |
| 5.18E-06 | 1.54E-04  | -2.52E-04 | 1.81E-04 | 7.36E-04  | 1.37E-03 |
| 5.22E-06 | -3.11E-04 | -8.02E-05 | 4.56E-04 | 4.35E-04  | 7.36E-04 |
| 5.25E-06 | 5.37E-04  | 1.33E-04  | 1.35E-04 | -1.08E-04 | 1.11E-03 |
| 5.28E-06 | 8.20E-05  | -1.93E-04 | 8.88E-05 | 3.87E-04  | 1.29E-03 |
| 5.31E-06 | 9.22E-05  | -1.03E-04 | 5.91E-04 | 1.02E-03  | 1.18E-03 |
| 5.34E-06 | -4.18E-04 | -1.99E-04 | 6.96E-04 | 6.06E-04  | 1.17E-03 |
| 5.38E-06 | -3.87E-04 | -5.00E-05 | 4.12E-04 | 4.70E-06  | 1.07E-03 |
| 5.41E-06 | -1.26E-04 | -1.40E-04 | 7.45E-04 | 3.98E-04  | 7.03E-04 |
| 5.44E-06 | -3.61E-04 | -2.47E-04 | 5.02E-04 | 4.21E-04  | 5.35E-04 |
| 5.47E-06 | -3.33E-05 | -1.18E-04 | 3.00E-04 | 1.88E-04  | 8.01E-04 |
| 5.50E-06 | -1.52E-04 | 1.33E-04  | 7.67E-04 | -8.87E-05 | 1.16E-03 |
| 5.54E-06 | -2.45E-04 | -2.56E-04 | 8.48E-04 | 4.46E-04  | 8.09E-04 |
| 5.57E-06 | -3.92E-06 | -3.98E-04 | 3.69E-04 | 3.59E-04  | 8.51E-04 |
| 5.60E-06 | -5.64E-04 | -1.70E-04 | 5.00E-04 | -3.01E-04 | 7.33E-04 |
| 5.63E-06 | 1.18E-04  | -5.75E-06 | 5.55E-04 | 4.37E-04  | 1.11E-03 |
| 5.66E-06 | -7.66E-04 | -1.34E-04 | 8.42E-04 | 3.67E-04  | 9.08E-04 |
| 5.70E-06 | -5.33E-04 | -1.73E-04 | 3.80E-04 | 5.90E-04  | 1.36E-03 |
| 5.73E-06 | -2.42E-04 | -3.43E-04 | 8.88E-04 | -1.76E-04 | 7.12E-04 |

|          |           |           |           |           |           |
|----------|-----------|-----------|-----------|-----------|-----------|
| 5.76E-06 | -8.35E-04 | -1.66E-05 | 1.26E-03  | -1.35E-04 | 3.74E-04  |
| 5.79E-06 | -4.58E-05 | -2.14E-04 | 9.91E-04  | -6.68E-05 | -1.19E-04 |
| 5.82E-06 | -3.27E-04 | -1.86E-04 | 1.32E-03  | 2.03E-04  | 2.85E-04  |
| 5.86E-06 | -3.62E-04 | -4.62E-04 | 1.07E-04  | -6.69E-04 | 5.64E-04  |
| 5.89E-06 | -2.45E-04 | -1.25E-04 | 1.55E-04  | 3.76E-06  | 2.66E-04  |
| 5.92E-06 | -5.52E-04 | -3.41E-04 | 2.84E-04  | 4.56E-04  | 4.21E-04  |
| 5.95E-06 | -2.65E-04 | -3.31E-04 | 7.32E-04  | 8.73E-05  | 6.63E-04  |
| 5.98E-06 | 1.21E-04  | 3.70E-04  | 1.73E-04  | 6.67E-04  | 8.19E-04  |
| 6.02E-06 | -3.43E-04 | -8.71E-05 | 1.43E-04  | -6.30E-05 | 1.19E-03  |
| 6.05E-06 | -2.01E-04 | -9.32E-05 | 4.97E-04  | 5.66E-04  | 1.14E-03  |
| 6.08E-06 | -7.93E-04 | -2.72E-04 | 2.87E-04  | 4.37E-04  | 4.02E-04  |
| 6.11E-06 | -8.05E-04 | -2.32E-04 | 1.10E-04  | 4.76E-04  | 1.27E-03  |
| 6.14E-06 | -6.31E-04 | -2.94E-04 | 6.33E-04  | -1.37E-04 | 1.09E-03  |
| 6.18E-06 | -4.84E-04 | -6.06E-05 | 5.08E-04  | 1.75E-04  | 1.32E-03  |
| 6.21E-06 | -7.17E-04 | -9.15E-05 | 5.93E-04  | 6.90E-04  | 3.84E-04  |
| 6.24E-06 | -2.72E-04 | -1.11E-04 | 1.08E-04  | -5.35E-06 | 1.08E-03  |
| 6.27E-06 | -8.65E-04 | -3.19E-04 | 9.85E-04  | -3.61E-04 | 1.07E-03  |
| 6.30E-06 | -2.46E-04 | 3.01E-05  | 1.77E-04  | 1.54E-04  | 6.16E-04  |
| 6.34E-06 | -6.03E-05 | -3.83E-04 | 4.48E-04  | 8.41E-05  | 8.55E-04  |
| 6.37E-06 | -5.59E-04 | -5.56E-04 | 6.57E-04  | 5.85E-04  | 7.51E-04  |
| 6.40E-06 | -3.16E-04 | 5.26E-06  | 5.35E-04  | 1.07E-04  | 8.10E-04  |
| 6.43E-06 | -6.25E-04 | -4.42E-04 | -1.01E-05 | -1.31E-05 | 5.76E-04  |
| 6.46E-06 | -2.60E-04 | -2.60E-04 | -3.44E-04 | -2.36E-05 | 5.25E-04  |
| 6.50E-06 | 8.47E-05  | -3.55E-04 | 3.26E-04  | 3.38E-04  | 7.23E-04  |
| 6.53E-06 | -6.36E-04 | -2.22E-04 | 4.85E-06  | 1.60E-04  | 1.13E-03  |
| 6.56E-06 | -4.71E-04 | -2.09E-04 | -1.05E-04 | 3.87E-05  | 7.32E-04  |
| 6.59E-06 | -4.43E-04 | -1.82E-04 | 2.82E-04  | 5.49E-04  | 8.31E-04  |
| 6.62E-06 | -2.18E-04 | -5.88E-04 | 6.87E-04  | 7.67E-04  | 8.92E-04  |
| 6.66E-06 | -9.15E-04 | -8.16E-05 | 1.22E-03  | 3.31E-04  | 8.45E-04  |
| 6.69E-06 | -4.65E-04 | -1.45E-04 | -1.73E-04 | -3.95E-04 | 1.16E-03  |
| 6.72E-06 | -1.06E-03 | -1.18E-04 | 6.35E-05  | -1.44E-04 | 6.65E-04  |
| 6.75E-06 | -9.31E-05 | -6.17E-05 | 1.78E-06  | -2.28E-04 | 6.37E-04  |
| 6.78E-06 | 3.59E-04  | -5.55E-04 | 3.51E-04  | 4.35E-04  | 9.16E-04  |
| 6.82E-06 | -8.77E-04 | -4.25E-04 | 2.41E-04  | 5.46E-04  | 9.84E-04  |
| 6.85E-06 | -1.71E-04 | -2.01E-04 | 9.06E-04  | -2.15E-04 | 1.45E-03  |
| 6.88E-06 | -7.93E-04 | -2.23E-04 | 7.29E-04  | 5.54E-04  | 1.37E-03  |
| 6.91E-06 | 2.76E-04  | -1.30E-04 | 3.31E-04  | 3.74E-04  | 9.11E-04  |
| 6.94E-06 | -5.77E-04 | -4.52E-04 | -1.97E-04 | 4.77E-04  | 5.55E-04  |
| 6.98E-06 | -5.08E-04 | 1.34E-04  | 3.65E-04  | -3.55E-04 | 1.22E-03  |
| 7.01E-06 | 1.33E-04  | -2.14E-04 | 3.31E-04  | 1.78E-04  | 1.09E-03  |
| 7.04E-06 | -1.30E-05 | -2.88E-04 | 3.99E-04  | 3.64E-04  | 1.06E-03  |
| 7.07E-06 | -5.61E-04 | 3.51E-04  | 2.35E-04  | 2.31E-04  | 8.72E-04  |
| 7.10E-06 | -2.57E-04 | -2.53E-04 | -1.76E-04 | -7.31E-05 | 6.94E-04  |
| 7.14E-06 | -5.98E-04 | 3.89E-04  | 4.82E-04  | 1.98E-04  | 1.20E-03  |
| 7.17E-06 | -2.80E-04 | -1.56E-04 | 6.37E-04  | -2.10E-04 | 1.18E-03  |
| 7.20E-06 | -2.37E-04 | -1.61E-05 | 1.01E-03  | -7.22E-05 | -3.36E-04 |
| 7.23E-06 | -7.31E-05 | -1.56E-04 | 4.00E-04  | 2.68E-04  | 8.86E-04  |
| 7.26E-06 | -2.76E-04 | -1.05E-04 | 1.99E-04  | 4.16E-05  | 7.10E-04  |
| 7.30E-06 | -2.28E-04 | 3.23E-04  | 2.47E-04  | 2.06E-04  | 4.40E-04  |
| 7.33E-06 | -9.85E-04 | -1.33E-04 | 4.28E-04  | -1.48E-04 | 8.83E-04  |
| 7.36E-06 | -6.31E-04 | -4.49E-04 | 9.29E-04  | -2.40E-04 | 1.04E-03  |
| 7.39E-06 | -8.03E-04 | -5.44E-04 | 8.65E-04  | -1.65E-04 | 6.41E-04  |
| 7.42E-06 | -7.42E-04 | -3.20E-05 | 7.62E-04  | -3.80E-04 | 8.59E-05  |
| 7.46E-06 | -6.96E-04 | -6.25E-05 | 2.55E-04  | 3.48E-04  | 2.11E-04  |

|          |           |           |           |           |          |
|----------|-----------|-----------|-----------|-----------|----------|
| 7.49E-06 | -7.45E-04 | -3.32E-04 | 4.10E-04  | -4.10E-05 | 3.05E-04 |
| 7.52E-06 | -3.35E-04 | -3.34E-04 | -2.22E-04 | 1.85E-04  | 3.64E-04 |
| 7.55E-06 | 6.70E-04  | -4.48E-04 | -5.49E-05 | -2.09E-04 | 9.11E-04 |
| 7.58E-06 | -7.75E-04 | -4.06E-05 | 1.82E-04  | 7.67E-05  | 1.11E-03 |
| 7.62E-06 | -4.04E-04 | -9.35E-04 | 8.01E-04  | -8.51E-05 | 6.82E-04 |
| 7.65E-06 | -7.13E-04 | -9.07E-05 | 8.89E-04  | 1.02E-04  | 1.21E-03 |
| 7.68E-06 | -4.24E-04 | 7.81E-05  | 3.44E-04  | 8.79E-04  | 2.98E-04 |
| 7.71E-06 | -1.27E-04 | -3.81E-05 | 3.46E-04  | 6.29E-04  | 1.22E-03 |
| 7.74E-06 | -8.17E-04 | -4.93E-04 | 9.25E-04  | -9.61E-05 | 1.05E-03 |
| 7.78E-06 | -5.39E-04 | -2.39E-04 | 5.29E-04  | -5.94E-04 | 1.10E-03 |
| 7.81E-06 | -4.80E-04 | -4.62E-04 | 4.11E-04  | 8.15E-06  | 3.98E-04 |
| 7.84E-06 | -1.58E-04 | -1.09E-04 | 9.20E-05  | 2.09E-04  | 6.18E-04 |
| 7.87E-06 | -1.01E-03 | 1.21E-04  | 3.49E-04  | 4.77E-04  | 4.57E-04 |
| 7.90E-06 | -8.17E-04 | -4.96E-04 | 3.98E-04  | -9.19E-05 | 5.94E-04 |
| 7.94E-06 | -3.58E-04 | -9.80E-05 | 3.45E-04  | -2.30E-04 | 5.20E-04 |
| 7.97E-06 | 6.30E-05  | -1.84E-04 | 1.15E-04  | -9.14E-05 | 1.17E-03 |
| 8.00E-06 | -8.45E-04 | -2.56E-04 | 5.70E-04  | -4.85E-04 | 7.02E-05 |
| 8.03E-06 | -7.99E-04 | -6.51E-04 | 5.72E-04  | -2.03E-04 | 6.03E-04 |
| 8.06E-06 | -2.83E-04 | -7.09E-04 | 4.48E-04  | -3.95E-04 | 3.22E-04 |
| 8.10E-06 | -7.78E-04 | -5.35E-04 | 5.59E-04  | 1.09E-04  | 8.39E-04 |
| 8.13E-06 | -3.39E-04 | -3.25E-04 | 1.62E-04  | -4.83E-04 | 5.82E-04 |
| 8.16E-06 | -7.77E-04 | 2.70E-04  | 4.46E-04  | -4.23E-04 | 5.89E-04 |
| 8.19E-06 | -4.80E-04 | -6.85E-04 | 3.26E-04  | -1.02E-04 | 1.13E-04 |
| 8.22E-06 | -4.55E-04 | -4.50E-04 | 6.59E-04  | -5.95E-04 | 3.98E-04 |
| 8.26E-06 | -7.69E-04 | -4.47E-04 | 5.48E-04  | -2.71E-04 | 2.94E-05 |
| 8.29E-06 | -3.81E-04 | -1.79E-04 | 1.06E-04  | -3.71E-05 | 8.75E-04 |
| 8.32E-06 | -5.85E-04 | -1.43E-04 | 3.00E-04  | 2.50E-04  | 8.56E-04 |
| 8.35E-06 | -6.50E-05 | -1.25E-04 | 4.80E-04  | -3.88E-04 | 3.85E-05 |
| 8.38E-06 | -4.50E-04 | -5.96E-05 | 5.76E-04  | 9.45E-05  | 8.03E-04 |
| 8.42E-06 | -3.42E-04 | -7.56E-04 | 1.31E-04  | -4.12E-04 | 9.49E-04 |
| 8.45E-06 | -1.13E-04 | -3.71E-04 | 1.37E-03  | -5.47E-04 | 9.06E-04 |
| 8.48E-06 | -2.94E-04 | -1.68E-04 | 2.55E-04  | 2.49E-04  | 7.91E-04 |
| 8.51E-06 | -4.40E-04 | -7.92E-04 | 9.72E-05  | -2.18E-04 | 1.02E-03 |
| 8.54E-06 | -1.40E-04 | -3.12E-04 | 5.44E-04  | -2.67E-04 | 8.54E-04 |
| 8.58E-06 | -2.43E-04 | -3.23E-04 | 8.59E-04  | -2.38E-04 | 4.40E-04 |
| 8.61E-06 | -4.78E-04 | -1.94E-04 | 4.27E-04  | -2.38E-04 | 4.94E-04 |
| 8.64E-06 | -7.17E-04 | -1.58E-04 | 5.97E-04  | -8.41E-05 | 2.48E-04 |
| 8.67E-06 | -2.41E-04 | -5.78E-05 | 4.70E-04  | -2.60E-04 | 7.47E-04 |
| 8.70E-06 | -2.65E-04 | -7.30E-05 | 1.77E-04  | 1.81E-06  | 9.59E-04 |
| 8.74E-06 | -7.38E-04 | 9.10E-06  | 8.97E-05  | 5.67E-05  | 3.10E-04 |
| 8.77E-06 | 1.55E-04  | 7.11E-05  | 1.88E-04  | 1.36E-04  | 4.46E-04 |
| 8.80E-06 | -4.30E-04 | -2.90E-04 | 6.72E-04  | -2.43E-04 | 4.16E-04 |
| 8.83E-06 | -3.03E-04 | -2.31E-04 | 6.66E-04  | -4.26E-04 | 1.64E-04 |
| 8.86E-06 | -2.65E-04 | -3.41E-04 | 2.12E-04  | -1.71E-04 | 8.60E-04 |
| 8.90E-06 | -1.09E-04 | 2.40E-05  | 6.93E-04  | -1.43E-04 | 4.30E-04 |
| 8.93E-06 | -2.54E-04 | -8.85E-04 | -5.96E-07 | -2.16E-04 | 7.10E-04 |
| 8.96E-06 | -1.64E-04 | -6.57E-04 | 6.87E-04  | -1.67E-04 | 4.79E-04 |
| 8.99E-06 | -7.26E-04 | 1.83E-05  | 2.60E-04  | 2.51E-04  | 3.51E-04 |
| 9.02E-06 | -1.83E-04 | 6.16E-04  | 8.63E-04  | 2.12E-05  | 3.71E-04 |
| 9.06E-06 | -3.00E-04 | -3.77E-04 | 5.02E-04  | -2.85E-04 | 8.10E-04 |
| 9.09E-06 | -4.82E-04 | -1.02E-04 | 1.50E-05  | 2.34E-04  | 5.38E-04 |
| 9.12E-06 | 7.08E-05  | 2.63E-04  | 5.08E-04  | 6.96E-04  | 5.71E-04 |
| 9.15E-06 | 3.70E-05  | -6.02E-04 | 8.18E-04  | 1.30E-04  | 8.42E-04 |
| 9.18E-06 | -7.03E-04 | 3.53E-05  | 8.11E-05  | -1.11E-04 | 5.83E-04 |

|          |           |           |           |           |           |
|----------|-----------|-----------|-----------|-----------|-----------|
| 9.22E-06 | 2.68E-04  | -1.04E-03 | 9.71E-04  | 3.46E-04  | 4.15E-04  |
| 9.25E-06 | -1.62E-05 | -1.06E-03 | 3.42E-04  | 1.23E-04  | 3.38E-04  |
| 9.28E-06 | -1.17E-04 | -4.31E-04 | 7.07E-04  | -5.31E-05 | 4.35E-04  |
| 9.31E-06 | 3.07E-04  | 1.28E-04  | -1.04E-04 | 3.36E-04  | -2.68E-04 |
| 9.34E-06 | -4.64E-04 | -2.51E-04 | 1.81E-04  | 4.28E-04  | -5.90E-05 |
| 9.38E-06 | -5.70E-05 | -8.12E-04 | 4.51E-04  | -1.44E-04 | 5.51E-04  |
| 9.41E-06 | -4.99E-04 | 4.26E-04  | 1.61E-04  | -1.99E-04 | 2.16E-04  |
| 9.44E-06 | -2.47E-04 | -6.37E-04 | 6.39E-04  | 1.77E-04  | 6.45E-04  |
| 9.47E-06 | 5.98E-05  | 2.45E-04  | 7.26E-05  | -6.01E-05 | 2.82E-04  |
| 9.50E-06 | -1.51E-04 | -4.59E-04 | 2.42E-04  | -3.99E-04 | 2.38E-04  |
| 9.54E-06 | -2.81E-04 | 4.06E-05  | 3.43E-04  | -3.61E-04 | 8.91E-04  |
| 9.57E-06 | 3.18E-05  | -3.50E-04 | 7.86E-04  | -9.07E-06 | 4.05E-04  |
| 9.60E-06 | -3.62E-04 | 1.64E-04  | 7.19E-04  | 3.25E-05  | 3.70E-04  |
| 9.63E-06 | -5.53E-04 | 3.03E-04  | 3.15E-04  | -1.26E-05 | 6.28E-04  |
| 9.66E-06 | -1.69E-05 | 6.95E-04  | 8.37E-04  | 3.93E-04  | 6.38E-04  |
| 9.70E-06 | -1.02E-04 | 4.99E-04  | 6.97E-04  | 1.47E-04  | 5.03E-04  |
| 9.73E-06 | 6.85E-07  | -4.96E-04 | 4.52E-04  | 1.43E-04  | -1.07E-04 |
| 9.76E-06 | 4.04E-05  | -3.54E-04 | 5.13E-04  | -1.57E-04 | -3.55E-04 |
| 9.79E-06 | 5.18E-05  | -9.11E-05 | 5.69E-04  | -2.21E-04 | 2.24E-04  |
| 9.82E-06 | -1.89E-04 | 2.39E-04  | -1.14E-04 | 9.03E-06  | 6.39E-04  |
| 9.86E-06 | -2.15E-04 | -4.09E-04 | 4.38E-04  | 1.90E-04  | 2.81E-04  |
| 9.89E-06 | -5.59E-04 | -2.76E-04 | 4.51E-04  | 2.75E-04  | 4.85E-04  |
| 9.92E-06 | -3.01E-04 | -5.24E-04 | 3.83E-04  | -2.62E-04 | 1.08E-04  |
| 9.95E-06 | -1.70E-05 | -6.92E-04 | 1.01E-03  | -3.42E-04 | 3.21E-04  |
| 9.98E-06 | -2.27E-04 | -5.16E-08 | 3.76E-04  | -7.09E-04 | -5.54E-05 |
| 1.00E-05 | -3.62E-04 | 1.29E-04  | 4.85E-04  | 6.28E-05  | -8.26E-05 |
| 1.01E-05 | -2.90E-04 | 5.55E-05  | 5.59E-04  | 9.87E-05  | 7.67E-07  |
| 1.01E-05 | -6.28E-04 | -6.68E-04 | 8.34E-04  | 1.16E-04  | 5.61E-04  |
| 1.01E-05 | -5.12E-04 | -4.03E-04 | 3.93E-04  | 1.21E-05  | 5.38E-04  |
| 1.01E-05 | -2.69E-04 | -3.66E-04 | 7.33E-04  | 5.90E-04  | -1.83E-04 |
| 1.02E-05 | -1.90E-04 | -7.10E-05 | 7.27E-04  | 8.87E-05  | 2.76E-04  |
| 1.02E-05 | -1.08E-04 | -4.70E-04 | 4.96E-04  | -1.72E-04 | 3.54E-04  |
| 1.02E-05 | -3.38E-04 | -4.33E-04 | 5.75E-04  | 2.15E-04  | 4.09E-04  |
| 1.03E-05 | 1.99E-04  | -1.44E-04 | 6.19E-04  | 2.19E-04  | 1.60E-04  |
| 1.03E-05 | -2.10E-04 | -2.54E-04 | 6.04E-04  | 5.07E-04  | 1.89E-04  |
| 1.03E-05 | -4.22E-05 | -6.68E-04 | 5.71E-04  | 5.25E-05  | -2.75E-04 |
| 1.04E-05 | -2.21E-04 | -2.49E-04 | 8.33E-04  | 1.87E-04  | 1.62E-04  |
| 1.04E-05 | -3.44E-04 | -1.09E-04 | 7.95E-04  | -1.35E-04 | 4.16E-04  |
| 1.04E-05 | 2.45E-04  | -5.35E-04 | 9.38E-04  | -5.19E-07 | 2.49E-04  |
| 1.05E-05 | 5.67E-05  | -1.54E-04 | 2.29E-04  | -2.71E-04 | -8.46E-05 |
| 1.05E-05 | 6.04E-04  | -3.03E-04 | 6.75E-04  | 1.10E-04  | 2.13E-04  |
| 1.05E-05 | -1.46E-04 | -7.34E-04 | 6.30E-04  | -3.31E-04 | 4.44E-04  |
| 1.06E-05 | 4.93E-04  | -2.94E-04 | 6.39E-04  | -5.50E-05 | 1.04E-04  |
| 1.06E-05 | 2.81E-04  | -3.01E-04 | 9.58E-04  | 6.17E-06  | -2.96E-04 |
| 1.06E-05 | 9.55E-05  | -6.87E-04 | 5.29E-04  | 3.71E-04  | -1.46E-05 |
| 1.07E-05 | 4.28E-05  | -8.01E-04 | 6.00E-04  | 1.51E-04  | 1.72E-04  |
| 1.07E-05 | -4.51E-04 | -1.87E-04 | 8.67E-04  | 6.76E-04  | 6.07E-04  |
| 1.07E-05 | -4.27E-04 | -7.85E-05 | 8.86E-04  | 4.66E-04  | 1.08E-04  |
| 1.08E-05 | 2.61E-04  | 9.14E-05  | 6.74E-04  | -1.59E-04 | 2.31E-04  |
| 1.08E-05 | -2.44E-05 | -7.28E-04 | 1.07E-03  | 6.55E-04  | 4.50E-04  |
| 1.08E-05 | -3.31E-04 | -1.01E-04 | 8.61E-04  | 4.56E-04  | 3.11E-04  |
| 1.09E-05 | 7.78E-05  | 2.55E-04  | 9.81E-04  | 5.48E-04  | 1.01E-04  |
| 1.09E-05 | 6.20E-04  | -5.41E-04 | 4.94E-04  | 4.28E-04  | 2.83E-05  |
| 1.09E-05 | 5.30E-04  | -1.82E-04 | 1.03E-04  | 5.91E-05  | -9.49E-05 |



|          |           |           |          |           |           |
|----------|-----------|-----------|----------|-----------|-----------|
| 1.09E-05 | 2.02E-04  | -6.86E-04 | 1.21E-03 | 2.79E-04  | 2.38E-04  |
| 1.10E-05 | 2.79E-04  | -1.75E-04 | 8.53E-04 | -1.88E-04 | 2.90E-04  |
| 1.10E-05 | 4.01E-04  | -8.09E-05 | 2.19E-04 | 6.32E-04  | -4.58E-07 |
| 1.10E-05 | 2.39E-04  | -4.45E-04 | 9.20E-04 | 1.50E-04  | 4.44E-04  |
| 1.11E-05 | 8.37E-05  | -2.72E-04 | 7.28E-04 | 1.71E-04  | 2.98E-04  |
| 1.11E-05 | 2.52E-04  | -4.53E-04 | 7.45E-04 | -8.76E-06 | 1.14E-04  |
| 1.11E-05 | 9.88E-05  | -7.84E-04 | 7.57E-04 | 2.16E-04  | 2.43E-04  |
| 1.12E-05 | 4.80E-04  | -4.83E-04 | 2.00E-04 | 3.44E-04  | 4.28E-04  |
| 1.12E-05 | 4.37E-04  | -6.44E-04 | 1.08E-03 | -6.03E-04 | 1.40E-04  |
| 1.12E-05 | 1.44E-04  | -5.41E-05 | 6.84E-04 | -3.03E-04 | 5.25E-04  |
| 1.13E-05 | 3.06E-04  | -6.72E-04 | 5.70E-05 | 4.05E-04  | 2.33E-04  |
| 1.13E-05 | 4.14E-04  | -1.89E-04 | 6.56E-04 | 4.13E-04  | -1.67E-05 |
| 1.13E-05 | 2.91E-04  | -2.11E-04 | 3.30E-04 | 2.27E-04  | 1.30E-04  |
| 1.14E-05 | -3.37E-04 | -8.19E-04 | 7.69E-04 | 4.25E-04  | 2.99E-04  |
| 1.14E-05 | -1.87E-04 | -6.29E-04 | 6.32E-04 | -7.42E-06 | 3.43E-04  |
| 1.14E-05 | 5.98E-04  | -3.24E-04 | 7.98E-04 | 5.07E-04  | 5.13E-04  |
| 1.15E-05 | -9.61E-05 | -5.06E-04 | 2.81E-04 | 7.12E-04  | -4.86E-05 |
| 1.15E-05 | 9.58E-05  | -1.35E-04 | 7.58E-04 | 2.65E-04  | 5.90E-04  |
| 1.15E-05 | 3.72E-04  | -3.09E-04 | 3.48E-04 | 7.15E-04  | 2.28E-05  |
| 1.16E-05 | 2.46E-04  | -7.88E-04 | 1.12E-04 | 1.70E-04  | 1.37E-04  |
| 1.16E-05 | -2.60E-04 | -6.97E-04 | 8.41E-04 | 4.51E-05  | 4.07E-04  |
| 1.16E-05 | 1.12E-04  | -6.08E-05 | 3.76E-04 | 2.27E-04  | 3.63E-04  |
| 1.17E-05 | -7.53E-05 | -3.43E-04 | 8.24E-04 | -8.48E-05 | 5.39E-04  |
| 1.17E-05 | -2.83E-05 | -4.45E-04 | 4.38E-04 | 5.97E-05  | 7.61E-04  |
| 1.17E-05 | 4.90E-05  | -4.15E-04 | 6.98E-04 | 2.38E-04  | 2.72E-04  |
| 1.17E-05 | 4.01E-04  | -4.09E-04 | 6.46E-04 | 1.77E-04  | 3.02E-04  |
| 1.18E-05 | 3.35E-04  | -4.90E-04 | 1.14E-03 | 2.01E-04  | 3.05E-04  |
| 1.18E-05 | 7.43E-05  | -2.90E-04 | 5.64E-04 | 2.08E-04  | 4.93E-04  |
| 1.18E-05 | 3.39E-04  | -1.83E-04 | 1.15E-03 | 1.04E-04  | -1.04E-04 |
| 1.19E-05 | -1.49E-04 | -6.53E-04 | 5.83E-04 | 9.92E-05  | -3.13E-05 |
| 1.19E-05 | -1.59E-04 | -1.96E-04 | 5.71E-04 | 1.36E-04  | 3.60E-04  |
| 1.19E-05 | 3.66E-04  | 2.67E-05  | 1.10E-03 | 6.47E-04  | 2.92E-04  |
| 1.20E-05 | -1.86E-05 | -2.19E-04 | 5.85E-04 | 4.63E-04  | 3.24E-04  |
| 1.20E-05 | 2.96E-04  | -6.35E-04 | 9.68E-04 | 4.39E-04  | 3.93E-04  |
| 1.20E-05 | 5.73E-04  | -1.81E-04 | 8.57E-04 | 3.97E-04  | 1.75E-04  |
| 1.21E-05 | 3.36E-04  | -3.94E-04 | 1.41E-04 | -4.92E-05 | -6.09E-06 |
| 1.21E-05 | -4.22E-04 | -5.70E-04 | 2.77E-04 | 7.38E-04  | 1.34E-04  |
| 1.21E-05 | 9.99E-05  | -8.40E-04 | 6.63E-04 | 3.31E-04  | -2.38E-04 |
| 1.22E-05 | -2.98E-04 | -2.30E-04 | 2.52E-04 | 5.32E-04  | -1.75E-04 |
| 1.22E-05 | 2.65E-04  | 1.48E-05  | 1.35E-04 | 5.90E-04  | -4.26E-07 |
| 1.22E-05 | 3.08E-04  | 3.00E-06  | 1.16E-03 | 4.43E-04  | -1.80E-04 |
| 1.23E-05 | 3.95E-04  | -5.17E-04 | 1.38E-03 | 8.29E-05  | 4.34E-04  |
| 1.23E-05 | 2.27E-04  | -6.10E-04 | 8.40E-04 | 1.49E-04  | 2.75E-04  |
| 1.23E-05 | 2.03E-04  | -5.01E-04 | 6.78E-04 | 2.51E-04  | 4.04E-04  |
| 1.24E-05 | 2.55E-04  | -3.40E-04 | 3.72E-04 | -2.29E-04 | 5.49E-04  |
| 1.24E-05 | 2.80E-04  | -6.75E-04 | 6.99E-04 | 7.86E-05  | 4.40E-04  |
| 1.24E-05 | 7.31E-04  | -4.17E-04 | 6.70E-04 | 4.96E-04  | 1.89E-04  |
| 1.25E-05 | 5.96E-04  | -7.82E-04 | 6.65E-04 | 3.44E-04  | 5.59E-04  |
| 1.25E-05 | 2.32E-04  | -8.17E-04 | 3.89E-04 | 1.63E-04  | 6.10E-04  |
| 1.25E-05 | 2.78E-04  | -2.74E-04 | 5.84E-04 | 5.84E-05  | 2.14E-05  |
| 1.25E-05 | -7.09E-05 | -2.73E-04 | 1.17E-04 | 3.63E-04  | 4.36E-04  |
| 1.26E-05 | 1.83E-04  | -9.03E-05 | 6.93E-04 | -7.21E-05 | 2.67E-04  |
| 1.26E-05 | 1.60E-04  | -2.95E-04 | 1.39E-04 | 2.44E-04  | 5.49E-05  |
| 1.26E-05 | 3.91E-04  | -2.03E-04 | 8.75E-04 | 1.62E-04  | -2.68E-04 |

|          |           |           |           |           |           |
|----------|-----------|-----------|-----------|-----------|-----------|
| 1.27E-05 | 3.36E-04  | 2.46E-05  | 6.42E-04  | 6.73E-04  | -4.72E-05 |
| 1.27E-05 | -4.31E-04 | -2.65E-04 | 7.20E-04  | 1.74E-04  | 3.44E-04  |
| 1.27E-05 | -6.95E-04 | -1.69E-04 | 7.99E-04  | 7.42E-04  | 4.30E-04  |
| 1.28E-05 | 1.06E-06  | -4.84E-04 | 7.00E-04  | 4.05E-04  | 3.21E-04  |
| 1.28E-05 | 4.18E-04  | -7.70E-04 | 3.57E-04  | 2.92E-04  | 2.70E-04  |
| 1.28E-05 | -9.96E-05 | -4.73E-04 | 4.01E-04  | 2.50E-04  | 3.77E-05  |
| 1.29E-05 | -3.23E-04 | -3.37E-04 | 3.42E-04  | -2.46E-04 | 6.44E-04  |
| 1.29E-05 | 1.12E-04  | 4.19E-05  | 5.62E-04  | 1.81E-04  | 4.90E-04  |
| 1.29E-05 | -2.99E-04 | 1.75E-04  | 1.27E-04  | 5.68E-04  | -5.71E-04 |
| 1.30E-05 | 3.06E-04  | -2.75E-04 | 1.71E-04  | 3.61E-04  | 2.79E-04  |
| 1.30E-05 | -2.87E-05 | -1.22E-04 | 1.03E-03  | 1.46E-04  | 2.27E-05  |
| 1.30E-05 | -5.57E-05 | -1.95E-04 | 7.38E-04  | 3.09E-04  | -5.45E-05 |
| 1.31E-05 | 2.37E-05  | -4.04E-04 | 4.09E-04  | -2.80E-04 | 2.71E-04  |
| 1.31E-05 | 1.82E-04  | 1.85E-04  | 6.41E-04  | 4.59E-04  | 2.63E-04  |
| 1.31E-05 | -8.20E-05 | 3.83E-06  | 7.71E-04  | 3.97E-05  | 2.79E-04  |
| 1.32E-05 | 5.66E-06  | -1.92E-05 | 1.67E-04  | 3.68E-05  | 1.77E-04  |
| 1.32E-05 | 3.06E-04  | -2.10E-04 | 8.98E-04  | -8.57E-04 | 2.34E-04  |
| 1.32E-05 | -1.64E-04 | -2.25E-04 | 2.15E-04  | 1.24E-04  | 4.00E-04  |
| 1.33E-05 | -6.85E-05 | 1.37E-04  | 3.80E-04  | -5.55E-05 | 1.44E-04  |
| 1.33E-05 | -2.28E-04 | -3.01E-04 | 3.55E-04  | 3.13E-04  | 4.74E-04  |
| 1.33E-05 | 3.67E-04  | -6.14E-04 | 8.37E-04  | 3.75E-04  | 5.66E-04  |
| 1.33E-05 | 3.46E-04  | -2.08E-04 | 5.71E-04  | 5.20E-05  | 5.64E-04  |
| 1.34E-05 | 5.48E-04  | -3.39E-04 | 6.10E-04  | 5.91E-04  | 2.00E-04  |
| 1.34E-05 | -1.84E-04 | -2.80E-04 | 2.94E-04  | -1.78E-04 | 6.47E-04  |
| 1.34E-05 | -1.19E-04 | -4.40E-04 | 6.93E-04  | 6.25E-04  | 4.38E-04  |
| 1.35E-05 | -1.88E-04 | -2.38E-05 | 3.97E-04  | 3.46E-04  | 3.25E-04  |
| 1.35E-05 | 3.78E-04  | -6.21E-04 | 9.72E-04  | -1.95E-05 | 6.17E-04  |
| 1.35E-05 | 2.83E-04  | -5.41E-04 | 8.85E-04  | 3.30E-04  | 2.09E-04  |
| 1.36E-05 | -2.55E-04 | -3.78E-04 | 6.30E-04  | 9.13E-04  | 3.21E-04  |
| 1.36E-05 | -4.55E-04 | -7.57E-04 | 6.52E-04  | 2.63E-04  | 6.93E-04  |
| 1.36E-05 | -4.29E-04 | -4.91E-04 | -7.00E-05 | 2.49E-04  | 1.35E-04  |
| 1.37E-05 | -2.15E-04 | -2.33E-04 | 1.38E-04  | 5.87E-04  | 2.93E-04  |
| 1.37E-05 | 2.66E-04  | -1.81E-04 | 9.55E-04  | 5.42E-04  | 4.33E-04  |
| 1.37E-05 | 3.74E-04  | -4.98E-04 | 3.17E-04  | -8.92E-05 | 2.78E-04  |
| 1.38E-05 | 4.13E-04  | -6.70E-04 | 5.00E-04  | 2.05E-04  | 9.49E-05  |
| 1.38E-05 | 8.20E-05  | 2.43E-04  | 3.71E-04  | 3.05E-04  | 2.84E-04  |
| 1.38E-05 | -9.78E-05 | -1.60E-04 | 5.95E-04  | 3.50E-04  | 8.67E-04  |
| 1.39E-05 | 2.18E-04  | -7.50E-04 | 6.30E-04  | -1.56E-04 | 4.28E-04  |
| 1.39E-05 | 2.07E-04  | -8.25E-04 | 5.15E-04  | 3.50E-04  | 2.60E-04  |
| 1.39E-05 | 1.92E-04  | -2.76E-04 | 4.15E-05  | 1.38E-04  | 2.17E-04  |
| 1.40E-05 | -2.90E-04 | -2.49E-04 | 5.29E-04  | 9.26E-05  | 7.98E-04  |
| 1.40E-05 | 1.57E-04  | -5.55E-04 | 2.11E-04  | -2.23E-04 | 3.09E-04  |
| 1.40E-05 | 3.50E-04  | -3.68E-04 | 6.08E-04  | 6.01E-05  | 4.42E-04  |
| 1.41E-05 | -3.04E-04 | -3.19E-04 | 6.56E-04  | 5.92E-04  | 4.65E-04  |
| 1.41E-05 | -3.91E-04 | -4.23E-04 | 6.73E-04  | 3.63E-04  | 7.81E-04  |
| 1.41E-05 | -1.85E-04 | -4.09E-04 | 4.00E-04  | 1.52E-04  | 5.96E-04  |
| 1.41E-05 | -5.40E-04 | -5.83E-04 | 1.13E-04  | -4.42E-04 | 7.21E-04  |
| 1.42E-05 | 1.34E-04  | 4.95E-05  | 1.03E-03  | -9.13E-04 | 3.32E-04  |
| 1.42E-05 | -5.79E-05 | -5.72E-05 | 6.37E-05  | 3.17E-04  | 4.38E-04  |
| 1.42E-05 | -1.29E-04 | -1.62E-04 | 3.76E-04  | -2.06E-04 | 7.00E-04  |
| 1.43E-05 | 2.00E-04  | -3.24E-04 | 5.59E-04  | -9.32E-05 | 5.01E-04  |
| 1.43E-05 | -6.85E-04 | -1.97E-04 | 7.71E-04  | 1.80E-04  | 5.02E-04  |
| 1.43E-05 | -1.76E-04 | -7.24E-05 | 1.97E-04  | 8.74E-04  | 8.16E-04  |
| 1.44E-05 | 2.15E-04  | -1.38E-04 | 2.90E-04  | -1.11E-05 | 1.02E-04  |

|          |           |           |           |           |          |
|----------|-----------|-----------|-----------|-----------|----------|
| 1.44E-05 | 2.19E-04  | -1.54E-04 | 3.78E-05  | 5.60E-04  | 6.18E-04 |
| 1.44E-05 | -3.60E-04 | -1.81E-04 | 3.93E-04  | -1.67E-04 | 3.31E-04 |
| 1.45E-05 | -4.97E-04 | -3.86E-05 | 3.24E-04  | -8.23E-05 | 9.35E-05 |
| 1.45E-05 | 3.16E-05  | -3.17E-05 | -1.10E-04 | -7.09E-04 | 3.58E-04 |
| 1.45E-05 | 1.53E-04  | -1.92E-04 | 6.44E-05  | 1.17E-04  | 5.34E-04 |
| 1.46E-05 | -2.40E-05 | -8.01E-04 | 4.70E-04  | 6.81E-04  | 4.44E-04 |
| 1.46E-05 | -4.67E-04 | -4.01E-04 | 3.65E-04  | 3.38E-04  | 5.60E-04 |
| 1.46E-05 | 1.51E-05  | -5.88E-04 | 6.32E-04  | -4.46E-04 | 3.83E-04 |
| 1.47E-05 | 7.59E-04  | -2.57E-04 | 6.58E-04  | -4.72E-05 | 1.23E-04 |
| 1.47E-05 | 1.38E-05  | -2.32E-04 | 2.09E-04  | 3.94E-04  | 2.36E-04 |
| 1.47E-05 | -5.45E-04 | -2.34E-04 | 7.87E-04  | -3.96E-05 | 3.19E-04 |
| 1.48E-05 | 3.53E-04  | -1.25E-04 | 6.58E-05  | 7.48E-04  | 1.03E-04 |
| 1.48E-05 | 1.55E-04  | -1.09E-04 | 5.26E-05  | 4.24E-04  | 1.23E-03 |
| 1.48E-05 | -1.56E-04 | -3.47E-04 | 1.05E-04  | 2.17E-04  | 6.29E-04 |
| 1.49E-05 | -2.72E-04 | -4.84E-04 | 3.26E-04  | 6.91E-04  | 4.71E-04 |
| 1.49E-05 | 2.70E-05  | -8.14E-04 | 1.30E-04  | 4.86E-04  | 9.99E-04 |
| 1.49E-05 | -7.91E-05 | -1.09E-04 | 3.31E-04  | 1.50E-05  | 6.03E-04 |
| 1.49E-05 | -5.27E-05 | -5.66E-04 | 2.54E-04  | -1.35E-04 | 4.02E-04 |
| 1.50E-05 | 4.92E-04  | -2.59E-04 | 2.22E-04  | -1.41E-04 | 1.65E-04 |

**Table SI.15A:** Primary kinetic data for the reaction of 1,3-dimethyl-2-imidazolidinone (**S15**) with CumO• generated by 355 nm LFP in MeCN (**Figure SI.15A**).

| t / s   | $\Delta A$ 1,3-dimethyl-2-imidazolidinone ( <b>S15</b> ) |         |         |         |         |
|---------|----------------------------------------------------------|---------|---------|---------|---------|
|         | 5.83mM                                                   | 14.8mM  | 26.1mM  | 36.7mM  | 49.1mM  |
| -1E-06  | -0.0007                                                  | 0.00015 | 0.00018 | -0.0009 | 1.2E-05 |
| -1E-06  | -0.0012                                                  | -0.0001 | -0.0008 | -0.0014 | -5E-05  |
| -9E-07  | -0.0018                                                  | 0.00057 | 0.00043 | -0.0022 | 0.00012 |
| -9E-07  | -0.0019                                                  | 0.00028 | -0.0008 | -0.0019 | 0.00035 |
| -9E-07  | -0.0014                                                  | 0.00062 | -0.0002 | -0.0021 | 0.00036 |
| -8E-07  | -0.0014                                                  | 0.00088 | -0.0007 | -0.0016 | 0.00046 |
| -8E-07  | -0.0011                                                  | 0.00035 | -0.0008 | -0.0021 | 0.00035 |
| -8E-07  | -0.0015                                                  | 5.8E-05 | -0.0006 | -0.0021 | -3E-05  |
| -7E-07  | -0.0013                                                  | -1E-04  | 0.00021 | -0.0014 | 0.0008  |
| -7E-07  | -0.0013                                                  | -0.0005 | -0.0002 | -0.0015 | 0.00067 |
| -7E-07  | -0.0017                                                  | 1.2E-06 | -0.0007 | -0.0011 | 0.00059 |
| -6E-07  | -0.0008                                                  | 0.00078 | -0.0009 | -0.0009 | 0.00011 |
| -6E-07  | -0.0013                                                  | 0.00063 | 0.00016 | -0.0012 | 0.00035 |
| -6E-07  | -0.0016                                                  | 0.00075 | -0.0002 | -0.0026 | 0.00038 |
| -5E-07  | -0.0014                                                  | 0.00076 | -0.0004 | -0.0023 | 0.0004  |
| -5E-07  | -0.0012                                                  | 0.00032 | -0.0003 | -0.002  | 0.00044 |
| -5E-07  | -0.0018                                                  | 0.00013 | -0.0002 | -0.0015 | 0.0006  |
| -4E-07  | -0.0018                                                  | -6E-05  | -0.0011 | -0.0011 | -0.0008 |
| -4E-07  | -0.0012                                                  | 0.00031 | -9E-05  | -0.0013 | -0.0002 |
| -4E-07  | -0.0014                                                  | 0.00095 | -0.0006 | -0.0016 | -9E-05  |
| -4E-07  | -0.0007                                                  | 0.00101 | -0.0005 | -0.0018 | -9E-05  |
| -3E-07  | -0.0013                                                  | 0.0011  | -0.0009 | -0.0018 | 7.5E-05 |
| -3E-07  | -0.0014                                                  | -0.0012 | -0.0007 | -0.0015 | 0.00022 |
| -3E-07  | -0.0012                                                  | -0.0002 | -0.0009 | -0.0013 | -0.0008 |
| -2E-07  | -0.0017                                                  | -7E-05  | -0.0012 | -0.0008 | -0.0012 |
| -2E-07  | -0.001                                                   | 0.00089 | -0.0005 | -0.0007 | -0.0004 |
| -2E-07  | -0.0013                                                  | 4.6E-05 | -0.001  | -0.001  | -0.0003 |
| -1E-07  | -0.0016                                                  | 0.00055 | -6E-05  | -0.0013 | 2.7E-05 |
| -1E-07  | -0.0008                                                  | 0.00055 | -0.0002 | -0.0008 | 0.00047 |
| -6E-08  | -0.0008                                                  | 0.00086 | -0.0006 | -0.0022 | -0.0005 |
| -3E-08  | -0.0011                                                  | -0.0001 | 7.9E-05 | -0.0012 | -5E-05  |
| -2E-10  | -0.0045                                                  | -0.0031 | -0.0043 | -0.0045 | -0.0038 |
| 3.2E-08 | -0.0025                                                  | -0.0015 | -0.0036 | -0.0052 | -0.0054 |
| 6.4E-08 | 0.0274                                                   | 0.02595 | 0.02596 | 0.02156 | 0.02167 |
| 9.6E-08 | 0.0281                                                   | 0.02705 | 0.02581 | 0.02119 | 0.0208  |
| 1.3E-07 | 0.02705                                                  | 0.02616 | 0.02481 | 0.01945 | 0.01956 |
| 1.6E-07 | 0.02616                                                  | 0.02358 | 0.02223 | 0.01822 | 0.0181  |
| 1.9E-07 | 0.0244                                                   | 0.02359 | 0.0215  | 0.01698 | 0.01719 |
| 2.2E-07 | 0.02422                                                  | 0.02256 | 0.02116 | 0.01576 | 0.01531 |
| 2.6E-07 | 0.02276                                                  | 0.02164 | 0.01963 | 0.01449 | 0.01499 |
| 2.9E-07 | 0.02209                                                  | 0.02151 | 0.01878 | 0.01405 | 0.01398 |
| 3.2E-07 | 0.02207                                                  | 0.02003 | 0.01768 | 0.01241 | 0.01268 |
| 3.5E-07 | 0.02128                                                  | 0.01962 | 0.01591 | 0.01159 | 0.0115  |
| 3.8E-07 | 0.01953                                                  | 0.01804 | 0.01615 | 0.01045 | 0.01145 |
| 4.2E-07 | 0.0193                                                   | 0.01725 | 0.01446 | 0.01021 | 0.01068 |
| 4.5E-07 | 0.01835                                                  | 0.01671 | 0.01391 | 0.00998 | 0.01031 |
| 4.8E-07 | 0.01855                                                  | 0.01669 | 0.01269 | 0.00847 | 0.00896 |
| 5.1E-07 | 0.01753                                                  | 0.01607 | 0.01287 | 0.00867 | 0.0074  |
| 5.4E-07 | 0.01697                                                  | 0.01553 | 0.01137 | 0.00786 | 0.00749 |

|         |         |         |         |         |         |
|---------|---------|---------|---------|---------|---------|
| 5.8E-07 | 0.01553 | 0.01431 | 0.01109 | 0.00678 | 0.00741 |
| 6.1E-07 | 0.01532 | 0.0139  | 0.01056 | 0.00637 | 0.00672 |
| 6.4E-07 | 0.01448 | 0.01339 | 0.01016 | 0.00653 | 0.00652 |
| 6.7E-07 | 0.01475 | 0.01266 | 0.00944 | 0.00574 | 0.00586 |
| 7E-07   | 0.01399 | 0.01249 | 0.00844 | 0.00563 | 0.00539 |
| 7.4E-07 | 0.01424 | 0.01199 | 0.00832 | 0.00478 | 0.00463 |
| 7.7E-07 | 0.01331 | 0.01176 | 0.00836 | 0.00492 | 0.00508 |
| 8E-07   | 0.01274 | 0.01096 | 0.00736 | 0.004   | 0.00501 |
| 8.3E-07 | 0.01308 | 0.00984 | 0.00705 | 0.00305 | 0.00441 |
| 8.6E-07 | 0.01272 | 0.01025 | 0.00738 | 0.0037  | 0.00378 |
| 9E-07   | 0.01117 | 0.01015 | 0.00657 | 0.00314 | 0.00378 |
| 9.3E-07 | 0.01168 | 0.01005 | 0.00624 | 0.00262 | 0.00327 |
| 9.6E-07 | 0.01055 | 0.00944 | 0.00647 | 0.00314 | 0.00366 |
| 9.9E-07 | 0.01035 | 0.00861 | 0.00605 | 0.00276 | 0.00369 |
| 1E-06   | 0.01051 | 0.00825 | 0.0051  | 0.00277 | 0.00344 |
| 1.1E-06 | 0.00988 | 0.00877 | 0.00512 | 0.00283 | 0.00329 |
| 1.1E-06 | 0.00987 | 0.00769 | 0.0053  | 0.0021  | 0.0027  |
| 1.1E-06 | 0.00912 | 0.00778 | 0.00466 | 0.00178 | 0.00277 |
| 1.2E-06 | 0.00906 | 0.00741 | 0.00442 | 0.00155 | 0.00265 |
| 1.2E-06 | 0.00902 | 0.00756 | 0.00314 | 0.00151 | 0.00211 |
| 1.2E-06 | 0.00853 | 0.00571 | 0.00375 | 0.00128 | 0.00244 |
| 1.2E-06 | 0.0085  | 0.00647 | 0.0035  | 0.00184 | 0.00311 |
| 1.3E-06 | 0.00783 | 0.00586 | 0.00304 | 0.00067 | 0.00235 |
| 1.3E-06 | 0.00809 | 0.00654 | 0.00353 | 0.00062 | 0.00172 |
| 1.3E-06 | 0.00726 | 0.00576 | 0.00326 | 0.00069 | 0.00251 |
| 1.4E-06 | 0.00696 | 0.00605 | 0.00366 | 0.00095 | 0.00202 |
| 1.4E-06 | 0.00687 | 0.00546 | 0.00269 | -6E-05  | 0.00131 |
| 1.4E-06 | 0.00679 | 0.00542 | 0.00246 | 0.00086 | 0.00182 |
| 1.5E-06 | 0.00675 | 0.00489 | 0.00259 | 0.0008  | 0.0022  |
| 1.5E-06 | 0.00722 | 0.00556 | 0.00278 | 0.00069 | 0.00225 |
| 1.5E-06 | 0.00682 | 0.00476 | 0.00289 | 0.00113 | 0.00209 |
| 1.6E-06 | 0.00574 | 0.00526 | 0.00272 | 0.00093 | 0.00098 |
| 1.6E-06 | 0.00614 | 0.00433 | 0.00223 | 0.00028 | 0.00147 |
| 1.6E-06 | 0.00584 | 0.00477 | 0.00161 | -1E-04  | 0.00226 |
| 1.7E-06 | 0.00541 | 0.00447 | 0.00198 | -0.0004 | 0.00218 |
| 1.7E-06 | 0.00546 | 0.00455 | 0.0015  | 0.00042 | 0.0009  |
| 1.7E-06 | 0.00466 | 0.00393 | 0.002   | -0.0001 | 0.00167 |
| 1.8E-06 | 0.00533 | 0.00381 | 0.00113 | -0.0002 | 0.00155 |
| 1.8E-06 | 0.00458 | 0.00439 | 0.00117 | -9E-05  | 0.00148 |
| 1.8E-06 | 0.00476 | 0.00442 | 0.00183 | -0.001  | 0.00099 |
| 1.9E-06 | 0.00493 | 0.00359 | 0.00076 | 0.00034 | 0.00074 |
| 1.9E-06 | 0.00505 | 0.00376 | 0.00172 | -0.0003 | 0.00101 |
| 1.9E-06 | 0.00385 | 0.00421 | 0.001   | 6.2E-05 | 0.00082 |
| 2E-06   | 0.00448 | 0.00358 | 0.00172 | -0.001  | 0.0006  |
| 2E-06   | 0.00418 | 0.0034  | 0.00204 | -0.001  | 0.00048 |
| 2E-06   | 0.00494 | 0.00401 | 0.00227 | -0.0005 | 0.00044 |
| 2E-06   | 0.00326 | 0.00292 | 0.00109 | -6E-05  | 0.00117 |
| 2.1E-06 | 0.00387 | 0.00383 | 0.00158 | -0.0007 | 0.00165 |
| 2.1E-06 | 0.00394 | 0.00272 | 0.00152 | -0.0006 | 0.00101 |
| 2.1E-06 | 0.00338 | 0.00298 | 0.00055 | -0.0004 | 0.00075 |
| 2.2E-06 | 0.00329 | 0.00295 | 0.00085 | -0.0003 | 0.00089 |
| 2.2E-06 | 0.00335 | 0.00312 | 0.00087 | -0.001  | 0.00108 |
| 2.2E-06 | 0.00323 | 0.00284 | 0.00054 | -0.0005 | 0.00136 |
| 2.3E-06 | 0.00283 | 0.00269 | 0.00057 | -0.0008 | 0.00129 |

|         |         |         |         |         |         |
|---------|---------|---------|---------|---------|---------|
| 2.3E-06 | 0.00194 | 0.003   | 0.00032 | -0.0012 | 0.00125 |
| 2.3E-06 | 0.00241 | 0.00247 | 0.00102 | -0.0008 | 0.00106 |
| 2.4E-06 | 0.00294 | 0.00171 | 0.00098 | -0.0004 | 0.00156 |
| 2.4E-06 | 0.00286 | 0.00259 | 0.00029 | -0.0005 | 0.00086 |
| 2.4E-06 | 0.00223 | 0.00239 | 0.00064 | -0.0016 | 0.00115 |
| 2.5E-06 | 0.00166 | 0.00225 | 0.00081 | -0.0013 | 0.00085 |
| 2.5E-06 | 0.00144 | 0.00212 | 0.00109 | -0.0006 | 0.00095 |
| 2.5E-06 | 0.00292 | 0.00163 | 0.00084 | -0.0006 | 0.00087 |
| 2.6E-06 | 0.00168 | 0.00294 | 0.001   | 0.00027 | 0.00082 |
| 2.6E-06 | 0.00196 | 0.00197 | 0.00089 | -0.0016 | 0.00142 |
| 2.6E-06 | 0.00221 | 0.00181 | 0.00098 | -0.0005 | 0.00076 |
| 2.7E-06 | 0.00204 | 0.00158 | 0.00048 | -0.0012 | 0.00158 |
| 2.7E-06 | 0.00199 | 0.00216 | 0.00046 | -0.0015 | 0.00133 |
| 2.7E-06 | 0.00189 | 0.00194 | 0.00055 | -0.0017 | 0.00108 |
| 2.8E-06 | 0.00168 | 0.00151 | 0.00049 | -0.001  | 0.00132 |
| 2.8E-06 | 0.00173 | 0.00201 | 0.00043 | -0.0004 | 0.00096 |
| 2.8E-06 | 0.00174 | 0.00185 | 0.00064 | -0.0006 | 0.00123 |
| 2.8E-06 | 0.00156 | 0.00145 | -3E-06  | -0.0006 | 0.00137 |
| 2.9E-06 | 0.00134 | 0.00181 | 0.00053 | -0.0009 | 0.00178 |
| 2.9E-06 | 0.00185 | 0.00161 | 5.4E-05 | -0.0007 | 0.00108 |
| 2.9E-06 | 0.00181 | 0.00172 | 1.9E-05 | -0.0012 | 0.00214 |
| 3E-06   | 0.00095 | 0.00226 | 0.00017 | -0.0003 | 0.00088 |
| 3E-06   | 0.0011  | 0.0018  | 0.00062 | -0.001  | 0.00099 |
| 3E-06   | 0.00073 | 0.00183 | 0.00026 | -0.0008 | 0.00131 |
| 3.1E-06 | 0.0006  | 0.00206 | 0.00036 | -0.001  | 0.00131 |
| 3.1E-06 | 0.001   | 0.00116 | 8.3E-05 | -0.0012 | 0.00116 |
| 3.1E-06 | 0.00101 | 0.00151 | 0.00014 | -0.0008 | 0.00066 |
| 3.2E-06 | 0.00125 | 0.00113 | -0.0007 | -0.0013 | 0.00069 |
| 3.2E-06 | 0.00138 | 0.00144 | -0.0002 | -0.0011 | 0.00092 |
| 3.2E-06 | 0.00011 | 0.00119 | 0.00014 | -0.0015 | 0.0006  |
| 3.3E-06 | 0.00062 | 0.00225 | 0.00024 | -0.0012 | 0.00084 |
| 3.3E-06 | 0.00238 | 0.00153 | 0.00051 | -0.0009 | 0.00046 |
| 3.3E-06 | 0.00099 | 0.00157 | 1.4E-05 | -0.0013 | 0.00132 |
| 3.4E-06 | 0.00039 | 0.00157 | 0.00033 | -0.0011 | 0.00137 |
| 3.4E-06 | 0.00123 | 0.0019  | 0.00043 | -0.0017 | 0.00141 |
| 3.4E-06 | 0.00079 | 0.00156 | 0.0004  | -0.0006 | 0.00112 |
| 3.5E-06 | 0.0008  | 0.00128 | 0.0006  | -0.0009 | 0.00066 |
| 3.5E-06 | 0.00066 | 0.00147 | 9.2E-06 | -0.0014 | 0.00076 |
| 3.5E-06 | 0.00034 | 0.00167 | 3.3E-05 | -0.0006 | 0.00113 |
| 3.6E-06 | 0.00126 | 0.00177 | 0.00075 | -0.0007 | 0.00084 |
| 3.6E-06 | 0.0006  | 0.0019  | 0.00045 | -0.0006 | 0.00062 |
| 3.6E-06 | 0.00037 | 0.00143 | -7E-05  | -0.0008 | 0.00167 |
| 3.6E-06 | 8.8E-05 | 0.00108 | 0.00013 | -0.0017 | 0.00089 |
| 3.7E-06 | 0.00018 | 0.00116 | 5.3E-05 | -0.0015 | 0.00055 |
| 3.7E-06 | 0.00088 | 0.00114 | 0.0001  | -0.0012 | 0.00079 |
| 3.7E-06 | 0.00016 | 0.00095 | 5.8E-05 | -0.0013 | 0.00119 |
| 3.8E-06 | 0.00087 | 0.00124 | -0.0002 | -0.0019 | 0.0008  |
| 3.8E-06 | -0.0002 | 0.00093 | -0.0001 | -0.0012 | 0.00136 |
| 3.8E-06 | -0.0002 | 0.00119 | -0.0003 | -0.0014 | 0.00093 |
| 3.9E-06 | 0.00051 | 0.00128 | -3E-05  | -0.001  | 0.00056 |
| 3.9E-06 | -0.0003 | 0.00102 | -0.0003 | -0.0013 | 0.00132 |
| 3.9E-06 | -9E-05  | 0.00091 | 0.00023 | -0.0015 | 0.00049 |
| 4E-06   | 3.8E-05 | 0.00027 | 0.00048 | -0.0016 | 0.00118 |
| 4E-06   | -0.0004 | 0.00112 | 2.8E-05 | -0.0011 | 0.0007  |

|         |         |         |         |         |         |
|---------|---------|---------|---------|---------|---------|
| 4E-06   | -0.0003 | 0.00167 | 6.9E-05 | -0.0012 | 0.00102 |
| 4.1E-06 | -0.0007 | 0.0012  | -0.0001 | -0.0011 | 0.00128 |
| 4.1E-06 | -0.0001 | 0.0018  | 0.00036 | -0.0012 | 0.0011  |
| 4.1E-06 | 9.1E-05 | 0.0008  | -0.0003 | -0.0013 | 0.00099 |
| 4.2E-06 | -0.0003 | 0.00135 | -0.0005 | -0.0016 | 0.00105 |
| 4.2E-06 | -8E-05  | 0.00156 | -0.0003 | -0.0009 | 0.00052 |
| 4.2E-06 | 0.00078 | 0.00067 | -0.0007 | -0.0014 | 0.00074 |
| 4.3E-06 | -5E-05  | 0.00095 | 0.00021 | -0.0016 | 0.00121 |
| 4.3E-06 | -0.0003 | 0.00077 | 0.00018 | -0.0008 | 0.00055 |
| 4.3E-06 | -0.0008 | 0.001   | 9.5E-05 | -0.0012 | 0.00089 |
| 4.4E-06 | -0.0004 | 0.00103 | 0.00056 | -0.0009 | 0.00111 |
| 4.4E-06 | -8E-05  | 0.00155 | 7.5E-06 | -0.0012 | 0.00137 |
| 4.4E-06 | -0.0002 | 0.00094 | 3.6E-05 | -0.0014 | 0.00134 |
| 4.4E-06 | -1E-04  | 0.001   | -5E-06  | -0.0003 | 0.00095 |
| 4.5E-06 | -7E-06  | 0.00049 | 0.00013 | -0.0007 | 0.00057 |
| 4.5E-06 | -3E-05  | 0.00089 | -0.0003 | -0.0004 | 0.00172 |
| 4.5E-06 | -3E-05  | 0.00097 | 0.00039 | -0.0021 | 0.00154 |
| 4.6E-06 | -3E-05  | 0.00115 | -0.0004 | -0.0012 | 0.00125 |
| 4.6E-06 | -0.0001 | 0.00178 | -0.0003 | -0.0014 | 0.00045 |
| 4.6E-06 | 0.00022 | 0.00161 | -0.0002 | -0.0013 | 0.00126 |
| 4.7E-06 | -3E-05  | 0.00129 | 4.1E-05 | -0.0014 | 0.00042 |
| 4.7E-06 | -0.0006 | 0.00173 | -0.0004 | -0.0012 | 0.00106 |
| 4.7E-06 | -0.0008 | 0.00125 | -0.0004 | -0.0003 | 0.0009  |
| 4.8E-06 | -5E-05  | 0.00141 | -0.0006 | -0.0002 | 0.00046 |
| 4.8E-06 | 0.00011 | 0.00148 | 0.00018 | -0.0005 | 0.00112 |
| 4.8E-06 | -0.0003 | 0.00054 | -3E-05  | -0.0006 | 0.00127 |
| 4.9E-06 | -0.0006 | 0.00113 | -0.0005 | -0.0006 | 0.00157 |
| 4.9E-06 | -0.0005 | 0.00068 | -0.0007 | -0.0006 | 0.00033 |
| 4.9E-06 | -0.0012 | 0.00163 | -0.0001 | -0.0009 | 0.00026 |
| 5E-06   | -0.0006 | 0.00093 | 8.2E-05 | 3.5E-05 | 0.001   |
| 5E-06   | -0.0004 | 0.00061 | 4.5E-05 | -0.0008 | 0.00077 |
| 5E-06   | -0.0005 | 0.0013  | -0.0001 | -0.0005 | 0.00165 |
| 5.1E-06 | -0.0003 | 0.00152 | 0.0002  | -0.0006 | 0.00046 |
| 5.1E-06 | -0.0006 | 0.00134 | -0.0001 | -0.0006 | 0.00056 |
| 5.1E-06 | -0.0011 | 0.00074 | -0.0002 | -0.0011 | 0.00046 |
| 5.2E-06 | -0.0008 | 0.00133 | 0.00013 | -0.0009 | 0.00058 |
| 5.2E-06 | -0.0012 | 0.0018  | -0.0002 | -0.0016 | 0.00054 |
| 5.2E-06 | 0.00013 | 0.00223 | -0.0001 | -0.0009 | 0.00044 |
| 5.2E-06 | -0.0003 | 0.00109 | 0.00054 | -0.0012 | 0.00053 |
| 5.3E-06 | 0.00013 | 0.00061 | 0.00037 | -0.0016 | 0.00089 |
| 5.3E-06 | -7E-05  | 0.00065 | 0.00041 | -0.0011 | 0.0006  |
| 5.3E-06 | -0.0004 | 0.00122 | 1.6E-05 | -0.0018 | 0.00128 |
| 5.4E-06 | -0.0012 | -0.0001 | -0.0001 | -0.0012 | 0.00046 |
| 5.4E-06 | -0.001  | 0.00101 | -7E-05  | -0.0015 | 0.00082 |
| 5.4E-06 | -0.0005 | 0.00103 | 0.00013 | -0.0008 | 0.00195 |
| 5.5E-06 | -0.0009 | 0.00036 | -0.0007 | -0.0008 | 0.0015  |
| 5.5E-06 | -0.0008 | 0.00097 | -0.0003 | -0.0015 | 0.00072 |
| 5.5E-06 | -0.0009 | 0.00118 | 0.00054 | -0.0005 | 0.00088 |
| 5.6E-06 | -0.0005 | 0.00148 | 0.00027 | -0.0008 | 0.00054 |
| 5.6E-06 | -0.0004 | 0.00162 | 0.0007  | -0.0009 | 0.00057 |
| 5.6E-06 | -0.0007 | 0.00125 | 0.00011 | -0.0018 | 0.00193 |
| 5.7E-06 | 0.00014 | 0.00035 | -3E-05  | -0.0011 | 0.00208 |
| 5.7E-06 | -0.0003 | 0.00082 | 0.00056 | -0.001  | 0.00046 |
| 5.7E-06 | 2E-05   | 0.00119 | 0.00023 | -0.0012 | 0.00118 |

|         |         |         |         |         |         |
|---------|---------|---------|---------|---------|---------|
| 5.8E-06 | -0.0004 | 0.00056 | -0.0004 | -0.0007 | 1E-04   |
| 5.8E-06 | -0.0012 | 0.00083 | 0.00048 | -0.001  | 0.00074 |
| 5.8E-06 | -0.0008 | 0.0014  | -0.0002 | -0.0004 | 0.00148 |
| 5.9E-06 | -0.0011 | 0.0012  | -6E-05  | -0.0005 | 0.00032 |
| 5.9E-06 | -0.0004 | 0.00112 | 0.00058 | -0.0007 | 0.00094 |
| 5.9E-06 | -0.0011 | 0.00093 | -0.0002 | -0.0012 | 0.001   |
| 6E-06   | -0.0007 | 0.00091 | -0.0002 | -0.0013 | 0.00069 |
| 6E-06   | -0.0003 | 0.00131 | -0.0003 | -0.0006 | 0.00025 |
| 6E-06   | -0.0009 | 0.00079 | 0.00039 | -0.0009 | 0.00164 |
| 6E-06   | -6E-06  | 0.00116 | -0.0002 | -0.0005 | -0.0002 |
| 6.1E-06 | -0.0005 | 0.00057 | 0.00013 | -0.0016 | 0.00109 |
| 6.1E-06 | -0.0004 | 0.0013  | 0.00039 | -0.0016 | 0.00078 |
| 6.1E-06 | -0.0006 | 0.00118 | -2E-05  | -0.001  | 0.0019  |
| 6.2E-06 | -0.0008 | 0.00085 | 2.5E-05 | -0.0015 | 0.00125 |
| 6.2E-06 | -0.0004 | 0.00088 | 0.00048 | -0.0012 | 0.00025 |
| 6.2E-06 | -0.0007 | 0.00113 | -0.0008 | -0.0007 | 0.00103 |
| 6.3E-06 | -0.0008 | 0.00042 | -0.0003 | -0.0011 | 0.00038 |
| 6.3E-06 | -0.0002 | 0.00055 | -0.0002 | -0.001  | 0.00063 |
| 6.3E-06 | -0.0009 | 0.00056 | -6E-06  | -0.0012 | 0.00162 |
| 6.4E-06 | -0.0003 | 0.00032 | -0.0001 | -0.0008 | 0.0002  |
| 6.4E-06 | -1E-04  | 0.0013  | -0.0003 | -0.0005 | 0.00028 |
| 6.4E-06 | -0.0006 | 0.00086 | -0.0001 | -0.0009 | 0.00045 |
| 6.5E-06 | -0.0001 | 0.00121 | 2.5E-06 | -0.0005 | 0.00096 |
| 6.5E-06 | -0.0003 | 0.00157 | 0.00045 | -0.0001 | 0.00062 |
| 6.5E-06 | -0.0004 | 0.00163 | -0.0001 | -0.0012 | 0.00101 |
| 6.6E-06 | -0.0013 | 0.00063 | 2E-05   | -0.0017 | 0.00235 |
| 6.6E-06 | -0.0014 | 0.00071 | 0.00025 | -0.0003 | -0.0002 |
| 6.6E-06 | -0.0011 | 0.00088 | -0.0005 | -0.0016 | 0.0008  |
| 6.7E-06 | -0.0007 | 0.00084 | -1E-04  | -0.0009 | 0.00073 |
| 6.7E-06 | -0.0005 | 0.00109 | 0.00053 | -0.0013 | 0.00065 |
| 6.7E-06 | -0.001  | 0.00078 | -0.0004 | -0.001  | 0.00178 |
| 6.8E-06 | -0.0007 | 0.00093 | -0.0005 | -0.0013 | 0.00103 |
| 6.8E-06 | -3E-05  | 0.00078 | 0.00035 | -0.0011 | 0.00167 |
| 6.8E-06 | -0.0004 | 0.00155 | -0.0001 | -0.0004 | 0.00067 |
| 6.8E-06 | -0.0006 | 0.00143 | -0.0001 | -0.001  | 0.00061 |
| 6.9E-06 | -0.0006 | 0.00119 | 5.5E-06 | -0.0009 | 0.00067 |
| 6.9E-06 | -0.001  | 0.00101 | -0.001  | -0.0018 | 0.00168 |
| 6.9E-06 | -0.0009 | 0.00098 | -0.0002 | -0.0011 | 0.00085 |
| 7E-06   | -0.0007 | 0.00083 | 0.00028 | -0.001  | 0.00144 |
| 7E-06   | -0.0003 | 0.00029 | 9.5E-05 | -0.0011 | 0.00029 |
| 7E-06   | -0.0004 | 0.00087 | -0.0005 | -0.0007 | -0.0002 |
| 7.1E-06 | -0.0005 | 0.00089 | -0.0007 | -0.0005 | 0.00052 |
| 7.1E-06 | -0.0006 | 0.00103 | -0.0005 | -0.0012 | 0.00089 |
| 7.1E-06 | -0.0006 | 0.00083 | 0.00017 | -0.0007 | 0.00024 |
| 7.2E-06 | -0.001  | 0.00143 | -4E-05  | -0.0007 | 0.00049 |
| 7.2E-06 | -0.0006 | 0.00154 | 0.00051 | -0.0007 | 0.00044 |
| 7.2E-06 | -0.0004 | 0.00151 | 0.00013 | -0.0012 | 0.00068 |
| 7.3E-06 | -0.0009 | 0.00088 | 8.2E-05 | -0.0013 | 0.00033 |
| 7.3E-06 | -0.001  | 0.00108 | -0.0002 | -0.0005 | 0.00061 |
| 7.3E-06 | -0.0008 | 0.00108 | -7E-05  | -0.0008 | 0.0006  |
| 7.4E-06 | -0.0012 | 0.00084 | 0.00024 | -0.0013 | 0.00078 |
| 7.4E-06 | -0.0007 | 0.00087 | 0.00012 | -0.0015 | 0.00082 |
| 7.4E-06 | -0.0006 | 0.00108 | 0.00016 | -0.0013 | 0.00104 |
| 7.5E-06 | -0.0005 | 0.00148 | 0.00053 | -0.0013 | 0.00144 |



|         |         |         |         |         |         |
|---------|---------|---------|---------|---------|---------|
| 7.5E-06 | -0.0006 | 0.00095 | -4E-05  | -0.001  | 0.00051 |
| 7.5E-06 | -0.0002 | 0.00118 | -0.0005 | -0.0015 | 0.00083 |
| 7.6E-06 | -0.0006 | 0.00122 | -0.0002 | -0.001  | 0.00041 |
| 7.6E-06 | -0.0012 | 0.00086 | -3E-05  | -0.0015 | 0.00048 |
| 7.6E-06 | -0.0007 | 0.00149 | -0.0003 | -0.0007 | 0.00037 |
| 7.6E-06 | -0.0014 | 0.00105 | 5.8E-05 | -0.0016 | 0.00045 |
| 7.7E-06 | -0.0008 | 0.00153 | -0.0001 | -0.0013 | 5.7E-05 |
| 7.7E-06 | -0.0004 | 0.00115 | -0.0002 | -0.001  | 0.00161 |
| 7.7E-06 | -0.0002 | 0.00087 | -0.0002 | -0.0012 | 0.00045 |
| 7.8E-06 | -0.0011 | 0.00091 | -0.0004 | -0.0012 | 0.00035 |
| 7.8E-06 | -0.0004 | 0.00076 | -0.0003 | -0.0007 | 0.00083 |
| 7.8E-06 | -0.0006 | 0.00051 | -4E-05  | 7.3E-05 | 0.00081 |
| 7.9E-06 | -0.0009 | 0.00068 | -0.0001 | -0.001  | 0.00102 |
| 7.9E-06 | -0.0007 | 0.00112 | -0.001  | -0.0012 | 0.00076 |
| 7.9E-06 | -0.0006 | 0.0016  | -0.0003 | -0.0012 | 0.00075 |
| 8E-06   | -0.0008 | 0.00156 | 0.00074 | -0.0013 | 0.00155 |
| 8E-06   | -0.0004 | 0.00123 | -0.0004 | -0.0013 | 0.00074 |
| 8E-06   | -0.0006 | 0.00051 | 4.2E-05 | -0.0005 | 0.00144 |
| 8.1E-06 | -0.0011 | 0.00079 | 0.00045 | -0.0008 | 0.00151 |
| 8.1E-06 | -0.0008 | 0.00092 | -0.0008 | -0.0007 | 0.00132 |
| 8.1E-06 | -0.0017 | 0.00141 | -0.0008 | -0.0015 | 0.00106 |
| 8.2E-06 | -0.0008 | 0.00136 | -0.0003 | -0.0007 | 0.00129 |
| 8.2E-06 | -0.0004 | 0.00076 | 0.0003  | -0.0006 | 0.00076 |
| 8.2E-06 | -0.0008 | 0.00106 | 0.00021 | -0.0002 | 0.00176 |
| 8.3E-06 | -0.0008 | 0.00118 | -0.0003 | -0.0009 | 0.00118 |
| 8.3E-06 | -0.0005 | 0.00078 | -0.0003 | -0.0008 | 0.00092 |
| 8.3E-06 | -0.0003 | 0.00093 | -0.001  | -0.0014 | 0.00117 |
| 8.4E-06 | -0.0007 | 0.00093 | 0.0008  | -0.001  | 0.00094 |
| 8.4E-06 | -0.0008 | 0.00043 | 1.9E-05 | -0.0016 | 0.00083 |
| 8.4E-06 | -0.0013 | 0.00107 | 0.00028 | -0.0016 | 0.00074 |
| 8.4E-06 | -0.0004 | 0.00104 | -0.0001 | -0.0013 | 0.00041 |
| 8.5E-06 | -0.0012 | 0.00122 | -0.0004 | -0.0018 | 0.00099 |
| 8.5E-06 | -0.0012 | 0.00164 | -0.0002 | -0.0011 | 0.0012  |
| 8.5E-06 | -0.0013 | 0.0004  | -0.0004 | -0.0003 | 0.00119 |
| 8.6E-06 | -0.0014 | 0.00103 | -0.0005 | -0.001  | 0.00179 |
| 8.6E-06 | -0.0013 | 0.00067 | 2.1E-07 | -0.0011 | 0.00118 |
| 8.6E-06 | -0.0004 | 0.00023 | -0.0004 | -0.0013 | 0.0008  |
| 8.7E-06 | -0.0015 | 0.00117 | -0.0009 | -0.0008 | 0.00053 |
| 8.7E-06 | -0.0015 | 0.00027 | -0.0004 | -0.0016 | 0.00039 |
| 8.7E-06 | -0.0001 | 0.00056 | -0.0003 | -0.0002 | 0.00084 |
| 8.8E-06 | -0.0013 | 0.00044 | 9.2E-06 | -0.0018 | 0.00097 |
| 8.8E-06 | -0.0017 | -0.0006 | -0.0002 | -0.001  | 0.00033 |
| 8.8E-06 | -0.0011 | 0.0007  | 6E-05   | -0.001  | 0.0013  |
| 8.9E-06 | -0.0012 | 0.00147 | -0.0007 | -0.0015 | 0.00133 |
| 8.9E-06 | -0.0014 | 0.00128 | -0.0003 | -0.0016 | 0.0003  |
| 8.9E-06 | -0.0006 | 0.00069 | -0.0004 | -0.0011 | 0.00165 |
| 9E-06   | -0.0011 | 0.00099 | -0.0008 | -0.0001 | 0.00148 |
| 9E-06   | -7E-05  | 0.00072 | -0.0001 | -0.0008 | 0.00118 |
| 9E-06   | -0.001  | 0.00129 | -0.0004 | -0.0013 | 0.0012  |
| 9.1E-06 | -0.0006 | 0.00124 | -0.0001 | -0.0009 | 0.00044 |
| 9.1E-06 | -0.0007 | 0.00089 | -0.0004 | -0.0011 | 0.00113 |
| 9.1E-06 | -0.0005 | 0.00084 | -0.0004 | -0.0002 | 0.00094 |
| 9.2E-06 | -0.0006 | 0.00048 | -0.0005 | -0.0003 | 0.00116 |
| 9.2E-06 | -0.0011 | 0.00025 | -0.0004 | -0.0002 | 0.00093 |

|         |         |         |         |         |         |
|---------|---------|---------|---------|---------|---------|
| 9.2E-06 | -0.0011 | 0.0003  | -0.0003 | -0.0009 | 0.00102 |
| 9.2E-06 | -0.0008 | 0.00106 | -0.0004 | -0.001  | 0.00053 |
| 9.3E-06 | -0.001  | 0.00082 | -0.0007 | -0.0004 | 0.00128 |
| 9.3E-06 | 4.6E-05 | 0.00114 | -0.0002 | -0.0012 | 0.00095 |
| 9.3E-06 | -0.001  | 0.00133 | 0.00024 | -0.0019 | 0.00096 |
| 9.4E-06 | -0.0018 | 0.00082 | -0.0004 | -0.0009 | 0.00139 |
| 9.4E-06 | -0.0014 | 0.00066 | -0.0002 | -0.0017 | 0.00074 |
| 9.4E-06 | -0.0015 | 0.00053 | -0.001  | -0.0006 | 0.00073 |
| 9.5E-06 | -0.0016 | 0.00083 | 0.00013 | -0.0008 | 0.00022 |
| 9.5E-06 | -0.0011 | 0.00121 | 0.00022 | -0.0001 | 0.00136 |
| 9.5E-06 | -0.0006 | 0.00093 | 0.00039 | -0.0013 | 0.00081 |
| 9.6E-06 | -0.0011 | 0.0006  | 0.00021 | -0.0017 | 0.00113 |
| 9.6E-06 | 0.00011 | 0.00087 | 0.00028 | -0.0013 | 0.00091 |
| 9.6E-06 | -0.0011 | 0.00116 | -0.0001 | -0.0012 | 0.00037 |
| 9.7E-06 | -0.0012 | 0.00087 | 0.00014 | -0.0013 | -2E-05  |
| 9.7E-06 | -0.0015 | 0.00075 | -0.0006 | -0.0006 | 0.00074 |
| 9.7E-06 | -0.0009 | 0.00104 | -0.0012 | -0.0003 | 0.00112 |
| 9.8E-06 | -0.0013 | 0.00047 | 0.00016 | -0.0015 | 0.00034 |
| 9.8E-06 | -0.0015 | 0.00064 | -0.0005 | -0.0004 | 0.00052 |
| 9.8E-06 | -0.0012 | 0.00045 | -0.0006 | -0.0015 | 0.00041 |
| 9.9E-06 | -0.0004 | 0.00054 | -0.0004 | -0.0001 | 0.00071 |
| 9.9E-06 | -0.0015 | 0.00153 | 3.3E-05 | -0.0013 | 0.00055 |
| 9.9E-06 | -0.0006 | 0.00071 | -0.0005 | -0.0012 | 0.0006  |
| 1E-05   | -0.0015 | 0.00085 | 2.3E-05 | -0.0013 | 0.00099 |
| 1E-05   | -0.0003 | 0.00047 | 6.2E-05 | -0.0005 | 0.00051 |
| 1E-05   | -0.0019 | 0.00095 | 0.00011 | -0.0006 | 0.00063 |
| 1E-05   | -0.0011 | 0.0011  | 0.00021 | -0.0001 | 0.00144 |
| 1E-05   | -0.0012 | 0.00081 | 0.00019 | -0.0011 | 0.00059 |
| 1E-05   | -0.0005 | 0.00095 | 0.00031 | -0.001  | 0.0007  |
| 1E-05   | -0.0007 | 0.00144 | -0.0004 | -0.0012 | 0.00124 |
| 1E-05   | -0.0004 | 0.00127 | -0.0004 | -0.0011 | 0.00082 |
| 1E-05   | -0.0013 | 0.00088 | -0.0004 | -0.0014 | 0.00043 |
| 1E-05   | -0.0011 | 0.00056 | 0.00063 | -0.0014 | 0.00102 |
| 1E-05   | -0.0018 | 0.00075 | 8.7E-05 | -0.0015 | 0.00097 |
| 1E-05   | -0.0009 | 0.00139 | -0.0002 | -0.0011 | 0.0014  |
| 1E-05   | -0.0017 | 0.00076 | 0.00044 | -0.0012 | 0.0006  |
| 1E-05   | -0.0011 | 0.00039 | 0.00088 | -0.0009 | 0.00135 |
| 1E-05   | -0.0019 | 0.00021 | 7E-06   | -0.0003 | 0.00018 |
| 1E-05   | -0.002  | 3.9E-05 | -0.0003 | -0.0012 | 0.00093 |
| 1E-05   | -0.0005 | 0.0011  | 0.00076 | -0.0004 | 0.00081 |
| 1.1E-05 | -0.0009 | 0.00102 | 0.00024 | -0.0014 | 0.00052 |
| 1.1E-05 | -0.0011 | 0.00052 | 7.1E-05 | -0.0018 | 0.00028 |
| 1.1E-05 | -0.0014 | 0.00078 | -0.0004 | -0.0014 | 0.00078 |
| 1.1E-05 | -0.0002 | 0.00124 | -1E-04  | 8.7E-05 | 0.00088 |
| 1.1E-05 | -0.0013 | 0.00075 | -0.0004 | -0.0012 | 0.00089 |
| 1.1E-05 | -0.0015 | 0.00074 | 0.00019 | -0.0006 | 0.00046 |
| 1.1E-05 | -0.0006 | 0.00039 | 3.5E-05 | -0.0013 | 0.00085 |
| 1.1E-05 | -0.0019 | 0.00015 | 6.6E-05 | -0.0014 | 0.00038 |
| 1.1E-05 | -0.0008 | 0.00135 | 8.6E-05 | -0.0005 | 0.00016 |
| 1.1E-05 | -0.0007 | 0.00064 | 0.00038 | 0.00039 | -0.0002 |
| 1.1E-05 | -0.001  | 0.00046 | 0.00027 | -0.0009 | 0.0012  |
| 1.1E-05 | -0.0009 | 0.00094 | -0.0002 | -0.0008 | 0.00035 |
| 1.1E-05 | -0.0008 | 0.00061 | -0.0006 | -0.0008 | 0.00101 |
| 1.1E-05 | -0.0007 | 0.00106 | -0.0002 | -0.0008 | 0.00077 |

|         |         |         |         |         |         |
|---------|---------|---------|---------|---------|---------|
| 1.1E-05 | -0.0013 | 0.00093 | -0.0001 | -0.0006 | 0.00058 |
| 1.1E-05 | -0.0012 | 0.00012 | -1E-05  | -0.0005 | 0.00084 |
| 1.1E-05 | -0.0008 | 0.00038 | -0.0003 | -0.0002 | 0.00123 |
| 1.1E-05 | -0.0007 | 0.00069 | -0.0013 | -0.0008 | 0.00066 |
| 1.1E-05 | -0.0004 | 0.00085 | -0.0005 | -0.0002 | 0.00104 |
| 1.1E-05 | -0.0014 | 0.00069 | -0.0003 | -0.0013 | 0.00079 |
| 1.1E-05 | -0.0013 | 0.00113 | -5E-05  | -0.0013 | -2E-05  |
| 1.1E-05 | -0.0011 | 0.00103 | 1.9E-05 | -0.001  | 0.0005  |
| 1.1E-05 | -0.0012 | 0.00064 | 7.2E-05 | -0.0009 | 0.00043 |
| 1.1E-05 | -0.0007 | 0.00116 | -0.0008 | -0.0016 | 0.00017 |
| 1.1E-05 | -0.001  | 0.00089 | 0.00054 | -0.0012 | 0.00068 |
| 1.1E-05 | -0.0008 | 3.2E-05 | -0.0009 | -0.0014 | 0.00054 |
| 1.1E-05 | -0.0016 | 0.00089 | -0.0006 | -0.0022 | 0.00025 |
| 1.1E-05 | -0.001  | 0.00104 | -0.0011 | -0.0013 | 0.00106 |
| 1.1E-05 | -0.0011 | 0.0006  | 0.00041 | -0.0014 | 0.0008  |
| 1.1E-05 | -0.0005 | 0.00032 | -0.0002 | -0.0002 | 0.00056 |
| 1.1E-05 | -0.0011 | 0.00145 | -0.0004 | -0.0003 | 0.00071 |
| 1.1E-05 | -0.0008 | 0.00054 | -5E-05  | -0.0003 | 0.0009  |
| 1.2E-05 | -0.0012 | 0.00057 | -0.0002 | -0.0016 | 0.00108 |
| 1.2E-05 | -0.0013 | 0.00126 | 0.00034 | -0.0007 | 0.00074 |
| 1.2E-05 | -0.0005 | 0.00051 | 0.00034 | -0.0007 | 0.00036 |
| 1.2E-05 | -0.0007 | 9.1E-05 | -0.0008 | -0.0009 | 0.0003  |
| 1.2E-05 | -0.0004 | 0.00034 | 0.00029 | -0.0012 | 0.00048 |
| 1.2E-05 | -0.0011 | 0.00044 | -0.0009 | -0.001  | 0.00015 |
| 1.2E-05 | -0.0009 | 0.00084 | -4E-05  | -0.0008 | 0.00042 |
| 1.2E-05 | -0.0009 | 9.6E-05 | 0.00049 | -0.0026 | 0.00131 |
| 1.2E-05 | -0.0014 | 0.00094 | 0.00017 | -0.0013 | 0.00083 |
| 1.2E-05 | -0.0004 | 0.00132 | -0.0003 | -0.0015 | 0.00101 |
| 1.2E-05 | -0.0016 | 0.00084 | 0.0001  | -0.0014 | 0.00062 |
| 1.2E-05 | -0.0011 | 0.00095 | 0.00041 | -0.0008 | 0.00065 |
| 1.2E-05 | -0.001  | 0.00122 | -0.0016 | -0.0004 | 0.00096 |
| 1.2E-05 | -0.0015 | 0.00095 | 8.4E-05 | -0.0008 | 0.00046 |
| 1.2E-05 | -0.0012 | 0.00122 | -0.001  | -0.002  | 4.8E-05 |
| 1.2E-05 | -0.0011 | 0.00027 | -0.0004 | -0.0013 | 0.00064 |
| 1.2E-05 | -0.0009 | 0.00095 | -2E-05  | -0.0007 | 0.00082 |
| 1.2E-05 | -0.0011 | 0.00054 | -1E-05  | -0.0006 | 0.00024 |
| 1.2E-05 | -0.001  | 0.00108 | -0.0001 | -0.0007 | 0.00106 |
| 1.2E-05 | -0.0015 | 0.00077 | 0.00051 | -0.001  | 0.00076 |
| 1.2E-05 | -0.0015 | 0.00126 | 0.00013 | -0.0009 | 0.00022 |
| 1.2E-05 | -0.0007 | 0.00087 | 0.00021 | -0.0011 | 0.00071 |
| 1.2E-05 | -0.0015 | 0.0009  | -0.0009 | -0.0007 | 0.0009  |
| 1.2E-05 | -0.0007 | 0.00104 | -0.0008 | -0.0011 | 0.00151 |
| 1.2E-05 | -0.0004 | 0.00149 | -0.0002 | -0.0017 | 0.00048 |
| 1.2E-05 | -0.0012 | 0.00056 | 0.00012 | -0.0011 | 0.00055 |
| 1.2E-05 | -0.0008 | 0.00146 | 0.00031 | -0.0017 | -0.0001 |
| 1.2E-05 | -0.0013 | 0.00109 | 0.00051 | -0.0015 | 0.00102 |
| 1.2E-05 | -0.0005 | 0.00047 | 0.00013 | -0.0012 | 0.00011 |
| 1.2E-05 | -0.0008 | 0.00074 | -0.0006 | -0.0012 | 0.00027 |
| 1.2E-05 | -0.0007 | 0.00151 | -0.0004 | -0.001  | 0.00081 |
| 1.3E-05 | -0.0009 | 0.00118 | -1E-04  | -0.0009 | 0.00055 |
| 1.3E-05 | -0.0011 | 0.00114 | -0.0002 | -0.0013 | 0.00181 |
| 1.3E-05 | -0.0003 | 0.00054 | -0.0008 | -0.0014 | 0.00059 |
| 1.3E-05 | -0.0015 | 0.00066 | -0.0005 | -0.0009 | 0.00096 |
| 1.3E-05 | -0.0012 | 0.001   | 0.00031 | -0.0016 | 5.2E-05 |

|         |         |         |         |         |         |
|---------|---------|---------|---------|---------|---------|
| 1.3E-05 | -0.0007 | 0.00031 | -0.0005 | -0.0014 | 0.0013  |
| 1.3E-05 | -0.0011 | 0.0002  | 0.00028 | -0.0002 | 0.00058 |
| 1.3E-05 | -0.0002 | 0.00035 | 0.00072 | -0.0013 | 0.00017 |
| 1.3E-05 | -0.0007 | 0.00119 | 9.3E-05 | -0.0011 | 0.00063 |
| 1.3E-05 | -0.0009 | 7E-05   | 0.00036 | -0.0007 | 0.00016 |
| 1.3E-05 | -0.0005 | 0.00035 | -0.0001 | -0.0019 | 0.00034 |
| 1.3E-05 | -0.0008 | 0.00109 | 0.00017 | -0.0013 | 0.00117 |
| 1.3E-05 | -0.0008 | 0.00057 | -0.0005 | -0.001  | 0.00124 |
| 1.3E-05 | -0.0007 | 0.0013  | -0.0006 | -0.0016 | 0.00083 |
| 1.3E-05 | -0.0008 | 0.00098 | -0.0003 | -0.0014 | 0.00028 |
| 1.3E-05 | -0.0006 | 0.00071 | -0.0002 | -0.0011 | -9E-05  |
| 1.3E-05 | -0.0004 | 0.00107 | -0.0006 | -0.0013 | 0.00108 |
| 1.3E-05 | -0.0002 | 0.001   | -0.0009 | -8E-07  | 0.00052 |
| 1.3E-05 | -0.0007 | -6E-05  | -0.0004 | -0.0001 | -2E-05  |
| 1.3E-05 | -0.0013 | 0.00043 | -0.0008 | -0.0014 | 0.00033 |
| 1.3E-05 | -0.001  | -0.0003 | -0.0006 | -0.0019 | -0.0001 |
| 1.3E-05 | -0.0004 | 0.00046 | -0.0008 | -0.0014 | 0.00084 |
| 1.3E-05 | -0.0009 | 0.00094 | 0.00087 | -0.0013 | 0.00071 |
| 1.3E-05 | -0.0013 | 0.00093 | -0.0006 | -0.0008 | 0.00049 |
| 1.3E-05 | -0.0012 | 0.00073 | 0.0006  | -0.001  | 0.00116 |
| 1.3E-05 | -0.0012 | 0.00117 | -0.0002 | -0.0009 | 0.00076 |
| 1.3E-05 | -0.0012 | 0.0002  | -0.0002 | -0.0013 | 0.00067 |
| 1.3E-05 | -0.0017 | -0.0004 | -0.0006 | -0.0008 | -4E-05  |
| 1.3E-05 | -0.0005 | 0.00137 | 0.00024 | -0.0009 | -0.0002 |
| 1.3E-05 | -0.0005 | 0.00069 | -0.0003 | -0.0014 | 2E-05   |
| 1.3E-05 | -0.0004 | 0.00055 | -0.0001 | -0.0008 | 0.00053 |
| 1.4E-05 | -0.0006 | -0.0002 | -0.0008 | 7.2E-05 | 0.00057 |
| 1.4E-05 | -0.001  | 0.00073 | 8.5E-05 | -0.0013 | 5.6E-05 |
| 1.4E-05 | -0.0008 | 0.00036 | 0.0004  | 5.5E-05 | 0.00017 |
| 1.4E-05 | -0.0004 | 0.00048 | 0.00037 | -0.001  | 0.00099 |
| 1.4E-05 | -0.0007 | 0.00065 | -0.0002 | -0.001  | 0.00075 |
| 1.4E-05 | -0.0007 | 0.00084 | 0.00028 | -0.001  | 0.00084 |
| 1.4E-05 | -0.0014 | 0.00016 | 3.2E-05 | -0.0009 | 0.001   |
| 1.4E-05 | -0.0008 | 0.00174 | 0.00019 | -0.0017 | 0.00085 |
| 1.4E-05 | -0.0002 | 0.00063 | -4E-05  | -0.0018 | 0.00095 |
| 1.4E-05 | -0.0013 | 0.00108 | -0.0004 | -0.001  | 0.00112 |
| 1.4E-05 | -0.0008 | 0.00097 | -0.0005 | -0.0008 | 0.00052 |
| 1.4E-05 | -0.0009 | 0.00083 | -0.0004 | -0.0017 | 0.00093 |
| 1.4E-05 | -0.0008 | 0.00019 | 0.00088 | -0.0014 | 0.00093 |
| 1.4E-05 | -0.0009 | 9.3E-05 | 0.00066 | -0.0016 | 0.00056 |
| 1.4E-05 | -0.0008 | 0.0002  | -0.0008 | -0.0006 | 0.00057 |
| 1.4E-05 | -0.0007 | 0.00011 | -0.0011 | -0.0005 | 0.00022 |
| 1.4E-05 | -0.0009 | 0.00043 | -0.0009 | -0.0016 | 0.00025 |
| 1.4E-05 | -0.001  | 0.0008  | -0.0007 | -0.0014 | 0.00034 |
| 1.4E-05 | -0.0005 | 0.0004  | -0.0001 | -0.0011 | 0.00117 |
| 1.4E-05 | -0.0009 | 0.00113 | -0.0003 | -0.0009 | 0.00131 |
| 1.4E-05 | -0.0007 | 0.00083 | -0.0001 | -0.0004 | 0.00074 |
| 1.4E-05 | -0.0011 | 0.00074 | 0.00029 | -0.0009 | 0.0009  |
| 1.4E-05 | -0.0011 | 0.00067 | -0.0005 | -0.0011 | 0.00044 |
| 1.4E-05 | -0.0006 | 0.00073 | 0.00029 | -0.0007 | -1E-04  |
| 1.4E-05 | -0.0007 | 0.00054 | -0.0004 | -0.0009 | 0.00096 |
| 1.4E-05 | -0.0003 | 0.00038 | -0.0005 | -0.0015 | 0.00067 |
| 1.4E-05 | -0.0002 | 0.0012  | -0.0009 | -0.0008 | 0.00096 |
| 1.4E-05 | -0.0008 | 0.00069 | 0.00037 | -0.0016 | 0.00069 |

|         |         |         |         |         |         |
|---------|---------|---------|---------|---------|---------|
| 1.4E-05 | -0.0014 | 0.00073 | -0.0002 | -0.001  | 0.00084 |
| 1.4E-05 | -0.0015 | 0.00156 | -0.0004 | -0.0009 | 0.00073 |
| 1.4E-05 | -0.0011 | 0.0012  | -0.0004 | -0.0015 | 0.00086 |
| 1.5E-05 | -0.0009 | 0.00062 | -0.0012 | -6E-05  | 0.00056 |
| 1.5E-05 | -0.0008 | 5.6E-06 | -0.0006 | -0.0009 | 0.00065 |
| 1.5E-05 | -0.0005 | 0.00074 | -0.0011 | -0.0011 | 0.00094 |
| 1.5E-05 | -0.0005 | 0.00062 | -0.0003 | -0.0011 | 0.00085 |
| 1.5E-05 | -0.0009 | 0.0006  | -7E-05  | -0.0017 | 0.00109 |
| 1.5E-05 | -0.0007 | 0.00043 | -0.0005 | -0.0014 | 1.9E-05 |
| 1.5E-05 | -0.0005 | 0.00061 | 7.7E-05 | -0.0017 | 0.00097 |
| 1.5E-05 | -0.0007 | 0.0006  | -0.0007 | -0.0011 | -0.0002 |
| 1.5E-05 | -0.0009 | 0.00091 | -0.0011 | -0.0013 | 0.00049 |
| 1.5E-05 | -0.0004 | 0.00081 | 0.00026 | -0.0013 | -4E-05  |
| 1.5E-05 | -0.0005 | 0.00049 | -0.0003 | -0.0014 | 0.00031 |
| 1.5E-05 | -0.0013 | 0.00025 | -0.0009 | -0.0009 | 0.00144 |
| 1.5E-05 | -0.001  | 0.00043 | -0.0004 | -0.0009 | 0.00094 |
| 1.5E-05 | -0.0004 | 0.00023 | -1E-04  | -0.0013 | 0.00074 |
| 1.5E-05 | -0.0006 | 0.00105 | 3.3E-05 | -0.0014 | 0.0005  |
| 1.5E-05 | -0.0006 | 0.0008  | -0.0006 | -0.0017 | 0.00081 |

**Table SI.15B:** Primary kinetic data for the reaction of 1,3-dimethyl-2-imidazolidinone (**S15**) with CumO• generated by 355 nm LFP in DMSO (**Figure SI.15B**).

| t / s     | $\Delta A$ 1,3-dimethyl-2-imidazolidinone ( <b>S15</b> ) |           |           |           |           |
|-----------|----------------------------------------------------------|-----------|-----------|-----------|-----------|
|           | 3.92 mM                                                  | 8.6 mM    | 13.9 mM   | 19.8 mM   | 26.1 mM   |
| -9.92E-07 | -9.94E-05                                                | 2.95E-04  | -3.41E-04 | -4.27E-04 | -1.44E-04 |
| -9.60E-07 | -1.98E-04                                                | 3.18E-04  | -1.02E-04 | -2.35E-04 | -5.42E-04 |
| -9.28E-07 | -4.57E-04                                                | 5.57E-04  | -3.95E-04 | -2.31E-04 | -1.99E-04 |
| -8.96E-07 | -2.40E-04                                                | 2.62E-04  | -3.10E-04 | -6.66E-04 | -7.29E-04 |
| -8.64E-07 | 2.64E-04                                                 | 3.24E-04  | 1.49E-04  | -3.54E-04 | -9.14E-04 |
| -8.32E-07 | -2.74E-04                                                | -7.53E-05 | 4.24E-05  | -8.97E-04 | -4.87E-04 |
| -8.00E-07 | 2.01E-04                                                 | 2.20E-04  | 1.15E-04  | -3.88E-04 | -4.34E-04 |
| -7.68E-07 | 3.00E-04                                                 | 2.93E-04  | -1.10E-04 | -6.68E-04 | -4.34E-04 |
| -7.36E-07 | -1.52E-04                                                | 1.22E-04  | -4.83E-04 | -2.71E-04 | -2.37E-04 |
| -7.04E-07 | -2.98E-04                                                | -2.63E-04 | -3.44E-04 | -4.99E-04 | -4.05E-04 |
| -6.72E-07 | 1.13E-04                                                 | 8.68E-05  | 1.34E-04  | -3.48E-04 | -1.32E-04 |
| -6.40E-07 | 2.24E-06                                                 | -7.75E-05 | 4.72E-05  | -2.52E-04 | -6.14E-04 |
| -6.08E-07 | 1.78E-04                                                 | 1.17E-04  | 4.30E-04  | -6.27E-04 | 1.15E-04  |
| -5.76E-07 | -1.47E-04                                                | 1.21E-04  | -3.56E-05 | -4.92E-04 | -3.20E-04 |
| -5.44E-07 | -4.64E-06                                                | 5.49E-04  | -5.51E-04 | -2.35E-04 | -5.85E-04 |
| -5.12E-07 | -6.18E-04                                                | 3.77E-04  | -2.29E-04 | 2.70E-05  | -3.13E-04 |
| -4.80E-07 | -8.30E-04                                                | 3.81E-04  | -1.14E-03 | -2.83E-04 | -1.01E-03 |
| -4.48E-07 | -6.51E-05                                                | 5.41E-05  | 1.27E-04  | -4.84E-04 | -5.93E-04 |
| -4.16E-07 | -5.27E-04                                                | 1.18E-04  | -5.42E-04 | -5.32E-04 | -2.13E-04 |
| -3.84E-07 | -2.73E-04                                                | 2.71E-04  | -4.81E-04 | -4.86E-05 | -1.54E-04 |
| -3.52E-07 | -8.30E-05                                                | -1.14E-04 | -6.34E-04 | -6.29E-04 | -8.26E-04 |
| -3.20E-07 | -5.32E-04                                                | -1.13E-04 | -4.15E-06 | -4.98E-04 | -2.10E-04 |
| -2.88E-07 | -8.42E-05                                                | 8.85E-05  | -1.76E-04 | -2.66E-04 | -9.43E-04 |
| -2.56E-07 | -7.77E-04                                                | 2.95E-05  | 1.29E-04  | -2.59E-04 | -5.60E-04 |
| -2.24E-07 | -2.34E-04                                                | 3.80E-04  | 2.14E-05  | -4.63E-04 | -2.22E-04 |
| -1.92E-07 | -3.08E-04                                                | 8.41E-05  | 1.36E-04  | -1.66E-04 | -3.36E-04 |
| -1.60E-07 | -4.63E-04                                                | 3.64E-05  | -4.08E-04 | 3.32E-04  | 8.04E-05  |
| -1.28E-07 | -2.31E-04                                                | -2.26E-05 | -1.99E-04 | -6.05E-04 | -7.77E-05 |
| -9.63E-08 | -8.39E-05                                                | 5.24E-05  | -2.47E-04 | -3.06E-04 | 1.05E-04  |
| -6.43E-08 | -2.02E-06                                                | 9.77E-05  | -1.84E-04 | -4.66E-04 | 7.08E-04  |
| -3.23E-08 | 5.29E-05                                                 | -1.84E-04 | 7.75E-05  | -3.74E-05 | -3.65E-04 |
| -3.16E-10 | -2.77E-03                                                | -2.88E-03 | -3.12E-03 | -2.73E-03 | -2.87E-03 |
| 3.17E-08  | -8.93E-03                                                | -9.15E-03 | -1.12E-02 | -9.95E-03 | -9.26E-03 |
| 6.37E-08  | 1.51E-02                                                 | 1.51E-02  | 1.46E-02  | 1.48E-02  | 1.32E-02  |
| 9.57E-08  | 1.58E-02                                                 | 1.56E-02  | 1.51E-02  | 1.49E-02  | 1.34E-02  |
| 1.28E-07  | 1.54E-02                                                 | 1.51E-02  | 1.44E-02  | 1.41E-02  | 1.29E-02  |
| 1.60E-07  | 1.48E-02                                                 | 1.50E-02  | 1.35E-02  | 1.32E-02  | 1.13E-02  |
| 1.92E-07  | 1.46E-02                                                 | 1.43E-02  | 1.27E-02  | 1.32E-02  | 1.09E-02  |
| 2.24E-07  | 1.40E-02                                                 | 1.38E-02  | 1.28E-02  | 1.22E-02  | 1.05E-02  |
| 2.56E-07  | 1.34E-02                                                 | 1.34E-02  | 1.18E-02  | 1.18E-02  | 9.63E-03  |
| 2.88E-07  | 1.38E-02                                                 | 1.30E-02  | 1.10E-02  | 1.03E-02  | 9.27E-03  |
| 3.20E-07  | 1.31E-02                                                 | 1.26E-02  | 1.10E-02  | 1.07E-02  | 8.78E-03  |
| 3.52E-07  | 1.24E-02                                                 | 1.20E-02  | 1.03E-02  | 9.77E-03  | 8.10E-03  |
| 3.84E-07  | 1.19E-02                                                 | 1.20E-02  | 1.03E-02  | 8.84E-03  | 7.84E-03  |
| 4.16E-07  | 1.16E-02                                                 | 1.12E-02  | 9.00E-03  | 9.23E-03  | 7.04E-03  |
| 4.48E-07  | 1.11E-02                                                 | 1.08E-02  | 9.64E-03  | 8.83E-03  | 6.65E-03  |
| 4.80E-07  | 1.11E-02                                                 | 1.11E-02  | 8.26E-03  | 7.73E-03  | 6.55E-03  |
| 5.12E-07  | 1.14E-02                                                 | 1.03E-02  | 8.36E-03  | 7.17E-03  | 6.42E-03  |
| 5.44E-07  | 1.04E-02                                                 | 1.02E-02  | 7.74E-03  | 7.04E-03  | 5.79E-03  |

|          |          |          |          |           |          |
|----------|----------|----------|----------|-----------|----------|
| 5.76E-07 | 1.06E-02 | 9.53E-03 | 6.88E-03 | 6.96E-03  | 5.11E-03 |
| 6.08E-07 | 9.69E-03 | 9.00E-03 | 6.64E-03 | 6.40E-03  | 4.52E-03 |
| 6.40E-07 | 9.24E-03 | 8.92E-03 | 7.11E-03 | 6.36E-03  | 5.06E-03 |
| 6.72E-07 | 9.29E-03 | 8.85E-03 | 6.30E-03 | 6.40E-03  | 4.73E-03 |
| 7.04E-07 | 9.09E-03 | 7.78E-03 | 6.41E-03 | 5.82E-03  | 4.37E-03 |
| 7.36E-07 | 9.00E-03 | 7.80E-03 | 6.71E-03 | 4.70E-03  | 3.51E-03 |
| 7.68E-07 | 7.88E-03 | 7.67E-03 | 6.42E-03 | 5.12E-03  | 3.61E-03 |
| 8.00E-07 | 7.85E-03 | 7.80E-03 | 5.25E-03 | 4.81E-03  | 3.94E-03 |
| 8.32E-07 | 7.57E-03 | 7.82E-03 | 5.10E-03 | 4.25E-03  | 3.13E-03 |
| 8.64E-07 | 7.92E-03 | 7.31E-03 | 4.91E-03 | 3.93E-03  | 3.46E-03 |
| 8.96E-07 | 7.77E-03 | 7.32E-03 | 5.17E-03 | 3.86E-03  | 3.21E-03 |
| 9.28E-07 | 6.50E-03 | 6.96E-03 | 4.36E-03 | 3.86E-03  | 2.70E-03 |
| 9.60E-07 | 6.27E-03 | 6.61E-03 | 4.22E-03 | 4.00E-03  | 2.63E-03 |
| 9.92E-07 | 6.22E-03 | 5.84E-03 | 4.20E-03 | 3.81E-03  | 2.44E-03 |
| 1.02E-06 | 6.17E-03 | 5.91E-03 | 3.81E-03 | 3.31E-03  | 2.54E-03 |
| 1.06E-06 | 6.18E-03 | 5.57E-03 | 4.23E-03 | 2.96E-03  | 2.79E-03 |
| 1.09E-06 | 5.68E-03 | 5.53E-03 | 4.03E-03 | 2.87E-03  | 2.44E-03 |
| 1.12E-06 | 5.17E-03 | 5.64E-03 | 3.78E-03 | 2.92E-03  | 2.06E-03 |
| 1.15E-06 | 5.38E-03 | 5.77E-03 | 3.60E-03 | 2.49E-03  | 1.66E-03 |
| 1.18E-06 | 5.36E-03 | 5.54E-03 | 3.34E-03 | 2.43E-03  | 1.35E-03 |
| 1.22E-06 | 5.97E-03 | 5.39E-03 | 3.54E-03 | 2.52E-03  | 1.91E-03 |
| 1.25E-06 | 5.41E-03 | 5.29E-03 | 3.07E-03 | 2.50E-03  | 1.74E-03 |
| 1.28E-06 | 4.65E-03 | 5.09E-03 | 3.05E-03 | 2.09E-03  | 1.52E-03 |
| 1.31E-06 | 5.21E-03 | 4.33E-03 | 2.47E-03 | 2.33E-03  | 1.75E-03 |
| 1.34E-06 | 4.72E-03 | 5.03E-03 | 3.45E-03 | 2.32E-03  | 1.11E-03 |
| 1.38E-06 | 4.93E-03 | 4.68E-03 | 2.86E-03 | 1.40E-03  | 2.02E-03 |
| 1.41E-06 | 4.83E-03 | 4.02E-03 | 2.95E-03 | 3.03E-03  | 2.22E-03 |
| 1.44E-06 | 4.33E-03 | 4.51E-03 | 2.02E-03 | 2.49E-03  | 1.42E-03 |
| 1.47E-06 | 4.76E-03 | 5.01E-03 | 2.41E-03 | 1.63E-03  | 1.34E-03 |
| 1.50E-06 | 4.27E-03 | 4.11E-03 | 2.75E-03 | 1.36E-03  | 1.02E-03 |
| 1.54E-06 | 3.94E-03 | 4.49E-03 | 2.55E-03 | 1.38E-03  | 6.72E-04 |
| 1.57E-06 | 4.39E-03 | 3.64E-03 | 2.07E-03 | 1.06E-03  | 1.02E-03 |
| 1.60E-06 | 3.42E-03 | 3.43E-03 | 3.31E-03 | 1.21E-03  | 8.66E-04 |
| 1.63E-06 | 4.27E-03 | 3.92E-03 | 2.44E-03 | 1.21E-03  | 6.32E-04 |
| 1.66E-06 | 3.64E-03 | 3.87E-03 | 1.93E-03 | 1.45E-03  | 1.10E-03 |
| 1.70E-06 | 3.47E-03 | 3.47E-03 | 1.62E-03 | 1.96E-03  | 8.11E-04 |
| 1.73E-06 | 3.30E-03 | 3.77E-03 | 1.76E-03 | 1.74E-03  | 7.09E-04 |
| 1.76E-06 | 3.61E-03 | 3.43E-03 | 2.51E-03 | 1.37E-03  | 7.61E-04 |
| 1.79E-06 | 3.28E-03 | 3.41E-03 | 1.74E-03 | 1.03E-03  | 5.98E-04 |
| 1.82E-06 | 3.23E-03 | 2.99E-03 | 1.51E-03 | 1.11E-03  | 1.02E-03 |
| 1.86E-06 | 3.13E-03 | 2.81E-03 | 1.97E-03 | 8.16E-04  | 1.01E-03 |
| 1.89E-06 | 2.73E-03 | 3.30E-03 | 1.07E-03 | 9.36E-04  | 7.47E-04 |
| 1.92E-06 | 2.55E-03 | 3.35E-03 | 1.45E-03 | 1.16E-03  | 7.42E-04 |
| 1.95E-06 | 3.39E-03 | 3.31E-03 | 6.20E-04 | 5.83E-04  | 6.84E-04 |
| 1.98E-06 | 2.47E-03 | 2.57E-03 | 1.35E-03 | 1.30E-03  | 9.47E-04 |
| 2.02E-06 | 2.84E-03 | 3.25E-03 | 1.71E-03 | 1.26E-03  | 6.96E-04 |
| 2.05E-06 | 2.60E-03 | 3.19E-03 | 9.92E-04 | 1.05E-03  | 4.81E-04 |
| 2.08E-06 | 2.67E-03 | 2.89E-03 | 1.14E-03 | 8.09E-04  | 1.39E-04 |
| 2.11E-06 | 2.47E-03 | 2.74E-03 | 1.14E-03 | 8.62E-04  | 2.43E-04 |
| 2.14E-06 | 2.28E-03 | 2.41E-03 | 1.05E-03 | 7.89E-04  | 1.10E-03 |
| 2.18E-06 | 1.71E-03 | 1.97E-03 | 9.19E-04 | 1.05E-03  | 5.77E-04 |
| 2.21E-06 | 2.09E-03 | 2.55E-03 | 1.24E-03 | 1.26E-03  | 2.73E-04 |
| 2.24E-06 | 2.70E-03 | 2.72E-03 | 1.39E-03 | -1.01E-04 | 7.42E-04 |
| 2.27E-06 | 2.41E-03 | 2.56E-03 | 1.15E-03 | 8.03E-04  | 1.34E-04 |

|          |          |          |          |           |           |
|----------|----------|----------|----------|-----------|-----------|
| 2.30E-06 | 2.52E-03 | 2.29E-03 | 7.28E-04 | 6.91E-04  | 5.99E-04  |
| 2.34E-06 | 2.37E-03 | 2.90E-03 | 7.81E-04 | 7.25E-04  | 5.74E-04  |
| 2.37E-06 | 3.12E-03 | 2.90E-03 | 6.27E-04 | 7.66E-04  | 5.39E-04  |
| 2.40E-06 | 1.94E-03 | 2.62E-03 | 9.44E-04 | 9.74E-04  | 2.80E-04  |
| 2.43E-06 | 2.03E-03 | 2.32E-03 | 1.02E-03 | 9.38E-04  | 3.35E-04  |
| 2.46E-06 | 1.69E-03 | 2.19E-03 | 6.65E-04 | 6.63E-04  | 1.49E-04  |
| 2.50E-06 | 2.82E-03 | 2.01E-03 | 1.24E-03 | 8.55E-04  | 9.95E-05  |
| 2.53E-06 | 2.21E-03 | 2.28E-03 | 8.03E-04 | 8.00E-04  | 9.93E-04  |
| 2.56E-06 | 2.02E-03 | 2.63E-03 | 5.60E-04 | 7.95E-04  | 4.52E-04  |
| 2.59E-06 | 1.32E-03 | 2.00E-03 | 7.34E-04 | 1.05E-03  | 7.68E-04  |
| 2.62E-06 | 1.47E-03 | 3.05E-03 | 6.68E-04 | 1.18E-03  | -6.06E-05 |
| 2.66E-06 | 2.13E-03 | 2.42E-03 | 2.92E-04 | 6.75E-04  | 3.35E-04  |
| 2.69E-06 | 2.04E-03 | 2.67E-03 | 6.62E-04 | 3.33E-04  | 2.71E-04  |
| 2.72E-06 | 2.28E-03 | 2.45E-03 | 8.29E-04 | 7.63E-04  | 3.41E-05  |
| 2.75E-06 | 1.75E-03 | 2.19E-03 | 5.70E-04 | 1.06E-03  | 6.50E-04  |
| 2.78E-06 | 1.40E-03 | 2.44E-03 | 9.03E-04 | 8.75E-04  | 6.53E-04  |
| 2.82E-06 | 1.30E-03 | 1.80E-03 | 1.16E-03 | 4.75E-04  | 4.98E-04  |
| 2.85E-06 | 1.48E-03 | 2.56E-03 | 5.78E-04 | 5.26E-04  | 5.35E-04  |
| 2.88E-06 | 1.85E-03 | 2.48E-03 | 6.05E-04 | 6.71E-04  | 6.01E-04  |
| 2.91E-06 | 1.47E-03 | 1.56E-03 | 7.98E-04 | 5.05E-04  | 6.91E-04  |
| 2.94E-06 | 1.46E-03 | 2.20E-03 | 9.02E-05 | 6.55E-04  | 4.36E-04  |
| 2.98E-06 | 1.11E-03 | 1.87E-03 | 7.95E-04 | 2.31E-04  | 2.50E-04  |
| 3.01E-06 | 1.08E-03 | 1.83E-03 | 6.40E-04 | 4.31E-04  | 8.07E-04  |
| 3.04E-06 | 9.83E-04 | 1.57E-03 | 5.41E-04 | 4.26E-04  | 1.18E-04  |
| 3.07E-06 | 8.43E-04 | 1.31E-03 | 7.28E-04 | 4.26E-04  | 4.83E-04  |
| 3.10E-06 | 1.02E-03 | 2.12E-03 | 3.22E-04 | 5.13E-04  | 5.10E-04  |
| 3.14E-06 | 7.84E-04 | 1.57E-03 | 4.13E-04 | 3.20E-04  | 6.84E-04  |
| 3.17E-06 | 8.29E-04 | 1.24E-03 | 7.35E-04 | 2.31E-04  | 3.51E-04  |
| 3.20E-06 | 1.34E-03 | 1.79E-03 | 5.67E-04 | 4.52E-04  | 4.64E-04  |
| 3.23E-06 | 1.48E-03 | 1.73E-03 | 1.18E-03 | 2.47E-04  | 5.44E-04  |
| 3.26E-06 | 1.38E-03 | 1.85E-03 | 7.84E-04 | 7.02E-04  | 5.20E-04  |
| 3.30E-06 | 1.05E-03 | 1.91E-03 | 5.76E-04 | 1.34E-04  | 4.49E-04  |
| 3.33E-06 | 1.33E-03 | 1.86E-03 | 4.36E-04 | 1.84E-04  | 9.53E-04  |
| 3.36E-06 | 1.00E-03 | 1.37E-03 | 4.39E-04 | 6.87E-04  | 3.42E-04  |
| 3.39E-06 | 7.61E-04 | 1.29E-03 | 5.57E-05 | 2.68E-04  | 6.28E-04  |
| 3.42E-06 | 1.08E-03 | 1.99E-03 | 3.57E-04 | 5.10E-04  | 6.54E-04  |
| 3.46E-06 | 7.34E-04 | 1.27E-03 | 2.36E-04 | 2.06E-04  | 3.93E-04  |
| 3.49E-06 | 1.29E-03 | 1.25E-03 | 4.19E-04 | 2.71E-04  | 6.48E-04  |
| 3.52E-06 | 8.93E-04 | 8.34E-04 | 4.87E-04 | 1.31E-03  | 3.20E-04  |
| 3.55E-06 | 4.99E-04 | 1.38E-03 | 5.05E-04 | 2.21E-04  | 6.33E-04  |
| 3.58E-06 | 5.88E-04 | 1.08E-03 | 6.22E-04 | -1.76E-04 | 5.35E-04  |
| 3.62E-06 | 8.05E-04 | 1.28E-03 | 2.09E-04 | 2.64E-04  | 4.41E-04  |
| 3.65E-06 | 3.57E-04 | 1.07E-03 | 4.34E-04 | 2.64E-04  | 4.23E-04  |
| 3.68E-06 | 4.41E-04 | 1.11E-03 | 3.11E-04 | 5.74E-04  | 5.77E-04  |
| 3.71E-06 | 7.76E-04 | 1.30E-03 | 4.10E-04 | -4.23E-05 | -8.77E-05 |
| 3.74E-06 | 9.33E-04 | 1.52E-03 | 3.86E-04 | 1.95E-04  | 4.76E-04  |
| 3.78E-06 | 6.78E-04 | 1.52E-03 | 5.79E-04 | 4.71E-04  | 1.14E-04  |
| 3.81E-06 | 5.28E-04 | 2.26E-03 | 5.60E-04 | 6.72E-04  | 6.04E-04  |
| 3.84E-06 | 8.05E-04 | 1.94E-03 | 1.80E-04 | 3.76E-04  | 1.91E-04  |
| 3.87E-06 | 9.40E-04 | 2.18E-03 | 7.06E-04 | 4.83E-04  | 5.18E-04  |
| 3.90E-06 | 8.37E-04 | 1.01E-03 | 3.21E-04 | 2.05E-04  | 6.39E-04  |
| 3.94E-06 | 1.11E-03 | 1.28E-03 | 5.88E-04 | 1.45E-04  | 7.13E-04  |
| 3.97E-06 | 5.76E-04 | 1.40E-03 | 6.54E-04 | 3.06E-04  | 3.23E-04  |
| 4.00E-06 | 5.11E-04 | 1.32E-03 | 2.98E-04 | 1.04E-03  | 6.62E-04  |



|          |          |          |           |           |           |
|----------|----------|----------|-----------|-----------|-----------|
| 4.03E-06 | 4.92E-04 | 1.55E-03 | 1.84E-04  | 4.45E-04  | 5.88E-04  |
| 4.06E-06 | 4.25E-04 | 1.62E-03 | 5.89E-04  | 7.07E-05  | 9.34E-05  |
| 4.10E-06 | 1.01E-03 | 1.37E-03 | 3.58E-04  | 5.34E-04  | 2.32E-04  |
| 4.13E-06 | 8.53E-04 | 1.62E-03 | 5.45E-04  | 7.46E-05  | 6.37E-04  |
| 4.16E-06 | 5.74E-04 | 1.65E-03 | 4.23E-04  | 4.73E-04  | 2.56E-04  |
| 4.19E-06 | 9.06E-04 | 1.63E-03 | 3.86E-04  | 5.32E-04  | 4.53E-04  |
| 4.22E-06 | 5.23E-04 | 1.75E-03 | 3.55E-04  | 7.11E-04  | 6.65E-04  |
| 4.26E-06 | 1.22E-03 | 1.53E-03 | 3.62E-04  | 8.92E-04  | 1.46E-04  |
| 4.29E-06 | 1.07E-03 | 1.99E-03 | 5.87E-04  | 6.69E-04  | 6.52E-04  |
| 4.32E-06 | 3.58E-04 | 1.81E-03 | 3.35E-04  | 7.56E-04  | -2.13E-04 |
| 4.35E-06 | 6.85E-04 | 1.27E-03 | 4.08E-04  | 2.06E-04  | 6.65E-05  |
| 4.38E-06 | 5.56E-04 | 1.86E-03 | 3.94E-04  | 1.94E-04  | 6.68E-04  |
| 4.42E-06 | 5.37E-04 | 1.15E-03 | 8.24E-04  | -8.22E-05 | 2.82E-04  |
| 4.45E-06 | 8.86E-04 | 1.31E-03 | 4.42E-04  | 7.43E-04  | 2.92E-04  |
| 4.48E-06 | 3.54E-04 | 1.37E-03 | 4.79E-04  | 3.66E-04  | 5.93E-04  |
| 4.51E-06 | 3.85E-04 | 1.76E-03 | 1.70E-04  | 1.06E-04  | 7.01E-04  |
| 4.54E-06 | 1.08E-03 | 1.36E-03 | 2.70E-04  | 3.43E-04  | 2.72E-04  |
| 4.58E-06 | 6.08E-04 | 1.61E-03 | 4.01E-04  | 5.88E-04  | 7.16E-04  |
| 4.61E-06 | 4.74E-04 | 1.49E-03 | 3.40E-04  | 6.85E-04  | 4.46E-04  |
| 4.64E-06 | 1.28E-03 | 1.35E-03 | -1.44E-04 | 7.32E-05  | 6.42E-04  |
| 4.67E-06 | 3.62E-04 | 1.90E-03 | 4.28E-04  | 6.10E-04  | 1.11E-04  |
| 4.70E-06 | 3.03E-04 | 1.81E-03 | 4.84E-04  | 4.47E-04  | 5.42E-04  |
| 4.74E-06 | 4.07E-04 | 1.85E-03 | 8.41E-04  | -1.37E-04 | 7.37E-05  |
| 4.77E-06 | 6.74E-04 | 1.82E-03 | 5.19E-04  | 2.60E-04  | 2.31E-04  |
| 4.80E-06 | 6.41E-04 | 1.71E-03 | 6.04E-04  | 3.24E-04  | 2.22E-04  |
| 4.83E-06 | 4.21E-04 | 1.76E-03 | 2.95E-04  | 5.16E-04  | 1.85E-04  |
| 4.86E-06 | 3.95E-04 | 1.40E-03 | 3.23E-04  | 5.85E-04  | 5.49E-04  |
| 4.90E-06 | 1.12E-03 | 1.45E-03 | 5.53E-04  | 1.74E-04  | 3.85E-04  |
| 4.93E-06 | 4.52E-04 | 1.66E-03 | 4.35E-04  | 3.26E-04  | 4.84E-04  |
| 4.96E-06 | 5.72E-04 | 1.39E-03 | 2.92E-04  | 6.23E-04  | 8.65E-04  |
| 4.99E-06 | 7.01E-04 | 1.95E-03 | 3.43E-04  | -2.82E-05 | 3.39E-04  |
| 5.02E-06 | 4.60E-04 | 1.48E-03 | 2.62E-04  | 4.61E-04  | 9.54E-05  |
| 5.06E-06 | 1.14E-03 | 1.85E-03 | 2.32E-04  | 7.73E-04  | -7.07E-05 |
| 5.09E-06 | 7.23E-04 | 1.44E-03 | 2.39E-04  | 3.72E-04  | 8.02E-04  |
| 5.12E-06 | 6.07E-04 | 1.92E-03 | 1.46E-04  | 3.74E-04  | -5.80E-05 |
| 5.15E-06 | 1.38E-03 | 1.37E-03 | 5.44E-04  | 5.76E-04  | 5.75E-04  |
| 5.18E-06 | 6.09E-04 | 1.80E-03 | 4.28E-04  | 5.91E-04  | 6.66E-04  |
| 5.22E-06 | 6.59E-04 | 1.80E-03 | 5.50E-04  | 3.86E-04  | 8.19E-04  |
| 5.25E-06 | 9.72E-04 | 1.57E-03 | -2.03E-04 | 7.08E-04  | 3.62E-04  |
| 5.28E-06 | 8.29E-04 | 1.33E-03 | 7.67E-04  | 6.44E-04  | 2.23E-04  |
| 5.31E-06 | 1.14E-03 | 1.38E-03 | 3.32E-04  | 6.43E-04  | 6.08E-04  |
| 5.34E-06 | 9.48E-04 | 9.50E-04 | 2.60E-04  | 8.85E-06  | 2.77E-04  |
| 5.38E-06 | 6.53E-04 | 1.29E-03 | 4.75E-04  | 2.39E-04  | 5.95E-04  |
| 5.41E-06 | 1.10E-03 | 1.36E-03 | 1.66E-04  | 5.37E-04  | 5.51E-04  |
| 5.44E-06 | 8.94E-04 | 1.96E-03 | 1.82E-04  | 5.44E-04  | 3.21E-04  |
| 5.47E-06 | 7.24E-04 | 1.84E-03 | 2.28E-04  | 5.22E-04  | 2.61E-04  |
| 5.50E-06 | 4.27E-04 | 1.24E-03 | 3.15E-04  | 4.64E-04  | 3.20E-04  |
| 5.54E-06 | 2.40E-04 | 1.43E-03 | 5.18E-04  | 4.36E-04  | 5.50E-04  |
| 5.57E-06 | 5.31E-04 | 1.46E-03 | 1.65E-04  | 5.81E-04  | 5.31E-04  |
| 5.60E-06 | 5.31E-04 | 1.49E-03 | 6.08E-04  | 7.44E-04  | 1.78E-04  |
| 5.63E-06 | 4.45E-04 | 1.82E-03 | 7.11E-04  | 3.96E-04  | 5.31E-04  |
| 5.66E-06 | 2.98E-04 | 2.04E-03 | 4.07E-04  | 1.39E-04  | 4.97E-04  |
| 5.70E-06 | 4.59E-04 | 1.93E-03 | 4.07E-04  | 5.72E-04  | 2.50E-04  |
| 5.73E-06 | 1.05E-03 | 1.52E-03 | 3.52E-04  | 1.01E-04  | 2.81E-04  |

|          |           |          |           |           |           |
|----------|-----------|----------|-----------|-----------|-----------|
| 5.76E-06 | 1.05E-03  | 9.94E-04 | 3.80E-04  | 3.23E-04  | 4.32E-04  |
| 5.79E-06 | 7.94E-04  | 1.50E-03 | 5.77E-05  | 6.01E-04  | 4.59E-04  |
| 5.82E-06 | 1.15E-03  | 1.71E-03 | 4.52E-04  | 1.61E-04  | 4.21E-04  |
| 5.86E-06 | 6.10E-04  | 1.44E-03 | 5.20E-04  | -4.23E-05 | 4.25E-04  |
| 5.89E-06 | 6.73E-04  | 1.61E-03 | 4.77E-04  | 3.19E-04  | 6.03E-04  |
| 5.92E-06 | 7.38E-04  | 1.62E-03 | 2.49E-04  | 5.05E-06  | 2.18E-04  |
| 5.95E-06 | 7.61E-04  | 1.70E-03 | 5.86E-04  | 3.80E-05  | 6.36E-04  |
| 5.98E-06 | 3.31E-04  | 1.54E-03 | 3.98E-04  | 2.70E-04  | 1.48E-04  |
| 6.02E-06 | 3.10E-04  | 1.62E-03 | -2.67E-05 | 3.59E-04  | 3.62E-04  |
| 6.05E-06 | 3.91E-04  | 1.62E-03 | 5.21E-04  | 5.16E-04  | 8.72E-04  |
| 6.08E-06 | 5.22E-04  | 1.88E-03 | -2.93E-06 | 2.78E-04  | 4.49E-04  |
| 6.11E-06 | 3.32E-04  | 1.66E-03 | 3.13E-04  | 2.53E-04  | 4.20E-04  |
| 6.14E-06 | 3.46E-04  | 1.40E-03 | -1.62E-04 | 1.09E-04  | 6.68E-04  |
| 6.18E-06 | 2.93E-04  | 1.53E-03 | 2.23E-04  | 9.10E-04  | 5.53E-04  |
| 6.21E-06 | 8.14E-04  | 1.59E-03 | 3.59E-04  | 7.04E-04  | 4.97E-04  |
| 6.24E-06 | 1.04E-03  | 1.01E-03 | 2.59E-04  | -7.12E-05 | 6.00E-04  |
| 6.27E-06 | 3.27E-04  | 1.65E-03 | 2.70E-04  | 1.25E-04  | 3.93E-04  |
| 6.30E-06 | 6.98E-04  | 1.93E-03 | -1.69E-05 | 2.51E-04  | 4.43E-04  |
| 6.34E-06 | 4.55E-04  | 1.49E-03 | 2.47E-04  | 3.81E-04  | 4.34E-04  |
| 6.37E-06 | -1.31E-04 | 2.06E-03 | 3.44E-04  | 6.08E-04  | 4.49E-04  |
| 6.40E-06 | 5.04E-04  | 1.16E-03 | 4.88E-04  | 2.22E-04  | 6.18E-04  |
| 6.43E-06 | 6.19E-04  | 1.64E-03 | 1.37E-04  | -1.33E-05 | 4.44E-04  |
| 6.46E-06 | -1.66E-04 | 1.41E-03 | 3.71E-04  | 4.63E-04  | 4.49E-04  |
| 6.50E-06 | 6.26E-04  | 1.67E-03 | 5.23E-04  | 2.25E-04  | 2.40E-04  |
| 6.53E-06 | 1.30E-03  | 1.35E-03 | 4.49E-04  | -1.34E-04 | 6.12E-04  |
| 6.56E-06 | 6.68E-05  | 1.43E-03 | 7.76E-04  | 1.27E-04  | 9.31E-05  |
| 6.59E-06 | 3.20E-04  | 1.89E-03 | 7.51E-04  | 8.08E-04  | 3.92E-04  |
| 6.62E-06 | 1.05E-04  | 1.62E-03 | 3.29E-04  | 4.12E-04  | 6.97E-04  |
| 6.66E-06 | 8.50E-04  | 1.66E-03 | 3.19E-04  | 5.72E-04  | 5.24E-04  |
| 6.69E-06 | 9.04E-04  | 1.45E-03 | 3.80E-04  | 3.42E-04  | 3.05E-04  |
| 6.72E-06 | 1.14E-03  | 1.46E-03 | 1.05E-04  | 7.26E-04  | 5.49E-04  |
| 6.75E-06 | 7.23E-04  | 1.60E-03 | 3.46E-04  | 1.60E-04  | 4.37E-04  |
| 6.78E-06 | 9.00E-04  | 1.94E-03 | 3.66E-05  | -1.02E-04 | 6.68E-04  |
| 6.82E-06 | 7.34E-04  | 1.54E-03 | 6.16E-04  | 2.24E-04  | 5.59E-04  |
| 6.85E-06 | 7.81E-04  | 1.42E-03 | 7.59E-04  | 6.17E-04  | 4.68E-04  |
| 6.88E-06 | 7.17E-04  | 1.77E-03 | 3.61E-04  | 1.00E-04  | 5.13E-04  |
| 6.91E-06 | 1.23E-03  | 1.70E-03 | 2.52E-04  | 4.21E-04  | 9.36E-04  |
| 6.94E-06 | 7.81E-04  | 1.66E-03 | 3.20E-06  | -1.36E-04 | 5.25E-04  |
| 6.98E-06 | 4.17E-04  | 1.45E-03 | 2.45E-04  | 5.92E-04  | 6.87E-04  |
| 7.01E-06 | 1.05E-03  | 1.45E-03 | 4.30E-04  | 4.79E-04  | 5.38E-04  |
| 7.04E-06 | 5.79E-04  | 1.40E-03 | 4.43E-04  | 3.40E-04  | 2.83E-04  |
| 7.07E-06 | 7.15E-04  | 1.56E-03 | 6.32E-04  | 1.00E-04  | 6.75E-04  |
| 7.10E-06 | 8.39E-04  | 1.54E-03 | 5.03E-04  | 4.81E-04  | 5.27E-04  |
| 7.14E-06 | 1.53E-03  | 1.75E-03 | 1.52E-04  | 4.35E-04  | 5.71E-04  |
| 7.17E-06 | 8.10E-04  | 1.72E-03 | 4.56E-04  | -1.92E-04 | 2.52E-04  |
| 7.20E-06 | 4.01E-04  | 1.82E-03 | 2.58E-05  | 4.61E-04  | 4.10E-04  |
| 7.23E-06 | 1.46E-03  | 1.81E-03 | 5.28E-04  | -8.50E-05 | 2.58E-04  |
| 7.26E-06 | 1.22E-03  | 1.81E-03 | 2.93E-04  | -5.12E-05 | 4.28E-04  |
| 7.30E-06 | 4.49E-04  | 1.36E-03 | 4.64E-04  | 8.95E-05  | 2.51E-04  |
| 7.33E-06 | 1.21E-03  | 1.93E-03 | 6.26E-04  | 1.59E-04  | -3.82E-05 |
| 7.36E-06 | 6.48E-04  | 1.88E-03 | 3.21E-04  | 8.92E-05  | 6.55E-04  |
| 7.39E-06 | 6.82E-04  | 1.34E-03 | -8.46E-05 | 2.97E-04  | 5.23E-04  |
| 7.42E-06 | 8.84E-04  | 1.61E-03 | 7.61E-04  | 3.41E-04  | 5.51E-04  |
| 7.46E-06 | 8.43E-04  | 1.46E-03 | 3.94E-04  | -5.28E-05 | 5.80E-04  |

|          |           |          |           |           |           |
|----------|-----------|----------|-----------|-----------|-----------|
| 7.49E-06 | 9.78E-04  | 1.49E-03 | 6.60E-04  | 7.40E-04  | 2.48E-04  |
| 7.52E-06 | 8.03E-04  | 1.89E-03 | 5.25E-04  | 6.63E-04  | 8.48E-04  |
| 7.55E-06 | 9.72E-04  | 1.30E-03 | 5.13E-04  | -4.49E-05 | 3.13E-04  |
| 7.58E-06 | 5.52E-04  | 1.71E-03 | 2.80E-04  | 2.76E-04  | 5.98E-04  |
| 7.62E-06 | 4.36E-04  | 1.61E-03 | 5.73E-04  | 5.83E-04  | 8.72E-04  |
| 7.65E-06 | 7.45E-04  | 1.57E-03 | 5.25E-04  | 4.74E-04  | 6.53E-04  |
| 7.68E-06 | 6.16E-04  | 1.77E-03 | 1.59E-04  | 6.52E-05  | 5.19E-04  |
| 7.71E-06 | 4.16E-04  | 1.75E-03 | -4.37E-05 | 5.71E-04  | 7.54E-04  |
| 7.74E-06 | 1.24E-04  | 1.68E-03 | 4.66E-04  | 4.04E-04  | 7.07E-04  |
| 7.78E-06 | 1.79E-04  | 2.10E-03 | -3.55E-04 | 3.77E-04  | -6.81E-05 |
| 7.81E-06 | 1.03E-03  | 1.87E-03 | 2.62E-04  | 1.33E-04  | 6.87E-04  |
| 7.84E-06 | 1.31E-03  | 1.29E-03 | 7.43E-05  | 2.24E-04  | 7.79E-04  |
| 7.87E-06 | -3.79E-04 | 1.55E-03 | 1.07E-03  | 1.59E-04  | 4.78E-04  |
| 7.90E-06 | -2.00E-04 | 1.30E-03 | 2.98E-04  | 3.53E-04  | 4.36E-04  |
| 7.94E-06 | 1.17E-04  | 1.52E-03 | 2.02E-04  | 5.75E-04  | 9.23E-04  |
| 7.97E-06 | 5.74E-05  | 1.70E-03 | 1.69E-04  | 3.94E-04  | 2.91E-04  |
| 8.00E-06 | 1.03E-04  | 1.57E-03 | 1.21E-04  | 3.75E-04  | 2.17E-04  |
| 8.03E-06 | 4.34E-04  | 1.35E-03 | 3.31E-04  | 5.69E-04  | 8.01E-04  |
| 8.06E-06 | 1.24E-03  | 1.44E-03 | -3.57E-04 | 6.05E-04  | 8.56E-04  |
| 8.10E-06 | 9.08E-04  | 1.55E-03 | -3.30E-05 | 6.29E-04  | 5.05E-04  |
| 8.13E-06 | 9.88E-04  | 1.67E-03 | 9.86E-04  | 5.56E-04  | 1.14E-03  |
| 8.16E-06 | 4.33E-04  | 1.25E-03 | 1.74E-04  | 2.76E-04  | 4.26E-04  |
| 8.19E-06 | 4.59E-04  | 1.39E-03 | 8.44E-04  | 1.38E-04  | 2.16E-04  |
| 8.22E-06 | 4.24E-04  | 1.41E-03 | 5.89E-04  | 3.56E-04  | 8.22E-04  |
| 8.26E-06 | 1.26E-03  | 1.49E-03 | 2.57E-04  | 4.42E-04  | 1.71E-04  |
| 8.29E-06 | 1.19E-03  | 1.62E-03 | -4.10E-05 | 5.06E-04  | 3.73E-04  |
| 8.32E-06 | 5.73E-04  | 1.66E-03 | 6.17E-05  | -4.00E-05 | 5.33E-04  |
| 8.35E-06 | 1.30E-03  | 2.00E-03 | 6.66E-04  | 8.47E-04  | 1.66E-04  |
| 8.38E-06 | 1.21E-03  | 1.49E-03 | 7.39E-04  | 9.66E-04  | 1.38E-04  |
| 8.42E-06 | 1.38E-03  | 1.54E-03 | 2.30E-04  | 9.16E-04  | 5.54E-04  |
| 8.45E-06 | 1.71E-04  | 1.48E-03 | 5.76E-04  | 1.25E-04  | 6.59E-04  |
| 8.48E-06 | 1.03E-03  | 1.45E-03 | 6.89E-04  | 4.14E-04  | 6.02E-04  |
| 8.51E-06 | 1.34E-03  | 9.46E-04 | 3.91E-04  | 2.93E-04  | 4.74E-04  |
| 8.54E-06 | 7.65E-04  | 1.74E-03 | 1.82E-04  | 5.21E-04  | 4.35E-04  |
| 8.58E-06 | 6.72E-04  | 9.90E-04 | 7.91E-04  | 4.64E-04  | 2.66E-04  |
| 8.61E-06 | 7.26E-04  | 1.29E-03 | 2.91E-04  | 6.60E-06  | 3.44E-04  |
| 8.64E-06 | 1.24E-03  | 1.20E-03 | -2.48E-04 | 3.70E-04  | 2.63E-04  |
| 8.67E-06 | 2.39E-04  | 1.66E-03 | 6.79E-04  | 1.52E-05  | 8.78E-04  |
| 8.70E-06 | 1.56E-04  | 1.59E-03 | 5.19E-05  | 6.24E-04  | 6.94E-04  |
| 8.74E-06 | 7.95E-04  | 1.37E-03 | 5.32E-04  | 2.74E-04  | 3.94E-04  |
| 8.77E-06 | 6.24E-04  | 1.55E-03 | 1.44E-04  | 6.47E-04  | 9.82E-04  |
| 8.80E-06 | 1.92E-04  | 1.46E-03 | 3.79E-05  | 2.13E-04  | 3.73E-04  |
| 8.83E-06 | 1.05E-03  | 1.82E-03 | 1.14E-03  | -1.52E-04 | 1.84E-04  |
| 8.86E-06 | 5.28E-04  | 1.48E-03 | 1.05E-03  | 1.16E-04  | -4.82E-05 |
| 8.90E-06 | 4.57E-04  | 1.30E-03 | 1.30E-04  | 9.86E-04  | 2.41E-04  |
| 8.93E-06 | -1.27E-04 | 1.11E-03 | 1.40E-04  | 1.91E-05  | 1.27E-03  |
| 8.96E-06 | -2.28E-04 | 1.58E-03 | 1.02E-03  | 4.42E-04  | 8.47E-04  |
| 8.99E-06 | 6.26E-04  | 1.44E-03 | 8.15E-04  | 2.50E-04  | 9.76E-04  |
| 9.02E-06 | 7.18E-04  | 1.80E-03 | 6.30E-04  | -1.54E-05 | 4.71E-04  |
| 9.06E-06 | 1.87E-04  | 1.51E-03 | 7.36E-04  | 2.44E-04  | 4.34E-04  |
| 9.09E-06 | 9.62E-04  | 9.17E-04 | 5.79E-04  | 5.44E-04  | 6.86E-04  |
| 9.12E-06 | 8.10E-04  | 1.52E-03 | 5.80E-04  | -2.46E-04 | 1.38E-04  |
| 9.15E-06 | 4.11E-04  | 1.44E-03 | 5.86E-04  | -9.77E-05 | 2.00E-04  |
| 9.18E-06 | 3.24E-04  | 1.44E-03 | -2.37E-04 | 5.79E-04  | 1.12E-03  |

|          |           |          |           |           |           |
|----------|-----------|----------|-----------|-----------|-----------|
| 9.22E-06 | 9.27E-04  | 1.50E-03 | 3.76E-04  | 3.77E-04  | 4.50E-04  |
| 9.25E-06 | 1.10E-03  | 1.22E-03 | 5.88E-04  | 5.63E-04  | 2.40E-04  |
| 9.28E-06 | 6.17E-04  | 1.30E-03 | 7.45E-04  | 3.48E-04  | 6.38E-04  |
| 9.31E-06 | 5.76E-04  | 1.23E-03 | 2.09E-04  | 2.39E-04  | 2.02E-04  |
| 9.34E-06 | 7.20E-05  | 1.46E-03 | 8.17E-04  | -3.44E-05 | 7.36E-04  |
| 9.38E-06 | 4.49E-04  | 1.33E-03 | 6.42E-04  | 5.76E-05  | 1.17E-03  |
| 9.41E-06 | 7.38E-04  | 1.36E-03 | 4.33E-04  | 5.65E-04  | 3.01E-04  |
| 9.44E-06 | 6.16E-04  | 1.52E-03 | 6.28E-05  | 1.84E-04  | 2.44E-04  |
| 9.47E-06 | 1.12E-03  | 1.46E-03 | 1.38E-03  | -1.72E-04 | 8.06E-05  |
| 9.50E-06 | 9.47E-04  | 1.68E-03 | 1.32E-03  | -3.63E-04 | 3.75E-04  |
| 9.54E-06 | 4.45E-04  | 1.73E-03 | 4.34E-04  | 2.81E-04  | 2.34E-04  |
| 9.57E-06 | -9.46E-05 | 1.23E-03 | 1.17E-04  | 8.74E-05  | 4.59E-05  |
| 9.60E-06 | 6.93E-04  | 1.83E-03 | 4.06E-04  | 6.31E-04  | 1.49E-04  |
| 9.63E-06 | 8.26E-04  | 9.90E-04 | 6.84E-04  | -4.65E-04 | 7.28E-04  |
| 9.66E-06 | 1.25E-03  | 1.41E-03 | 8.85E-04  | 1.01E-04  | 2.67E-04  |
| 9.70E-06 | 1.16E-03  | 1.44E-03 | 6.89E-04  | 3.26E-04  | 3.82E-04  |
| 9.73E-06 | 3.75E-04  | 1.21E-03 | -2.51E-04 | 1.99E-04  | 3.32E-04  |
| 9.76E-06 | 1.09E-03  | 1.74E-03 | 5.91E-04  | 3.66E-04  | 1.79E-03  |
| 9.79E-06 | 5.41E-04  | 1.52E-03 | 8.23E-04  | 8.67E-05  | 9.82E-04  |
| 9.82E-06 | 4.08E-04  | 1.86E-03 | 9.36E-04  | -4.64E-05 | 3.77E-05  |
| 9.86E-06 | 1.09E-03  | 1.74E-03 | 3.85E-04  | -1.03E-05 | 6.19E-04  |
| 9.89E-06 | 1.61E-04  | 1.34E-03 | 9.18E-05  | 8.28E-04  | 6.84E-04  |
| 9.92E-06 | 1.24E-03  | 1.21E-03 | -3.87E-04 | 6.44E-05  | 3.92E-05  |
| 9.95E-06 | 4.39E-04  | 1.98E-03 | 5.01E-04  | 2.10E-04  | 1.24E-03  |
| 9.98E-06 | 4.79E-04  | 4.50E-04 | 6.50E-04  | 5.97E-04  | 2.73E-04  |
| 1.00E-05 | 7.41E-04  | 9.25E-04 | 2.16E-04  | -4.35E-04 | 8.57E-05  |
| 1.01E-05 | 1.06E-03  | 6.14E-04 | 5.00E-04  | 1.73E-04  | 7.38E-04  |
| 1.01E-05 | 4.50E-04  | 8.24E-04 | 2.01E-04  | 5.34E-04  | 1.04E-03  |
| 1.01E-05 | 5.14E-04  | 1.70E-03 | 3.83E-04  | 6.08E-04  | 3.21E-04  |
| 1.01E-05 | 5.06E-04  | 8.22E-04 | 4.61E-05  | 8.15E-04  | -2.93E-04 |
| 1.02E-05 | 5.56E-04  | 1.45E-03 | 2.02E-04  | -9.77E-05 | -1.05E-04 |
| 1.02E-05 | 3.44E-04  | 1.30E-03 | 2.76E-04  | 2.47E-04  | 8.32E-04  |
| 1.02E-05 | 6.51E-04  | 9.79E-04 | 3.57E-04  | -1.16E-04 | -1.62E-04 |
| 1.03E-05 | 4.46E-04  | 1.15E-03 | 4.43E-04  | 6.51E-04  | 7.86E-04  |
| 1.03E-05 | 6.33E-04  | 1.47E-03 | 1.25E-03  | 1.19E-03  | 6.77E-04  |
| 1.03E-05 | 7.65E-04  | 1.55E-03 | 4.82E-04  | 3.03E-04  | 4.78E-04  |
| 1.04E-05 | 5.96E-04  | 9.60E-04 | 9.75E-05  | 8.25E-04  | 2.59E-04  |
| 1.04E-05 | 6.13E-04  | 1.57E-03 | 1.14E-03  | 5.45E-04  | 6.24E-04  |
| 1.04E-05 | 1.89E-04  | 1.37E-03 | -1.16E-04 | 9.38E-06  | 1.11E-04  |
| 1.05E-05 | 8.23E-04  | 1.71E-03 | -2.54E-04 | 9.41E-04  | -6.07E-05 |
| 1.05E-05 | 9.80E-04  | 1.29E-03 | 6.78E-04  | -2.42E-06 | 9.55E-04  |
| 1.05E-05 | 5.24E-04  | 9.37E-04 | 3.02E-04  | 6.10E-04  | 8.16E-04  |
| 1.06E-05 | 6.70E-04  | 1.67E-03 | 2.60E-05  | 8.91E-04  | -2.34E-04 |
| 1.06E-05 | 3.83E-04  | 6.54E-04 | 5.82E-04  | 3.45E-04  | 4.10E-04  |
| 1.06E-05 | 5.83E-04  | 1.12E-03 | 2.46E-04  | -1.39E-04 | -3.21E-04 |
| 1.07E-05 | 3.12E-04  | 1.24E-03 | 4.76E-04  | -5.07E-04 | 9.35E-04  |
| 1.07E-05 | 7.09E-04  | 2.29E-03 | 9.72E-04  | 2.70E-04  | 5.79E-05  |
| 1.07E-05 | 6.47E-04  | 2.17E-03 | 2.63E-04  | 1.89E-04  | 6.14E-04  |
| 1.08E-05 | 5.61E-04  | 1.21E-03 | 3.62E-04  | -8.26E-05 | 1.50E-04  |
| 1.08E-05 | 4.30E-04  | 1.21E-03 | 4.35E-04  | 2.42E-06  | 4.70E-04  |
| 1.08E-05 | 4.68E-04  | 1.07E-03 | 3.16E-04  | 6.68E-04  | 8.78E-04  |
| 1.09E-05 | 5.76E-04  | 1.50E-03 | 2.66E-04  | 4.37E-04  | 6.42E-04  |
| 1.09E-05 | 2.89E-04  | 1.69E-03 | 7.55E-05  | 2.44E-04  | 1.12E-03  |
| 1.09E-05 | 4.89E-04  | 6.08E-04 | 1.64E-04  | -2.23E-04 | 2.01E-04  |

|          |          |          |           |           |           |
|----------|----------|----------|-----------|-----------|-----------|
| 1.09E-05 | 4.00E-04 | 5.81E-04 | 7.79E-04  | 5.62E-05  | 3.69E-04  |
| 1.10E-05 | 5.07E-04 | 9.09E-04 | 6.00E-04  | 1.49E-04  | 8.06E-04  |
| 1.10E-05 | 4.55E-04 | 8.19E-04 | 4.52E-04  | 6.84E-04  | -1.37E-04 |
| 1.10E-05 | 5.15E-04 | 1.70E-03 | 2.77E-04  | 2.44E-04  | 4.86E-04  |
| 1.11E-05 | 1.48E-04 | 6.48E-04 | 2.33E-04  | -7.74E-05 | 3.63E-04  |
| 1.11E-05 | 3.95E-04 | 1.09E-03 | 5.98E-04  | 7.40E-05  | 4.65E-04  |
| 1.11E-05 | 6.01E-04 | 1.20E-03 | 5.55E-04  | 3.32E-04  | 1.28E-04  |
| 1.12E-05 | 4.04E-04 | 6.04E-04 | 4.61E-04  | 2.17E-04  | 2.86E-04  |
| 1.12E-05 | 9.56E-04 | 1.11E-03 | 6.09E-04  | 8.43E-04  | 2.02E-04  |
| 1.12E-05 | 4.60E-04 | 1.21E-03 | 5.27E-04  | -5.28E-05 | 2.63E-04  |
| 1.13E-05 | 3.93E-04 | 1.37E-03 | -3.68E-04 | 1.37E-04  | 9.16E-04  |
| 1.13E-05 | 3.80E-04 | 1.54E-03 | 9.85E-04  | 5.09E-04  | 5.17E-04  |
| 1.13E-05 | 3.52E-04 | 9.05E-04 | 4.25E-04  | 4.99E-04  | 3.39E-04  |
| 1.14E-05 | 2.94E-04 | 1.70E-03 | 1.90E-04  | 1.50E-04  | 2.15E-04  |
| 1.14E-05 | 7.10E-04 | 1.36E-03 | 3.39E-04  | 3.20E-04  | 6.89E-04  |
| 1.14E-05 | 5.84E-04 | 9.02E-04 | 9.24E-04  | 7.47E-04  | 6.08E-04  |
| 1.15E-05 | 4.41E-04 | 1.13E-03 | 1.17E-03  | -1.68E-04 | 3.65E-04  |
| 1.15E-05 | 3.55E-04 | 1.31E-03 | 8.04E-04  | -1.63E-06 | 8.51E-04  |
| 1.15E-05 | 5.75E-04 | 1.34E-03 | 1.71E-04  | 4.54E-05  | 6.65E-04  |
| 1.16E-05 | 7.96E-04 | 8.50E-04 | 3.18E-04  | 1.73E-04  | 2.98E-04  |
| 1.16E-05 | 5.70E-04 | 8.18E-04 | 2.98E-04  | 2.71E-04  | 9.66E-04  |
| 1.16E-05 | 5.89E-04 | 1.61E-03 | 7.66E-04  | -3.08E-04 | 7.14E-04  |
| 1.17E-05 | 7.87E-04 | 8.94E-04 | 4.63E-04  | -2.27E-04 | 1.36E-03  |
| 1.17E-05 | 6.38E-04 | 5.72E-04 | 1.77E-04  | -1.77E-04 | 3.27E-04  |
| 1.17E-05 | 3.90E-04 | 1.30E-03 | 7.48E-04  | 2.11E-04  | 1.09E-03  |
| 1.17E-05 | 3.86E-04 | 1.51E-03 | 3.02E-04  | -1.53E-04 | 6.99E-04  |
| 1.18E-05 | 5.01E-04 | 1.85E-03 | 5.29E-04  | -5.18E-05 | 9.93E-04  |
| 1.18E-05 | 4.48E-04 | 1.01E-03 | 2.17E-04  | -4.63E-06 | 1.16E-03  |
| 1.18E-05 | 6.02E-04 | 7.01E-04 | 1.61E-04  | -1.35E-04 | 1.08E-03  |
| 1.19E-05 | 1.60E-04 | 1.41E-03 | 6.48E-05  | 4.49E-05  | 9.40E-04  |
| 1.19E-05 | 5.42E-04 | 9.33E-04 | 5.03E-04  | 1.43E-04  | 1.25E-04  |
| 1.19E-05 | 4.16E-04 | 1.74E-03 | 4.08E-04  | 7.94E-05  | -3.25E-05 |
| 1.20E-05 | 6.16E-04 | 6.31E-04 | 3.89E-04  | -2.25E-04 | 5.39E-04  |
| 1.20E-05 | 4.91E-04 | 8.29E-04 | -8.22E-05 | -7.46E-05 | 1.95E-04  |
| 1.20E-05 | 4.17E-04 | 1.35E-03 | 9.08E-05  | 2.52E-04  | 9.21E-04  |
| 1.21E-05 | 5.06E-04 | 1.29E-03 | 8.04E-04  | -1.39E-04 | 4.92E-04  |
| 1.21E-05 | 4.96E-04 | 1.82E-03 | 6.32E-04  | 1.37E-04  | 8.11E-04  |
| 1.21E-05 | 4.73E-04 | 6.42E-04 | 1.03E-04  | -1.54E-04 | 2.32E-04  |
| 1.22E-05 | 9.27E-05 | 1.88E-03 | 2.44E-04  | 1.29E-04  | 1.22E-03  |
| 1.22E-05 | 7.03E-04 | 1.21E-03 | 3.15E-04  | 4.14E-04  | 1.30E-04  |
| 1.22E-05 | 2.97E-04 | 4.38E-04 | 5.99E-04  | 4.11E-04  | 5.01E-04  |
| 1.23E-05 | 3.62E-04 | 1.39E-03 | 2.82E-05  | -8.88E-05 | 7.92E-04  |
| 1.23E-05 | 4.95E-04 | 1.32E-03 | 2.71E-04  | -1.13E-04 | 1.40E-03  |
| 1.23E-05 | 1.59E-04 | 1.11E-03 | 4.92E-04  | 2.19E-04  | 7.22E-04  |
| 1.24E-05 | 3.54E-04 | 1.65E-03 | 7.03E-04  | 8.02E-06  | 2.97E-04  |
| 1.24E-05 | 2.75E-04 | 4.52E-04 | 2.33E-04  | 3.18E-04  | 3.64E-04  |
| 1.24E-05 | 4.83E-04 | 1.04E-03 | 2.71E-04  | 3.53E-04  | -1.81E-04 |
| 1.25E-05 | 4.02E-04 | 9.42E-04 | -3.25E-06 | -6.29E-05 | 6.31E-04  |
| 1.25E-05 | 3.66E-04 | 1.07E-03 | 2.07E-04  | -1.17E-04 | 9.50E-04  |
| 1.25E-05 | 3.23E-04 | 5.51E-04 | 9.91E-05  | 2.98E-04  | 8.90E-04  |
| 1.25E-05 | 3.81E-04 | 1.93E-03 | 6.69E-04  | -1.19E-04 | 8.69E-04  |
| 1.26E-05 | 4.39E-04 | 1.47E-03 | 1.80E-04  | 4.67E-04  | 7.97E-04  |
| 1.26E-05 | 5.61E-04 | 1.35E-03 | 3.12E-04  | 7.10E-05  | 6.41E-04  |
| 1.26E-05 | 1.63E-04 | 1.06E-03 | 4.74E-04  | -2.20E-04 | 3.02E-04  |

|          |           |          |           |           |           |
|----------|-----------|----------|-----------|-----------|-----------|
| 1.27E-05 | 3.63E-04  | 9.98E-04 | -3.27E-04 | -1.91E-04 | -2.26E-05 |
| 1.27E-05 | 3.98E-04  | 1.18E-03 | 3.35E-04  | 9.14E-05  | 5.11E-04  |
| 1.27E-05 | 5.63E-04  | 1.10E-03 | 5.60E-04  | 1.31E-05  | 5.13E-04  |
| 1.28E-05 | 1.21E-04  | 1.08E-03 | 2.56E-04  | 5.15E-04  | 8.24E-04  |
| 1.28E-05 | 4.40E-04  | 9.59E-04 | 5.42E-04  | 3.52E-04  | 1.24E-04  |
| 1.28E-05 | 5.91E-04  | 1.07E-03 | 5.30E-04  | 1.86E-04  | 6.18E-04  |
| 1.29E-05 | 6.28E-04  | 1.12E-03 | 3.22E-04  | -2.64E-05 | 1.10E-03  |
| 1.29E-05 | 5.40E-04  | 8.11E-04 | 4.59E-04  | 5.53E-04  | 9.69E-05  |
| 1.29E-05 | 5.14E-04  | 1.12E-03 | 1.10E-04  | -1.09E-04 | 3.99E-04  |
| 1.30E-05 | 3.97E-04  | 6.90E-04 | 4.23E-04  | -2.66E-04 | 6.25E-04  |
| 1.30E-05 | 5.98E-04  | 1.76E-03 | 2.34E-04  | 2.16E-04  | 1.17E-03  |
| 1.30E-05 | 2.16E-04  | 1.36E-03 | 5.17E-04  | -3.61E-04 | 7.16E-04  |
| 1.31E-05 | 6.03E-04  | 7.75E-04 | 2.56E-04  | 1.02E-04  | 7.24E-04  |
| 1.31E-05 | 4.29E-04  | 1.87E-03 | 3.06E-04  | -1.16E-04 | 5.10E-04  |
| 1.31E-05 | 8.03E-04  | 1.17E-03 | 5.46E-04  | 4.13E-05  | 3.36E-04  |
| 1.32E-05 | 4.64E-04  | 7.42E-04 | 5.97E-04  | -1.87E-04 | 3.64E-04  |
| 1.32E-05 | 7.10E-04  | 1.29E-03 | 1.96E-04  | 1.37E-04  | 5.50E-04  |
| 1.32E-05 | 5.29E-04  | 1.39E-03 | 2.30E-04  | 3.22E-05  | 1.10E-03  |
| 1.33E-05 | 4.93E-04  | 1.53E-03 | -2.03E-04 | -9.70E-05 | 8.03E-04  |
| 1.33E-05 | 8.86E-05  | 7.46E-04 | 1.16E-03  | -3.26E-04 | 1.14E-03  |
| 1.33E-05 | 4.80E-04  | 1.29E-03 | 9.00E-05  | 1.04E-04  | 8.65E-04  |
| 1.33E-05 | 1.58E-04  | 1.18E-03 | 3.38E-04  | -9.47E-05 | 6.65E-04  |
| 1.34E-05 | 3.87E-04  | 1.03E-03 | 1.04E-04  | -1.48E-04 | 7.99E-04  |
| 1.34E-05 | 5.24E-04  | 1.21E-03 | 6.45E-04  | -1.10E-04 | 6.40E-04  |
| 1.34E-05 | 3.73E-04  | 5.51E-04 | 2.76E-04  | -3.00E-04 | 3.48E-04  |
| 1.35E-05 | 3.95E-04  | 9.70E-04 | 3.18E-04  | 6.97E-06  | 1.04E-03  |
| 1.35E-05 | 2.79E-04  | 9.42E-04 | 5.18E-04  | 1.37E-04  | 1.15E-03  |
| 1.35E-05 | 2.56E-04  | 1.33E-03 | 2.25E-04  | -4.22E-04 | 1.15E-03  |
| 1.36E-05 | 4.18E-04  | 7.35E-04 | 3.81E-04  | -2.33E-04 | 1.36E-04  |
| 1.36E-05 | 2.74E-04  | 9.52E-04 | 1.57E-04  | 2.83E-04  | 3.93E-04  |
| 1.36E-05 | -1.76E-05 | 9.83E-04 | 5.25E-05  | -2.11E-04 | 4.06E-04  |
| 1.37E-05 | 2.40E-04  | 1.23E-03 | 2.97E-04  | -1.43E-04 | 1.11E-03  |
| 1.37E-05 | 2.82E-04  | 1.70E-03 | 7.70E-05  | -4.42E-05 | 4.46E-04  |
| 1.37E-05 | 5.80E-04  | 1.01E-03 | 1.01E-04  | -2.10E-04 | 5.70E-04  |
| 1.38E-05 | 7.45E-04  | 1.38E-03 | 2.37E-04  | -1.60E-04 | 6.99E-04  |
| 1.38E-05 | 7.33E-04  | 1.62E-03 | 3.66E-05  | -9.96E-05 | 5.23E-04  |
| 1.38E-05 | -1.10E-04 | 1.34E-03 | 6.06E-04  | 1.15E-04  | -3.93E-05 |
| 1.39E-05 | 3.77E-04  | 8.38E-04 | 2.56E-04  | 1.41E-04  | 8.32E-04  |
| 1.39E-05 | 4.69E-04  | 1.22E-03 | 1.19E-04  | -3.01E-04 | 4.68E-04  |
| 1.39E-05 | 1.07E-04  | 1.21E-03 | 2.05E-04  | 1.22E-04  | 6.78E-04  |
| 1.40E-05 | 4.18E-04  | 1.15E-03 | 1.94E-04  | -3.51E-04 | 4.21E-04  |
| 1.40E-05 | 6.25E-04  | 1.20E-03 | 1.40E-04  | -1.18E-04 | 6.35E-04  |
| 1.40E-05 | 5.43E-04  | 9.79E-04 | 1.89E-04  | 8.25E-05  | 4.85E-04  |
| 1.41E-05 | 5.12E-04  | 8.34E-04 | -1.40E-04 | 2.00E-04  | 2.38E-05  |
| 1.41E-05 | 2.03E-04  | 9.52E-04 | 3.50E-05  | -2.31E-04 | 1.63E-04  |
| 1.41E-05 | 3.27E-04  | 1.36E-03 | 2.39E-04  | 3.57E-04  | 7.74E-04  |
| 1.41E-05 | 5.10E-05  | 1.27E-03 | 1.25E-04  | -1.37E-04 | 6.31E-04  |
| 1.42E-05 | 2.36E-04  | 7.37E-04 | 4.69E-05  | 3.73E-04  | 1.05E-03  |
| 1.42E-05 | 3.23E-04  | 1.19E-03 | 2.45E-04  | -1.63E-04 | 8.60E-04  |
| 1.42E-05 | 2.75E-04  | 1.10E-03 | 2.94E-04  | 4.30E-05  | 6.39E-04  |
| 1.43E-05 | 1.45E-04  | 9.28E-04 | 2.66E-04  | -2.44E-05 | 4.08E-04  |
| 1.43E-05 | -4.74E-05 | 1.10E-03 | 1.09E-04  | -2.82E-04 | 7.93E-04  |
| 1.43E-05 | 1.55E-04  | 1.02E-03 | 3.25E-05  | -5.30E-05 | -1.35E-04 |
| 1.44E-05 | 5.53E-04  | 8.40E-04 | -1.63E-05 | 6.99E-05  | 8.09E-04  |

|          |           |          |           |           |           |
|----------|-----------|----------|-----------|-----------|-----------|
| 1.44E-05 | 1.38E-04  | 1.10E-03 | 2.69E-04  | -1.60E-04 | 5.58E-04  |
| 1.44E-05 | 5.49E-04  | 8.96E-04 | 1.78E-04  | -1.21E-04 | 6.02E-04  |
| 1.45E-05 | 4.26E-04  | 1.31E-03 | 4.23E-04  | -7.99E-05 | 6.11E-04  |
| 1.45E-05 | 3.10E-04  | 1.04E-03 | -9.14E-06 | -2.86E-04 | 4.40E-04  |
| 1.45E-05 | 3.83E-04  | 1.07E-03 | 6.54E-04  | -4.52E-04 | 3.82E-04  |
| 1.46E-05 | 4.41E-04  | 1.21E-03 | 3.03E-04  | 1.03E-04  | 5.30E-04  |
| 1.46E-05 | 3.32E-04  | 1.35E-03 | 3.63E-04  | 6.34E-06  | -1.43E-04 |
| 1.46E-05 | 3.66E-04  | 1.40E-03 | 6.49E-04  | -2.29E-05 | 4.48E-04  |
| 1.47E-05 | 3.70E-04  | 1.63E-03 | 7.44E-04  | -5.24E-05 | 5.76E-04  |
| 1.47E-05 | 3.06E-05  | 8.43E-04 | 7.12E-04  | -1.98E-04 | 6.30E-04  |
| 1.47E-05 | 5.98E-04  | 1.01E-03 | 5.37E-04  | 2.98E-04  | 4.30E-04  |
| 1.48E-05 | 5.54E-04  | 1.21E-03 | 1.95E-04  | -9.82E-05 | 5.35E-04  |
| 1.48E-05 | 1.51E-04  | 1.11E-03 | 1.64E-04  | 1.40E-04  | 4.86E-04  |
| 1.48E-05 | -4.32E-05 | 9.43E-04 | 1.49E-04  | 2.32E-04  | 9.56E-04  |
| 1.49E-05 | 3.07E-04  | 8.60E-04 | 1.67E-05  | -4.85E-04 | 7.72E-04  |
| 1.49E-05 | 7.91E-04  | 1.04E-03 | 6.86E-05  | -9.47E-05 | 4.57E-04  |
| 1.49E-05 | 3.24E-04  | 1.17E-03 | 7.67E-04  | -1.16E-04 | 5.35E-04  |
| 1.49E-05 | 4.96E-04  | 1.11E-03 | -1.79E-04 | -1.40E-04 | 7.05E-04  |
| 1.50E-05 | 1.88E-04  | 8.14E-04 | 9.39E-05  | -2.18E-04 | 3.01E-04  |

**Table SI.16:** Primary kinetic data for the reaction of 1,1,3,3-tetramethylurea (**S16**) with CumO• generated by 355 nm LFP in MeCN (**Figure SI.16**).

| t / s   | $\Delta A$ 1,1,3,3-tetramethylurea ( <b>S16</b> ) |                |               |               |               |
|---------|---------------------------------------------------|----------------|---------------|---------------|---------------|
|         | <b>0.0332M</b>                                    | <b>0.0988M</b> | <b>0.163M</b> | <b>0.227M</b> | <b>0.290M</b> |
| -1E-06  | 0.00028                                           | -0.0005        | -4E-05        | 2.8E-05       | -5E-06        |
| -1E-06  | 0.00077                                           | 0.00024        | -0.0002       | -0.0001       | 0.00016       |
| -9E-07  | 0.00101                                           | 0.00026        | -0.0005       | -0.0007       | 0.00124       |
| -9E-07  | 0.00089                                           | -1E-05         | -0.0006       | -0.0007       | -4E-05        |
| -9E-07  | 0.00153                                           | 0.00044        | -0.0005       | -0.0004       | 0.00109       |
| -8E-07  | 0.00045                                           | 0.00053        | -0.0001       | 0.00037       | 0.00087       |
| -8E-07  | 0.00011                                           | -2E-05         | -9E-05        | 0.00064       | 0.00084       |
| -8E-07  | 0.00037                                           | -0.0001        | 0.00038       | -0.0012       | 9.2E-05       |
| -7E-07  | 0.00094                                           | 0.00066        | -0.0001       | -0.0009       | 0.00083       |
| -7E-07  | 0.00096                                           | 0.00028        | -0.0003       | -0.0002       | 0.00034       |
| -7E-07  | 0.00036                                           | -0.0002        | -0.0009       | 8.2E-05       | 0.00058       |
| -6E-07  | 0.00077                                           | 0.00036        | -0.0008       | -0.0006       | 0.00103       |
| -6E-07  | 0.00094                                           | -0.0004        | -0.0007       | -0.0006       | 0.00029       |
| -6E-07  | 0.00054                                           | -7E-05         | -0.0005       | -0.0003       | 0.00026       |
| -5E-07  | 0.00068                                           | -0.0005        | -0.0001       | 0.00024       | 0.00028       |
| -5E-07  | 0.00074                                           | 9.3E-05        | -0.0003       | 0.0003        | 0.00103       |
| -5E-07  | 0.00067                                           | -7E-05         | 3.8E-05       | -0.0006       | 0.00115       |
| -4E-07  | 0.00057                                           | -0.0002        | 0.00012       | -8E-05        | 0.00105       |
| -4E-07  | 0.00055                                           | 4.6E-05        | 0.00035       | -0.0007       | 0.00135       |
| -4E-07  | 0.00091                                           | 0.00025        | 0.00029       | -4E-05        | 0.00031       |
| -4E-07  | 0.00069                                           | -0.0002        | -1E-05        | 0.00088       | 0.00014       |
| -3E-07  | 0.0008                                            | -6E-05         | -0.0008       | -0.0003       | 0.00053       |
| -3E-07  | 0.00119                                           | 0.00016        | -5E-05        | -0.0002       | 0.00051       |
| -3E-07  | 0.00144                                           | 0.00089        | -0.0009       | -0.001        | 0.00047       |
| -2E-07  | 0.00141                                           | -0.0005        | -0.0002       | -0.0005       | 0.00053       |
| -2E-07  | 0.00102                                           | 0.00019        | 0.00013       | -0.0006       | 0.00072       |
| -2E-07  | 0.00141                                           | -0.0002        | 0.00026       | -0.0004       | 0.00076       |
| -1E-07  | 0.00057                                           | 0.00041        | 8E-05         | 0.00046       | 0.00099       |
| -1E-07  | 0.00063                                           | -0.0002        | -9E-06        | 0.00031       | 0.00094       |
| -6E-08  | 7.9E-05                                           | -0.0007        | 3.4E-05       | -0.0004       | 0.00021       |
| -3E-08  | 0.00012                                           | -0.0004        | -0.0003       | 0.00022       | 0.0011        |
| -1E-10  | 0.00036                                           | -0.0009        | -0.0013       | -0.0009       | -0.0006       |
| 3.2E-08 | 0.00609                                           | -0.0023        | -0.0088       | -0.0132       | -0.0151       |
| 6.4E-08 | 0.01641                                           | 0.01424        | 0.01426       | 0.01219       | 0.01352       |
| 9.6E-08 | 0.01666                                           | 0.0145         | 0.0146        | 0.01295       | 0.01324       |
| 1.3E-07 | 0.01627                                           | 0.0142         | 0.0131        | 0.01251       | 0.01359       |
| 1.6E-07 | 0.01579                                           | 0.01359        | 0.01258       | 0.01197       | 0.01281       |
| 1.9E-07 | 0.0158                                            | 0.01286        | 0.0124        | 0.01062       | 0.01198       |
| 2.2E-07 | 0.01459                                           | 0.01262        | 0.01169       | 0.00993       | 0.01136       |
| 2.6E-07 | 0.0139                                            | 0.01144        | 0.01068       | 0.00907       | 0.0102        |
| 2.9E-07 | 0.01377                                           | 0.01123        | 0.01041       | 0.00855       | 0.00953       |
| 3.2E-07 | 0.01388                                           | 0.01106        | 0.01004       | 0.00777       | 0.00929       |
| 3.5E-07 | 0.01307                                           | 0.00976        | 0.00958       | 0.00764       | 0.00802       |
| 3.8E-07 | 0.01229                                           | 0.00961        | 0.0094        | 0.00775       | 0.00756       |
| 4.2E-07 | 0.0119                                            | 0.00957        | 0.00819       | 0.00661       | 0.00648       |
| 4.5E-07 | 0.01219                                           | 0.00899        | 0.00757       | 0.00656       | 0.00654       |
| 4.8E-07 | 0.01168                                           | 0.00915        | 0.00711       | 0.00567       | 0.00703       |
| 5.1E-07 | 0.01161                                           | 0.00884        | 0.00728       | 0.00626       | 0.00566       |
| 5.4E-07 | 0.01117                                           | 0.0078         | 0.00608       | 0.00481       | 0.00529       |



|         |         |         |         |         |         |
|---------|---------|---------|---------|---------|---------|
| 5.8E-07 | 0.01043 | 0.00739 | 0.00634 | 0.00434 | 0.00557 |
| 6.1E-07 | 0.01093 | 0.00797 | 0.00554 | 0.00421 | 0.00466 |
| 6.4E-07 | 0.01011 | 0.00735 | 0.0065  | 0.00329 | 0.00443 |
| 6.7E-07 | 0.00995 | 0.00668 | 0.0047  | 0.00342 | 0.00394 |
| 7E-07   | 0.01068 | 0.00695 | 0.00441 | 0.00269 | 0.00386 |
| 7.4E-07 | 0.0093  | 0.00609 | 0.00448 | 0.0038  | 0.00357 |
| 7.7E-07 | 0.00921 | 0.00582 | 0.00437 | 0.00287 | 0.00266 |
| 8E-07   | 0.00882 | 0.00516 | 0.00339 | 0.00232 | 0.00349 |
| 8.3E-07 | 0.00844 | 0.00573 | 0.00375 | 0.00308 | 0.00293 |
| 8.6E-07 | 0.00858 | 0.00528 | 0.00326 | 0.00193 | 0.00267 |
| 9E-07   | 0.00861 | 0.00539 | 0.00347 | 0.00228 | 0.00233 |
| 9.3E-07 | 0.00837 | 0.00433 | 0.00276 | 0.00227 | 0.00282 |
| 9.6E-07 | 0.00862 | 0.00503 | 0.00325 | 0.00129 | 0.0028  |
| 9.9E-07 | 0.00772 | 0.00479 | 0.00227 | 0.00208 | 0.00176 |
| 1E-06   | 0.00715 | 0.00437 | 0.00273 | 0.00223 | 0.00205 |
| 1.1E-06 | 0.00737 | 0.00428 | 0.00193 | 0.00127 | 0.00232 |
| 1.1E-06 | 0.00689 | 0.00351 | 0.002   | 0.00051 | 0.00179 |
| 1.1E-06 | 0.00646 | 0.00339 | 0.00236 | 0.00146 | 0.00211 |
| 1.2E-06 | 0.00711 | 0.00326 | 0.00129 | 0.00123 | 0.00184 |
| 1.2E-06 | 0.00665 | 0.00319 | 0.00211 | 0.00111 | 0.00145 |
| 1.2E-06 | 0.00713 | 0.00329 | 0.00162 | 0.00128 | 0.00167 |
| 1.2E-06 | 0.00574 | 0.00302 | 0.00148 | 0.00105 | 0.00196 |
| 1.3E-06 | 0.0061  | 0.00336 | 0.00172 | 0.00163 | 0.00148 |
| 1.3E-06 | 0.00563 | 0.00267 | 0.00112 | 0.00108 | 0.00135 |
| 1.3E-06 | 0.00544 | 0.00297 | 0.00139 | 0.00089 | 0.00146 |
| 1.4E-06 | 0.00547 | 0.0023  | 0.00112 | 0.00049 | 0.00114 |
| 1.4E-06 | 0.00512 | 0.00271 | 0.0013  | 0.00119 | 0.00177 |
| 1.4E-06 | 0.0053  | 0.0027  | 0.00085 | 0.00147 | 0.00166 |
| 1.5E-06 | 0.00534 | 0.00193 | 0.00126 | -0.0001 | 0.00143 |
| 1.5E-06 | 0.00516 | 0.00244 | 0.00082 | 0.00018 | 0.00191 |
| 1.5E-06 | 0.0048  | 0.0028  | 0.00084 | -0.0003 | 0.00082 |
| 1.6E-06 | 0.00531 | 0.00287 | 0.00089 | 0.00061 | 0.00112 |
| 1.6E-06 | 0.00524 | 0.00176 | 0.00099 | 0.00127 | 0.00173 |
| 1.6E-06 | 0.00437 | 0.00155 | 0.00048 | 0.00015 | 0.001   |
| 1.7E-06 | 0.00418 | 0.00167 | 0.00041 | 0.00029 | 0.00148 |
| 1.7E-06 | 0.00458 | 0.00165 | 0.00054 | 0.00019 | 0.00094 |
| 1.7E-06 | 0.00501 | 0.00254 | 0.00082 | 0.00056 | 0.00051 |
| 1.8E-06 | 0.00413 | 0.00181 | -0.0001 | 0.00096 | 0.0013  |
| 1.8E-06 | 0.00409 | 0.00176 | 3.5E-05 | -0.0005 | 0.00098 |
| 1.8E-06 | 0.00346 | 0.00212 | 5.3E-05 | 0.00045 | 0.00073 |
| 1.9E-06 | 0.00381 | 0.00193 | 0.0005  | 0.00012 | 0.00121 |
| 1.9E-06 | 0.00384 | 0.00122 | 0.00075 | 0.00051 | 0.00066 |
| 1.9E-06 | 0.00321 | 0.00148 | 0.00067 | 1.8E-05 | -0.0005 |
| 2E-06   | 0.00392 | 0.0009  | 4.5E-05 | -0.0001 | 0.00082 |
| 2E-06   | 0.00343 | 0.00101 | 0.00028 | 0.00031 | 0.00173 |
| 2E-06   | 0.00286 | 0.00114 | 0.00047 | -5E-05  | 0.00061 |
| 2E-06   | 0.00296 | 0.00139 | 0.00086 | -0.0001 | 0.00112 |
| 2.1E-06 | 0.00362 | 0.00066 | 0.00011 | 0.00037 | 0.00043 |
| 2.1E-06 | 0.00357 | 0.00089 | -0.0003 | -6E-06  | 0.00101 |
| 2.1E-06 | 0.00357 | 0.00084 | -0.0004 | 0.00093 | 0.00018 |
| 2.2E-06 | 0.00313 | 0.00094 | 0.00043 | -0.0003 | 0.00083 |
| 2.2E-06 | 0.00296 | 0.00067 | 0.00065 | -0.0005 | 0.00129 |
| 2.2E-06 | 0.00287 | 0.00138 | -0.0004 | 8E-06   | 0.00173 |
| 2.3E-06 | 0.00252 | 0.00094 | -0.0001 | 1.7E-05 | 0.00116 |

|         |         |         |         |         |         |
|---------|---------|---------|---------|---------|---------|
| 2.3E-06 | 0.00245 | 0.00095 | -0.0003 | -0.0001 | 0.0006  |
| 2.3E-06 | 0.00298 | 0.0018  | 0.00015 | 0.00024 | 0.00047 |
| 2.4E-06 | 0.00307 | 0.00109 | 0.00026 | 0.00061 | 0.00122 |
| 2.4E-06 | 0.00206 | 4E-05   | -0.0001 | -0.0001 | 0.00039 |
| 2.4E-06 | 0.00213 | 0.0004  | -0.0002 | -0.0004 | 0.00047 |
| 2.5E-06 | 0.0025  | 4.7E-05 | 0.00016 | -0.0002 | 0.00114 |
| 2.5E-06 | 0.00289 | 0.00132 | -0.0001 | -0.0009 | 0.00043 |
| 2.5E-06 | 0.00197 | 0.001   | 3.8E-05 | -0.0006 | 0.0016  |
| 2.6E-06 | 0.00198 | 0.00058 | -0.0001 | 0.00022 | 0.00122 |
| 2.6E-06 | 0.00231 | 3.1E-05 | 0.00037 | 0.00059 | 0.00034 |
| 2.6E-06 | 0.0025  | 0.00039 | -0.0003 | -0.001  | 0.00066 |
| 2.7E-06 | 0.00131 | 3.1E-05 | -0.0004 | -0.0009 | 0.00022 |
| 2.7E-06 | 0.00204 | 0.00055 | -0.001  | -0.0002 | 0.00102 |
| 2.7E-06 | 0.00211 | 0.00072 | -0.0005 | 0.00021 | 0.00099 |
| 2.8E-06 | 0.00234 | 0.00054 | 1.9E-05 | -0.0005 | 0.00035 |
| 2.8E-06 | 0.00211 | 0.0007  | -0.0003 | 0.00045 | 0.00106 |
| 2.8E-06 | 0.00204 | 0.00024 | -7E-05  | -0.0009 | 0.00082 |
| 2.8E-06 | 0.00216 | 0.00088 | -0.0003 | -0.0006 | 0.00106 |
| 2.9E-06 | 0.00119 | 0.00057 | -0.0004 | -0.0004 | 0.00069 |
| 2.9E-06 | 0.00104 | 0.00079 | -1E-04  | -0.0006 | 0.00052 |
| 2.9E-06 | 0.00195 | -0.0001 | 3.2E-06 | 5.9E-05 | 0.0007  |
| 3E-06   | 0.00123 | 0.00045 | -0.0006 | -0.0009 | 0.00128 |
| 3E-06   | 0.00182 | 0.00042 | -0.0002 | -0.0002 | 0.00064 |
| 3E-06   | 0.00212 | 0.00026 | 8.6E-06 | -0.0007 | 0.00058 |
| 3.1E-06 | 0.0016  | 0.00071 | -0.0001 | -0.0001 | 0.00066 |
| 3.1E-06 | 0.00215 | 0.00085 | -0.0008 | 6.8E-05 | 0.00059 |
| 3.1E-06 | 0.00168 | 0.00026 | 0.00038 | 0.00035 | 0.0006  |
| 3.2E-06 | 0.00193 | -4E-05  | 0.00054 | -0.0012 | 0.00069 |
| 3.2E-06 | 0.00202 | 0.00046 | 0.00013 | -0.0012 | 0.00083 |
| 3.2E-06 | 0.00183 | 0.00014 | -0.0002 | -0.0003 | 0.00064 |
| 3.3E-06 | 0.00184 | 5.7E-05 | 0.00042 | 0.00017 | 0.00041 |
| 3.3E-06 | 0.00174 | -0.0003 | -0.0008 | 0.00017 | 0.00049 |
| 3.3E-06 | 0.00144 | 9.7E-05 | -0.0004 | -0.0004 | 4.1E-05 |
| 3.4E-06 | 0.00195 | 7E-06   | -0.0007 | 0.0003  | 0.00063 |
| 3.4E-06 | 0.00218 | 0.00039 | -0.0008 | -0.0002 | 6.9E-05 |
| 3.4E-06 | 0.00217 | 0.00024 | -8E-05  | -0.0006 | 0.00033 |
| 3.5E-06 | 0.00162 | 0.00011 | -0.0007 | -0.0005 | 0.00044 |
| 3.5E-06 | 0.00136 | -1E-04  | -9E-06  | -0.0006 | 0.0007  |
| 3.5E-06 | 0.00096 | 0.00065 | -0.0002 | 0.00052 | 0.0008  |
| 3.6E-06 | 0.00095 | 0.00024 | 1.6E-05 | 0.00021 | 0.00091 |
| 3.6E-06 | 0.00115 | 0.0005  | 6.3E-05 | 0.00016 | 0.00115 |
| 3.6E-06 | 0.00156 | -0.0003 | 0.00017 | -0.0006 | 0.00079 |
| 3.6E-06 | 0.00183 | -0.0006 | -5E-05  | -0.0002 | 0.00118 |
| 3.7E-06 | 0.00174 | 1.7E-05 | -0.0004 | 9.7E-05 | 0.00066 |
| 3.7E-06 | 0.0015  | 0.0002  | -0.0007 | -9E-05  | 5.8E-05 |
| 3.7E-06 | 0.00189 | -0.0003 | -0.0003 | 0.00039 | 0.001   |
| 3.8E-06 | 0.00069 | -0.0003 | -0.0007 | 1.3E-05 | 0.00076 |
| 3.8E-06 | 0.00107 | 0.00028 | -0.001  | -0.0006 | 0.00091 |
| 3.8E-06 | 0.00138 | 0.0007  | -3E-05  | 0.0004  | 0.00048 |
| 3.9E-06 | 0.00139 | 0.00045 | -0.0007 | 0.00019 | 0.00121 |
| 3.9E-06 | 0.00159 | 0.00065 | -0.0008 | -0.0002 | 0.00077 |
| 3.9E-06 | 0.00067 | 8.3E-05 | -0.0009 | -9E-05  | 0.001   |
| 4E-06   | 0.0014  | -7E-05  | -0.0005 | -0.0006 | 0.00144 |
| 4E-06   | 0.00141 | -2E-05  | -0.0008 | -0.0007 | 0.00125 |

|         |         |         |         |         |         |
|---------|---------|---------|---------|---------|---------|
| 4E-06   | 0.00105 | -0.0005 | -0.0008 | -0.0002 | 0.00123 |
| 4.1E-06 | 0.00128 | 0.00023 | -0.001  | -0.0002 | 0.00062 |
| 4.1E-06 | 0.00151 | 0.0007  | -0.0004 | -0.0005 | 0.00047 |
| 4.1E-06 | 0.00135 | 6.1E-05 | -0.0008 | 0.0002  | 0.00049 |
| 4.2E-06 | 0.00079 | 7.1E-05 | -0.0008 | -0.0002 | 0.00093 |
| 4.2E-06 | 0.00119 | 0.00034 | -0.0003 | 0.00061 | 3.6E-05 |
| 4.2E-06 | 0.00026 | 0.00017 | -0.0008 | 0.0004  | 0.001   |
| 4.3E-06 | 0.00089 | 0.00035 | -0.0011 | 0.00022 | 4.6E-05 |
| 4.3E-06 | 0.00099 | 0.00014 | -0.0003 | -0.0007 | 0.00051 |
| 4.3E-06 | 0.00104 | 0.00051 | -0.0001 | 0.00027 | 0.00069 |
| 4.4E-06 | 0.00098 | -0.0004 | 0.00017 | -0.0012 | 0.00012 |
| 4.4E-06 | 0.00143 | 0.00027 | -1E-05  | -0.0004 | 0.00136 |
| 4.4E-06 | 6.4E-05 | 6.6E-05 | -0.0004 | 0.00026 | 0.00052 |
| 4.4E-06 | 0.00092 | 9.9E-05 | -0.0002 | -0.0002 | 0.00085 |
| 4.5E-06 | 0.00033 | -2E-06  | -0.0002 | -0.0005 | 0.00089 |
| 4.5E-06 | 0.00071 | 0.00134 | -0.0004 | -0.0001 | 0.00015 |
| 4.5E-06 | 0.00066 | -0.0004 | 0.00064 | -0.0002 | 0.00132 |
| 4.6E-06 | 0.00094 | -0.0002 | 0.00043 | -0.0002 | 0.00073 |
| 4.6E-06 | 0.0004  | 0.00077 | -0.0001 | 0.00029 | 0.00031 |
| 4.6E-06 | 0.00099 | -0.0002 | -0.0004 | -0.0008 | 0.0006  |
| 4.7E-06 | 0.00129 | -0.0002 | -0.0004 | -0.0004 | 0.00056 |
| 4.7E-06 | 0.00154 | -0.0002 | -0.0001 | -0.0003 | 0.00108 |
| 4.7E-06 | 0.00074 | 0.00031 | -0.0005 | 2.4E-05 | 0.0009  |
| 4.8E-06 | 0.00103 | 0.00073 | -1E-04  | -0.0005 | 0.00104 |
| 4.8E-06 | 0.00116 | -2E-05  | 0.00017 | 0.00045 | 0.00103 |
| 4.8E-06 | 0.00145 | -0.0006 | -0.0009 | -0.0006 | 0.0009  |
| 4.9E-06 | 0.00095 | -0.0005 | -0.0008 | -0.0002 | 0.00088 |
| 4.9E-06 | 0.00082 | -6E-05  | -0.0001 | 8.6E-07 | 0.00067 |
| 4.9E-06 | 0.00063 | 0.00076 | -0.0004 | -0.0004 | 0.00063 |
| 5E-06   | 0.00116 | 0.00023 | -0.0005 | -0.0005 | 0.00066 |
| 5E-06   | 0.00092 | -0.0003 | 4.5E-05 | -0.0001 | 0.00067 |
| 5E-06   | 0.00119 | -0.0007 | -0.0003 | -0.0007 | 0.00055 |
| 5.1E-06 | 0.00081 | 0.00045 | 1.5E-05 | -0.0005 | 0.00053 |
| 5.1E-06 | 0.00085 | 0.00055 | -0.0006 | -0.0004 | 0.00108 |
| 5.1E-06 | 0.00159 | 0.00014 | -7E-05  | 0.00033 | 0.00059 |
| 5.2E-06 | 0.00113 | -0.0001 | -0.0006 | -0.0002 | 0.00187 |
| 5.2E-06 | 0.00045 | 0.0007  | -0.0008 | -0.0006 | 0.00132 |
| 5.2E-06 | 0.00134 | 7.5E-05 | -0.0004 | 9.4E-05 | 0.00073 |
| 5.2E-06 | 0.00085 | -0.0004 | -0.0006 | -0.0005 | 0.00016 |
| 5.3E-06 | 9.5E-05 | 4.4E-05 | -0.0003 | -0.0005 | 0.00143 |
| 5.3E-06 | 0.00082 | 0.00057 | 0.00029 | 4.8E-05 | 0.00106 |
| 5.3E-06 | 0.00062 | -7E-05  | -0.0012 | -1E-04  | 0.00026 |
| 5.4E-06 | 0.00034 | -0.0005 | -7E-05  | -0.0005 | 0.00059 |
| 5.4E-06 | 7.1E-05 | 3.1E-05 | -0.0008 | -0.0002 | 0.00094 |
| 5.4E-06 | 0.0007  | 0.00077 | -0.0001 | -0.0009 | 0.0009  |
| 5.5E-06 | 0.00046 | -3E-05  | 0.0002  | -0.0005 | 0.0003  |
| 5.5E-06 | 0.0009  | -4E-05  | -0.0006 | -0.0004 | 0.00168 |
| 5.5E-06 | 0.00015 | 1.7E-05 | -0.0004 | -0.0003 | 0.00046 |
| 5.6E-06 | 0.00025 | -0.0004 | -0.001  | -0.0001 | 0.00098 |
| 5.6E-06 | 7.1E-05 | -0.0002 | -0.0009 | 0.00073 | 0.00055 |
| 5.6E-06 | -0.0003 | 0.00036 | -0.0004 | -0.0004 | 0.00126 |
| 5.7E-06 | 0.00069 | -0.0005 | -0.0008 | -0.0004 | 0.00076 |
| 5.7E-06 | 0.00095 | 0.00039 | -0.0002 | -0.0006 | 0.00095 |
| 5.7E-06 | 0.00034 | -0.0003 | -0.0006 | -0.0008 | 0.001   |

|         |         |         |         |         |         |
|---------|---------|---------|---------|---------|---------|
| 5.8E-06 | 0.0008  | -3E-06  | -0.0007 | -0.0005 | 0.00093 |
| 5.8E-06 | 0.00095 | 3.8E-05 | -0.0003 | 8.6E-05 | 0.00107 |
| 5.8E-06 | -0.0002 | 0.00046 | -0.0003 | -0.0002 | 1.7E-05 |
| 5.9E-06 | 0.00086 | -2E-05  | -0.0004 | 7.1E-05 | 0.00066 |
| 5.9E-06 | 0.00037 | 8E-05   | -0.0002 | 0.00027 | 8.8E-05 |
| 5.9E-06 | 0.00087 | -0.0003 | -0.0002 | 0.00012 | 0.00056 |
| 6E-06   | 0.00057 | 0.00035 | -0.001  | -0.0004 | 0.00084 |
| 6E-06   | 0.00075 | 0.00056 | -0.0007 | -8E-05  | 0.0015  |
| 6E-06   | 0.00073 | 0.00022 | -0.0009 | -0.0002 | 0.00073 |
| 6E-06   | 0.00035 | -2E-05  | -0.0007 | -0.0002 | 0.00084 |
| 6.1E-06 | 0.00025 | 7.2E-05 | -0.001  | -0.0007 | 0.00083 |
| 6.1E-06 | 0.00045 | 4.5E-05 | -0.0002 | -0.0008 | 0.00128 |
| 6.1E-06 | 0.00064 | -0.0001 | -0.0004 | -0.0009 | 0.00034 |
| 6.2E-06 | -0.0005 | 0.00014 | 0.00026 | -0.0008 | 0.00047 |
| 6.2E-06 | 0.00056 | -1E-04  | -0.0002 | -0.0001 | 0.00018 |
| 6.2E-06 | 0.00081 | 0.00077 | -0.0008 | 0.00017 | 0.00066 |
| 6.3E-06 | 0.00065 | 0.00016 | 0.00026 | 0.00028 | 0.00048 |
| 6.3E-06 | 0.00025 | -3E-05  | -0.001  | 0.00017 | 0.00021 |
| 6.3E-06 | 0.00053 | -0.0002 | -0.0001 | -0.0002 | 0.0012  |
| 6.4E-06 | 0.00034 | -0.0002 | -0.0005 | -0.001  | 0.00075 |
| 6.4E-06 | 0.00047 | 0.00066 | -0.001  | -0.0006 | 0.00074 |
| 6.4E-06 | -0.0002 | 0.00068 | -0.0007 | 1.7E-05 | 2.8E-05 |
| 6.5E-06 | 0.00048 | -6E-05  | -0.0002 | -0.0005 | 0.00046 |
| 6.5E-06 | 0.00094 | 0.00029 | -0.0006 | -0.0003 | 0.00033 |
| 6.5E-06 | 0.00127 | -0.0001 | -0.0003 | -0.0005 | 0.00012 |
| 6.6E-06 | 0.00032 | -0.0003 | -0.0003 | -0.001  | 0.00131 |
| 6.6E-06 | 0.00046 | -0.0002 | -3E-05  | 0.00011 | 0.00118 |
| 6.6E-06 | 0.00082 | -0.0001 | -0.0003 | -0.0005 | 0.0004  |
| 6.7E-06 | -0.0001 | 0.0006  | -0.0005 | -0.0004 | 0.00113 |
| 6.7E-06 | 0.00075 | 3.1E-05 | -0.0001 | -0.0004 | 0.00104 |
| 6.7E-06 | 0.00068 | -0.0004 | -0.0001 | -0.0006 | 0.00056 |
| 6.8E-06 | 0.00037 | 0.00047 | -0.0007 | -0.0007 | 0.00035 |
| 6.8E-06 | 0.00033 | 2.9E-06 | -0.0003 | -0.0002 | 0.00062 |
| 6.8E-06 | 8.6E-05 | 0.00011 | -0.0002 | 0.0001  | 0.00089 |
| 6.8E-06 | 0.00112 | 0.00048 | -0.0007 | -8E-05  | -0.0002 |
| 6.9E-06 | 0.00097 | 4.3E-05 | -0.0006 | -0.0008 | 0.00058 |
| 6.9E-06 | 0.00012 | -0.0004 | -0.0002 | -0.0004 | 0.00083 |
| 6.9E-06 | 0.00043 | -0.0003 | -0.0006 | -0.0005 | 0.00091 |
| 7E-06   | 0.00076 | -0.0003 | -0.0006 | 0.00021 | 0.00065 |
| 7E-06   | -0.0005 | 0.00013 | -0.0007 | -0.0001 | 0.00017 |
| 7E-06   | 0.00049 | -0.001  | 0.00019 | -0.001  | 0.00084 |
| 7.1E-06 | 0.00045 | 7.8E-06 | -0.0007 | -0.0007 | 0.00067 |
| 7.1E-06 | 0.00031 | 0.00041 | -0.0007 | 8.6E-06 | 0.00097 |
| 7.1E-06 | 0.00076 | 0.00048 | -0.0004 | -0.0009 | 0.00063 |
| 7.2E-06 | 0.00034 | -0.0003 | -0.0004 | -0.0004 | 0.00045 |
| 7.2E-06 | 8.3E-05 | 0.0008  | -4E-05  | 0.00049 | 0.00089 |
| 7.2E-06 | 0.00051 | 0.00045 | -0.0002 | -0.0002 | 0.0009  |
| 7.3E-06 | 0.00065 | 0.00034 | -0.0011 | -0.0004 | 0.00074 |
| 7.3E-06 | 0.00092 | 0.00017 | -0.0004 | -0.0003 | 0.00032 |
| 7.3E-06 | 0.00019 | 0.00063 | 6.4E-05 | -0.0004 | 0.00083 |
| 7.4E-06 | 0.00113 | 4.8E-05 | 0.00018 | -0.0007 | 0.00076 |
| 7.4E-06 | 0.00038 | 6.8E-05 | -0.0002 | -0.0005 | 0.00094 |
| 7.4E-06 | 0.00089 | -0.0005 | 0.00022 | -9E-05  | 0.00089 |
| 7.5E-06 | 0.001   | 0.00016 | -0.0004 | 0.00014 | 0.00081 |

|         |         |         |         |         |         |
|---------|---------|---------|---------|---------|---------|
| 7.5E-06 | 0.00048 | 0.0002  | 3.5E-05 | 0.00035 | 0.00183 |
| 7.5E-06 | 0.00056 | -9E-05  | -0.0004 | 7E-05   | 0.00095 |
| 7.6E-06 | 0.00054 | 0.00056 | -0.0006 | -8E-05  | 0.00114 |
| 7.6E-06 | 0.00022 | -1E-04  | -0.0009 | 0.00025 | 0.00086 |
| 7.6E-06 | 0.00074 | -0.0003 | -0.0004 | 0.00024 | 0.00071 |
| 7.6E-06 | 0.00045 | 0.00023 | -0.0005 | -9E-05  | 0.00014 |
| 7.7E-06 | 0.0004  | -6E-05  | 0.00022 | -0.0003 | 0.00093 |
| 7.7E-06 | 0.00028 | 9.7E-05 | -0.0007 | 9.1E-05 | 0.00037 |
| 7.7E-06 | -0.0003 | -0.0004 | -0.0004 | 0.00042 | 0.00074 |
| 7.8E-06 | 0.001   | -0.0001 | -0.0005 | -0.0004 | 0.0013  |
| 7.8E-06 | 0.0004  | 9.9E-05 | -0.0001 | -0.0001 | 0.00084 |
| 7.8E-06 | 0.00041 | 7.1E-05 | -0.0003 | 0.00022 | -5E-05  |
| 7.9E-06 | 0.0006  | -0.0005 | -0.0005 | -1E-04  | 0.0006  |
| 7.9E-06 | 0.00091 | 0.00034 | -0.001  | -0.0008 | 0.00064 |
| 7.9E-06 | 0.00071 | 0.00047 | 5.7E-05 | -0.0008 | 0.00018 |
| 8E-06   | 0.0007  | 0.00033 | -0.0003 | 0.00033 | 0.00093 |
| 8E-06   | 0.00107 | 0.00043 | -0.0002 | 7.6E-05 | 0.00044 |
| 8E-06   | 0.00034 | 7.9E-05 | -0.0005 | -8E-05  | 0.00068 |
| 8.1E-06 | 0.00068 | 0.00031 | -0.0005 | 0.00018 | 0.00048 |
| 8.1E-06 | 0.00033 | -0.0005 | -0.0002 | -0.0006 | 0.00079 |
| 8.1E-06 | 0.00089 | 0.00063 | 0.00048 | 3.3E-05 | 0.00091 |
| 8.2E-06 | 0.00016 | 0.00011 | -0.0001 | -0.0005 | 0.00033 |
| 8.2E-06 | 0.00046 | 0.00013 | 0.00026 | -0.0007 | 0.00078 |
| 8.2E-06 | 0.0006  | 0.00063 | -0.0008 | 0.00073 | 0.00076 |
| 8.3E-06 | 0.00028 | -0.0001 | -0.0002 | -0.0008 | 0.00051 |
| 8.3E-06 | 0.0003  | 2.8E-05 | -3E-05  | -0.0012 | 0.00074 |
| 8.3E-06 | 0.00094 | -6E-05  | -0.0006 | -0.0002 | 0.00129 |
| 8.4E-06 | 0.00118 | -9E-05  | -0.0005 | -0.0005 | 0.00125 |
| 8.4E-06 | 0.00041 | 0.0006  | -0.0002 | -1E-05  | 0.0008  |
| 8.4E-06 | 0.00096 | 0.00012 | -0.0009 | -0.0003 | 0.00078 |
| 8.4E-06 | 0.00061 | 0.0001  | -0.0003 | 2.1E-05 | 0.00084 |
| 8.5E-06 | 0.0007  | -6E-05  | -4E-05  | -0.0006 | 0.00036 |
| 8.5E-06 | 0.00029 | 1.6E-05 | 0.00024 | 0.00071 | 0.0014  |
| 8.5E-06 | 0.00081 | 0.00101 | -0.0005 | -0.0005 | 0.00149 |
| 8.6E-06 | 0.00056 | 0.00046 | -0.001  | -0.0005 | 0.00086 |
| 8.6E-06 | 0.0009  | -0.0003 | -0.0003 | -0.0002 | 0.0007  |
| 8.6E-06 | 0.00076 | -0.0002 | -0.0007 | -6E-06  | 0.00088 |
| 8.7E-06 | 0.0005  | -7E-05  | -0.0004 | -0.0001 | 0.00118 |
| 8.7E-06 | 0.00061 | 0.00052 | -0.0011 | -0.0003 | 0.00051 |
| 8.7E-06 | 0.00059 | 0.00072 | -0.0006 | -0.0001 | 0.00149 |
| 8.8E-06 | 0.0001  | 0.00025 | -0.0005 | -0.0008 | 0.00112 |
| 8.8E-06 | 0.00027 | 0.00057 | -0.0009 | -0.0009 | 0.00085 |
| 8.8E-06 | 0.00039 | 0.0005  | -0.0006 | -6E-05  | 0.00064 |
| 8.9E-06 | 0.00057 | 0.00019 | -0.0009 | -0.0006 | 0.00097 |
| 8.9E-06 | 0.00079 | 0.00069 | 0.00029 | -0.0002 | 0.00194 |
| 8.9E-06 | 0.00014 | 0.00018 | -0.0005 | -0.001  | 0.00118 |
| 9E-06   | 0.00102 | 0.00017 | 3.2E-06 | -0.0005 | 0.00079 |
| 9E-06   | 0.00065 | -0.0002 | -0.001  | -0.0004 | 0.00119 |
| 9E-06   | 0.00072 | -0.0001 | 0.00017 | -0.0005 | 0.00079 |
| 9.1E-06 | 0.00072 | 0.00032 | -3E-05  | -0.0004 | 0.00055 |
| 9.1E-06 | 0.00122 | 0.0002  | 8.9E-06 | -0.0004 | 0.00017 |
| 9.1E-06 | -9E-05  | 0.00107 | 0.00012 | -0.0005 | 0.00139 |
| 9.2E-06 | 3.2E-05 | 0.00072 | 0.00017 | -0.0002 | 0.00115 |
| 9.2E-06 | 0.00036 | -6E-05  | -0.0004 | -0.0011 | 0.0011  |

|         |         |         |         |         |         |
|---------|---------|---------|---------|---------|---------|
| 9.2E-06 | 0.00075 | 0.00026 | -0.001  | -0.0006 | 0.001   |
| 9.2E-06 | 0.00026 | -0.0007 | -0.0003 | -0.0002 | 0.00086 |
| 9.3E-06 | -0.0002 | 0.00073 | -0.0002 | -0.0011 | 0.0009  |
| 9.3E-06 | 0.00023 | 9.2E-05 | -0.0009 | -0.0005 | 0.00088 |
| 9.3E-06 | 0.00067 | 0.00052 | -0.0009 | -0.0007 | 0.00088 |
| 9.4E-06 | 0.00078 | 0.00028 | 0.00012 | -0.0006 | 0.0008  |
| 9.4E-06 | 0.00044 | -0.0005 | -0.0006 | -0.0008 | 0.00049 |
| 9.4E-06 | 0.00029 | -0.0014 | -0.0006 | -0.0005 | 0.00115 |
| 9.5E-06 | 0.00028 | -0.0006 | -0.0001 | -0.0002 | 0.0014  |
| 9.5E-06 | 0.00055 | -0.0002 | -0.0006 | -0.0007 | 0.00115 |
| 9.5E-06 | 0.00017 | -0.0001 | -0.0003 | -0.0006 | 7E-05   |
| 9.6E-06 | 0.00042 | -0.0005 | -0.0003 | -0.0004 | 0.00071 |
| 9.6E-06 | 0.00064 | -7E-07  | -0.0006 | -0.0002 | 0.00053 |
| 9.6E-06 | 0.00013 | -0.0002 | 7.3E-05 | 0.00022 | 0.00119 |
| 9.7E-06 | 0.00027 | -0.0008 | -0.0003 | -0.0003 | 0.00088 |
| 9.7E-06 | 0.00035 | 8.6E-05 | -0.0004 | -0.0002 | 0.00086 |
| 9.7E-06 | 0.00037 | 0.00026 | -0.0006 | -0.0002 | 0.00036 |
| 9.8E-06 | 0.00077 | 0.00041 | -0.0001 | -0.0004 | 0.00076 |
| 9.8E-06 | 0.00069 | 0.0003  | -0.0008 | -0.0006 | 0.00113 |
| 9.8E-06 | 0.00099 | -0.0002 | -0.001  | 2.2E-05 | 0.00081 |
| 9.9E-06 | 0.00115 | 8.5E-05 | -0.0003 | -0.0005 | 5.3E-05 |
| 9.9E-06 | 0.00084 | -5E-05  | -7E-05  | -0.0004 | 0.00083 |
| 9.9E-06 | 0.00056 | 0.00037 | 0.00042 | -0.0005 | 0.00134 |
| 1E-05   | 0.00076 | 0.00087 | -0.0004 | -0.0006 | 0.0007  |
| 1E-05   | 0.00039 | 0.00016 | -0.0005 | 6.6E-05 | 0.00097 |
| 1E-05   | 0.00043 | 6.5E-05 | 0.00015 | -0.0006 | 0.00111 |
| 1E-05   | 0.00019 | 0.00022 | 7.7E-05 | -0.0001 | 0.00096 |
| 1E-05   | 0.00067 | 0.00093 | 5.9E-05 | -9E-05  | 0.00056 |
| 1E-05   | 0.00092 | -0.0003 | -0.0009 | -0.0008 | 0.00059 |
| 1E-05   | 0.00096 | 0.0003  | -0.0006 | -0.0004 | 0.00085 |
| 1E-05   | 0.00081 | 0.00029 | -0.0007 | -0.0008 | 0.00065 |
| 1E-05   | 0.00087 | 0.00068 | -0.0002 | -0.0007 | 0.00085 |
| 1E-05   | 0.0002  | -0.0009 | -0.0003 | -0.0006 | 0.00063 |
| 1E-05   | 0.00088 | 0.00061 | -0.0005 | -0.0002 | 0.00036 |
| 1E-05   | 0.00027 | 4.7E-05 | -0.0001 | 0.0001  | 0.00068 |
| 1E-05   | 0.00046 | -0.0006 | -0.0004 | -0.0007 | 0.00078 |
| 1E-05   | 0.00059 | -0.0004 | -0.0012 | -0.0005 | 0.0007  |
| 1E-05   | 0.00012 | -0.0003 | -0.0006 | -0.0004 | 0.00053 |
| 1E-05   | 0.00043 | 0.00017 | -0.0006 | 0.00034 | 0.00047 |
| 1E-05   | -0.0003 | -8E-05  | -0.0005 | 0.00017 | 0.00044 |
| 1.1E-05 | 0.00071 | -0.0004 | -0.0013 | -0.0002 | 0.00085 |
| 1.1E-05 | 0.00046 | -0.0002 | -0.0006 | -0.0013 | 0.00104 |
| 1.1E-05 | 0.00032 | 0.00039 | -6E-05  | -0.0004 | 0.00099 |
| 1.1E-05 | 0.00078 | 0.00024 | -0.0009 | -0.0002 | 0.00023 |
| 1.1E-05 | 0.00113 | 0.0003  | -0.0001 | -8E-05  | 0.00087 |
| 1.1E-05 | 0.0009  | 0.00016 | -0.0005 | 0.0001  | 0.00075 |
| 1.1E-05 | 0.00055 | -0.0003 | -0.0002 | -0.0003 | 0.00031 |
| 1.1E-05 | 0.00029 | 0.00069 | -0.0004 | -0.0001 | 0.00096 |
| 1.1E-05 | 0.00101 | 7.4E-05 | -0.0012 | 0.00023 | 0.00083 |
| 1.1E-05 | 0.00016 | 0.00021 | -0.0004 | 0.00073 | 0.00096 |
| 1.1E-05 | 0.00035 | 0.00013 | 6.9E-05 | -0.0004 | -0.0001 |
| 1.1E-05 | 0.00022 | 2.3E-05 | 0.00036 | -0.0004 | 0.00012 |
| 1.1E-05 | 0.00113 | 7.7E-05 | -4E-05  | -2E-05  | 0.00099 |
| 1.1E-05 | 0.00108 | 0.00022 | 8.1E-05 | 0.00014 | 0.00077 |

|         |         |         |         |         |         |
|---------|---------|---------|---------|---------|---------|
| 1.1E-05 | 0.0007  | -0.0002 | -0.0009 | -2E-05  | -4E-05  |
| 1.1E-05 | 0.0005  | 0.00047 | -0.001  | -0.0003 | 0.00082 |
| 1.1E-05 | 0.00095 | -0.0005 | -0.0004 | -0.0006 | 0.00077 |
| 1.1E-05 | 0.00072 | -0.0001 | -0.0004 | -0.0003 | 0.00174 |
| 1.1E-05 | 0.00021 | 0.00011 | -0.0007 | -0.0005 | 0.0009  |
| 1.1E-05 | 0.00084 | -0.0002 | -0.0009 | 8.6E-05 | 0.00028 |
| 1.1E-05 | 0.00079 | -0.0001 | -0.0012 | 0.00014 | 0.00071 |
| 1.1E-05 | 0.00067 | -0.0002 | -0.0004 | -0.0002 | 0.00041 |
| 1.1E-05 | -9E-05  | 3.6E-05 | -0.0003 | 0.00067 | 0.00137 |
| 1.1E-05 | 0.00021 | -0.0007 | -0.001  | -0.0006 | 0.0004  |
| 1.1E-05 | 0.00029 | 0.0004  | 0.00026 | -0.0003 | 0.00075 |
| 1.1E-05 | 0.0002  | 0.00062 | -0.0004 | 0.00022 | 0.00053 |
| 1.1E-05 | 0.00055 | -7E-06  | -0.0006 | 0.00023 | 0.0012  |
| 1.1E-05 | 0.00051 | 0.00047 | -0.0008 | -0.0002 | 0.0009  |
| 1.1E-05 | 0.00058 | -0.0004 | -0.0002 | -0.0006 | 0.00048 |
| 1.1E-05 | 0.00064 | 0.00021 | -0.0009 | -0.0003 | 0.00092 |
| 1.1E-05 | 0.00077 | 0.00014 | -0.0005 | 6.1E-05 | 0.00031 |
| 1.1E-05 | 0.00038 | -0.0002 | -0.0006 | -0.0002 | 0.00057 |
| 1.2E-05 | 0.00093 | -0.0001 | -0.0005 | -0.0007 | 0.00101 |
| 1.2E-05 | 0.00074 | 0.00088 | 4.1E-05 | -1E-05  | 0.00125 |
| 1.2E-05 | 0.00023 | 4.9E-05 | -2E-05  | -0.0008 | 0.00115 |
| 1.2E-05 | 0.0007  | 0.00033 | -1E-05  | -0.0004 | 0.00063 |
| 1.2E-05 | 0.00067 | -0.0006 | -8E-05  | -0.0008 | 0.00061 |
| 1.2E-05 | 0.00032 | 0.00013 | -0.0009 | 0.00032 | 0.00072 |
| 1.2E-05 | 0.00052 | 0.00063 | -0.0008 | -0.0008 | 0.00089 |
| 1.2E-05 | 0.00082 | 0.00012 | -0.0007 | -0.001  | 0.00078 |
| 1.2E-05 | 0.00078 | 0.00041 | -5E-05  | -0.0005 | 0.00029 |
| 1.2E-05 | 0.00054 | 0.00074 | -0.0003 | -0.0005 | 0.00071 |
| 1.2E-05 | 0.00063 | -0.0005 | -0.0007 | -0.0007 | 0.00078 |
| 1.2E-05 | 0.00023 | -0.0005 | -0.0008 | 2.3E-05 | -0.0001 |
| 1.2E-05 | 0.00031 | -0.0003 | -0.0009 | 0.00016 | 0.00128 |
| 1.2E-05 | 0.00049 | -0.0005 | -0.001  | 0.00045 | 0.00094 |
| 1.2E-05 | 0.00041 | -0.0005 | -0.0009 | -0.0005 | 0.00028 |
| 1.2E-05 | 0.00059 | -0.0004 | -0.0004 | 2.7E-05 | 0.00083 |
| 1.2E-05 | 0.00021 | -0.0003 | -0.0003 | 7.6E-05 | 0.00037 |
| 1.2E-05 | -8E-05  | -0.0006 | -0.0006 | 0.00041 | 0.00055 |
| 1.2E-05 | 0.00084 | 0.00011 | -0.0007 | 8.5E-05 | 0.00111 |
| 1.2E-05 | 0.00018 | -0.0002 | 0.00035 | -0.0001 | 0.00058 |
| 1.2E-05 | 0.00032 | -0.0004 | -0.0003 | -0.0006 | 0.00054 |
| 1.2E-05 | 0.00056 | 3.6E-05 | -0.0002 | -7E-05  | 0.00111 |
| 1.2E-05 | 0.00024 | 0.00011 | -0.0008 | 0.00032 | 0.00129 |
| 1.2E-05 | 0.00041 | 0.0004  | -0.0008 | -0.0005 | 0.0006  |
| 1.2E-05 | 0.00092 | -0.0001 | -0.0005 | 0.00043 | 0.0012  |
| 1.2E-05 | 0.00121 | -0.0005 | -0.0001 | -0.0003 | 0.00073 |
| 1.2E-05 | 0.00082 | 0.00027 | -0.0004 | 0.00054 | 0.00108 |
| 1.2E-05 | 0.00097 | -0.0001 | -0.0005 | -0.0004 | 0.00085 |
| 1.2E-05 | 0.00077 | -0.0004 | -0.0003 | -0.0005 | 0.00051 |
| 1.2E-05 | 0.0003  | -0.0001 | -0.0003 | -0.0003 | 0.00065 |
| 1.2E-05 | 0.00039 | -0.0002 | -0.0009 | 0.00073 | 0.00136 |
| 1.3E-05 | 0.00037 | 0.00045 | -0.0012 | -0.0003 | 0.00177 |
| 1.3E-05 | 0.00051 | 0.00048 | -0.0009 | -0.0005 | 0.00051 |
| 1.3E-05 | 0.00069 | 6.2E-05 | -0.0006 | 8.8E-06 | 0.00039 |
| 1.3E-05 | 0.00059 | -3E-05  | -0.0004 | 0.00015 | 0.00044 |
| 1.3E-05 | 0.0001  | -0.0002 | -0.0005 | 6.6E-05 | 0.00094 |

|         |         |         |         |         |         |
|---------|---------|---------|---------|---------|---------|
| 1.3E-05 | 1.7E-05 | 7.9E-07 | -0.0007 | 0.00052 | 0.00076 |
| 1.3E-05 | 0.00035 | 0.00038 | -0.0008 | -0.0004 | 0.00024 |
| 1.3E-05 | 0.00098 | 0.00037 | -0.0003 | -8E-06  | 0.00065 |
| 1.3E-05 | 0.00072 | -0.0001 | -0.0011 | 3.5E-05 | 0.00057 |
| 1.3E-05 | 0.00073 | 0.00035 | -0.001  | -2E-05  | 0.00109 |
| 1.3E-05 | 0.0008  | 0.00031 | 0.00011 | -0.0011 | 0.00091 |
| 1.3E-05 | 0.00117 | -0.0001 | -0.0009 | -0.0017 | 0.00027 |
| 1.3E-05 | 0.00073 | 0.00014 | -0.0003 | -0.0007 | 0.00042 |
| 1.3E-05 | 1.2E-05 | 4.6E-05 | -0.0008 | -0.0003 | 0.00097 |
| 1.3E-05 | 0.00074 | -4E-05  | -0.0004 | -7E-05  | 0.00107 |
| 1.3E-05 | 0.00065 | -0.0005 | -0.0008 | -0.0006 | 0.00063 |
| 1.3E-05 | 0.00077 | 0.0002  | 0.00018 | -0.0004 | 0.00046 |
| 1.3E-05 | 0.00074 | -2E-05  | -0.0007 | -0.0003 | -0.0002 |
| 1.3E-05 | 0.00082 | 0.0003  | -0.0005 | -0.0004 | 0.00082 |
| 1.3E-05 | 0.0008  | -0.0002 | -0.0003 | 0.00031 | 0.00056 |
| 1.3E-05 | 0.00077 | 2.2E-06 | -0.0002 | -0.0001 | 0.00056 |
| 1.3E-05 | 2E-05   | 0.00018 | -0.0007 | 0.00013 | 0.00032 |
| 1.3E-05 | 0.00034 | 0.00079 | -0.0008 | -0.0007 | 0.00042 |
| 1.3E-05 | 0.00033 | 0.00046 | -0.0005 | -0.0003 | 5E-05   |
| 1.3E-05 | -0.0002 | 0.00051 | -0.0005 | -3E-05  | 0.00066 |
| 1.3E-05 | 0.00011 | 3.7E-06 | -0.0005 | -0.0006 | 0.00101 |
| 1.3E-05 | 0.0005  | -0.0006 | -0.0005 | -0.0006 | 0.00124 |
| 1.3E-05 | 0.00017 | -2E-05  | -0.0008 | -0.0006 | 0.00045 |
| 1.3E-05 | 0.00074 | -0.0004 | 3.1E-05 | -0.0002 | 0.00076 |
| 1.3E-05 | 0.0009  | -0.0007 | -0.0004 | 0.00077 | 0.00065 |
| 1.3E-05 | 0.00046 | -9E-05  | -0.0007 | -0.0002 | 0.00055 |
| 1.4E-05 | 0.00082 | -9E-05  | -0.001  | 0.00026 | 0.00078 |
| 1.4E-05 | 0.00028 | 5.4E-05 | 0.00046 | 4.6E-05 | 0.00093 |
| 1.4E-05 | 0.001   | -8E-05  | 0.00038 | -0.0006 | 0.00056 |
| 1.4E-05 | 0.00094 | 3.4E-05 | -0.0003 | 0.00022 | 0.00112 |
| 1.4E-05 | 0.00079 | -0.0002 | -0.0001 | -0.0005 | 0.00169 |
| 1.4E-05 | 0.00052 | -0.0002 | -0.001  | -0.0008 | 0.00085 |
| 1.4E-05 | 0.0007  | -0.0007 | 0.0003  | -0.0002 | 0.00094 |
| 1.4E-05 | 0.00052 | -3E-06  | -0.0002 | 0.00024 | 0.00049 |
| 1.4E-05 | -0.0001 | -0.0006 | -5E-05  | -0.0009 | 0.00071 |
| 1.4E-05 | 0.0004  | -0.0006 | -0.0003 | -0.0004 | 0.00094 |
| 1.4E-05 | 0.00071 | 0.00019 | -0.0006 | 0.00034 | 0.00075 |
| 1.4E-05 | 0.00132 | -0.0002 | 0.00033 | 8.2E-05 | -6E-05  |
| 1.4E-05 | 5.2E-05 | 0.00033 | -0.0006 | -0.0008 | 0.00106 |
| 1.4E-05 | 0.00059 | -0.0003 | -0.0006 | 0.00047 | 0.00106 |
| 1.4E-05 | 0.00056 | 0.00051 | -0.0002 | -6E-05  | 0.00061 |
| 1.4E-05 | 8.3E-06 | -0.0005 | -0.0004 | -0.0007 | 0.00119 |
| 1.4E-05 | 0.00075 | 0.0005  | -0.0005 | -0.0002 | 0.00041 |
| 1.4E-05 | 6.9E-05 | -0.0002 | -0.0006 | -0.0005 | 0.0013  |
| 1.4E-05 | 0.00076 | -0.0006 | 3.4E-05 | -0.0002 | 0.00036 |
| 1.4E-05 | 0.00032 | -0.0005 | -0.0001 | 4.8E-05 | 0.00057 |
| 1.4E-05 | 0.0002  | 5.8E-05 | -0.0007 | -0.0003 | 0.00055 |
| 1.4E-05 | 0.00058 | -0.0003 | -0.0005 | 0.0003  | -6E-06  |
| 1.4E-05 | 0.00035 | 0.00048 | -0.0002 | -6E-05  | 0.00081 |
| 1.4E-05 | 0.00064 | -0.0007 | 7.9E-06 | 1.6E-05 | 0.00049 |
| 1.4E-05 | 0.00042 | 0.00015 | -0.0009 | 0.00022 | 0.00044 |
| 1.4E-05 | 0.00082 | -0.0001 | 0.00054 | -0.0004 | 0.00114 |
| 1.4E-05 | 0.00059 | -0.0004 | -0.0006 | -0.0011 | 0.00078 |
| 1.4E-05 | 0.0004  | -7E-05  | -0.0004 | -0.0004 | 0.00098 |



|         |         |         |         |         |         |
|---------|---------|---------|---------|---------|---------|
| 1.4E-05 | 0.00039 | 0.00039 | -0.0009 | -0.0002 | 0.00089 |
| 1.4E-05 | 0.00016 | -0.0005 | -0.0004 | 0.00023 | 0.00143 |
| 1.4E-05 | 9E-05   | 0.00017 | -0.0002 | -0.0001 | 0.00068 |
| 1.5E-05 | 0.00019 | -0.0006 | 0.00019 | 3.5E-05 | 0.0008  |
| 1.5E-05 | 0.00053 | 0.00053 | -0.0005 | -0.0007 | 0.00148 |
| 1.5E-05 | 0.00025 | 0.00028 | -0.0009 | -0.0006 | 0.00098 |
| 1.5E-05 | 0.00087 | 0.0004  | -0.0004 | -0.0002 | 0.00119 |
| 1.5E-05 | 0.00025 | 0.00034 | -0.0006 | 9.9E-05 | 0.00122 |
| 1.5E-05 | 0.00023 | 3.6E-05 | -0.0008 | -9E-05  | 0.00144 |
| 1.5E-05 | 0.0004  | -0.0002 | -0.0007 | -0.0002 | 0.00091 |
| 1.5E-05 | 0.0002  | 0.00031 | -0.0006 | 2.9E-05 | 0.00035 |
| 1.5E-05 | 0.00056 | 0.00013 | -0.0004 | 0.0005  | 0.00098 |
| 1.5E-05 | 0.00019 | 0.00037 | -0.0005 | 1.5E-05 | 0.00057 |
| 1.5E-05 | 0.00029 | 0.00023 | -0.0007 | -0.0004 | 0.00109 |
| 1.5E-05 | -8E-05  | 0.00055 | -0.0008 | -0.0003 | 0.00054 |
| 1.5E-05 | 0.00043 | 0.00017 | -0.0005 | -0.001  | 0.00051 |
| 1.5E-05 | 0.00022 | 0.00012 | -0.0006 | -0.0005 | 0.00068 |
| 1.5E-05 | 0.00085 | 0.00091 | -0.0006 | -0.0002 | 0.00117 |
| 1.5E-05 | 0.00034 | 0.00025 | -0.0002 | 0.00021 | 0.00097 |

**Table SI.17:** Primary kinetic data for the reaction of 2-oxazolidinone (**S17**) with CumO• generated by 355 nm LFP in MeCN (**Figure SI.17**).

| t / s   | $\Delta A$ 2-oxazolidinone ( <b>S17</b> ) |         |         |         |
|---------|-------------------------------------------|---------|---------|---------|
|         | 0.595M                                    | 0.982M  | 1.10M   | 1.761M  |
| -1E-06  | 0.00038                                   | 0.00011 | -0.0014 | -0.0001 |
| -1E-06  | 0.00058                                   | 0.00029 | -0.0022 | 0.00058 |
| -9E-07  | -0.0002                                   | 7.1E-05 | -0.0024 | 3.3E-05 |
| -9E-07  | -0.0004                                   | -0.0009 | -0.0011 | -0.0002 |
| -9E-07  | -0.0006                                   | -0.0009 | -0.0014 | -0.0011 |
| -8E-07  | 0.00021                                   | -0.0002 | -0.0019 | -0.0009 |
| -8E-07  | 3.7E-05                                   | -0.0004 | -0.0013 | -0.0008 |
| -8E-07  | -0.0003                                   | -0.0005 | -0.0013 | 0.00028 |
| -7E-07  | 0.00016                                   | -0.0008 | -0.0019 | -0.0009 |
| -7E-07  | 2.8E-05                                   | 0.00024 | -0.0026 | -0.0005 |
| -7E-07  | -0.0003                                   | -7E-05  | -0.0007 | -0.0011 |
| -6E-07  | -0.0002                                   | -0.0002 | -0.0014 | -2E-05  |
| -6E-07  | -0.0001                                   | -0.0007 | -0.002  | 7.9E-05 |
| -6E-07  | -0.0004                                   | -0.0001 | -0.0012 | 0.00011 |
| -5E-07  | -0.0007                                   | -0.001  | -0.0016 | -0.0016 |
| -5E-07  | 0.00011                                   | 0.00013 | -0.0024 | -0.0003 |
| -5E-07  | 0.00035                                   | -0.0005 | -0.0021 | -0.0003 |
| -4E-07  | -0.0001                                   | -0.0002 | -0.0024 | -6E-05  |
| -4E-07  | -0.0005                                   | -0.0009 | -0.0022 | -0.0005 |
| -4E-07  | -0.0006                                   | 0.00021 | -0.0013 | -0.0009 |
| -4E-07  | -0.0004                                   | -8E-05  | -0.0008 | 0.0001  |
| -3E-07  | 0.00062                                   | -0.0002 | -0.0022 | 9.8E-05 |
| -3E-07  | -0.0002                                   | -1E-05  | -0.0017 | -0.0006 |
| -3E-07  | 0.00036                                   | 0.0003  | -0.0015 | -0.001  |
| -2E-07  | 0.00016                                   | 0.00086 | -0.0007 | -9E-05  |
| -2E-07  | 6.8E-05                                   | -0.0003 | -0.0012 | -0.0007 |
| -2E-07  | 0.00057                                   | -0.0004 | -0.0016 | -0.0008 |
| -1E-07  | 0.00019                                   | 0.00025 | -0.0013 | 1.4E-05 |
| -1E-07  | -0.0004                                   | -4E-05  | -0.0019 | 0.00018 |
| -6E-08  | -2E-05                                    | 0.00052 | -0.0019 | -0.0003 |
| -3E-08  | 0.0004                                    | -0.0007 | -0.0019 | -0.0002 |
| -5E-10  | -0.0021                                   | -0.0041 | -0.0065 | -0.0059 |
| 3.2E-08 | -0.0081                                   | -0.0103 | -0.0147 | -0.0168 |
| 6.4E-08 | 0.02674                                   | 0.02169 | 0.02069 | 0.02101 |
| 9.6E-08 | 0.0281                                    | 0.02533 | 0.02272 | 0.02355 |
| 1.3E-07 | 0.02698                                   | 0.02433 | 0.02156 | 0.02251 |
| 1.6E-07 | 0.02533                                   | 0.02298 | 0.02028 | 0.02105 |
| 1.9E-07 | 0.02347                                   | 0.02236 | 0.01844 | 0.01874 |
| 2.2E-07 | 0.02383                                   | 0.02144 | 0.01836 | 0.01767 |
| 2.6E-07 | 0.02286                                   | 0.01949 | 0.01719 | 0.01606 |
| 2.9E-07 | 0.02117                                   | 0.01822 | 0.01565 | 0.01515 |
| 3.2E-07 | 0.02093                                   | 0.01648 | 0.01447 | 0.0137  |
| 3.5E-07 | 0.01928                                   | 0.0174  | 0.01418 | 0.01236 |
| 3.8E-07 | 0.01909                                   | 0.01573 | 0.01278 | 0.01037 |
| 4.2E-07 | 0.01701                                   | 0.01572 | 0.01245 | 0.01162 |
| 4.5E-07 | 0.01721                                   | 0.01422 | 0.01188 | 0.01021 |
| 4.8E-07 | 0.01623                                   | 0.0132  | 0.01011 | 0.01061 |
| 5.1E-07 | 0.01664                                   | 0.01305 | 0.00954 | 0.00967 |
| 5.4E-07 | 0.01456                                   | 0.0122  | 0.00878 | 0.00847 |

|         |         |         |         |         |
|---------|---------|---------|---------|---------|
| 5.8E-07 | 0.01433 | 0.01104 | 0.00872 | 0.0071  |
| 6.1E-07 | 0.01475 | 0.01052 | 0.00891 | 0.00705 |
| 6.4E-07 | 0.01364 | 0.00983 | 0.00775 | 0.00641 |
| 6.7E-07 | 0.01318 | 0.01082 | 0.00794 | 0.00613 |
| 7E-07   | 0.01301 | 0.00964 | 0.00676 | 0.00579 |
| 7.4E-07 | 0.01169 | 0.00897 | 0.00665 | 0.00485 |
| 7.7E-07 | 0.01191 | 0.009   | 0.00688 | 0.0049  |
| 8E-07   | 0.01139 | 0.0081  | 0.00603 | 0.00422 |
| 8.3E-07 | 0.01069 | 0.00705 | 0.00473 | 0.00423 |
| 8.6E-07 | 0.00978 | 0.00695 | 0.00495 | 0.00406 |
| 9E-07   | 0.00958 | 0.00729 | 0.0041  | 0.00367 |
| 9.3E-07 | 0.00979 | 0.00724 | 0.00365 | 0.00348 |
| 9.6E-07 | 0.00908 | 0.00547 | 0.00473 | 0.00288 |
| 9.9E-07 | 0.00876 | 0.00589 | 0.00391 | 0.00268 |
| 1E-06   | 0.00847 | 0.00575 | 0.00316 | 0.00318 |
| 1.1E-06 | 0.00809 | 0.00492 | 0.00334 | 0.00323 |
| 1.1E-06 | 0.00784 | 0.00534 | 0.00262 | 0.00345 |
| 1.1E-06 | 0.00769 | 0.00527 | 0.00301 | 0.00315 |
| 1.2E-06 | 0.00684 | 0.00498 | 0.00229 | 0.00206 |
| 1.2E-06 | 0.00644 | 0.00489 | 0.00278 | 0.00263 |
| 1.2E-06 | 0.0075  | 0.00435 | 0.00168 | 0.00205 |
| 1.2E-06 | 0.00641 | 0.00402 | 0.00202 | 0.00197 |
| 1.3E-06 | 0.00662 | 0.00361 | 0.00239 | 0.0014  |
| 1.3E-06 | 0.00631 | 0.00378 | 0.00192 | 0.00202 |
| 1.3E-06 | 0.00559 | 0.00403 | 0.0022  | 0.00139 |
| 1.4E-06 | 0.0053  | 0.00339 | 0.00146 | 0.00135 |
| 1.4E-06 | 0.00525 | 0.00313 | 0.00131 | 0.00151 |
| 1.4E-06 | 0.00554 | 0.00376 | 0.00118 | 0.0013  |
| 1.5E-06 | 0.00549 | 0.00342 | 0.00161 | 0.00223 |
| 1.5E-06 | 0.00458 | 0.00338 | 0.001   | 0.0011  |
| 1.5E-06 | 0.00489 | 0.0032  | 0.00111 | 0.00233 |
| 1.6E-06 | 0.00526 | 0.00287 | 0.00098 | 0.00145 |
| 1.6E-06 | 0.00395 | 0.00262 | 0.0008  | 0.0014  |
| 1.6E-06 | 0.0041  | 0.00223 | 0.00036 | 0.00059 |
| 1.7E-06 | 0.00445 | 0.00201 | 0.00132 | 0.00166 |
| 1.7E-06 | 0.00433 | 0.00238 | 0.00125 | 0.00123 |
| 1.7E-06 | 0.0038  | 0.00192 | 0.00068 | 0.00043 |
| 1.8E-06 | 0.00328 | 0.00203 | 0.00043 | 0.00048 |
| 1.8E-06 | 0.00346 | 0.00256 | 5.7E-05 | 0.00048 |
| 1.8E-06 | 0.00416 | 0.00186 | 0.00053 | 0.00081 |
| 1.9E-06 | 0.0032  | 0.00139 | 0.00041 | 0.00026 |
| 1.9E-06 | 0.00408 | 0.00228 | -0.0003 | 0.00063 |
| 1.9E-06 | 0.00317 | 0.00124 | -0.0001 | 0.00033 |
| 2E-06   | 0.00318 | 0.00156 | -0.0008 | 0.00038 |
| 2E-06   | 0.00281 | 0.00202 | 0.00048 | 0.00045 |
| 2E-06   | 0.00312 | 0.00217 | -0.0002 | 0.00125 |
| 2E-06   | 0.00312 | 0.00215 | 0.00022 | 0.00071 |
| 2.1E-06 | 0.00286 | 0.00301 | 6.5E-06 | -0.0001 |
| 2.1E-06 | 0.00331 | 0.00179 | -0.0009 | 0.00076 |
| 2.1E-06 | 0.00172 | 0.00171 | -0.0009 | 0.0006  |
| 2.2E-06 | 0.00216 | 0.0014  | -0.0008 | 0.00043 |
| 2.2E-06 | 0.00246 | 0.00123 | -0.0002 | -0.0003 |
| 2.2E-06 | 0.0028  | 0.00124 | -2E-05  | 0.00043 |
| 2.3E-06 | 0.00259 | 0.00162 | -0.0012 | 8.6E-05 |

|         |         |         |         |         |
|---------|---------|---------|---------|---------|
| 2.3E-06 | 0.00329 | 0.00071 | -0.0002 | 0.00064 |
| 2.3E-06 | 0.00206 | 0.0008  | -0.0005 | 0.00021 |
| 2.4E-06 | 0.00226 | 8.9E-05 | -0.0002 | 0.00132 |
| 2.4E-06 | 0.00259 | 0.00026 | -0.0009 | 9.4E-05 |
| 2.4E-06 | 0.00287 | 0.00085 | -0.0007 | -0.0003 |
| 2.5E-06 | 0.00206 | 0.00115 | 3E-05   | 0.0005  |
| 2.5E-06 | 0.00232 | 0.00125 | -3E-05  | 0.00058 |
| 2.5E-06 | 0.00184 | 0.00051 | 0.00015 | 0.00053 |
| 2.6E-06 | 0.00261 | 0.00091 | -0.0008 | 0.00044 |
| 2.6E-06 | 0.00239 | 0.00092 | -0.0007 | 0.00062 |
| 2.6E-06 | 0.00182 | 0.00089 | -0.0004 | 0.00042 |
| 2.7E-06 | 0.00191 | 0.00049 | -0.0005 | 0.00033 |
| 2.7E-06 | 0.00216 | 0.00086 | 0.00011 | 0.00038 |
| 2.7E-06 | 0.00228 | 0.00054 | -0.0005 | 0.00102 |
| 2.8E-06 | 0.00198 | 0.00054 | -0.0005 | 0.00073 |
| 2.8E-06 | 0.00106 | 0.00104 | -0.0006 | 5.4E-05 |
| 2.8E-06 | 0.00221 | 0.00064 | 5.4E-05 | 0.00076 |
| 2.8E-06 | 0.00139 | 0.00142 | -0.001  | 0.00073 |
| 2.9E-06 | 0.00161 | 0.00086 | -0.0011 | 0.00049 |
| 2.9E-06 | 0.00129 | 0.00039 | -0.0006 | 0.00123 |
| 2.9E-06 | 0.00131 | 0.00048 | -0.0009 | -0.0005 |
| 3E-06   | 0.00134 | 0.00025 | -0.0006 | 0.00044 |
| 3E-06   | 0.0013  | 0.00144 | -0.0009 | 0.00088 |
| 3E-06   | 0.00128 | 0.00123 | -0.0009 | 0.00123 |
| 3.1E-06 | 0.00191 | 0.00049 | -0.0008 | 0.00014 |
| 3.1E-06 | 0.00115 | 0.00102 | -0.0004 | 1.3E-05 |
| 3.1E-06 | 0.00178 | 0.00096 | -0.0012 | 0.00056 |
| 3.2E-06 | 0.00208 | 0.00108 | -0.0013 | 0.00089 |
| 3.2E-06 | 0.00153 | 3E-05   | -0.0007 | 0.00031 |
| 3.2E-06 | 0.00187 | 0.00061 | -0.0002 | 0.0009  |
| 3.3E-06 | 0.00191 | 0.00092 | -0.0006 | -0.0002 |
| 3.3E-06 | 0.00184 | -0.0004 | -0.0014 | 0.00024 |
| 3.3E-06 | 0.00188 | 0.0009  | -0.0006 | 0.00039 |
| 3.4E-06 | 0.00128 | 0.00087 | -0.0013 | 0.00042 |
| 3.4E-06 | 0.00133 | 0.00016 | -0.001  | 0.00038 |
| 3.4E-06 | 0.0018  | 0.00102 | -0.0003 | 0.00055 |
| 3.5E-06 | 0.00182 | 0.00049 | -0.0009 | 0.00048 |
| 3.5E-06 | 0.00247 | 0.00028 | -0.0008 | 0.00077 |
| 3.5E-06 | 0.00132 | 0.00044 | -0.0007 | 0.00045 |
| 3.6E-06 | 0.00133 | 0.00045 | -0.0006 | 0.00035 |
| 3.6E-06 | 0.00077 | 0.00088 | -0.0009 | 0.00069 |
| 3.6E-06 | 0.0013  | 0.00082 | -0.0008 | 0.00064 |
| 3.6E-06 | 0.00085 | 0.00074 | -0.0003 | -6E-05  |
| 3.7E-06 | 0.00066 | 0.00029 | -0.0011 | 8.6E-05 |
| 3.7E-06 | 0.00102 | 0.00058 | -0.002  | 0.0008  |
| 3.7E-06 | 0.00138 | 0.00062 | -0.0008 | 0.00115 |
| 3.8E-06 | 0.00097 | 0.00075 | -0.0001 | 0.00103 |
| 3.8E-06 | 0.00066 | 0.00087 | -0.0014 | 0.00015 |
| 3.8E-06 | 0.0006  | 0.00044 | -0.0005 | 0.00034 |
| 3.9E-06 | 0.00037 | 0.00081 | -0.0005 | 0.00039 |
| 3.9E-06 | 0.00077 | 0.00098 | -0.0015 | 1.9E-05 |
| 3.9E-06 | 0.00138 | 0.00083 | -0.0009 | 0.00069 |
| 4E-06   | 0.0006  | 0.00072 | -0.0015 | 0.00035 |
| 4E-06   | 0.00179 | 0.00049 | -0.0015 | 0.00044 |

|         |         |         |         |         |
|---------|---------|---------|---------|---------|
| 4E-06   | 0.00054 | 0.00094 | -0.0013 | 0.0009  |
| 4.1E-06 | 0.00129 | 0.00094 | -0.0017 | 0.00014 |
| 4.1E-06 | 0.00156 | 0.00036 | -0.001  | 0.00035 |
| 4.1E-06 | 0.00095 | 0.00041 | -0.001  | 0.00047 |
| 4.2E-06 | 0.0008  | 0.0011  | -0.0009 | 0.0006  |
| 4.2E-06 | 0.00042 | 0.00061 | -0.0009 | 0.00023 |
| 4.2E-06 | 0.00066 | 0.00017 | -0.0007 | 7.6E-05 |
| 4.3E-06 | 0.00051 | 0.00084 | -0.0016 | 2E-05   |
| 4.3E-06 | 0.00025 | 0.00178 | -0.0006 | 9.6E-06 |
| 4.3E-06 | 0.00094 | 0.00085 | -0.0011 | -0.0001 |
| 4.4E-06 | 0.00021 | 0.0009  | -0.0007 | 0.0005  |
| 4.4E-06 | 0.00044 | 0.00067 | -0.0008 | 0.00067 |
| 4.4E-06 | 0.00068 | 0.00085 | -0.0007 | 0.00048 |
| 4.4E-06 | 0.00048 | 0.0007  | -0.0009 | 6.5E-05 |
| 4.5E-06 | 0.00044 | 0.00046 | -0.001  | 0.00069 |
| 4.5E-06 | 0.00118 | 0.00075 | -0.0012 | -4E-05  |
| 4.5E-06 | 0.00077 | 0.00105 | -0.0011 | -8E-05  |
| 4.6E-06 | 0.00145 | 0.00047 | -0.0013 | 0.00016 |
| 4.6E-06 | 0.00117 | 0.00055 | -0.0014 | -4E-05  |
| 4.6E-06 | -0.0003 | 0.00119 | -0.0012 | 0.00062 |
| 4.7E-06 | 0.00074 | 0.00046 | -0.001  | -0.0005 |
| 4.7E-06 | 0.00097 | 0.0016  | -0.002  | 0.00018 |
| 4.7E-06 | 0.00118 | 3.4E-05 | -0.0005 | -0.0006 |
| 4.8E-06 | 0.00037 | 0.00084 | -0.0001 | 0.00011 |
| 4.8E-06 | 0.00092 | 0.00059 | -0.0011 | 3.7E-05 |
| 4.8E-06 | 0.00029 | 0.0012  | -0.0007 | 0.00025 |
| 4.9E-06 | 0.00088 | -2E-05  | -0.0013 | 0.00022 |
| 4.9E-06 | 0.00101 | 0.00063 | -0.0015 | 0.00047 |
| 4.9E-06 | 0.00038 | 0.00149 | -0.0006 | -0.0003 |
| 5E-06   | 0.00126 | 0.0009  | -0.0014 | 0.00036 |
| 5E-06   | 0.00121 | 0.00068 | -0.0007 | 1.5E-05 |
| 5E-06   | -5E-05  | -0.0001 | -0.0014 | 0.00011 |
| 5.1E-06 | 0.00016 | 0.00066 | -0.0011 | -0.0005 |
| 5.1E-06 | 0.00112 | 0.00013 | -0.0006 | -0.0002 |
| 5.1E-06 | 0.00105 | 0.00027 | -0.0007 | 0.00025 |
| 5.2E-06 | 0.00062 | 0.00064 | -0.0014 | 0.00022 |
| 5.2E-06 | 0.00084 | 0.00039 | -0.0017 | -6E-05  |
| 5.2E-06 | 0.00111 | 0.0004  | -0.0002 | 0.00078 |
| 5.2E-06 | 0.00065 | 0.00061 | -0.0018 | 0.0002  |
| 5.3E-06 | 0.00045 | -3E-05  | -0.0016 | 0.0002  |
| 5.3E-06 | 0.0009  | 0.00073 | -0.0015 | -0.0002 |
| 5.3E-06 | 0.00094 | 0.00061 | -0.0006 | -0.0006 |
| 5.4E-06 | 0.00059 | 0.00129 | -0.001  | -0.0004 |
| 5.4E-06 | 0.00108 | 0.0011  | -0.0009 | 0.00081 |
| 5.4E-06 | 0.00142 | 0.0006  | -0.0016 | 0.00011 |
| 5.5E-06 | 0.00078 | 0.00126 | -0.0007 | -0.0004 |
| 5.5E-06 | 0.00043 | 0.00085 | -0.0009 | 0.00033 |
| 5.5E-06 | 0.00046 | 0.00046 | -0.0013 | 0.00095 |
| 5.6E-06 | 0.00136 | 0.00075 | -0.001  | 0.00127 |
| 5.6E-06 | 0.00143 | 0.00036 | -0.0007 | 5.2E-05 |
| 5.6E-06 | 0.00138 | 0.00018 | -0.0016 | 0.0006  |
| 5.7E-06 | 0.00128 | 0.00018 | -0.002  | -0.0002 |
| 5.7E-06 | 0.00111 | 0.00022 | -0.0007 | -0.0002 |
| 5.7E-06 | -0.0002 | 0.0007  | -0.0008 | -0.0001 |

|         |         |         |         |         |
|---------|---------|---------|---------|---------|
| 5.8E-06 | 0.00075 | 0.001   | -0.0015 | 0.00026 |
| 5.8E-06 | 0.00155 | 0.00072 | -0.001  | 0.00032 |
| 5.8E-06 | 0.00016 | 0.001   | -0.0018 | 0.00038 |
| 5.9E-06 | 0.00142 | 0.00122 | -0.001  | 0.00064 |
| 5.9E-06 | 0.00064 | 0.00047 | -0.0014 | -0.0002 |
| 5.9E-06 | 0.0007  | 0.00013 | -0.001  | 0.00065 |
| 6E-06   | 0.00072 | 0.00071 | -0.001  | 0.00075 |
| 6E-06   | 0.00132 | 0.00088 | -0.002  | 0.00058 |
| 6E-06   | 0.00115 | 0.00088 | -0.0011 | 0.0005  |
| 6E-06   | 0.0011  | 0.00068 | -0.0005 | 0.00077 |
| 6.1E-06 | 0.0009  | 0.00084 | -0.0009 | 0.0005  |
| 6.1E-06 | 0.00025 | 0.00034 | -0.0007 | 0.00116 |
| 6.1E-06 | 0.00113 | 0.00014 | -0.0006 | 0.00109 |
| 6.2E-06 | 0.00084 | 0.00039 | -0.0016 | -2E-05  |
| 6.2E-06 | -2E-06  | 0.00126 | -0.0014 | -0.0003 |
| 6.2E-06 | 3.4E-05 | 0.00049 | -0.0011 | 0.00087 |
| 6.3E-06 | 0.00051 | 0.00091 | -0.0016 | 0.00126 |
| 6.3E-06 | 0.00154 | 0.00024 | -0.0009 | 0.00046 |
| 6.3E-06 | 0.0007  | 0.001   | -0.0007 | 0.0007  |
| 6.4E-06 | 0.00104 | 0.00122 | -0.0012 | 6.7E-05 |
| 6.4E-06 | 0.0016  | 0.00034 | -0.0002 | 0.00024 |
| 6.4E-06 | 0.00148 | 0.00078 | -0.0008 | 0.00065 |
| 6.5E-06 | 0.00111 | 0.00091 | -0.0015 | 0.00013 |
| 6.5E-06 | 7E-05   | 0.0003  | -0.001  | 0.00056 |
| 6.5E-06 | 0.00061 | 0.00073 | -0.0013 | 0.00128 |
| 6.6E-06 | 0.00068 | 0.0004  | -0.0006 | 0.00093 |
| 6.6E-06 | 0.00067 | 0.00028 | -0.0005 | -0.0005 |
| 6.6E-06 | 0.00097 | 0.00083 | -0.0009 | -0.0002 |
| 6.7E-06 | 0.00053 | 0.00064 | -0.0002 | -3E-05  |
| 6.7E-06 | 0.00086 | 0.00069 | -0.001  | 0.00018 |
| 6.7E-06 | 0.00025 | 0.00038 | -0.0011 | 0.00038 |
| 6.8E-06 | 0.00083 | -3E-05  | -0.0013 | 0.00015 |
| 6.8E-06 | 0.00091 | -2E-05  | -0.0003 | 0.00043 |
| 6.8E-06 | 0.00085 | 0.00097 | -0.0009 | -6E-05  |
| 6.8E-06 | 0.0009  | 0.00104 | -0.0008 | -2E-05  |
| 6.9E-06 | 0.00042 | 0.00057 | -0.0012 | -0.0004 |
| 6.9E-06 | 0.00113 | 0.00022 | -0.0005 | 0.00023 |
| 6.9E-06 | -1E-04  | 0.00069 | -0.0013 | -8E-05  |
| 7E-06   | 0.0007  | 0.00134 | -0.0012 | 0.0002  |
| 7E-06   | 0.00159 | 0.00047 | -0.002  | 0.00095 |
| 7E-06   | 9.5E-05 | 0.0002  | -0.0015 | -0.0004 |
| 7.1E-06 | 0.00052 | 0.00017 | -0.0011 | 0.00037 |
| 7.1E-06 | 0.00081 | 0.00029 | -0.0017 | -0.0002 |
| 7.1E-06 | 0.00074 | -1E-05  | -0.001  | -0.0003 |
| 7.2E-06 | 0.00072 | 0.00046 | -0.0012 | -0.0004 |
| 7.2E-06 | 0.00087 | 0.00055 | -0.0013 | 0.00055 |
| 7.2E-06 | 0.00057 | 0.00042 | -0.0009 | 0.00051 |
| 7.3E-06 | 0.00049 | 0.00076 | -0.0011 | 0.00102 |
| 7.3E-06 | 0.00018 | 0.00035 | -0.0008 | -0.0003 |
| 7.3E-06 | 0.00069 | 0.00073 | -0.0018 | 0.00033 |
| 7.4E-06 | 0.00067 | 0.00081 | -0.001  | -0.0003 |
| 7.4E-06 | -0.0002 | 0.0002  | -0.0011 | 0.00029 |
| 7.4E-06 | 0.00114 | 0.0001  | -0.0017 | -0.0006 |
| 7.5E-06 | 0.00099 | 0.00117 | -0.0014 | -0.0006 |

|         |         |         |         |         |
|---------|---------|---------|---------|---------|
| 7.5E-06 | 0.0008  | 0.0011  | -0.0015 | -0.0007 |
| 7.5E-06 | 6.9E-05 | 0.0009  | -0.0011 | 0.0006  |
| 7.6E-06 | 0.00135 | 0.00108 | -0.0005 | 0.0002  |
| 7.6E-06 | 0.00057 | 0.00064 | -0.0015 | -0.0005 |
| 7.6E-06 | 0.00074 | 0.00014 | -0.0009 | -0.0008 |
| 7.6E-06 | 0.00059 | -7E-05  | 0.00011 | 0.00043 |
| 7.7E-06 | -0.0004 | 0.00034 | -0.0001 | 0.00031 |
| 7.7E-06 | 0.00055 | 0.00029 | -0.0009 | -0.0001 |
| 7.7E-06 | 0.00062 | 0.0008  | -0.0004 | -3E-05  |
| 7.8E-06 | -5E-05  | 0.00065 | -0.0008 | -0.0005 |
| 7.8E-06 | 0.00057 | 0.00045 | -0.0017 | -0.0007 |
| 7.8E-06 | 0.00039 | 6.6E-05 | -0.0016 | -0.0002 |
| 7.9E-06 | 0.00078 | 0.00042 | -0.001  | 0.00026 |
| 7.9E-06 | 0.00043 | 0.00101 | -0.0007 | -0.0002 |
| 7.9E-06 | -7E-05  | 0.00115 | -0.0016 | 0.00033 |
| 8E-06   | -9E-05  | 0.00049 | -0.0011 | -0.0004 |
| 8E-06   | 0.00022 | 0.00065 | -0.0007 | 6.8E-05 |
| 8E-06   | 0.0006  | 0.00027 | -0.0012 | -0.0001 |
| 8.1E-06 | 0.00074 | -7E-05  | -0.0008 | 0.00021 |
| 8.1E-06 | 0.00032 | 0.0002  | -0.0002 | 0.00048 |
| 8.1E-06 | 0.00059 | 0.00065 | -0.0016 | 0.00049 |
| 8.2E-06 | 0.00049 | 0.00061 | -0.0007 | 0.00014 |
| 8.2E-06 | 0.00098 | 0.0003  | -0.0009 | 0.00018 |
| 8.2E-06 | -3E-06  | 0.0014  | -0.0008 | 0.00019 |
| 8.3E-06 | 0.00117 | -0.0002 | -0.0015 | 0.00043 |
| 8.3E-06 | 0.00087 | 0.00038 | -0.0016 | 0.0003  |
| 8.3E-06 | 0.00038 | 0.00052 | -0.0011 | 0.0001  |
| 8.4E-06 | 0.00023 | -0.0002 | -0.0009 | 0.00048 |
| 8.4E-06 | 0.00099 | 0.00071 | -0.0019 | 0.00048 |
| 8.4E-06 | 0.00092 | 0.00106 | -0.002  | 0.00026 |
| 8.4E-06 | 0.00081 | 0.00161 | -0.001  | -0.0009 |
| 8.5E-06 | 0.00129 | 0.00135 | -0.0015 | 0.00048 |
| 8.5E-06 | 0.00028 | 0.00077 | -0.001  | -0.0001 |
| 8.5E-06 | 0.00096 | 0.00097 | -0.0017 | -0.0004 |
| 8.6E-06 | 0.00117 | 0.00131 | -0.0016 | -0.0008 |
| 8.6E-06 | 0.00081 | 0.00067 | -0.0011 | -0.0003 |
| 8.6E-06 | 0.00083 | 0.0003  | -0.0009 | 3E-05   |
| 8.7E-06 | 0.00049 | 0.00088 | -0.0015 | -0.0002 |
| 8.7E-06 | 0.00123 | 0.00043 | -0.0012 | 0.00042 |
| 8.7E-06 | -0.0003 | 0.00158 | -0.0008 | 7.4E-05 |
| 8.8E-06 | -4E-05  | 0.00085 | -0.0007 | -0.0006 |
| 8.8E-06 | 0.00045 | 0.00084 | -0.0009 | -0.0003 |
| 8.8E-06 | 0.00073 | 0.00062 | -0.0013 | 0.00038 |
| 8.9E-06 | 0.00026 | 0.0004  | -0.001  | -0.0005 |
| 8.9E-06 | 0.00051 | -0.0002 | -0.0006 | 7.1E-05 |
| 8.9E-06 | 0.0008  | 0.00055 | -0.0017 | 0.00027 |
| 9E-06   | 0.00068 | 0.00092 | -0.001  | -9E-06  |
| 9E-06   | 0.00111 | 7.1E-05 | -0.0008 | 0.00021 |
| 9E-06   | 0.00112 | 0.00076 | -0.0004 | 0.00016 |
| 9.1E-06 | 0.00127 | 0.00128 | -0.001  | -9E-05  |
| 9.1E-06 | 0.00063 | 0.00063 | -0.0013 | 0.00093 |
| 9.1E-06 | 0.00062 | 0.00075 | -0.0008 | 0.00129 |
| 9.2E-06 | 0.00034 | 5.6E-05 | -0.001  | 0.00011 |
| 9.2E-06 | 1.8E-05 | 0.00012 | -0.0009 | 4.9E-05 |

|         |         |         |         |         |
|---------|---------|---------|---------|---------|
| 9.2E-06 | 0.00082 | 0.00088 | -0.0007 | -0.0007 |
| 9.2E-06 | 0.00093 | 8.3E-05 | -0.0015 | 0.00026 |
| 9.3E-06 | 0.00134 | 0.00083 | -0.0002 | -0.0003 |
| 9.3E-06 | 0.00076 | 0.00142 | -0.0008 | -0.0001 |
| 9.3E-06 | 0.00068 | 0.00123 | -0.0006 | 0.00021 |
| 9.4E-06 | 0.00045 | 0.00101 | -0.0009 | 3.4E-05 |
| 9.4E-06 | 0.00042 | 0.00184 | -0.0026 | 0.00094 |
| 9.4E-06 | 0.00101 | 0.00083 | -0.0006 | 0.00013 |
| 9.5E-06 | 0.00053 | 0.00051 | -0.0008 | 0.00032 |
| 9.5E-06 | 0.00079 | 0.00077 | -0.0004 | 0.00033 |
| 9.5E-06 | 2.1E-05 | 0.00015 | -0.0016 | 3.6E-05 |
| 9.6E-06 | 0.00013 | 0.00027 | -0.0014 | 8E-05   |
| 9.6E-06 | 0.00033 | 0.00036 | -0.0014 | 0.00016 |
| 9.6E-06 | 0.00061 | 0.00113 | -0.001  | -7E-05  |
| 9.7E-06 | 0.00043 | 0.00061 | -0.0007 | -1E-05  |
| 9.7E-06 | 0.00044 | 0.00013 | -0.0019 | -0.0008 |
| 9.7E-06 | 0.00011 | 0.00082 | -0.001  | -0.0009 |
| 9.8E-06 | 0.00092 | 0.00091 | -0.001  | -0.0004 |
| 9.8E-06 | 0.00086 | 0.00091 | -0.0022 | -0.0007 |
| 9.8E-06 | 0.00145 | 0.00095 | -0.0019 | 0.00011 |
| 9.9E-06 | 0.00096 | 0.0005  | -0.0005 | 0.00076 |
| 9.9E-06 | 0.0006  | 0.0002  | -0.0014 | -5E-05  |
| 9.9E-06 | 0.00126 | 0.00072 | -0.0008 | 0.00028 |
| 1E-05   | 0.001   | 0.00151 | -0.0009 | -0.0004 |
| 1E-05   | 0.00056 | 0.00031 | -0.0011 | -0.0002 |
| 1E-05   | 0.00053 | 0.00083 | -0.0013 | -0.0005 |
| 1E-05   | 1.8E-05 | -0.0002 | -0.0006 | -0.0008 |
| 1E-05   | 0.00036 | -0.0001 | -0.001  | -0.0009 |
| 1E-05   | 0.0008  | 0.00066 | -0.0008 | 0.00028 |
| 1E-05   | 0.00077 | 0.00049 | -0.0002 | 7E-05   |
| 1E-05   | 8.2E-05 | 0.00104 | -0.0009 | -0.0004 |
| 1E-05   | 0.00082 | -0.0001 | -0.0017 | -2E-05  |
| 1E-05   | 0.00027 | 0.00055 | -0.0013 | 6.2E-05 |
| 1E-05   | 0.00103 | 0.0008  | -0.0013 | -0.0003 |
| 1E-05   | 0.00041 | -1E-04  | -0.0008 | 0.00021 |
| 1E-05   | 0.00065 | -0.0002 | -0.0013 | 0.00016 |
| 1E-05   | 0.00079 | -0.0005 | -0.0008 | -0.0003 |
| 1E-05   | 0.00069 | 0.00042 | -0.0009 | -0.0005 |
| 1E-05   | 0.00047 | 0.00062 | -0.0013 | -0.0003 |
| 1E-05   | 0.00115 | 0.00015 | -0.0009 | -0.0007 |
| 1.1E-05 | 0.0003  | 0.00035 | -0.0005 | -0.0006 |
| 1.1E-05 | 0.00103 | 0.0002  | -0.0008 | 0.00044 |
| 1.1E-05 | 0.00105 | 0.00043 | -0.0014 | 0.00023 |
| 1.1E-05 | 0.00068 | 0.0004  | -0.0008 | 0.00071 |
| 1.1E-05 | 0.00088 | 0.00011 | -0.0012 | 0.00011 |
| 1.1E-05 | 0.00019 | 0.00124 | -0.0008 | -0.0007 |
| 1.1E-05 | 0.00065 | 0.00055 | -0.0012 | 3E-05   |
| 1.1E-05 | 0.00029 | -0.0005 | -0.0013 | -0.0004 |
| 1.1E-05 | -0.0002 | -0.0002 | -0.0009 | -0.0004 |
| 1.1E-05 | 0.00062 | 0.00034 | -0.0009 | -8E-05  |
| 1.1E-05 | 0.00039 | 0.00054 | -0.0004 | 0.0003  |
| 1.1E-05 | 0.00061 | -0.0006 | -0.0015 | -0.0003 |
| 1.1E-05 | 0.00025 | 8.9E-05 | -0.0006 | -0.0007 |
| 1.1E-05 | 0.00108 | -0.0001 | -0.0009 | -0.0006 |



|         |         |         |         |         |
|---------|---------|---------|---------|---------|
| 1.1E-05 | 0.00065 | 0.00027 | -0.0008 | -0.0004 |
| 1.1E-05 | 0.00064 | 0.00055 | -0.0014 | -0.0006 |
| 1.1E-05 | 0.00084 | 0.00044 | -0.0011 | -8E-05  |
| 1.1E-05 | 0.00037 | -0.0006 | -0.001  | -0.0003 |
| 1.1E-05 | 0.00055 | 0.00071 | 0.00015 | -0.0007 |
| 1.1E-05 | 0.00073 | 0.00041 | -0.0011 | 8.6E-05 |
| 1.1E-05 | 0.0007  | 0.00023 | -0.001  | 0.00063 |
| 1.1E-05 | 0.00031 | 0.00033 | -0.0008 | 5.6E-05 |
| 1.1E-05 | 0.00095 | 0.00066 | -0.0011 | -0.0007 |
| 1.1E-05 | 0.00027 | 0.00091 | -0.0011 | 0.00045 |
| 1.1E-05 | 0.00079 | 0.00029 | -0.0006 | -0.0003 |
| 1.1E-05 | 0.00081 | 0.00092 | -0.0013 | -0.0001 |
| 1.1E-05 | -2E-05  | 0.00103 | -0.0013 | -0.0003 |
| 1.1E-05 | -0.0002 | 0.00089 | -0.0006 | -0.0002 |
| 1.1E-05 | -0.0003 | 0.00053 | -0.0015 | -0.0003 |
| 1.1E-05 | 3.9E-05 | 8E-05   | -0.0008 | 0.00024 |
| 1.1E-05 | 0.00066 | 0.00035 | -0.0008 | 0.0003  |
| 1.1E-05 | 0.00033 | 0.00044 | -0.0014 | 0.00023 |
| 1.2E-05 | 0.00082 | 0.00033 | -0.0004 | 6.6E-05 |
| 1.2E-05 | 0.00064 | 0.00072 | -0.0007 | 0.00066 |
| 1.2E-05 | -0.0002 | 0.00025 | -0.0015 | 0.0007  |
| 1.2E-05 | 7.7E-05 | 0.00027 | -0.0013 | -0.0007 |
| 1.2E-05 | 0.00123 | 0.00035 | -7E-05  | 0.00036 |
| 1.2E-05 | 0.00121 | 0.00018 | -0.0016 | -0.0004 |
| 1.2E-05 | 0.00114 | 0.00073 | -0.0016 | -0.0003 |
| 1.2E-05 | 6.5E-05 | 0.00085 | -0.0004 | 0.00018 |
| 1.2E-05 | 0.00107 | 0.00065 | -0.0011 | 0.00031 |
| 1.2E-05 | 0.00098 | -5E-05  | -0.001  | 0.00015 |
| 1.2E-05 | 0.00127 | -0.0002 | -0.0012 | -0.0004 |
| 1.2E-05 | 0.0002  | -0.0002 | -0.0016 | 0.0003  |
| 1.2E-05 | 0.00033 | 0.00025 | -0.001  | 0.00017 |
| 1.2E-05 | -0.0003 | 0.00031 | -0.0006 | -0.0007 |
| 1.2E-05 | 0.00039 | 0.0013  | -0.0009 | -0.0005 |
| 1.2E-05 | 0.00021 | 0.00031 | -0.0012 | 0.00035 |
| 1.2E-05 | 0.00023 | 0.00029 | -0.0014 | -0.001  |
| 1.2E-05 | -0.0004 | 0.00029 | -0.0012 | 1.9E-05 |
| 1.2E-05 | 0.00098 | 0.00052 | -0.0016 | -0.0001 |
| 1.2E-05 | 0.00034 | 0.00033 | -0.001  | -0.0007 |
| 1.2E-05 | 0.00065 | 0.00067 | -0.0014 | -0.0005 |
| 1.2E-05 | 0.00083 | 0.00086 | -0.0008 | -0.0008 |
| 1.2E-05 | 0.00052 | 0.00021 | -0.0003 | 0.00037 |
| 1.2E-05 | 0.00012 | 0.00045 | -0.0014 | 4.4E-05 |
| 1.2E-05 | 0.00059 | 0.00099 | -0.0011 | 6.3E-05 |
| 1.2E-05 | 0.00019 | 0.00049 | -0.0007 | -0.0006 |
| 1.2E-05 | 0.00026 | 0.0002  | -0.0017 | 0.00103 |
| 1.2E-05 | 0.00036 | 0.00057 | -0.0018 | -0.0006 |
| 1.2E-05 | 0.00057 | 0.00066 | -0.0014 | -0.0002 |
| 1.2E-05 | 0.00049 | 0.00133 | 4.1E-05 | 0.00032 |
| 1.2E-05 | 0.00119 | 0.00075 | -0.0012 | -0.0004 |
| 1.3E-05 | -0.0001 | 0.00035 | -0.0009 | -0.0002 |
| 1.3E-05 | -4E-05  | 0.00031 | -0.0013 | 0.00041 |
| 1.3E-05 | 0.00051 | 0.00094 | -0.001  | 0.00042 |
| 1.3E-05 | 0.00017 | 0.00076 | -0.0006 | -0.001  |
| 1.3E-05 | 0.00051 | 0.00039 | -0.0015 | -0.0006 |

|         |         |         |         |         |
|---------|---------|---------|---------|---------|
| 1.3E-05 | 0.00027 | 0.0009  | -0.0007 | 0.00038 |
| 1.3E-05 | 0.00128 | -2E-07  | -0.0012 | -1E-04  |
| 1.3E-05 | 0.00045 | 0.00081 | -0.001  | -0.0003 |
| 1.3E-05 | 0.00082 | 0.00052 | -0.0009 | 0.00014 |
| 1.3E-05 | 0.00041 | 0.00055 | -0.0007 | -0.0002 |
| 1.3E-05 | 0.00032 | 0.0007  | -0.0005 | -0.0008 |
| 1.3E-05 | 3.7E-05 | -0.0003 | -0.0011 | -0.0008 |
| 1.3E-05 | 0.00017 | 0.00032 | -0.0005 | -0.0002 |
| 1.3E-05 | 0.00111 | 0.001   | -0.0011 | -0.0011 |
| 1.3E-05 | 2.1E-05 | -0.0003 | -0.0019 | -0.0006 |
| 1.3E-05 | 0.00037 | 0.00092 | -0.0013 | 0.00017 |
| 1.3E-05 | 0.00105 | 0.00057 | -0.0018 | 0.00028 |
| 1.3E-05 | 0.00082 | 0.0004  | -0.0013 | -0.0004 |
| 1.3E-05 | 0.00073 | -0.0003 | -0.0008 | 0.00051 |
| 1.3E-05 | 0.00056 | -5E-07  | -0.0015 | 4.3E-05 |
| 1.3E-05 | 0.00101 | 0.00017 | -0.0013 | -0.0005 |
| 1.3E-05 | 0.00097 | 0.00054 | -0.0019 | -0.0001 |
| 1.3E-05 | 2.1E-05 | 0.00017 | -0.0012 | -0.0009 |
| 1.3E-05 | 0.00042 | 0.00147 | -0.0006 | -5E-05  |
| 1.3E-05 | 0.00017 | 0.00064 | -0.0003 | -0.0003 |
| 1.3E-05 | 0.00159 | 0.00091 | -0.0012 | -0.0004 |
| 1.3E-05 | -0.0002 | 0.00051 | -0.0002 | -4E-05  |
| 1.3E-05 | 0.00067 | 0.00036 | -0.0005 | 0.00095 |
| 1.3E-05 | 0.00067 | 0.00051 | -0.0004 | 0.0008  |
| 1.3E-05 | 0.0004  | 0.00083 | -0.0008 | 0.00104 |
| 1.3E-05 | 7.3E-05 | 0.00065 | -0.0009 | 0.00074 |
| 1.4E-05 | 0.00045 | 0.00028 | -0.0016 | 0.00061 |
| 1.4E-05 | -7E-05  | 0.00034 | -0.0013 | 0.0004  |
| 1.4E-05 | -0.0008 | 0.00028 | -0.001  | 0.00077 |
| 1.4E-05 | -0.0001 | 6.1E-05 | -0.001  | 0.00052 |
| 1.4E-05 | 0.00024 | 0.00029 | -0.001  | -2E-05  |
| 1.4E-05 | 7.8E-05 | 0.00039 | -0.0005 | -0.0007 |
| 1.4E-05 | 0.00137 | 0.00044 | -0.0017 | -0.0001 |
| 1.4E-05 | 0.00069 | 0.00075 | -0.0015 | -0.0003 |
| 1.4E-05 | 0.00047 | -0.0003 | -0.001  | 0.00016 |
| 1.4E-05 | -9E-05  | 0.00025 | -0.0016 | 0.00051 |
| 1.4E-05 | -0.0001 | 0.00067 | -0.0005 | 0.00029 |
| 1.4E-05 | 0.00093 | 0.00014 | -0.0008 | 0.00075 |
| 1.4E-05 | 0.00094 | 0.00071 | -0.0003 | -0.0002 |
| 1.4E-05 | 0.00019 | 0.00017 | -0.0009 | 0.0007  |
| 1.4E-05 | 0.00094 | 0.00064 | -0.0013 | -0.0002 |
| 1.4E-05 | 0.00069 | 0.0008  | -0.0007 | 0.00011 |
| 1.4E-05 | 0.00072 | 0.00057 | -0.0022 | 0.0008  |
| 1.4E-05 | 0.00039 | 0.00051 | -0.0014 | 0.00036 |
| 1.4E-05 | 0.001   | 0.00037 | -0.0006 | -7E-05  |
| 1.4E-05 | 0.00051 | 0.00086 | -0.0016 | 0.00027 |
| 1.4E-05 | -0.0008 | 0.00038 | -0.001  | 0.0002  |
| 1.4E-05 | 0.00011 | 0.00082 | -0.0014 | 0.00072 |
| 1.4E-05 | 0.00075 | 0.00068 | -0.0013 | -0.0002 |
| 1.4E-05 | 0.00039 | 0.00099 | -0.0011 | 0.00019 |
| 1.4E-05 | 0.00033 | 0.00083 | -0.0016 | -0.0002 |
| 1.4E-05 | -0.0003 | 0.00013 | -0.0007 | 6.5E-05 |
| 1.4E-05 | 0.00061 | -8E-05  | -0.0014 | -0.0001 |
| 1.4E-05 | 0.00107 | 0.0008  | -0.001  | 0.00069 |

|         |         |         |         |         |
|---------|---------|---------|---------|---------|
| 1.4E-05 | 0.00061 | 0.00073 | -0.0012 | 0.00021 |
| 1.4E-05 | 0.00025 | 0.00104 | -0.0002 | 0.00054 |
| 1.4E-05 | 0.00039 | 0.00072 | -0.0011 | 0.00013 |
| 1.5E-05 | 0.00077 | 0.00072 | -0.0003 | -0.0001 |
| 1.5E-05 | -0.0001 | 3.4E-05 | -0.0006 | -0.0004 |
| 1.5E-05 | -0.0004 | 0.00091 | -0.0017 | 0.00052 |
| 1.5E-05 | 3.8E-05 | 0.00066 | -0.0008 | -0.0004 |
| 1.5E-05 | -0.0001 | 0.00072 | -0.0015 | -0.0002 |
| 1.5E-05 | -0.0003 | 0.00099 | -0.001  | -0.0004 |
| 1.5E-05 | 0.0004  | 0.00024 | -0.0006 | -0.0004 |
| 1.5E-05 | 7.8E-05 | 0.00057 | -0.0017 | 7.4E-05 |
| 1.5E-05 | -0.0003 | 0.00055 | -0.0013 | -0.0002 |
| 1.5E-05 | 0.00023 | 0.00029 | -0.0012 | -1E-04  |
| 1.5E-05 | 0.00137 | 0.00081 | -0.0012 | -0.0002 |
| 1.5E-05 | 0.00042 | 0.00086 | -0.0013 | -0.0007 |
| 1.5E-05 | 0.00067 | 0.00034 | -0.0015 | 0.00055 |
| 1.5E-05 | 0.00045 | 0.00093 | -0.0004 | 0.00052 |
| 1.5E-05 | 0.00045 | 0.00065 | -0.0008 | 0.00011 |
| 1.5E-05 | 0.00102 | 0.00068 | -0.0008 | -0.0002 |

**Table SI.18:** Primary kinetic data for the reaction of 1-methyl-2-oxazolidinone (**S18**) with CumO• generated by 355 nm LFP in MeCN (**Figure SI.18**).

| t / s   | $\Delta A$ 1-methyl-2-oxazolidinone ( <b>S18</b> ) |               |               |               |               |
|---------|----------------------------------------------------|---------------|---------------|---------------|---------------|
|         | <b>0.115M</b>                                      | <b>0.285M</b> | <b>0.449M</b> | <b>0.608M</b> | <b>0.814M</b> |
| -1E-06  | 0.00044                                            | -0.0004       | -0.0007       | 3.3E-05       | 0.00096       |
| -1E-06  | 0.00106                                            | -0.0006       | -0.0004       | 0.00035       | -0.0008       |
| -9E-07  | 0.00087                                            | -7E-05        | -0.0005       | -0.0006       | 0.00081       |
| -9E-07  | 0.00112                                            | -0.0002       | 0.00036       | -2E-05        | 0.00027       |
| -9E-07  | 0.00042                                            | -0.0011       | -0.0002       | 0.00019       | 0.00013       |
| -8E-07  | 0.00096                                            | -0.0008       | 0.00038       | 0.00024       | 0.00047       |
| -8E-07  | 0.00102                                            | 1.3E-05       | -0.0005       | 9E-05         | 0.00142       |
| -8E-07  | 0.00036                                            | -0.0007       | 0.00024       | -0.0003       | 0.00059       |
| -7E-07  | 0.00035                                            | -0.0009       | -9E-05        | -4E-06        | 0.00062       |
| -7E-07  | 0.0003                                             | -0.0006       | 0.00028       | 0.00096       | 0.00109       |
| -7E-07  | 0.00048                                            | -0.0003       | -0.0004       | -0.0002       | 0.00044       |
| -6E-07  | 0.0008                                             | -0.0009       | 8.4E-05       | 0.00026       | 0.00131       |
| -6E-07  | 0.00096                                            | -0.0006       | -0.0008       | -0.0008       | -0.0001       |
| -6E-07  | 0.00147                                            | -0.0005       | 0.00028       | -4E-05        | 0.00022       |
| -5E-07  | 0.00013                                            | -0.0012       | -0.0002       | -0.0008       | 0.00034       |
| -5E-07  | 0.00078                                            | -0.0008       | -0.0003       | -0.0007       | 0.00106       |
| -5E-07  | 0.00029                                            | -0.0006       | 0.00071       | 0.00054       | 0.0001        |
| -4E-07  | 0.00063                                            | -0.0006       | -0.0004       | 0.00115       | 0.00037       |
| -4E-07  | 0.00095                                            | -0.0004       | -0.0002       | 0.00074       | -0.0003       |
| -4E-07  | 0.001                                              | -0.0008       | -5E-05        | -0.0003       | -0.0002       |
| -4E-07  | 0.00137                                            | -0.0009       | 0.00027       | 0.00014       | 0.00022       |
| -3E-07  | 0.00061                                            | -0.0005       | 0.00033       | 0.00044       | -0.0003       |
| -3E-07  | 0.00099                                            | -0.0007       | -0.0003       | 0.00017       | 0.00027       |
| -3E-07  | 0.0008                                             | -1E-04        | -0.0001       | -0.0004       | 0.00088       |
| -2E-07  | 0.00055                                            | -0.0007       | -0.0005       | 7.9E-05       | 0.00012       |
| -2E-07  | 0.00097                                            | -0.0001       | 4.5E-05       | 0.00014       | 0.00101       |
| -2E-07  | 0.00081                                            | -0.001        | -0.0003       | -0.0003       | 6.9E-05       |
| -1E-07  | 0.00111                                            | -0.0006       | -0.0001       | 0.00025       | -0.0004       |
| -1E-07  | 0.00077                                            | -0.0004       | -0.0006       | 0.00046       | -0.0003       |
| -6E-08  | 0.00067                                            | -9E-05        | -0.0003       | 0.00122       | 0.00032       |
| -3E-08  | 8.1E-05                                            | -0.0008       | 0.00018       | -0.0008       | 0.00065       |
| -3E-10  | -0.003                                             | -0.0041       | -0.0038       | -0.004        | -0.0035       |
| 3.2E-08 | -0.0082                                            | -0.0145       | -0.0141       | -0.0178       | -0.0176       |
| 6.4E-08 | 0.02646                                            | 0.02258       | 0.02165       | 0.01921       | 0.01621       |
| 9.6E-08 | 0.02773                                            | 0.02686       | 0.02711       | 0.025         | 0.02402       |
| 1.3E-07 | 0.02722                                            | 0.02509       | 0.02574       | 0.02398       | 0.02162       |
| 1.6E-07 | 0.02725                                            | 0.02377       | 0.02436       | 0.02281       | 0.02056       |
| 1.9E-07 | 0.02566                                            | 0.02383       | 0.02243       | 0.02108       | 0.01904       |
| 2.2E-07 | 0.02519                                            | 0.02159       | 0.02102       | 0.01964       | 0.01793       |
| 2.6E-07 | 0.02493                                            | 0.02152       | 0.01991       | 0.01843       | 0.01752       |
| 2.9E-07 | 0.0231                                             | 0.02058       | 0.01958       | 0.0171        | 0.01587       |
| 3.2E-07 | 0.02238                                            | 0.01937       | 0.01765       | 0.01645       | 0.01387       |
| 3.5E-07 | 0.02222                                            | 0.01882       | 0.01701       | 0.0151        | 0.01352       |
| 3.8E-07 | 0.02152                                            | 0.01774       | 0.016         | 0.01394       | 0.01261       |
| 4.2E-07 | 0.02038                                            | 0.01676       | 0.01504       | 0.01291       | 0.01143       |
| 4.5E-07 | 0.02043                                            | 0.01559       | 0.01492       | 0.01323       | 0.01087       |
| 4.8E-07 | 0.01946                                            | 0.01516       | 0.01372       | 0.01173       | 0.01059       |
| 5.1E-07 | 0.01827                                            | 0.01461       | 0.01302       | 0.01103       | 0.009         |
| 5.4E-07 | 0.01785                                            | 0.01475       | 0.01211       | 0.01056       | 0.00926       |

|         |         |         |         |         |         |
|---------|---------|---------|---------|---------|---------|
| 5.8E-07 | 0.01754 | 0.01315 | 0.01157 | 0.00999 | 0.00828 |
| 6.1E-07 | 0.01793 | 0.01259 | 0.01018 | 0.00979 | 0.00807 |
| 6.4E-07 | 0.01665 | 0.01221 | 0.01058 | 0.00879 | 0.00673 |
| 6.7E-07 | 0.0167  | 0.01183 | 0.01021 | 0.00785 | 0.00709 |
| 7E-07   | 0.01549 | 0.01088 | 0.00971 | 0.00735 | 0.00621 |
| 7.4E-07 | 0.01552 | 0.01131 | 0.0096  | 0.00736 | 0.00656 |
| 7.7E-07 | 0.0148  | 0.0101  | 0.0087  | 0.00689 | 0.00566 |
| 8E-07   | 0.01416 | 0.01022 | 0.00828 | 0.0066  | 0.00497 |
| 8.3E-07 | 0.0133  | 0.00892 | 0.00743 | 0.00625 | 0.0049  |
| 8.6E-07 | 0.01325 | 0.00916 | 0.0076  | 0.0056  | 0.00409 |
| 9E-07   | 0.01283 | 0.00917 | 0.00727 | 0.00533 | 0.0042  |
| 9.3E-07 | 0.01201 | 0.00873 | 0.00704 | 0.00461 | 0.00335 |
| 9.6E-07 | 0.01207 | 0.00752 | 0.0066  | 0.00497 | 0.00366 |
| 9.9E-07 | 0.0119  | 0.00773 | 0.00603 | 0.00423 | 0.00344 |
| 1E-06   | 0.01149 | 0.00715 | 0.0058  | 0.00451 | 0.0031  |
| 1.1E-06 | 0.01108 | 0.00671 | 0.00513 | 0.00407 | 0.00336 |
| 1.1E-06 | 0.0114  | 0.00648 | 0.00496 | 0.00425 | 0.00263 |
| 1.1E-06 | 0.01028 | 0.00594 | 0.00468 | 0.0031  | 0.0032  |
| 1.2E-06 | 0.01002 | 0.00634 | 0.00559 | 0.00328 | 0.00298 |
| 1.2E-06 | 0.00962 | 0.00569 | 0.00421 | 0.0024  | 0.00312 |
| 1.2E-06 | 0.00949 | 0.00527 | 0.00421 | 0.0026  | 0.00303 |
| 1.2E-06 | 0.01036 | 0.00482 | 0.0042  | 0.00264 | 0.00296 |
| 1.3E-06 | 0.00911 | 0.00498 | 0.00296 | 0.00261 | 0.00253 |
| 1.3E-06 | 0.00901 | 0.00557 | 0.0035  | 0.00279 | 0.00252 |
| 1.3E-06 | 0.00892 | 0.00493 | 0.00331 | 0.00294 | 0.00274 |
| 1.4E-06 | 0.00864 | 0.00447 | 0.00329 | 0.00236 | 0.00228 |
| 1.4E-06 | 0.00911 | 0.00423 | 0.004   | 0.00301 | 0.00235 |
| 1.4E-06 | 0.00774 | 0.00383 | 0.00337 | 0.00242 | 0.0027  |
| 1.5E-06 | 0.00795 | 0.00449 | 0.00347 | 0.00253 | 0.00263 |
| 1.5E-06 | 0.00783 | 0.00362 | 0.00266 | 0.00182 | 0.00187 |
| 1.5E-06 | 0.00778 | 0.00502 | 0.00272 | 0.00177 | 0.00144 |
| 1.6E-06 | 0.0074  | 0.0031  | 0.00275 | 0.00199 | 0.00182 |
| 1.6E-06 | 0.00716 | 0.0035  | 0.00285 | 0.00183 | 0.00262 |
| 1.6E-06 | 0.00707 | 0.00329 | 0.00296 | 0.00136 | 0.00267 |
| 1.7E-06 | 0.00651 | 0.00352 | 0.00207 | 0.00097 | 0.00207 |
| 1.7E-06 | 0.00585 | 0.0028  | 0.00257 | 0.00135 | 0.00167 |
| 1.7E-06 | 0.00595 | 0.00358 | 0.00203 | 0.00136 | 0.0021  |
| 1.8E-06 | 0.00631 | 0.00302 | 0.00251 | 0.00107 | 0.00218 |
| 1.8E-06 | 0.00609 | 0.00198 | 0.00238 | 0.00156 | 0.00167 |
| 1.8E-06 | 0.00606 | 0.00177 | 0.0016  | 0.00081 | 0.00117 |
| 1.9E-06 | 0.006   | 0.00269 | 0.00159 | 0.00129 | 0.00091 |
| 1.9E-06 | 0.00639 | 0.00271 | 0.00181 | 0.00142 | 0.0014  |
| 1.9E-06 | 0.00565 | 0.0023  | 0.00198 | 0.00107 | 0.00215 |
| 2E-06   | 0.00578 | 0.00272 | 0.00237 | 0.00123 | 0.0018  |
| 2E-06   | 0.00523 | 0.00168 | 0.00121 | 0.00137 | 0.00198 |
| 2E-06   | 0.00494 | 0.00133 | 0.0012  | 0.00176 | 0.00093 |
| 2E-06   | 0.00473 | 0.0016  | 0.00072 | 0.00088 | 0.00166 |
| 2.1E-06 | 0.00527 | 0.00188 | 0.00068 | 0.00185 | 0.00144 |
| 2.1E-06 | 0.00432 | 0.00138 | 0.0009  | 0.0007  | 0.00173 |
| 2.1E-06 | 0.00457 | 0.00111 | 0.00158 | 0.00128 | 0.00167 |
| 2.2E-06 | 0.00502 | 0.00145 | 0.00115 | 0.00131 | 0.00144 |
| 2.2E-06 | 0.00449 | 0.00102 | 0.00077 | 0.00109 | 0.00158 |
| 2.2E-06 | 0.00411 | 0.00135 | 0.00126 | 0.00018 | 0.00144 |
| 2.3E-06 | 0.0039  | 0.00083 | 0.00132 | 0.00117 | 0.00129 |

|         |         |         |         |         |         |
|---------|---------|---------|---------|---------|---------|
| 2.3E-06 | 0.00412 | 0.00156 | 0.0017  | 0.00116 | 0.00193 |
| 2.3E-06 | 0.00446 | 0.00089 | 0.00121 | 0.00087 | 0.00194 |
| 2.4E-06 | 0.00349 | 0.00081 | 0.00045 | 0.00075 | 0.0013  |
| 2.4E-06 | 0.00407 | 0.00043 | 0.00074 | 0.00066 | 0.00104 |
| 2.4E-06 | 0.00358 | 0.00122 | 0.00026 | 0.00028 | 0.00199 |
| 2.5E-06 | 0.00374 | 0.00165 | 0.00053 | 0.00079 | 0.00215 |
| 2.5E-06 | 0.00449 | 0.00178 | -2E-06  | 0.00124 | 0.00163 |
| 2.5E-06 | 0.00368 | 0.00167 | 0.0006  | 0.00068 | 0.00171 |
| 2.6E-06 | 0.00366 | 0.00176 | 0.00092 | 0.00088 | 0.00139 |
| 2.6E-06 | 0.00333 | 0.00021 | 0.00115 | 0.00064 | 0.00152 |
| 2.6E-06 | 0.00259 | 0.00067 | 0.00024 | 0.00112 | 0.00132 |
| 2.7E-06 | 0.00307 | 0.0003  | 0.0003  | 0.00033 | 0.00106 |
| 2.7E-06 | 0.00343 | 0.00094 | 0.00026 | -6E-05  | 0.0014  |
| 2.7E-06 | 0.00254 | 0.00103 | 0.00038 | 2.8E-05 | 0.00143 |
| 2.8E-06 | 0.00229 | 0.00056 | 0.00085 | -0.0001 | 0.00152 |
| 2.8E-06 | 0.00279 | 0.00024 | 0.00098 | 0.00048 | 0.00118 |
| 2.8E-06 | 0.00345 | 0.00065 | 0.00041 | 0.00035 | 0.00207 |
| 2.8E-06 | 0.00383 | 0.00103 | 8.4E-06 | 0.00053 | 0.00186 |
| 2.9E-06 | 0.00303 | 0.00062 | 0.00024 | 0.00061 | 0.00105 |
| 2.9E-06 | 0.00353 | 0.00109 | 0.00042 | 0.00042 | 0.00161 |
| 2.9E-06 | 0.00336 | 0.00091 | -0.0004 | -2E-05  | 0.00158 |
| 3E-06   | 0.0031  | 0.00093 | 0.00101 | -0.0003 | 0.00115 |
| 3E-06   | 0.0028  | 0.00044 | 0.00068 | -0.0006 | 0.00176 |
| 3E-06   | 0.00251 | 0.00026 | -0.0003 | -8E-05  | 0.00112 |
| 3.1E-06 | 0.00225 | 0.00115 | 0.00012 | 0.00129 | 0.0016  |
| 3.1E-06 | 0.00327 | 0.00032 | 0.00027 | 0.00136 | 0.00121 |
| 3.1E-06 | 0.00222 | 0.00031 | -0.0006 | 0.00062 | 0.00125 |
| 3.2E-06 | 0.00258 | 0.00028 | 0.00017 | 0.00067 | 0.00171 |
| 3.2E-06 | 0.00296 | 0.00092 | -0.0002 | 0.00076 | 0.00067 |
| 3.2E-06 | 0.00272 | 0.00047 | 0.00028 | -4E-05  | 0.0021  |
| 3.3E-06 | 0.00266 | 0.00075 | 4.2E-05 | 0.00066 | 0.0011  |
| 3.3E-06 | 0.00196 | 2.8E-05 | 0.00055 | 0.00035 | 0.00016 |
| 3.3E-06 | 0.0032  | 0.00011 | -0.0001 | 0.00031 | 0.00179 |
| 3.4E-06 | 0.00211 | 0.00073 | 0.00045 | -0.0001 | 0.00118 |
| 3.4E-06 | 0.00247 | 3.3E-05 | 0.00044 | 0.0012  | 0.00153 |
| 3.4E-06 | 0.00187 | 0.00023 | 0.00018 | 0.00046 | 0.00148 |
| 3.5E-06 | 0.0022  | -0.0002 | -0.0002 | 5.9E-05 | 0.00172 |
| 3.5E-06 | 0.00208 | 0.00064 | 0.00029 | 0.00025 | 0.00151 |
| 3.5E-06 | 0.00167 | -0.0007 | -0.0007 | -0.0004 | 0.0014  |
| 3.6E-06 | 0.00185 | -0.0002 | -0.0002 | -9E-05  | 0.00187 |
| 3.6E-06 | 0.00149 | 0.0001  | 8.3E-05 | -4E-05  | 0.00083 |
| 3.6E-06 | 0.00118 | 0.00014 | -1E-04  | 0.00135 | 0.00122 |
| 3.6E-06 | 0.00164 | -0.0005 | 0.00112 | 0.00096 | 0.00163 |
| 3.7E-06 | 0.00154 | 0.00024 | 0.00036 | 0.00091 | 0.0013  |
| 3.7E-06 | 0.00144 | -2E-05  | -0.0001 | 7.6E-05 | 0.00159 |
| 3.7E-06 | 0.00203 | 0.0009  | 0.00044 | 0.00024 | 0.00119 |
| 3.8E-06 | 0.00203 | 0.00065 | -0.0006 | 0.0006  | 0.00164 |
| 3.8E-06 | 0.00191 | 9.3E-05 | 0.00051 | 7.9E-05 | 0.00179 |
| 3.8E-06 | 0.00183 | 0.00013 | 0.00033 | 0.00018 | 0.00161 |
| 3.9E-06 | 0.00226 | 0.00032 | 0.00022 | 0.00115 | 0.00125 |
| 3.9E-06 | 0.0021  | 0.00015 | 3.2E-05 | 0.00056 | 0.00077 |
| 3.9E-06 | 0.00176 | -0.0006 | 0.00107 | 0.00056 | 0.00085 |
| 4E-06   | 0.00117 | 0.00037 | 5.1E-05 | 0.00104 | 0.00104 |
| 4E-06   | 0.00148 | 2.2E-05 | -9E-05  | 0.00026 | 0.00105 |

|         |         |         |         |         |         |
|---------|---------|---------|---------|---------|---------|
| 4E-06   | 0.00107 | -0.0005 | -5E-05  | -0.0003 | 0.00152 |
| 4.1E-06 | 0.00109 | -0.0005 | -0.0002 | 0.0003  | 0.00215 |
| 4.1E-06 | 0.00124 | 8.5E-05 | 0.0004  | 0.00095 | 0.00205 |
| 4.1E-06 | 0.00165 | -4E-05  | -0.0001 | 0.00033 | 0.001   |
| 4.2E-06 | 0.00137 | 0.00036 | 0.00028 | 0.00049 | 0.00122 |
| 4.2E-06 | 0.00186 | 0.0004  | -0.0007 | 0.00033 | 0.00046 |
| 4.2E-06 | 0.00144 | -0.0008 | -0.0014 | -2E-05  | 0.00124 |
| 4.3E-06 | 0.00105 | 5.1E-05 | -0.0004 | 0.0005  | 0.00093 |
| 4.3E-06 | 0.0017  | 0.00017 | 0.00065 | 0.0001  | 0.00188 |
| 4.3E-06 | 0.00168 | 0.00037 | 0.00042 | 0.00016 | 0.00171 |
| 4.4E-06 | 0.00133 | 0.00035 | 6.9E-05 | 0.00115 | 0.00154 |
| 4.4E-06 | 0.0011  | 6.4E-05 | -8E-05  | 0.00085 | 0.00128 |
| 4.4E-06 | 0.00173 | 0.00019 | 0.00047 | 0.00111 | 0.00186 |
| 4.4E-06 | 0.00189 | 3.2E-05 | 5.3E-05 | 0.00036 | 0.00136 |
| 4.5E-06 | 0.00087 | -0.0003 | -0.0003 | 0.00063 | 0.00143 |
| 4.5E-06 | 0.00158 | 6.3E-05 | 0.00043 | 0.00075 | 0.00162 |
| 4.5E-06 | 0.00128 | -9E-05  | 4E-05   | 0.00084 | 0.00094 |
| 4.6E-06 | 0.00146 | 0.00015 | -0.0004 | 0.00052 | 0.00129 |
| 4.6E-06 | 0.00159 | -0.0011 | 0.00024 | 0.00039 | 0.00073 |
| 4.6E-06 | 0.00086 | -0.0007 | -0.0003 | 0.00028 | 0.00203 |
| 4.7E-06 | 0.00169 | -0.0007 | -0.0005 | 0.00106 | 0.00127 |
| 4.7E-06 | 0.0013  | -0.0006 | -0.0007 | 0.00153 | 0.00144 |
| 4.7E-06 | 0.00174 | -0.0003 | 0.00043 | 0.00095 | 0.00094 |
| 4.8E-06 | 0.00183 | -0.0002 | -0.0007 | 0.00119 | 0.00193 |
| 4.8E-06 | 0.00117 | -0.0004 | -0.0007 | 0.00119 | 0.00153 |
| 4.8E-06 | 0.00141 | -1E-05  | 4.1E-05 | 0.00086 | 0.00094 |
| 4.9E-06 | 0.00175 | 7.5E-05 | 0.00031 | 0.00126 | 0.0009  |
| 4.9E-06 | 0.00136 | 0.00037 | 0.0002  | -0.0004 | 0.00082 |
| 4.9E-06 | 0.00148 | -0.0013 | 0.00017 | 0.00114 | 0.00095 |
| 5E-06   | 0.00149 | -0.0002 | 0.00019 | 0.00076 | 0.00107 |
| 5E-06   | 0.00138 | -0.0001 | -9E-05  | 0.00057 | 0.00162 |
| 5E-06   | 0.00227 | -0.0004 | -0.0004 | 0.001   | 0.00206 |
| 5.1E-06 | 0.00152 | -0.0002 | -0.0002 | 0.00104 | 0.00107 |
| 5.1E-06 | 0.00176 | -0.0002 | 0.0003  | 0.00122 | 0.00181 |
| 5.1E-06 | 0.00128 | -0.0005 | 0.00116 | 0.00116 | 0.00135 |
| 5.2E-06 | 0.00182 | -0.0008 | -3E-05  | 0.00099 | 0.00085 |
| 5.2E-06 | 0.00107 | -0.0007 | 0.00025 | 0.00056 | 0.00089 |
| 5.2E-06 | 0.00123 | -0.0008 | -8E-05  | 0.00039 | 0.00114 |
| 5.2E-06 | 0.00119 | 5.4E-05 | -0.0006 | 0.00049 | 0.00149 |
| 5.3E-06 | 0.00091 | 0.00016 | 0.00017 | 0.00045 | 0.00125 |
| 5.3E-06 | 0.00092 | -0.0014 | -0.0002 | 0.00055 | 0.00154 |
| 5.3E-06 | 0.00125 | -9E-05  | -0.0002 | 0.0004  | 0.00147 |
| 5.4E-06 | 0.00049 | 0.00024 | 0.00034 | 0.00063 | 0.0012  |
| 5.4E-06 | 0.00091 | -0.0004 | -1E-05  | 0.0003  | 0.00104 |
| 5.4E-06 | 0.00103 | -0.0008 | 0.00034 | 0.0007  | 0.00157 |
| 5.5E-06 | 0.00165 | -0.0003 | -0.0007 | 0.00074 | 0.00138 |
| 5.5E-06 | 0.00046 | 0.00021 | -2E-05  | 0.00078 | 0.00112 |
| 5.5E-06 | 0.00057 | -0.0003 | -0.0004 | 0.00119 | 0.00105 |
| 5.6E-06 | 0.00066 | -0.001  | -5E-05  | 0.00056 | 0.00019 |
| 5.6E-06 | 0.00062 | -0.0002 | -0.0005 | 0.00021 | 0.00233 |
| 5.6E-06 | 0.00093 | -0.0003 | -0.0003 | 0.00065 | 0.00112 |
| 5.7E-06 | 0.00136 | -0.0002 | -0.0002 | 0.00015 | 0.00122 |
| 5.7E-06 | 0.00051 | -9E-06  | 0.00043 | -0.0001 | 0.00095 |
| 5.7E-06 | 0.0009  | -0.0001 | -3E-05  | -0.0001 | 0.00141 |

|         |         |         |         |         |         |
|---------|---------|---------|---------|---------|---------|
| 5.8E-06 | 0.00089 | -0.0003 | -0.0003 | 0.00046 | 0.00183 |
| 5.8E-06 | 0.00095 | -0.0001 | 0.00022 | 7.9E-05 | 0.00051 |
| 5.8E-06 | 0.00113 | 0.00016 | -0.0009 | 0.00112 | 0.00178 |
| 5.9E-06 | 0.00128 | -5E-05  | -1E-05  | 0.0005  | 0.00077 |
| 5.9E-06 | 0.00063 | -0.0004 | 0.0009  | 0.00103 | 0.0015  |
| 5.9E-06 | 0.00103 | 0.00054 | -0.0003 | 0.00072 | 0.00148 |
| 6E-06   | 0.00113 | -0.0008 | -0.0004 | 0.00078 | 0.00146 |
| 6E-06   | 0.00128 | -0.0005 | -0.0008 | 0.00024 | 0.00106 |
| 6E-06   | 0.00132 | -0.0003 | 0.00052 | 0.00044 | 0.00149 |
| 6E-06   | 0.00129 | 7E-06   | -0.0003 | 0.00053 | 0.00169 |
| 6.1E-06 | 0.00081 | -0.0007 | -5E-05  | 0.00011 | 0.00139 |
| 6.1E-06 | 0.00079 | -0.0002 | 3.1E-05 | -4E-05  | 0.00088 |
| 6.1E-06 | 0.001   | -0.0001 | -0.0004 | 0.00058 | 0.00162 |
| 6.2E-06 | 0.00062 | 0.00017 | -0.0008 | 0.00023 | 0.00112 |
| 6.2E-06 | 0.00039 | -0.0005 | -0.0004 | 0.00014 | 0.0015  |
| 6.2E-06 | 0.00126 | -0.0006 | 0.00038 | 0.00107 | 0.00092 |
| 6.3E-06 | 0.00028 | -0.001  | -0.0004 | 0.00085 | 0.00134 |
| 6.3E-06 | 0.00062 | 0.00065 | 0.00062 | 0.00043 | 0.00103 |
| 6.3E-06 | 0.00098 | -9E-06  | -0.001  | 0.00074 | 0.00098 |
| 6.4E-06 | 0.00121 | -0.0002 | 0.00012 | 0.0006  | 0.00113 |
| 6.4E-06 | 0.00043 | -0.0003 | -0.0006 | 9.4E-05 | 0.00057 |
| 6.4E-06 | 0.00065 | 0.00013 | -0.0003 | -0.0006 | 0.00075 |
| 6.5E-06 | 0.00091 | -0.0012 | 8.9E-05 | 1.4E-05 | 0.00074 |
| 6.5E-06 | 0.00072 | -0.0004 | 0.00016 | 0.00073 | 0.00023 |
| 6.5E-06 | 0.00109 | -0.0001 | 1.3E-05 | 5.9E-05 | 0.00071 |
| 6.6E-06 | 0.00138 | 1.4E-05 | 0.00018 | 8.2E-05 | 0.00109 |
| 6.6E-06 | 0.00069 | -0.0002 | 0.00038 | 0.00053 | 0.00163 |
| 6.6E-06 | 0.00036 | -0.0012 | -0.0004 | 6.8E-06 | 0.00136 |
| 6.7E-06 | -0.0003 | -0.0004 | -0.0006 | 0.00074 | 0.00209 |
| 6.7E-06 | 0.0008  | -0.0005 | -0.0005 | 1.2E-05 | 0.00183 |
| 6.7E-06 | 0.00166 | -0.0006 | -0.0002 | 0.00043 | 0.00155 |
| 6.8E-06 | 0.0007  | 7.2E-05 | 0.00041 | 0.00016 | 0.00142 |
| 6.8E-06 | 0.00138 | -0.0002 | -1E-05  | 0.00107 | 0.00136 |
| 6.8E-06 | 0.00054 | -0.0001 | -0.0004 | 0.00084 | 0.00154 |
| 6.8E-06 | 0.00105 | -0.0008 | -0.0003 | 0.0014  | 0.00113 |
| 6.9E-06 | -0.0001 | -0.0001 | -0.0006 | 0.00021 | 0.00132 |
| 6.9E-06 | 0.0009  | -0.0003 | -0.0005 | 3.5E-05 | 0.00076 |
| 6.9E-06 | 0.00137 | -0.0012 | 0.00084 | 0.00059 | 0.00169 |
| 7E-06   | 0.00062 | -0.0003 | -4E-06  | 0.00038 | 0.00095 |
| 7E-06   | 0.0008  | -0.0013 | -0.0007 | 0.00016 | 0.00037 |
| 7E-06   | 0.00031 | -0.0006 | -0.0008 | -0.0001 | 0.00111 |
| 7.1E-06 | 0.00144 | -0.0002 | 0.00012 | 0.00036 | 0.00067 |
| 7.1E-06 | 0.00043 | -3E-05  | -0.0001 | 0.00026 | 0.00133 |
| 7.1E-06 | -4E-05  | 5.5E-05 | 0.00026 | -8E-05  | 0.00116 |
| 7.2E-06 | 4.4E-05 | -0.0001 | -0.0003 | -3E-05  | 0.00159 |
| 7.2E-06 | 0.00056 | -0.0002 | -0.0006 | -7E-05  | 0.00112 |
| 7.2E-06 | 0.00056 | 8.1E-06 | -0.0002 | 0.00097 | 0.00095 |
| 7.3E-06 | 0.00082 | -0.0007 | -2E-05  | 0.00017 | 0.00165 |
| 7.3E-06 | 0.00088 | -0.0007 | -0.0001 | 0.00098 | 0.00059 |
| 7.3E-06 | 0.00058 | -9E-05  | 0.00031 | 8.5E-05 | 0.00052 |
| 7.4E-06 | 0.00107 | -0.0007 | -0.0005 | 0.00034 | 0.00128 |
| 7.4E-06 | -0.0001 | -0.0005 | 0.00013 | 0.00076 | 0.0005  |
| 7.4E-06 | 0.00109 | -0.0007 | -0.0004 | 0.00061 | 0.00092 |
| 7.5E-06 | 0.00147 | -4E-05  | -9E-05  | 0.0004  | 0.0013  |



|         |         |         |         |         |         |
|---------|---------|---------|---------|---------|---------|
| 7.5E-06 | 0.00042 | -7E-05  | 0.00031 | 0.00036 | 0.00168 |
| 7.5E-06 | 0.00079 | -0.0001 | -0.0001 | 0.00012 | 0.00101 |
| 7.6E-06 | 0.001   | -9E-05  | -0.0012 | 0.0012  | 0.00171 |
| 7.6E-06 | 0.00047 | -0.0005 | -4E-05  | 0.00031 | 0.00103 |
| 7.6E-06 | -9E-05  | -0.0006 | -0.0008 | 0.00053 | 0.00122 |
| 7.6E-06 | 0.00089 | 0.00025 | -0.0006 | 0.00103 | -0.0001 |
| 7.7E-06 | 0.00028 | 8.3E-05 | -0.0017 | 0.00072 | 0.00095 |
| 7.7E-06 | 0.00026 | -0.0008 | -0.0008 | -0.0003 | 0.00093 |
| 7.7E-06 | 0.001   | -0.0011 | -0.0002 | 0.00016 | 0.00019 |
| 7.8E-06 | 0.00092 | -0.0003 | -0.0001 | 0.00105 | 0.00011 |
| 7.8E-06 | 0.0004  | -0.0007 | -0.0007 | 0.00061 | 0.00125 |
| 7.8E-06 | 0.00075 | -0.0003 | 0.00022 | 0.00042 | 0.00185 |
| 7.9E-06 | 0.00037 | -0.0003 | 2E-05   | 0.00066 | 0.00092 |
| 7.9E-06 | 0.00043 | -0.0001 | -0.0001 | 0.00041 | 0.00129 |
| 7.9E-06 | 0.00028 | -0.0007 | -0.0001 | 0.0006  | 0.00142 |
| 8E-06   | 0.00057 | 0.0002  | -0.0005 | -0.0003 | 0.00135 |
| 8E-06   | 0.00099 | -0.0006 | -0.0007 | 0.00013 | 0.00129 |
| 8E-06   | -0.0001 | 0.00022 | -0.0005 | 0.00015 | 0.00032 |
| 8.1E-06 | 0.00067 | -2E-05  | -0.0004 | 0.00032 | 0.00133 |
| 8.1E-06 | 0.00061 | -0.0001 | 3.4E-06 | 0.00037 | 0.00072 |
| 8.1E-06 | 0.00107 | -9E-05  | -0.0007 | -0.0002 | 0.00108 |
| 8.2E-06 | 0.00065 | 1.2E-05 | 0.00025 | -0.0002 | 0.00062 |
| 8.2E-06 | 0.0011  | -0.0004 | -0.0014 | 0.0013  | 0.00122 |
| 8.2E-06 | 0.00101 | -0.0004 | -2E-05  | 0.00011 | 0.00045 |
| 8.3E-06 | 0.00098 | -0.0003 | -0.0006 | 0.00066 | 0.00058 |
| 8.3E-06 | 0.00068 | -0.0003 | -0.0009 | 0.00049 | 0.00052 |
| 8.3E-06 | 0.00055 | -0.0001 | -0.0006 | 0.00068 | 0.00064 |
| 8.4E-06 | 0.00118 | -0.0008 | -0.0004 | -0.0005 | 0.00127 |
| 8.4E-06 | 0.00041 | -0.0005 | -0.0003 | 0.00047 | 0.00105 |
| 8.4E-06 | 0.00083 | -0.0008 | -0.001  | 0.00082 | 0.00117 |
| 8.4E-06 | 0.00087 | -0.0009 | 0.00023 | -4E-05  | 0.00061 |
| 8.5E-06 | 0.00064 | 0.00047 | -0.0006 | 0.00092 | 0.001   |
| 8.5E-06 | 0.00077 | 0.00048 | 0.00053 | -0.0001 | 0.00052 |
| 8.5E-06 | 0.00091 | -0.0008 | -0.0003 | 0.00034 | 0.00071 |
| 8.6E-06 | 0.00098 | -0.0003 | 0.00033 | 0.00038 | 0.00118 |
| 8.6E-06 | 0.00059 | -0.0003 | -0.0007 | 0.00044 | 0.0005  |
| 8.6E-06 | 0.00119 | -0.0007 | -0.0002 | 0.00078 | 0.00108 |
| 8.7E-06 | 0.00132 | -0.0006 | -0.0003 | 0.00103 | 2.8E-05 |
| 8.7E-06 | -0.0001 | -0.0011 | -0.0003 | 0.00105 | 0.00087 |
| 8.7E-06 | 0.00099 | -2E-05  | -0.0015 | 0.00058 | 0.00187 |
| 8.8E-06 | 0.00067 | -0.0004 | -0.0011 | 6.7E-05 | 0.00096 |
| 8.8E-06 | 0.00069 | -0.0007 | -0.0003 | 0.00063 | 0.00037 |
| 8.8E-06 | 0.00047 | 0.00022 | -0.0006 | 0.00037 | 0.00109 |
| 8.9E-06 | 0.00018 | -0.0003 | -0.0005 | 0.00035 | 0.00067 |
| 8.9E-06 | 0.00077 | -0.0002 | -0.0008 | 0.00077 | 0.00077 |
| 8.9E-06 | 0.00117 | 0.00013 | 0.0002  | 0.00137 | 0.00046 |
| 9E-06   | 4.9E-05 | -0.0003 | -0.0005 | 0.00091 | 0.00068 |
| 9E-06   | 0.0004  | -0.0002 | 0.00026 | 0.00022 | 0.00124 |
| 9E-06   | 0.00059 | -0.0003 | -0.0002 | 0.00013 | 0.00063 |
| 9.1E-06 | 0.00084 | -0.0007 | -0.0009 | 0.00086 | 0.00097 |
| 9.1E-06 | 0.00095 | -0.0007 | -1E-04  | 0.00067 | 0.00019 |
| 9.1E-06 | 0.00083 | -0.0006 | 8.5E-05 | 0.00076 | 0.0012  |
| 9.2E-06 | 0.00062 | 0.00017 | -0.0008 | 0.00055 | 0.00058 |
| 9.2E-06 | 0.00082 | -0.0004 | -0.0006 | 0.00049 | 0.00071 |

|         |         |         |         |         |         |
|---------|---------|---------|---------|---------|---------|
| 9.2E-06 | 0.00028 | -0.0009 | -0.0008 | 0.00064 | 0.00075 |
| 9.2E-06 | 0.00074 | 0.00011 | -0.0014 | -0.0002 | 0.0012  |
| 9.3E-06 | 0.001   | 0.00012 | -0.0008 | 0.00057 | 0.00113 |
| 9.3E-06 | 0.00063 | 0.00025 | -0.0005 | 0.00014 | 0.00123 |
| 9.3E-06 | 0.00069 | -0.0005 | -0.0013 | 0.00074 | 0.00137 |
| 9.4E-06 | 0.00048 | -7E-05  | -0.0007 | 0.00051 | 0.00137 |
| 9.4E-06 | 0.00093 | -0.0004 | -0.0003 | 0.00032 | 0.00027 |
| 9.4E-06 | 0.00045 | -0.0004 | -0.0005 | 0.00055 | 0.00087 |
| 9.5E-06 | 0.00029 | -9E-05  | -0.0004 | 4.6E-05 | 0.00135 |
| 9.5E-06 | 0.00052 | -0.0005 | -0.0003 | 0.00085 | 0.00112 |
| 9.5E-06 | 0.00061 | -0.0004 | -0.0006 | 0.00079 | 0.00089 |
| 9.6E-06 | 0.00035 | -9E-05  | -0.0011 | 0.00043 | 0.00214 |
| 9.6E-06 | 0.00084 | -0.0003 | -0.0011 | -0.0002 | 0.00117 |
| 9.6E-06 | 9.4E-05 | -0.0007 | -0.0004 | 9.4E-05 | 0.00151 |
| 9.7E-06 | 9.4E-05 | -0.0004 | 9E-05   | 0.0004  | 0.00134 |
| 9.7E-06 | -0.0005 | -0.0003 | -0.0002 | 0.00091 | 0.00105 |
| 9.7E-06 | 0.00069 | -0.0004 | 2.5E-05 | 0.00019 | 0.00111 |
| 9.8E-06 | 4E-05   | -0.0005 | -0.0007 | -0.0002 | 0.00078 |
| 9.8E-06 | 0.0003  | 1.7E-05 | -0.0005 | 0.00032 | 0.00059 |
| 9.8E-06 | 0.00046 | -0.0004 | -0.0002 | 0.00079 | 0.00117 |
| 9.9E-06 | 0.00016 | 0.00012 | -0.0003 | 1.1E-05 | 0.00079 |
| 9.9E-06 | 0.00086 | -0.0009 | -0.0004 | -0.0002 | 0.0012  |
| 9.9E-06 | 0.00159 | -0.0007 | -0.0003 | 0.0002  | 0.00038 |
| 1E-05   | 0.00043 | -0.0005 | -7E-05  | 0.00012 | 0.00099 |
| 1E-05   | 0.00041 | -0.0004 | -0.0005 | 4.7E-05 | 0.0009  |
| 1E-05   | 0.00126 | 0.0002  | 0.00039 | 0.00044 | 0.00091 |
| 1E-05   | 0.00031 | -0.0007 | 5.2E-05 | 0.00038 | 0.00058 |
| 1E-05   | 0.00035 | -0.0007 | 0.00014 | 0.00095 | 0.00095 |
| 1E-05   | 0.00053 | -0.0014 | -0.0003 | 0.00031 | 0.00051 |
| 1E-05   | 0.00127 | -0.0004 | -0.0009 | 0.00071 | 0.00116 |
| 1E-05   | 0.00068 | 9.4E-05 | -0.001  | 0.00014 | 0.00037 |
| 1E-05   | 0.00058 | -0.0006 | -0.0005 | -0.0003 | 0.00083 |
| 1E-05   | 0.00051 | 0.00022 | 0.0001  | 0.00021 | 0.00045 |
| 1E-05   | 0.00103 | -0.0014 | -0.0009 | 0.00047 | 0.00032 |
| 1E-05   | 0.00062 | -0.0003 | 0.00021 | 0.0005  | 0.00088 |
| 1E-05   | 0.00013 | -0.001  | -0.0004 | 0.00019 | 0.00156 |
| 1E-05   | 0.00053 | -0.0009 | -0.0014 | -6E-05  | 0.00095 |
| 1E-05   | 0.00119 | -0.0006 | -0.0006 | -0.0002 | 0.00045 |
| 1E-05   | 0.00152 | -0.0002 | -0.0006 | 0.00076 | 0.0006  |
| 1E-05   | 0.001   | -0.0001 | -0.0002 | 0.00054 | 0.00058 |
| 1.1E-05 | 0.00082 | -0.0002 | -0.0004 | 4.4E-05 | 0.00129 |
| 1.1E-05 | 0.00052 | -0.0006 | -0.0006 | 0.00033 | 0.00073 |
| 1.1E-05 | 0.00052 | 1.9E-05 | 0.00071 | 0.00043 | 0.00085 |
| 1.1E-05 | 0.00034 | 7.3E-05 | -0.0001 | 0.0019  | 0.00115 |
| 1.1E-05 | -5E-05  | -0.0009 | -0.0006 | -0.0005 | 0.0007  |
| 1.1E-05 | 0.00049 | -0.0011 | -0.0007 | 0.00114 | 0.00054 |
| 1.1E-05 | 0.00024 | -0.0006 | -0.0004 | 0.00073 | 0.00034 |
| 1.1E-05 | 0.00044 | -0.0002 | -0.001  | 0.00019 | 0.00117 |
| 1.1E-05 | 0.00018 | -0.0004 | -0.0005 | 7.8E-05 | 0.00033 |
| 1.1E-05 | 0.00103 | -0.0004 | -0.0007 | 0.00047 | 0.00075 |
| 1.1E-05 | 0.00029 | -0.0005 | -0.0015 | -0.0002 | 0.00042 |
| 1.1E-05 | -3E-05  | -0.0009 | -0.0005 | 0.00091 | 0.00065 |
| 1.1E-05 | 0.00086 | -0.0015 | -0.001  | 0.00048 | 0.00135 |
| 1.1E-05 | 0.00088 | 0.00017 | -0.0002 | 0.00024 | 0.00084 |

|         |         |         |         |         |         |
|---------|---------|---------|---------|---------|---------|
| 1.1E-05 | 0.00129 | -0.0001 | -1E-05  | -9E-05  | 0.00061 |
| 1.1E-05 | 0.00088 | 0.00085 | -0.0013 | 0.00087 | 0.00083 |
| 1.1E-05 | 0.00101 | 0.00033 | -0.0013 | -0.0002 | 0.00043 |
| 1.1E-05 | 0.00095 | -0.0005 | -0.0002 | 0.00037 | 0.00068 |
| 1.1E-05 | 0.00052 | -0.0005 | -0.0007 | -2E-05  | 0.00099 |
| 1.1E-05 | 0.00153 | -1E-05  | -0.0001 | -0.0002 | 0.00128 |
| 1.1E-05 | 0.00057 | -0.0016 | -0.0007 | 0.00016 | 0.00103 |
| 1.1E-05 | 0.00052 | -0.0007 | -0.0006 | -0.0001 | 0.00078 |
| 1.1E-05 | 0.00047 | -0.0009 | -0.0003 | -0.0003 | 0.00052 |
| 1.1E-05 | 0.00043 | -0.0009 | -0.0004 | 0.00021 | 0.00032 |
| 1.1E-05 | 0.00074 | -0.0002 | -0.0006 | 0.00026 | 0.00106 |
| 1.1E-05 | 0.00039 | -0.0006 | -0.0007 | 0.00049 | 0.00068 |
| 1.1E-05 | 0.00124 | -0.001  | -0.0003 | 0.0004  | 0.00162 |
| 1.1E-05 | 0.00082 | -0.0006 | -0.001  | 0.001   | 0.00069 |
| 1.1E-05 | 0.00112 | -0.0006 | 0.00056 | 0.00071 | 0.0007  |
| 1.1E-05 | 8.3E-05 | -0.0006 | -0.0006 | 0.00031 | 0.00088 |
| 1.1E-05 | 0.00064 | 0.00017 | -0.0004 | 0.00017 | 0.00088 |
| 1.1E-05 | 0.00054 | -0.0006 | -0.0004 | -9E-05  | 0.00121 |
| 1.2E-05 | 0.00042 | -0.0002 | -0.0005 | 0.00065 | 0.0007  |
| 1.2E-05 | 0.00159 | -0.0011 | 0.00033 | 0.00016 | 0.0012  |
| 1.2E-05 | 0.00115 | -0.0002 | -0.0003 | -1E-04  | 0.00101 |
| 1.2E-05 | 0.00025 | 0.00051 | -4E-05  | 0.00138 | 0.00123 |
| 1.2E-05 | 0.001   | 0.00049 | -0.0005 | 0.00022 | 5.7E-05 |
| 1.2E-05 | 0.00041 | -0.0003 | -0.001  | 0.00131 | 0.00076 |
| 1.2E-05 | 7.4E-05 | -0.0005 | -0.0005 | 0.00038 | 0.00085 |
| 1.2E-05 | 0.00023 | -0.0003 | -0.0004 | -0.0004 | 0.00073 |
| 1.2E-05 | 0.0007  | -0.0004 | -0.0001 | 0.00111 | 0.00014 |
| 1.2E-05 | 0.00064 | -0.0007 | 0.0002  | 0.00074 | 0.00098 |
| 1.2E-05 | 0.00097 | -0.0005 | -0.001  | -9E-06  | 9.8E-05 |
| 1.2E-05 | 0.00026 | -0.001  | -7E-05  | 0.00016 | 0.00084 |
| 1.2E-05 | 0.00025 | -5E-05  | 0.0002  | 0.00119 | 0.00099 |
| 1.2E-05 | 0.00131 | -0.0003 | -0.0014 | 0.00099 | 0.00057 |
| 1.2E-05 | 0.00162 | -0.0001 | -0.0004 | 0.00038 | 9.4E-05 |
| 1.2E-05 | 0.00182 | -0.0012 | 0.00079 | 0.00075 | 0.0008  |
| 1.2E-05 | 0.00149 | 0.00044 | -5E-05  | 0.00019 | 0.00076 |
| 1.2E-05 | 0.00042 | -0.0009 | -0.0008 | 0.00043 | 0.00157 |
| 1.2E-05 | 0.00115 | -0.0005 | -0.0001 | -0.0003 | 0.00087 |
| 1.2E-05 | 0.00046 | -0.0005 | -0.0009 | 0.00021 | 0.00045 |
| 1.2E-05 | 0.00164 | -0.0003 | -0.0008 | -0.0003 | 0.00116 |
| 1.2E-05 | 0.00094 | -0.0009 | -0.0006 | 0.00064 | 0.00041 |
| 1.2E-05 | 0.0003  | 0.00032 | -0.0007 | 0.00108 | 0.0006  |
| 1.2E-05 | 0.0012  | 0.00014 | -0.0004 | 0.00072 | 0.00071 |
| 1.2E-05 | 0.00127 | -0.0004 | -0.0007 | 0.00024 | 0.00085 |
| 1.2E-05 | 0.00051 | -0.001  | -0.0003 | 0.00034 | 0.00092 |
| 1.2E-05 | 0.00094 | -0.0005 | 0.00026 | 0.00021 | 0.00101 |
| 1.2E-05 | 0.00078 | -0.0006 | -0.0006 | -0.0002 | 0.00051 |
| 1.2E-05 | 0.00137 | -0.0001 | -0.0004 | 0.00057 | 0.00041 |
| 1.2E-05 | 7.5E-06 | -0.0007 | -0.0003 | 0.00025 | 0.00087 |
| 1.2E-05 | 0.00056 | -0.0004 | -0.0005 | -0.0002 | 0.00119 |
| 1.3E-05 | 0.00038 | -0.001  | 8.9E-05 | -0.0001 | 0.00062 |
| 1.3E-05 | 0.00017 | -0.0004 | -0.0005 | 7.2E-05 | 0.00033 |
| 1.3E-05 | 0.00019 | -0.0006 | -0.0003 | 0.00042 | 0.0008  |
| 1.3E-05 | 0.00113 | -0.0005 | 0.00041 | 0.00045 | 0.0005  |
| 1.3E-05 | -0.0004 | -0.0009 | -0.0003 | 6.5E-05 | 0.00063 |

|         |         |         |         |         |         |
|---------|---------|---------|---------|---------|---------|
| 1.3E-05 | -0.0005 | -0.0006 | -0.0004 | -3E-05  | 0.00086 |
| 1.3E-05 | 0.00115 | -0.0005 | -0.0006 | 0.00016 | 0.00104 |
| 1.3E-05 | 0.00118 | -0.0008 | -0.0006 | 4.9E-05 | 0.00059 |
| 1.3E-05 | 0.00059 | 0.00013 | -0.0003 | 0.00042 | 0.00078 |
| 1.3E-05 | 0.00104 | -0.0004 | 3.7E-05 | -1E-05  | 0.00058 |
| 1.3E-05 | 0.00045 | -0.0005 | 0.00076 | 0.00048 | -0.0002 |
| 1.3E-05 | 0.00106 | -0.0008 | -6E-05  | 0.00032 | 0.00102 |
| 1.3E-05 | 0.00071 | -0.0006 | 0.00012 | 0.00034 | 0.00034 |
| 1.3E-05 | 0.00043 | -0.0004 | -0.0002 | 0.00056 | 0.00058 |
| 1.3E-05 | 0.00061 | -0.0002 | -2E-05  | 0.00015 | 0.00067 |
| 1.3E-05 | 0.00046 | -0.0008 | -0.0009 | 0.00055 | 0.00113 |
| 1.3E-05 | 0.00144 | -0.0007 | -0.001  | 0.00011 | -0.0002 |
| 1.3E-05 | 0.00175 | -0.0011 | -0.0008 | 0.00071 | 0.0007  |
| 1.3E-05 | 0.00141 | -0.0008 | 0.00048 | 0.00047 | 0.00061 |
| 1.3E-05 | 0.00112 | -0.0007 | -0.0007 | 0.0007  | 0.0008  |
| 1.3E-05 | 0.00046 | -0.0005 | -0.0011 | 0.00021 | 0.00076 |
| 1.3E-05 | 0.00119 | -0.0011 | -0.0007 | 0.0005  | 0.00058 |
| 1.3E-05 | 0.00029 | 0.00033 | 0.00078 | 0.00081 | 0.00043 |
| 1.3E-05 | 0.00138 | -0.0002 | -0.0001 | 0.00052 | 0.00087 |
| 1.3E-05 | 0.00057 | -0.0005 | -0.0002 | 0.00058 | -0.0001 |
| 1.3E-05 | 0.00045 | -0.001  | -0.0002 | 0.00063 | 0.00047 |
| 1.3E-05 | -0.0002 | -0.0009 | -0.0004 | 0.00014 | 0.00014 |
| 1.3E-05 | 0.00068 | -0.0005 | 5.4E-05 | 6.4E-05 | 0.00074 |
| 1.3E-05 | 0.00012 | -0.0013 | -0.0001 | 0.00033 | 0.00059 |
| 1.3E-05 | 0.00081 | -0.0006 | -0.0004 | 0.00098 | 0.00071 |
| 1.3E-05 | 0.00025 | -0.0008 | -0.0001 | 0.00081 | 0.00049 |
| 1.4E-05 | 0.00032 | -0.0004 | 8E-05   | 0.00036 | 0.00018 |
| 1.4E-05 | 0.00034 | -0.0003 | -0.0002 | -0.0003 | 0.00068 |
| 1.4E-05 | 0.00037 | 0.00078 | -2E-05  | 0.00035 | 0.00068 |
| 1.4E-05 | 0.00021 | -0.0002 | -0.0003 | 0.00041 | 0.00072 |
| 1.4E-05 | 0.00156 | -0.0004 | 0.0008  | -0.0006 | 0.00138 |
| 1.4E-05 | 0.00034 | 8.7E-05 | -0.0005 | 0.00046 | 0.00085 |
| 1.4E-05 | 0.00074 | -0.001  | 9E-05   | 0.00054 | 0.00069 |
| 1.4E-05 | 0.0005  | -0.0003 | -0.0003 | -0.0003 | 0.0006  |
| 1.4E-05 | 0.0015  | -0.0006 | -5E-05  | 0.00012 | -0.0001 |
| 1.4E-05 | 0.00039 | -0.0001 | -0.0008 | -0.0003 | 0.00079 |
| 1.4E-05 | 0.0007  | -0.0007 | -4E-06  | 0.00058 | 0.00091 |
| 1.4E-05 | 0.00072 | -0.0006 | -0.0011 | 0.00026 | 0.00039 |
| 1.4E-05 | 0.00149 | -0.0007 | -0.0007 | -7E-05  | 0.00085 |
| 1.4E-05 | 0.00038 | -0.0008 | -0.0004 | 7.3E-05 | 0.00058 |
| 1.4E-05 | 0.00049 | -0.0004 | -0.0003 | 0.00035 | 0.00126 |
| 1.4E-05 | 0.00113 | -0.0012 | -0.0005 | 0.00043 | 0.00071 |
| 1.4E-05 | 0.00093 | -0.0001 | -0.0012 | -0.0003 | 0.00046 |
| 1.4E-05 | 0.00124 | -0.0005 | -0.0006 | 0.00026 | 0.00064 |
| 1.4E-05 | 0.00116 | -0.001  | -0.0003 | -0.0006 | 0.00107 |
| 1.4E-05 | 0.00085 | -0.0009 | -6E-05  | 0.00104 | 0.00025 |
| 1.4E-05 | 0.00088 | -0.0005 | -0.0002 | 0.00022 | 0.00076 |
| 1.4E-05 | 0.00131 | -0.0005 | -4E-05  | -0.0003 | 0.00024 |
| 1.4E-05 | 0.00088 | -0.0006 | -0.0001 | 9.8E-05 | 0.00061 |
| 1.4E-05 | 0.00069 | -0.0003 | -5E-05  | -2E-05  | 5.1E-05 |
| 1.4E-05 | 0.00125 | -0.0002 | 5.8E-05 | 0.00067 | 0.00106 |
| 1.4E-05 | 0.0004  | -0.0006 | 0.00024 | -0.0001 | 5.9E-06 |
| 1.4E-05 | 0.00045 | -0.0004 | -0.0002 | 0.00016 | 0.00093 |
| 1.4E-05 | -0.0003 | -0.0002 | -0.0011 | 0.00049 | 0.00153 |

|         |         |         |         |         |         |
|---------|---------|---------|---------|---------|---------|
| 1.4E-05 | 0.00075 | -0.0007 | -0.0007 | 0.00057 | 0.00081 |
| 1.4E-05 | 0.00134 | 8.2E-05 | -0.0006 | 0.00072 | 0.00063 |
| 1.4E-05 | 0.00117 | -0.0003 | -0.0003 | -5E-06  | 0.00109 |
| 1.5E-05 | 0.00055 | 0.00012 | -2E-05  | 9.5E-05 | 0.00109 |
| 1.5E-05 | 0.0009  | 0.00037 | 0.00016 | 0.00092 | 0.00062 |
| 1.5E-05 | -1E-05  | 0.00042 | 0.00018 | -0.0003 | 0.00047 |
| 1.5E-05 | 0.00079 | -0.0002 | -0.0001 | 0.0006  | 0.00131 |
| 1.5E-05 | 0.00129 | -0.0013 | 0.00053 | 0.0004  | 0.00134 |
| 1.5E-05 | -0.0001 | -0.001  | -0.0005 | 0.00035 | 0.00126 |
| 1.5E-05 | 0.00085 | -0.0003 | -3E-05  | -0.0004 | 0.00075 |
| 1.5E-05 | 0.00133 | -0.0008 | -7E-05  | -0.0003 | 0.00101 |
| 1.5E-05 | 0.00087 | -0.0001 | -0.0002 | -0.0002 | 0.00165 |
| 1.5E-05 | 0.00024 | -0.0007 | 7.9E-05 | 0.00053 | 0.00072 |
| 1.5E-05 | 0.00034 | -0.0002 | -0.0002 | 0.00082 | 0.00043 |
| 1.5E-05 | 0.00028 | -0.0007 | -0.0007 | -0.0008 | 0.00084 |
| 1.5E-05 | 0.00039 | 0.00018 | -0.0007 | 0.00019 | 0.00108 |
| 1.5E-05 | 0.0005  | -0.0005 | -0.0002 | -0.0003 | 0.00053 |
| 1.5E-05 | 1.9E-05 | 9E-05   | -6E-05  | -2E-06  | 0.00085 |
| 1.5E-05 | -0.0002 | -0.0004 | -0.0003 | 0.00067 | 0.00056 |

**Table SI.19:** Primary kinetic data for the reaction of succinimide (**S19**) with CumO• generated by 355 nm LFP in DMSO (**Figure SI.19**).

| t / s   | $\Delta A$ succinimide ( <b>S19</b> ) |         |
|---------|---------------------------------------|---------|
|         | 0.105M                                | 1.4M    |
| -1E-06  | 0.00048                               | -0.0005 |
| -1E-06  | 0.00117                               | -0.0003 |
| -9E-07  | 0.00117                               | -0.0006 |
| -9E-07  | 0.00063                               | -3E-05  |
| -9E-07  | 0.00059                               | -0.0004 |
| -8E-07  | 0.00166                               | -0.001  |
| -8E-07  | 0.00217                               | -0.0002 |
| -8E-07  | 0.00074                               | -0.0002 |
| -7E-07  | 0.00053                               | -0.0005 |
| -7E-07  | 0.0012                                | -0.0012 |
| -7E-07  | 0.00103                               | -0.0014 |
| -6E-07  | 0.00062                               | -0.0014 |
| -6E-07  | 0.00128                               | -0.001  |
| -6E-07  | 0.00093                               | -0.0009 |
| -5E-07  | 0.00097                               | -0.0005 |
| -5E-07  | 0.00099                               | -0.0004 |
| -5E-07  | 0.00128                               | -0.0012 |
| -4E-07  | 0.00123                               | -0.0008 |
| -4E-07  | 0.00066                               | -0.0002 |
| -4E-07  | -1E-06                                | -0.0001 |
| -4E-07  | 0.00096                               | -0.0006 |
| -3E-07  | 0.0005                                | 4.3E-05 |
| -3E-07  | 0.0004                                | -0.0003 |
| -3E-07  | 0.00051                               | -0.0006 |
| -2E-07  | 0.0003                                | 8.1E-05 |
| -2E-07  | 0.00132                               | -0.0002 |
| -2E-07  | 0.00133                               | -0.0005 |
| -1E-07  | 0.00132                               | -0.0003 |
| -1E-07  | 0.00085                               | -0.0005 |
| -6E-08  | 0.00178                               | -0.0009 |
| -3E-08  | 0.00086                               | -0.0004 |
| -2E-10  | -0.002                                | -0.0053 |
| 3.2E-08 | -0.0112                               | -0.022  |
| 6.4E-08 | 0.02184                               | -0.0145 |
| 9.6E-08 | 0.02557                               | 0.01667 |
| 1.3E-07 | 0.02602                               | 0.01955 |
| 1.6E-07 | 0.02415                               | 0.01918 |
| 1.9E-07 | 0.02396                               | 0.0187  |
| 2.2E-07 | 0.02297                               | 0.01703 |
| 2.6E-07 | 0.02278                               | 0.01631 |
| 2.9E-07 | 0.02274                               | 0.01585 |
| 3.2E-07 | 0.02265                               | 0.01542 |
| 3.5E-07 | 0.02102                               | 0.0153  |
| 3.8E-07 | 0.02099                               | 0.01484 |
| 4.2E-07 | 0.02061                               | 0.01512 |
| 4.5E-07 | 0.01958                               | 0.01445 |
| 4.8E-07 | 0.01938                               | 0.01317 |
| 5.1E-07 | 0.01874                               | 0.01262 |
| 5.4E-07 | 0.01838                               | 0.01361 |

|         |         |         |
|---------|---------|---------|
| 5.8E-07 | 0.01788 | 0.01231 |
| 6.1E-07 | 0.01798 | 0.01199 |
| 6.4E-07 | 0.01788 | 0.01156 |
| 6.7E-07 | 0.01695 | 0.01144 |
| 7E-07   | 0.01713 | 0.0105  |
| 7.4E-07 | 0.01585 | 0.01076 |
| 7.7E-07 | 0.01626 | 0.01006 |
| 8E-07   | 0.01533 | 0.01032 |
| 8.3E-07 | 0.0139  | 0.00944 |
| 8.6E-07 | 0.01421 | 0.01068 |
| 9E-07   | 0.01454 | 0.01035 |
| 9.3E-07 | 0.01357 | 0.00995 |
| 9.6E-07 | 0.0128  | 0.00868 |
| 9.9E-07 | 0.01349 | 0.00855 |
| 1E-06   | 0.01269 | 0.00808 |
| 1.1E-06 | 0.01263 | 0.00813 |
| 1.1E-06 | 0.01239 | 0.00803 |
| 1.1E-06 | 0.01254 | 0.00776 |
| 1.2E-06 | 0.01243 | 0.00851 |
| 1.2E-06 | 0.01207 | 0.00839 |
| 1.2E-06 | 0.01267 | 0.00719 |
| 1.2E-06 | 0.01096 | 0.00718 |
| 1.3E-06 | 0.01038 | 0.00689 |
| 1.3E-06 | 0.01101 | 0.00782 |
| 1.3E-06 | 0.01036 | 0.00707 |
| 1.4E-06 | 0.01058 | 0.00728 |
| 1.4E-06 | 0.0097  | 0.00661 |
| 1.4E-06 | 0.01026 | 0.00641 |
| 1.5E-06 | 0.01036 | 0.00635 |
| 1.5E-06 | 0.00968 | 0.00606 |
| 1.5E-06 | 0.01041 | 0.00592 |
| 1.6E-06 | 0.00944 | 0.00592 |
| 1.6E-06 | 0.00887 | 0.00634 |
| 1.6E-06 | 0.00858 | 0.00548 |
| 1.7E-06 | 0.00851 | 0.00537 |
| 1.7E-06 | 0.00881 | 0.00673 |
| 1.7E-06 | 0.00811 | 0.00619 |
| 1.8E-06 | 0.00825 | 0.00583 |
| 1.8E-06 | 0.00824 | 0.00557 |
| 1.8E-06 | 0.00748 | 0.00537 |
| 1.9E-06 | 0.0085  | 0.00478 |
| 1.9E-06 | 0.00803 | 0.00463 |
| 1.9E-06 | 0.00819 | 0.00497 |
| 2E-06   | 0.00771 | 0.0052  |
| 2E-06   | 0.00751 | 0.00394 |
| 2E-06   | 0.00738 | 0.00446 |
| 2E-06   | 0.00778 | 0.00428 |
| 2.1E-06 | 0.0075  | 0.00431 |
| 2.1E-06 | 0.00693 | 0.00533 |
| 2.1E-06 | 0.0073  | 0.00418 |
| 2.2E-06 | 0.00777 | 0.00421 |
| 2.2E-06 | 0.00739 | 0.00322 |
| 2.2E-06 | 0.00716 | 0.0039  |
| 2.3E-06 | 0.0066  | 0.00464 |

|         |         |         |
|---------|---------|---------|
| 2.3E-06 | 0.00633 | 0.00443 |
| 2.3E-06 | 0.00665 | 0.00376 |
| 2.4E-06 | 0.00658 | 0.00404 |
| 2.4E-06 | 0.00588 | 0.0038  |
| 2.4E-06 | 0.00555 | 0.00404 |
| 2.5E-06 | 0.00629 | 0.00383 |
| 2.5E-06 | 0.00561 | 0.00368 |
| 2.5E-06 | 0.00619 | 0.00369 |
| 2.6E-06 | 0.00564 | 0.0036  |
| 2.6E-06 | 0.00622 | 0.00372 |
| 2.6E-06 | 0.00537 | 0.00361 |
| 2.7E-06 | 0.00493 | 0.00275 |
| 2.7E-06 | 0.00557 | 0.00307 |
| 2.7E-06 | 0.0058  | 0.00329 |
| 2.8E-06 | 0.00569 | 0.00267 |
| 2.8E-06 | 0.00516 | 0.00341 |
| 2.8E-06 | 0.00565 | 0.00257 |
| 2.8E-06 | 0.00586 | 0.0033  |
| 2.9E-06 | 0.00443 | 0.00274 |
| 2.9E-06 | 0.00476 | 0.00357 |
| 2.9E-06 | 0.00481 | 0.003   |
| 3E-06   | 0.00455 | 0.00308 |
| 3E-06   | 0.00391 | 0.00297 |
| 3E-06   | 0.00396 | 0.00255 |
| 3.1E-06 | 0.0049  | 0.00342 |
| 3.1E-06 | 0.00512 | 0.00231 |
| 3.1E-06 | 0.00356 | 0.00253 |
| 3.2E-06 | 0.00384 | 0.0031  |
| 3.2E-06 | 0.004   | 0.00306 |
| 3.2E-06 | 0.00404 | 0.00253 |
| 3.3E-06 | 0.0045  | 0.00256 |
| 3.3E-06 | 0.00461 | 0.00268 |
| 3.3E-06 | 0.00386 | 0.00351 |
| 3.4E-06 | 0.00356 | 0.00288 |
| 3.4E-06 | 0.004   | 0.0027  |
| 3.4E-06 | 0.00394 | 0.00233 |
| 3.5E-06 | 0.00348 | 0.00307 |
| 3.5E-06 | 0.0037  | 0.00271 |
| 3.5E-06 | 0.00414 | 0.00212 |
| 3.6E-06 | 0.00382 | 0.0023  |
| 3.6E-06 | 0.00415 | 0.00206 |
| 3.6E-06 | 0.00367 | 0.00165 |
| 3.6E-06 | 0.00366 | 0.00194 |
| 3.7E-06 | 0.00323 | 0.00187 |
| 3.7E-06 | 0.00384 | 0.00184 |
| 3.7E-06 | 0.00403 | 0.00269 |
| 3.8E-06 | 0.00363 | 0.00183 |
| 3.8E-06 | 0.00352 | 0.0018  |
| 3.8E-06 | 0.0036  | 0.00242 |
| 3.9E-06 | 0.0033  | 0.00205 |
| 3.9E-06 | 0.00359 | 0.00203 |
| 3.9E-06 | 0.00383 | 0.00196 |
| 4E-06   | 0.00395 | 0.00142 |
| 4E-06   | 0.00351 | 0.00159 |



|         |         |         |
|---------|---------|---------|
| 4E-06   | 0.0033  | 0.00155 |
| 4.1E-06 | 0.00343 | 0.00108 |
| 4.1E-06 | 0.00425 | 0.00158 |
| 4.1E-06 | 0.00325 | 0.00126 |
| 4.2E-06 | 0.00342 | 0.00166 |
| 4.2E-06 | 0.00348 | 0.00145 |
| 4.2E-06 | 0.00266 | 0.0015  |
| 4.3E-06 | 0.0031  | 0.00152 |
| 4.3E-06 | 0.00301 | 0.00166 |
| 4.3E-06 | 0.00384 | 0.00181 |
| 4.4E-06 | 0.00321 | 0.00218 |
| 4.4E-06 | 0.0035  | 0.00165 |
| 4.4E-06 | 0.003   | 0.0016  |
| 4.4E-06 | 0.00297 | 0.00195 |
| 4.5E-06 | 0.00329 | 0.00192 |
| 4.5E-06 | 0.00284 | 0.00162 |
| 4.5E-06 | 0.00327 | 0.00126 |
| 4.6E-06 | 0.00314 | 0.00234 |
| 4.6E-06 | 0.0034  | 0.00153 |
| 4.6E-06 | 0.00328 | 0.00187 |
| 4.7E-06 | 0.00328 | 0.00135 |
| 4.7E-06 | 0.003   | 0.00181 |
| 4.7E-06 | 0.00312 | 0.00178 |
| 4.8E-06 | 0.00294 | 0.0019  |
| 4.8E-06 | 0.00318 | 0.00141 |
| 4.8E-06 | 0.00373 | 0.00107 |
| 4.9E-06 | 0.0031  | 0.00113 |
| 4.9E-06 | 0.00364 | 0.00157 |
| 4.9E-06 | 0.00373 | 0.00195 |
| 5E-06   | 0.00354 | 0.00151 |
| 5E-06   | 0.00345 | 0.00236 |
| 5E-06   | 0.00325 | 0.00213 |
| 5.1E-06 | 0.00306 | 0.00185 |
| 5.1E-06 | 0.0033  | 0.00148 |
| 5.1E-06 | 0.00285 | 0.00173 |
| 5.2E-06 | 0.00266 | 0.0018  |
| 5.2E-06 | 0.00313 | 0.00191 |
| 5.2E-06 | 0.00245 | 0.00137 |
| 5.2E-06 | 0.0029  | 0.00109 |
| 5.3E-06 | 0.00232 | 0.00242 |
| 5.3E-06 | 0.00356 | 0.00124 |
| 5.3E-06 | 0.00286 | 0.00171 |
| 5.4E-06 | 0.00365 | 0.00129 |
| 5.4E-06 | 0.00325 | 0.00154 |
| 5.4E-06 | 0.00306 | 0.00144 |
| 5.5E-06 | 0.00298 | 0.00141 |
| 5.5E-06 | 0.00293 | 0.00149 |
| 5.5E-06 | 0.00311 | 0.00165 |
| 5.6E-06 | 0.00286 | 0.00129 |
| 5.6E-06 | 0.00336 | 0.00114 |
| 5.6E-06 | 0.00326 | 0.00209 |
| 5.7E-06 | 0.00326 | 0.00122 |
| 5.7E-06 | 0.00315 | 0.00108 |
| 5.7E-06 | 0.00264 | 0.00109 |

|         |         |         |
|---------|---------|---------|
| 5.8E-06 | 0.00326 | 0.00082 |
| 5.8E-06 | 0.00308 | 0.00171 |
| 5.8E-06 | 0.00279 | 0.00066 |
| 5.9E-06 | 0.00257 | 0.001   |
| 5.9E-06 | 0.00293 | 0.001   |
| 5.9E-06 | 0.00288 | 0.00139 |
| 6E-06   | 0.00289 | 0.00085 |
| 6E-06   | 0.00374 | 0.00135 |
| 6E-06   | 0.0026  | 0.00067 |
| 6E-06   | 0.00273 | 0.00092 |
| 6.1E-06 | 0.00291 | 0.00263 |
| 6.1E-06 | 0.00294 | 0.00204 |
| 6.1E-06 | 0.003   | 0.00218 |
| 6.2E-06 | 0.0033  | 0.00158 |
| 6.2E-06 | 0.00281 | 0.00163 |
| 6.2E-06 | 0.00302 | 0.00171 |
| 6.3E-06 | 0.00312 | 0.00142 |
| 6.3E-06 | 0.00345 | 0.00134 |
| 6.3E-06 | 0.00344 | 0.00196 |
| 6.4E-06 | 0.00244 | 0.00107 |
| 6.4E-06 | 0.00276 | 0.00109 |
| 6.4E-06 | 0.00176 | 0.00174 |
| 6.5E-06 | 0.00335 | 0.00173 |
| 6.5E-06 | 0.003   | 0.00138 |
| 6.5E-06 | 0.00315 | 0.00201 |
| 6.6E-06 | 0.00259 | 0.00102 |
| 6.6E-06 | 0.00225 | 0.00153 |
| 6.6E-06 | 0.00299 | 0.0009  |
| 6.7E-06 | 0.00258 | 0.00184 |
| 6.7E-06 | 0.00255 | 0.00169 |
| 6.7E-06 | 0.00242 | 0.0005  |
| 6.8E-06 | 0.00256 | 0.00138 |
| 6.8E-06 | 0.00307 | 0.00099 |
| 6.8E-06 | 0.00268 | 0.00102 |
| 6.8E-06 | 0.00297 | 0.00169 |
| 6.9E-06 | 0.00351 | 0.00182 |
| 6.9E-06 | 0.00336 | 0.00189 |
| 6.9E-06 | 0.00295 | 0.00168 |
| 7E-06   | 0.00268 | 0.00144 |
| 7E-06   | 0.003   | 0.00154 |
| 7E-06   | 0.00253 | 0.00129 |
| 7.1E-06 | 0.00291 | 0.00031 |
| 7.1E-06 | 0.00273 | 0.00133 |
| 7.1E-06 | 0.00325 | 0.00123 |
| 7.2E-06 | 0.00228 | 0.00138 |
| 7.2E-06 | 0.00359 | 0.00066 |
| 7.2E-06 | 0.00344 | 0.00015 |
| 7.3E-06 | 0.00268 | 0.00036 |
| 7.3E-06 | 0.0026  | 0.00146 |
| 7.3E-06 | 0.0027  | 0.00148 |
| 7.4E-06 | 0.00315 | 0.0017  |
| 7.4E-06 | 0.0029  | 0.001   |
| 7.4E-06 | 0.00272 | 0.00114 |
| 7.5E-06 | 0.00345 | 0.0009  |

|         |         |         |
|---------|---------|---------|
| 7.5E-06 | 0.00292 | 0.00083 |
| 7.5E-06 | 0.00308 | 0.00125 |
| 7.6E-06 | 0.00318 | 0.00182 |
| 7.6E-06 | 0.00296 | 0.00073 |
| 7.6E-06 | 0.00282 | 0.00186 |
| 7.6E-06 | 0.00326 | 0.00062 |
| 7.7E-06 | 0.00337 | 0.0016  |
| 7.7E-06 | 0.00244 | 0.00093 |
| 7.7E-06 | 0.00298 | 0.0006  |
| 7.8E-06 | 0.00264 | 0.00129 |
| 7.8E-06 | 0.00243 | 0.00038 |
| 7.8E-06 | 0.00295 | 0.00021 |
| 7.9E-06 | 0.00281 | 0.0008  |
| 7.9E-06 | 0.00278 | 0.00195 |
| 7.9E-06 | 0.00255 | 0.00141 |
| 8E-06   | 0.00235 | 0.00193 |
| 8E-06   | 0.00255 | 0.00105 |
| 8E-06   | 0.00291 | 0.00014 |
| 8.1E-06 | 0.00365 | 0.00074 |
| 8.1E-06 | 0.00251 | 0.00117 |
| 8.1E-06 | 0.0032  | 0.00152 |
| 8.2E-06 | 0.00363 | 0.00143 |
| 8.2E-06 | 0.00297 | 0.00128 |
| 8.2E-06 | 0.00259 | 0.00124 |
| 8.3E-06 | 0.00238 | 0.00112 |
| 8.3E-06 | 0.00295 | 0.00146 |
| 8.3E-06 | 0.00241 | 0.00097 |
| 8.4E-06 | 0.00236 | 0.00147 |
| 8.4E-06 | 0.00231 | 0.00077 |
| 8.4E-06 | 0.00233 | 0.0015  |
| 8.4E-06 | 0.00323 | 0.00184 |
| 8.5E-06 | 0.00268 | 0.00165 |
| 8.5E-06 | 0.00318 | 0.00098 |
| 8.5E-06 | 0.00288 | 0.00028 |
| 8.6E-06 | 0.00268 | 0.00171 |
| 8.6E-06 | 0.00264 | 0.0005  |
| 8.6E-06 | 0.00302 | 0.00139 |
| 8.7E-06 | 0.00277 | 0.00073 |
| 8.7E-06 | 0.00291 | 1E-04   |
| 8.7E-06 | 0.00234 | 0.00117 |
| 8.8E-06 | 0.00272 | 0.00037 |
| 8.8E-06 | 0.00232 | 0.00186 |
| 8.8E-06 | 0.00314 | 0.00138 |
| 8.9E-06 | 0.00246 | 0.00132 |
| 8.9E-06 | 0.00279 | 0.00085 |
| 8.9E-06 | 0.00296 | 0.00112 |
| 9E-06   | 0.00315 | 0.00106 |
| 9E-06   | 0.00304 | 0.00158 |
| 9E-06   | 0.00302 | 0.00096 |
| 9.1E-06 | 0.00285 | 0.00054 |
| 9.1E-06 | 0.003   | 0.00176 |
| 9.1E-06 | 0.003   | 0.00136 |
| 9.2E-06 | 0.00292 | 0.00162 |
| 9.2E-06 | 0.00288 | 0.00125 |

|         |         |         |
|---------|---------|---------|
| 9.2E-06 | 0.00301 | 0.00117 |
| 9.2E-06 | 0.00285 | 4.3E-05 |
| 9.3E-06 | 0.00281 | 0.00121 |
| 9.3E-06 | 0.00187 | 0.00126 |
| 9.3E-06 | 0.00242 | 0.0015  |
| 9.4E-06 | 0.00183 | 0.00108 |
| 9.4E-06 | 0.00226 | 0.00163 |
| 9.4E-06 | 0.00308 | 0.00115 |
| 9.5E-06 | 0.00363 | 0.00093 |
| 9.5E-06 | 0.00329 | 0.00161 |
| 9.5E-06 | 0.00225 | 0.0008  |
| 9.6E-06 | 0.00269 | 0.00161 |
| 9.6E-06 | 0.0024  | 0.00133 |
| 9.6E-06 | 0.00299 | 0.00101 |
| 9.7E-06 | 0.00239 | 0.00049 |
| 9.7E-06 | 0.00252 | 0.00149 |
| 9.7E-06 | 0.00274 | 0.0014  |
| 9.8E-06 | 0.00323 | 0.00117 |
| 9.8E-06 | 0.00282 | 0.00129 |
| 9.8E-06 | 0.00255 | 0.00014 |
| 9.9E-06 | 0.00259 | 0.00116 |
| 9.9E-06 | 0.00256 | 0.00199 |
| 9.9E-06 | 0.00272 | 0.00188 |
| 1E-05   | 0.00256 | 0.00106 |
| 1E-05   | 0.00283 | 0.00153 |
| 1E-05   | 0.00296 | 0.00047 |
| 1E-05   | 0.00299 | 0.00088 |
| 1E-05   | 0.00277 | 0.00122 |
| 1E-05   | 0.00239 | -0.0005 |
| 1E-05   | 0.00249 | 0.0009  |
| 1E-05   | 0.0024  | 0.00092 |
| 1E-05   | 0.00243 | 0.00117 |
| 1E-05   | 0.00259 | 0.00064 |
| 1E-05   | 0.00387 | 0.0014  |
| 1E-05   | 0.00279 | 0.00152 |
| 1E-05   | 0.00296 | 0.00098 |
| 1E-05   | 0.00266 | 0.00145 |
| 1E-05   | 0.00291 | 0.00142 |
| 1E-05   | 0.0026  | 0.00149 |
| 1E-05   | 0.00279 | 0.00127 |
| 1.1E-05 | 0.00305 | 0.00071 |
| 1.1E-05 | 0.00248 | 0.00048 |
| 1.1E-05 | 0.00277 | 0.00076 |
| 1.1E-05 | 0.00267 | 0.00065 |
| 1.1E-05 | 0.00237 | 0.00084 |
| 1.1E-05 | 0.00242 | 0.00114 |
| 1.1E-05 | 0.00298 | 0.00151 |
| 1.1E-05 | 0.00222 | 0.0018  |
| 1.1E-05 | 0.00257 | 0.00062 |
| 1.1E-05 | 0.00258 | 0.00108 |
| 1.1E-05 | 0.00262 | 0.00148 |
| 1.1E-05 | 0.0031  | 0.00184 |
| 1.1E-05 | 0.00238 | 0.00081 |
| 1.1E-05 | 0.00242 | 0.00119 |

|         |         |         |
|---------|---------|---------|
| 1.1E-05 | 0.00258 | 0.0017  |
| 1.1E-05 | 0.00321 | 0.00118 |
| 1.1E-05 | 0.00214 | 0.00032 |
| 1.1E-05 | 0.00098 | 0.00096 |
| 1.1E-05 | 0.00271 | 0.00099 |
| 1.1E-05 | 0.0025  | 0.00068 |
| 1.1E-05 | 0.00319 | 0.00079 |
| 1.1E-05 | 0.00274 | 0.00198 |
| 1.1E-05 | 0.00212 | 0.00096 |
| 1.1E-05 | 0.00262 | 0.00214 |
| 1.1E-05 | 0.00243 | 0.00094 |
| 1.1E-05 | 0.0023  | 0.00124 |
| 1.1E-05 | 0.00192 | 0.00028 |
| 1.1E-05 | 0.00216 | 0.00068 |
| 1.1E-05 | 0.00317 | 0.00107 |
| 1.1E-05 | 0.0029  | 0.00103 |
| 1.1E-05 | 0.00325 | 0.00103 |
| 1.1E-05 | 0.00295 | 0.00079 |
| 1.2E-05 | 0.00243 | 0.00076 |
| 1.2E-05 | 0.00268 | 0.00062 |
| 1.2E-05 | 0.00232 | 0.00154 |
| 1.2E-05 | 0.00218 | 0.00107 |
| 1.2E-05 | 0.00215 | 0.00039 |
| 1.2E-05 | 0.00202 | 0.00133 |
| 1.2E-05 | 0.00185 | 0.00125 |
| 1.2E-05 | 0.0017  | 0.00115 |
| 1.2E-05 | 0.00242 | 0.00091 |
| 1.2E-05 | 0.00312 | 0.00112 |
| 1.2E-05 | 0.00341 | 0.00046 |
| 1.2E-05 | 0.00316 | 0.00148 |
| 1.2E-05 | 0.00153 | 0.00111 |
| 1.2E-05 | 0.00189 | 0.00103 |
| 1.2E-05 | 0.00251 | 0.00048 |
| 1.2E-05 | 0.00262 | 0.00078 |
| 1.2E-05 | 0.002   | 0.00043 |
| 1.2E-05 | 0.00211 | 0.00152 |
| 1.2E-05 | 0.00247 | 0.00164 |
| 1.2E-05 | 0.00208 | 0.00161 |
| 1.2E-05 | 0.00295 | 0.00058 |
| 1.2E-05 | 0.00333 | 0.00195 |
| 1.2E-05 | 0.00262 | 0.00052 |
| 1.2E-05 | 0.00175 | 0.00115 |
| 1.2E-05 | 0.00237 | 0.0005  |
| 1.2E-05 | 0.003   | 0.00111 |
| 1.2E-05 | 0.00303 | 0.00077 |
| 1.2E-05 | 0.00246 | 0.00063 |
| 1.2E-05 | 0.00282 | 0.00127 |
| 1.2E-05 | 0.00311 | 0.00109 |
| 1.2E-05 | 0.00273 | 0.0011  |
| 1.3E-05 | 0.00313 | 0.00071 |
| 1.3E-05 | 0.00284 | 0.00068 |
| 1.3E-05 | 0.00202 | 0.00051 |
| 1.3E-05 | 0.00256 | 0.00059 |
| 1.3E-05 | 0.0028  | 0.00107 |

|         |         |         |
|---------|---------|---------|
| 1.3E-05 | 0.00217 | 0.0004  |
| 1.3E-05 | 0.00271 | 0.00064 |
| 1.3E-05 | 0.00246 | 0.0014  |
| 1.3E-05 | 0.00309 | 0.00127 |
| 1.3E-05 | 0.00307 | 0.00083 |
| 1.3E-05 | 0.00291 | 0.00039 |
| 1.3E-05 | 0.0031  | 0.00179 |
| 1.3E-05 | 0.00275 | 0.00074 |
| 1.3E-05 | 0.00206 | 0.00061 |
| 1.3E-05 | 0.00235 | 0.00107 |
| 1.3E-05 | 0.0022  | 0.00113 |
| 1.3E-05 | 0.00234 | 0.00151 |
| 1.3E-05 | 0.00206 | 0.00138 |
| 1.3E-05 | 0.00327 | 0.00059 |
| 1.3E-05 | 0.00286 | 0.00033 |
| 1.3E-05 | 0.00357 | 0.00088 |
| 1.3E-05 | 0.00229 | 0.00065 |
| 1.3E-05 | 0.003   | 0.00101 |
| 1.3E-05 | 0.00224 | 0.0011  |
| 1.3E-05 | 0.00199 | 0.00051 |
| 1.3E-05 | 0.00315 | 0.00087 |
| 1.3E-05 | 0.00304 | 0.00109 |
| 1.3E-05 | 0.00192 | 0.00129 |
| 1.3E-05 | 0.0022  | 0.00112 |
| 1.3E-05 | 0.00215 | 0.00083 |
| 1.3E-05 | 0.00219 | 0.00084 |
| 1.4E-05 | 0.00244 | 0.00054 |
| 1.4E-05 | 0.0028  | 0.00114 |
| 1.4E-05 | 0.00286 | 0.0003  |
| 1.4E-05 | 0.00222 | 0.00127 |
| 1.4E-05 | 0.00243 | 0.00089 |
| 1.4E-05 | 0.00233 | 0.00122 |
| 1.4E-05 | 0.00271 | 0.00055 |
| 1.4E-05 | 0.00223 | 0.00062 |
| 1.4E-05 | 0.00243 | 0.00085 |
| 1.4E-05 | 0.00297 | 0.00194 |
| 1.4E-05 | 0.00271 | 0.00046 |
| 1.4E-05 | 0.00269 | 0.00042 |
| 1.4E-05 | 0.00296 | 0.00088 |
| 1.4E-05 | 0.00212 | 0.0012  |
| 1.4E-05 | 0.00352 | 0.00124 |
| 1.4E-05 | 0.00277 | 0.0014  |
| 1.4E-05 | 0.00283 | 0.00084 |
| 1.4E-05 | 0.00255 | 0.00097 |
| 1.4E-05 | 0.00236 | 0.0004  |
| 1.4E-05 | 0.0027  | 0.00024 |
| 1.4E-05 | 0.00295 | 0.00042 |
| 1.4E-05 | 0.00172 | 0.00109 |
| 1.4E-05 | 0.00267 | 0.00101 |
| 1.4E-05 | 0.00223 | 0.00031 |
| 1.4E-05 | 0.00234 | -5E-05  |
| 1.4E-05 | 0.00266 | -0.0004 |
| 1.4E-05 | 0.00182 | 0.00052 |
| 1.4E-05 | 0.00255 | 0.00137 |

|         |         |         |
|---------|---------|---------|
| 1.4E-05 | 0.00295 | 0.00033 |
| 1.4E-05 | 0.00216 | 0.00049 |
| 1.4E-05 | 0.00202 | 0.00055 |
| 1.5E-05 | 0.0024  | 0.00087 |
| 1.5E-05 | 0.00256 | 0.0015  |
| 1.5E-05 | 0.00206 | 0.00064 |
| 1.5E-05 | 0.00242 | 0.00131 |
| 1.5E-05 | 0.00228 | 0.00075 |
| 1.5E-05 | 0.00208 | 0.00038 |
| 1.5E-05 | 0.00192 | 0.00048 |
| 1.5E-05 | 0.00262 | 0.00097 |
| 1.5E-05 | 0.00255 | 0.00071 |
| 1.5E-05 | 0.00172 | 0.00114 |
| 1.5E-05 | 0.00277 | 0.00082 |
| 1.5E-05 | 0.00197 | 0.00065 |
| 1.5E-05 | 0.00265 | 0.00147 |
| 1.5E-05 | 0.00305 | 0.00074 |
| 1.5E-05 | 0.00297 | 0.00073 |
| 1.5E-05 | 0.00208 | 0.00069 |

**Table SI.20:** Primary kinetic data for the reaction of *N*-methylsuccinimide (S20) with CumO• generated by 355 nm LFP in MeCN (**Figure SI.20**).

| t / s   | $\Delta A$ <i>N</i> -methylsuccinimide (S20) |         |         |         |
|---------|----------------------------------------------|---------|---------|---------|
|         | 0.196M                                       | 0.98M   | 2.0M    | 3.0M    |
| -1E-06  | -8E-05                                       | -0.0002 | 7E-05   | -0.0001 |
| -1E-06  | 0.00043                                      | -0.0002 | 0.00078 | 0.00051 |
| -9E-07  | -1E-05                                       | 0.00034 | 0.00011 | 0.00036 |
| -9E-07  | 0.00017                                      | -0.0002 | 0.00081 | -0.0013 |
| -9E-07  | -1E-05                                       | -0.0003 | 0.00041 | 0.00017 |
| -8E-07  | -0.0004                                      | -0.0009 | 0.00024 | -0.0006 |
| -8E-07  | -0.0006                                      | 0.00039 | 0.00097 | -5E-05  |
| -8E-07  | 0.0002                                       | 0.00031 | 0.00035 | -0.0002 |
| -7E-07  | -8E-05                                       | -5E-05  | 0.00039 | -0.0004 |
| -7E-07  | 0.00014                                      | -0.0003 | 0.00013 | -0.0008 |
| -7E-07  | -0.0002                                      | -0.0003 | 0.0006  | 0.00026 |
| -6E-07  | -0.0004                                      | -0.0003 | 0.0007  | -0.0002 |
| -6E-07  | -0.0006                                      | -0.0004 | 0.00045 | -0.0005 |
| -6E-07  | -0.0005                                      | -0.0004 | 0.00013 | 0.00016 |
| -5E-07  | -0.0001                                      | 0.00054 | 0.00054 | 0.00027 |
| -5E-07  | -0.0006                                      | -0.0001 | 0.00057 | 6.6E-05 |
| -5E-07  | -0.0002                                      | -9E-05  | -5E-05  | -0.0001 |
| -4E-07  | -1E-05                                       | 0.00042 | 0.00076 | 1.2E-05 |
| -4E-07  | -0.0005                                      | -3E-05  | 0.00104 | 0.00014 |
| -4E-07  | -0.0006                                      | -0.0008 | 0.00072 | 0.00052 |
| -4E-07  | 6.9E-05                                      | -8E-05  | 0.00117 | 0.00035 |
| -3E-07  | -0.0002                                      | 0.00013 | -0.0003 | 2.1E-05 |
| -3E-07  | -0.0005                                      | 0.00042 | 0.00048 | -0.0001 |
| -3E-07  | -6E-05                                       | -7E-05  | -0.0006 | 0.00046 |
| -2E-07  | -0.0001                                      | -0.0003 | -0.0001 | -2E-05  |
| -2E-07  | 6.6E-05                                      | -0.0001 | 0.00055 | 0.00031 |
| -2E-07  | -4E-06                                       | -0.0001 | 0.00033 | -0.0004 |
| -1E-07  | -0.0003                                      | -0.0004 | 9.9E-05 | 0.00044 |
| -1E-07  | -0.0002                                      | -0.0008 | 0.00048 | 0.00041 |
| -6E-08  | -8E-05                                       | 0.00016 | 0.00067 | -0.0007 |
| -3E-08  | -0.0002                                      | 0.00043 | 0.00062 | -0.0007 |
| -2E-10  | -0.0026                                      | -0.0035 | -0.003  | -0.0034 |
| 3.2E-08 | -0.0099                                      | -0.0188 | -0.0174 | -0.0164 |
| 6.4E-08 | 0.02477                                      | 0.01876 | 0.01048 | 0.00062 |
| 9.6E-08 | 0.02909                                      | 0.02933 | 0.02909 | 0.02881 |
| 1.3E-07 | 0.02972                                      | 0.02851 | 0.03156 | 0.03029 |
| 1.6E-07 | 0.02782                                      | 0.02723 | 0.02968 | 0.0279  |
| 1.9E-07 | 0.02588                                      | 0.02698 | 0.02828 | 0.0272  |
| 2.2E-07 | 0.02586                                      | 0.02673 | 0.02746 | 0.02766 |
| 2.6E-07 | 0.02539                                      | 0.02545 | 0.02628 | 0.02562 |
| 2.9E-07 | 0.02417                                      | 0.02384 | 0.02563 | 0.02438 |
| 3.2E-07 | 0.02384                                      | 0.02424 | 0.02425 | 0.02302 |
| 3.5E-07 | 0.02335                                      | 0.02273 | 0.02317 | 0.02162 |
| 3.8E-07 | 0.02228                                      | 0.02202 | 0.02319 | 0.02062 |
| 4.2E-07 | 0.02249                                      | 0.02135 | 0.02141 | 0.02018 |
| 4.5E-07 | 0.02163                                      | 0.02033 | 0.02058 | 0.02042 |
| 4.8E-07 | 0.02087                                      | 0.02103 | 0.0211  | 0.02    |
| 5.1E-07 | 0.01982                                      | 0.01972 | 0.01982 | 0.01907 |
| 5.4E-07 | 0.0208                                       | 0.01935 | 0.01979 | 0.01879 |



|         |         |         |         |         |
|---------|---------|---------|---------|---------|
| 5.8E-07 | 0.01912 | 0.01926 | 0.01875 | 0.01739 |
| 6.1E-07 | 0.01867 | 0.01868 | 0.01804 | 0.01682 |
| 6.4E-07 | 0.01782 | 0.01734 | 0.01722 | 0.01689 |
| 6.7E-07 | 0.01758 | 0.01723 | 0.01733 | 0.01656 |
| 7E-07   | 0.01694 | 0.01747 | 0.01698 | 0.01551 |
| 7.4E-07 | 0.01691 | 0.01617 | 0.01623 | 0.01493 |
| 7.7E-07 | 0.01628 | 0.01654 | 0.01603 | 0.01462 |
| 8E-07   | 0.01671 | 0.01596 | 0.01523 | 0.01403 |
| 8.3E-07 | 0.01625 | 0.0153  | 0.01505 | 0.01431 |
| 8.6E-07 | 0.01526 | 0.01456 | 0.01498 | 0.01313 |
| 9E-07   | 0.01511 | 0.01366 | 0.01433 | 0.01287 |
| 9.3E-07 | 0.01416 | 0.01361 | 0.01403 | 0.01283 |
| 9.6E-07 | 0.01467 | 0.01388 | 0.01287 | 0.01261 |
| 9.9E-07 | 0.01481 | 0.01286 | 0.01325 | 0.01149 |
| 1E-06   | 0.0144  | 0.01308 | 0.01323 | 0.01095 |
| 1.1E-06 | 0.01309 | 0.01283 | 0.01317 | 0.01085 |
| 1.1E-06 | 0.01262 | 0.01289 | 0.01296 | 0.01057 |
| 1.1E-06 | 0.01285 | 0.01083 | 0.01235 | 0.01125 |
| 1.2E-06 | 0.0122  | 0.01174 | 0.01241 | 0.01055 |
| 1.2E-06 | 0.01242 | 0.0115  | 0.01158 | 0.01098 |
| 1.2E-06 | 0.01239 | 0.01161 | 0.01167 | 0.01019 |
| 1.2E-06 | 0.01122 | 0.01102 | 0.01112 | 0.01029 |
| 1.3E-06 | 0.01158 | 0.01089 | 0.01178 | 0.00951 |
| 1.3E-06 | 0.01037 | 0.01031 | 0.01135 | 0.00966 |
| 1.3E-06 | 0.01139 | 0.01056 | 0.0109  | 0.00889 |
| 1.4E-06 | 0.01048 | 0.01026 | 0.0104  | 0.0093  |
| 1.4E-06 | 0.01111 | 0.00992 | 0.01065 | 0.00925 |
| 1.4E-06 | 0.01033 | 0.00916 | 0.00969 | 0.00904 |
| 1.5E-06 | 0.01027 | 0.00899 | 0.00939 | 0.00851 |
| 1.5E-06 | 0.00982 | 0.00867 | 0.00997 | 0.00913 |
| 1.5E-06 | 0.00941 | 0.00896 | 0.00936 | 0.00825 |
| 1.6E-06 | 0.00955 | 0.00922 | 0.00876 | 0.0087  |
| 1.6E-06 | 0.0088  | 0.00946 | 0.00857 | 0.00852 |
| 1.6E-06 | 0.00945 | 0.00845 | 0.00927 | 0.00844 |
| 1.7E-06 | 0.00889 | 0.0087  | 0.00895 | 0.00828 |
| 1.7E-06 | 0.00912 | 0.00822 | 0.00903 | 0.00777 |
| 1.7E-06 | 0.00863 | 0.00799 | 0.0082  | 0.00733 |
| 1.8E-06 | 0.00766 | 0.00832 | 0.00845 | 0.00758 |
| 1.8E-06 | 0.00792 | 0.008   | 0.00848 | 0.00757 |
| 1.8E-06 | 0.00782 | 0.00742 | 0.00816 | 0.00579 |
| 1.9E-06 | 0.00758 | 0.0068  | 0.00762 | 0.00671 |
| 1.9E-06 | 0.00796 | 0.00649 | 0.00704 | 0.00695 |
| 1.9E-06 | 0.00731 | 0.00784 | 0.00757 | 0.0069  |
| 2E-06   | 0.00769 | 0.00649 | 0.00788 | 0.00703 |
| 2E-06   | 0.00633 | 0.00619 | 0.0075  | 0.00658 |
| 2E-06   | 0.00736 | 0.00702 | 0.0072  | 0.00641 |
| 2E-06   | 0.00632 | 0.00658 | 0.00745 | 0.00607 |
| 2.1E-06 | 0.00664 | 0.00637 | 0.00694 | 0.0063  |
| 2.1E-06 | 0.00689 | 0.00618 | 0.00721 | 0.00586 |
| 2.1E-06 | 0.00588 | 0.00612 | 0.0067  | 0.0061  |
| 2.2E-06 | 0.00679 | 0.00588 | 0.00687 | 0.00617 |
| 2.2E-06 | 0.00656 | 0.00647 | 0.00675 | 0.00525 |
| 2.2E-06 | 0.00576 | 0.00556 | 0.00686 | 0.00612 |
| 2.3E-06 | 0.00611 | 0.00573 | 0.00662 | 0.00571 |

|         |         |         |         |         |
|---------|---------|---------|---------|---------|
| 2.3E-06 | 0.00525 | 0.00548 | 0.00649 | 0.00509 |
| 2.3E-06 | 0.00603 | 0.00558 | 0.00612 | 0.00532 |
| 2.4E-06 | 0.00608 | 0.00533 | 0.00604 | 0.00566 |
| 2.4E-06 | 0.00547 | 0.00527 | 0.00518 | 0.00517 |
| 2.4E-06 | 0.00525 | 0.00494 | 0.00603 | 0.00461 |
| 2.5E-06 | 0.00512 | 0.00491 | 0.00543 | 0.00501 |
| 2.5E-06 | 0.00455 | 0.005   | 0.00516 | 0.00525 |
| 2.5E-06 | 0.00569 | 0.00485 | 0.00642 | 0.00454 |
| 2.6E-06 | 0.00501 | 0.00473 | 0.00566 | 0.00433 |
| 2.6E-06 | 0.00476 | 0.00448 | 0.00578 | 0.0042  |
| 2.6E-06 | 0.00511 | 0.00407 | 0.00538 | 0.00464 |
| 2.7E-06 | 0.00512 | 0.0045  | 0.00526 | 0.00492 |
| 2.7E-06 | 0.00499 | 0.00456 | 0.0043  | 0.00401 |
| 2.7E-06 | 0.00499 | 0.00535 | 0.00519 | 0.00493 |
| 2.8E-06 | 0.0043  | 0.0049  | 0.00526 | 0.00582 |
| 2.8E-06 | 0.00416 | 0.00418 | 0.0044  | 0.00365 |
| 2.8E-06 | 0.00439 | 0.00417 | 0.00528 | 0.00422 |
| 2.8E-06 | 0.00405 | 0.0039  | 0.00479 | 0.00451 |
| 2.9E-06 | 0.0041  | 0.00372 | 0.00488 | 0.00509 |
| 2.9E-06 | 0.00381 | 0.00419 | 0.00466 | 0.00426 |
| 2.9E-06 | 0.00419 | 0.00342 | 0.00438 | 0.00382 |
| 3E-06   | 0.00442 | 0.00327 | 0.00397 | 0.00404 |
| 3E-06   | 0.00356 | 0.00305 | 0.00466 | 0.00439 |
| 3E-06   | 0.00416 | 0.00284 | 0.00322 | 0.00435 |
| 3.1E-06 | 0.00387 | 0.00381 | 0.00493 | 0.00385 |
| 3.1E-06 | 0.00325 | 0.00283 | 0.00448 | 0.00333 |
| 3.1E-06 | 0.00436 | 0.00327 | 0.00393 | 0.00294 |
| 3.2E-06 | 0.0036  | 0.00291 | 0.00411 | 0.00315 |
| 3.2E-06 | 0.00334 | 0.00335 | 0.00439 | 0.00363 |
| 3.2E-06 | 0.00336 | 0.00284 | 0.0043  | 0.00355 |
| 3.3E-06 | 0.0031  | 0.00319 | 0.00329 | 0.00351 |
| 3.3E-06 | 0.0039  | 0.00274 | 0.00342 | 0.00303 |
| 3.3E-06 | 0.00288 | 0.00396 | 0.00435 | 0.00237 |
| 3.4E-06 | 0.00306 | 0.00335 | 0.00297 | 0.00308 |
| 3.4E-06 | 0.00315 | 0.00305 | 0.0032  | 0.00306 |
| 3.4E-06 | 0.00384 | 0.00291 | 0.00421 | 0.00346 |
| 3.5E-06 | 0.00329 | 0.00237 | 0.00373 | 0.00352 |
| 3.5E-06 | 0.00378 | 0.00273 | 0.0039  | 0.00294 |
| 3.5E-06 | 0.00205 | 0.00222 | 0.00402 | 0.00262 |
| 3.6E-06 | 0.00217 | 0.00209 | 0.00352 | 0.00279 |
| 3.6E-06 | 0.00206 | 0.0026  | 0.00391 | 0.00331 |
| 3.6E-06 | 0.0027  | 0.00284 | 0.00344 | 0.00424 |
| 3.6E-06 | 0.00248 | 0.00291 | 0.00327 | 0.00274 |
| 3.7E-06 | 0.00256 | 0.00233 | 0.0038  | 0.00302 |
| 3.7E-06 | 0.00269 | 0.00254 | 0.00341 | 0.00392 |
| 3.7E-06 | 0.0024  | 0.00257 | 0.00343 | 0.00269 |
| 3.8E-06 | 0.00182 | 0.00232 | 0.00304 | 0.00313 |
| 3.8E-06 | 0.00214 | 0.00282 | 0.00313 | 0.00299 |
| 3.8E-06 | 0.00252 | 0.00201 | 0.00371 | 0.00297 |
| 3.9E-06 | 0.00218 | 0.00199 | 0.00352 | 0.00317 |
| 3.9E-06 | 0.00281 | 0.00197 | 0.00214 | 0.00292 |
| 3.9E-06 | 0.00213 | 0.00239 | 0.00272 | 0.00323 |
| 4E-06   | 0.00253 | 0.00228 | 0.00325 | 0.00258 |
| 4E-06   | 0.00208 | 0.00198 | 0.00311 | 0.00279 |

|         |         |         |         |         |
|---------|---------|---------|---------|---------|
| 4E-06   | 0.00162 | 0.0017  | 0.00345 | 0.0022  |
| 4.1E-06 | 0.00237 | 0.00177 | 0.0019  | 0.00268 |
| 4.1E-06 | 0.0015  | 0.00241 | 0.00285 | 0.00199 |
| 4.1E-06 | 0.00201 | 0.00177 | 0.00358 | 0.00242 |
| 4.2E-06 | 0.00186 | 0.00236 | 0.00316 | 0.00276 |
| 4.2E-06 | 0.00213 | 0.00189 | 0.00249 | 0.00232 |
| 4.2E-06 | 0.00166 | 0.00291 | 0.00355 | 0.00236 |
| 4.3E-06 | 0.00182 | 0.00209 | 0.00283 | 0.00333 |
| 4.3E-06 | 0.00211 | 0.00261 | 0.0032  | 0.00235 |
| 4.3E-06 | 0.00162 | 0.00178 | 0.00311 | 0.00328 |
| 4.4E-06 | 0.00152 | 0.00154 | 0.00225 | 0.00273 |
| 4.4E-06 | 0.00176 | 0.00185 | 0.00352 | 0.00224 |
| 4.4E-06 | 0.0015  | 0.00189 | 0.00318 | 0.00205 |
| 4.4E-06 | 0.00187 | 0.00157 | 0.00341 | 0.00202 |
| 4.5E-06 | 0.00225 | 0.00166 | 0.00289 | 0.00317 |
| 4.5E-06 | 0.00192 | 0.00152 | 0.00336 | 0.00261 |
| 4.5E-06 | 0.00133 | 0.00186 | 0.00277 | 0.0022  |
| 4.6E-06 | 0.00089 | 0.00224 | 0.00224 | 0.00181 |
| 4.6E-06 | 0.00159 | 0.00143 | 0.00234 | 0.00168 |
| 4.6E-06 | 0.00093 | 0.00099 | 0.0022  | 0.00283 |
| 4.7E-06 | 0.00111 | 0.00196 | 0.00264 | 0.00222 |
| 4.7E-06 | 0.00139 | 0.00265 | 0.00265 | 0.00193 |
| 4.7E-06 | 0.00155 | 0.00156 | 0.00244 | 0.00233 |
| 4.8E-06 | 0.00146 | 0.00165 | 0.00256 | 0.00259 |
| 4.8E-06 | 0.00198 | 0.00205 | 0.00264 | 0.00221 |
| 4.8E-06 | 0.00136 | 0.00171 | 0.00313 | 0.00254 |
| 4.9E-06 | 0.00168 | 0.00175 | 0.00222 | 0.00238 |
| 4.9E-06 | 0.00119 | 0.00094 | 0.00252 | 0.00184 |
| 4.9E-06 | 0.0006  | 0.00152 | 0.00313 | 0.00185 |
| 5E-06   | 0.00139 | 0.00105 | 0.00297 | 0.00233 |
| 5E-06   | 0.00127 | 0.00108 | 0.00293 | 0.00171 |
| 5E-06   | 0.00094 | 0.00138 | 0.00268 | 0.00233 |
| 5.1E-06 | 0.00117 | 0.00173 | 0.00209 | 0.00215 |
| 5.1E-06 | 0.00091 | 0.00175 | 0.00177 | 0.00244 |
| 5.1E-06 | 0.00097 | 0.00144 | 0.00217 | 0.00276 |
| 5.2E-06 | 0.00154 | 0.00198 | 0.00236 | 0.00217 |
| 5.2E-06 | 0.00129 | 0.00039 | 0.00142 | 0.00182 |
| 5.2E-06 | 0.00121 | 0.00018 | 0.00203 | 0.00202 |
| 5.2E-06 | 0.00089 | 0.00174 | 0.00281 | 0.0019  |
| 5.3E-06 | 0.00136 | 0.00164 | 0.00259 | 0.00228 |
| 5.3E-06 | 0.00175 | 0.00176 | 0.00245 | 0.00215 |
| 5.3E-06 | 0.00123 | 0.00132 | 0.00186 | 0.00226 |
| 5.4E-06 | 0.00115 | 0.00155 | 0.00158 | 0.00209 |
| 5.4E-06 | 0.00123 | 0.0009  | 0.00147 | 0.00204 |
| 5.4E-06 | 0.0014  | 0.00164 | 0.00127 | 0.00264 |
| 5.5E-06 | 0.0002  | 0.00104 | 0.0021  | 0.00197 |
| 5.5E-06 | 0.00156 | 0.00125 | 0.00233 | 0.00197 |
| 5.5E-06 | 0.00137 | 0.00111 | 0.00184 | 0.00196 |
| 5.6E-06 | 0.001   | 0.00159 | 0.00198 | 0.00167 |
| 5.6E-06 | 0.00079 | 0.0012  | 0.00188 | 0.00231 |
| 5.6E-06 | 0.00127 | 0.00106 | 0.00253 | 0.00224 |
| 5.7E-06 | 0.00084 | 0.00163 | 0.00181 | 0.00214 |
| 5.7E-06 | 0.0009  | 0.0012  | 0.00148 | 0.00193 |
| 5.7E-06 | 0.0015  | 0.00149 | 0.00187 | 0.00222 |

|         |         |         |         |         |
|---------|---------|---------|---------|---------|
| 5.8E-06 | 0.00117 | 0.00158 | 0.00167 | 0.00195 |
| 5.8E-06 | 0.00123 | 0.00153 | 0.00076 | 0.0023  |
| 5.8E-06 | 0.00063 | 0.00136 | 0.00223 | 0.00219 |
| 5.9E-06 | 0.00086 | 0.00154 | 0.00244 | 0.00215 |
| 5.9E-06 | 0.00027 | 0.00126 | 0.00147 | 0.0017  |
| 5.9E-06 | 0.00084 | 0.00123 | 0.00163 | 0.00236 |
| 6E-06   | 1.9E-05 | 0.00152 | 0.00191 | 0.00181 |
| 6E-06   | 0.00042 | 0.0013  | 0.00242 | 0.00222 |
| 6E-06   | 0.00073 | 0.00101 | 0.00306 | 0.00239 |
| 6E-06   | 0.00073 | 0.00211 | 0.0013  | 0.00263 |
| 6.1E-06 | 0.0007  | 0.00178 | 0.00196 | 0.00229 |
| 6.1E-06 | 0.00026 | 0.00167 | 0.00247 | 0.00265 |
| 6.1E-06 | -0.0001 | 0.00113 | 0.00127 | 0.00212 |
| 6.2E-06 | 0.00042 | 0.00144 | 0.00233 | 0.00186 |
| 6.2E-06 | 0.00038 | 0.00123 | 0.00301 | 0.00222 |
| 6.2E-06 | 0.00044 | 0.00112 | 0.00218 | 0.00247 |
| 6.3E-06 | 0.00046 | 0.00017 | 0.0022  | 0.00229 |
| 6.3E-06 | 0.00026 | 0.00095 | 0.00294 | 0.00201 |
| 6.3E-06 | 0.00043 | 0.00111 | 0.00228 | 0.00261 |
| 6.4E-06 | 0.0008  | 0.00048 | 0.00135 | 0.002   |
| 6.4E-06 | -0.0001 | 0.00112 | 0.00108 | 0.00212 |
| 6.4E-06 | 0.00108 | 0.00081 | 0.00233 | 0.00229 |
| 6.5E-06 | 0.00019 | 0.00063 | 0.00188 | 0.00176 |
| 6.5E-06 | 0.00075 | 0.00115 | 0.00212 | 0.0016  |
| 6.5E-06 | 0.00073 | 0.00024 | 0.00225 | 0.00246 |
| 6.6E-06 | 0.00064 | 0.00103 | 0.0025  | 0.00247 |
| 6.6E-06 | 0.00059 | 0.00079 | 0.0031  | 0.00196 |
| 6.6E-06 | 0.00084 | 0.00129 | 0.00295 | 0.00202 |
| 6.7E-06 | -1E-05  | 0.00142 | 0.00171 | 0.00192 |
| 6.7E-06 | 0.0007  | 0.00063 | 0.00209 | 0.00222 |
| 6.7E-06 | 0.00028 | 0.00171 | 0.00191 | 0.00213 |
| 6.8E-06 | 0.00071 | 0.00095 | 0.00243 | 0.00227 |
| 6.8E-06 | 5.8E-05 | 0.00086 | 0.00146 | 0.0018  |
| 6.8E-06 | 0.00134 | 0.00058 | 0.00167 | 0.0024  |
| 6.8E-06 | 0.0015  | 0.00161 | 0.00176 | 0.00253 |
| 6.9E-06 | -8E-06  | 0.00103 | 0.00188 | 0.00269 |
| 6.9E-06 | 0.00059 | 0.00134 | 0.00144 | 0.00265 |
| 6.9E-06 | 0.001   | 0.00184 | 0.00158 | 0.00145 |
| 7E-06   | 0.00065 | 0.00142 | 0.00223 | 0.00164 |
| 7E-06   | 0.00097 | 0.00101 | 0.00187 | 0.00176 |
| 7E-06   | 0.00033 | 0.00081 | 0.00134 | 0.00228 |
| 7.1E-06 | 0.00067 | 0.00177 | 0.00178 | 0.00226 |
| 7.1E-06 | 0.00059 | 0.0006  | 0.00253 | 0.00229 |
| 7.1E-06 | 0.00025 | 0.00071 | 0.00117 | 0.00104 |
| 7.2E-06 | 0.00028 | 0.00066 | 0.00246 | 0.00152 |
| 7.2E-06 | 0.00102 | 0.00209 | 0.00267 | 0.00212 |
| 7.2E-06 | 0.00075 | 0.00072 | 0.00272 | 0.0019  |
| 7.3E-06 | 0.0004  | 0.00131 | 0.00292 | 0.00207 |
| 7.3E-06 | 0.00032 | 0.0013  | 0.00183 | 0.00185 |
| 7.3E-06 | 0.00074 | 0.00143 | 0.00221 | 0.00145 |
| 7.4E-06 | 0.00017 | 0.00105 | 0.00241 | 0.00153 |
| 7.4E-06 | 0.00044 | 0.00096 | 0.00145 | 0.00198 |
| 7.4E-06 | 0.00048 | 0.00092 | 0.00146 | 0.00203 |
| 7.5E-06 | 0.00056 | 0.00089 | 0.002   | 0.00179 |

|         |         |         |         |         |
|---------|---------|---------|---------|---------|
| 7.5E-06 | 0.00016 | 0.00098 | 0.00116 | 0.00237 |
| 7.5E-06 | 0.00013 | 0.00128 | 0.00169 | 0.00191 |
| 7.6E-06 | -0.0006 | 0.00042 | 0.00167 | 0.00319 |
| 7.6E-06 | 0.00116 | 0.00114 | 0.00214 | 0.00226 |
| 7.6E-06 | 0.00099 | 0.00132 | 0.0013  | 0.00185 |
| 7.6E-06 | 0.00026 | 0.00099 | 0.00216 | 0.00209 |
| 7.7E-06 | 0.0003  | 0.00068 | 0.00171 | 0.00154 |
| 7.7E-06 | 0.0007  | 0.00124 | 0.00187 | 0.00231 |
| 7.7E-06 | 0.00064 | 0.00115 | 0.00133 | 0.00206 |
| 7.8E-06 | 0.00084 | 0.0012  | 0.00109 | 0.00247 |
| 7.8E-06 | 0.0004  | 0.00117 | 0.00193 | 0.00242 |
| 7.8E-06 | 0.00065 | 0.00036 | 0.00117 | 0.00164 |
| 7.9E-06 | 0.00102 | 0.0011  | 0.00172 | 0.00264 |
| 7.9E-06 | 8.6E-05 | 0.00046 | 0.00141 | 0.00184 |
| 7.9E-06 | 0.00027 | 0.00046 | 0.00099 | 0.00161 |
| 8E-06   | -0.0002 | 0.00136 | 0.00143 | 0.00193 |
| 8E-06   | -0.0004 | 0.00099 | 0.00164 | 0.00236 |
| 8E-06   | 2.7E-05 | 0.001   | 0.00152 | 0.00142 |
| 8.1E-06 | 0.00062 | 0.00058 | 0.00172 | 0.00248 |
| 8.1E-06 | 0.00053 | 0.00094 | 0.00262 | 0.00156 |
| 8.1E-06 | -0.0003 | 0.00172 | 0.00163 | 0.00169 |
| 8.2E-06 | 0.00019 | 0.00028 | 0.00155 | 0.00161 |
| 8.2E-06 | 0.00054 | 0.00094 | 0.00227 | 0.00161 |
| 8.2E-06 | 0.00023 | 0.00083 | 0.00287 | 0.00203 |
| 8.3E-06 | 0.00058 | 0.00115 | 0.00176 | 0.00206 |
| 8.3E-06 | 0.00083 | 0.00132 | 0.00155 | 0.00117 |
| 8.3E-06 | -0.0004 | 0.00076 | 0.00186 | 0.00207 |
| 8.4E-06 | -3E-05  | 0.00059 | 0.00206 | 0.00158 |
| 8.4E-06 | 0.00069 | 0.00136 | 0.00163 | 0.00181 |
| 8.4E-06 | 0.00062 | 0.00185 | 0.00052 | 0.00231 |
| 8.4E-06 | 0.00063 | 0.00042 | 0.00109 | 0.00195 |
| 8.5E-06 | 0.00117 | 0.00072 | 0.00115 | 0.00236 |
| 8.5E-06 | -0.0006 | 0.00029 | 0.00134 | 0.00214 |
| 8.5E-06 | 0.0003  | 0.00066 | 0.00145 | 0.00186 |
| 8.6E-06 | -0.0002 | 0.00081 | 0.00149 | 0.00191 |
| 8.6E-06 | 0.00078 | 0.00047 | 0.00103 | 0.0017  |
| 8.6E-06 | 0.00015 | 0.00072 | 0.00125 | 0.00236 |
| 8.7E-06 | 0.00087 | 0.00105 | 0.00174 | 0.00167 |
| 8.7E-06 | 0.00081 | 0.00087 | 0.00212 | 0.00194 |
| 8.7E-06 | -1E-06  | 0.00086 | 0.00264 | 0.00163 |
| 8.8E-06 | 0.0001  | 0.00061 | 0.00129 | 0.00287 |
| 8.8E-06 | -4E-05  | 0.00123 | 0.00048 | 0.00218 |
| 8.8E-06 | 0.00074 | 0.00149 | 0.00105 | 0.00141 |
| 8.9E-06 | 0.00066 | 0.00088 | 0.00143 | 0.00179 |
| 8.9E-06 | 0.00058 | 0.00074 | 0.00085 | 0.00143 |
| 8.9E-06 | 0.00084 | 0.00127 | 0.00195 | 0.0017  |
| 9E-06   | 0.00082 | 0.00083 | 0.00155 | 0.00177 |
| 9E-06   | -1E-05  | 0.00125 | 0.00126 | 0.00256 |
| 9E-06   | 0.00025 | 0.00091 | 0.00078 | 0.00236 |
| 9.1E-06 | -0.0005 | 0.0007  | 0.00161 | 0.00163 |
| 9.1E-06 | -0.0004 | 0.00081 | 0.00225 | 0.00203 |
| 9.1E-06 | -0.0003 | 0.0007  | 0.00302 | 0.00171 |
| 9.2E-06 | 0.00078 | 0.00084 | 0.00217 | 0.00171 |
| 9.2E-06 | 0.00032 | 0.00081 | 0.00152 | 0.00203 |

|         |         |         |         |         |
|---------|---------|---------|---------|---------|
| 9.2E-06 | 0.00027 | 0.00113 | 0.00158 | 0.00164 |
| 9.2E-06 | 0.00063 | 0.00058 | 0.00164 | 0.0021  |
| 9.3E-06 | -0.0001 | -5E-05  | 0.00137 | 0.00183 |
| 9.3E-06 | 0.00076 | 0.00129 | 0.00225 | 0.00302 |
| 9.3E-06 | 0.00032 | 0.00108 | 0.00235 | 0.00323 |
| 9.4E-06 | -0.0002 | 0.00036 | 0.00176 | 0.0028  |
| 9.4E-06 | 5.3E-05 | 0.00034 | 0.00239 | 0.00221 |
| 9.4E-06 | -0.0002 | 0.00135 | 0.0013  | 0.00249 |
| 9.5E-06 | 0.00011 | 0.00089 | 0.00133 | 0.0021  |
| 9.5E-06 | 4.5E-05 | 0.00034 | 0.00199 | 0.0022  |
| 9.5E-06 | 0.00012 | 0.00058 | 0.0017  | 0.00174 |
| 9.6E-06 | 0.00013 | 0.00042 | 0.00183 | 0.00188 |
| 9.6E-06 | 0.00025 | 0.00058 | 0.00172 | 0.00094 |
| 9.6E-06 | 3.8E-05 | -0.0001 | 0.00103 | 0.00122 |
| 9.7E-06 | 9.4E-05 | 0.00075 | 0.00153 | 0.00238 |
| 9.7E-06 | -0.0001 | 0.00015 | 0.0025  | 0.00199 |
| 9.7E-06 | -0.0009 | 0.00051 | 0.00161 | 0.00143 |
| 9.8E-06 | 0.00094 | 0.0005  | 0.00181 | 0.00151 |
| 9.8E-06 | 3E-05   | 0.00105 | 0.00202 | 0.00113 |
| 9.8E-06 | 0.00057 | 0.00058 | 0.00179 | 0.00241 |
| 9.9E-06 | 0.00037 | 0.00037 | 0.00167 | 0.00255 |
| 9.9E-06 | 4.8E-05 | 0.00046 | 0.00165 | 0.00196 |
| 9.9E-06 | -0.0006 | 0.0009  | 0.00169 | 0.00274 |
| 1E-05   | -0.0005 | 0.001   | 0.00122 | 0.0013  |
| 1E-05   | -0.0005 | 0.00031 | 0.00234 | 0.00221 |
| 1E-05   | 0.00062 | 0.00099 | 0.00201 | 0.00193 |
| 1E-05   | 0.00037 | 0.00054 | 0.00158 | 0.00131 |
| 1E-05   | -0.0001 | 0.00054 | 0.00155 | 0.00119 |
| 1E-05   | 0.00029 | 0.00025 | 0.00219 | 0.00188 |
| 1E-05   | 0.00042 | 0.00121 | 0.00218 | 0.00257 |
| 1E-05   | 0.00032 | 0.00077 | 0.00132 | 0.00162 |
| 1E-05   | -0.0002 | 0.00076 | 0.00164 | 0.00183 |
| 1E-05   | 0.0001  | 0.0007  | 0.00205 | 0.00166 |
| 1E-05   | 0.00019 | 0.00081 | 0.00234 | 0.00074 |
| 1E-05   | 0.00022 | 0.00062 | 0.00213 | 0.00172 |
| 1E-05   | -0.0002 | 0.00053 | 0.00154 | 0.00118 |
| 1E-05   | 0.00043 | -0.0002 | 0.00144 | 0.00137 |
| 1E-05   | -0.0001 | 0.00069 | 0.002   | 0.00161 |
| 1E-05   | 0.00014 | 0.00057 | 0.00144 | 0.00179 |
| 1E-05   | 0.00037 | 0.00018 | 0.00169 | 0.00272 |
| 1.1E-05 | 0.00057 | -0.0001 | 0.0014  | 0.00142 |
| 1.1E-05 | 0.00056 | 0.0016  | 0.00161 | 0.00139 |
| 1.1E-05 | -0.0002 | 0.00038 | 0.00147 | 0.00207 |
| 1.1E-05 | -0.0001 | -7E-05  | 0.00172 | 0.00159 |
| 1.1E-05 | -0.0003 | 0.00058 | 0.00198 | 0.00235 |
| 1.1E-05 | 0.00017 | 9.9E-05 | 0.00347 | 0.00192 |
| 1.1E-05 | 0.00055 | -0.0002 | 0.0017  | 0.0017  |
| 1.1E-05 | 0.00037 | 0.00019 | 0.00144 | 0.00198 |
| 1.1E-05 | 0.00015 | 0.0007  | 0.00186 | 0.00205 |
| 1.1E-05 | 0.00029 | 0.00021 | 0.00158 | 0.00198 |
| 1.1E-05 | -4E-05  | 7.4E-05 | 0.00168 | 0.002   |
| 1.1E-05 | 0.00092 | 0.00033 | 0.00116 | 0.00138 |
| 1.1E-05 | 0.00055 | 0.00105 | 0.00121 | 0.00118 |
| 1.1E-05 | 0.00022 | 0.0009  | 0.00183 | 0.00178 |

|         |         |         |         |         |
|---------|---------|---------|---------|---------|
| 1.1E-05 | 8.5E-05 | -7E-05  | 0.00176 | 0.00236 |
| 1.1E-05 | 0.00038 | 0.00046 | 0.00158 | 0.00263 |
| 1.1E-05 | -0.0006 | 0.00049 | 0.00132 | 0.00221 |
| 1.1E-05 | 6.4E-05 | 0.00072 | 0.00129 | 0.00184 |
| 1.1E-05 | 7.5E-05 | 0.0009  | 0.00204 | 0.00249 |
| 1.1E-05 | -5E-05  | 5.3E-05 | 0.00214 | 0.00128 |
| 1.1E-05 | -0.0002 | 5.1E-06 | 0.00168 | 0.00238 |
| 1.1E-05 | -0.0003 | 0.00025 | 0.0018  | 0.00196 |
| 1.1E-05 | 0.00023 | 0.00073 | 0.0019  | 0.00126 |
| 1.1E-05 | 0.00015 | 0.00038 | 0.00158 | 0.00149 |
| 1.1E-05 | -4E-05  | 1.1E-05 | 0.00147 | 0.00224 |
| 1.1E-05 | -0.0002 | 0.00013 | 0.00161 | 0.00257 |
| 1.1E-05 | -9E-05  | 0.00027 | 0.00121 | 0.00165 |
| 1.1E-05 | 0.00077 | 0.00034 | 0.00091 | 0.00208 |
| 1.1E-05 | 0.00064 | 0.00104 | 0.00104 | 0.00144 |
| 1.1E-05 | -0.001  | 0.00057 | 0.00185 | 0.00216 |
| 1.1E-05 | 0.00043 | 0.00135 | 0.00124 | 0.00181 |
| 1.1E-05 | -0.0008 | 0.00033 | 0.00149 | 0.00235 |
| 1.2E-05 | -0.0006 | 0.00104 | 0.00153 | 0.00199 |
| 1.2E-05 | -2E-05  | 0.00033 | 0.00135 | 0.00246 |
| 1.2E-05 | -6E-05  | 9.9E-05 | 0.00134 | 0.00089 |
| 1.2E-05 | -0.0003 | 0.00075 | 0.00143 | 0.00228 |
| 1.2E-05 | -0.0002 | 0.00035 | 0.00176 | 0.00089 |
| 1.2E-05 | 0.00028 | 0.00063 | 0.0015  | 0.00124 |
| 1.2E-05 | 0.00034 | -0.0005 | 0.00215 | 0.00168 |
| 1.2E-05 | 0.00031 | 0.00146 | 0.00204 | 0.00171 |
| 1.2E-05 | -0.0002 | 0.00039 | 0.00099 | 0.00217 |
| 1.2E-05 | 0.00029 | 2.1E-06 | 0.00197 | 0.00194 |
| 1.2E-05 | 0.00036 | 0.00011 | 0.00124 | 0.003   |
| 1.2E-05 | 0.00017 | 0.00105 | 0.00147 | 0.00203 |
| 1.2E-05 | 0.00021 | 0.00086 | 0.00194 | 0.00166 |
| 1.2E-05 | -0.0006 | 0.001   | 0.00206 | 0.00269 |
| 1.2E-05 | 0.0003  | 0.00081 | 0.0012  | 0.00075 |
| 1.2E-05 | 3.7E-05 | 0.00017 | 0.00135 | 0.00195 |
| 1.2E-05 | 0.00012 | 0.00035 | 0.00163 | 0.00141 |
| 1.2E-05 | 0.00032 | 0.00137 | 0.0007  | 0.00215 |
| 1.2E-05 | -0.0003 | 0.0008  | 0.00112 | 0.00149 |
| 1.2E-05 | -0.0002 | 0.00086 | 0.00156 | 0.00197 |
| 1.2E-05 | 0.00038 | 0.00036 | 0.00131 | 0.00183 |
| 1.2E-05 | 5.1E-05 | 0.00146 | 0.00188 | 0.00251 |
| 1.2E-05 | -0.0006 | 0.0011  | 0.00104 | 0.0017  |
| 1.2E-05 | -0.0004 | 0.00045 | 0.0006  | 0.00239 |
| 1.2E-05 | 0.00035 | 0.00052 | 0.00162 | 0.00155 |
| 1.2E-05 | 0.00013 | 0.00034 | 0.00141 | 0.00138 |
| 1.2E-05 | -0.0002 | 0.0006  | 0.00138 | 0.00149 |
| 1.2E-05 | 0.00025 | 0.00063 | 0.00164 | 0.00107 |
| 1.2E-05 | -3E-05  | 0.00051 | 0.0017  | 0.00123 |
| 1.2E-05 | 0.00063 | 0.00047 | 0.00158 | 0.00176 |
| 1.2E-05 | -3E-05  | 0.00074 | 0.00146 | 0.00235 |
| 1.3E-05 | 1.8E-05 | 0.00147 | 0.00135 | 0.00238 |
| 1.3E-05 | 0.00015 | 0.00072 | 0.00165 | 0.00098 |
| 1.3E-05 | -0.0002 | 0.00087 | 0.00149 | 0.00127 |
| 1.3E-05 | 0.00012 | -0.0001 | 0.00226 | 0.00169 |
| 1.3E-05 | -0.0004 | 0.00064 | 0.00151 | 0.00162 |

|         |         |         |         |         |
|---------|---------|---------|---------|---------|
| 1.3E-05 | 0.00094 | 0.00041 | 0.00167 | 0.0017  |
| 1.3E-05 | 0.00086 | 0.00088 | 0.00209 | 0.00248 |
| 1.3E-05 | -0.0001 | 0.00012 | 0.00121 | 0.00109 |
| 1.3E-05 | 0.00075 | 0.0015  | 0.00182 | 0.00158 |
| 1.3E-05 | 0.0002  | 0.00121 | 0.00142 | 0.00162 |
| 1.3E-05 | -0.0002 | 0.00061 | 0.0021  | 0.00117 |
| 1.3E-05 | 0.00011 | 0.00104 | 0.00231 | 0.00223 |
| 1.3E-05 | 0.00053 | 0.00021 | 0.00139 | 0.00221 |
| 1.3E-05 | 0.00016 | 0.00049 | 0.00178 | 0.00229 |
| 1.3E-05 | 0.00063 | -0.0002 | 0.00169 | 0.00158 |
| 1.3E-05 | 0.00019 | 0.00068 | 0.00168 | 0.00102 |
| 1.3E-05 | -0.0004 | 0.00071 | 0.00171 | 0.00169 |
| 1.3E-05 | 1.7E-05 | 0.00045 | 0.00076 | 0.00188 |
| 1.3E-05 | -0.0002 | 0.00113 | 0.00161 | 0.0016  |
| 1.3E-05 | 0.00015 | 0.00022 | 0.00174 | 0.00198 |
| 1.3E-05 | 0.00056 | 0.00042 | 0.00161 | 0.0013  |
| 1.3E-05 | 0.00014 | 0.0013  | 0.00213 | 0.00089 |
| 1.3E-05 | 0.00032 | 0.00124 | 0.00119 | 0.00194 |
| 1.3E-05 | 0.00064 | 0.00017 | 0.0012  | 0.0024  |
| 1.3E-05 | -5E-05  | 0.00068 | 0.00174 | 0.00195 |
| 1.3E-05 | -0.0004 | 8E-05   | 0.00186 | 0.00207 |
| 1.3E-05 | 0.00027 | 0.0007  | 0.00091 | 0.00166 |
| 1.3E-05 | 5.2E-05 | -0.0004 | 0.00136 | 0.0015  |
| 1.3E-05 | -0.0003 | -1E-05  | 0.00195 | 0.0012  |
| 1.3E-05 | -0.0004 | 0.00056 | 0.00193 | 0.00151 |
| 1.3E-05 | -8E-05  | 0.00051 | 0.00139 | 0.00176 |
| 1.4E-05 | -0.0004 | 0.0004  | 0.00159 | 0.00229 |
| 1.4E-05 | -0.0005 | -0.0004 | 0.00159 | 0.00169 |
| 1.4E-05 | -0.0001 | 0.0008  | 0.00176 | 0.00231 |
| 1.4E-05 | 0.00045 | 0.00086 | 0.0014  | 0.00199 |
| 1.4E-05 | -0.0003 | 0.00137 | 0.0015  | 0.00129 |
| 1.4E-05 | -0.0006 | 0.00108 | 0.00201 | 0.00197 |
| 1.4E-05 | 0.00063 | 0.00069 | 0.00212 | 0.00161 |
| 1.4E-05 | 0.00026 | 0.0009  | 0.00117 | 0.00211 |
| 1.4E-05 | -1E-04  | 0.00113 | 0.00146 | 0.00186 |
| 1.4E-05 | -0.0002 | 0.00037 | 0.00188 | 0.00114 |
| 1.4E-05 | 0.00059 | 0.00072 | 0.00125 | 0.00148 |
| 1.4E-05 | -0.0002 | 0.00173 | 0.00207 | 0.00145 |
| 1.4E-05 | -0.0004 | 0.00059 | 0.00185 | 0.00222 |
| 1.4E-05 | 0.00039 | 0.0003  | 0.00156 | 0.00196 |
| 1.4E-05 | 0.00056 | 0.00072 | 0.00174 | 0.00131 |
| 1.4E-05 | 0.00014 | 0.00068 | 0.00175 | 0.003   |
| 1.4E-05 | -0.0006 | 0.00027 | 0.00172 | 0.0016  |
| 1.4E-05 | 0.00015 | 0.00011 | 0.00141 | 0.00137 |
| 1.4E-05 | 0.0008  | 0.00073 | 0.00186 | 0.00132 |
| 1.4E-05 | 0.00101 | 0.00119 | 0.00153 | 0.00087 |
| 1.4E-05 | 9.7E-05 | 0.00125 | 0.00133 | 0.00167 |
| 1.4E-05 | -0.0009 | 0.00115 | 0.00142 | 0.00243 |
| 1.4E-05 | -0.0004 | 0.00068 | 0.00141 | 0.00137 |
| 1.4E-05 | 0.00015 | 0.00058 | 0.00178 | 0.00052 |
| 1.4E-05 | 0.00065 | 0.00039 | 0.00129 | 0.00119 |
| 1.4E-05 | -0.0004 | 0.00075 | 0.00152 | 0.00189 |
| 1.4E-05 | -0.0003 | 0.00109 | 0.00193 | 0.00142 |
| 1.4E-05 | -9E-05  | 0.00086 | 0.00138 | 0.001   |



|         |         |         |         |         |
|---------|---------|---------|---------|---------|
| 1.4E-05 | -0.0002 | 0.00096 | 0.00124 | 0.00119 |
| 1.4E-05 | 0.00027 | 0.00103 | 0.00169 | 0.00172 |
| 1.4E-05 | 0.00051 | 0.0011  | 0.00119 | 0.0011  |
| 1.5E-05 | 0.00026 | 0.00024 | 0.00158 | 0.00121 |
| 1.5E-05 | 0.00048 | 0.0009  | 0.0013  | 0.00151 |
| 1.5E-05 | -0.0004 | 0.00018 | 0.00146 | 0.00155 |
| 1.5E-05 | 0.00033 | 0.0003  | 0.00124 | 0.0014  |
| 1.5E-05 | 0.0001  | 0.00093 | 0.002   | 0.00274 |
| 1.5E-05 | 0.00018 | 0.00114 | 0.00183 | 0.00218 |
| 1.5E-05 | 0.00086 | 0.00085 | 0.0017  | 0.00076 |
| 1.5E-05 | -0.0006 | 0.00112 | 0.00185 | 0.00115 |
| 1.5E-05 | -0.0003 | 0.00093 | 0.00125 | 0.00075 |
| 1.5E-05 | 0.00052 | 0.00167 | 0.00128 | 0.00139 |
| 1.5E-05 | 0.00031 | 0.00025 | 0.00191 | 0.00187 |
| 1.5E-05 | -0.0005 | 0.00081 | 0.00206 | 0.00103 |
| 1.5E-05 | 5.7E-05 | 0.00122 | 0.00146 | 0.00196 |
| 1.5E-05 | 0.00067 | 0.00041 | 0.00165 | 0.00193 |
| 1.5E-05 | 0.00031 | 0.0007  | 0.00176 | 0.00149 |
| 1.5E-05 | 0.00013 | -2E-05  | 0.00128 | 0.00182 |

**Table SI.21:** Primary kinetic data for the reaction of ethylene carbonate (S21) with CumO• generated by 355 nm LFP in MeCN (**Figure SI.21**).

| t / s    | $\Delta A$ ethylene carbonate (S21) |          |          |
|----------|-------------------------------------|----------|----------|
|          | 0.25 M                              | 1.125 M  | 2.5 M    |
| -9.9E-07 | 6.1E-04                             | -3.4E-04 | 1.1E-04  |
| -9.6E-07 | 3.7E-04                             | -3.5E-04 | 1.1E-04  |
| -9.3E-07 | 3.0E-04                             | -5.1E-04 | 1.3E-04  |
| -9.0E-07 | 2.5E-04                             | -1.6E-05 | -5.6E-04 |
| -8.6E-07 | 9.0E-04                             | -2.7E-04 | -3.3E-04 |
| -8.3E-07 | 9.6E-04                             | -5.9E-04 | -6.1E-04 |
| -8.0E-07 | 3.1E-04                             | -4.1E-04 | -3.6E-05 |
| -7.7E-07 | 2.8E-04                             | 1.4E-04  | 9.8E-06  |
| -7.4E-07 | 2.1E-04                             | -9.6E-04 | 1.1E-04  |
| -7.0E-07 | 2.5E-04                             | -1.0E-03 | -1.7E-04 |
| -6.7E-07 | 3.1E-05                             | -2.7E-04 | -2.2E-04 |
| -6.4E-07 | 2.1E-04                             | -2.6E-04 | -5.1E-05 |
| -6.1E-07 | 3.9E-04                             | -7.9E-04 | -1.9E-05 |
| -5.8E-07 | -8.8E-06                            | -4.2E-04 | -5.0E-04 |
| -5.4E-07 | 4.9E-04                             | 6.2E-05  | -3.1E-04 |
| -5.1E-07 | 5.8E-04                             | 2.9E-04  | 9.0E-05  |
| -4.8E-07 | 1.3E-04                             | -7.8E-05 | -4.4E-05 |
| -4.5E-07 | 2.7E-04                             | -2.2E-04 | -5.9E-04 |
| -4.2E-07 | 9.9E-04                             | 1.6E-05  | -4.2E-04 |
| -3.8E-07 | 6.3E-04                             | -2.9E-04 | -2.7E-04 |
| -3.5E-07 | 4.1E-04                             | -7.5E-04 | -4.1E-04 |
| -3.2E-07 | 6.3E-04                             | -1.4E-04 | -6.3E-04 |
| -2.9E-07 | 1.8E-04                             | -1.0E-04 | -2.9E-04 |
| -2.6E-07 | 4.1E-04                             | 2.0E-04  | -5.4E-05 |
| -2.2E-07 | 3.8E-04                             | -5.6E-04 | -1.7E-04 |
| -1.9E-07 | 5.2E-04                             | 8.6E-05  | -3.3E-04 |
| -1.6E-07 | 4.5E-04                             | -1.1E-04 | -1.6E-04 |
| -1.3E-07 | 7.0E-04                             | 3.1E-04  | -4.1E-04 |
| -9.6E-08 | 2.8E-04                             | -9.6E-05 | -3.7E-05 |
| -6.4E-08 | 8.3E-05                             | -5.0E-05 | -2.9E-04 |
| -3.2E-08 | 3.3E-04                             | 6.6E-05  | -3.7E-04 |
| -1.9E-10 | -2.1E-03                            | -2.9E-03 | -3.0E-03 |
| 3.2E-08  | -3.4E-03                            | -8.0E-03 | -8.8E-03 |
| 6.4E-08  | 1.9E-02                             | 1.6E-02  | 1.5E-02  |
| 9.6E-08  | 1.9E-02                             | 1.7E-02  | 1.6E-02  |
| 1.3E-07  | 1.9E-02                             | 1.7E-02  | 1.6E-02  |
| 1.6E-07  | 1.9E-02                             | 1.6E-02  | 1.5E-02  |
| 1.9E-07  | 1.8E-02                             | 1.6E-02  | 1.6E-02  |
| 2.2E-07  | 1.8E-02                             | 1.5E-02  | 1.5E-02  |
| 2.6E-07  | 1.7E-02                             | 1.5E-02  | 1.4E-02  |
| 2.9E-07  | 1.6E-02                             | 1.5E-02  | 1.4E-02  |
| 3.2E-07  | 1.6E-02                             | 1.4E-02  | 1.3E-02  |
| 3.5E-07  | 1.6E-02                             | 1.4E-02  | 1.3E-02  |
| 3.8E-07  | 1.6E-02                             | 1.4E-02  | 1.3E-02  |
| 4.2E-07  | 1.5E-02                             | 1.3E-02  | 1.2E-02  |
| 4.5E-07  | 1.5E-02                             | 1.3E-02  | 1.3E-02  |
| 4.8E-07  | 1.4E-02                             | 1.2E-02  | 1.2E-02  |
| 5.1E-07  | 1.4E-02                             | 1.2E-02  | 1.2E-02  |
| 5.4E-07  | 1.3E-02                             | 1.2E-02  | 1.1E-02  |

|         |         |         |         |
|---------|---------|---------|---------|
| 5.8E-07 | 1.3E-02 | 1.2E-02 | 1.1E-02 |
| 6.1E-07 | 1.3E-02 | 1.2E-02 | 1.0E-02 |
| 6.4E-07 | 1.2E-02 | 1.1E-02 | 1.0E-02 |
| 6.7E-07 | 1.3E-02 | 1.1E-02 | 1.0E-02 |
| 7.0E-07 | 1.3E-02 | 1.0E-02 | 9.8E-03 |
| 7.4E-07 | 1.3E-02 | 1.0E-02 | 9.8E-03 |
| 7.7E-07 | 1.2E-02 | 9.6E-03 | 9.3E-03 |
| 8.0E-07 | 1.2E-02 | 9.6E-03 | 9.1E-03 |
| 8.3E-07 | 1.1E-02 | 9.9E-03 | 9.2E-03 |
| 8.6E-07 | 1.1E-02 | 9.8E-03 | 9.1E-03 |
| 9.0E-07 | 1.1E-02 | 9.4E-03 | 8.5E-03 |
| 9.3E-07 | 1.0E-02 | 9.5E-03 | 8.7E-03 |
| 9.6E-07 | 1.0E-02 | 8.9E-03 | 8.8E-03 |
| 9.9E-07 | 1.0E-02 | 8.5E-03 | 7.9E-03 |
| 1.0E-06 | 9.6E-03 | 8.8E-03 | 7.5E-03 |
| 1.1E-06 | 1.0E-02 | 7.9E-03 | 7.6E-03 |
| 1.1E-06 | 9.5E-03 | 7.6E-03 | 7.4E-03 |
| 1.1E-06 | 8.9E-03 | 8.2E-03 | 7.4E-03 |
| 1.2E-06 | 8.5E-03 | 7.5E-03 | 6.9E-03 |
| 1.2E-06 | 8.8E-03 | 7.6E-03 | 7.4E-03 |
| 1.2E-06 | 8.8E-03 | 7.2E-03 | 7.1E-03 |
| 1.3E-06 | 8.5E-03 | 7.0E-03 | 6.3E-03 |
| 1.3E-06 | 7.9E-03 | 7.4E-03 | 6.5E-03 |
| 1.3E-06 | 8.3E-03 | 7.0E-03 | 6.6E-03 |
| 1.3E-06 | 8.3E-03 | 7.2E-03 | 6.2E-03 |
| 1.4E-06 | 7.9E-03 | 6.2E-03 | 5.8E-03 |
| 1.4E-06 | 7.2E-03 | 7.0E-03 | 6.1E-03 |
| 1.4E-06 | 7.4E-03 | 6.2E-03 | 5.9E-03 |
| 1.5E-06 | 7.3E-03 | 5.9E-03 | 6.2E-03 |
| 1.5E-06 | 7.6E-03 | 5.9E-03 | 5.2E-03 |
| 1.5E-06 | 6.4E-03 | 5.2E-03 | 5.5E-03 |
| 1.6E-06 | 6.8E-03 | 5.7E-03 | 5.4E-03 |
| 1.6E-06 | 6.4E-03 | 5.9E-03 | 5.0E-03 |
| 1.6E-06 | 6.3E-03 | 5.7E-03 | 5.2E-03 |
| 1.7E-06 | 6.6E-03 | 5.4E-03 | 5.3E-03 |
| 1.7E-06 | 6.1E-03 | 5.0E-03 | 4.8E-03 |
| 1.7E-06 | 6.3E-03 | 5.2E-03 | 4.8E-03 |
| 1.8E-06 | 6.2E-03 | 5.6E-03 | 4.9E-03 |
| 1.8E-06 | 6.0E-03 | 4.7E-03 | 4.8E-03 |
| 1.8E-06 | 6.0E-03 | 5.3E-03 | 4.7E-03 |
| 1.9E-06 | 5.9E-03 | 4.7E-03 | 4.9E-03 |
| 1.9E-06 | 5.2E-03 | 4.8E-03 | 4.1E-03 |
| 1.9E-06 | 5.2E-03 | 4.2E-03 | 3.9E-03 |
| 2.0E-06 | 5.2E-03 | 5.0E-03 | 4.6E-03 |
| 2.0E-06 | 5.2E-03 | 4.3E-03 | 3.8E-03 |
| 2.0E-06 | 4.7E-03 | 3.9E-03 | 3.9E-03 |
| 2.1E-06 | 5.3E-03 | 4.1E-03 | 3.3E-03 |
| 2.1E-06 | 4.6E-03 | 3.3E-03 | 3.4E-03 |
| 2.1E-06 | 5.4E-03 | 4.0E-03 | 3.6E-03 |
| 2.1E-06 | 5.0E-03 | 4.1E-03 | 3.3E-03 |
| 2.2E-06 | 4.7E-03 | 3.4E-03 | 3.8E-03 |
| 2.2E-06 | 4.7E-03 | 4.2E-03 | 3.1E-03 |
| 2.2E-06 | 5.2E-03 | 3.5E-03 | 3.0E-03 |
| 2.3E-06 | 4.5E-03 | 3.8E-03 | 3.2E-03 |

|         |         |         |         |
|---------|---------|---------|---------|
| 2.3E-06 | 4.5E-03 | 3.5E-03 | 2.9E-03 |
| 2.3E-06 | 4.6E-03 | 4.0E-03 | 2.8E-03 |
| 2.4E-06 | 4.2E-03 | 3.1E-03 | 2.8E-03 |
| 2.4E-06 | 4.1E-03 | 3.6E-03 | 3.2E-03 |
| 2.4E-06 | 4.1E-03 | 3.5E-03 | 2.8E-03 |
| 2.5E-06 | 3.9E-03 | 3.0E-03 | 2.6E-03 |
| 2.5E-06 | 4.2E-03 | 3.8E-03 | 2.6E-03 |
| 2.5E-06 | 3.6E-03 | 3.5E-03 | 2.9E-03 |
| 2.6E-06 | 4.1E-03 | 3.1E-03 | 3.1E-03 |
| 2.6E-06 | 3.3E-03 | 3.2E-03 | 2.6E-03 |
| 2.6E-06 | 2.9E-03 | 3.7E-03 | 2.5E-03 |
| 2.7E-06 | 3.7E-03 | 3.0E-03 | 2.7E-03 |
| 2.7E-06 | 3.9E-03 | 3.2E-03 | 3.0E-03 |
| 2.7E-06 | 3.3E-03 | 2.2E-03 | 2.2E-03 |
| 2.8E-06 | 3.5E-03 | 2.8E-03 | 2.4E-03 |
| 2.8E-06 | 3.6E-03 | 3.0E-03 | 2.1E-03 |
| 2.8E-06 | 3.2E-03 | 3.0E-03 | 1.9E-03 |
| 2.9E-06 | 3.5E-03 | 2.8E-03 | 2.1E-03 |
| 2.9E-06 | 3.5E-03 | 1.5E-03 | 2.1E-03 |
| 2.9E-06 | 2.5E-03 | 2.6E-03 | 1.5E-03 |
| 2.9E-06 | 3.1E-03 | 2.1E-03 | 1.9E-03 |
| 3.0E-06 | 2.8E-03 | 2.3E-03 | 1.8E-03 |
| 3.0E-06 | 3.0E-03 | 1.9E-03 | 1.6E-03 |
| 3.0E-06 | 2.4E-03 | 2.3E-03 | 2.1E-03 |
| 3.1E-06 | 2.8E-03 | 2.2E-03 | 2.1E-03 |
| 3.1E-06 | 2.4E-03 | 1.2E-03 | 2.1E-03 |
| 3.1E-06 | 2.0E-03 | 2.8E-03 | 1.9E-03 |
| 3.2E-06 | 2.2E-03 | 2.0E-03 | 1.9E-03 |
| 3.2E-06 | 2.0E-03 | 2.0E-03 | 1.6E-03 |
| 3.2E-06 | 2.9E-03 | 1.5E-03 | 2.1E-03 |
| 3.3E-06 | 2.1E-03 | 2.1E-03 | 1.6E-03 |
| 3.3E-06 | 2.3E-03 | 2.0E-03 | 1.8E-03 |
| 3.3E-06 | 2.3E-03 | 1.6E-03 | 2.2E-03 |
| 3.4E-06 | 2.5E-03 | 2.1E-03 | 2.0E-03 |
| 3.4E-06 | 2.0E-03 | 1.5E-03 | 1.7E-03 |
| 3.4E-06 | 2.2E-03 | 1.4E-03 | 1.5E-03 |
| 3.5E-06 | 2.2E-03 | 1.4E-03 | 1.7E-03 |
| 3.5E-06 | 1.8E-03 | 2.1E-03 | 2.1E-03 |
| 3.5E-06 | 2.0E-03 | 2.1E-03 | 1.1E-03 |
| 3.6E-06 | 1.8E-03 | 1.8E-03 | 1.4E-03 |
| 3.6E-06 | 1.8E-03 | 1.5E-03 | 1.6E-03 |
| 3.6E-06 | 1.6E-03 | 1.4E-03 | 1.0E-03 |
| 3.7E-06 | 2.4E-03 | 1.4E-03 | 1.1E-03 |
| 3.7E-06 | 2.3E-03 | 1.1E-03 | 1.5E-03 |
| 3.7E-06 | 1.6E-03 | 7.7E-04 | 1.4E-03 |
| 3.7E-06 | 2.1E-03 | 1.5E-03 | 8.2E-04 |
| 3.8E-06 | 2.4E-03 | 1.9E-03 | 1.1E-03 |
| 3.8E-06 | 2.0E-03 | 1.6E-03 | 1.6E-03 |
| 3.8E-06 | 2.5E-03 | 1.9E-03 | 1.1E-03 |
| 3.9E-06 | 2.0E-03 | 1.6E-03 | 4.1E-04 |
| 3.9E-06 | 2.3E-03 | 9.6E-04 | 1.1E-03 |
| 3.9E-06 | 2.0E-03 | 1.3E-03 | 8.1E-04 |
| 4.0E-06 | 2.1E-03 | 2.0E-03 | 9.3E-04 |
| 4.0E-06 | 1.7E-03 | 1.3E-03 | 8.1E-04 |

|         |         |          |         |
|---------|---------|----------|---------|
| 4.0E-06 | 1.5E-03 | 1.4E-03  | 8.2E-04 |
| 4.1E-06 | 1.8E-03 | 1.2E-03  | 9.3E-04 |
| 4.1E-06 | 2.0E-03 | 1.5E-03  | 1.2E-03 |
| 4.1E-06 | 1.8E-03 | 1.5E-03  | 9.0E-04 |
| 4.2E-06 | 1.6E-03 | 1.3E-03  | 5.4E-04 |
| 4.2E-06 | 2.4E-03 | 1.8E-03  | 6.2E-04 |
| 4.2E-06 | 1.5E-03 | 1.7E-03  | 8.9E-04 |
| 4.3E-06 | 1.8E-03 | 1.4E-03  | 3.3E-04 |
| 4.3E-06 | 2.1E-03 | 1.2E-03  | 7.5E-04 |
| 4.3E-06 | 1.5E-03 | 1.3E-03  | 5.9E-04 |
| 4.4E-06 | 1.8E-03 | 1.4E-03  | 1.0E-03 |
| 4.4E-06 | 1.7E-03 | 1.3E-03  | 9.5E-04 |
| 4.4E-06 | 1.5E-03 | 1.3E-03  | 4.1E-04 |
| 4.5E-06 | 1.3E-03 | 2.8E-04  | 8.2E-04 |
| 4.5E-06 | 1.8E-03 | 1.1E-03  | 8.5E-04 |
| 4.5E-06 | 1.6E-03 | 4.9E-05  | 8.1E-04 |
| 4.5E-06 | 7.7E-04 | 3.5E-04  | 4.9E-04 |
| 4.6E-06 | 1.2E-03 | 1.4E-03  | 8.5E-04 |
| 4.6E-06 | 8.4E-04 | 6.5E-04  | 7.5E-04 |
| 4.6E-06 | 1.2E-03 | 1.3E-03  | 4.4E-04 |
| 4.7E-06 | 1.6E-03 | 1.0E-03  | 9.2E-04 |
| 4.7E-06 | 1.1E-03 | 1.5E-03  | 4.7E-04 |
| 4.7E-06 | 1.9E-03 | 1.8E-03  | 9.9E-04 |
| 4.8E-06 | 1.5E-03 | 7.8E-04  | 6.8E-04 |
| 4.8E-06 | 1.6E-03 | 2.4E-04  | 5.8E-04 |
| 4.8E-06 | 9.4E-04 | 4.2E-04  | 6.9E-04 |
| 4.9E-06 | 1.6E-03 | -3.8E-04 | 3.4E-04 |
| 4.9E-06 | 8.6E-04 | 7.7E-04  | 1.0E-03 |
| 4.9E-06 | 1.6E-03 | 1.0E-03  | 8.1E-04 |
| 5.0E-06 | 1.3E-03 | 7.1E-04  | 6.0E-04 |
| 5.0E-06 | 1.1E-03 | 6.6E-04  | 7.3E-04 |
| 5.0E-06 | 9.4E-04 | 1.6E-03  | 5.3E-04 |
| 5.1E-06 | 1.1E-03 | 1.1E-03  | 9.2E-04 |
| 5.1E-06 | 4.8E-04 | 1.1E-03  | 1.3E-03 |
| 5.1E-06 | 9.4E-04 | 2.5E-04  | 7.3E-04 |
| 5.2E-06 | 1.5E-03 | 6.4E-04  | 1.1E-03 |
| 5.2E-06 | 9.0E-04 | 1.2E-03  | 9.2E-04 |
| 5.2E-06 | 1.4E-03 | 1.1E-03  | 8.1E-04 |
| 5.3E-06 | 7.7E-04 | 1.1E-03  | 1.1E-03 |
| 5.3E-06 | 9.9E-04 | 6.5E-04  | 1.6E-04 |
| 5.3E-06 | 1.1E-03 | 1.2E-03  | 6.3E-04 |
| 5.3E-06 | 1.5E-03 | 1.3E-03  | 5.8E-04 |
| 5.4E-06 | 1.1E-03 | 7.9E-04  | 5.1E-04 |
| 5.4E-06 | 1.3E-03 | 9.6E-04  | 7.1E-04 |
| 5.4E-06 | 1.3E-03 | -1.0E-05 | 1.2E-03 |
| 5.5E-06 | 5.0E-04 | 2.4E-04  | 6.2E-04 |
| 5.5E-06 | 6.8E-04 | 1.2E-03  | 1.0E-03 |
| 5.5E-06 | 6.5E-04 | 1.3E-03  | 7.1E-04 |
| 5.6E-06 | 7.4E-04 | 7.5E-04  | 7.2E-04 |
| 5.6E-06 | 8.5E-04 | 1.6E-03  | 7.1E-04 |
| 5.6E-06 | 1.0E-03 | 8.9E-04  | 2.3E-04 |
| 5.7E-06 | 9.7E-04 | 1.1E-03  | 1.0E-03 |
| 5.7E-06 | 6.7E-04 | 1.3E-03  | 7.3E-04 |
| 5.7E-06 | 3.1E-04 | 6.8E-04  | 8.7E-04 |

|         |         |          |          |
|---------|---------|----------|----------|
| 5.8E-06 | 5.2E-04 | 1.1E-03  | 8.8E-04  |
| 5.8E-06 | 9.1E-04 | 5.4E-04  | 8.1E-04  |
| 5.8E-06 | 1.2E-03 | 5.9E-04  | 3.6E-04  |
| 5.9E-06 | 1.0E-03 | 6.2E-04  | 1.1E-03  |
| 5.9E-06 | 9.8E-04 | 3.8E-05  | 3.1E-04  |
| 5.9E-06 | 1.3E-03 | 9.1E-04  | 7.7E-04  |
| 6.0E-06 | 7.8E-04 | 2.9E-04  | 4.3E-04  |
| 6.0E-06 | 1.0E-03 | 6.3E-04  | 9.5E-04  |
| 6.0E-06 | 1.1E-03 | -1.7E-04 | 1.1E-03  |
| 6.1E-06 | 1.1E-03 | 3.7E-05  | 8.6E-04  |
| 6.1E-06 | 6.8E-04 | 7.6E-04  | 1.9E-05  |
| 6.1E-06 | 1.3E-03 | 4.1E-04  | 7.1E-04  |
| 6.1E-06 | 4.4E-04 | 4.4E-04  | 5.2E-04  |
| 6.2E-06 | 6.9E-04 | 4.0E-04  | 6.0E-04  |
| 6.2E-06 | 4.8E-04 | 4.3E-04  | 3.3E-04  |
| 6.2E-06 | 5.5E-04 | 9.3E-04  | 6.9E-04  |
| 6.3E-06 | 9.5E-04 | 4.1E-04  | 5.6E-04  |
| 6.3E-06 | 5.5E-04 | 5.8E-04  | 4.9E-04  |
| 6.3E-06 | 6.8E-04 | 3.9E-04  | 3.8E-04  |
| 6.4E-06 | 6.9E-04 | 7.0E-04  | 9.9E-04  |
| 6.4E-06 | 7.8E-04 | 5.8E-04  | 3.2E-04  |
| 6.4E-06 | 7.1E-04 | 5.9E-04  | -8.0E-05 |
| 6.5E-06 | 4.1E-04 | 2.7E-04  | 4.7E-04  |
| 6.5E-06 | 8.6E-04 | 6.9E-04  | 4.5E-04  |
| 6.5E-06 | 9.3E-04 | 7.9E-04  | 4.9E-04  |
| 6.6E-06 | 9.1E-04 | 5.2E-04  | 9.9E-04  |
| 6.6E-06 | 8.3E-04 | -2.6E-04 | 5.2E-04  |
| 6.6E-06 | 5.6E-04 | 2.4E-04  | 2.6E-04  |
| 6.7E-06 | 1.7E-04 | 5.7E-04  | 8.2E-04  |
| 6.7E-06 | 1.2E-04 | 2.6E-04  | 6.7E-04  |
| 6.7E-06 | 9.2E-04 | 3.7E-04  | 5.2E-04  |
| 6.8E-06 | 4.9E-04 | 5.9E-04  | 5.3E-04  |
| 6.8E-06 | 6.4E-04 | 5.2E-04  | 6.0E-04  |
| 6.8E-06 | 6.0E-04 | 3.8E-04  | 1.2E-03  |
| 6.9E-06 | 4.9E-04 | 1.2E-04  | 5.6E-04  |
| 6.9E-06 | 5.0E-04 | -2.2E-04 | 2.2E-04  |
| 6.9E-06 | 5.2E-04 | 6.1E-05  | -1.0E-04 |
| 6.9E-06 | 8.1E-04 | 5.5E-04  | 2.0E-04  |
| 7.0E-06 | 5.1E-04 | 1.8E-04  | 1.9E-04  |
| 7.0E-06 | 4.6E-04 | 1.2E-03  | 2.1E-04  |
| 7.0E-06 | 8.5E-04 | 5.3E-04  | 3.9E-04  |
| 7.1E-06 | 5.9E-04 | 8.4E-04  | 4.1E-04  |
| 7.1E-06 | 7.2E-04 | 4.5E-04  | 3.2E-04  |
| 7.1E-06 | 4.0E-04 | 4.5E-04  | 1.7E-04  |
| 7.2E-06 | 9.8E-04 | 4.5E-05  | 4.0E-04  |
| 7.2E-06 | 7.7E-04 | 4.8E-04  | -1.9E-04 |
| 7.2E-06 | 6.8E-04 | -2.5E-06 | -8.7E-05 |
| 7.3E-06 | 9.7E-04 | 3.8E-04  | 5.4E-04  |
| 7.3E-06 | 1.0E-03 | 1.7E-05  | 2.4E-04  |
| 7.3E-06 | 1.1E-03 | 4.4E-05  | 4.9E-04  |
| 7.4E-06 | 9.0E-04 | 1.2E-03  | 2.3E-04  |
| 7.4E-06 | 1.0E-03 | 6.1E-04  | 4.0E-04  |
| 7.4E-06 | 4.8E-04 | 8.8E-05  | 5.8E-04  |
| 7.5E-06 | 7.5E-04 | 9.4E-04  | 6.9E-04  |

|         |         |          |          |
|---------|---------|----------|----------|
| 7.5E-06 | 4.1E-04 | 4.2E-04  | 8.3E-04  |
| 7.5E-06 | 1.2E-03 | 6.2E-04  | 5.9E-04  |
| 7.6E-06 | 3.8E-04 | 6.4E-04  | 3.1E-04  |
| 7.6E-06 | 2.9E-04 | 1.2E-04  | 1.6E-04  |
| 7.6E-06 | 8.8E-04 | 1.1E-04  | 9.3E-04  |
| 7.7E-06 | 5.8E-04 | 9.9E-04  | 6.6E-04  |
| 7.7E-06 | 7.2E-04 | 4.1E-04  | 5.1E-04  |
| 7.7E-06 | 5.5E-04 | 2.9E-04  | 5.9E-04  |
| 7.7E-06 | 3.1E-04 | 3.4E-04  | 4.2E-04  |
| 7.8E-06 | 8.2E-04 | 7.9E-04  | 7.5E-04  |
| 7.8E-06 | 7.4E-04 | 3.6E-04  | 9.2E-04  |
| 7.8E-06 | 5.5E-04 | 2.4E-04  | 8.7E-04  |
| 7.9E-06 | 7.0E-04 | 5.6E-04  | 1.4E-04  |
| 7.9E-06 | 7.2E-04 | 3.6E-04  | 7.9E-04  |
| 7.9E-06 | 7.7E-04 | 3.0E-04  | 7.3E-04  |
| 8.0E-06 | 7.7E-04 | 2.0E-04  | 5.9E-04  |
| 8.0E-06 | 7.0E-04 | 1.3E-04  | 2.9E-04  |
| 8.0E-06 | 8.1E-04 | 1.3E-04  | 3.6E-04  |
| 8.1E-06 | 5.7E-04 | 2.7E-04  | 2.1E-04  |
| 8.1E-06 | 9.2E-04 | 1.3E-04  | 8.3E-04  |
| 8.1E-06 | 7.8E-04 | 3.8E-04  | 7.2E-05  |
| 8.2E-06 | 6.5E-04 | 2.5E-04  | 7.1E-04  |
| 8.2E-06 | 2.1E-04 | 6.8E-05  | 2.9E-04  |
| 8.2E-06 | 1.7E-04 | 2.1E-04  | 4.5E-04  |
| 8.3E-06 | 2.4E-04 | 1.4E-04  | 3.9E-04  |
| 8.3E-06 | 9.7E-04 | 4.4E-04  | -7.2E-05 |
| 8.3E-06 | 9.8E-04 | 3.5E-04  | -5.5E-04 |
| 8.4E-06 | 4.5E-04 | 5.3E-04  | -3.5E-04 |
| 8.4E-06 | 8.9E-04 | 2.7E-04  | -3.5E-04 |
| 8.4E-06 | 8.4E-04 | 7.1E-05  | -4.4E-05 |
| 8.5E-06 | 9.5E-04 | 8.1E-05  | 3.3E-04  |
| 8.5E-06 | 9.5E-04 | 1.2E-04  | 1.4E-04  |
| 8.5E-06 | 4.7E-04 | 3.0E-04  | 4.5E-04  |
| 8.5E-06 | 1.2E-03 | 2.6E-04  | 3.5E-04  |
| 8.6E-06 | 1.3E-03 | 6.1E-04  | 3.8E-04  |
| 8.6E-06 | 8.5E-04 | 4.1E-04  | 9.4E-06  |
| 8.6E-06 | 5.7E-04 | 2.9E-04  | -1.1E-04 |
| 8.7E-06 | 3.2E-04 | 7.2E-04  | 1.2E-04  |
| 8.7E-06 | 6.2E-04 | 2.9E-04  | -2.8E-04 |
| 8.7E-06 | 9.2E-04 | 2.1E-04  | 2.6E-04  |
| 8.8E-06 | 1.1E-03 | 3.8E-04  | 2.0E-04  |
| 8.8E-06 | 7.8E-04 | 7.0E-05  | 7.0E-04  |
| 8.8E-06 | 6.3E-04 | 5.2E-05  | -2.9E-04 |
| 8.9E-06 | 1.0E-03 | 1.7E-04  | 5.6E-04  |
| 8.9E-06 | 1.4E-03 | 2.6E-04  | -2.1E-04 |
| 8.9E-06 | 7.3E-04 | 4.1E-05  | -6.3E-05 |
| 9.0E-06 | 7.7E-04 | 4.3E-04  | 1.6E-04  |
| 9.0E-06 | 8.8E-04 | 4.0E-04  | 2.0E-04  |
| 9.0E-06 | 1.1E-03 | 8.7E-05  | -3.5E-04 |
| 9.1E-06 | 9.5E-04 | 2.3E-04  | 7.2E-04  |
| 9.1E-06 | 5.9E-04 | 2.1E-04  | 4.5E-04  |
| 9.1E-06 | 8.0E-04 | 3.9E-04  | 2.8E-04  |
| 9.2E-06 | 1.1E-03 | -1.9E-04 | 4.4E-04  |
| 9.2E-06 | 5.9E-04 | -1.1E-04 | 4.5E-04  |

|         |         |          |          |
|---------|---------|----------|----------|
| 9.2E-06 | 5.8E-04 | 1.8E-04  | 4.8E-04  |
| 9.3E-06 | 1.1E-03 | 8.0E-05  | 1.9E-04  |
| 9.3E-06 | 1.2E-03 | -1.7E-04 | 5.7E-04  |
| 9.3E-06 | 1.0E-03 | 4.3E-04  | 6.1E-04  |
| 9.3E-06 | 7.4E-04 | 1.6E-04  | 4.2E-04  |
| 9.4E-06 | 6.3E-04 | 8.8E-05  | 6.0E-04  |
| 9.4E-06 | 5.8E-04 | 2.7E-04  | 2.5E-04  |
| 9.4E-06 | 8.5E-04 | 3.7E-04  | 4.2E-04  |
| 9.5E-06 | 2.6E-04 | 3.0E-04  | 2.3E-04  |
| 9.5E-06 | 8.2E-04 | 2.8E-04  | 1.5E-04  |
| 9.5E-06 | 1.1E-03 | 5.0E-04  | 3.5E-04  |
| 9.6E-06 | 5.8E-04 | 4.2E-04  | -1.0E-04 |
| 9.6E-06 | 9.5E-04 | 9.3E-05  | -3.6E-04 |
| 9.6E-06 | 1.4E-03 | 2.5E-04  | 3.5E-05  |
| 9.7E-06 | 1.1E-03 | 3.1E-04  | -3.8E-04 |
| 9.7E-06 | 1.2E-03 | 5.2E-05  | 9.2E-05  |
| 9.7E-06 | 8.9E-04 | 3.1E-05  | 4.0E-04  |
| 9.8E-06 | 1.2E-03 | 3.4E-04  | -1.1E-04 |
| 9.8E-06 | 6.2E-04 | 3.4E-04  | -5.6E-05 |
| 9.8E-06 | 1.1E-03 | 2.1E-04  | -3.4E-04 |
| 9.9E-06 | 5.9E-04 | 2.1E-04  | -2.3E-04 |
| 9.9E-06 | 1.0E-03 | 3.5E-04  | -4.6E-05 |
| 9.9E-06 | 1.0E-03 | 5.4E-04  | 4.3E-04  |
| 1.0E-05 | 1.1E-03 | 1.8E-04  | 2.2E-04  |
| 1.0E-05 | 1.1E-03 | -3.0E-06 | -6.9E-05 |
| 1.0E-05 | 5.9E-04 | 4.4E-04  | 2.4E-04  |
| 1.0E-05 | 1.2E-03 | 5.6E-05  | -1.3E-04 |
| 1.0E-05 | 8.8E-04 | 4.9E-04  | -1.1E-04 |
| 1.0E-05 | 1.1E-03 | 1.8E-04  | 5.7E-04  |
| 1.0E-05 | 1.0E-03 | 2.3E-04  | 1.5E-04  |
| 1.0E-05 | 1.1E-03 | 1.5E-04  | 3.0E-04  |
| 1.0E-05 | 7.4E-04 | 4.2E-04  | 1.5E-04  |
| 1.0E-05 | 9.5E-04 | 2.2E-04  | 1.1E-04  |
| 1.0E-05 | 1.0E-03 | 2.4E-04  | -5.0E-05 |
| 1.0E-05 | 9.3E-04 | -2.5E-05 | 1.7E-05  |
| 1.0E-05 | 1.2E-03 | 1.9E-04  | 2.0E-04  |
| 1.0E-05 | 1.2E-03 | 1.8E-04  | 2.8E-04  |
| 1.0E-05 | 1.3E-03 | 5.1E-04  | 2.5E-04  |
| 1.0E-05 | 4.3E-04 | -8.5E-05 | -2.1E-04 |
| 1.1E-05 | 5.4E-04 | 3.3E-04  | -2.5E-04 |
| 1.1E-05 | 1.2E-03 | 2.7E-05  | -3.8E-04 |
| 1.1E-05 | 9.7E-04 | 4.1E-04  | -9.3E-05 |
| 1.1E-05 | 4.0E-04 | 2.3E-04  | -4.0E-04 |
| 1.1E-05 | 6.4E-04 | 1.2E-04  | -3.2E-04 |
| 1.1E-05 | 3.8E-04 | 1.1E-04  | -5.6E-05 |
| 1.1E-05 | 1.1E-03 | -1.6E-05 | 3.6E-04  |
| 1.1E-05 | 1.1E-03 | 1.5E-04  | -1.9E-04 |
| 1.1E-05 | 1.4E-03 | 1.4E-04  | -1.1E-04 |
| 1.1E-05 | 4.5E-04 | 3.9E-04  | 9.4E-05  |
| 1.1E-05 | 1.1E-03 | 6.1E-04  | 2.2E-04  |
| 1.1E-05 | 4.7E-04 | -4.9E-04 | 8.2E-05  |
| 1.1E-05 | 3.9E-05 | 2.1E-04  | -2.2E-07 |
| 1.1E-05 | 1.0E-03 | -1.3E-04 | -9.6E-05 |
| 1.1E-05 | 8.3E-04 | 3.0E-04  | -1.7E-04 |



|         |          |          |          |
|---------|----------|----------|----------|
| 1.1E-05 | 1.0E-03  | -2.7E-04 | 5.4E-05  |
| 1.1E-05 | 7.9E-04  | -1.1E-04 | 4.9E-05  |
| 1.1E-05 | 9.4E-04  | 1.1E-04  | -1.5E-04 |
| 1.1E-05 | 5.5E-04  | 6.1E-04  | -2.1E-04 |
| 1.1E-05 | 1.1E-03  | 2.0E-04  | 2.4E-04  |
| 1.1E-05 | 4.6E-04  | 2.9E-04  | -5.7E-05 |
| 1.1E-05 | 1.2E-03  | 2.5E-04  | -3.5E-04 |
| 1.1E-05 | 1.0E-03  | 8.2E-05  | -3.1E-04 |
| 1.1E-05 | 1.0E-03  | -2.2E-04 | -1.9E-04 |
| 1.1E-05 | 1.1E-03  | 6.6E-04  | -3.6E-05 |
| 1.1E-05 | 7.3E-04  | -1.7E-04 | 2.5E-05  |
| 1.1E-05 | 5.5E-04  | 8.7E-05  | -3.6E-04 |
| 1.1E-05 | 1.2E-03  | 2.7E-04  | 3.0E-05  |
| 1.1E-05 | 6.5E-04  | 3.4E-04  | -4.3E-04 |
| 1.1E-05 | 1.0E-03  | 8.8E-04  | -4.0E-04 |
| 1.1E-05 | 9.5E-04  | 4.6E-04  | 1.6E-04  |
| 1.2E-05 | 8.0E-04  | 2.1E-04  | -2.0E-04 |
| 1.2E-05 | -4.1E-05 | 3.6E-04  | -2.9E-04 |
| 1.2E-05 | 9.4E-04  | 1.4E-04  | -4.9E-04 |
| 1.2E-05 | 8.8E-04  | -5.1E-04 | -3.5E-04 |
| 1.2E-05 | 7.0E-04  | 2.1E-04  | -5.1E-04 |
| 1.2E-05 | 9.4E-05  | 3.3E-04  | 1.1E-04  |
| 1.2E-05 | 6.7E-04  | -7.1E-04 | -2.7E-04 |
| 1.2E-05 | 2.8E-04  | 4.3E-04  | -1.8E-04 |
| 1.2E-05 | 3.8E-04  | 1.7E-04  | 3.2E-04  |
| 1.2E-05 | 1.2E-03  | 3.0E-04  | 6.7E-05  |
| 1.2E-05 | 9.7E-04  | -2.0E-05 | -1.6E-04 |
| 1.2E-05 | 2.5E-04  | 1.1E-04  | 4.3E-05  |
| 1.2E-05 | 8.4E-04  | 1.0E-04  | 3.3E-04  |
| 1.2E-05 | 3.0E-04  | 4.1E-06  | 6.7E-04  |
| 1.2E-05 | 7.5E-04  | -8.9E-05 | -3.1E-04 |
| 1.2E-05 | 8.6E-04  | 5.5E-04  | -8.0E-04 |
| 1.2E-05 | 8.4E-04  | 3.2E-04  | -1.7E-04 |
| 1.2E-05 | -3.5E-04 | -2.3E-04 | -2.9E-04 |
| 1.2E-05 | 5.2E-04  | 5.2E-04  | -6.2E-04 |
| 1.2E-05 | 8.6E-04  | -6.9E-04 | -4.6E-04 |
| 1.2E-05 | 7.8E-04  | 3.0E-04  | 1.5E-04  |
| 1.2E-05 | 9.8E-04  | 4.7E-04  | -1.3E-04 |
| 1.2E-05 | 5.8E-04  | -2.8E-04 | 2.1E-04  |
| 1.2E-05 | 7.9E-04  | 3.0E-05  | 1.4E-04  |
| 1.2E-05 | 9.2E-04  | 2.1E-04  | -2.9E-04 |
| 1.2E-05 | 4.6E-04  | -1.5E-04 | -8.0E-05 |
| 1.2E-05 | 5.7E-04  | -3.6E-04 | 7.6E-05  |
| 1.2E-05 | 8.5E-04  | 8.4E-04  | 1.7E-04  |
| 1.2E-05 | 1.2E-03  | 3.9E-05  | -1.2E-04 |
| 1.2E-05 | 9.9E-04  | 2.9E-04  | 1.6E-05  |
| 1.2E-05 | 5.0E-04  | -3.4E-04 | 2.1E-04  |
| 1.3E-05 | 9.7E-04  | 4.1E-04  | -6.3E-04 |
| 1.3E-05 | 8.4E-04  | -2.3E-04 | -1.8E-04 |
| 1.3E-05 | 1.0E-03  | -6.2E-04 | 1.8E-05  |
| 1.3E-05 | 8.2E-04  | -4.5E-04 | 2.1E-04  |
| 1.3E-05 | 1.1E-03  | 5.1E-04  | 6.3E-05  |
| 1.3E-05 | 8.0E-04  | -2.9E-04 | 3.1E-04  |
| 1.3E-05 | 6.6E-04  | 2.9E-04  | 6.4E-04  |

|         |          |          |          |
|---------|----------|----------|----------|
| 1.3E-05 | 2.6E-05  | 1.1E-04  | -7.3E-04 |
| 1.3E-05 | 1.2E-03  | -1.0E-04 | 4.7E-04  |
| 1.3E-05 | 1.0E-03  | 4.3E-04  | 2.0E-04  |
| 1.3E-05 | 7.6E-04  | -1.3E-04 | -4.9E-05 |
| 1.3E-05 | 3.3E-04  | 2.3E-04  | 1.5E-04  |
| 1.3E-05 | 1.2E-03  | 8.2E-04  | 1.8E-04  |
| 1.3E-05 | 4.4E-04  | -6.7E-05 | -2.7E-04 |
| 1.3E-05 | 1.1E-03  | 9.9E-05  | -2.5E-04 |
| 1.3E-05 | 1.4E-04  | -3.0E-04 | -3.5E-04 |
| 1.3E-05 | 9.9E-04  | -7.3E-04 | 5.7E-04  |
| 1.3E-05 | 3.5E-04  | 4.9E-04  | 6.6E-05  |
| 1.3E-05 | 6.8E-04  | -3.7E-04 | -1.5E-04 |
| 1.3E-05 | 8.7E-04  | 1.4E-05  | 4.1E-05  |
| 1.3E-05 | 1.2E-03  | 1.1E-04  | -7.0E-05 |
| 1.3E-05 | 5.9E-04  | -6.0E-04 | -1.3E-04 |
| 1.3E-05 | 9.2E-04  | -1.7E-04 | -2.3E-04 |
| 1.3E-05 | 5.7E-04  | -6.7E-05 | 3.1E-05  |
| 1.3E-05 | 8.6E-04  | 7.7E-04  | -1.7E-04 |
| 1.3E-05 | 9.8E-04  | -2.2E-04 | 8.4E-05  |
| 1.3E-05 | 6.9E-04  | 4.5E-04  | -5.1E-05 |
| 1.3E-05 | 4.3E-04  | 2.5E-04  | -1.2E-04 |
| 1.3E-05 | 4.2E-04  | 2.8E-04  | 3.5E-04  |
| 1.3E-05 | 7.9E-04  | 5.5E-04  | -2.5E-04 |
| 1.3E-05 | 4.4E-04  | 2.5E-04  | 1.3E-04  |
| 1.3E-05 | 7.2E-04  | 2.5E-04  | 1.7E-04  |
| 1.4E-05 | 1.0E-03  | 5.9E-04  | 2.4E-04  |
| 1.4E-05 | 8.8E-04  | -2.1E-05 | 2.1E-04  |
| 1.4E-05 | 6.0E-04  | 1.3E-05  | 2.4E-04  |
| 1.4E-05 | 7.8E-04  | -2.3E-04 | 1.6E-04  |
| 1.4E-05 | 4.5E-04  | 3.2E-05  | 2.0E-04  |
| 1.4E-05 | 8.9E-04  | 4.9E-04  | 2.3E-04  |
| 1.4E-05 | 7.6E-04  | -6.1E-04 | 2.8E-04  |
| 1.4E-05 | 4.6E-04  | 2.5E-05  | 9.4E-04  |
| 1.4E-05 | 1.9E-04  | -4.7E-04 | -6.1E-05 |
| 1.4E-05 | 9.5E-04  | -2.1E-04 | 4.3E-04  |
| 1.4E-05 | 9.5E-04  | 4.7E-04  | 1.5E-05  |
| 1.4E-05 | 4.3E-04  | 4.4E-05  | 1.1E-04  |
| 1.4E-05 | 7.9E-04  | 4.0E-04  | 2.1E-04  |
| 1.4E-05 | 6.3E-04  | -4.3E-04 | -1.1E-04 |
| 1.4E-05 | 4.6E-04  | -2.0E-05 | 7.1E-04  |
| 1.4E-05 | 3.5E-04  | -3.3E-04 | 6.3E-04  |
| 1.4E-05 | 5.7E-04  | -3.6E-05 | 3.8E-04  |
| 1.4E-05 | 8.0E-04  | -1.4E-04 | 3.9E-05  |
| 1.4E-05 | 4.5E-04  | -1.4E-04 | 3.6E-04  |
| 1.4E-05 | -3.1E-04 | -2.7E-04 | -2.4E-04 |
| 1.4E-05 | 5.2E-04  | -2.6E-04 | 2.7E-04  |
| 1.4E-05 | 6.7E-04  | -5.9E-04 | -2.8E-04 |
| 1.4E-05 | 5.7E-04  | 2.1E-04  | -2.8E-04 |
| 1.4E-05 | 8.2E-04  | -5.0E-04 | -8.3E-05 |
| 1.4E-05 | 1.1E-03  | -1.9E-04 | 4.9E-05  |
| 1.4E-05 | 1.4E-04  | 2.7E-04  | 3.3E-04  |
| 1.4E-05 | 4.3E-05  | 3.9E-04  | 8.8E-05  |
| 1.4E-05 | 1.3E-03  | -3.5E-04 | 3.5E-04  |
| 1.4E-05 | 6.0E-04  | -1.7E-04 | -2.9E-04 |

|         |         |          |          |
|---------|---------|----------|----------|
| 1.4E-05 | 5.7E-04 | -1.7E-04 | -1.7E-04 |
| 1.4E-05 | 7.6E-04 | -3.7E-04 | -2.4E-04 |
| 1.5E-05 | 9.4E-04 | 1.8E-04  | 2.8E-04  |
| 1.5E-05 | 6.9E-04 | -2.9E-04 | -3.1E-04 |
| 1.5E-05 | 3.7E-04 | 2.1E-04  | 2.4E-04  |
| 1.5E-05 | 1.0E-03 | 5.0E-06  | 3.6E-04  |
| 1.5E-05 | 1.4E-04 | 3.3E-04  | 1.6E-04  |
| 1.5E-05 | 4.3E-04 | -2.9E-04 | 2.8E-05  |
| 1.5E-05 | 9.9E-04 | -5.3E-05 | 5.5E-04  |
| 1.5E-05 | 1.4E-04 | 1.3E-04  | -4.2E-05 |
| 1.5E-05 | 1.0E-03 | 5.1E-04  | -1.3E-04 |
| 1.5E-05 | 6.9E-04 | -2.3E-04 | -1.2E-04 |
| 1.5E-05 | 6.2E-04 | -3.0E-04 | 3.8E-04  |
| 1.5E-05 | 5.3E-04 | 9.2E-05  | 2.4E-04  |
| 1.5E-05 | 5.9E-04 | 5.7E-04  | 7.1E-04  |
| 1.5E-05 | 5.4E-04 | 6.8E-04  | 3.2E-04  |
| 1.5E-05 | 1.4E-04 | -8.7E-05 | 2.6E-04  |
| 1.5E-05 | 1.0E-03 | -8.3E-05 | 5.6E-04  |
| 1.5E-05 | 4.6E-04 | 2.7E-04  | 2.3E-04  |
